# Supplementary material for: Co-Expression Networks for Causal Gene Identification Based on RNA-seq Data of C<em>orynebacterium Pseudotuberculosis</em>
Source: Preprints.org preprint supplement (doi:10.20944/preprints202006.0144.v1), 2020-06-12
Supplement: Supplementary file 1 [file Datasheet1-Whole_genomes_networks_all_strains.xlsx]

## Sheet: CP-13_Network
CpCp13_RS08215	CpCp13_RS09220
CpCp13_RS07030	CpCp13_RS05205
CpCp13_RS01030	CpCp13_RS05165
CpCp13_RS00265	CpCp13_RS03035
CpCp13_RS00450	CpCp13_RS09405
CpCp13_RS07860	CpCp13_RS09275
CpCp13_RS05880	CpCp13_RS07385
CpCp13_RS00860	CpCp13_RS03910
CpCp13_RS07030	CpCp13_RS05465
CpCp13_RS01030	CpCp13_RS10395
CpCp13_RS08215	CpCp13_RS02360
CpCp13_RS00860	CpCp13_RS02490
CpCp13_RS00265	CpCp13_RS07775
CpCp13_RS04005	CpCp13_RS08505
CpCp13_RS01180	CpCp13_RS09835
CpCp13_RS01030	CpCp13_RS06640
CpCp13_RS00450	CpCp13_RS10260
CpCp13_RS01030	CpCp13_RS06770
CpCp13_RS09725	CpCp13_RS00430
CpCp13_RS09275	CpCp13_RS07860
CpCp13_RS01030	CpCp13_RS03800
CpCp13_RS07860	CpCp13_RS07875
CpCp13_RS07030	CpCp13_RS03565
CpCp13_RS07030	CpCp13_RS04295
CpCp13_RS08185	CpCp13_RS01995
CpCp13_RS09910	CpCp13_RS04780
CpCp13_RS00360	CpCp13_RS07100
CpCp13_RS00145	CpCp13_RS05420
CpCp13_RS07535	CpCp13_RS05655
CpCp13_RS01030	CpCp13_RS10010
CpCp13_RS07735	CpCp13_RS02445
CpCp13_RS08080	CpCp13_RS01455
CpCp13_RS08080	CpCp13_RS00070
CpCp13_RS03440	CpCp13_RS00205
CpCp13_RS04005	CpCp13_RS07070
CpCp13_RS07735	CpCp13_RS01085
CpCp13_RS09405	CpCp13_RS00450
CpCp13_RS02310	CpCp13_RS01470
CpCp13_RS09405	CpCp13_RS05495
CpCp13_RS07030	CpCp13_RS00070
CpCp13_RS01885	CpCp13_RS09185
CpCp13_RS07030	CpCp13_RS05485
CpCp13_RS08080	CpCp13_RS04000
CpCp13_RS07030	CpCp13_RS04000
CpCp13_RS00860	CpCp13_RS09000
CpCp13_RS09405	CpCp13_RS05450
CpCp13_RS09165	CpCp13_RS03270
CpCp13_RS01600	CpCp13_RS10080
CpCp13_RS05645	CpCp13_RS00520
CpCp13_RS00145	CpCp13_RS02280
CpCp13_RS03070	CpCp13_RS06465
CpCp13_RS03070	CpCp13_RS02340
CpCp13_RS01885	CpCp13_RS00455
CpCp13_RS01180	CpCp13_RS08505
CpCp13_RS01180	CpCp13_RS10740
CpCp13_RS03720	CpCp13_RS07320
CpCp13_RS03070	CpCp13_RS04300
CpCp13_RS01180	CpCp13_RS06805
CpCp13_RS00360	CpCp13_RS06145
CpCp13_RS07030	CpCp13_RS04245
CpCp13_RS00570	CpCp13_RS07080
CpCp13_RS07030	CpCp13_RS05495
CpCp13_RS00570	CpCp13_RS10255
CpCp13_RS09405	CpCp13_RS01455
CpCp13_RS04005	CpCp13_RS08145
CpCp13_RS00115	CpCp13_RS09290
CpCp13_RS07030	CpCp13_RS02115
CpCp13_RS09165	CpCp13_RS06675
CpCp13_RS04000	CpCp13_RS01515
CpCp13_RS06770	CpCp13_RS03685
CpCp13_RS04000	CpCp13_RS02265
CpCp13_RS04120	CpCp13_RS07250
CpCp13_RS00145	CpCp13_RS05050
CpCp13_RS07535	CpCp13_RS05285
CpCp13_RS09275	CpCp13_RS07340
CpCp13_RS00145	CpCp13_RS08040
CpCp13_RS03720	CpCp13_RS00070
CpCp13_RS08080	CpCp13_RS05065
CpCp13_RS00795	CpCp13_RS07635
CpCp13_RS00860	CpCp13_RS00180
CpCp13_RS05755	CpCp13_RS04505
CpCp13_RS09765	CpCp13_RS00045
CpCp13_RS01030	CpCp13_RS05650
CpCp13_RS04730	CpCp13_RS09650
CpCp13_RS01030	CpCp13_RS10530
CpCp13_RS09765	CpCp13_RS06595
CpCp13_RS00860	CpCp13_RS04470
CpCp13_RS09405	CpCp13_RS00875
CpCp13_RS00860	CpCp13_RS10675
CpCp13_RS00015	CpCp13_RS04320
CpCp13_RS00145	CpCp13_RS09425
CpCp13_RS03490	CpCp13_RS03360
CpCp13_RS09165	CpCp13_RS09470
CpCp13_RS03720	CpCp13_RS02255
CpCp13_RS00570	CpCp13_RS07085
CpCp13_RS04005	CpCp13_RS06785
CpCp13_RS03070	CpCp13_RS10470
CpCp13_RS03070	CpCp13_RS05420
CpCp13_RS03720	CpCp13_RS03715
CpCp13_RS09405	CpCp13_RS09770
CpCp13_RS07535	CpCp13_RS05295
CpCp13_RS01030	CpCp13_RS02555
CpCp13_RS00860	CpCp13_RS03000
CpCp13_RS04005	CpCp13_RS01180
CpCp13_RS07030	CpCp13_RS05450
CpCp13_RS04005	CpCp13_RS08570
CpCp13_RS09405	CpCp13_RS10030
CpCp13_RS03720	CpCp13_RS02275
CpCp13_RS03075	CpCp13_RS06095
CpCp13_RS01885	CpCp13_RS09760
CpCp13_RS00450	CpCp13_RS10030
CpCp13_RS09275	CpCp13_RS07505
CpCp13_RS03755	CpCp13_RS00210
CpCp13_RS10455	CpCp13_RS01975
CpCp13_RS03070	CpCp13_RS05500
CpCp13_RS00145	CpCp13_RS02075
CpCp13_RS01225	CpCp13_RS01230
CpCp13_RS04000	CpCp13_RS08760
CpCp13_RS03720	CpCp13_RS05050
CpCp13_RS02310	CpCp13_RS07390
CpCp13_RS05645	CpCp13_RS09990
CpCp13_RS03720	CpCp13_RS02265
CpCp13_RS09165	CpCp13_RS06670
CpCp13_RS00145	CpCp13_RS05165
CpCp13_RS01600	CpCp13_RS01605
CpCp13_RS00570	CpCp13_RS00620
CpCp13_RS04665	CpCp13_RS02625
CpCp13_RS00795	CpCp13_RS07595
CpCp13_RS04005	CpCp13_RS08760
CpCp13_RS03070	CpCp13_RS00550
CpCp13_RS03720	CpCp13_RS02280
CpCp13_RS07030	CpCp13_RS09905
CpCp13_RS06210	CpCp13_RS08375
CpCp13_RS09405	CpCp13_RS01210
CpCp13_RS09165	CpCp13_RS07950
CpCp13_RS04000	CpCp13_RS00070
CpCp13_RS08080	CpCp13_RS05280
CpCp13_RS07535	CpCp13_RS04670
CpCp13_RS02160	CpCp13_RS03705
CpCp13_RS05645	CpCp13_RS03475
CpCp13_RS01600	CpCp13_RS01610
CpCp13_RS01030	CpCp13_RS03560
CpCp13_RS06210	CpCp13_RS03900
CpCp13_RS04005	CpCp13_RS09270
CpCp13_RS04005	CpCp13_RS08860
CpCp13_RS00310	CpCp13_RS07215
CpCp13_RS01470	CpCp13_RS02310
CpCp13_RS03490	CpCp13_RS02090
CpCp13_RS06210	CpCp13_RS00670
CpCp13_RS09990	CpCp13_RS03475
CpCp13_RS00145	CpCp13_RS06640
CpCp13_RS04120	CpCp13_RS01230
CpCp13_RS05880	CpCp13_RS07830
CpCp13_RS03635	CpCp13_RS09535
CpCp13_RS09405	CpCp13_RS06060
CpCp13_RS08080	CpCp13_RS05030
CpCp13_RS01480	CpCp13_RS03400
CpCp13_RS08080	CpCp13_RS02115
CpCp13_RS09275	CpCp13_RS10850
CpCp13_RS04665	CpCp13_RS03985
CpCp13_RS08080	CpCp13_RS02275
CpCp13_RS00570	CpCp13_RS02295
CpCp13_RS02340	CpCp13_RS04300
CpCp13_RS09725	CpCp13_RS04935
CpCp13_RS07535	CpCp13_RS02110
CpCp13_RS08795	CpCp13_RS10755
CpCp13_RS01895	CpCp13_RS00440
CpCp13_RS08215	CpCp13_RS00190
CpCp13_RS01030	CpCp13_RS03685
CpCp13_RS04005	CpCp13_RS09835
CpCp13_RS09165	CpCp13_RS05830
CpCp13_RS02365	CpCp13_RS02110
CpCp13_RS08080	CpCp13_RS05295
CpCp13_RS01030	CpCp13_RS08580
CpCp13_RS07030	CpCp13_RS08080
CpCp13_RS01030	CpCp13_RS09905
CpCp13_RS00115	CpCp13_RS06155
CpCp13_RS00385	CpCp13_RS09285
CpCp13_RS09165	CpCp13_RS10125
CpCp13_RS02365	CpCp13_RS03875
CpCp13_RS01885	CpCp13_RS03160
CpCp13_RS02160	CpCp13_RS00315
CpCp13_RS00450	CpCp13_RS05820
CpCp13_RS04000	CpCp13_RS04245
CpCp13_RS00605	CpCp13_RS09325
CpCp13_RS03070	CpCp13_RS05485
CpCp13_RS00860	CpCp13_RS10020
CpCp13_RS04120	CpCp13_RS01225
CpCp13_RS01180	CpCp13_RS04005
CpCp13_RS06060	CpCp13_RS10030
CpCp13_RS00145	CpCp13_RS05095
CpCp13_RS00605	CpCp13_RS00510
CpCp13_RS06210	CpCp13_RS04450
CpCp13_RS07030	CpCp13_RS04425
CpCp13_RS07030	CpCp13_RS07320
CpCp13_RS04005	CpCp13_RS04000
CpCp13_RS00280	CpCp13_RS08225
CpCp13_RS08605	CpCp13_RS06565
CpCp13_RS00145	CpCp13_RS09905
CpCp13_RS00145	CpCp13_RS01450
CpCp13_RS09405	CpCp13_RS08730
CpCp13_RS01180	CpCp13_RS05495
CpCp13_RS08605	CpCp13_RS07900
CpCp13_RS01030	CpCp13_RS03895
CpCp13_RS00450	CpCp13_RS03795
CpCp13_RS03720	CpCp13_RS04245
CpCp13_RS10405	CpCp13_RS05050
CpCp13_RS07735	CpCp13_RS07900
CpCp13_RS05010	CpCp13_RS03335
CpCp13_RS01580	CpCp13_RS06420
CpCp13_RS03070	CpCp13_RS06835
CpCp13_RS03665	CpCp13_RS02795
CpCp13_RS04665	CpCp13_RS07555
CpCp13_RS00360	CpCp13_RS00620
CpCp13_RS03720	CpCp13_RS04010
CpCp13_RS04120	CpCp13_RS00295
CpCp13_RS00570	CpCp13_RS07100
CpCp13_RS09725	CpCp13_RS06005
CpCp13_RS03720	CpCp13_RS02075
CpCp13_RS06230	CpCp13_RS01110
CpCp13_RS00915	CpCp13_RS03885
CpCp13_RS00450	CpCp13_RS10020
CpCp13_RS07830	CpCp13_RS07380
CpCp13_RS08080	CpCp13_RS06045
CpCp13_RS08080	CpCp13_RS07320
CpCp13_RS09725	CpCp13_RS07000
CpCp13_RS09725	CpCp13_RS03200
CpCp13_RS01895	CpCp13_RS08045
CpCp13_RS09765	CpCp13_RS02315
CpCp13_RS03020	CpCp13_RS08145
CpCp13_RS00860	CpCp13_RS03040
CpCp13_RS02965	CpCp13_RS10860
CpCp13_RS04120	CpCp13_RS06435
CpCp13_RS03075	CpCp13_RS05475
CpCp13_RS00145	CpCp13_RS05690
CpCp13_RS00310	CpCp13_RS00130
CpCp13_RS00145	CpCp13_RS02275
CpCp13_RS05880	CpCp13_RS04735
CpCp13_RS10405	CpCp13_RS05165
CpCp13_RS04000	CpCp13_RS03785
CpCp13_RS09355	CpCp13_RS00150
CpCp13_RS00145	CpCp13_RS02285
CpCp13_RS10455	CpCp13_RS01565
CpCp13_RS07535	CpCp13_RS00495
CpCp13_RS09910	CpCp13_RS05410
CpCp13_RS07645	CpCp13_RS01415
CpCp13_RS01205	CpCp13_RS05185
CpCp13_RS07030	CpCp13_RS02265
CpCp13_RS01030	CpCp13_RS02285
CpCp13_RS07645	CpCp13_RS03215
CpCp13_RS07030	CpCp13_RS02275
CpCp13_RS07735	CpCp13_RS02620
CpCp13_RS07735	CpCp13_RS05305
CpCp13_RS02260	CpCp13_RS01515
CpCp13_RS05880	CpCp13_RS06740
CpCp13_RS09165	CpCp13_RS06175
CpCp13_RS01580	CpCp13_RS09135
CpCp13_RS08080	CpCp13_RS10635
CpCp13_RS08285	CpCp13_RS09675
CpCp13_RS03415	CpCp13_RS04575
CpCp13_RS00360	CpCp13_RS07085
CpCp13_RS03075	CpCp13_RS03715
CpCp13_RS00180	CpCp13_RS10020
CpCp13_RS03720	CpCp13_RS05690
CpCp13_RS04665	CpCp13_RS04830
CpCp13_RS09165	CpCp13_RS00655
CpCp13_RS00145	CpCp13_RS05605
CpCp13_RS03910	CpCp13_RS03650
CpCp13_RS05755	CpCp13_RS03985
CpCp13_RS09765	CpCp13_RS08380
CpCp13_RS07595	CpCp13_RS00795
CpCp13_RS00145	CpCp13_RS07065
CpCp13_RS09405	CpCp13_RS03795
CpCp13_RS00145	CpCp13_RS05500
CpCp13_RS03720	CpCp13_RS09900
CpCp13_RS03020	CpCp13_RS08585
CpCp13_RS00145	CpCp13_RS07320
CpCp13_RS05755	CpCp13_RS05070
CpCp13_RS02340	CpCp13_RS10470
CpCp13_RS09990	CpCp13_RS05645
CpCp13_RS09405	CpCp13_RS05810
CpCp13_RS09960	CpCp13_RS04630
CpCp13_RS01895	CpCp13_RS06160
CpCp13_RS07860	CpCp13_RS08670
CpCp13_RS01030	CpCp13_RS05705
CpCp13_RS03415	CpCp13_RS00185
CpCp13_RS00860	CpCp13_RS01190
CpCp13_RS00080	CpCp13_RS00900
CpCp13_RS01610	CpCp13_RS01600
CpCp13_RS05880	CpCp13_RS02145
CpCp13_RS03415	CpCp13_RS03755
CpCp13_RS07465	CpCp13_RS03505
CpCp13_RS05880	CpCp13_RS03985
CpCp13_RS01180	CpCp13_RS08860
CpCp13_RS03020	CpCp13_RS04005
CpCp13_RS00860	CpCp13_RS05280
CpCp13_RS04975	CpCp13_RS05065
CpCp13_RS06435	CpCp13_RS00890
CpCp13_RS04495	CpCp13_RS05135
CpCp13_RS04665	CpCp13_RS02660
CpCp13_RS06625	CpCp13_RS10020
CpCp13_RS00310	CpCp13_RS00765
CpCp13_RS06625	CpCp13_RS01205
CpCp13_RS01180	CpCp13_RS05455
CpCp13_RS08215	CpCp13_RS00425
CpCp13_RS05880	CpCp13_RS06755
CpCp13_RS00145	CpCp13_RS05990
CpCp13_RS02310	CpCp13_RS10060
CpCp13_RS07595	CpCp13_RS07635
CpCp13_RS08080	CpCp13_RS05465
CpCp13_RS00145	CpCp13_RS04990
CpCp13_RS08080	CpCp13_RS05485
CpCp13_RS04515	CpCp13_RS00495
CpCp13_RS08080	CpCp13_RS05495
CpCp13_RS09355	CpCp13_RS03285
CpCp13_RS09355	CpCp13_RS08085
CpCp13_RS07830	CpCp13_RS07110
CpCp13_RS07830	CpCp13_RS03755
CpCp13_RS03020	CpCp13_RS04300
CpCp13_RS00175	CpCp13_RS06595
CpCp13_RS06770	CpCp13_RS08580
CpCp13_RS01570	CpCp13_RS07435
CpCp13_RS01570	CpCp13_RS04550
CpCp13_RS09165	CpCp13_RS02785
CpCp13_RS07860	CpCp13_RS02405
CpCp13_RS07860	CpCp13_RS06745
CpCp13_RS03865	CpCp13_RS03410
CpCp13_RS07860	CpCp13_RS10850
CpCp13_RS10250	CpCp13_RS05875
CpCp13_RS07695	CpCp13_RS10885
CpCp13_RS10125	CpCp13_RS04250
CpCp13_RS04000	CpCp13_RS05495
CpCp13_RS03865	CpCp13_RS10855
CpCp13_RS01895	CpCp13_RS02050
CpCp13_RS03070	CpCp13_RS05745
CpCp13_RS00860	CpCp13_RS03340
CpCp13_RS04005	CpCp13_RS03995
CpCp13_RS08285	CpCp13_RS05655
CpCp13_RS01030	CpCp13_RS03725
CpCp13_RS01030	CpCp13_RS07575
CpCp13_RS01030	CpCp13_RS03785
CpCp13_RS06435	CpCp13_RS04120
CpCp13_RS06060	CpCp13_RS09405
CpCp13_RS06060	CpCp13_RS07870
CpCp13_RS00265	CpCp13_RS02055
CpCp13_RS00860	CpCp13_RS03650
CpCp13_RS07030	CpCp13_RS08730
CpCp13_RS07775	CpCp13_RS00265
CpCp13_RS03720	CpCp13_RS05435
CpCp13_RS09370	CpCp13_RS00315
CpCp13_RS03720	CpCp13_RS04000
CpCp13_RS03720	CpCp13_RS05030
CpCp13_RS00450	CpCp13_RS08880
CpCp13_RS04495	CpCp13_RS01205
CpCp13_RS03865	CpCp13_RS02440
CpCp13_RS03960	CpCp13_RS01535
CpCp13_RS07030	CpCp13_RS00875
CpCp13_RS01885	CpCp13_RS03145
CpCp13_RS07535	CpCp13_RS09620
CpCp13_RS07735	CpCp13_RS00290
CpCp13_RS07425	CpCp13_RS07215
CpCp13_RS05990	CpCp13_RS04865
CpCp13_RS07030	CpCp13_RS03785
CpCp13_RS07695	CpCp13_RS08965
CpCp13_RS04000	CpCp13_RS03370
CpCp13_RS04005	CpCp13_RS03090
CpCp13_RS01580	CpCp13_RS00680
CpCp13_RS04665	CpCp13_RS07585
CpCp13_RS00450	CpCp13_RS07870
CpCp13_RS08080	CpCp13_RS00150
CpCp13_RS03720	CpCp13_RS07570
CpCp13_RS05755	CpCp13_RS06755
CpCp13_RS00210	CpCp13_RS06505
CpCp13_RS03755	CpCp13_RS09115
CpCp13_RS02260	CpCp13_RS08760
CpCp13_RS09165	CpCp13_RS06190
CpCp13_RS02365	CpCp13_RS09845
CpCp13_RS03415	CpCp13_RS02990
CpCp13_RS09275	CpCp13_RS05655
CpCp13_RS00860	CpCp13_RS03475
CpCp13_RS02965	CpCp13_RS03080
CpCp13_RS00860	CpCp13_RS08380
CpCp13_RS03070	CpCp13_RS06805
CpCp13_RS03070	CpCp13_RS03020
CpCp13_RS09165	CpCp13_RS08965
CpCp13_RS09165	CpCp13_RS03160
CpCp13_RS10150	CpCp13_RS00860
CpCp13_RS10090	CpCp13_RS09240
CpCp13_RS04005	CpCp13_RS03565
CpCp13_RS00450	CpCp13_RS00340
CpCp13_RS00145	CpCp13_RS02790
CpCp13_RS05880	CpCp13_RS00660
CpCp13_RS00145	CpCp13_RS09985
CpCp13_RS09725	CpCp13_RS09775
CpCp13_RS00145	CpCp13_RS07350
CpCp13_RS06640	CpCp13_RS08040
CpCp13_RS09405	CpCp13_RS01515
CpCp13_RS00145	CpCp13_RS05745
CpCp13_RS08285	CpCp13_RS04670
CpCp13_RS09605	CpCp13_RS00340
CpCp13_RS07830	CpCp13_RS00660
CpCp13_RS08200	CpCp13_RS05260
CpCp13_RS01180	CpCp13_RS05465
CpCp13_RS00385	CpCp13_RS09720
CpCp13_RS00015	CpCp13_RS03450
CpCp13_RS01470	CpCp13_RS07390
CpCp13_RS06210	CpCp13_RS10785
CpCp13_RS00555	CpCp13_RS03790
CpCp13_RS04665	CpCp13_RS00595
CpCp13_RS00235	CpCp13_RS06150
CpCp13_RS07860	CpCp13_RS05480
CpCp13_RS07695	CpCp13_RS08310
CpCp13_RS07695	CpCp13_RS06005
CpCp13_RS10125	CpCp13_RS08475
CpCp13_RS04000	CpCp13_RS05485
CpCp13_RS08080	CpCp13_RS09905
CpCp13_RS07305	CpCp13_RS01085
CpCp13_RS03755	CpCp13_RS08445
CpCp13_RS10550	CpCp13_RS04375
CpCp13_RS06640	CpCp13_RS03685
CpCp13_RS01030	CpCp13_RS07845
CpCp13_RS09025	CpCp13_RS06455
CpCp13_RS01030	CpCp13_RS07570
CpCp13_RS05470	CpCp13_RS10260
CpCp13_RS00450	CpCp13_RS09605
CpCp13_RS00450	CpCp13_RS06110
CpCp13_RS06215	CpCp13_RS03060
CpCp13_RS02665	CpCp13_RS00390
CpCp13_RS07740	CpCp13_RS06250
CpCp13_RS03665	CpCp13_RS01185
CpCp13_RS04495	CpCp13_RS03165
CpCp13_RS08080	CpCp13_RS04245
CpCp13_RS04665	CpCp13_RS05305
CpCp13_RS00915	CpCp13_RS07255
CpCp13_RS04075	CpCp13_RS00820
CpCp13_RS07775	CpCp13_RS03035
CpCp13_RS09165	CpCp13_RS01310
CpCp13_RS03070	CpCp13_RS03370
CpCp13_RS03415	CpCp13_RS08190
CpCp13_RS09960	CpCp13_RS05785
CpCp13_RS09990	CpCp13_RS06595
CpCp13_RS09405	CpCp13_RS08760
CpCp13_RS07535	CpCp13_RS04295
CpCp13_RS08185	CpCp13_RS01025
CpCp13_RS03720	CpCp13_RS02790
CpCp13_RS03720	CpCp13_RS10005
CpCp13_RS03720	CpCp13_RS10635
CpCp13_RS00015	CpCp13_RS08935
CpCp13_RS06770	CpCp13_RS01030
CpCp13_RS01600	CpCp13_RS02800
CpCp13_RS10840	CpCp13_RS05240
CpCp13_RS06060	CpCp13_RS10020
CpCp13_RS01180	CpCp13_RS07070
CpCp13_RS04975	CpCp13_RS10345
CpCp13_RS01495	CpCp13_RS08090
CpCp13_RS01180	CpCp13_RS03370
CpCp13_RS02160	CpCp13_RS00700
CpCp13_RS01180	CpCp13_RS05050
CpCp13_RS08285	CpCp13_RS00065
CpCp13_RS00860	CpCp13_RS00505
CpCp13_RS09405	CpCp13_RS10260
CpCp13_RS00310	CpCp13_RS03755
CpCp13_RS00115	CpCp13_RS00380
CpCp13_RS03070	CpCp13_RS03045
CpCp13_RS00570	CpCp13_RS07095
CpCp13_RS03075	CpCp13_RS06580
CpCp13_RS07830	CpCp13_RS08190
CpCp13_RS06560	CpCp13_RS00700
CpCp13_RS03705	CpCp13_RS00315
CpCp13_RS07830	CpCp13_RS06685
CpCp13_RS01600	CpCp13_RS01320
CpCp13_RS08260	CpCp13_RS07285
CpCp13_RS01225	CpCp13_RS07250
CpCp13_RS01495	CpCp13_RS00060
CpCp13_RS08080	CpCp13_RS06485
CpCp13_RS04005	CpCp13_RS10115
CpCp13_RS04665	CpCp13_RS07900
CpCp13_RS07120	CpCp13_RS07785
CpCp13_RS00145	CpCp13_RS06335
CpCp13_RS03755	CpCp13_RS01945
CpCp13_RS10085	CpCp13_RS07215
CpCp13_RS09165	CpCp13_RS02535
CpCp13_RS00175	CpCp13_RS06045
CpCp13_RS08285	CpCp13_RS00635
CpCp13_RS10455	CpCp13_RS07510
CpCp13_RS04005	CpCp13_RS05465
CpCp13_RS04005	CpCp13_RS08585
CpCp13_RS05755	CpCp13_RS07530
CpCp13_RS08080	CpCp13_RS00630
CpCp13_RS01895	CpCp13_RS03755
CpCp13_RS03685	CpCp13_RS08235
CpCp13_RS06625	CpCp13_RS05700
CpCp13_RS09990	CpCp13_RS00520
CpCp13_RS04665	CpCp13_RS07605
CpCp13_RS10250	CpCp13_RS09930
CpCp13_RS00210	CpCp13_RS10645
CpCp13_RS03070	CpCp13_RS00370
CpCp13_RS03720	CpCp13_RS10890
CpCp13_RS05755	CpCp13_RS07375
CpCp13_RS05755	CpCp13_RS07380
CpCp13_RS00235	CpCp13_RS03455
CpCp13_RS00235	CpCp13_RS09490
CpCp13_RS04075	CpCp13_RS06720
CpCp13_RS01030	CpCp13_RS10005
CpCp13_RS05755	CpCp13_RS06130
CpCp13_RS01030	CpCp13_RS06335
CpCp13_RS09405	CpCp13_RS03090
CpCp13_RS04495	CpCp13_RS05700
CpCp13_RS07535	CpCp13_RS05480
CpCp13_RS00570	CpCp13_RS08865
CpCp13_RS01735	CpCp13_RS10590
CpCp13_RS00570	CpCp13_RS09590
CpCp13_RS07535	CpCp13_RS00630
CpCp13_RS05470	CpCp13_RS01200
CpCp13_RS07535	CpCp13_RS09675
CpCp13_RS07735	CpCp13_RS07195
CpCp13_RS07030	CpCp13_RS05050
CpCp13_RS00915	CpCp13_RS06495
CpCp13_RS04495	CpCp13_RS04145
CpCp13_RS07695	CpCp13_RS06270
CpCp13_RS01885	CpCp13_RS04640
CpCp13_RS07790	CpCp13_RS03680
CpCp13_RS07695	CpCp13_RS02080
CpCp13_RS04000	CpCp13_RS07320
CpCp13_RS08870	CpCp13_RS08845
CpCp13_RS05880	CpCp13_RS00585
CpCp13_RS01030	CpCp13_RS04425
CpCp13_RS09405	CpCp13_RS05170
CpCp13_RS04495	CpCp13_RS03250
CpCp13_RS07465	CpCp13_RS04230
CpCp13_RS07735	CpCp13_RS07130
CpCp13_RS00145	CpCp13_RS10530
CpCp13_RS06425	CpCp13_RS05910
CpCp13_RS08080	CpCp13_RS02265
CpCp13_RS01030	CpCp13_RS04285
CpCp13_RS09405	CpCp13_RS05820
CpCp13_RS10090	CpCp13_RS00445
CpCp13_RS07030	CpCp13_RS09770
CpCp13_RS03070	CpCp13_RS09425
CpCp13_RS09355	CpCp13_RS09970
CpCp13_RS05775	CpCp13_RS01330
CpCp13_RS05215	CpCp13_RS08835
CpCp13_RS10470	CpCp13_RS00370
CpCp13_RS02965	CpCp13_RS04470
CpCp13_RS03515	CpCp13_RS00755
CpCp13_RS02965	CpCp13_RS10675
CpCp13_RS06435	CpCp13_RS02400
CpCp13_RS02260	CpCp13_RS08570
CpCp13_RS03665	CpCp13_RS04600
CpCp13_RS00235	CpCp13_RS09810
CpCp13_RS09355	CpCp13_RS01205
CpCp13_RS08080	CpCp13_RS04010
CpCp13_RS07030	CpCp13_RS10740
CpCp13_RS02365	CpCp13_RS05115
CpCp13_RS09165	CpCp13_RS10735
CpCp13_RS08080	CpCp13_RS10740
CpCp13_RS04345	CpCp13_RS04295
CpCp13_RS07695	CpCp13_RS00855
CpCp13_RS09405	CpCp13_RS05485
CpCp13_RS07830	CpCp13_RS10200
CpCp13_RS07645	CpCp13_RS07385
CpCp13_RS00915	CpCp13_RS09665
CpCp13_RS00145	CpCp13_RS09270
CpCp13_RS00145	CpCp13_RS04135
CpCp13_RS09415	CpCp13_RS00805
CpCp13_RS04665	CpCp13_RS02580
CpCp13_RS00115	CpCp13_RS09455
CpCp13_RS07790	CpCp13_RS07445
CpCp13_RS00210	CpCp13_RS04720
CpCp13_RS09960	CpCp13_RS05795
CpCp13_RS00860	CpCp13_RS06125
CpCp13_RS10795	CpCp13_RS02930
CpCp13_RS03415	CpCp13_RS05560
CpCp13_RS06060	CpCp13_RS00450
CpCp13_RS00450	CpCp13_RS06060
CpCp13_RS03490	CpCp13_RS09305
CpCp13_RS01580	CpCp13_RS03530
CpCp13_RS07640	CpCp13_RS06235
CpCp13_RS04005	CpCp13_RS10740
CpCp13_RS00450	CpCp13_RS01175
CpCp13_RS09025	CpCp13_RS02320
CpCp13_RS05240	CpCp13_RS03835
CpCp13_RS05880	CpCp13_RS09500
CpCp13_RS08605	CpCp13_RS09530
CpCp13_RS03860	CpCp13_RS02070
CpCp13_RS04005	CpCp13_RS01515
CpCp13_RS04005	CpCp13_RS00875
CpCp13_RS07305	CpCp13_RS01605
CpCp13_RS04975	CpCp13_RS08880
CpCp13_RS03490	CpCp13_RS10545
CpCp13_RS01030	CpCp13_RS02280
CpCp13_RS03720	CpCp13_RS10430
CpCp13_RS06875	CpCp13_RS10515
CpCp13_RS10405	CpCp13_RS03725
CpCp13_RS03515	CpCp13_RS10345
CpCp13_RS05990	CpCp13_RS01450
CpCp13_RS09725	CpCp13_RS04965
CpCp13_RS05880	CpCp13_RS07380
CpCp13_RS07030	CpCp13_RS01515
CpCp13_RS06210	CpCp13_RS08200
CpCp13_RS03920	CpCp13_RS02910
CpCp13_RS00265	CpCp13_RS08370
CpCp13_RS03720	CpCp13_RS03785
CpCp13_RS07465	CpCp13_RS01540
CpCp13_RS04000	CpCp13_RS09905
CpCp13_RS00570	CpCp13_RS01620
CpCp13_RS00180	CpCp13_RS10675
CpCp13_RS09165	CpCp13_RS04250
CpCp13_RS04000	CpCp13_RS08145
CpCp13_RS10685	CpCp13_RS04240
CpCp13_RS04000	CpCp13_RS10390
CpCp13_RS08145	CpCp13_RS04005
CpCp13_RS09165	CpCp13_RS03050
CpCp13_RS09425	CpCp13_RS05420
CpCp13_RS10085	CpCp13_RS00310
CpCp13_RS10685	CpCp13_RS08475
CpCp13_RS04730	CpCp13_RS05970
CpCp13_RS03980	CpCp13_RS01395
CpCp13_RS00180	CpCp13_RS10030
CpCp13_RS04530	CpCp13_RS03745
CpCp13_RS02740	CpCp13_RS06775
CpCp13_RS09165	CpCp13_RS03275
CpCp13_RS04530	CpCp13_RS01670
CpCp13_RS07790	CpCp13_RS05735
CpCp13_RS07030	CpCp13_RS08340
CpCp13_RS06870	CpCp13_RS08345
CpCp13_RS03970	CpCp13_RS08820
CpCp13_RS07030	CpCp13_RS08585
CpCp13_RS07305	CpCp13_RS01615
CpCp13_RS05880	CpCp13_RS05755
CpCp13_RS00360	CpCp13_RS00950
CpCp13_RS00360	CpCp13_RS10255
CpCp13_RS00795	CpCp13_RS08370
CpCp13_RS01180	CpCp13_RS03565
CpCp13_RS01030	CpCp13_RS05050
CpCp13_RS01030	CpCp13_RS02790
CpCp13_RS00450	CpCp13_RS05095
CpCp13_RS00450	CpCp13_RS01740
CpCp13_RS00450	CpCp13_RS08730
CpCp13_RS03720	CpCp13_RS05650
CpCp13_RS00860	CpCp13_RS08590
CpCp13_RS02895	CpCp13_RS01530
CpCp13_RS06625	CpCp13_RS05135
CpCp13_RS09275	CpCp13_RS09810
CpCp13_RS08080	CpCp13_RS07995
CpCp13_RS03075	CpCp13_RS04010
CpCp13_RS03755	CpCp13_RS07255
CpCp13_RS09405	CpCp13_RS00070
CpCp13_RS01030	CpCp13_RS05030
CpCp13_RS00915	CpCp13_RS08445
CpCp13_RS06435	CpCp13_RS09470
CpCp13_RS08200	CpCp13_RS01135
CpCp13_RS01225	CpCp13_RS04120
CpCp13_RS05215	CpCp13_RS07450
CpCp13_RS09990	CpCp13_RS03230
CpCp13_RS03020	CpCp13_RS00550
CpCp13_RS02365	CpCp13_RS03850
CpCp13_RS02365	CpCp13_RS05585
CpCp13_RS03665	CpCp13_RS02085
CpCp13_RS07465	CpCp13_RS05230
CpCp13_RS00145	CpCp13_RS02255
CpCp13_RS04495	CpCp13_RS09795
CpCp13_RS02965	CpCp13_RS04480
CpCp13_RS01725	CpCp13_RS05185
CpCp13_RS04120	CpCp13_RS08335
CpCp13_RS04665	CpCp13_RS09530
CpCp13_RS04665	CpCp13_RS07830
CpCp13_RS00145	CpCp13_RS05455
CpCp13_RS10150	CpCp13_RS02490
CpCp13_RS04665	CpCp13_RS00585
CpCp13_RS10455	CpCp13_RS04190
CpCp13_RS02500	CpCp13_RS09210
CpCp13_RS04665	CpCp13_RS05025
CpCp13_RS05990	CpCp13_RS00085
CpCp13_RS07535	CpCp13_RS02205
CpCp13_RS05710	CpCp13_RS04605
CpCp13_RS10405	CpCp13_RS04110
CpCp13_RS09025	CpCp13_RS00880
CpCp13_RS07535	CpCp13_RS06485
CpCp13_RS00570	CpCp13_RS01615
CpCp13_RS02665	CpCp13_RS02450
CpCp13_RS07535	CpCp13_RS06285
CpCp13_RS01600	CpCp13_RS10465
CpCp13_RS01205	CpCp13_RS08250
CpCp13_RS04515	CpCp13_RS03255
CpCp13_RS00235	CpCp13_RS05100
CpCp13_RS03755	CpCp13_RS08190
CpCp13_RS03705	CpCp13_RS02160
CpCp13_RS04515	CpCp13_RS09915
CpCp13_RS03720	CpCp13_RS05370
CpCp13_RS03960	CpCp13_RS04970
CpCp13_RS04550	CpCp13_RS05970
CpCp13_RS06210	CpCp13_RS10755
CpCp13_RS04005	CpCp13_RS03185
CpCp13_RS00795	CpCp13_RS00290
CpCp13_RS06640	CpCp13_RS03610
CpCp13_RS00145	CpCp13_RS03370
CpCp13_RS06450	CpCp13_RS06610
CpCp13_RS10405	CpCp13_RS00145
CpCp13_RS02965	CpCp13_RS10030
CpCp13_RS07830	CpCp13_RS00585
CpCp13_RS00235	CpCp13_RS06475
CpCp13_RS01030	CpCp13_RS05095
CpCp13_RS02340	CpCp13_RS08480
CpCp13_RS00145	CpCp13_RS09045
CpCp13_RS05755	CpCp13_RS06740
CpCp13_RS00235	CpCp13_RS05525
CpCp13_RS02210	CpCp13_RS05465
CpCp13_RS07740	CpCp13_RS10050
CpCp13_RS09725	CpCp13_RS00930
CpCp13_RS03075	CpCp13_RS09420
CpCp13_RS03075	CpCp13_RS09805
CpCp13_RS03420	CpCp13_RS03075
CpCp13_RS08200	CpCp13_RS00670
CpCp13_RS03420	CpCp13_RS02215
CpCp13_RS03070	CpCp13_RS05040
CpCp13_RS01180	CpCp13_RS08760
CpCp13_RS01720	CpCp13_RS08880
CpCp13_RS02665	CpCp13_RS08805
CpCp13_RS10405	CpCp13_RS09905
CpCp13_RS00795	CpCp13_RS08710
CpCp13_RS03070	CpCp13_RS10405
CpCp13_RS00860	CpCp13_RS09080
CpCp13_RS09025	CpCp13_RS09755
CpCp13_RS07645	CpCp13_RS06000
CpCp13_RS10250	CpCp13_RS04520
CpCp13_RS04975	CpCp13_RS03515
CpCp13_RS03865	CpCp13_RS02600
CpCp13_RS00860	CpCp13_RS02410
CpCp13_RS07425	CpCp13_RS03640
CpCp13_RS08860	CpCp13_RS01685
CpCp13_RS01030	CpCp13_RS05740
CpCp13_RS09875	CpCp13_RS04505
CpCp13_RS03685	CpCp13_RS06770
CpCp13_RS07030	CpCp13_RS02210
CpCp13_RS07535	CpCp13_RS07340
CpCp13_RS00570	CpCp13_RS06235
CpCp13_RS05775	CpCp13_RS02620
CpCp13_RS09530	CpCp13_RS07685
CpCp13_RS01885	CpCp13_RS09330
CpCp13_RS05645	CpCp13_RS02470
CpCp13_RS00860	CpCp13_RS09620
CpCp13_RS07030	CpCp13_RS09040
CpCp13_RS01885	CpCp13_RS10350
CpCp13_RS04000	CpCp13_RS02275
CpCp13_RS04975	CpCp13_RS03080
CpCp13_RS09025	CpCp13_RS05930
CpCp13_RS02365	CpCp13_RS05290
CpCp13_RS06770	CpCp13_RS06640
CpCp13_RS04665	CpCp13_RS02420
CpCp13_RS09765	CpCp13_RS01525
CpCp13_RS00145	CpCp13_RS10010
CpCp13_RS04665	CpCp13_RS05010
CpCp13_RS05755	CpCp13_RS00585
CpCp13_RS04665	CpCp13_RS08605
CpCp13_RS01030	CpCp13_RS06530
CpCp13_RS00915	CpCp13_RS00435
CpCp13_RS10150	CpCp13_RS06700
CpCp13_RS00145	CpCp13_RS08760
CpCp13_RS01030	CpCp13_RS05545
CpCp13_RS00145	CpCp13_RS06065
CpCp13_RS08215	CpCp13_RS03525
CpCp13_RS09165	CpCp13_RS06635
CpCp13_RS07465	CpCp13_RS02565
CpCp13_RS00605	CpCp13_RS03980
CpCp13_RS02365	CpCp13_RS01430
CpCp13_RS06640	CpCp13_RS02075
CpCp13_RS03720	CpCp13_RS10395
CpCp13_RS08200	CpCp13_RS06210
CpCp13_RS03720	CpCp13_RS05845
CpCp13_RS00605	CpCp13_RS07540
CpCp13_RS00945	CpCp13_RS08225
CpCp13_RS06640	CpCp13_RS04285
CpCp13_RS03720	CpCp13_RS08040
CpCp13_RS07595	CpCp13_RS04565
CpCp13_RS03755	CpCp13_RS01895
CpCp13_RS00145	CpCp13_RS08490
CpCp13_RS03720	CpCp13_RS09745
CpCp13_RS06875	CpCp13_RS00060
CpCp13_RS04075	CpCp13_RS00910
CpCp13_RS07465	CpCp13_RS05660
CpCp13_RS04075	CpCp13_RS10190
CpCp13_RS08605	CpCp13_RS06755
CpCp13_RS07535	CpCp13_RS01420
CpCp13_RS07030	CpCp13_RS04005
CpCp13_RS03865	CpCp13_RS00340
CpCp13_RS03515	CpCp13_RS05040
CpCp13_RS00310	CpCp13_RS00925
CpCp13_RS00310	CpCp13_RS10645
CpCp13_RS07030	CpCp13_RS08760
CpCp13_RS07425	CpCp13_RS00130
CpCp13_RS07030	CpCp13_RS03370
CpCp13_RS03635	CpCp13_RS00430
CpCp13_RS07695	CpCp13_RS02625
CpCp13_RS02500	CpCp13_RS04465
CpCp13_RS04005	CpCp13_RS05485
CpCp13_RS03665	CpCp13_RS02340
CpCp13_RS09725	CpCp13_RS04340
CpCp13_RS01600	CpCp13_RS07740
CpCp13_RS00080	CpCp13_RS10640
CpCp13_RS01180	CpCp13_RS01175
CpCp13_RS04495	CpCp13_RS03955
CpCp13_RS09725	CpCp13_RS03635
CpCp13_RS01495	CpCp13_RS08410
CpCp13_RS10550	CpCp13_RS07215
CpCp13_RS07305	CpCp13_RS07550
CpCp13_RS03490	CpCp13_RS00940
CpCp13_RS01180	CpCp13_RS07995
CpCp13_RS01180	CpCp13_RS09270
CpCp13_RS05990	CpCp13_RS03085
CpCp13_RS05715	CpCp13_RS03290
CpCp13_RS06450	CpCp13_RS06065
CpCp13_RS06435	CpCp13_RS00440
CpCp13_RS10455	CpCp13_RS07105
CpCp13_RS02365	CpCp13_RS06505
CpCp13_RS04515	CpCp13_RS09570
CpCp13_RS05645	CpCp13_RS02730
CpCp13_RS04665	CpCp13_RS07375
CpCp13_RS02365	CpCp13_RS06960
CpCp13_RS01895	CpCp13_RS06685
CpCp13_RS09025	CpCp13_RS00940
CpCp13_RS04665	CpCp13_RS04265
CpCp13_RS02260	CpCp13_RS05360
CpCp13_RS02665	CpCp13_RS10280
CpCp13_RS08145	CpCp13_RS04000
CpCp13_RS09765	CpCp13_RS08780
CpCp13_RS08080	CpCp13_RS05685
CpCp13_RS01225	CpCp13_RS08335
CpCp13_RS04000	CpCp13_RS10380
CpCp13_RS00370	CpCp13_RS10470
CpCp13_RS00235	CpCp13_RS02535
CpCp13_RS09635	CpCp13_RS01385
CpCp13_RS04665	CpCp13_RS09630
CpCp13_RS01115	CpCp13_RS06545
CpCp13_RS10405	CpCp13_RS02275
CpCp13_RS10455	CpCp13_RS04660
CpCp13_RS02260	CpCp13_RS07090
CpCp13_RS03980	CpCp13_RS06290
CpCp13_RS03755	CpCp13_RS10185
CpCp13_RS03920	CpCp13_RS04100
CpCp13_RS01030	CpCp13_RS09900
CpCp13_RS04120	CpCp13_RS00440
CpCp13_RS00210	CpCp13_RS08310
CpCp13_RS03685	CpCp13_RS08240
CpCp13_RS01185	CpCp13_RS03665
CpCp13_RS10125	CpCp13_RS09165
CpCp13_RS07075	CpCp13_RS10255
CpCp13_RS04000	CpCp13_RS02210
CpCp13_RS04290	CpCp13_RS02045
CpCp13_RS02365	CpCp13_RS06075
CpCp13_RS00115	CpCp13_RS02915
CpCp13_RS09990	CpCp13_RS06890
CpCp13_RS03755	CpCp13_RS08310
CpCp13_RS05645	CpCp13_RS03910
CpCp13_RS00180	CpCp13_RS04470
CpCp13_RS09960	CpCp13_RS01345
CpCp13_RS01180	CpCp13_RS03095
CpCp13_RS05880	CpCp13_RS09115
CpCp13_RS07640	CpCp13_RS09590
CpCp13_RS03490	CpCp13_RS00210
CpCp13_RS00310	CpCp13_RS00335
CpCp13_RS07120	CpCp13_RS02070
CpCp13_RS04495	CpCp13_RS04700
CpCp13_RS01725	CpCp13_RS03235
CpCp13_RS08870	CpCp13_RS10880
CpCp13_RS05880	CpCp13_RS09335
CpCp13_RS00145	CpCp13_RS04685
CpCp13_RS00145	CpCp13_RS00085
CpCp13_RS09165	CpCp13_RS06270
CpCp13_RS10150	CpCp13_RS10460
CpCp13_RS07860	CpCp13_RS07340
CpCp13_RS00145	CpCp13_RS03720
CpCp13_RS04665	CpCp13_RS00020
CpCp13_RS07075	CpCp13_RS07085
CpCp13_RS00210	CpCp13_RS07765
CpCp13_RS10085	CpCp13_RS07425
CpCp13_RS07830	CpCp13_RS09115
CpCp13_RS10455	CpCp13_RS10520
CpCp13_RS00145	CpCp13_RS05650
CpCp13_RS09765	CpCp13_RS04730
CpCp13_RS09405	CpCp13_RS10020
CpCp13_RS03720	CpCp13_RS04110
CpCp13_RS07695	CpCp13_RS04050
CpCp13_RS10455	CpCp13_RS06245
CpCp13_RS01885	CpCp13_RS07505
CpCp13_RS04005	CpCp13_RS05225
CpCp13_RS06625	CpCp13_RS00150
CpCp13_RS04495	CpCp13_RS05675
CpCp13_RS05755	CpCp13_RS07385
CpCp13_RS05645	CpCp13_RS08210
CpCp13_RS04515	CpCp13_RS09780
CpCp13_RS04515	CpCp13_RS07985
CpCp13_RS00360	CpCp13_RS07080
CpCp13_RS03070	CpCp13_RS09270
CpCp13_RS00570	CpCp13_RS08320
CpCp13_RS04005	CpCp13_RS07325
CpCp13_RS03830	CpCp13_RS06470
CpCp13_RS01440	CpCp13_RS05185
CpCp13_RS09415	CpCp13_RS01820
CpCp13_RS08575	CpCp13_RS00470
CpCp13_RS06435	CpCp13_RS01240
CpCp13_RS03705	CpCp13_RS08045
CpCp13_RS00860	CpCp13_RS09990
CpCp13_RS01020	CpCp13_RS06260
CpCp13_RS05645	CpCp13_RS09000
CpCp13_RS07030	CpCp13_RS00625
CpCp13_RS03860	CpCp13_RS01605
CpCp13_RS01205	CpCp13_RS01440
CpCp13_RS03420	CpCp13_RS07945
CpCp13_RS02260	CpCp13_RS03370
CpCp13_RS01180	CpCp13_RS00405
CpCp13_RS08160	CpCp13_RS08715
CpCp13_RS04345	CpCp13_RS07995
CpCp13_RS02260	CpCp13_RS05500
CpCp13_RS03665	CpCp13_RS03070
CpCp13_RS03980	CpCp13_RS02205
CpCp13_RS09725	CpCp13_RS03360
CpCp13_RS01180	CpCp13_RS10390
CpCp13_RS05130	CpCp13_RS09475
CpCp13_RS09725	CpCp13_RS04845
CpCp13_RS00570	CpCp13_RS09840
CpCp13_RS08190	CpCp13_RS01040
CpCp13_RS07535	CpCp13_RS03850
CpCp13_RS07535	CpCp13_RS02405
CpCp13_RS10085	CpCp13_RS09320
CpCp13_RS02075	CpCp13_RS02280
CpCp13_RS10085	CpCp13_RS02505
CpCp13_RS07030	CpCp13_RS05455
CpCp13_RS05010	CpCp13_RS06600
CpCp13_RS07465	CpCp13_RS09355
CpCp13_RS08860	CpCp13_RS04005
CpCp13_RS00875	CpCp13_RS05450
CpCp13_RS08860	CpCp13_RS08505
CpCp13_RS07030	CpCp13_RS01455
CpCp13_RS06875	CpCp13_RS02330
CpCp13_RS09425	CpCp13_RS05500
CpCp13_RS08605	CpCp13_RS09510
CpCp13_RS05645	CpCp13_RS03650
CpCp13_RS00860	CpCp13_RS08780
CpCp13_RS00145	CpCp13_RS00070
CpCp13_RS05880	CpCp13_RS03445
CpCp13_RS02365	CpCp13_RS07515
CpCp13_RS08190	CpCp13_RS09665
CpCp13_RS00015	CpCp13_RS00225
CpCp13_RS04005	CpCp13_RS07745
CpCp13_RS06625	CpCp13_RS03320
CpCp13_RS06210	CpCp13_RS01670
CpCp13_RS05285	CpCp13_RS06485
CpCp13_RS02895	CpCp13_RS00690
CpCp13_RS03070	CpCp13_RS00350
CpCp13_RS04515	CpCp13_RS03585
CpCp13_RS04515	CpCp13_RS01885
CpCp13_RS03720	CpCp13_RS01455
CpCp13_RS03070	CpCp13_RS09905
CpCp13_RS05770	CpCp13_RS05270
CpCp13_RS05755	CpCp13_RS02145
CpCp13_RS02965	CpCp13_RS10020
CpCp13_RS03720	CpCp13_RS05220
CpCp13_RS08575	CpCp13_RS03335
CpCp13_RS10405	CpCp13_RS05095
CpCp13_RS01475	CpCp13_RS00510
CpCp13_RS04940	CpCp13_RS09610
CpCp13_RS10795	CpCp13_RS04560
CpCp13_RS00860	CpCp13_RS06625
CpCp13_RS00860	CpCp13_RS02965
CpCp13_RS06625	CpCp13_RS09415
CpCp13_RS00280	CpCp13_RS07025
CpCp13_RS08590	CpCp13_RS00460
CpCp13_RS01225	CpCp13_RS04105
CpCp13_RS05880	CpCp13_RS08360
CpCp13_RS05880	CpCp13_RS08315
CpCp13_RS03145	CpCp13_RS02165
CpCp13_RS07075	CpCp13_RS00570
CpCp13_RS00145	CpCp13_RS01515
CpCp13_RS00145	CpCp13_RS01445
CpCp13_RS09765	CpCp13_RS00590
CpCp13_RS03155	CpCp13_RS04080
CpCp13_RS09405	CpCp13_RS05465
CpCp13_RS05715	CpCp13_RS05000
CpCp13_RS00795	CpCp13_RS03615
CpCp13_RS01180	CpCp13_RS10115
CpCp13_RS08285	CpCp13_RS05365
CpCp13_RS00145	CpCp13_RS03560
CpCp13_RS00115	CpCp13_RS03710
CpCp13_RS01180	CpCp13_RS02270
CpCp13_RS00115	CpCp13_RS02975
CpCp13_RS01180	CpCp13_RS02265
CpCp13_RS03440	CpCp13_RS01105
CpCp13_RS01180	CpCp13_RS06410
CpCp13_RS01180	CpCp13_RS03995
CpCp13_RS09275	CpCp13_RS09800
CpCp13_RS07030	CpCp13_RS10530
CpCp13_RS09405	CpCp13_RS04000
CpCp13_RS01030	CpCp13_RS07065
CpCp13_RS02260	CpCp13_RS04000
CpCp13_RS07425	CpCp13_RS10085
CpCp13_RS08080	CpCp13_RS07570
CpCp13_RS05215	CpCp13_RS10025
CpCp13_RS03865	CpCp13_RS05190
CpCp13_RS08080	CpCp13_RS03565
CpCp13_RS07645	CpCp13_RS07285
CpCp13_RS02760	CpCp13_RS02060
CpCp13_RS01030	CpCp13_RS03720
CpCp13_RS07735	CpCp13_RS00970
CpCp13_RS07735	CpCp13_RS10275
CpCp13_RS03705	CpCp13_RS07255
CpCp13_RS01570	CpCp13_RS01560
CpCp13_RS00915	CpCp13_RS09315
CpCp13_RS08080	CpCp13_RS09040
CpCp13_RS06640	CpCp13_RS03435
CpCp13_RS06640	CpCp13_RS05155
CpCp13_RS09025	CpCp13_RS00515
CpCp13_RS07695	CpCp13_RS09140
CpCp13_RS04495	CpCp13_RS02015
CpCp13_RS07695	CpCp13_RS03325
CpCp13_RS03020	CpCp13_RS08860
CpCp13_RS02340	CpCp13_RS03665
CpCp13_RS01895	CpCp13_RS02820
CpCp13_RS04000	CpCp13_RS09835
CpCp13_RS01725	CpCp13_RS00190
CpCp13_RS04000	CpCp13_RS02255
CpCp13_RS08080	CpCp13_RS04480
CpCp13_RS01030	CpCp13_RS04140
CpCp13_RS01115	CpCp13_RS00270
CpCp13_RS03635	CpCp13_RS00200
CpCp13_RS04495	CpCp13_RS09745
CpCp13_RS03755	CpCp13_RS07765
CpCp13_RS09415	CpCp13_RS01255
CpCp13_RS04000	CpCp13_RS05465
CpCp13_RS07860	CpCp13_RS07700
CpCp13_RS02310	CpCp13_RS01740
CpCp13_RS08795	CpCp13_RS10785
CpCp13_RS02340	CpCp13_RS03575
CpCp13_RS08215	CpCp13_RS00685
CpCp13_RS07075	CpCp13_RS00620
CpCp13_RS05460	CpCp13_RS05915
CpCp13_RS06100	CpCp13_RS10430
CpCp13_RS10035	CpCp13_RS08600
CpCp13_RS00360	CpCp13_RS02380
CpCp13_RS07830	CpCp13_RS00290
CpCp13_RS01580	CpCp13_RS09570
CpCp13_RS02365	CpCp13_RS09710
CpCp13_RS02310	CpCp13_RS08295
CpCp13_RS03020	CpCp13_RS05210
CpCp13_RS03720	CpCp13_RS06530
CpCp13_RS09165	CpCp13_RS05860
CpCp13_RS05755	CpCp13_RS09965
CpCp13_RS08080	CpCp13_RS02210
CpCp13_RS01115	CpCp13_RS08475
CpCp13_RS09165	CpCp13_RS03325
CpCp13_RS10030	CpCp13_RS10020
CpCp13_RS00115	CpCp13_RS04240
CpCp13_RS02260	CpCp13_RS02265
CpCp13_RS05390	CpCp13_RS00420
CpCp13_RS07830	CpCp13_RS05755
CpCp13_RS07735	CpCp13_RS00245
CpCp13_RS00235	CpCp13_RS02110
CpCp13_RS06625	CpCp13_RS04145
CpCp13_RS01575	CpCp13_RS10675
CpCp13_RS10840	CpCp13_RS07005
CpCp13_RS03020	CpCp13_RS04000
CpCp13_RS10035	CpCp13_RS01285
CpCp13_RS00145	CpCp13_RS08480
CpCp13_RS09725	CpCp13_RS03385
CpCp13_RS00015	CpCp13_RS06820
CpCp13_RS01480	CpCp13_RS09630
CpCp13_RS06400	CpCp13_RS00665
CpCp13_RS03910	CpCp13_RS09000
CpCp13_RS03960	CpCp13_RS07640
CpCp13_RS04495	CpCp13_RS03670
CpCp13_RS01895	CpCp13_RS00890
CpCp13_RS00915	CpCp13_RS07655
CpCp13_RS09725	CpCp13_RS01380
CpCp13_RS09405	CpCp13_RS03095
CpCp13_RS07075	CpCp13_RS04110
CpCp13_RS04005	CpCp13_RS05495
CpCp13_RS00145	CpCp13_RS04245
CpCp13_RS03155	CpCp13_RS01345
CpCp13_RS01225	CpCp13_RS05380
CpCp13_RS07695	CpCp13_RS09115
CpCp13_RS04000	CpCp13_RS04005
CpCp13_RS03755	CpCp13_RS03645
CpCp13_RS08360	CpCp13_RS02580
CpCp13_RS01030	CpCp13_RS05060
CpCp13_RS03070	CpCp13_RS04425
CpCp13_RS09165	CpCp13_RS06545
CpCp13_RS00875	CpCp13_RS05495
CpCp13_RS00310	CpCp13_RS10200
CpCp13_RS06875	CpCp13_RS04620
CpCp13_RS02160	CpCp13_RS06765
CpCp13_RS09025	CpCp13_RS05100
CpCp13_RS08200	CpCp13_RS03900
CpCp13_RS07640	CpCp13_RS05195
CpCp13_RS07545	CpCp13_RS09500
CpCp13_RS09635	CpCp13_RS03890
CpCp13_RS03705	CpCp13_RS07775
CpCp13_RS00570	CpCp13_RS01610
CpCp13_RS03830	CpCp13_RS03655
CpCp13_RS07535	CpCp13_RS03585
CpCp13_RS05780	CpCp13_RS01405
CpCp13_RS00180	CpCp13_RS00860
CpCp13_RS08200	CpCp13_RS10310
CpCp13_RS04940	CpCp13_RS10685
CpCp13_RS10405	CpCp13_RS09425
CpCp13_RS00860	CpCp13_RS10280
CpCp13_RS09025	CpCp13_RS07345
CpCp13_RS09025	CpCp13_RS07610
CpCp13_RS00605	CpCp13_RS01475
CpCp13_RS04515	CpCp13_RS00065
CpCp13_RS08605	CpCp13_RS05025
CpCp13_RS01720	CpCp13_RS08075
CpCp13_RS07465	CpCp13_RS08275
CpCp13_RS10260	CpCp13_RS00450
CpCp13_RS00450	CpCp13_RS08380
CpCp13_RS08225	CpCp13_RS01325
CpCp13_RS03020	CpCp13_RS10115
CpCp13_RS07465	CpCp13_RS06800
CpCp13_RS07465	CpCp13_RS01490
CpCp13_RS00210	CpCp13_RS03645
CpCp13_RS04515	CpCp13_RS02405
CpCp13_RS06640	CpCp13_RS07575
CpCp13_RS07595	CpCp13_RS09660
CpCp13_RS08200	CpCp13_RS00135
CpCp13_RS10260	CpCp13_RS01445
CpCp13_RS09025	CpCp13_RS02745
CpCp13_RS05755	CpCp13_RS00435
CpCp13_RS09025	CpCp13_RS01430
CpCp13_RS04730	CpCp13_RS03890
CpCp13_RS04515	CpCp13_RS02320
CpCp13_RS08080	CpCp13_RS00410
CpCp13_RS06060	CpCp13_RS03795
CpCp13_RS10455	CpCp13_RS01525
CpCp13_RS03665	CpCp13_RS00370
CpCp13_RS10795	CpCp13_RS01525
CpCp13_RS05780	CpCp13_RS10850
CpCp13_RS06790	CpCp13_RS08155
CpCp13_RS07305	CpCp13_RS07735
CpCp13_RS02340	CpCp13_RS02120
CpCp13_RS08360	CpCp13_RS05140
CpCp13_RS03415	CpCp13_RS10085
CpCp13_RS09910	CpCp13_RS03065
CpCp13_RS03415	CpCp13_RS02045
CpCp13_RS03665	CpCp13_RS10470
CpCp13_RS10470	CpCp13_RS03045
CpCp13_RS00115	CpCp13_RS10595
CpCp13_RS07545	CpCp13_RS09070
CpCp13_RS10405	CpCp13_RS07065
CpCp13_RS02260	CpCp13_RS04105
CpCp13_RS06435	CpCp13_RS04380
CpCp13_RS06210	CpCp13_RS06730
CpCp13_RS03720	CpCp13_RS10405
CpCp13_RS01030	CpCp13_RS03715
CpCp13_RS03580	CpCp13_RS02435
CpCp13_RS09275	CpCp13_RS03875
CpCp13_RS03580	CpCp13_RS00520
CpCp13_RS01600	CpCp13_RS07120
CpCp13_RS01895	CpCp13_RS00955
CpCp13_RS01030	CpCp13_RS01450
CpCp13_RS04735	CpCp13_RS05140
CpCp13_RS05975	CpCp13_RS04985
CpCp13_RS06640	CpCp13_RS09045
CpCp13_RS00385	CpCp13_RS02050
CpCp13_RS03720	CpCp13_RS04285
CpCp13_RS03720	CpCp13_RS05725
CpCp13_RS01205	CpCp13_RS00685
CpCp13_RS03070	CpCp13_RS00405
CpCp13_RS05790	CpCp13_RS00630
CpCp13_RS00860	CpCp13_RS10860
CpCp13_RS10405	CpCp13_RS01515
CpCp13_RS04495	CpCp13_RS05185
CpCp13_RS00115	CpCp13_RS10125
CpCp13_RS00915	CpCp13_RS01040
CpCp13_RS00210	CpCp13_RS10200
CpCp13_RS02365	CpCp13_RS09945
CpCp13_RS09165	CpCp13_RS02400
CpCp13_RS00915	CpCp13_RS07110
CpCp13_RS06230	CpCp13_RS06715
CpCp13_RS09165	CpCp13_RS01315
CpCp13_RS08215	CpCp13_RS02425
CpCp13_RS08215	CpCp13_RS09830
CpCp13_RS10150	CpCp13_RS03080
CpCp13_RS10550	CpCp13_RS10085
CpCp13_RS00145	CpCp13_RS04895
CpCp13_RS10550	CpCp13_RS00310
CpCp13_RS00915	CpCp13_RS06200
CpCp13_RS09405	CpCp13_RS05490
CpCp13_RS07075	CpCp13_RS04115
CpCp13_RS07045	CpCp13_RS08170
CpCp13_RS07645	CpCp13_RS07855
CpCp13_RS10085	CpCp13_RS06200
CpCp13_RS10085	CpCp13_RS04750
CpCp13_RS07645	CpCp13_RS07620
CpCp13_RS06425	CpCp13_RS04375
CpCp13_RS07775	CpCp13_RS09440
CpCp13_RS10125	CpCp13_RS00130
CpCp13_RS01185	CpCp13_RS02085
CpCp13_RS09530	CpCp13_RS01485
CpCp13_RS09530	CpCp13_RS09630
CpCp13_RS05010	CpCp13_RS07460
CpCp13_RS05010	CpCp13_RS05835
CpCp13_RS09415	CpCp13_RS05060
CpCp13_RS07535	CpCp13_RS02220
CpCp13_RS05355	CpCp13_RS10550
CpCp13_RS00875	CpCp13_RS05810
CpCp13_RS07645	CpCp13_RS01935
CpCp13_RS02365	CpCp13_RS05510
CpCp13_RS03865	CpCp13_RS05915
CpCp13_RS10150	CpCp13_RS05750
CpCp13_RS01030	CpCp13_RS03435
CpCp13_RS04495	CpCp13_RS00045
CpCp13_RS04615	CpCp13_RS05820
CpCp13_RS00145	CpCp13_RS02270
CpCp13_RS00795	CpCp13_RS09790
CpCp13_RS07730	CpCp13_RS02800
CpCp13_RS02495	CpCp13_RS01405
CpCp13_RS08080	CpCp13_RS06865
CpCp13_RS00795	CpCp13_RS04705
CpCp13_RS04495	CpCp13_RS03235
CpCp13_RS01725	CpCp13_RS03935
CpCp13_RS10455	CpCp13_RS08355
CpCp13_RS00145	CpCp13_RS02265
CpCp13_RS01180	CpCp13_RS04425
CpCp13_RS05715	CpCp13_RS00595
CpCp13_RS01180	CpCp13_RS08570
CpCp13_RS03665	CpCp13_RS08235
CpCp13_RS02965	CpCp13_RS08290
CpCp13_RS01495	CpCp13_RS00475
CpCp13_RS08080	CpCp13_RS03785
CpCp13_RS04615	CpCp13_RS10285
CpCp13_RS01465	CpCp13_RS08375
CpCp13_RS04515	CpCp13_RS09065
CpCp13_RS09425	CpCp13_RS02340
CpCp13_RS03070	CpCp13_RS02270
CpCp13_RS07830	CpCp13_RS07385
CpCp13_RS08145	CpCp13_RS08505
CpCp13_RS10405	CpCp13_RS07480
CpCp13_RS03980	CpCp13_RS04930
CpCp13_RS04000	CpCp13_RS10405
CpCp13_RS08145	CpCp13_RS08860
CpCp13_RS03980	CpCp13_RS09810
CpCp13_RS04000	CpCp13_RS08080
CpCp13_RS02210	CpCp13_RS03785
CpCp13_RS08080	CpCp13_RS07480
CpCp13_RS03070	CpCp13_RS10530
CpCp13_RS03755	CpCp13_RS07755
CpCp13_RS01030	CpCp13_RS05720
CpCp13_RS10455	CpCp13_RS10440
CpCp13_RS04000	CpCp13_RS10740
CpCp13_RS00460	CpCp13_RS03530
CpCp13_RS10125	CpCp13_RS06175
CpCp13_RS09530	CpCp13_RS00245
CpCp13_RS09530	CpCp13_RS04665
CpCp13_RS07830	CpCp13_RS00210
CpCp13_RS03070	CpCp13_RS06335
CpCp13_RS05060	CpCp13_RS08785
CpCp13_RS10455	CpCp13_RS01705
CpCp13_RS10455	CpCp13_RS00045
CpCp13_RS09825	CpCp13_RS09890
CpCp13_RS10685	CpCp13_RS06545
CpCp13_RS01610	CpCp13_RS02295
CpCp13_RS05645	CpCp13_RS06890
CpCp13_RS01030	CpCp13_RS07315
CpCp13_RS06100	CpCp13_RS02790
CpCp13_RS08645	CpCp13_RS01655
CpCp13_RS02365	CpCp13_RS09755
CpCp13_RS06625	CpCp13_RS05030
CpCp13_RS10405	CpCp13_RS03370
CpCp13_RS09165	CpCp13_RS01540
CpCp13_RS00280	CpCp13_RS01325
CpCp13_RS08080	CpCp13_RS02285
CpCp13_RS02260	CpCp13_RS06785
CpCp13_RS02260	CpCp13_RS05380
CpCp13_RS02260	CpCp13_RS08860
CpCp13_RS03420	CpCp13_RS06030
CpCp13_RS09165	CpCp13_RS06775
CpCp13_RS02665	CpCp13_RS10350
CpCp13_RS10405	CpCp13_RS05500
CpCp13_RS06855	CpCp13_RS02275
CpCp13_RS07740	CpCp13_RS08440
CpCp13_RS08590	CpCp13_RS10145
CpCp13_RS09355	CpCp13_RS05000
CpCp13_RS09355	CpCp13_RS04435
CpCp13_RS03020	CpCp13_RS06805
CpCp13_RS02260	CpCp13_RS04110
CpCp13_RS03755	CpCp13_RS04575
CpCp13_RS05710	CpCp13_RS01050
CpCp13_RS04730	CpCp13_RS06595
CpCp13_RS10085	CpCp13_RS01355
CpCp13_RS00960	CpCp13_RS08905
CpCp13_RS04730	CpCp13_RS03410
CpCp13_RS10405	CpCp13_RS05465
CpCp13_RS03755	CpCp13_RS03885
CpCp13_RS10085	CpCp13_RS10735
CpCp13_RS10090	CpCp13_RS05200
CpCp13_RS02210	CpCp13_RS10530
CpCp13_RS01125	CpCp13_RS10435
CpCp13_RS06100	CpCp13_RS05690
CpCp13_RS00235	CpCp13_RS07975
CpCp13_RS09960	CpCp13_RS03155
CpCp13_RS04665	CpCp13_RS00290
CpCp13_RS01580	CpCp13_RS07485
CpCp13_RS03070	CpCp13_RS05095
CpCp13_RS09165	CpCp13_RS03815
CpCp13_RS07030	CpCp13_RS10635
CpCp13_RS00860	CpCp13_RS03055
CpCp13_RS01495	CpCp13_RS10595
CpCp13_RS03515	CpCp13_RS05065
CpCp13_RS07695	CpCp13_RS06985
CpCp13_RS10670	CpCp13_RS00040
CpCp13_RS00145	CpCp13_RS05505
CpCp13_RS02500	CpCp13_RS08255
CpCp13_RS07735	CpCp13_RS09790
CpCp13_RS04000	CpCp13_RS09270
CpCp13_RS04615	CpCp13_RS07440
CpCp13_RS05715	CpCp13_RS05025
CpCp13_RS05715	CpCp13_RS08475
CpCp13_RS00145	CpCp13_RS09900
CpCp13_RS07120	CpCp13_RS01600
CpCp13_RS01180	CpCp13_RS07075
CpCp13_RS00630	CpCp13_RS04345
CpCp13_RS09725	CpCp13_RS10145
CpCp13_RS01180	CpCp13_RS06785
CpCp13_RS09725	CpCp13_RS08560
CpCp13_RS05130	CpCp13_RS07310
CpCp13_RS10035	CpCp13_RS00565
CpCp13_RS09725	CpCp13_RS03540
CpCp13_RS01600	CpCp13_RS02935
CpCp13_RS02340	CpCp13_RS05745
CpCp13_RS09725	CpCp13_RS08330
CpCp13_RS00265	CpCp13_RS03930
CpCp13_RS09725	CpCp13_RS10165
CpCp13_RS06210	CpCp13_RS01465
CpCp13_RS04005	CpCp13_RS00995
CpCp13_RS04005	CpCp13_RS10380
CpCp13_RS08215	CpCp13_RS10235
CpCp13_RS07695	CpCp13_RS09640
CpCp13_RS06810	CpCp13_RS04525
CpCp13_RS00145	CpCp13_RS10405
CpCp13_RS06425	CpCp13_RS10550
CpCp13_RS06425	CpCp13_RS01355
CpCp13_RS07030	CpCp13_RS02270
CpCp13_RS05010	CpCp13_RS00290
CpCp13_RS05010	CpCp13_RS07190
CpCp13_RS01885	CpCp13_RS02770
CpCp13_RS07425	CpCp13_RS00310
CpCp13_RS00875	CpCp13_RS03795
CpCp13_RS08485	CpCp13_RS08070
CpCp13_RS08870	CpCp13_RS03820
CpCp13_RS03865	CpCp13_RS04730
CpCp13_RS00875	CpCp13_RS01455
CpCp13_RS06875	CpCp13_RS08410
CpCp13_RS07535	CpCp13_RS09820
CpCp13_RS00875	CpCp13_RS09770
CpCp13_RS07645	CpCp13_RS06945
CpCp13_RS04975	CpCp13_RS05460
CpCp13_RS08605	CpCp13_RS06730
CpCp13_RS04530	CpCp13_RS00765
CpCp13_RS04975	CpCp13_RS10020
CpCp13_RS04530	CpCp13_RS09220
CpCp13_RS07695	CpCp13_RS10545
CpCp13_RS10550	CpCp13_RS02225
CpCp13_RS05250	CpCp13_RS07435
CpCp13_RS07645	CpCp13_RS06755
CpCp13_RS07465	CpCp13_RS06150
CpCp13_RS05880	CpCp13_RS10200
CpCp13_RS06640	CpCp13_RS08240
CpCp13_RS03490	CpCp13_RS07695
CpCp13_RS05755	CpCp13_RS09530
CpCp13_RS10405	CpCp13_RS08025
CpCp13_RS00360	CpCp13_RS05175
CpCp13_RS03415	CpCp13_RS07830
CpCp13_RS00945	CpCp13_RS00280
CpCp13_RS01030	CpCp13_RS09925
CpCp13_RS03415	CpCp13_RS04290
CpCp13_RS03720	CpCp13_RS01925
CpCp13_RS10795	CpCp13_RS00705
CpCp13_RS09025	CpCp13_RS05980
CpCp13_RS03685	CpCp13_RS06640
CpCp13_RS06435	CpCp13_RS00885
CpCp13_RS03720	CpCp13_RS03370
CpCp13_RS08285	CpCp13_RS07535
CpCp13_RS10335	CpCp13_RS09670
CpCp13_RS03720	CpCp13_RS04425
CpCp13_RS08080	CpCp13_RS09815
CpCp13_RS10455	CpCp13_RS07890
CpCp13_RS04560	CpCp13_RS10415
CpCp13_RS08145	CpCp13_RS01515
CpCp13_RS10455	CpCp13_RS01590
CpCp13_RS09635	CpCp13_RS07035
CpCp13_RS04535	CpCp13_RS01105
CpCp13_RS04375	CpCp13_RS06425
CpCp13_RS01030	CpCp13_RS08785
CpCp13_RS08145	CpCp13_RS02265
CpCp13_RS05460	CpCp13_RS08880
CpCp13_RS10085	CpCp13_RS07400
CpCp13_RS08575	CpCp13_RS05010
CpCp13_RS01725	CpCp13_RS05255
CpCp13_RS04665	CpCp13_RS07990
CpCp13_RS02965	CpCp13_RS03795
CpCp13_RS03755	CpCp13_RS04570
CpCp13_RS01570	CpCp13_RS10370
CpCp13_RS07465	CpCp13_RS06935
CpCp13_RS05990	CpCp13_RS09920
CpCp13_RS05240	CpCp13_RS10840
CpCp13_RS09165	CpCp13_RS06170
CpCp13_RS10795	CpCp13_RS03615
CpCp13_RS00145	CpCp13_RS04105
CpCp13_RS10550	CpCp13_RS05355
CpCp13_RS07535	CpCp13_RS05745
CpCp13_RS06790	CpCp13_RS02190
CpCp13_RS06435	CpCp13_RS07250
CpCp13_RS06230	CpCp13_RS10315
CpCp13_RS01030	CpCp13_RS09045
CpCp13_RS02760	CpCp13_RS06425
CpCp13_RS07545	CpCp13_RS10335
CpCp13_RS10795	CpCp13_RS04705
CpCp13_RS01030	CpCp13_RS10405
CpCp13_RS07695	CpCp13_RS03925
CpCp13_RS04345	CpCp13_RS05465
CpCp13_RS03070	CpCp13_RS02280
CpCp13_RS00175	CpCp13_RS04480
CpCp13_RS05755	CpCp13_RS03290
CpCp13_RS09405	CpCp13_RS01050
CpCp13_RS09025	CpCp13_RS02570
CpCp13_RS00210	CpCp13_RS02055
CpCp13_RS07030	CpCp13_RS02255
CpCp13_RS03755	CpCp13_RS10500
CpCp13_RS00915	CpCp13_RS02055
CpCp13_RS08200	CpCp13_RS09660
CpCp13_RS00145	CpCp13_RS05685
CpCp13_RS03865	CpCp13_RS07440
CpCp13_RS10150	CpCp13_RS00505
CpCp13_RS02740	CpCp13_RS03030
CpCp13_RS09990	CpCp13_RS05970
CpCp13_RS01495	CpCp13_RS08135
CpCp13_RS00360	CpCp13_RS00365
CpCp13_RS05120	CpCp13_RS00215
CpCp13_RS09165	CpCp13_RS00115
CpCp13_RS04005	CpCp13_RS07480
CpCp13_RS07535	CpCp13_RS03355
CpCp13_RS06425	CpCp13_RS09140
CpCp13_RS05975	CpCp13_RS00275
CpCp13_RS05975	CpCp13_RS10675
CpCp13_RS00235	CpCp13_RS08690
CpCp13_RS06425	CpCp13_RS02880
CpCp13_RS04975	CpCp13_RS05040
CpCp13_RS01575	CpCp13_RS03040
CpCp13_RS09025	CpCp13_RS04735
CpCp13_RS05790	CpCp13_RS06570
CpCp13_RS04550	CpCp13_RS07360
CpCp13_RS10405	CpCp13_RS00350
CpCp13_RS00625	CpCp13_RS08930
CpCp13_RS03755	CpCp13_RS10885
CpCp13_RS09275	CpCp13_RS02570
CpCp13_RS03760	CpCp13_RS09795
CpCp13_RS00480	CpCp13_RS10085
CpCp13_RS09605	CpCp13_RS01740
CpCp13_RS02260	CpCp13_RS01685
CpCp13_RS06210	CpCp13_RS10270
CpCp13_RS09525	CpCp13_RS05310
CpCp13_RS09725	CpCp13_RS05860
CpCp13_RS04005	CpCp13_RS03795
CpCp13_RS02260	CpCp13_RS10405
CpCp13_RS00280	CpCp13_RS10205
CpCp13_RS07465	CpCp13_RS10485
CpCp13_RS10405	CpCp13_RS04245
CpCp13_RS06640	CpCp13_RS05440
CpCp13_RS07695	CpCp13_RS10050
CpCp13_RS06625	CpCp13_RS03670
CpCp13_RS03755	CpCp13_RS07380
CpCp13_RS08080	CpCp13_RS03720
CpCp13_RS00180	CpCp13_RS03795
CpCp13_RS01895	CpCp13_RS07380
CpCp13_RS03490	CpCp13_RS08560
CpCp13_RS03755	CpCp13_RS02055
CpCp13_RS00115	CpCp13_RS08815
CpCp13_RS03490	CpCp13_RS02140
CpCp13_RS02210	CpCp13_RS10740
CpCp13_RS03070	CpCp13_RS05050
CpCp13_RS08190	CpCp13_RS02055
CpCp13_RS08080	CpCp13_RS00875
CpCp13_RS05880	CpCp13_RS07530
CpCp13_RS02210	CpCp13_RS05030
CpCp13_RS02210	CpCp13_RS00070
CpCp13_RS02210	CpCp13_RS02115
CpCp13_RS02210	CpCp13_RS04425
CpCp13_RS03075	CpCp13_RS04870
CpCp13_RS06060	CpCp13_RS04480
CpCp13_RS00015	CpCp13_RS06040
CpCp13_RS09725	CpCp13_RS04655
CpCp13_RS09530	CpCp13_RS05595
CpCp13_RS00360	CpCp13_RS00570
CpCp13_RS10405	CpCp13_RS09270
CpCp13_RS00450	CpCp13_RS01200
CpCp13_RS07465	CpCp13_RS07335
CpCp13_RS03705	CpCp13_RS03015
CpCp13_RS08190	CpCp13_RS06495
CpCp13_RS09025	CpCp13_RS04845
CpCp13_RS07535	CpCp13_RS10145
CpCp13_RS00065	CpCp13_RS10745
CpCp13_RS03830	CpCp13_RS01090
CpCp13_RS09025	CpCp13_RS01850
CpCp13_RS04730	CpCp13_RS09625
CpCp13_RS00450	CpCp13_RS03095
CpCp13_RS03980	CpCp13_RS05925
CpCp13_RS09415	CpCp13_RS03600
CpCp13_RS04000	CpCp13_RS02285
CpCp13_RS00480	CpCp13_RS03940
CpCp13_RS07030	CpCp13_RS09270
CpCp13_RS07030	CpCp13_RS06105
CpCp13_RS02965	CpCp13_RS06060
CpCp13_RS01885	CpCp13_RS02570
CpCp13_RS03415	CpCp13_RS10735
CpCp13_RS00625	CpCp13_RS03530
CpCp13_RS09025	CpCp13_RS06140
CpCp13_RS07535	CpCp13_RS02995
CpCp13_RS03980	CpCp13_RS05115
CpCp13_RS07425	CpCp13_RS00765
CpCp13_RS10470	CpCp13_RS02340
CpCp13_RS05645	CpCp13_RS03000
CpCp13_RS07425	CpCp13_RS08575
CpCp13_RS08145	CpCp13_RS05225
CpCp13_RS08860	CpCp13_RS01180
CpCp13_RS09025	CpCp13_RS03315
CpCp13_RS00860	CpCp13_RS04975
CpCp13_RS03980	CpCp13_RS03945
CpCp13_RS10125	CpCp13_RS01540
CpCp13_RS03020	CpCp13_RS05225
CpCp13_RS10085	CpCp13_RS06500
CpCp13_RS03490	CpCp13_RS03755
CpCp13_RS08260	CpCp13_RS01625
CpCp13_RS00115	CpCp13_RS10050
CpCp13_RS01180	CpCp13_RS05040
CpCp13_RS04665	CpCp13_RS07110
CpCp13_RS09025	CpCp13_RS04750
CpCp13_RS04665	CpCp13_RS03290
CpCp13_RS01180	CpCp13_RS10405
CpCp13_RS03490	CpCp13_RS00640
CpCp13_RS03440	CpCp13_RS01350
CpCp13_RS05130	CpCp13_RS01660
CpCp13_RS03075	CpCp13_RS04225
CpCp13_RS04515	CpCp13_RS02725
CpCp13_RS09275	CpCp13_RS07875
CpCp13_RS05755	CpCp13_RS01485
CpCp13_RS09275	CpCp13_RS01385
CpCp13_RS02210	CpCp13_RS10380
CpCp13_RS08185	CpCp13_RS00680
CpCp13_RS02210	CpCp13_RS10395
CpCp13_RS06210	CpCp13_RS08500
CpCp13_RS06625	CpCp13_RS09745
CpCp13_RS06210	CpCp13_RS04075
CpCp13_RS06210	CpCp13_RS04510
CpCp13_RS04005	CpCp13_RS05085
CpCp13_RS06855	CpCp13_RS06095
CpCp13_RS06560	CpCp13_RS02695
CpCp13_RS03420	CpCp13_RS04055
CpCp13_RS09725	CpCp13_RS04170
CpCp13_RS08080	CpCp13_RS08730
CpCp13_RS01180	CpCp13_RS00070
CpCp13_RS10085	CpCp13_RS07625
CpCp13_RS02310	CpCp13_RS03375
CpCp13_RS07465	CpCp13_RS07370
CpCp13_RS10090	CpCp13_RS06435
CpCp13_RS06435	CpCp13_RS01275
CpCp13_RS07465	CpCp13_RS06130
CpCp13_RS03020	CpCp13_RS06460
CpCp13_RS03020	CpCp13_RS00405
CpCp13_RS07860	CpCp13_RS07240
CpCp13_RS07465	CpCp13_RS04765
CpCp13_RS02365	CpCp13_RS04900
CpCp13_RS03720	CpCp13_RS00145
CpCp13_RS08215	CpCp13_RS06135
CpCp13_RS07595	CpCp13_RS02290
CpCp13_RS09165	CpCp13_RS06495
CpCp13_RS00145	CpCp13_RS03005
CpCp13_RS09405	CpCp13_RS05225
CpCp13_RS03020	CpCp13_RS01515
CpCp13_RS09165	CpCp13_RS06085
CpCp13_RS09405	CpCp13_RS02265
CpCp13_RS00175	CpCp13_RS00410
CpCp13_RS00145	CpCp13_RS03785
CpCp13_RS00235	CpCp13_RS09715
CpCp13_RS04120	CpCp13_RS05380
CpCp13_RS03070	CpCp13_RS01515
CpCp13_RS09620	CpCp13_RS07985
CpCp13_RS07735	CpCp13_RS08370
CpCp13_RS04515	CpCp13_RS04755
CpCp13_RS03580	CpCp13_RS09000
CpCp13_RS04290	CpCp13_RS09645
CpCp13_RS05285	CpCp13_RS05175
CpCp13_RS06100	CpCp13_RS03560
CpCp13_RS05220	CpCp13_RS10430
CpCp13_RS05220	CpCp13_RS09910
CpCp13_RS03145	CpCp13_RS09020
CpCp13_RS04315	CpCp13_RS07490
CpCp13_RS08225	CpCp13_RS00280
CpCp13_RS00310	CpCp13_RS04720
CpCp13_RS06035	CpCp13_RS05035
CpCp13_RS06100	CpCp13_RS02205
CpCp13_RS08190	CpCp13_RS02505
CpCp13_RS03145	CpCp13_RS00800
CpCp13_RS07305	CpCp13_RS08370
CpCp13_RS09425	CpCp13_RS08480
CpCp13_RS04495	CpCp13_RS05030
CpCp13_RS08190	CpCp13_RS00435
CpCp13_RS05790	CpCp13_RS06865
CpCp13_RS08190	CpCp13_RS03885
CpCp13_RS03705	CpCp13_RS08745
CpCp13_RS10405	CpCp13_RS02265
CpCp13_RS00310	CpCp13_RS03645
CpCp13_RS05790	CpCp13_RS07435
CpCp13_RS05060	CpCp13_RS05750
CpCp13_RS09425	CpCp13_RS06805
CpCp13_RS01995	CpCp13_RS06355
CpCp13_RS04615	CpCp13_RS02500
CpCp13_RS00310	CpCp13_RS08660
CpCp13_RS08795	CpCp13_RS02425
CpCp13_RS08575	CpCp13_RS09105
CpCp13_RS03685	CpCp13_RS08580
CpCp13_RS00550	CpCp13_RS05500
CpCp13_RS03155	CpCp13_RS09960
CpCp13_RS03155	CpCp13_RS10585
CpCp13_RS03515	CpCp13_RS05370
CpCp13_RS09725	CpCp13_RS09135
CpCp13_RS00540	CpCp13_RS09095
CpCp13_RS05790	CpCp13_RS00495
CpCp13_RS10455	CpCp13_RS02135
CpCp13_RS00310	CpCp13_RS08980
CpCp13_RS04120	CpCp13_RS00255
CpCp13_RS07030	CpCp13_RS04010
CpCp13_RS09530	CpCp13_RS07555
CpCp13_RS02370	CpCp13_RS07820
CpCp13_RS04665	CpCp13_RS02080
CpCp13_RS02260	CpCp13_RS08505
CpCp13_RS03760	CpCp13_RS00230
CpCp13_RS04000	CpCp13_RS05455
CpCp13_RS05770	CpCp13_RS02860
CpCp13_RS07305	CpCp13_RS08555
CpCp13_RS03720	CpCp13_RS06485
CpCp13_RS03020	CpCp13_RS00950
CpCp13_RS00180	CpCp13_RS01575
CpCp13_RS03910	CpCp13_RS04850
CpCp13_RS03720	CpCp13_RS08655
CpCp13_RS00265	CpCp13_RS08735
CpCp13_RS00310	CpCp13_RS00050
CpCp13_RS07030	CpCp13_RS05490
CpCp13_RS09165	CpCp13_RS02750
CpCp13_RS10125	CpCp13_RS07215
CpCp13_RS01225	CpCp13_RS09985
CpCp13_RS03720	CpCp13_RS01515
CpCp13_RS10405	CpCp13_RS10740
CpCp13_RS09765	CpCp13_RS03840
CpCp13_RS03720	CpCp13_RS07015
CpCp13_RS03090	CpCp13_RS07070
CpCp13_RS09765	CpCp13_RS06735
CpCp13_RS03920	CpCp13_RS09285
CpCp13_RS04000	CpCp13_RS10430
CpCp13_RS03980	CpCp13_RS08090
CpCp13_RS10085	CpCp13_RS01635
CpCp13_RS03415	CpCp13_RS07110
CpCp13_RS10405	CpCp13_RS10380
CpCp13_RS10085	CpCp13_RS01315
CpCp13_RS05880	CpCp13_RS07170
CpCp13_RS01115	CpCp13_RS08130
CpCp13_RS09990	CpCp13_RS02720
CpCp13_RS03415	CpCp13_RS01245
CpCp13_RS08080	CpCp13_RS06625
CpCp13_RS01030	CpCp13_RS05745
CpCp13_RS03415	CpCp13_RS00915
CpCp13_RS08080	CpCp13_RS05225
CpCp13_RS00795	CpCp13_RS04660
CpCp13_RS09405	CpCp13_RS08380
CpCp13_RS10405	CpCp13_RS10370
CpCp13_RS08160	CpCp13_RS01660
CpCp13_RS03415	CpCp13_RS00130
CpCp13_RS09405	CpCp13_RS02270
CpCp13_RS03155	CpCp13_RS04630
CpCp13_RS00605	CpCp13_RS07450
CpCp13_RS03980	CpCp13_RS06940
CpCp13_RS00450	CpCp13_RS09835
CpCp13_RS08860	CpCp13_RS04115
CpCp13_RS08080	CpCp13_RS10530
CpCp13_RS00875	CpCp13_RS03565
CpCp13_RS04515	CpCp13_RS08705
CpCp13_RS10685	CpCp13_RS01730
CpCp13_RS01735	CpCp13_RS10015
CpCp13_RS00385	CpCp13_RS07255
CpCp13_RS06060	CpCp13_RS10260
CpCp13_RS09725	CpCp13_RS04215
CpCp13_RS09165	CpCp13_RS05995
CpCp13_RS08190	CpCp13_RS07255
CpCp13_RS08145	CpCp13_RS08585
CpCp13_RS01495	CpCp13_RS10355
CpCp13_RS08145	CpCp13_RS08080
CpCp13_RS01180	CpCp13_RS08025
CpCp13_RS02965	CpCp13_RS09405
CpCp13_RS00210	CpCp13_RS08890
CpCp13_RS00210	CpCp13_RS00975
CpCp13_RS00630	CpCp13_RS05790
CpCp13_RS07700	CpCp13_RS06290
CpCp13_RS07860	CpCp13_RS08945
CpCp13_RS01470	CpCp13_RS00590
CpCp13_RS02965	CpCp13_RS05445
CpCp13_RS06230	CpCp13_RS04470
CpCp13_RS04005	CpCp13_RS06410
CpCp13_RS03755	CpCp13_RS03950
CpCp13_RS02210	CpCp13_RS09905
CpCp13_RS03755	CpCp13_RS06495
CpCp13_RS00310	CpCp13_RS07170
CpCp13_RS05775	CpCp13_RS03280
CpCp13_RS00915	CpCp13_RS02045
CpCp13_RS09605	CpCp13_RS03795
CpCp13_RS10470	CpCp13_RS10115
CpCp13_RS07425	CpCp13_RS09645
CpCp13_RS02340	CpCp13_RS04685
CpCp13_RS03070	CpCp13_RS10745
CpCp13_RS00915	CpCp13_RS00795
CpCp13_RS01570	CpCp13_RS07325
CpCp13_RS04075	CpCp13_RS04865
CpCp13_RS01515	CpCp13_RS08760
CpCp13_RS03070	CpCp13_RS08760
CpCp13_RS07645	CpCp13_RS07400
CpCp13_RS08200	CpCp13_RS00685
CpCp13_RS05010	CpCp13_RS08855
CpCp13_RS09275	CpCp13_RS06700
CpCp13_RS09025	CpCp13_RS05140
CpCp13_RS06435	CpCp13_RS01230
CpCp13_RS07735	CpCp13_RS02800
CpCp13_RS01465	CpCp13_RS07170
CpCp13_RS03705	CpCp13_RS03035
CpCp13_RS10550	CpCp13_RS02060
CpCp13_RS07790	CpCp13_RS00165
CpCp13_RS05090	CpCp13_RS01995
CpCp13_RS02340	CpCp13_RS03070
CpCp13_RS02365	CpCp13_RS04725
CpCp13_RS02340	CpCp13_RS06570
CpCp13_RS05010	CpCp13_RS04810
CpCp13_RS09025	CpCp13_RS01425
CpCp13_RS09605	CpCp13_RS02410
CpCp13_RS02365	CpCp13_RS06360
CpCp13_RS00915	CpCp13_RS05830
CpCp13_RS05420	CpCp13_RS09425
CpCp13_RS07595	CpCp13_RS03015
CpCp13_RS08870	CpCp13_RS00115
CpCp13_RS10260	CpCp13_RS05470
CpCp13_RS04515	CpCp13_RS10350
CpCp13_RS01725	CpCp13_RS07410
CpCp13_RS04530	CpCp13_RS01770
CpCp13_RS01180	CpCp13_RS08145
CpCp13_RS00630	CpCp13_RS04060
CpCp13_RS09355	CpCp13_RS04170
CpCp13_RS04515	CpCp13_RS09800
CpCp13_RS02965	CpCp13_RS06595
CpCp13_RS04515	CpCp13_RS01395
CpCp13_RS02025	CpCp13_RS09680
CpCp13_RS03665	CpCp13_RS02120
CpCp13_RS03665	CpCp13_RS09200
CpCp13_RS04730	CpCp13_RS07390
CpCp13_RS04000	CpCp13_RS08860
CpCp13_RS00145	CpCp13_RS06805
CpCp13_RS05715	CpCp13_RS02560
CpCp13_RS00015	CpCp13_RS09545
CpCp13_RS00385	CpCp13_RS08045
CpCp13_RS09165	CpCp13_RS06660
CpCp13_RS05715	CpCp13_RS10685
CpCp13_RS05420	CpCp13_RS05745
CpCp13_RS09165	CpCp13_RS09150
CpCp13_RS03440	CpCp13_RS08545
CpCp13_RS07075	CpCp13_RS07100
CpCp13_RS07075	CpCp13_RS07090
CpCp13_RS05420	CpCp13_RS05500
CpCp13_RS03070	CpCp13_RS04285
CpCp13_RS07120	CpCp13_RS01605
CpCp13_RS07410	CpCp13_RS00165
CpCp13_RS01470	CpCp13_RS01825
CpCp13_RS00480	CpCp13_RS03545
CpCp13_RS08190	CpCp13_RS06200
CpCp13_RS10550	CpCp13_RS09115
CpCp13_RS02895	CpCp13_RS07905
CpCp13_RS01470	CpCp13_RS10060
CpCp13_RS08145	CpCp13_RS00070
CpCp13_RS01115	CpCp13_RS06170
CpCp13_RS01580	CpCp13_RS08330
CpCp13_RS01030	CpCp13_RS05370
CpCp13_RS08215	CpCp13_RS03320
CpCp13_RS02075	CpCp13_RS10010
CpCp13_RS01580	CpCp13_RS03485
CpCp13_RS10550	CpCp13_RS04335
CpCp13_RS03980	CpCp13_RS06185
CpCp13_RS00550	CpCp13_RS03070
CpCp13_RS00280	CpCp13_RS00830
CpCp13_RS00915	CpCp13_RS01325
CpCp13_RS09825	CpCp13_RS04675
CpCp13_RS09050	CpCp13_RS03210
CpCp13_RS03415	CpCp13_RS07380
CpCp13_RS05420	CpCp13_RS02340
CpCp13_RS06100	CpCp13_RS05220
CpCp13_RS00605	CpCp13_RS10045
CpCp13_RS03680	CpCp13_RS09535
CpCp13_RS04495	CpCp13_RS06625
CpCp13_RS03980	CpCp13_RS02110
CpCp13_RS09405	CpCp13_RS03370
CpCp13_RS03980	CpCp13_RS04670
CpCp13_RS05660	CpCp13_RS06775
CpCp13_RS03415	CpCp13_RS02400
CpCp13_RS00915	CpCp13_RS10085
CpCp13_RS00795	CpCp13_RS02290
CpCp13_RS05420	CpCp13_RS03070
CpCp13_RS04005	CpCp13_RS01175
CpCp13_RS04975	CpCp13_RS08730
CpCp13_RS03755	CpCp13_RS01890
CpCp13_RS05420	CpCp13_RS00550
CpCp13_RS00365	CpCp13_RS00950
CpCp13_RS00550	CpCp13_RS00950
CpCp13_RS05880	CpCp13_RS00595
CpCp13_RS01030	CpCp13_RS07015
CpCp13_RS06235	CpCp13_RS07640
CpCp13_RS06235	CpCp13_RS09590
CpCp13_RS07645	CpCp13_RS07625
CpCp13_RS01030	CpCp13_RS08235
CpCp13_RS09605	CpCp13_RS06110
CpCp13_RS04615	CpCp13_RS05455
CpCp13_RS03755	CpCp13_RS07110
CpCp13_RS08080	CpCp13_RS04295
CpCp13_RS04615	CpCp13_RS09210
CpCp13_RS08860	CpCp13_RS01605
CpCp13_RS07545	CpCp13_RS02155
CpCp13_RS02895	CpCp13_RS00610
CpCp13_RS05750	CpCp13_RS01160
CpCp13_RS04550	CpCp13_RS03730
CpCp13_RS02160	CpCp13_RS03830
CpCp13_RS09165	CpCp13_RS10780
CpCp13_RS02210	CpCp13_RS08930
CpCp13_RS00310	CpCp13_RS04390
CpCp13_RS07535	CpCp13_RS03255
CpCp13_RS00625	CpCp13_RS01570
CpCp13_RS09530	CpCp13_RS02735
CpCp13_RS02175	CpCp13_RS09000
CpCp13_RS08225	CpCp13_RS10205
CpCp13_RS02175	CpCp13_RS08780
CpCp13_RS03720	CpCp13_RS04420
CpCp13_RS09875	CpCp13_RS05110
CpCp13_RS05780	CpCp13_RS00675
CpCp13_RS09275	CpCp13_RS06555
CpCp13_RS00180	CpCp13_RS08730
CpCp13_RS04000	CpCp13_RS10635
CpCp13_RS07730	CpCp13_RS01695
CpCp13_RS03960	CpCp13_RS09840
CpCp13_RS08885	CpCp13_RS03520
CpCp13_RS01480	CpCp13_RS04675
CpCp13_RS07535	CpCp13_RS00635
CpCp13_RS07735	CpCp13_RS07550
CpCp13_RS04120	CpCp13_RS03185
CpCp13_RS03720	CpCp13_RS02115
CpCp13_RS07030	CpCp13_RS06045
CpCp13_RS01885	CpCp13_RS03275
CpCp13_RS05010	CpCp13_RS07555
CpCp13_RS02070	CpCp13_RS02290
CpCp13_RS02365	CpCp13_RS00635
CpCp13_RS08260	CpCp13_RS10660
CpCp13_RS00310	CpCp13_RS07425
CpCp13_RS03075	CpCp13_RS05800
CpCp13_RS09025	CpCp13_RS09110
CpCp13_RS05010	CpCp13_RS05005
CpCp13_RS10150	CpCp13_RS03340
CpCp13_RS00310	CpCp13_RS05565
CpCp13_RS05770	CpCp13_RS03300
CpCp13_RS00180	CpCp13_RS02490
CpCp13_RS00945	CpCp13_RS01505
CpCp13_RS02365	CpCp13_RS09820
CpCp13_RS05010	CpCp13_RS03625
CpCp13_RS05010	CpCp13_RS01435
CpCp13_RS05220	CpCp13_RS04780
CpCp13_RS05790	CpCp13_RS05745
CpCp13_RS01895	CpCp13_RS07765
CpCp13_RS08795	CpCp13_RS00110
CpCp13_RS09530	CpCp13_RS07830
CpCp13_RS09725	CpCp13_RS03505
CpCp13_RS05790	CpCp13_RS03585
CpCp13_RS00875	CpCp13_RS09815
CpCp13_RS00175	CpCp13_RS09255
CpCp13_RS03515	CpCp13_RS08730
CpCp13_RS04000	CpCp13_RS10255
CpCp13_RS00145	CpCp13_RS08340
CpCp13_RS01895	CpCp13_RS09235
CpCp13_RS06875	CpCp13_RS08135
CpCp13_RS00235	CpCp13_RS02320
CpCp13_RS09165	CpCp13_RS08245
CpCp13_RS01290	CpCp13_RS03010
CpCp13_RS00235	CpCp13_RS02765
CpCp13_RS02210	CpCp13_RS10405
CpCp13_RS02665	CpCp13_RS10180
CpCp13_RS00115	CpCp13_RS10040
CpCp13_RS02365	CpCp13_RS04930
CpCp13_RS09620	CpCp13_RS00740
CpCp13_RS09725	CpCp13_RS07920
CpCp13_RS03515	CpCp13_RS06105
CpCp13_RS00175	CpCp13_RS04985
CpCp13_RS06400	CpCp13_RS08920
CpCp13_RS07535	CpCp13_RS04515
CpCp13_RS01895	CpCp13_RS09290
CpCp13_RS02210	CpCp13_RS04000
CpCp13_RS00915	CpCp13_RS00480
CpCp13_RS02620	CpCp13_RS07735
CpCp13_RS08080	CpCp13_RS04345
CpCp13_RS03980	CpCp13_RS04745
CpCp13_RS02440	CpCp13_RS10060
CpCp13_RS05420	CpCp13_RS00145
CpCp13_RS07465	CpCp13_RS04505
CpCp13_RS08080	CpCp13_RS01575
CpCp13_RS00915	CpCp13_RS08640
CpCp13_RS09635	CpCp13_RS08705
CpCp13_RS02260	CpCp13_RS09270
CpCp13_RS03980	CpCp13_RS10045
CpCp13_RS08885	CpCp13_RS00250
CpCp13_RS00115	CpCp13_RS10500
CpCp13_RS02075	CpCp13_RS02555
CpCp13_RS08080	CpCp13_RS09675
CpCp13_RS03980	CpCp13_RS02590
CpCp13_RS02440	CpCp13_RS06110
CpCp13_RS07740	CpCp13_RS01600
CpCp13_RS01580	CpCp13_RS09480
CpCp13_RS00115	CpCp13_RS00485
CpCp13_RS06855	CpCp13_RS10380
CpCp13_RS10030	CpCp13_RS06060
CpCp13_RS03685	CpCp13_RS01030
CpCp13_RS05755	CpCp13_RS09315
CpCp13_RS00450	CpCp13_RS01210
CpCp13_RS09405	CpCp13_RS05685
CpCp13_RS03980	CpCp13_RS05535
CpCp13_RS08185	CpCp13_RS09135
CpCp13_RS03755	CpCp13_RS09470
CpCp13_RS09295	CpCp13_RS08580
CpCp13_RS09165	CpCp13_RS07185
CpCp13_RS04730	CpCp13_RS01335
CpCp13_RS04730	CpCp13_RS00045
CpCp13_RS01725	CpCp13_RS02335
CpCp13_RS04000	CpCp13_RS09770
CpCp13_RS09025	CpCp13_RS01585
CpCp13_RS09355	CpCp13_RS08250
CpCp13_RS06060	CpCp13_RS08730
CpCp13_RS08190	CpCp13_RS00850
CpCp13_RS00145	CpCp13_RS00550
CpCp13_RS08475	CpCp13_RS01115
CpCp13_RS09165	CpCp13_RS06590
CpCp13_RS07075	CpCp13_RS10740
CpCp13_RS07465	CpCp13_RS04650
CpCp13_RS03755	CpCp13_RS02505
CpCp13_RS09165	CpCp13_RS00530
CpCp13_RS01610	CpCp13_RS07095
CpCp13_RS08200	CpCp13_RS01720
CpCp13_RS05790	CpCp13_RS04295
CpCp13_RS07075	CpCp13_RS04425
CpCp13_RS00265	CpCp13_RS09440
CpCp13_RS08360	CpCp13_RS00285
CpCp13_RS00145	CpCp13_RS06530
CpCp13_RS07075	CpCp13_RS10405
CpCp13_RS07595	CpCp13_RS00480
CpCp13_RS00210	CpCp13_RS06360
CpCp13_RS07860	CpCp13_RS02140
CpCp13_RS00145	CpCp13_RS03725
CpCp13_RS01575	CpCp13_RS08060
CpCp13_RS01115	CpCp13_RS00485
CpCp13_RS07645	CpCp13_RS00760
CpCp13_RS00860	CpCp13_RS00390
CpCp13_RS00915	CpCp13_RS00310
CpCp13_RS04005	CpCp13_RS03370
CpCp13_RS07465	CpCp13_RS00635
CpCp13_RS03755	CpCp13_RS02140
CpCp13_RS10545	CpCp13_RS03755
CpCp13_RS04375	CpCp13_RS02760
CpCp13_RS10085	CpCp13_RS06665
CpCp13_RS03720	CpCp13_RS05705
CpCp13_RS06560	CpCp13_RS05055
CpCp13_RS05990	CpCp13_RS08480
CpCp13_RS01180	CpCp13_RS04245
CpCp13_RS09765	CpCp13_RS01690
CpCp13_RS07465	CpCp13_RS03820
CpCp13_RS05285	CpCp13_RS05655
CpCp13_RS01180	CpCp13_RS02210
CpCp13_RS03145	CpCp13_RS03540
CpCp13_RS03760	CpCp13_RS05135
CpCp13_RS01180	CpCp13_RS08255
CpCp13_RS09025	CpCp13_RS08250
CpCp13_RS01575	CpCp13_RS04480
CpCp13_RS00145	CpCp13_RS07315
CpCp13_RS07775	CpCp13_RS03705
CpCp13_RS08145	CpCp13_RS03565
CpCp13_RS07030	CpCp13_RS03715
CpCp13_RS07755	CpCp13_RS09865
CpCp13_RS06035	CpCp13_RS09225
CpCp13_RS08605	CpCp13_RS05305
CpCp13_RS09725	CpCp13_RS04205
CpCp13_RS05880	CpCp13_RS01485
CpCp13_RS03490	CpCp13_RS01290
CpCp13_RS05880	CpCp13_RS06940
CpCp13_RS05880	CpCp13_RS07620
CpCp13_RS03415	CpCp13_RS04235
CpCp13_RS01885	CpCp13_RS01245
CpCp13_RS07695	CpCp13_RS02760
[truncated: 84,367 more rows]

## Sheet: CP-258_network
Gene1	Gene2	Value
CP258_RS02980	CP258_RS07025	0.972
CP258_RS02980	CP258_RS10710	0.971
CP258_RS03615	CP258_RS09645	0.969
CP258_RS02980	CP258_RS01780	0.969
CP258_RS02980	CP258_RS08845	0.968
CP258_RS02980	CP258_RS00310	0.968
CP258_RS02980	CP258_RS01265	0.968
CP258_RS03635	CP258_RS03475	0.966
CP258_RS03645	CP258_RS00455	0.964
CP258_RS02975	CP258_RS07530	0.964
CP258_RS02975	CP258_RS10455	0.964
CP258_RS02980	CP258_RS08190	0.963
CP258_RS02975	CP258_RS05575	0.963
CP258_RS02980	CP258_RS06190	0.962
CP258_RS02835	CP258_RS07225	0.96
CP258_RS02980	CP258_RS06330	0.96
CP258_RS03065	CP258_RS10100	0.959
CP258_RS02980	CP258_RS03035	0.958
CP258_RS02980	CP258_RS09965	0.958
CP258_RS02980	CP258_RS08455	0.958
CP258_RS02975	CP258_RS10390	0.957
CP258_RS02885	CP258_RS07390	0.957
CP258_RS03450	CP258_RS03105	0.957
CP258_RS02980	CP258_RS03400	0.957
CP258_RS02975	CP258_RS05235	0.956
CP258_RS03480	CP258_RS08375	0.956
CP258_RS03330	CP258_RS00100	0.956
CP258_RS02975	CP258_RS08970	0.956
CP258_RS02980	CP258_RS06750	0.956
CP258_RS02980	CP258_RS09900	0.956
CP258_RS02980	CP258_RS04170	0.955
CP258_RS02980	CP258_RS05955	0.955
CP258_RS03640	CP258_RS10100	0.955
CP258_RS02980	CP258_RS03580	0.954
CP258_RS02980	CP258_RS06120	0.953
CP258_RS03235	CP258_RS09940	0.953
CP258_RS02980	CP258_RS09710	0.953
CP258_RS02980	CP258_RS05825	0.953
CP258_RS02975	CP258_RS05515	0.953
CP258_RS02975	CP258_RS06160	0.952
CP258_RS03645	CP258_RS02490	0.952
CP258_RS03330	CP258_RS02050	0.952
CP258_RS03655	CP258_RS00840	0.951
CP258_RS02980	CP258_RS01475	0.951
CP258_RS02975	CP258_RS07230	0.951
CP258_RS02975	CP258_RS08215	0.951
CP258_RS02980	CP258_RS04020	0.951
CP258_RS03330	CP258_RS02970	0.951
CP258_RS02980	CP258_RS04880	0.951
CP258_RS03330	CP258_RS02435	0.951
CP258_RS03480	CP258_RS07375	0.951
CP258_RS02980	CP258_RS03485	0.95
CP258_RS02980	CP258_RS01705	0.95
CP258_RS02980	CP258_RS01680	0.95
CP258_RS02785	CP258_RS01900	0.95
CP258_RS03180	CP258_RS09940	0.95
CP258_RS03495	CP258_RS02550	0.949
CP258_RS03330	CP258_RS08745	0.949
CP258_RS03480	CP258_RS06060	0.949
CP258_RS02980	CP258_RS02290	0.949
CP258_RS02980	CP258_RS02345	0.949
CP258_RS03330	CP258_RS00315	0.949
CP258_RS03330	CP258_RS01665	0.949
CP258_RS03330	CP258_RS00625	0.949
CP258_RS03330	CP258_RS08880	0.949
CP258_RS02835	CP258_RS09920	0.949
CP258_RS03330	CP258_RS10050	0.948
CP258_RS03480	CP258_RS09960	0.948
CP258_RS02980	CP258_RS04775	0.948
CP258_RS03075	CP258_RS09790	0.948
CP258_RS02980	CP258_RS03565	0.948
CP258_RS03635	CP258_RS00910	0.948
CP258_RS02980	CP258_RS05085	0.948
CP258_RS03480	CP258_RS07700	0.948
CP258_RS02975	CP258_RS10300	0.947
CP258_RS03895	CP258_RS09790	0.947
CP258_RS02980	CP258_RS00040	0.947
CP258_RS03105	CP258_RS00485	0.947
CP258_RS03750	CP258_RS08855	0.947
CP258_RS02980	CP258_RS01155	0.947
CP258_RS02980	CP258_RS01160	0.947
CP258_RS03750	CP258_RS10090	0.947
CP258_RS03595	CP258_RS10190	0.946
CP258_RS03905	CP258_RS09015	0.946
CP258_RS03450	CP258_RS00460	0.946
CP258_RS03480	CP258_RS05940	0.946
CP258_RS03450	CP258_RS02550	0.946
CP258_RS03410	CP258_RS08790	0.946
CP258_RS03480	CP258_RS06070	0.946
CP258_RS03475	CP258_RS02380	0.945
CP258_RS02980	CP258_RS05355	0.945
CP258_RS03630	CP258_RS10235	0.945
CP258_RS02990	CP258_RS10550	0.945
CP258_RS03200	CP258_RS00895	0.945
CP258_RS03480	CP258_RS04300	0.945
CP258_RS03105	CP258_RS00720	0.945
CP258_RS02980	CP258_RS10820	0.945
CP258_RS03480	CP258_RS04140	0.945
CP258_RS02980	CP258_RS01300	0.945
CP258_RS03220	CP258_RS00930	0.945
CP258_RS02980	CP258_RS08815	0.944
CP258_RS03070	CP258_RS02990	0.944
CP258_RS03190	CP258_RS04185	0.944
CP258_RS02940	CP258_RS01895	0.944
CP258_RS03145	CP258_RS02990	0.944
CP258_RS03480	CP258_RS07500	0.944
CP258_RS02980	CP258_RS07135	0.944
CP258_RS03105	CP258_RS02275	0.944
CP258_RS03480	CP258_RS07495	0.944
CP258_RS03445	CP258_RS07550	0.943
CP258_RS03750	CP258_RS07470	0.943
CP258_RS02980	CP258_RS10330	0.943
CP258_RS02990	CP258_RS10635	0.943
CP258_RS03255	CP258_RS00410	0.943
CP258_RS02980	CP258_RS05400	0.943
CP258_RS02810	CP258_RS00590	0.943
CP258_RS04750	CP258_RS10685	0.943
CP258_RS02980	CP258_RS00655	0.943
CP258_RS02980	CP258_RS02045	0.943
CP258_RS04895	CP258_RS05285	0.943
CP258_RS02755	CP258_RS01810	0.943
CP258_RS02980	CP258_RS07355	0.943
CP258_RS03575	CP258_RS01735	0.943
CP258_RS03440	CP258_RS01735	0.942
CP258_RS02980	CP258_RS09865	0.942
CP258_RS02980	CP258_RS07105	0.942
CP258_RS04895	CP258_RS09015	0.942
CP258_RS02985	CP258_RS01425	0.942
CP258_RS03480	CP258_RS00020	0.942
CP258_RS03455	CP258_RS04435	0.942
CP258_RS02980	CP258_RS09150	0.942
CP258_RS03810	CP258_RS10380	0.942
CP258_RS03840	CP258_RS00195	0.942
CP258_RS04755	CP258_RS07225	0.941
CP258_RS03330	CP258_RS03075	0.941
CP258_RS04970	CP258_RS10505	0.941
CP258_RS02950	CP258_RS07845	0.941
CP258_RS03330	CP258_RS01190	0.941
CP258_RS02990	CP258_RS04185	0.941
CP258_RS03525	CP258_RS02980	0.941
CP258_RS02980	CP258_RS07035	0.94
CP258_RS03855	CP258_RS00925	0.94
CP258_RS03105	CP258_RS02165	0.94
CP258_RS03480	CP258_RS06055	0.94
CP258_RS03240	CP258_RS01685	0.94
CP258_RS03000	CP258_RS08810	0.94
CP258_RS02805	CP258_RS01900	0.94
CP258_RS03330	CP258_RS03990	0.94
CP258_RS02955	CP258_RS10300	0.94
CP258_RS03195	CP258_RS10100	0.94
CP258_RS02985	CP258_RS00905	0.94
CP258_RS03480	CP258_RS07215	0.94
CP258_RS02980	CP258_RS07080	0.94
CP258_RS02955	CP258_RS10455	0.94
CP258_RS03480	CP258_RS06890	0.939
CP258_RS03480	CP258_RS08225	0.939
CP258_RS03330	CP258_RS06475	0.939
CP258_RS03125	CP258_RS10555	0.939
CP258_RS04895	CP258_RS09920	0.939
CP258_RS03350	CP258_RS07725	0.939
CP258_RS03105	CP258_RS02620	0.939
CP258_RS03835	CP258_RS10670	0.939
CP258_RS03105	CP258_RS02875	0.939
CP258_RS04970	CP258_RS06185	0.938
CP258_RS02980	CP258_RS07685	0.938
CP258_RS03105	CP258_RS02565	0.938
CP258_RS03105	CP258_RS01625	0.938
CP258_RS02930	CP258_RS01025	0.938
CP258_RS03070	CP258_RS02605	0.938
CP258_RS02955	CP258_RS05235	0.938
CP258_RS02980	CP258_RS10055	0.938
CP258_RS03365	CP258_RS03105	0.938
CP258_RS03460	CP258_RS02990	0.938
CP258_RS04895	CP258_RS07365	0.938
CP258_RS03835	CP258_RS04940	0.938
CP258_RS02980	CP258_RS09240	0.938
CP258_RS03140	CP258_RS01890	0.938
CP258_RS03480	CP258_RS09945	0.938
CP258_RS03640	CP258_RS10785	0.938
CP258_RS04970	CP258_RS06285	0.938
CP258_RS03375	CP258_RS07545	0.938
CP258_RS05235	CP258_RS04940	0.938
CP258_RS03105	CP258_RS02270	0.937
CP258_RS02980	CP258_RS07750	0.937
CP258_RS03690	CP258_RS07545	0.937
CP258_RS03350	CP258_RS01255	0.937
CP258_RS04755	CP258_RS00985	0.937
CP258_RS03380	CP258_RS00275	0.937
CP258_RS03105	CP258_RS02110	0.937
CP258_RS03105	CP258_RS01405	0.937
CP258_RS03905	CP258_RS05170	0.937
CP258_RS02780	CP258_RS08405	0.937
CP258_RS03330	CP258_RS02070	0.937
CP258_RS02950	CP258_RS01815	0.937
CP258_RS02980	CP258_RS06460	0.936
CP258_RS03970	CP258_RS08825	0.936
CP258_RS03240	CP258_RS09645	0.936
CP258_RS03675	CP258_RS08805	0.936
CP258_RS03750	CP258_RS07220	0.936
CP258_RS02990	CP258_RS08060	0.936
CP258_RS02980	CP258_RS05740	0.936
CP258_RS02995	CP258_RS01095	0.936
CP258_RS02780	CP258_RS09105	0.936
CP258_RS03145	CP258_RS02605	0.936
CP258_RS03330	CP258_RS00035	0.936
CP258_RS03350	CP258_RS09820	0.936
CP258_RS03205	CP258_RS08175	0.936
CP258_RS02980	CP258_RS07515	0.936
CP258_RS03105	CP258_RS00220	0.936
CP258_RS04280	CP258_RS09135	0.936
CP258_RS03515	CP258_RS07050	0.936
CP258_RS03350	CP258_RS09695	0.936
CP258_RS02980	CP258_RS01285	0.936
CP258_RS03350	CP258_RS07395	0.935
CP258_RS03410	CP258_RS10580	0.935
CP258_RS02955	CP258_RS07225	0.935
CP258_RS03330	CP258_RS02355	0.935
CP258_RS02980	CP258_RS10115	0.935
CP258_RS03200	CP258_RS02785	0.935
CP258_RS02810	CP258_RS00830	0.935
CP258_RS03480	CP258_RS10775	0.934
CP258_RS02975	CP258_RS09920	0.934
CP258_RS04970	CP258_RS09640	0.934
CP258_RS02980	CP258_RS04050	0.934
CP258_RS02780	CP258_RS04975	0.934
CP258_RS04970	CP258_RS10385	0.934
CP258_RS03220	CP258_RS07390	0.934
CP258_RS02980	CP258_RS09385	0.934
CP258_RS03170	CP258_RS04625	0.934
CP258_RS03905	CP258_RS08385	0.934
CP258_RS03350	CP258_RS03795	0.934
CP258_RS03320	CP258_RS10380	0.934
CP258_RS02980	CP258_RS01445	0.934
CP258_RS02980	CP258_RS03525	0.933
CP258_RS02980	CP258_RS01275	0.933
CP258_RS02980	CP258_RS05855	0.933
CP258_RS02755	CP258_RS08025	0.933
CP258_RS03715	CP258_RS00715	0.933
CP258_RS04970	CP258_RS10200	0.933
CP258_RS03330	CP258_RS00345	0.933
CP258_RS02805	CP258_RS07830	0.933
CP258_RS05235	CP258_RS01235	0.933
CP258_RS03200	CP258_RS02705	0.933
CP258_RS05235	CP258_RS02955	0.933
CP258_RS04280	CP258_RS05835	0.933
CP258_RS03105	CP258_RS01305	0.933
CP258_RS03205	CP258_RS04670	0.933
CP258_RS02980	CP258_RS03825	0.932
CP258_RS03380	CP258_RS03330	0.932
CP258_RS03575	CP258_RS03205	0.932
CP258_RS02780	CP258_RS07400	0.932
CP258_RS02980	CP258_RS01045	0.932
CP258_RS04320	CP258_RS07545	0.932
CP258_RS02780	CP258_RS07005	0.932
CP258_RS02980	CP258_RS09860	0.932
CP258_RS03460	CP258_RS08200	0.932
CP258_RS02980	CP258_RS08920	0.932
CP258_RS03135	CP258_RS03480	0.932
CP258_RS02975	CP258_RS04135	0.932
CP258_RS03480	CP258_RS06960	0.932
CP258_RS03205	CP258_RS04900	0.932
CP258_RS04455	CP258_RS10610	0.932
CP258_RS03105	CP258_RS01045	0.931
CP258_RS02980	CP258_RS04525	0.931
CP258_RS03480	CP258_RS04645	0.931
CP258_RS03255	CP258_RS01620	0.931
CP258_RS03080	CP258_RS04195	0.931
CP258_RS03700	CP258_RS01735	0.931
CP258_RS03105	CP258_RS01130	0.931
CP258_RS03480	CP258_RS05850	0.931
CP258_RS03350	CP258_RS00615	0.931
CP258_RS05155	CP258_RS10100	0.931
CP258_RS02980	CP258_RS04570	0.931
CP258_RS02980	CP258_RS04485	0.931
CP258_RS04625	CP258_RS08785	0.931
CP258_RS02975	CP258_RS03835	0.931
CP258_RS03855	CP258_RS02985	0.931
CP258_RS03510	CP258_RS07050	0.931
CP258_RS03675	CP258_RS07550	0.931
CP258_RS03505	CP258_RS10155	0.931
CP258_RS03715	CP258_RS00925	0.931
CP258_RS02980	CP258_RS08015	0.931
CP258_RS02980	CP258_RS07330	0.93
CP258_RS03205	CP258_RS08150	0.93
CP258_RS02805	CP258_RS00325	0.93
CP258_RS03205	CP258_RS09685	0.93
CP258_RS02780	CP258_RS10315	0.93
CP258_RS03170	CP258_RS08975	0.93
CP258_RS03170	CP258_RS07390	0.93
CP258_RS03240	CP258_RS07480	0.93
CP258_RS03145	CP258_RS10490	0.93
CP258_RS04970	CP258_RS06325	0.93
CP258_RS02780	CP258_RS07255	0.93
CP258_RS02980	CP258_RS02280	0.93
CP258_RS03200	CP258_RS03110	0.93
CP258_RS03450	CP258_RS02980	0.93
CP258_RS04280	CP258_RS01690	0.93
CP258_RS04175	CP258_RS08855	0.93
CP258_RS02760	CP258_RS08820	0.93
CP258_RS04175	CP258_RS10090	0.93
CP258_RS02995	CP258_RS09395	0.93
CP258_RS02980	CP258_RS02660	0.93
CP258_RS03205	CP258_RS05145	0.929
CP258_RS03350	CP258_RS00595	0.929
CP258_RS02980	CP258_RS03760	0.929
CP258_RS02980	CP258_RS03865	0.929
CP258_RS02975	CP258_RS07225	0.929
CP258_RS02780	CP258_RS10140	0.929
CP258_RS02980	CP258_RS04380	0.929
CP258_RS03195	CP258_RS01025	0.929
CP258_RS03815	CP258_RS08825	0.929
CP258_RS03680	CP258_RS00760	0.929
CP258_RS04575	CP258_RS06375	0.929
CP258_RS02955	CP258_RS06160	0.929
CP258_RS02980	CP258_RS06235	0.929
CP258_RS03205	CP258_RS05630	0.929
CP258_RS02975	CP258_RS08155	0.929
CP258_RS05300	CP258_RS08825	0.929
CP258_RS03715	CP258_RS02985	0.929
CP258_RS02780	CP258_RS05410	0.929
CP258_RS03080	CP258_RS00845	0.928
CP258_RS03205	CP258_RS07070	0.928
CP258_RS02980	CP258_RS06850	0.928
CP258_RS03330	CP258_RS03590	0.928
CP258_RS02755	CP258_RS02995	0.928
CP258_RS02980	CP258_RS09425	0.928
CP258_RS02980	CP258_RS05415	0.928
CP258_RS02980	CP258_RS05035	0.928
CP258_RS03585	CP258_RS01735	0.928
CP258_RS02780	CP258_RS07720	0.928
CP258_RS02980	CP258_RS04535	0.928
CP258_RS03350	CP258_RS06360	0.928
CP258_RS03175	CP258_RS00460	0.928
CP258_RS03205	CP258_RS05715	0.928
CP258_RS02985	CP258_RS02155	0.928
CP258_RS02780	CP258_RS05525	0.928
CP258_RS02980	CP258_RS04385	0.928
CP258_RS03490	CP258_RS10560	0.928
CP258_RS03205	CP258_RS08430	0.928
CP258_RS03830	CP258_RS09610	0.928
CP258_RS02980	CP258_RS03975	0.928
CP258_RS02985	CP258_RS06080	0.928
CP258_RS03105	CP258_RS02045	0.928
CP258_RS03330	CP258_RS09000	0.928
CP258_RS03630	CP258_RS05160	0.928
CP258_RS02780	CP258_RS09735	0.927
CP258_RS03905	CP258_RS05285	0.927
CP258_RS03630	CP258_RS10230	0.927
CP258_RS02980	CP258_RS06515	0.927
CP258_RS02980	CP258_RS07360	0.927
CP258_RS02755	CP258_RS07920	0.927
CP258_RS03105	CP258_RS00655	0.927
CP258_RS03615	CP258_RS08020	0.927
CP258_RS02955	CP258_RS08970	0.927
CP258_RS03275	CP258_RS07545	0.927
CP258_RS02755	CP258_RS09815	0.927
CP258_RS02980	CP258_RS10290	0.927
CP258_RS03475	CP258_RS03260	0.927
CP258_RS03205	CP258_RS06030	0.927
CP258_RS03200	CP258_RS02255	0.927
CP258_RS02800	CP258_RS04280	0.926
CP258_RS03480	CP258_RS03540	0.926
CP258_RS02985	CP258_RS02515	0.926
CP258_RS02980	CP258_RS07270	0.926
CP258_RS03255	CP258_RS01125	0.926
CP258_RS02980	CP258_RS01785	0.926
CP258_RS02835	CP258_RS09015	0.926
CP258_RS03635	CP258_RS01175	0.926
CP258_RS02980	CP258_RS09410	0.926
CP258_RS02980	CP258_RS10420	0.926
CP258_RS03205	CP258_RS09040	0.926
CP258_RS03675	CP258_RS04190	0.926
CP258_RS02985	CP258_RS04460	0.926
CP258_RS03135	CP258_RS09305	0.926
CP258_RS03905	CP258_RS04750	0.926
CP258_RS02980	CP258_RS07245	0.926
CP258_RS03205	CP258_RS05620	0.926
CP258_RS02760	CP258_RS07420	0.926
CP258_RS03105	CP258_RS06150	0.926
CP258_RS05155	CP258_RS01025	0.926
CP258_RS03350	CP258_RS06930	0.926
CP258_RS04625	CP258_RS03220	0.926
CP258_RS02980	CP258_RS04870	0.926
CP258_RS03205	CP258_RS04245	0.926
CP258_RS03750	CP258_RS09815	0.926
CP258_RS03205	CP258_RS03690	0.926
CP258_RS04975	CP258_RS00250	0.926
CP258_RS03795	CP258_RS00255	0.926
CP258_RS03755	CP258_RS01685	0.926
CP258_RS03345	CP258_RS04720	0.925
CP258_RS04575	CP258_RS01610	0.925
CP258_RS03190	CP258_RS10635	0.925
CP258_RS02940	CP258_RS02685	0.925
CP258_RS03455	CP258_RS10670	0.925
CP258_RS03630	CP258_RS09725	0.925
CP258_RS05235	CP258_RS02975	0.925
CP258_RS03265	CP258_RS01630	0.925
CP258_RS03105	CP258_RS05790	0.925
CP258_RS03350	CP258_RS02570	0.925
CP258_RS04195	CP258_RS08860	0.925
CP258_RS04970	CP258_RS10515	0.925
CP258_RS04195	CP258_RS10525	0.925
CP258_RS03535	CP258_RS01735	0.925
CP258_RS03675	CP258_RS07960	0.925
CP258_RS03490	CP258_RS07960	0.925
CP258_RS04895	CP258_RS07225	0.925
CP258_RS02980	CP258_RS10475	0.925
CP258_RS02940	CP258_RS00875	0.925
CP258_RS03905	CP258_RS02160	0.925
CP258_RS02780	CP258_RS00415	0.925
CP258_RS02980	CP258_RS01625	0.925
CP258_RS03205	CP258_RS07770	0.925
CP258_RS02980	CP258_RS09355	0.925
CP258_RS02980	CP258_RS03495	0.925
CP258_RS03205	CP258_RS08045	0.925
CP258_RS03690	CP258_RS03205	0.925
CP258_RS04625	CP258_RS05530	0.925
CP258_RS03205	CP258_RS04360	0.924
CP258_RS02760	CP258_RS02220	0.924
CP258_RS03205	CP258_RS05710	0.924
CP258_RS04970	CP258_RS10510	0.924
CP258_RS05405	CP258_RS03960	0.924
CP258_RS03205	CP258_RS03705	0.924
CP258_RS03205	CP258_RS05510	0.924
CP258_RS02980	CP258_RS04230	0.924
CP258_RS04970	CP258_RS08335	0.924
CP258_RS02955	CP258_RS05515	0.924
CP258_RS02980	CP258_RS05360	0.924
CP258_RS02980	CP258_RS08420	0.924
CP258_RS02750	CP258_RS08355	0.924
CP258_RS02780	CP258_RS05420	0.924
CP258_RS03910	CP258_RS01630	0.924
CP258_RS02980	CP258_RS08675	0.924
CP258_RS05105	CP258_RS04135	0.924
CP258_RS03065	CP258_RS08975	0.924
CP258_RS03615	CP258_RS07480	0.924
CP258_RS03000	CP258_RS03480	0.924
CP258_RS04750	CP258_RS10245	0.924
CP258_RS04755	CP258_RS09920	0.924
CP258_RS04755	CP258_RS02505	0.924
CP258_RS03205	CP258_RS08935	0.924
CP258_RS02805	CP258_RS09305	0.924
CP258_RS03205	CP258_RS04875	0.924
CP258_RS03960	CP258_RS06480	0.924
CP258_RS02805	CP258_RS01575	0.924
CP258_RS03205	CP258_RS05015	0.924
CP258_RS03480	CP258_RS05065	0.924
CP258_RS03265	CP258_RS00425	0.923
CP258_RS03205	CP258_RS06260	0.923
CP258_RS04895	CP258_RS08215	0.923
CP258_RS02750	CP258_RS04365	0.923
CP258_RS03635	CP258_RS00890	0.923
CP258_RS02980	CP258_RS06385	0.923
CP258_RS02955	CP258_RS10390	0.923
CP258_RS03450	CP258_RS02750	0.923
CP258_RS03205	CP258_RS04350	0.923
CP258_RS02750	CP258_RS05120	0.923
CP258_RS04280	CP258_RS02430	0.923
CP258_RS05105	CP258_RS01380	0.923
CP258_RS03345	CP258_RS09855	0.923
CP258_RS02980	CP258_RS05100	0.923
CP258_RS03335	CP258_RS07550	0.923
CP258_RS03175	CP258_RS03105	0.923
CP258_RS02760	CP258_RS00475	0.923
CP258_RS04895	CP258_RS10390	0.923
CP258_RS02980	CP258_RS06875	0.923
CP258_RS03490	CP258_RS04190	0.923
CP258_RS03265	CP258_RS02585	0.923
CP258_RS02980	CP258_RS10625	0.923
CP258_RS03905	CP258_RS09920	0.923
CP258_RS04970	CP258_RS08230	0.923
CP258_RS03205	CP258_RS08620	0.922
CP258_RS03905	CP258_RS04175	0.922
CP258_RS03205	CP258_RS05390	0.922
CP258_RS02785	CP258_RS00300	0.922
CP258_RS02785	CP258_RS01575	0.922
CP258_RS03205	CP258_RS06580	0.922
CP258_RS03480	CP258_RS04080	0.922
CP258_RS02750	CP258_RS03915	0.922
CP258_RS03655	CP258_RS00825	0.922
CP258_RS03205	CP258_RS06520	0.922
CP258_RS02980	CP258_RS09260	0.922
CP258_RS05230	CP258_RS07545	0.922
CP258_RS03800	CP258_RS03205	0.922
CP258_RS03515	CP258_RS01575	0.922
CP258_RS03910	CP258_RS02720	0.922
CP258_RS05235	CP258_RS00830	0.922
CP258_RS03800	CP258_RS01735	0.922
CP258_RS03205	CP258_RS05025	0.922
CP258_RS03105	CP258_RS00855	0.922
CP258_RS03340	CP258_RS02715	0.922
CP258_RS02750	CP258_RS09210	0.922
CP258_RS03365	CP258_RS00460	0.922
CP258_RS02780	CP258_RS05605	0.922
CP258_RS02980	CP258_RS07180	0.922
CP258_RS03490	CP258_RS08805	0.922
CP258_RS02750	CP258_RS08870	0.922
CP258_RS02780	CP258_RS04760	0.922
CP258_RS02980	CP258_RS03545	0.922
CP258_RS03330	CP258_RS02340	0.922
CP258_RS02750	CP258_RS09335	0.922
CP258_RS03240	CP258_RS01375	0.922
CP258_RS03365	CP258_RS02550	0.922
CP258_RS02755	CP258_RS07220	0.922
CP258_RS03480	CP258_RS01845	0.921
CP258_RS03835	CP258_RS02955	0.921
CP258_RS04895	CP258_RS08900	0.921
CP258_RS04755	CP258_RS01380	0.921
CP258_RS03630	CP258_RS04705	0.921
CP258_RS03480	CP258_RS02130	0.921
CP258_RS03105	CP258_RS02300	0.921
CP258_RS02980	CP258_RS07125	0.921
CP258_RS03480	CP258_RS06665	0.921
CP258_RS05155	CP258_RS10785	0.921
CP258_RS03190	CP258_RS03270	0.921
CP258_RS02980	CP258_RS05275	0.921
CP258_RS03905	CP258_RS07365	0.921
CP258_RS02975	CP258_RS03455	0.921
CP258_RS02975	CP258_RS05285	0.921
CP258_RS02940	CP258_RS01120	0.921
CP258_RS03205	CP258_RS05050	0.921
CP258_RS02980	CP258_RS04060	0.921
CP258_RS04440	CP258_RS00105	0.921
CP258_RS02980	CP258_RS07185	0.921
CP258_RS02940	CP258_RS00300	0.921
CP258_RS04895	CP258_RS02940	0.921
CP258_RS02980	CP258_RS01405	0.921
CP258_RS02750	CP258_RS07305	0.921
CP258_RS02940	CP258_RS01810	0.921
CP258_RS03960	CP258_RS05405	0.921
CP258_RS04195	CP258_RS08680	0.921
CP258_RS02805	CP258_RS08810	0.921
CP258_RS03205	CP258_RS10745	0.921
CP258_RS03750	CP258_RS06365	0.921
CP258_RS03350	CP258_RS05345	0.921
CP258_RS03750	CP258_RS08025	0.92
CP258_RS03630	CP258_RS06925	0.92
CP258_RS03205	CP258_RS06590	0.92
CP258_RS03105	CP258_RS02280	0.92
CP258_RS03905	CP258_RS04660	0.92
CP258_RS03905	CP258_RS04135	0.92
CP258_RS03205	CP258_RS06110	0.92
CP258_RS02980	CP258_RS07900	0.92
CP258_RS03815	CP258_RS04280	0.92
CP258_RS02750	CP258_RS07180	0.92
CP258_RS03350	CP258_RS10140	0.92
CP258_RS03065	CP258_RS08900	0.92
CP258_RS03105	CP258_RS02845	0.92
CP258_RS02795	CP258_RS10250	0.92
CP258_RS02905	CP258_RS00440	0.92
CP258_RS02980	CP258_RS09045	0.92
CP258_RS03480	CP258_RS07650	0.92
CP258_RS03745	CP258_RS07005	0.92
CP258_RS02980	CP258_RS03550	0.92
CP258_RS02750	CP258_RS03020	0.92
CP258_RS05035	CP258_RS03105	0.92
CP258_RS02755	CP258_RS10685	0.92
CP258_RS05285	CP258_RS09065	0.92
CP258_RS03350	CP258_RS05525	0.92
CP258_RS00310	CP258_RS02980	0.92
CP258_RS02810	CP258_RS01920	0.92
CP258_RS03675	CP258_RS10560	0.92
CP258_RS03205	CP258_RS03735	0.92
CP258_RS02980	CP258_RS04210	0.919
CP258_RS02810	CP258_RS01235	0.919
CP258_RS03105	CP258_RS04980	0.919
CP258_RS03205	CP258_RS08240	0.919
CP258_RS02750	CP258_RS03040	0.919
CP258_RS03105	CP258_RS01545	0.919
CP258_RS03745	CP258_RS05420	0.919
CP258_RS03780	CP258_RS01685	0.919
CP258_RS03480	CP258_RS07090	0.919
CP258_RS02980	CP258_RS08770	0.919
CP258_RS03910	CP258_RS03770	0.919
CP258_RS02980	CP258_RS08730	0.919
CP258_RS02780	CP258_RS08090	0.919
CP258_RS02980	CP258_RS02845	0.919
CP258_RS03205	CP258_RS07055	0.919
CP258_RS03910	CP258_RS02145	0.919
CP258_RS03845	CP258_RS01865	0.919
CP258_RS03835	CP258_RS00590	0.919
CP258_RS03570	CP258_RS08805	0.919
CP258_RS02980	CP258_RS08340	0.919
CP258_RS02810	CP258_RS10685	0.919
CP258_RS02980	CP258_RS08120	0.919
CP258_RS04755	CP258_RS01390	0.919
CP258_RS02980	CP258_RS10165	0.919
CP258_RS02750	CP258_RS10475	0.919
CP258_RS02760	CP258_RS03415	0.919
CP258_RS03105	CP258_RS01300	0.919
CP258_RS03135	CP258_RS07830	0.919
CP258_RS03205	CP258_RS07880	0.918
CP258_RS03265	CP258_RS03770	0.918
CP258_RS02985	CP258_RS02260	0.918
CP258_RS03330	CP258_RS03080	0.918
CP258_RS02750	CP258_RS08010	0.918
CP258_RS03960	CP258_RS06935	0.918
CP258_RS05225	CP258_RS10705	0.918
CP258_RS02750	CP258_RS08100	0.918
CP258_RS03135	CP258_RS10345	0.918
CP258_RS03840	CP258_RS03255	0.918
CP258_RS02985	CP258_RS02840	0.918
CP258_RS03655	CP258_RS06470	0.918
CP258_RS03205	CP258_RS08450	0.918
CP258_RS03205	CP258_RS10395	0.918
CP258_RS02750	CP258_RS05870	0.918
CP258_RS02980	CP258_RS08360	0.918
CP258_RS03005	CP258_RS02370	0.918
CP258_RS03205	CP258_RS06690	0.918
CP258_RS03795	CP258_RS09955	0.918
CP258_RS02750	CP258_RS05670	0.918
CP258_RS02750	CP258_RS06445	0.918
CP258_RS03150	CP258_RS01575	0.918
CP258_RS03910	CP258_RS09405	0.918
CP258_RS02980	CP258_RS02110	0.918
CP258_RS03655	CP258_RS00620	0.918
CP258_RS03455	CP258_RS10160	0.918
CP258_RS02750	CP258_RS05845	0.918
CP258_RS02805	CP258_RS07220	0.918
CP258_RS02980	CP258_RS01420	0.918
CP258_RS03680	CP258_RS10380	0.918
CP258_RS04200	CP258_RS01820	0.918
CP258_RS03375	CP258_RS10230	0.918
CP258_RS02980	CP258_RS04810	0.918
CP258_RS03205	CP258_RS04325	0.918
CP258_RS03205	CP258_RS05030	0.918
CP258_RS03545	CP258_RS02550	0.918
CP258_RS03695	CP258_RS01250	0.918
CP258_RS03205	CP258_RS03930	0.918
CP258_RS03145	CP258_RS10785	0.918
CP258_RS03105	CP258_RS01135	0.918
CP258_RS02945	CP258_RS09525	0.918
CP258_RS05225	CP258_RS08230	0.918
CP258_RS02980	CP258_RS04885	0.918
CP258_RS03350	CP258_RS08090	0.918
CP258_RS02980	CP258_RS03090	0.918
CP258_RS03205	CP258_RS04465	0.918
CP258_RS03495	CP258_RS01250	0.918
CP258_RS03205	CP258_RS05865	0.918
CP258_RS04975	CP258_RS01760	0.917
CP258_RS02805	CP258_RS02710	0.917
CP258_RS04755	CP258_RS05575	0.917
CP258_RS02750	CP258_RS07185	0.917
CP258_RS03900	CP258_RS07545	0.917
CP258_RS02750	CP258_RS05255	0.917
CP258_RS02750	CP258_RS10755	0.917
CP258_RS05235	CP258_RS02835	0.917
CP258_RS03365	CP258_RS02750	0.917
CP258_RS03205	CP258_RS04480	0.917
CP258_RS03105	CP258_RS08355	0.917
CP258_RS04900	CP258_RS03205	0.917
CP258_RS03795	CP258_RS00295	0.917
CP258_RS02980	CP258_RS06495	0.917
CP258_RS03205	CP258_RS09365	0.917
CP258_RS02750	CP258_RS03370	0.917
CP258_RS02750	CP258_RS06555	0.917
CP258_RS03345	CP258_RS08800	0.917
CP258_RS05235	CP258_RS00590	0.917
CP258_RS05235	CP258_RS03220	0.917
CP258_RS02985	CP258_RS01140	0.917
CP258_RS03330	CP258_RS06900	0.917
CP258_RS03200	CP258_RS00865	0.917
CP258_RS02945	CP258_RS09280	0.917
CP258_RS02980	CP258_RS04390	0.917
CP258_RS03090	CP258_RS02980	0.917
CP258_RS03145	CP258_RS04715	0.917
CP258_RS03205	CP258_RS04305	0.917
CP258_RS05235	CP258_RS02885	0.917
CP258_RS03515	CP258_RS07830	0.917
CP258_RS03340	CP258_RS00420	0.917
CP258_RS02945	CP258_RS06145	0.917
CP258_RS02985	CP258_RS01645	0.917
CP258_RS02750	CP258_RS06245	0.916
CP258_RS03615	CP258_RS09885	0.916
CP258_RS03205	CP258_RS05395	0.916
CP258_RS03910	CP258_RS02585	0.916
CP258_RS02780	CP258_RS08305	0.916
CP258_RS02980	CP258_RS08110	0.916
CP258_RS04440	CP258_RS04115	0.916
CP258_RS03545	CP258_RS03105	0.916
CP258_RS03480	CP258_RS02740	0.916
CP258_RS02750	CP258_RS04870	0.916
CP258_RS03330	CP258_RS02470	0.916
CP258_RS05160	CP258_RS03590	0.916
CP258_RS03480	CP258_RS07995	0.916
CP258_RS03345	CP258_RS08425	0.916
CP258_RS03350	CP258_RS07720	0.916
CP258_RS02980	CP258_RS07990	0.916
CP258_RS05170	CP258_RS00300	0.916
CP258_RS03185	CP258_RS00460	0.916
CP258_RS02985	CP258_RS01500	0.916
CP258_RS03205	CP258_RS05945	0.916
CP258_RS02805	CP258_RS03200	0.916
CP258_RS02980	CP258_RS07145	0.916
CP258_RS04575	CP258_RS09400	0.916
CP258_RS03350	CP258_RS06685	0.916
CP258_RS02985	CP258_RS01355	0.916
CP258_RS03665	CP258_RS10235	0.916
CP258_RS04900	CP258_RS01735	0.916
CP258_RS04755	CP258_RS05235	0.916
CP258_RS03330	CP258_RS02830	0.916
CP258_RS03105	CP258_RS02245	0.916
CP258_RS02850	CP258_RS07545	0.916
CP258_RS02980	CP258_RS10095	0.916
CP258_RS03835	CP258_RS10730	0.916
CP258_RS02750	CP258_RS09860	0.916
CP258_RS04280	CP258_RS03030	0.916
CP258_RS02980	CP258_RS03450	0.916
CP258_RS02750	CP258_RS10095	0.916
CP258_RS04540	CP258_RS04280	0.916
CP258_RS02980	CP258_RS06405	0.916
CP258_RS02980	CP258_RS01545	0.916
CP258_RS02955	CP258_RS05575	0.916
CP258_RS03750	CP258_RS04435	0.916
CP258_RS03940	CP258_RS09645	0.916
CP258_RS02785	CP258_RS00325	0.916
CP258_RS03135	CP258_RS08810	0.916
CP258_RS03480	CP258_RS04555	0.915
CP258_RS02750	CP258_RS03865	0.915
CP258_RS02980	CP258_RS00775	0.915
CP258_RS02755	CP258_RS08760	0.915
CP258_RS03515	CP258_RS03200	0.915
CP258_RS03205	CP258_RS04400	0.915
CP258_RS03745	CP258_RS08065	0.915
CP258_RS02985	CP258_RS02440	0.915
CP258_RS03480	CP258_RS02175	0.915
CP258_RS04090	CP258_RS06935	0.915
CP258_RS02980	CP258_RS07115	0.915
CP258_RS03205	CP258_RS05330	0.915
CP258_RS03910	CP258_RS08165	0.915
CP258_RS02930	CP258_RS02555	0.915
CP258_RS03105	CP258_RS09335	0.915
CP258_RS02755	CP258_RS04435	0.915
CP258_RS03710	CP258_RS10235	0.915
CP258_RS03150	CP258_RS00980	0.915
CP258_RS04750	CP258_RS08025	0.915
CP258_RS02750	CP258_RS02855	0.915
CP258_RS03265	CP258_RS00660	0.915
CP258_RS03580	CP258_RS02550	0.915
CP258_RS03475	CP258_RS00815	0.915
CP258_RS02980	CP258_RS02300	0.915
CP258_RS03075	CP258_RS10250	0.915
CP258_RS02750	CP258_RS09810	0.915
CP258_RS04280	CP258_RS01775	0.915
CP258_RS02835	CP258_RS10390	0.915
CP258_RS04895	CP258_RS04750	0.915
CP258_RS03345	CP258_RS08980	0.915
CP258_RS03475	CP258_RS07605	0.915
CP258_RS03205	CP258_RS08145	0.915
CP258_RS02760	CP258_RS09445	0.915
CP258_RS02985	CP258_RS00210	0.915
CP258_RS02780	CP258_RS00725	0.915
CP258_RS04280	CP258_RS03970	0.915
CP258_RS03005	CP258_RS00545	0.915
CP258_RS03480	CP258_RS04130	0.915
CP258_RS03205	CP258_RS05565	0.915
CP258_RS03455	CP258_RS04800	0.915
CP258_RS03480	CP258_RS05700	0.915
CP258_RS02750	CP258_RS10795	0.915
CP258_RS05225	CP258_RS10510	0.914
CP258_RS05175	CP258_RS06185	0.914
CP258_RS03205	CP258_RS06250	0.914
CP258_RS03850	CP258_RS00460	0.914
CP258_RS03145	CP258_RS08975	0.914
CP258_RS03205	CP258_RS05785	0.914
CP258_RS04750	CP258_RS10160	0.914
CP258_RS02980	CP258_RS09210	0.914
CP258_RS02750	CP258_RS07745	0.914
CP258_RS05170	CP258_RS01895	0.914
CP258_RS04280	CP258_RS01230	0.914
CP258_RS03265	CP258_RS02065	0.914
CP258_RS03830	CP258_RS07385	0.914
CP258_RS03265	CP258_RS02145	0.914
CP258_RS03640	CP258_RS08200	0.914
CP258_RS03475	CP258_RS03785	0.914
CP258_RS04580	CP258_RS04085	0.914
CP258_RS03785	CP258_RS00910	0.914
CP258_RS03585	CP258_RS00275	0.914
CP258_RS02980	CP258_RS01795	0.914
CP258_RS02980	CP258_RS03010	0.914
CP258_RS03815	CP258_RS10555	0.914
CP258_RS02750	CP258_RS05245	0.914
CP258_RS05105	CP258_RS00985	0.914
CP258_RS03755	CP258_RS02360	0.914
CP258_RS02950	CP258_RS10610	0.914
CP258_RS03480	CP258_RS05650	0.914
CP258_RS02955	CP258_RS00985	0.914
CP258_RS02750	CP258_RS05440	0.914
CP258_RS02980	CP258_RS05750	0.914
CP258_RS03200	CP258_RS06960	0.914
CP258_RS03350	CP258_RS09830	0.914
CP258_RS03725	CP258_RS10230	0.914
CP258_RS03475	CP258_RS00225	0.914
CP258_RS02750	CP258_RS05455	0.914
CP258_RS02980	CP258_RS07540	0.914
CP258_RS04085	CP258_RS01815	0.914
CP258_RS04750	CP258_RS09065	0.914
CP258_RS04125	CP258_RS01900	0.914
CP258_RS02980	CP258_RS04935	0.914
CP258_RS04175	CP258_RS07470	0.914
CP258_RS02810	CP258_RS00875	0.914
CP258_RS03105	CP258_RS01475	0.914
CP258_RS05385	CP258_RS08975	0.913
CP258_RS03205	CP258_RS04740	0.913
CP258_RS02980	CP258_RS01365	0.913
CP258_RS03360	CP258_RS10230	0.913
CP258_RS02945	CP258_RS07910	0.913
CP258_RS05300	CP258_RS10555	0.913
CP258_RS04755	CP258_RS07530	0.913
CP258_RS03570	CP258_RS04190	0.913
CP258_RS02980	CP258_RS05120	0.913
CP258_RS03745	CP258_RS10150	0.913
CP258_RS03105	CP258_RS00025	0.913
CP258_RS03720	CP258_RS07830	0.913
CP258_RS02750	CP258_RS08110	0.913
CP258_RS03260	CP258_RS03475	0.913
CP258_RS03205	CP258_RS06040	0.913
CP258_RS04865	CP258_RS03205	0.913
CP258_RS02750	CP258_RS10060	0.913
CP258_RS03910	CP258_RS00425	0.913
CP258_RS03905	CP258_RS03750	0.913
CP258_RS03835	CP258_RS02415	0.913
CP258_RS03205	CP258_RS05210	0.913
CP258_RS03480	CP258_RS07520	0.913
CP258_RS03635	CP258_RS07845	0.913
CP258_RS02750	CP258_RS05740	0.913
CP258_RS02750	CP258_RS05830	0.913
CP258_RS02980	CP258_RS05830	0.913
CP258_RS02780	CP258_RS10675	0.913
CP258_RS03655	CP258_RS02150	0.913
CP258_RS02750	CP258_RS04510	0.913
CP258_RS02980	CP258_RS05440	0.913
CP258_RS02980	CP258_RS05430	0.913
CP258_RS03480	CP258_RS08350	0.913
CP258_RS02755	CP258_RS06365	0.912
CP258_RS03895	CP258_RS09875	0.912
CP258_RS02750	CP258_RS03850	0.912
CP258_RS02980	CP258_RS05205	0.912
CP258_RS03200	CP258_RS00530	0.912
CP258_RS02980	CP258_RS07170	0.912
CP258_RS03455	CP258_RS06370	0.912
CP258_RS02780	CP258_RS03315	0.912
CP258_RS03890	CP258_RS00965	0.912
CP258_RS02980	CP258_RS02645	0.912
CP258_RS02980	CP258_RS08660	0.912
CP258_RS02750	CP258_RS09385	0.912
CP258_RS02980	CP258_RS07305	0.912
CP258_RS02780	CP258_RS07010	0.912
CP258_RS02750	CP258_RS04955	0.912
CP258_RS03905	CP258_RS09395	0.912
CP258_RS03345	CP258_RS09690	0.912
CP258_RS03480	CP258_RS05250	0.912
CP258_RS02780	CP258_RS07945	0.912
CP258_RS02750	CP258_RS06340	0.912
CP258_RS02980	CP258_RS05435	0.912
CP258_RS02980	CP258_RS08100	0.912
CP258_RS03890	CP258_RS02490	0.912
CP258_RS02780	CP258_RS00595	0.912
CP258_RS05105	CP258_RS02810	0.912
CP258_RS03200	CP258_RS02805	0.912
CP258_RS03240	CP258_RS08020	0.912
CP258_RS03600	CP258_RS01735	0.912
CP258_RS02805	CP258_RS03480	0.912
CP258_RS03390	CP258_RS02710	0.912
CP258_RS00085	CP258_RS10765	0.912
CP258_RS03075	CP258_RS09875	0.912
CP258_RS03830	CP258_RS04700	0.912
CP258_RS04975	CP258_RS01010	0.912
CP258_RS02955	CP258_RS01380	0.912
CP258_RS03435	CP258_RS01735	0.912
CP258_RS03675	CP258_RS06905	0.912
CP258_RS03455	CP258_RS08410	0.912
CP258_RS02955	CP258_RS07530	0.912
CP258_RS04750	CP258_RS06365	0.912
CP258_RS05235	CP258_RS02415	0.912
CP258_RS03080	CP258_RS09790	0.912
CP258_RS03390	CP258_RS03200	0.912
CP258_RS00985	CP258_RS04940	0.911
CP258_RS02975	CP258_RS06295	0.911
CP258_RS03905	CP258_RS08215	0.911
CP258_RS02780	CP258_RS00765	0.911
CP258_RS02780	CP258_RS06360	0.911
CP258_RS02980	CP258_RS01480	0.911
CP258_RS03475	CP258_RS01765	0.911
CP258_RS03480	CP258_RS05775	0.911
CP258_RS03515	CP258_RS10305	0.911
CP258_RS02750	CP258_RS04290	0.911
CP258_RS02750	CP258_RS07325	0.911
CP258_RS05235	CP258_RS00580	0.911
CP258_RS02980	CP258_RS05245	0.911
CP258_RS02750	CP258_RS07615	0.911
CP258_RS04625	CP258_RS02415	0.911
CP258_RS02750	CP258_RS10665	0.911
CP258_RS02750	CP258_RS04925	0.911
CP258_RS04125	CP258_RS00300	0.911
CP258_RS05160	CP258_RS06550	0.911
CP258_RS03835	CP258_RS02975	0.911
CP258_RS02750	CP258_RS06205	0.911
CP258_RS02755	CP258_RS03905	0.911
CP258_RS05170	CP258_RS00875	0.911
CP258_RS02750	CP258_RS05655	0.911
CP258_RS02750	CP258_RS06420	0.911
CP258_RS02750	CP258_RS05590	0.911
CP258_RS03750	CP258_RS03905	0.911
CP258_RS02835	CP258_RS05235	0.911
CP258_RS02750	CP258_RS04985	0.911
CP258_RS02780	CP258_RS07695	0.911
CP258_RS03065	CP258_RS10785	0.911
CP258_RS02750	CP258_RS05190	0.911
CP258_RS02750	CP258_RS06855	0.911
CP258_RS03770	CP258_RS09480	0.911
CP258_RS02750	CP258_RS05095	0.911
CP258_RS03070	CP258_RS01345	0.911
CP258_RS03745	CP258_RS07010	0.911
CP258_RS02750	CP258_RS06985	0.911
CP258_RS03455	CP258_RS09815	0.911
CP258_RS02750	CP258_RS05920	0.911
CP258_RS03495	CP258_RS03105	0.911
CP258_RS05160	CP258_RS01915	0.911
CP258_RS02750	CP258_RS09915	0.911
CP258_RS03235	CP258_RS04840	0.911
CP258_RS05235	CP258_RS01920	0.911
CP258_RS02750	CP258_RS09705	0.911
CP258_RS04580	CP258_RS03410	0.911
CP258_RS04800	CP258_RS09920	0.911
CP258_RS03365	CP258_RS01250	0.911
CP258_RS03745	CP258_RS07665	0.911
CP258_RS03205	CP258_RS05310	0.911
CP258_RS02750	CP258_RS10185	0.911
CP258_RS02780	CP258_RS01240	0.911
CP258_RS03265	CP258_RS02720	0.911
CP258_RS03345	CP258_RS03505	0.91
CP258_RS03175	CP258_RS01250	0.91
CP258_RS02980	CP258_RS07315	0.91
CP258_RS03710	CP258_RS07545	0.91
CP258_RS02810	CP258_RS01895	0.91
CP258_RS03835	CP258_RS05530	0.91
CP258_RS02750	CP258_RS04930	0.91
CP258_RS03455	CP258_RS10175	0.91
CP258_RS02980	CP258_RS09850	0.91
CP258_RS03205	CP258_RS07175	0.91
CP258_RS03020	CP258_RS00460	0.91
CP258_RS02980	CP258_RS02275	0.91
CP258_RS04970	CP258_RS07525	0.91
CP258_RS03910	CP258_RS04785	0.91
CP258_RS02980	CP258_RS00960	0.91
CP258_RS03830	CP258_RS06380	0.91
CP258_RS04625	CP258_RS03170	0.91
CP258_RS02980	CP258_RS03915	0.91
CP258_RS05225	CP258_RS10515	0.91
CP258_RS02780	CP258_RS08160	0.91
CP258_RS02835	CP258_RS05575	0.91
CP258_RS02750	CP258_RS09520	0.91
CP258_RS03350	CP258_RS05420	0.91
CP258_RS00910	CP258_RS00230	0.91
CP258_RS02980	CP258_RS06570	0.91
CP258_RS03040	CP258_RS06905	0.91
CP258_RS02750	CP258_RS06220	0.91
CP258_RS02780	CP258_RS04295	0.91
CP258_RS02750	CP258_RS09240	0.91
CP258_RS03830	CP258_RS10570	0.91
CP258_RS02750	CP258_RS04485	0.91
CP258_RS05105	CP258_RS02505	0.91
CP258_RS03175	CP258_RS02750	0.91
CP258_RS03330	CP258_RS02190	0.91
CP258_RS02750	CP258_RS10065	0.91
CP258_RS03455	CP258_RS04895	0.91
CP258_RS04040	CP258_RS03330	0.91
CP258_RS02750	CP258_RS04025	0.91
CP258_RS04325	CP258_RS03205	0.91
CP258_RS02780	CP258_RS05345	0.91
CP258_RS02985	CP258_RS02500	0.91
CP258_RS04005	CP258_RS01890	0.909
CP258_RS02785	CP258_RS02710	0.909
CP258_RS02980	CP258_RS07575	0.909
CP258_RS03325	CP258_RS03745	0.909
CP258_RS02810	CP258_RS04895	0.909
CP258_RS02750	CP258_RS06695	0.909
CP258_RS03570	CP258_RS07960	0.909
CP258_RS02750	CP258_RS07590	0.909
CP258_RS04895	CP258_RS05575	0.909
CP258_RS02980	CP258_RS07745	0.909
CP258_RS03475	CP258_RS07555	0.909
CP258_RS05030	CP258_RS07545	0.909
CP258_RS02750	CP258_RS06570	0.909
CP258_RS03480	CP258_RS07060	0.909
CP258_RS03205	CP258_RS07775	0.909
CP258_RS03105	CP258_RS02765	0.909
CP258_RS05225	CP258_RS08645	0.909
CP258_RS02750	CP258_RS09440	0.909
CP258_RS05130	CP258_RS02990	0.909
CP258_RS03695	CP258_RS02750	0.909
CP258_RS03240	CP258_RS02445	0.909
CP258_RS05235	CP258_RS01610	0.909
CP258_RS03480	CP258_RS06835	0.909
CP258_RS02750	CP258_RS03920	0.909
CP258_RS02750	CP258_RS04545	0.909
CP258_RS02750	CP258_RS06785	0.909
CP258_RS02780	CP258_RS05075	0.909
CP258_RS03850	CP258_RS07550	0.909
CP258_RS02750	CP258_RS07020	0.909
CP258_RS02750	CP258_RS10020	0.909
CP258_RS03235	CP258_RS09985	0.909
CP258_RS02750	CP258_RS04860	0.909
CP258_RS02980	CP258_RS02230	0.909
CP258_RS02980	CP258_RS06315	0.909
CP258_RS02750	CP258_RS07300	0.909
CP258_RS03750	CP258_RS10245	0.909
CP258_RS03475	CP258_RS01670	0.909
CP258_RS03070	CP258_RS01570	0.909
CP258_RS03330	CP258_RS09120	0.909
CP258_RS03105	CP258_RS02225	0.909
CP258_RS02780	CP258_RS05885	0.909
CP258_RS02750	CP258_RS04330	0.909
CP258_RS02750	CP258_RS04250	0.909
CP258_RS05085	CP258_RS02550	0.909
CP258_RS05170	CP258_RS03905	0.909
CP258_RS03205	CP258_RS09220	0.909
CP258_RS02750	CP258_RS07170	0.909
CP258_RS03200	CP258_RS02060	0.909
CP258_RS03350	CP258_RS05410	0.908
CP258_RS02750	CP258_RS10335	0.908
CP258_RS02750	CP258_RS07045	0.908
CP258_RS02750	CP258_RS08105	0.908
CP258_RS03205	CP258_RS03575	0.908
CP258_RS02750	CP258_RS07415	0.908
CP258_RS02980	CP258_RS02205	0.908
CP258_RS02750	CP258_RS07760	0.908
CP258_RS03270	CP258_RS02990	0.908
CP258_RS03205	CP258_RS09700	0.908
CP258_RS03580	CP258_RS08805	0.908
CP258_RS03090	CP258_RS02750	0.908
CP258_RS03105	CP258_RS02290	0.908
CP258_RS02780	CP258_RS08065	0.908
CP258_RS03065	CP258_RS04625	0.908
CP258_RS04280	CP258_RS00240	0.908
CP258_RS03905	CP258_RS04495	0.908
CP258_RS05225	CP258_RS06285	0.908
CP258_RS04585	CP258_RS10555	0.908
CP258_RS02835	CP258_RS07230	0.908
CP258_RS02985	CP258_RS00570	0.908
CP258_RS03515	CP258_RS10345	0.908
CP258_RS02980	CP258_RS08460	0.908
CP258_RS03205	CP258_RS05150	0.908
CP258_RS04970	CP258_RS05515	0.908
CP258_RS02980	CP258_RS00220	0.908
CP258_RS02750	CP258_RS05280	0.908
CP258_RS02750	CP258_RS05290	0.908
CP258_RS05150	CP258_RS07545	0.908
CP258_RS05285	CP258_RS10245	0.908
CP258_RS03480	CP258_RS09855	0.908
CP258_RS02750	CP258_RS03365	0.908
CP258_RS02980	CP258_RS09080	0.908
CP258_RS02980	CP258_RS05560	0.908
CP258_RS03750	CP258_RS01810	0.908
CP258_RS04710	CP258_RS02995	0.908
CP258_RS03265	CP258_RS09500	0.908
CP258_RS02980	CP258_RS10755	0.908
CP258_RS02755	CP258_RS10090	0.908
CP258_RS02750	CP258_RS03560	0.908
CP258_RS02980	CP258_RS02035	0.908
CP258_RS02980	CP258_RS09905	0.908
CP258_RS05160	CP258_RS02070	0.908
CP258_RS02980	CP258_RS05670	0.908
CP258_RS02980	CP258_RS05765	0.908
CP258_RS02985	CP258_RS02645	0.908
CP258_RS02995	CP258_RS03750	0.908
CP258_RS03350	CP258_RS03315	0.908
CP258_RS03480	CP258_RS09200	0.908
CP258_RS02750	CP258_RS05185	0.908
CP258_RS03245	CP258_RS00275	0.908
CP258_RS03455	CP258_RS05295	0.908
CP258_RS02835	CP258_RS07530	0.907
CP258_RS04755	CP258_RS06160	0.907
CP258_RS03105	CP258_RS00115	0.907
CP258_RS02750	CP258_RS09935	0.907
CP258_RS02750	CP258_RS09905	0.907
CP258_RS05160	CP258_RS00345	0.907
CP258_RS02835	CP258_RS08970	0.907
CP258_RS02785	CP258_RS01810	0.907
CP258_RS02945	CP258_RS08135	0.907
CP258_RS05160	CP258_RS02340	0.907
CP258_RS02980	CP258_RS00720	0.907
CP258_RS02945	CP258_RS08125	0.907
CP258_RS02980	CP258_RS02765	0.907
CP258_RS03205	CP258_RS08475	0.907
CP258_RS03885	CP258_RS07545	0.907
CP258_RS02750	CP258_RS07505	0.907
CP258_RS04195	CP258_RS03080	0.907
CP258_RS02750	CP258_RS04105	0.907
CP258_RS03205	CP258_RS10810	0.907
CP258_RS04050	CP258_RS02980	0.907
CP258_RS03795	CP258_RS09360	0.907
CP258_RS02945	CP258_RS10195	0.907
CP258_RS02875	CP258_RS00460	0.907
CP258_RS02985	CP258_RS05725	0.907
CP258_RS03105	CP258_RS01455	0.907
CP258_RS02750	CP258_RS07280	0.907
CP258_RS02780	CP258_RS07350	0.907
CP258_RS02980	CP258_RS03295	0.907
CP258_RS03770	CP258_RS07710	0.907
CP258_RS03640	CP258_RS08900	0.907
CP258_RS02750	CP258_RS06495	0.907
CP258_RS03220	CP258_RS02555	0.907
CP258_RS00075	CP258_RS01925	0.907
CP258_RS02980	CP258_RS03685	0.907
CP258_RS02750	CP258_RS06405	0.907
CP258_RS04135	CP258_RS01920	0.907
CP258_RS02750	CP258_RS06235	0.907
CP258_RS02750	CP258_RS05750	0.907
CP258_RS02750	CP258_RS05795	0.907
CP258_RS02980	CP258_RS03675	0.907
CP258_RS02980	CP258_RS06630	0.907
CP258_RS02795	CP258_RS09875	0.907
CP258_RS03200	CP258_RS01850	0.907
CP258_RS04280	CP258_RS01400	0.907
CP258_RS05105	CP258_RS03455	0.907
CP258_RS02750	CP258_RS07790	0.907
CP258_RS03205	CP258_RS04550	0.907
CP258_RS02980	CP258_RS08670	0.907
CP258_RS02750	CP258_RS05080	0.907
CP258_RS04120	CP258_RS06365	0.907
CP258_RS03205	CP258_RS04425	0.907
CP258_RS02750	CP258_RS05450	0.907
CP258_RS02750	CP258_RS03175	0.907
CP258_RS02750	CP258_RS03300	0.907
CP258_RS02980	CP258_RS05835	0.907
CP258_RS05390	CP258_RS01735	0.906
CP258_RS02780	CP258_RS02935	0.906
CP258_RS02780	CP258_RS01885	0.906
CP258_RS03480	CP258_RS05685	0.906
CP258_RS03685	CP258_RS02550	0.906
CP258_RS03390	CP258_RS01900	0.906
CP258_RS03765	CP258_RS02760	0.906
CP258_RS05250	CP258_RS09305	0.906
CP258_RS04970	CP258_RS07530	0.906
CP258_RS02985	CP258_RS00025	0.906
CP258_RS05385	CP258_RS08900	0.906
CP258_RS03580	CP258_RS06905	0.906
CP258_RS02980	CP258_RS07020	0.906
CP258_RS03575	CP258_RS10235	0.906
CP258_RS04730	CP258_RS03205	0.906
CP258_RS03505	CP258_RS07050	0.906
CP258_RS03830	CP258_RS09910	0.906
CP258_RS03150	CP258_RS02710	0.906
CP258_RS04850	CP258_RS08805	0.906
CP258_RS02750	CP258_RS10115	0.906
CP258_RS02750	CP258_RS04885	0.906
CP258_RS02750	CP258_RS04980	0.906
CP258_RS02980	CP258_RS07565	0.906
CP258_RS02750	CP258_RS05220	0.906
CP258_RS04120	CP258_RS10160	0.906
CP258_RS02750	CP258_RS05355	0.906
CP258_RS02980	CP258_RS07670	0.906
CP258_RS02780	CP258_RS09830	0.906
CP258_RS02750	CP258_RS05435	0.906
CP258_RS04895	CP258_RS10455	0.906
CP258_RS03350	CP258_RS01100	0.906
CP258_RS03910	CP258_RS02350	0.906
CP258_RS02870	CP258_RS03205	0.906
CP258_RS03570	CP258_RS06905	0.906
CP258_RS02980	CP258_RS05995	0.906
CP258_RS02750	CP258_RS06075	0.906
CP258_RS03005	CP258_RS00965	0.906
CP258_RS02975	CP258_RS09015	0.906
CP258_RS02750	CP258_RS04920	0.906
CP258_RS02750	CP258_RS05090	0.906
CP258_RS02980	CP258_RS09290	0.906
CP258_RS02750	CP258_RS07155	0.906
CP258_RS02980	CP258_RS05325	0.906
CP258_RS02780	CP258_RS05110	0.906
CP258_RS04050	CP258_RS02550	0.906
CP258_RS02980	CP258_RS07300	0.906
CP258_RS02750	CP258_RS04445	0.906
CP258_RS02750	CP258_RS04565	0.906
CP258_RS02750	CP258_RS04680	0.906
CP258_RS04115	CP258_RS06375	0.906
CP258_RS02980	CP258_RS09680	0.906
CP258_RS03075	CP258_RS03330	0.906
CP258_RS02980	CP258_RS01410	0.906
CP258_RS04345	CP258_RS01025	0.906
CP258_RS00930	CP258_RS05530	0.905
CP258_RS02980	CP258_RS03920	0.905
CP258_RS02980	CP258_RS06000	0.905
CP258_RS03265	CP258_RS00730	0.905
CP258_RS03340	CP258_RS01955	0.905
CP258_RS03480	CP258_RS10215	0.905
CP258_RS03800	CP258_RS07545	0.905
CP258_RS03855	CP258_RS00715	0.905
CP258_RS03240	CP258_RS00465	0.905
CP258_RS02780	CP258_RS02105	0.905
CP258_RS03180	CP258_RS04840	0.905
CP258_RS00075	CP258_RS05405	0.905
CP258_RS03350	CP258_RS00415	0.905
CP258_RS04280	CP258_RS02265	0.905
CP258_RS02780	CP258_RS00820	0.905
CP258_RS02750	CP258_RS07115	0.905
CP258_RS04760	CP258_RS02780	0.905
CP258_RS03350	CP258_RS08405	0.905
CP258_RS02750	CP258_RS07360	0.905
CP258_RS03480	CP258_RS07755	0.905
CP258_RS02750	CP258_RS07125	0.905
CP258_RS04190	CP258_RS05725	0.905
CP258_RS02750	CP258_RS05635	0.905
CP258_RS02750	CP258_RS05430	0.905
CP258_RS03745	CP258_RS04950	0.905
CP258_RS02750	CP258_RS04775	0.905
CP258_RS02750	CP258_RS04650	0.905
CP258_RS02750	CP258_RS04375	0.905
CP258_RS03205	CP258_RS07785	0.905
CP258_RS02985	CP258_RS02465	0.905
CP258_RS05405	CP258_RS00075	0.905
CP258_RS02750	CP258_RS03445	0.905
CP258_RS02980	CP258_RS00915	0.905
CP258_RS02985	CP258_RS02035	0.905
CP258_RS03960	CP258_RS08640	0.905
CP258_RS02750	CP258_RS03010	0.905
CP258_RS02980	CP258_RS10795	0.905
CP258_RS03745	CP258_RS08635	0.905
CP258_RS03915	CP258_RS03105	0.905
CP258_RS03085	CP258_RS08825	0.905
CP258_RS02750	CP258_RS03550	0.905
CP258_RS02750	CP258_RS08120	0.905
CP258_RS02780	CP258_RS02915	0.905
CP258_RS02980	CP258_RS06790	0.905
CP258_RS02750	CP258_RS08885	0.905
CP258_RS03240	CP258_RS02360	0.905
CP258_RS05325	CP258_RS07550	0.905
CP258_RS02975	CP258_RS08230	0.904
CP258_RS03630	CP258_RS08905	0.904
CP258_RS02975	CP258_RS08900	0.904
CP258_RS05140	CP258_RS07545	0.904
CP258_RS02985	CP258_RS02545	0.904
CP258_RS03835	CP258_RS01920	0.904
CP258_RS03455	CP258_RS10685	0.904
CP258_RS02750	CP258_RS04405	0.904
CP258_RS03780	CP258_RS05965	0.904
CP258_RS05235	CP258_RS02085	0.904
CP258_RS02970	CP258_RS00275	0.904
CP258_RS02750	CP258_RS05545	0.904
CP258_RS02750	CP258_RS03545	0.904
CP258_RS03215	CP258_RS00715	0.904
CP258_RS02750	CP258_RS08595	0.904
CP258_RS04120	CP258_RS04435	0.904
CP258_RS02980	CP258_RS09135	0.904
CP258_RS02980	CP258_RS09230	0.904
CP258_RS04080	CP258_RS09305	0.904
CP258_RS03830	CP258_RS08780	0.904
CP258_RS04750	CP258_RS07470	0.904
CP258_RS03480	CP258_RS05215	0.904
CP258_RS02980	CP258_RS05745	0.904
CP258_RS02975	CP258_RS04120	0.904
CP258_RS04730	CP258_RS01735	0.904
CP258_RS03525	CP258_RS00925	0.904
CP258_RS03910	CP258_RS08440	0.904
CP258_RS02750	CP258_RS05100	0.904
CP258_RS02980	CP258_RS00755	0.904
CP258_RS02985	CP258_RS02895	0.904
CP258_RS02750	CP258_RS06200	0.904
CP258_RS03615	CP258_RS10715	0.904
CP258_RS02925	CP258_RS00760	0.904
CP258_RS03855	CP258_RS07960	0.904
CP258_RS03265	CP258_RS00320	0.904
CP258_RS03480	CP258_RS10700	0.904
CP258_RS02750	CP258_RS07285	0.904
CP258_RS02750	CP258_RS07245	0.904
CP258_RS03345	CP258_RS08655	0.904
CP258_RS03090	CP258_RS00715	0.904
CP258_RS00070	CP258_RS00460	0.904
CP258_RS02905	CP258_RS08335	0.904
CP258_RS02750	CP258_RS07825	0.904
CP258_RS03840	CP258_RS00440	0.904
CP258_RS04280	CP258_RS05975	0.904
CP258_RS04895	CP258_RS10300	0.904
CP258_RS03615	CP258_RS08665	0.904
CP258_RS03330	CP258_RS00810	0.904
CP258_RS04895	CP258_RS04120	0.904
CP258_RS02750	CP258_RS06385	0.904
CP258_RS02750	CP258_RS09230	0.904
CP258_RS02980	CP258_RS00855	0.904
CP258_RS02750	CP258_RS04210	0.903
CP258_RS02980	CP258_RS10750	0.903
CP258_RS03140	CP258_RS02760	0.903
CP258_RS02980	CP258_RS05290	0.903
CP258_RS03200	CP258_RS00885	0.903
CP258_RS03580	CP258_RS07960	0.903
CP258_RS00930	CP258_RS02415	0.903
CP258_RS03360	CP258_RS10235	0.903
CP258_RS02750	CP258_RS03685	0.903
CP258_RS03745	CP258_RS09830	0.903
CP258_RS02980	CP258_RS09440	0.903
CP258_RS02985	CP258_RS01800	0.903
CP258_RS04435	CP258_RS04120	0.903
CP258_RS02790	CP258_RS10345	0.903
CP258_RS04440	CP258_RS02180	0.903
CP258_RS02750	CP258_RS02895	0.903
CP258_RS02780	CP258_RS03005	0.903
CP258_RS04435	CP258_RS01095	0.903
CP258_RS02750	CP258_RS08660	0.903
CP258_RS02980	CP258_RS03225	0.903
CP258_RS02750	CP258_RS09575	0.903
CP258_RS05385	CP258_RS07390	0.903
CP258_RS03510	CP258_RS10155	0.903
CP258_RS03480	CP258_RS03465	0.903
CP258_RS04975	CP258_RS02780	0.903
CP258_RS05185	CP258_RS03105	0.903
CP258_RS05405	CP258_RS03030	0.903
CP258_RS05235	CP258_RS04970	0.903
CP258_RS02980	CP258_RS08005	0.903
CP258_RS03040	CP258_RS04190	0.903
CP258_RS03180	CP258_RS00840	0.903
CP258_RS02980	CP258_RS06130	0.903
CP258_RS03905	CP258_RS10390	0.903
CP258_RS03330	CP258_RS01040	0.903
CP258_RS02750	CP258_RS06850	0.903
CP258_RS02835	CP258_RS06160	0.903
CP258_RS02750	CP258_RS08130	0.903
CP258_RS05170	CP258_RS02685	0.903
CP258_RS02750	CP258_RS10320	0.903
CP258_RS03170	CP258_RS04715	0.903
CP258_RS02865	CP258_RS07545	0.903
CP258_RS03905	CP258_RS07225	0.903
CP258_RS04970	CP258_RS06160	0.903
CP258_RS02750	CP258_RS06000	0.903
CP258_RS02980	CP258_RS03370	0.903
CP258_RS03345	CP258_RS04130	0.903
CP258_RS02810	CP258_RS03905	0.903
CP258_RS03515	CP258_RS09305	0.903
CP258_RS03475	CP258_RS09775	0.903
CP258_RS02810	CP258_RS01810	0.903
CP258_RS02980	CP258_RS03870	0.903
CP258_RS04120	CP258_RS05105	0.903
CP258_RS04080	CP258_RS08810	0.903
CP258_RS02750	CP258_RS05275	0.903
CP258_RS03545	CP258_RS02980	0.903
CP258_RS02750	CP258_RS08360	0.903
CP258_RS03205	CP258_RS09245	0.903
CP258_RS02980	CP258_RS08595	0.903
CP258_RS03645	CP258_RS05880	0.903
CP258_RS03325	CP258_RS02370	0.902
CP258_RS02785	CP258_RS00980	0.902
CP258_RS03780	CP258_RS09645	0.902
CP258_RS02835	CP258_RS10300	0.902
CP258_RS02780	CP258_RS09295	0.902
CP258_RS03840	CP258_RS02520	0.902
CP258_RS03795	CP258_RS10385	0.902
CP258_RS02975	CP258_RS10510	0.902
CP258_RS02780	CP258_RS07665	0.902
CP258_RS03345	CP258_RS09620	0.902
CP258_RS03445	CP258_RS04205	0.902
CP258_RS03345	CP258_RS05610	0.902
CP258_RS02980	CP258_RS00485	0.902
CP258_RS03150	CP258_RS01900	0.902
CP258_RS03105	CP258_RS02310	0.902
CP258_RS03185	CP258_RS03105	0.902
CP258_RS03030	CP258_RS00760	0.902
CP258_RS05235	CP258_RS05105	0.902
CP258_RS02755	CP258_RS10245	0.902
CP258_RS03480	CP258_RS10295	0.902
CP258_RS02750	CP258_RS03495	0.902
CP258_RS04750	CP258_RS07920	0.902
CP258_RS04440	CP258_RS03830	0.902
CP258_RS03475	CP258_RS01530	0.902
CP258_RS03105	CP258_RS00490	0.902
CP258_RS04970	CP258_RS08970	0.902
CP258_RS02980	CP258_RS09350	0.902
CP258_RS02980	CP258_RS08840	0.902
CP258_RS02750	CP258_RS06790	0.902
CP258_RS03105	CP258_RS04105	0.902
CP258_RS04065	CP258_RS01735	0.902
CP258_RS02985	CP258_RS02890	0.902
CP258_RS04805	CP258_RS07390	0.902
CP258_RS03475	CP258_RS08850	0.902
CP258_RS02980	CP258_RS06705	0.902
CP258_RS02750	CP258_RS07620	0.902
CP258_RS02750	CP258_RS07210	0.902
CP258_RS03350	CP258_RS06915	0.902
CP258_RS02750	CP258_RS04590	0.902
CP258_RS02980	CP258_RS07285	0.902
CP258_RS02750	CP258_RS06795	0.902
CP258_RS03125	CP258_RS04280	0.902
CP258_RS03525	CP258_RS02550	0.902
CP258_RS02750	CP258_RS08675	0.902
CP258_RS03170	CP258_RS01570	0.902
CP258_RS02750	CP258_RS05895	0.902
CP258_RS02750	CP258_RS03610	0.902
CP258_RS03265	CP258_RS01700	0.902
CP258_RS02980	CP258_RS10060	0.902
CP258_RS05405	CP258_RS01975	0.902
CP258_RS04140	CP258_RS09305	0.902
CP258_RS03855	CP258_RS04190	0.902
CP258_RS03910	CP258_RS01170	0.902
CP258_RS03680	CP258_RS10555	0.902
CP258_RS04580	CP258_RS01765	0.902
CP258_RS03095	CP258_RS04705	0.902
CP258_RS02985	CP258_RS04420	0.902
CP258_RS03095	CP258_RS10230	0.902
CP258_RS04755	CP258_RS05515	0.902
CP258_RS02985	CP258_RS07320	0.902
CP258_RS04790	CP258_RS07710	0.902
CP258_RS02980	CP258_RS05185	0.902
CP258_RS03480	CP258_RS04720	0.902
CP258_RS04190	CP258_RS08290	0.902
CP258_RS02750	CP258_RS05760	0.902
CP258_RS02980	CP258_RS05455	0.902
CP258_RS03135	CP258_RS03200	0.902
CP258_RS02985	CP258_RS01770	0.902
CP258_RS02750	CP258_RS07540	0.902
CP258_RS05045	CP258_RS03205	0.901
CP258_RS02980	CP258_RS07280	0.901
CP258_RS03480	CP258_RS01635	0.901
CP258_RS04190	CP258_RS04460	0.901
CP258_RS02750	CP258_RS08115	0.901
CP258_RS02750	CP258_RS04205	0.901
CP258_RS03835	CP258_RS01235	0.901
CP258_RS02750	CP258_RS04380	0.901
CP258_RS04200	CP258_RS07740	0.901
CP258_RS02845	CP258_RS02980	0.901
CP258_RS02975	CP258_RS06285	0.901
CP258_RS04190	CP258_RS09975	0.901
CP258_RS03445	CP258_RS06200	0.901
CP258_RS03445	CP258_RS06150	0.901
CP258_RS02980	CP258_RS07790	0.901
CP258_RS02780	CP258_RS07625	0.901
CP258_RS02750	CP258_RS05205	0.901
CP258_RS02750	CP258_RS04390	0.901
CP258_RS02750	CP258_RS08395	0.901
CP258_RS03445	CP258_RS03850	0.901
CP258_RS02835	CP258_RS05285	0.901
CP258_RS03065	CP258_RS07390	0.901
CP258_RS02780	CP258_RS06415	0.901
CP258_RS02835	CP258_RS03835	0.901
CP258_RS02835	CP258_RS03455	0.901
CP258_RS03350	CP258_RS08065	0.901
CP258_RS02750	CP258_RS08965	0.901
CP258_RS02750	CP258_RS08580	0.901
CP258_RS05105	CP258_RS04120	0.901
CP258_RS02980	CP258_RS06220	0.901
CP258_RS03175	CP258_RS02550	0.901
CP258_RS03000	CP258_RS07830	0.901
CP258_RS03505	CP258_RS07830	0.901
CP258_RS03750	CP258_RS10685	0.901
CP258_RS02980	CP258_RS06085	0.901
CP258_RS02980	CP258_RS03570	0.901
CP258_RS04850	CP258_RS07960	0.901
CP258_RS03835	CP258_RS06375	0.901
CP258_RS02980	CP258_RS05760	0.901
CP258_RS03930	CP258_RS07545	0.901
CP258_RS05085	CP258_RS02980	0.901
CP258_RS00910	CP258_RS00260	0.901
CP258_RS02985	CP258_RS02245	0.901
CP258_RS03780	CP258_RS08125	0.901
CP258_RS02985	CP258_RS02310	0.901
CP258_RS02760	CP258_RS08690	0.901
CP258_RS02985	CP258_RS02330	0.901
CP258_RS03145	CP258_RS03190	0.901
CP258_RS03145	CP258_RS08200	0.901
CP258_RS02750	CP258_RS10530	0.901
CP258_RS03910	CP258_RS01700	0.901
CP258_RS02995	CP258_RS00285	0.901
CP258_RS03445	CP258_RS10270	0.901
CP258_RS05310	CP258_RS00540	0.901
CP258_RS03105	CP258_RS03850	0.901
CP258_RS05330	CP258_RS03205	0.901
CP258_RS02810	CP258_RS02685	0.901
CP258_RS00075	CP258_RS06480	0.901
CP258_RS05160	CP258_RS03585	0.901
CP258_RS03570	CP258_RS10560	0.901
CP258_RS05105	CP258_RS00440	0.901
CP258_RS02980	CP258_RS03445	0.901
CP258_RS03445	CP258_RS09430	0.901
CP258_RS03240	CP258_RS08665	0.901
CP258_RS05355	CP258_RS02550	0.901
CP258_RS02985	CP258_RS06195	0.901
CP258_RS04750	CP258_RS09815	0.9
CP258_RS02750	CP258_RS04060	0.9
CP258_RS04895	CP258_RS06295	0.9
CP258_RS02980	CP258_RS08395	0.9
CP258_RS03595	CP258_RS07710	0.9
CP258_RS03835	CP258_RS10275	0.9
CP258_RS03840	CP258_RS03830	0.9
CP258_RS03345	CP258_RS04560	0.9
CP258_RS04040	CP258_RS00275	0.9
CP258_RS01340	CP258_RS04280	0.9
CP258_RS03835	CP258_RS08285	0.9
CP258_RS02985	CP258_RS01420	0.9
CP258_RS02750	CP258_RS02765	0.9
CP258_RS04895	CP258_RS07530	0.9
CP258_RS05225	CP258_RS10505	0.9
CP258_RS04760	CP258_RS01760	0.9
CP258_RS03745	CP258_RS09455	0.9
CP258_RS02750	CP258_RS04525	0.9
CP258_RS05175	CP258_RS10385	0.9
CP258_RS04760	CP258_RS01010	0.9
CP258_RS03905	CP258_RS10410	0.9
CP258_RS02980	CP258_RS06805	0.9
CP258_RS05235	CP258_RS01805	0.9
CP258_RS02750	CP258_RS08015	0.9
CP258_RS04300	CP258_RS08810	0.9
CP258_RS03575	CP258_RS01890	0.9
CP258_RS02750	CP258_RS08670	0.9
CP258_RS03095	CP258_RS09725	0.9
CP258_RS05225	CP258_RS08155	0.9
CP258_RS02750	CP258_RS09115	0.9
CP258_RS03350	CP258_RS07610	0.9
CP258_RS03540	CP258_RS10345	0.9
CP258_RS00075	CP258_RS06935	0.9
CP258_RS04865	CP258_RS01735	0.9
CP258_RS02780	CP258_RS02055	0.9
CP258_RS03445	CP258_RS09115	0.9
CP258_RS03410	CP258_RS10600	0.9
CP258_RS03335	CP258_RS07505	0.9
CP258_RS03325	CP258_RS00965	0.9
CP258_RS03335	CP258_RS08885	0.9
CP258_RS02980	CP258_RS05635	0.9
CP258_RS02915	CP258_RS01010	0.9
CP258_RS02980	CP258_RS05450	0.9
CP258_RS02980	CP258_RS05240	0.9
CP258_RS02760	CP258_RS03765	0.9
CP258_RS02905	CP258_RS08645	0.9
CP258_RS02980	CP258_RS04965	0.9
CP258_RS03270	CP258_RS02605	0.9
CP258_RS03145	CP258_RS02555	0.9
CP258_RS02980	CP258_RS04545	0.9
CP258_RS05250	CP258_RS08810	0.9
CP258_RS02980	CP258_RS02330	0.9
CP258_RS03100	CP258_RS01890	0.9
CP258_RS02980	CP258_RS02565	0.9
CP258_RS03905	CP258_RS08900	0.9
CP258_RS02750	CP258_RS07320	0.9
CP258_RS02750	CP258_RS06820	0.9
CP258_RS02780	CP258_RS06915	0.9
CP258_RS02750	CP258_RS07330	0.9
CP258_RS02750	CP258_RS06965	0.9
CP258_RS03480	CP258_RS00450	0.9
CP258_RS02750	CP258_RS07515	0.9
CP258_RS02980	CP258_RS02620	0.9
CP258_RS02980	CP258_RS02200	0.9
CP258_RS03480	CP258_RS07735	0.899
CP258_RS03835	CP258_RS06465	0.899
CP258_RS03475	CP258_RS05485	0.899
CP258_RS03585	CP258_RS01890	0.899
CP258_RS05175	CP258_RS09360	0.899
CP258_RS05160	CP258_RS10310	0.899
CP258_RS03105	CP258_RS00435	0.899
CP258_RS03070	CP258_RS02555	0.899
CP258_RS03170	CP258_RS08900	0.899
CP258_RS03500	CP258_RS03205	0.899
CP258_RS05330	CP258_RS01735	0.899
CP258_RS03215	CP258_RS02985	0.899
CP258_RS04190	CP258_RS09300	0.899
CP258_RS05310	CP258_RS02080	0.899
CP258_RS03510	CP258_RS01575	0.899
CP258_RS05160	CP258_RS02970	0.899
CP258_RS04435	CP258_RS00445	0.899
CP258_RS03460	CP258_RS01025	0.899
CP258_RS05225	CP258_RS07230	0.899
CP258_RS05235	CP258_RS03170	0.899
CP258_RS04190	CP258_RS06195	0.899
CP258_RS04280	CP258_RS02800	0.899
CP258_RS04130	CP258_RS07050	0.899
CP258_RS02980	CP258_RS00090	0.899
CP258_RS04120	CP258_RS10685	0.899
CP258_RS03335	CP258_RS06200	0.899
CP258_RS00460	CP258_RS06105	0.899
CP258_RS03335	CP258_RS09495	0.899
CP258_RS04975	CP258_RS00255	0.899
CP258_RS04280	CP258_RS01340	0.899
CP258_RS03445	CP258_RS05790	0.899
CP258_RS03510	CP258_RS10305	0.899
CP258_RS03460	CP258_RS10785	0.899
CP258_RS02835	CP258_RS05515	0.899
CP258_RS02835	CP258_RS10455	0.899
CP258_RS02805	CP258_RS00980	0.899
CP258_RS03290	CP258_RS08665	0.899
CP258_RS02750	CP258_RS06500	0.899
CP258_RS02750	CP258_RS05790	0.899
CP258_RS05165	CP258_RS08805	0.899
CP258_RS02980	CP258_RS07590	0.899
CP258_RS03445	CP258_RS07505	0.899
CP258_RS03195	CP258_RS08975	0.899
CP258_RS00460	CP258_RS04930	0.899
CP258_RS02750	CP258_RS10290	0.899
CP258_RS02980	CP258_RS08010	0.899
CP258_RS02980	CP258_RS04330	0.899
CP258_RS04755	CP258_RS08215	0.899
CP258_RS02750	CP258_RS05415	0.899
CP258_RS02750	CP258_RS05955	0.899
CP258_RS04850	CP258_RS06905	0.899
CP258_RS02750	CP258_RS03580	0.899
CP258_RS02980	CP258_RS05595	0.899
CP258_RS02750	CP258_RS03335	0.899
CP258_RS03335	CP258_RS10270	0.899
CP258_RS02750	CP258_RS06805	0.899
CP258_RS02980	CP258_RS06215	0.899
CP258_RS02985	CP258_RS01445	0.899
CP258_RS02750	CP258_RS07750	0.899
CP258_RS02750	CP258_RS04535	0.899
CP258_RS02980	CP258_RS08965	0.899
CP258_RS03200	CP258_RS01595	0.899
CP258_RS02750	CP258_RS09430	0.899
CP258_RS02780	CP258_RS10150	0.899
CP258_RS03450	CP258_RS01250	0.899
CP258_RS02980	CP258_RS06445	0.899
CP258_RS03200	CP258_RS00950	0.899
CP258_RS03205	CP258_RS04780	0.899
CP258_RS02985	CP258_RS01365	0.899
CP258_RS00460	CP258_RS01305	0.899
CP258_RS02980	CP258_RS01130	0.899
CP258_RS02980	CP258_RS05090	0.899
CP258_RS03445	CP258_RS06905	0.898
CP258_RS02750	CP258_RS05765	0.898
CP258_RS03345	CP258_RS06835	0.898
CP258_RS03405	CP258_RS02555	0.898
CP258_RS02980	CP258_RS03245	0.898
CP258_RS02980	CP258_RS05590	0.898
CP258_RS02750	CP258_RS05195	0.898
CP258_RS03205	CP258_RS05375	0.898
CP258_RS03130	CP258_RS01735	0.898
CP258_RS02750	CP258_RS06875	0.898
CP258_RS02780	CP258_RS06255	0.898
CP258_RS03905	CP258_RS08155	0.898
CP258_RS03905	CP258_RS07230	0.898
CP258_RS03890	CP258_RS02370	0.898
CP258_RS04800	CP258_RS07230	0.898
CP258_RS03830	CP258_RS01820	0.898
CP258_RS02980	CP258_RS02895	0.898
CP258_RS05170	CP258_RS01900	0.898
CP258_RS04270	CP258_RS03255	0.898
CP258_RS05230	CP258_RS03205	0.898
CP258_RS03335	CP258_RS06075	0.898
CP258_RS02980	CP258_RS07620	0.898
CP258_RS00460	CP258_RS02165	0.898
CP258_RS02835	CP258_RS04135	0.898
CP258_RS03480	CP258_RS01850	0.898
CP258_RS02980	CP258_RS05845	0.898
CP258_RS02780	CP258_RS08635	0.898
CP258_RS03445	CP258_RS10335	0.898
CP258_RS02980	CP258_RS03365	0.898
CP258_RS00275	CP258_RS06550	0.898
CP258_RS02980	CP258_RS09090	0.898
CP258_RS03265	CP258_RS10260	0.898
CP258_RS02975	CP258_RS07390	0.898
CP258_RS03640	CP258_RS08975	0.898
CP258_RS05155	CP258_RS01345	0.898
CP258_RS02985	CP258_RS00435	0.898
CP258_RS05180	CP258_RS07960	0.898
CP258_RS00460	CP258_RS05895	0.898
CP258_RS02985	CP258_RS01130	0.898
CP258_RS04970	CP258_RS09360	0.898
CP258_RS03265	CP258_RS02350	0.898
CP258_RS02750	CP258_RS02875	0.898
CP258_RS02985	CP258_RS01785	0.898
CP258_RS05035	CP258_RS00460	0.898
CP258_RS03205	CP258_RS00550	0.898
CP258_RS05235	CP258_RS10670	0.898
CP258_RS02980	CP258_RS06090	0.898
CP258_RS03455	CP258_RS08625	0.898
CP258_RS03335	CP258_RS09935	0.898
CP258_RS03445	CP258_RS04405	0.898
CP258_RS04970	CP258_RS10375	0.898
CP258_RS02980	CP258_RS04920	0.898
CP258_RS04755	CP258_RS02810	0.898
CP258_RS02750	CP258_RS03450	0.898
CP258_RS03330	CP258_RS07260	0.898
CP258_RS03405	CP258_RS04625	0.898
CP258_RS02980	CP258_RS09810	0.898
CP258_RS04175	CP258_RS10245	0.898
CP258_RS05160	CP258_RS10440	0.898
CP258_RS02750	CP258_RS03825	0.898
CP258_RS02750	CP258_RS09850	0.898
CP258_RS03260	CP258_RS09875	0.898
CP258_RS00925	CP258_RS05725	0.898
CP258_RS04135	CP258_RS00830	0.898
CP258_RS02755	CP258_RS10160	0.898
CP258_RS04715	CP258_RS05585	0.898
CP258_RS04125	CP258_RS03200	0.898
CP258_RS03445	CP258_RS05280	0.897
CP258_RS04850	CP258_RS10560	0.897
CP258_RS03905	CP258_RS07935	0.897
CP258_RS02750	CP258_RS09045	0.897
CP258_RS03265	CP258_RS03595	0.897
CP258_RS04295	CP258_RS01010	0.897
CP258_RS03690	CP258_RS10230	0.897
CP258_RS02750	CP258_RS07900	0.897
CP258_RS04970	CP258_RS09955	0.897
CP258_RS02955	CP258_RS07230	0.897
CP258_RS04725	CP258_RS07050	0.897
CP258_RS03510	CP258_RS03480	0.897
CP258_RS02750	CP258_RS10125	0.897
CP258_RS03805	CP258_RS00540	0.897
CP258_RS02750	CP258_RS10420	0.897
CP258_RS03480	CP258_RS03045	0.897
CP258_RS05100	CP258_RS07550	0.897
CP258_RS02980	CP258_RS07490	0.897
CP258_RS03295	CP258_RS03105	0.897
CP258_RS03200	CP258_RS01590	0.897
CP258_RS03615	CP258_RS08125	0.897
CP258_RS00275	CP258_RS00035	0.897
CP258_RS03835	CP258_RS02835	0.897
CP258_RS02980	CP258_RS01400	0.897
CP258_RS02980	CP258_RS10185	0.897
CP258_RS00860	CP258_RS07545	0.897
CP258_RS02975	CP258_RS10505	0.897
CP258_RS03780	CP258_RS07480	0.897
CP258_RS02810	CP258_RS06180	0.897
CP258_RS02750	CP258_RS02840	0.897
CP258_RS00460	CP258_RS06640	0.897
CP258_RS03335	CP258_RS05280	0.897
CP258_RS02980	CP258_RS10680	0.897
CP258_RS03645	CP258_RS00965	0.897
CP258_RS03375	CP258_RS06995	0.897
CP258_RS05105	CP258_RS03835	0.897
CP258_RS02985	CP258_RS01135	0.897
CP258_RS02980	CP258_RS04490	0.897
CP258_RS03195	CP258_RS08900	0.897
CP258_RS05180	CP258_RS10560	0.897
CP258_RS03335	CP258_RS08105	0.897
CP258_RS03770	CP258_RS07675	0.897
CP258_RS02755	CP258_RS01900	0.897
CP258_RS04190	CP258_RS06440	0.897
CP258_RS03345	CP258_RS05930	0.897
CP258_RS02780	CP258_RS05880	0.897
CP258_RS02780	CP258_RS06615	0.897
CP258_RS02780	CP258_RS06625	0.897
CP258_RS05165	CP258_RS06905	0.897
CP258_RS02750	CP258_RS07080	0.897
CP258_RS03445	CP258_RS05795	0.897
CP258_RS03830	CP258_RS04440	0.897
CP258_RS02980	CP258_RS04510	0.897
CP258_RS02905	CP258_RS09340	0.897
CP258_RS02750	CP258_RS06515	0.897
CP258_RS00925	CP258_RS04460	0.897
CP258_RS02750	CP258_RS05980	0.897
CP258_RS02980	CP258_RS06045	0.897
CP258_RS00460	CP258_RS08965	0.897
CP258_RS03205	CP258_RS10720	0.897
CP258_RS03775	CP258_RS02985	0.897
CP258_RS03335	CP258_RS05795	0.897
CP258_RS03425	CP258_RS01735	0.896
CP258_RS03110	CP258_RS02710	0.896
CP258_RS02980	CP258_RS05220	0.896
CP258_RS05160	CP258_RS08925	0.896
CP258_RS02980	CP258_RS04930	0.896
CP258_RS03375	CP258_RS05680	0.896
CP258_RS03480	CP258_RS07965	0.896
CP258_RS02985	CP258_RS02765	0.896
CP258_RS02980	CP258_RS03560	0.896
CP258_RS05235	CP258_RS03405	0.896
CP258_RS03745	CP258_RS04685	0.896
CP258_RS03375	CP258_RS06275	0.896
CP258_RS03375	CP258_RS06450	0.896
CP258_RS03375	CP258_RS09450	0.896
CP258_RS03005	CP258_RS02780	0.896
CP258_RS03750	CP258_RS05170	0.896
CP258_RS03375	CP258_RS06780	0.896
CP258_RS02990	CP258_RS07405	0.896
CP258_RS05160	CP258_RS05705	0.896
CP258_RS03375	CP258_RS08955	0.896
CP258_RS03645	CP258_RS07480	0.896
CP258_RS02985	CP258_RS00490	0.896
CP258_RS02985	CP258_RS01155	0.896
CP258_RS02980	CP258_RS01105	0.896
CP258_RS03670	CP258_RS01890	0.896
CP258_RS03375	CP258_RS07205	0.896
CP258_RS05170	CP258_RS01120	0.896
CP258_RS03595	CP258_RS08470	0.896
CP258_RS03445	CP258_RS08105	0.896
CP258_RS03180	CP258_RS04295	0.896
CP258_RS02945	CP258_RS09170	0.896
CP258_RS03750	CP258_RS10160	0.896
CP258_RS03515	CP258_RS02710	0.896
CP258_RS02980	CP258_RS06500	0.896
CP258_RS03445	CP258_RS04980	0.896
CP258_RS03445	CP258_RS09495	0.896
CP258_RS03445	CP258_RS10665	0.896
CP258_RS03375	CP258_RS05340	0.896
CP258_RS02980	CP258_RS02020	0.896
CP258_RS03750	CP258_RS07920	0.896
CP258_RS02980	CP258_RS02500	0.896
CP258_RS03105	CP258_RS01285	0.896
CP258_RS03580	CP258_RS04190	0.896
CP258_RS03090	CP258_RS02985	0.896
CP258_RS03090	CP258_RS00925	0.896
CP258_RS02980	CP258_RS02030	0.896
CP258_RS03205	CP258_RS04960	0.896
CP258_RS02945	CP258_RS03655	0.896
CP258_RS05310	CP258_RS03205	0.896
CP258_RS02750	CP258_RS04110	0.896
CP258_RS03830	CP258_RS04270	0.896
CP258_RS03945	CP258_RS01735	0.896
CP258_RS03375	CP258_RS04320	0.896
CP258_RS00460	CP258_RS04110	0.896
CP258_RS02760	CP258_RS01750	0.896
CP258_RS02750	CP258_RS03695	0.896
CP258_RS03335	CP258_RS04405	0.896
CP258_RS02750	CP258_RS03875	0.896
CP258_RS05315	CP258_RS07675	0.896
CP258_RS02755	CP258_RS10590	0.896
CP258_RS04435	CP258_RS08140	0.896
CP258_RS02750	CP258_RS04810	0.896
CP258_RS03795	CP258_RS10505	0.896
CP258_RS05135	CP258_RS10380	0.896
CP258_RS05075	CP258_RS09880	0.896
CP258_RS04750	CP258_RS04895	0.896
CP258_RS02750	CP258_RS08400	0.896
CP258_RS03905	CP258_RS08255	0.896
CP258_RS02750	CP258_RS06725	0.896
CP258_RS03910	CP258_RS00660	0.896
CP258_RS03375	CP258_RS03690	0.896
CP258_RS04585	CP258_RS08825	0.896
CP258_RS02775	CP258_RS10155	0.896
CP258_RS02780	CP258_RS08265	0.896
CP258_RS02835	CP258_RS01380	0.896
CP258_RS04190	CP258_RS08630	0.896
CP258_RS02780	CP258_RS00380	0.896
CP258_RS02810	CP258_RS04800	0.896
CP258_RS03350	CP258_RS07625	0.896
CP258_RS03835	CP258_RS08785	0.896
CP258_RS03375	CP258_RS04245	0.896
CP258_RS00275	CP258_RS00345	0.896
CP258_RS02980	CP258_RS06025	0.895
CP258_RS02980	CP258_RS05730	0.895
CP258_RS03085	CP258_RS04280	0.895
CP258_RS03205	CP258_RS01145	0.895
CP258_RS02980	CP258_RS01085	0.895
CP258_RS04195	CP258_RS03990	0.895
CP258_RS02755	CP258_RS00300	0.895
CP258_RS03105	CP258_RS01480	0.895
CP258_RS03375	CP258_RS05330	0.895
CP258_RS02750	CP258_RS07310	0.895
CP258_RS03330	CP258_RS02795	0.895
CP258_RS03910	CP258_RS00045	0.895
CP258_RS02980	CP258_RS07805	0.895
CP258_RS04190	CP258_RS10620	0.895
CP258_RS03350	CP258_RS00060	0.895
CP258_RS02980	CP258_RS02265	0.895
CP258_RS05105	CP258_RS07225	0.895
CP258_RS05165	CP258_RS07960	0.895
CP258_RS05165	CP258_RS10560	0.895
CP258_RS02975	CP258_RS04625	0.895
CP258_RS02980	CP258_RS04045	0.895
CP258_RS03335	CP258_RS10335	0.895
CP258_RS02760	CP258_RS09835	0.895
CP258_RS03375	CP258_RS05510	0.895
CP258_RS03830	CP258_RS03840	0.895
CP258_RS00460	CP258_RS03335	0.895
CP258_RS03260	CP258_RS07845	0.895
CP258_RS03445	CP258_RS09935	0.895
CP258_RS04280	CP258_RS02295	0.895
CP258_RS03375	CP258_RS09615	0.895
CP258_RS02980	CP258_RS02875	0.895
CP258_RS02980	CP258_RS05040	0.895
CP258_RS03375	CP258_RS05755	0.895
CP258_RS04895	CP258_RS07230	0.895
CP258_RS03455	CP258_RS09065	0.895
CP258_RS03890	CP258_RS00455	0.895
CP258_RS02760	CP258_RS01875	0.895
CP258_RS02760	CP258_RS01830	0.895
CP258_RS02835	CP258_RS08215	0.895
CP258_RS03600	CP258_RS03205	0.895
CP258_RS02750	CP258_RS06130	0.895
CP258_RS05180	CP258_RS00925	0.895
CP258_RS02750	CP258_RS06025	0.895
CP258_RS02980	CP258_RS08915	0.895
CP258_RS04190	CP258_RS06720	0.895
CP258_RS05405	CP258_RS03080	0.895
CP258_RS03910	CP258_RS08655	0.895
CP258_RS02980	CP258_RS09800	0.895
CP258_RS02750	CP258_RS03730	0.895
CP258_RS02980	CP258_RS10125	0.895
CP258_RS03375	CP258_RS06770	0.895
CP258_RS02750	CP258_RS03090	0.895
CP258_RS02980	CP258_RS08400	0.895
CP258_RS03145	CP258_RS08235	0.895
CP258_RS02750	CP258_RS01800	0.895
CP258_RS01390	CP258_RS00590	0.895
CP258_RS04535	CP258_RS03105	0.895
CP258_RS03795	CP258_RS01760	0.895
CP258_RS03480	CP258_RS09070	0.895
CP258_RS03480	CP258_RS09620	0.895
CP258_RS03655	CP258_RS02900	0.895
CP258_RS03410	CP258_RS06140	0.895
CP258_RS04325	CP258_RS01735	0.895
CP258_RS04190	CP258_RS04795	0.895
CP258_RS03375	CP258_RS08890	0.895
CP258_RS00075	CP258_RS00175	0.895
CP258_RS03445	CP258_RS04680	0.895
CP258_RS03350	CP258_RS07350	0.895
CP258_RS04120	CP258_RS09815	0.895
CP258_RS03540	CP258_RS09305	0.895
CP258_RS03570	CP258_RS00925	0.895
CP258_RS03800	CP258_RS00030	0.895
CP258_RS03375	CP258_RS06840	0.895
CP258_RS02750	CP258_RS07315	0.895
CP258_RS03215	CP258_RS06905	0.895
CP258_RS02750	CP258_RS05165	0.895
CP258_RS03480	CP258_RS03000	0.895
CP258_RS02980	CP258_RS08580	0.895
CP258_RS02750	CP258_RS05535	0.895
CP258_RS03375	CP258_RS05015	0.895
CP258_RS02750	CP258_RS05085	0.895
CP258_RS03335	CP258_RS06150	0.894
CP258_RS05035	CP258_RS02550	0.894
CP258_RS02775	CP258_RS07050	0.894
CP258_RS03495	CP258_RS06905	0.894
CP258_RS02780	CP258_RS06540	0.894
CP258_RS03495	CP258_RS07550	0.894
CP258_RS03910	CP258_RS03595	0.894
CP258_RS04960	CP258_RS03205	0.894
CP258_RS02750	CP258_RS07145	0.894
CP258_RS04485	CP258_RS02980	0.894
CP258_RS04090	CP258_RS06480	0.894
CP258_RS02780	CP258_RS04685	0.894
CP258_RS01060	CP258_RS00540	0.894
CP258_RS05160	CP258_RS03280	0.894
CP258_RS03375	CP258_RS06030	0.894
CP258_RS05065	CP258_RS02710	0.894
CP258_RS05285	CP258_RS08855	0.894
CP258_RS02975	CP258_RS10515	0.894
CP258_RS04710	CP258_RS04435	0.894
CP258_RS03905	CP258_RS10455	0.894
CP258_RS03335	CP258_RS09115	0.894
CP258_RS01025	CP258_RS08070	0.894
CP258_RS03745	CP258_RS04595	0.894
CP258_RS00325	CP258_RS04160	0.894
CP258_RS00985	CP258_RS09470	0.894
CP258_RS03375	CP258_RS09100	0.894
CP258_RS05330	CP258_RS00540	0.894
CP258_RS03340	CP258_RS02420	0.894
CP258_RS03445	CP258_RS07210	0.894
CP258_RS03550	CP258_RS06905	0.894
CP258_RS00455	CP258_RS04950	0.894
CP258_RS00460	CP258_RS08395	0.894
CP258_RS02985	CP258_RS02660	0.894
CP258_RS02980	CP258_RS09785	0.894
CP258_RS04970	CP258_RS05235	0.894
CP258_RS02980	CP258_RS06575	0.894
CP258_RS03170	CP258_RS00930	0.894
CP258_RS00460	CP258_RS05920	0.894
CP258_RS04750	CP258_RS07220	0.894
CP258_RS00460	CP258_RS06025	0.894
CP258_RS02750	CP258_RS10330	0.894
CP258_RS02755	CP258_RS01895	0.894
CP258_RS03455	CP258_RS10245	0.894
CP258_RS05080	CP258_RS08805	0.894
CP258_RS00460	CP258_RS08580	0.894
CP258_RS02980	CP258_RS05895	0.894
CP258_RS02750	CP258_RS10625	0.894
CP258_RS04190	CP258_RS07345	0.894
CP258_RS04190	CP258_RS05840	0.894
CP258_RS02980	CP258_RS06745	0.894
CP258_RS04750	CP258_RS06180	0.894
CP258_RS03455	CP258_RS08855	0.894
CP258_RS03455	CP258_RS08285	0.894
CP258_RS02980	CP258_RS06940	0.894
CP258_RS03455	CP258_RS08025	0.894
CP258_RS03375	CP258_RS06955	0.894
CP258_RS03335	CP258_RS10065	0.894
CP258_RS02750	CP258_RS00435	0.894
CP258_RS03335	CP258_RS07760	0.894
CP258_RS02980	CP258_RS04680	0.894
CP258_RS03335	CP258_RS04680	0.894
CP258_RS03335	CP258_RS04205	0.894
CP258_RS02980	CP258_RS07210	0.894
CP258_RS03335	CP258_RS09430	0.894
CP258_RS04530	CP258_RS02490	0.894
CP258_RS03345	CP258_RS07290	0.894
CP258_RS03375	CP258_RS07770	0.894
CP258_RS04895	CP258_RS08970	0.894
CP258_RS03375	CP258_RS05010	0.894
CP258_RS03805	CP258_RS10305	0.894
CP258_RS03800	CP258_RS01640	0.894
CP258_RS03090	CP258_RS02550	0.894
CP258_RS03235	CP258_RS09550	0.894
CP258_RS04190	CP258_RS10725	0.894
CP258_RS03800	CP258_RS02850	0.894
CP258_RS02870	CP258_RS10230	0.894
CP258_RS03800	CP258_RS00505	0.894
CP258_RS04895	CP258_RS05170	0.894
CP258_RS03460	CP258_RS02555	0.893
CP258_RS02990	CP258_RS03145	0.893
CP258_RS05225	CP258_RS10540	0.893
CP258_RS02755	CP258_RS07470	0.893
CP258_RS02835	CP258_RS01390	0.893
CP258_RS03525	CP258_RS00715	0.893
CP258_RS03835	CP258_RS03220	0.893
CP258_RS03375	CP258_RS09050	0.893
CP258_RS02750	CP258_RS06460	0.893
CP258_RS03375	CP258_RS03985	0.893
CP258_RS02980	CP258_RS01720	0.893
CP258_RS03800	CP258_RS00805	0.893
CP258_RS02750	CP258_RS06105	0.893
CP258_RS02980	CP258_RS01615	0.893
CP258_RS03375	CP258_RS09580	0.893
CP258_RS05160	CP258_RS10050	0.893
CP258_RS05405	CP258_RS10040	0.893
CP258_RS03040	CP258_RS10560	0.893
CP258_RS02980	CP258_RS10415	0.893
[truncated: 7,377 more rows]

## Sheet: CP-1002_network
Gene1	Gene2	Value
Cp1002B_RS03355	Cp1002B_RS01805	0.939
Cp1002B_RS02880	Cp1002B_RS00465	0.938
Cp1002B_RS03980	Cp1002B_RS04495	0.936
Cp1002B_RS03445	Cp1002B_RS10720	0.935
Cp1002B_RS03455	Cp1002B_RS02020	0.933
Cp1002B_RS03710	Cp1002B_RS10225	0.931
Cp1002B_RS03925	Cp1002B_RS10230	0.93
Cp1002B_RS02880	Cp1002B_RS02970	0.929
Cp1002B_RS03620	Cp1002B_RS04855	0.929
Cp1002B_RS03080	Cp1002B_RS00610	0.929
Cp1002B_RS05300	Cp1002B_RS00670	0.928
Cp1002B_RS02920	Cp1002B_RS09565	0.926
Cp1002B_RS02920	Cp1002B_RS01685	0.926
Cp1002B_RS03455	Cp1002B_RS01575	0.925
Cp1002B_RS03720	Cp1002B_RS01800	0.925
Cp1002B_RS02920	Cp1002B_RS03655	0.924
Cp1002B_RS02920	Cp1002B_RS01345	0.924
Cp1002B_RS02880	Cp1002B_RS08570	0.924
Cp1002B_RS02745	Cp1002B_RS10265	0.924
Cp1002B_RS02920	Cp1002B_RS01085	0.923
Cp1002B_RS02920	Cp1002B_RS06815	0.921
Cp1002B_RS02825	Cp1002B_RS08355	0.92
Cp1002B_RS02920	Cp1002B_RS08060	0.92
Cp1002B_RS02920	Cp1002B_RS03250	0.919
Cp1002B_RS03455	Cp1002B_RS00690	0.918
Cp1002B_RS03455	Cp1002B_RS01785	0.918
Cp1002B_RS02920	Cp1002B_RS08545	0.918
Cp1002B_RS03675	Cp1002B_RS01480	0.917
Cp1002B_RS03660	Cp1002B_RS00610	0.917
Cp1002B_RS02875	Cp1002B_RS00770	0.915
Cp1002B_RS02920	Cp1002B_RS03595	0.915
Cp1002B_RS02745	Cp1002B_RS05775	0.915
Cp1002B_RS02920	Cp1002B_RS02065	0.915
Cp1002B_RS01050	Cp1002B_RS00885	0.914
Cp1002B_RS03455	Cp1002B_RS02545	0.914
Cp1002B_RS05230	Cp1002B_RS08870	0.913
Cp1002B_RS02880	Cp1002B_RS06720	0.913
Cp1002B_RS03660	Cp1002B_RS01805	0.912
Cp1002B_RS03590	Cp1002B_RS01655	0.912
Cp1002B_RS03455	Cp1002B_RS05345	0.912
Cp1002B_RS03625	Cp1002B_RS02515	0.912
Cp1002B_RS02920	Cp1002B_RS00870	0.912
Cp1002B_RS03590	Cp1002B_RS02645	0.912
Cp1002B_RS05220	Cp1002B_RS10720	0.912
Cp1002B_RS03675	Cp1002B_RS02920	0.912
Cp1002B_RS03590	Cp1002B_RS00170	0.911
Cp1002B_RS03425	Cp1002B_RS01810	0.911
Cp1002B_RS02975	Cp1002B_RS01805	0.911
Cp1002B_RS04230	Cp1002B_RS09775	0.911
Cp1002B_RS02880	Cp1002B_RS02580	0.91
Cp1002B_RS03590	Cp1002B_RS01875	0.91
Cp1002B_RS02975	Cp1002B_RS00730	0.91
Cp1002B_RS03695	Cp1002B_RS01810	0.909
Cp1002B_RS03590	Cp1002B_RS00840	0.909
Cp1002B_RS02880	Cp1002B_RS08955	0.909
Cp1002B_RS03590	Cp1002B_RS02705	0.909
Cp1002B_RS02945	Cp1002B_RS01480	0.909
Cp1002B_RS02745	Cp1002B_RS08945	0.908
Cp1002B_RS03400	Cp1002B_RS01810	0.908
Cp1002B_RS03590	Cp1002B_RS01705	0.908
Cp1002B_RS03950	Cp1002B_RS00670	0.907
Cp1002B_RS03405	Cp1002B_RS01875	0.907
Cp1002B_RS02920	Cp1002B_RS01710	0.907
Cp1002B_RS02880	Cp1002B_RS00820	0.907
Cp1002B_RS03445	Cp1002B_RS04495	0.907
Cp1002B_RS02920	Cp1002B_RS03255	0.907
Cp1002B_RS04615	Cp1002B_RS01050	0.907
Cp1002B_RS03405	Cp1002B_RS02630	0.907
Cp1002B_RS03405	Cp1002B_RS02705	0.906
Cp1002B_RS03790	Cp1002B_RS01800	0.906
Cp1002B_RS03590	Cp1002B_RS01185	0.906
Cp1002B_RS03840	Cp1002B_RS02920	0.906
Cp1002B_RS04760	Cp1002B_RS09930	0.906
Cp1002B_RS03980	Cp1002B_RS10700	0.906
Cp1002B_RS03070	Cp1002B_RS09905	0.906
Cp1002B_RS02920	Cp1002B_RS02060	0.906
Cp1002B_RS03710	Cp1002B_RS10335	0.906
Cp1002B_RS01050	Cp1002B_RS00205	0.906
Cp1002B_RS03980	Cp1002B_RS05755	0.906
Cp1002B_RS02835	Cp1002B_RS01110	0.906
Cp1002B_RS03405	Cp1002B_RS02645	0.905
Cp1002B_RS02710	Cp1002B_RS09640	0.905
Cp1002B_RS03455	Cp1002B_RS01540	0.905
Cp1002B_RS02920	Cp1002B_RS04440	0.905
Cp1002B_RS03505	Cp1002B_RS02515	0.905
Cp1002B_RS03570	Cp1002B_RS10805	0.905
Cp1002B_RS02880	Cp1002B_RS05690	0.905
Cp1002B_RS03570	Cp1002B_RS09595	0.904
Cp1002B_RS03405	Cp1002B_RS03205	0.904
Cp1002B_RS03555	Cp1002B_RS01480	0.904
Cp1002B_RS03590	Cp1002B_RS02070	0.904
Cp1002B_RS03570	Cp1002B_RS07370	0.904
Cp1002B_RS04880	Cp1002B_RS10670	0.903
Cp1002B_RS03570	Cp1002B_RS06840	0.903
Cp1002B_RS03405	Cp1002B_RS01705	0.903
Cp1002B_RS04495	Cp1002B_RS09700	0.903
Cp1002B_RS02705	Cp1002B_RS00170	0.903
Cp1002B_RS02705	Cp1002B_RS01875	0.903
Cp1002B_RS03405	Cp1002B_RS01200	0.903
Cp1002B_RS03590	Cp1002B_RS00585	0.903
Cp1002B_RS03455	Cp1002B_RS09840	0.903
Cp1002B_RS03070	Cp1002B_RS10495	0.903
Cp1002B_RS03050	Cp1002B_RS10160	0.903
Cp1002B_RS03590	Cp1002B_RS02755	0.903
Cp1002B_RS02920	Cp1002B_RS02765	0.903
Cp1002B_RS03070	Cp1002B_RS03510	0.903
Cp1002B_RS03590	Cp1002B_RS03560	0.903
Cp1002B_RS02885	Cp1002B_RS00125	0.903
Cp1002B_RS02915	Cp1002B_RS01800	0.903
Cp1002B_RS03050	Cp1002B_RS10100	0.903
Cp1002B_RS02830	Cp1002B_RS02320	0.902
Cp1002B_RS03070	Cp1002B_RS05300	0.902
Cp1002B_RS02705	Cp1002B_RS01655	0.902
Cp1002B_RS02705	Cp1002B_RS00295	0.902
Cp1002B_RS02880	Cp1002B_RS04405	0.902
Cp1002B_RS02880	Cp1002B_RS04360	0.902
Cp1002B_RS03590	Cp1002B_RS00445	0.902
Cp1002B_RS03570	Cp1002B_RS07350	0.902
Cp1002B_RS03405	Cp1002B_RS00895	0.902
Cp1002B_RS02705	Cp1002B_RS01210	0.902
Cp1002B_RS03405	Cp1002B_RS02035	0.901
Cp1002B_RS03570	Cp1002B_RS06030	0.901
Cp1002B_RS02920	Cp1002B_RS03420	0.901
Cp1002B_RS03570	Cp1002B_RS04715	0.901
Cp1002B_RS04615	Cp1002B_RS00730	0.901
Cp1002B_RS03590	Cp1002B_RS00270	0.901
Cp1002B_RS02830	Cp1002B_RS07710	0.901
Cp1002B_RS03590	Cp1002B_RS03405	0.901
Cp1002B_RS03405	Cp1002B_RS02650	0.901
Cp1002B_RS01170	Cp1002B_RS01050	0.901
Cp1002B_RS02920	Cp1002B_RS01065	0.901
Cp1002B_RS03570	Cp1002B_RS09980	0.901
Cp1002B_RS03445	Cp1002B_RS04475	0.901
Cp1002B_RS00105	Cp1002B_RS00770	0.901
Cp1002B_RS03405	Cp1002B_RS00840	0.901
Cp1002B_RS03510	Cp1002B_RS03070	0.9
Cp1002B_RS03505	Cp1002B_RS08850	0.9
Cp1002B_RS03405	Cp1002B_RS02045	0.9
Cp1002B_RS03405	Cp1002B_RS02070	0.9
Cp1002B_RS02920	Cp1002B_RS00990	0.9
Cp1002B_RS02920	Cp1002B_RS01145	0.9
Cp1002B_RS03505	Cp1002B_RS04760	0.9
Cp1002B_RS03455	Cp1002B_RS05010	0.9
Cp1002B_RS02705	Cp1002B_RS01705	0.9
Cp1002B_RS02775	Cp1002B_RS04495	0.9
Cp1002B_RS05300	Cp1002B_RS01050	0.9
Cp1002B_RS02920	Cp1002B_RS09265	0.9
Cp1002B_RS03570	Cp1002B_RS10465	0.9
Cp1002B_RS03405	Cp1002B_RS02985	0.9
Cp1002B_RS03590	Cp1002B_RS01920	0.9
Cp1002B_RS03590	Cp1002B_RS03205	0.9
Cp1002B_RS03570	Cp1002B_RS06690	0.899
Cp1002B_RS03590	Cp1002B_RS01200	0.899
Cp1002B_RS03455	Cp1002B_RS08490	0.899
Cp1002B_RS04495	Cp1002B_RS04630	0.899
Cp1002B_RS02710	Cp1002B_RS02865	0.899
Cp1002B_RS02705	Cp1002B_RS01920	0.899
Cp1002B_RS04495	Cp1002B_RS09380	0.899
Cp1002B_RS03505	Cp1002B_RS04880	0.899
Cp1002B_RS02885	Cp1002B_RS01720	0.899
Cp1002B_RS02705	Cp1002B_RS01200	0.899
Cp1002B_RS02705	Cp1002B_RS01185	0.899
Cp1002B_RS02920	Cp1002B_RS05030	0.899
Cp1002B_RS03920	Cp1002B_RS01480	0.899
Cp1002B_RS03715	Cp1002B_RS04700	0.899
Cp1002B_RS04230	Cp1002B_RS02820	0.898
Cp1002B_RS03590	Cp1002B_RS01925	0.898
Cp1002B_RS03570	Cp1002B_RS04485	0.898
Cp1002B_RS02705	Cp1002B_RS00270	0.898
Cp1002B_RS03590	Cp1002B_RS01425	0.898
Cp1002B_RS02920	Cp1002B_RS01940	0.898
Cp1002B_RS02920	Cp1002B_RS03840	0.898
Cp1002B_RS03590	Cp1002B_RS02555	0.898
Cp1002B_RS03570	Cp1002B_RS10820	0.898
Cp1002B_RS02800	Cp1002B_RS00770	0.898
Cp1002B_RS02920	Cp1002B_RS02600	0.898
Cp1002B_RS03455	Cp1002B_RS03475	0.898
Cp1002B_RS03070	Cp1002B_RS10100	0.898
Cp1002B_RS03405	Cp1002B_RS02295	0.897
Cp1002B_RS02705	Cp1002B_RS02035	0.897
Cp1002B_RS03570	Cp1002B_RS09215	0.897
Cp1002B_RS03570	Cp1002B_RS05570	0.897
Cp1002B_RS03920	Cp1002B_RS02920	0.897
Cp1002B_RS03485	Cp1002B_RS08215	0.897
Cp1002B_RS02745	Cp1002B_RS03710	0.897
Cp1002B_RS03570	Cp1002B_RS06010	0.897
Cp1002B_RS03940	Cp1002B_RS08075	0.897
Cp1002B_RS02920	Cp1002B_RS07115	0.897
Cp1002B_RS03590	Cp1002B_RS02650	0.897
Cp1002B_RS04230	Cp1002B_RS02325	0.897
Cp1002B_RS02920	Cp1002B_RS00365	0.897
Cp1002B_RS02920	Cp1002B_RS01160	0.897
Cp1002B_RS03050	Cp1002B_RS03070	0.897
Cp1002B_RS04495	Cp1002B_RS08845	0.897
Cp1002B_RS02825	Cp1002B_RS04880	0.897
Cp1002B_RS03405	Cp1002B_RS01405	0.896
Cp1002B_RS02705	Cp1002B_RS02650	0.896
Cp1002B_RS02705	Cp1002B_RS00895	0.896
Cp1002B_RS02920	Cp1002B_RS07585	0.896
Cp1002B_RS03405	Cp1002B_RS02180	0.896
Cp1002B_RS02920	Cp1002B_RS07725	0.896
Cp1002B_RS03050	Cp1002B_RS09905	0.896
Cp1002B_RS03205	Cp1002B_RS07890	0.896
Cp1002B_RS03205	Cp1002B_RS07640	0.896
Cp1002B_RS05360	Cp1002B_RS01810	0.896
Cp1002B_RS02880	Cp1002B_RS01260	0.896
Cp1002B_RS03405	Cp1002B_RS01655	0.896
Cp1002B_RS03590	Cp1002B_RS02180	0.896
Cp1002B_RS03590	Cp1002B_RS02095	0.896
Cp1002B_RS03590	Cp1002B_RS02045	0.896
Cp1002B_RS03405	Cp1002B_RS01320	0.896
Cp1002B_RS03455	Cp1002B_RS01900	0.896
Cp1002B_RS03405	Cp1002B_RS01210	0.896
Cp1002B_RS04230	Cp1002B_RS00930	0.896
Cp1002B_RS03570	Cp1002B_RS05255	0.895
Cp1002B_RS03540	Cp1002B_RS04480	0.895
Cp1002B_RS03660	Cp1002B_RS04475	0.895
Cp1002B_RS00060	Cp1002B_RS06280	0.895
Cp1002B_RS04495	Cp1002B_RS09855	0.895
Cp1002B_RS03405	Cp1002B_RS02110	0.895
Cp1002B_RS03605	Cp1002B_RS01210	0.895
Cp1002B_RS03605	Cp1002B_RS01875	0.895
Cp1002B_RS03570	Cp1002B_RS07555	0.895
Cp1002B_RS03950	Cp1002B_RS10720	0.895
Cp1002B_RS02705	Cp1002B_RS00840	0.895
Cp1002B_RS02705	Cp1002B_RS02045	0.895
Cp1002B_RS02705	Cp1002B_RS02105	0.895
Cp1002B_RS03605	Cp1002B_RS02705	0.895
Cp1002B_RS03590	Cp1002B_RS00895	0.895
Cp1002B_RS03605	Cp1002B_RS00170	0.895
Cp1002B_RS03820	Cp1002B_RS01650	0.895
Cp1002B_RS05230	Cp1002B_RS03925	0.895
Cp1002B_RS03205	Cp1002B_RS04460	0.895
Cp1002B_RS03605	Cp1002B_RS02630	0.895
Cp1002B_RS02920	Cp1002B_RS08915	0.895
Cp1002B_RS03405	Cp1002B_RS00445	0.895
Cp1002B_RS01485	Cp1002B_RS01050	0.895
Cp1002B_RS03405	Cp1002B_RS00295	0.895
Cp1002B_RS02920	Cp1002B_RS03630	0.894
Cp1002B_RS03590	Cp1002B_RS01390	0.894
Cp1002B_RS02920	Cp1002B_RS10735	0.894
Cp1002B_RS03605	Cp1002B_RS00295	0.894
Cp1002B_RS03605	Cp1002B_RS02925	0.894
Cp1002B_RS03045	Cp1002B_RS03965	0.894
Cp1002B_RS03405	Cp1002B_RS01185	0.894
Cp1002B_RS03050	Cp1002B_RS10495	0.894
Cp1002B_RS01050	Cp1002B_RS00475	0.894
Cp1002B_RS03570	Cp1002B_RS07095	0.894
Cp1002B_RS03570	Cp1002B_RS09800	0.894
Cp1002B_RS03590	Cp1002B_RS02985	0.894
Cp1002B_RS03205	Cp1002B_RS08280	0.894
Cp1002B_RS03405	Cp1002B_RS02925	0.894
Cp1002B_RS03205	Cp1002B_RS06135	0.894
Cp1002B_RS02760	Cp1002B_RS01480	0.894
Cp1002B_RS03570	Cp1002B_RS07140	0.894
Cp1002B_RS02705	Cp1002B_RS02070	0.894
Cp1002B_RS03605	Cp1002B_RS01920	0.893
Cp1002B_RS03405	Cp1002B_RS01905	0.893
Cp1002B_RS03590	Cp1002B_RS02295	0.893
Cp1002B_RS03605	Cp1002B_RS02645	0.893
Cp1002B_RS04880	Cp1002B_RS04835	0.893
Cp1002B_RS02920	Cp1002B_RS04770	0.893
Cp1002B_RS03475	Cp1002B_RS03455	0.893
Cp1002B_RS03605	Cp1002B_RS01200	0.893
Cp1002B_RS04725	Cp1002B_RS01805	0.893
Cp1002B_RS03605	Cp1002B_RS01185	0.893
Cp1002B_RS02745	Cp1002B_RS05235	0.893
Cp1002B_RS02880	Cp1002B_RS02820	0.893
Cp1002B_RS02710	Cp1002B_RS02245	0.893
Cp1002B_RS03570	Cp1002B_RS08665	0.893
Cp1002B_RS03605	Cp1002B_RS01655	0.893
Cp1002B_RS02920	Cp1002B_RS01845	0.893
Cp1002B_RS03570	Cp1002B_RS05155	0.893
Cp1002B_RS03570	Cp1002B_RS06400	0.893
Cp1002B_RS03570	Cp1002B_RS07805	0.893
Cp1002B_RS03405	Cp1002B_RS01920	0.893
Cp1002B_RS03590	Cp1002B_RS03235	0.893
Cp1002B_RS03605	Cp1002B_RS01705	0.893
Cp1002B_RS04495	Cp1002B_RS04785	0.893
Cp1002B_RS02920	Cp1002B_RS02510	0.893
Cp1002B_RS03590	Cp1002B_RS02740	0.893
Cp1002B_RS03590	Cp1002B_RS02105	0.893
Cp1002B_RS03590	Cp1002B_RS03450	0.893
Cp1002B_RS03570	Cp1002B_RS06015	0.892
Cp1002B_RS03395	Cp1002B_RS05810	0.892
Cp1002B_RS02920	Cp1002B_RS06010	0.892
Cp1002B_RS04495	Cp1002B_RS06120	0.892
Cp1002B_RS03590	Cp1002B_RS03350	0.892
Cp1002B_RS03205	Cp1002B_RS08255	0.892
Cp1002B_RS03570	Cp1002B_RS08140	0.892
Cp1002B_RS02920	Cp1002B_RS07945	0.892
Cp1002B_RS03205	Cp1002B_RS09580	0.892
Cp1002B_RS02920	Cp1002B_RS06425	0.892
Cp1002B_RS03570	Cp1002B_RS08010	0.892
Cp1002B_RS03735	Cp1002B_RS01805	0.892
Cp1002B_RS04230	Cp1002B_RS02090	0.892
Cp1002B_RS05300	Cp1002B_RS03070	0.892
Cp1002B_RS02920	Cp1002B_RS00575	0.892
Cp1002B_RS03605	Cp1002B_RS00270	0.892
Cp1002B_RS03605	Cp1002B_RS03090	0.892
Cp1002B_RS02920	Cp1002B_RS00435	0.892
Cp1002B_RS02705	Cp1002B_RS01405	0.892
Cp1002B_RS03590	Cp1002B_RS01625	0.892
Cp1002B_RS02920	Cp1002B_RS09215	0.892
Cp1002B_RS03275	Cp1002B_RS04080	0.891
Cp1002B_RS03790	Cp1002B_RS01640	0.891
Cp1002B_RS03205	Cp1002B_RS06045	0.891
Cp1002B_RS03205	Cp1002B_RS06035	0.891
Cp1002B_RS03405	Cp1002B_RS01425	0.891
Cp1002B_RS02760	Cp1002B_RS09595	0.891
Cp1002B_RS03205	Cp1002B_RS08770	0.891
Cp1002B_RS03590	Cp1002B_RS00975	0.891
Cp1002B_RS02920	Cp1002B_RS09740	0.891
Cp1002B_RS03405	Cp1002B_RS02695	0.891
Cp1002B_RS03570	Cp1002B_RS05260	0.891
Cp1002B_RS03570	Cp1002B_RS07510	0.891
Cp1002B_RS03905	Cp1002B_RS02880	0.891
Cp1002B_RS03605	Cp1002B_RS02650	0.891
Cp1002B_RS02920	Cp1002B_RS09800	0.891
Cp1002B_RS03710	Cp1002B_RS02745	0.891
Cp1002B_RS03205	Cp1002B_RS08130	0.891
Cp1002B_RS03205	Cp1002B_RS04895	0.891
Cp1002B_RS03570	Cp1002B_RS06460	0.891
Cp1002B_RS03205	Cp1002B_RS04415	0.891
Cp1002B_RS03205	Cp1002B_RS09555	0.891
Cp1002B_RS05300	Cp1002B_RS00610	0.891
Cp1002B_RS03205	Cp1002B_RS08165	0.891
Cp1002B_RS03390	Cp1002B_RS04880	0.891
Cp1002B_RS03275	Cp1002B_RS10805	0.891
Cp1002B_RS03570	Cp1002B_RS06340	0.891
Cp1002B_RS03205	Cp1002B_RS06130	0.891
Cp1002B_RS02705	Cp1002B_RS02295	0.891
Cp1002B_RS03390	Cp1002B_RS04760	0.891
Cp1002B_RS03405	Cp1002B_RS00935	0.891
Cp1002B_RS03510	Cp1002B_RS10495	0.891
Cp1002B_RS03275	Cp1002B_RS07370	0.891
Cp1002B_RS03205	Cp1002B_RS05280	0.891
Cp1002B_RS03990	Cp1002B_RS05755	0.89
Cp1002B_RS03205	Cp1002B_RS03650	0.89
Cp1002B_RS03605	Cp1002B_RS03405	0.89
Cp1002B_RS02920	Cp1002B_RS02760	0.89
Cp1002B_RS03405	Cp1002B_RS01520	0.89
Cp1002B_RS04230	Cp1002B_RS00660	0.89
Cp1002B_RS02920	Cp1002B_RS07630	0.89
Cp1002B_RS03275	Cp1002B_RS04300	0.89
Cp1002B_RS03980	Cp1002B_RS04475	0.89
Cp1002B_RS02920	Cp1002B_RS08195	0.89
Cp1002B_RS03275	Cp1002B_RS09980	0.89
Cp1002B_RS03485	Cp1002B_RS00005	0.89
Cp1002B_RS03605	Cp1002B_RS02045	0.89
Cp1002B_RS03275	Cp1002B_RS08155	0.89
Cp1002B_RS03840	Cp1002B_RS01480	0.89
Cp1002B_RS03275	Cp1002B_RS08245	0.89
Cp1002B_RS03455	Cp1002B_RS00715	0.89
Cp1002B_RS03205	Cp1002B_RS08150	0.89
Cp1002B_RS03205	Cp1002B_RS09405	0.89
Cp1002B_RS02875	Cp1002B_RS05600	0.89
Cp1002B_RS03540	Cp1002B_RS08460	0.89
Cp1002B_RS03205	Cp1002B_RS05805	0.89
Cp1002B_RS04495	Cp1002B_RS09910	0.89
Cp1002B_RS03275	Cp1002B_RS06840	0.89
Cp1002B_RS03275	Cp1002B_RS09370	0.889
Cp1002B_RS03275	Cp1002B_RS08120	0.889
Cp1002B_RS03455	Cp1002B_RS02215	0.889
Cp1002B_RS03275	Cp1002B_RS10465	0.889
Cp1002B_RS02920	Cp1002B_RS06240	0.889
Cp1002B_RS03605	Cp1002B_RS02070	0.889
Cp1002B_RS03395	Cp1002B_RS10055	0.889
Cp1002B_RS03205	Cp1002B_RS09935	0.889
Cp1002B_RS03205	Cp1002B_RS09660	0.889
Cp1002B_RS02705	Cp1002B_RS02180	0.889
Cp1002B_RS02920	Cp1002B_RS00755	0.889
Cp1002B_RS02705	Cp1002B_RS01415	0.889
Cp1002B_RS02835	Cp1002B_RS08870	0.889
Cp1002B_RS03570	Cp1002B_RS09545	0.889
Cp1002B_RS02920	Cp1002B_RS03555	0.889
Cp1002B_RS03205	Cp1002B_RS04695	0.889
Cp1002B_RS02705	Cp1002B_RS00445	0.889
Cp1002B_RS03485	Cp1002B_RS02760	0.889
Cp1002B_RS03485	Cp1002B_RS03145	0.889
Cp1002B_RS03605	Cp1002B_RS02105	0.889
Cp1002B_RS02920	Cp1002B_RS04050	0.889
Cp1002B_RS03205	Cp1002B_RS07325	0.889
Cp1002B_RS03205	Cp1002B_RS05395	0.889
Cp1002B_RS02920	Cp1002B_RS07980	0.889
Cp1002B_RS03570	Cp1002B_RS04220	0.889
Cp1002B_RS03915	Cp1002B_RS05280	0.888
Cp1002B_RS03205	Cp1002B_RS08035	0.888
Cp1002B_RS02705	Cp1002B_RS02110	0.888
Cp1002B_RS03405	Cp1002B_RS01420	0.888
Cp1002B_RS02920	Cp1002B_RS09980	0.888
Cp1002B_RS03275	Cp1002B_RS08615	0.888
Cp1002B_RS03590	Cp1002B_RS01330	0.888
Cp1002B_RS03915	Cp1002B_RS04415	0.888
Cp1002B_RS03205	Cp1002B_RS08395	0.888
Cp1002B_RS02920	Cp1002B_RS08080	0.888
Cp1002B_RS03275	Cp1002B_RS04505	0.888
Cp1002B_RS03915	Cp1002B_RS06045	0.888
Cp1002B_RS03205	Cp1002B_RS08750	0.888
Cp1002B_RS03570	Cp1002B_RS07155	0.888
Cp1002B_RS03205	Cp1002B_RS09510	0.888
Cp1002B_RS03590	Cp1002B_RS01405	0.888
Cp1002B_RS03275	Cp1002B_RS07565	0.888
Cp1002B_RS01170	Cp1002B_RS00670	0.888
Cp1002B_RS02705	Cp1002B_RS02555	0.888
Cp1002B_RS02885	Cp1002B_RS10710	0.888
Cp1002B_RS03590	Cp1002B_RS03470	0.888
Cp1002B_RS03590	Cp1002B_RS02695	0.888
Cp1002B_RS03710	Cp1002B_RS02835	0.888
Cp1002B_RS02920	Cp1002B_RS03570	0.888
Cp1002B_RS02760	Cp1002B_RS08215	0.888
Cp1002B_RS03650	Cp1002B_RS02630	0.888
Cp1002B_RS04230	Cp1002B_RS00880	0.888
Cp1002B_RS03590	Cp1002B_RS03325	0.888
Cp1002B_RS03590	Cp1002B_RS02630	0.888
Cp1002B_RS03605	Cp1002B_RS02035	0.888
Cp1002B_RS03650	Cp1002B_RS01875	0.888
Cp1002B_RS02975	Cp1002B_RS00610	0.888
Cp1002B_RS03485	Cp1002B_RS00755	0.888
Cp1002B_RS03205	Cp1002B_RS06070	0.888
Cp1002B_RS03625	Cp1002B_RS01050	0.888
Cp1002B_RS03405	Cp1002B_RS02105	0.888
Cp1002B_RS03050	Cp1002B_RS04285	0.887
Cp1002B_RS03915	Cp1002B_RS07820	0.887
Cp1002B_RS03915	Cp1002B_RS07890	0.887
Cp1002B_RS03205	Cp1002B_RS05265	0.887
Cp1002B_RS03605	Cp1002B_RS02295	0.887
Cp1002B_RS03205	Cp1002B_RS09270	0.887
Cp1002B_RS03915	Cp1002B_RS08165	0.887
Cp1002B_RS03590	Cp1002B_RS02130	0.887
Cp1002B_RS03205	Cp1002B_RS08765	0.887
Cp1002B_RS03420	Cp1002B_RS01480	0.887
Cp1002B_RS05230	Cp1002B_RS04565	0.887
Cp1002B_RS03915	Cp1002B_RS06130	0.887
Cp1002B_RS03590	Cp1002B_RS01210	0.887
Cp1002B_RS03205	Cp1002B_RS05035	0.887
Cp1002B_RS03485	Cp1002B_RS00750	0.887
Cp1002B_RS02920	Cp1002B_RS08155	0.887
Cp1002B_RS02710	Cp1002B_RS04070	0.887
Cp1002B_RS03650	Cp1002B_RS01655	0.887
Cp1002B_RS02920	Cp1002B_RS01680	0.887
Cp1002B_RS03405	Cp1002B_RS01625	0.887
Cp1002B_RS03650	Cp1002B_RS01920	0.887
Cp1002B_RS05300	Cp1002B_RS03510	0.887
Cp1002B_RS03650	Cp1002B_RS00170	0.887
Cp1002B_RS03915	Cp1002B_RS09555	0.887
Cp1002B_RS02705	Cp1002B_RS00585	0.887
Cp1002B_RS03055	Cp1002B_RS07025	0.887
Cp1002B_RS03405	Cp1002B_RS01330	0.887
Cp1002B_RS02920	Cp1002B_RS03410	0.887
Cp1002B_RS03405	Cp1002B_RS02560	0.887
Cp1002B_RS03605	Cp1002B_RS01405	0.887
Cp1002B_RS02705	Cp1002B_RS00935	0.887
Cp1002B_RS03915	Cp1002B_RS06035	0.887
Cp1002B_RS03205	Cp1002B_RS06985	0.887
Cp1002B_RS03275	Cp1002B_RS08080	0.887
Cp1002B_RS03275	Cp1002B_RS07365	0.887
Cp1002B_RS03205	Cp1002B_RS08300	0.887
Cp1002B_RS04230	Cp1002B_RS02930	0.887
Cp1002B_RS03915	Cp1002B_RS04895	0.887
Cp1002B_RS03205	Cp1002B_RS06640	0.887
Cp1002B_RS02945	Cp1002B_RS01545	0.887
Cp1002B_RS01720	Cp1002B_RS00070	0.887
Cp1002B_RS03275	Cp1002B_RS09595	0.887
Cp1002B_RS03990	Cp1002B_RS10700	0.887
Cp1002B_RS03590	Cp1002B_RS02035	0.887
Cp1002B_RS03915	Cp1002B_RS04100	0.887
Cp1002B_RS03275	Cp1002B_RS10820	0.887
Cp1002B_RS03590	Cp1002B_RS01320	0.887
Cp1002B_RS03820	Cp1002B_RS10700	0.887
Cp1002B_RS03915	Cp1002B_RS04460	0.887
Cp1002B_RS04230	Cp1002B_RS04445	0.887
Cp1002B_RS03205	Cp1002B_RS06570	0.887
Cp1002B_RS02755	Cp1002B_RS01200	0.886
Cp1002B_RS03915	Cp1002B_RS08770	0.886
Cp1002B_RS03650	Cp1002B_RS01200	0.886
Cp1002B_RS04475	Cp1002B_RS05010	0.886
Cp1002B_RS03915	Cp1002B_RS09935	0.886
Cp1002B_RS04925	Cp1002B_RS00730	0.886
Cp1002B_RS03275	Cp1002B_RS04715	0.886
Cp1002B_RS03915	Cp1002B_RS08280	0.886
Cp1002B_RS04475	Cp1002B_RS02415	0.886
Cp1002B_RS03405	Cp1002B_RS01415	0.886
Cp1002B_RS03570	Cp1002B_RS06620	0.886
Cp1002B_RS03650	Cp1002B_RS03205	0.886
Cp1002B_RS02710	Cp1002B_RS01530	0.886
Cp1002B_RS03395	Cp1002B_RS04075	0.886
Cp1002B_RS03205	Cp1002B_RS07280	0.886
Cp1002B_RS03570	Cp1002B_RS09065	0.886
Cp1002B_RS03650	Cp1002B_RS01210	0.886
Cp1002B_RS03605	Cp1002B_RS01320	0.886
Cp1002B_RS03205	Cp1002B_RS07750	0.886
Cp1002B_RS02920	Cp1002B_RS00750	0.886
Cp1002B_RS03915	Cp1002B_RS09405	0.886
Cp1002B_RS02830	Cp1002B_RS08610	0.886
Cp1002B_RS03205	Cp1002B_RS06645	0.886
Cp1002B_RS04430	Cp1002B_RS00670	0.886
Cp1002B_RS02705	Cp1002B_RS01520	0.886
Cp1002B_RS03570	Cp1002B_RS09450	0.886
Cp1002B_RS02945	Cp1002B_RS00750	0.886
Cp1002B_RS04230	Cp1002B_RS10135	0.886
Cp1002B_RS03650	Cp1002B_RS02925	0.886
Cp1002B_RS03590	Cp1002B_RS01285	0.886
Cp1002B_RS03405	Cp1002B_RS02400	0.886
Cp1002B_RS03275	Cp1002B_RS04775	0.886
Cp1002B_RS03275	Cp1002B_RS07350	0.886
Cp1002B_RS03605	Cp1002B_RS02180	0.886
Cp1002B_RS03205	Cp1002B_RS08930	0.886
Cp1002B_RS03275	Cp1002B_RS06010	0.886
Cp1002B_RS02920	Cp1002B_RS05080	0.886
Cp1002B_RS03605	Cp1002B_RS03590	0.886
Cp1002B_RS03770	Cp1002B_RS01875	0.886
Cp1002B_RS03540	Cp1002B_RS08015	0.886
Cp1002B_RS03275	Cp1002B_RS07095	0.886
Cp1002B_RS03915	Cp1002B_RS05375	0.886
Cp1002B_RS03205	Cp1002B_RS05630	0.886
Cp1002B_RS03205	Cp1002B_RS08900	0.886
Cp1002B_RS03205	Cp1002B_RS05270	0.886
Cp1002B_RS03915	Cp1002B_RS10405	0.886
Cp1002B_RS03915	Cp1002B_RS05805	0.886
Cp1002B_RS03770	Cp1002B_RS02630	0.886
Cp1002B_RS03570	Cp1002B_RS05515	0.886
Cp1002B_RS03570	Cp1002B_RS04045	0.886
Cp1002B_RS03505	Cp1002B_RS00670	0.886
Cp1002B_RS03820	Cp1002B_RS05755	0.886
Cp1002B_RS03405	Cp1002B_RS02555	0.886
Cp1002B_RS00205	Cp1002B_RS01050	0.885
Cp1002B_RS03205	Cp1002B_RS06040	0.885
Cp1002B_RS03905	Cp1002B_RS04470	0.885
Cp1002B_RS03205	Cp1002B_RS06100	0.885
Cp1002B_RS03915	Cp1002B_RS06070	0.885
Cp1002B_RS03205	Cp1002B_RS06085	0.885
Cp1002B_RS03650	Cp1002B_RS00895	0.885
Cp1002B_RS03590	Cp1002B_RS02700	0.885
Cp1002B_RS03915	Cp1002B_RS04015	0.885
Cp1002B_RS02920	Cp1002B_RS07350	0.885
Cp1002B_RS03770	Cp1002B_RS01210	0.885
Cp1002B_RS03590	Cp1002B_RS01015	0.885
Cp1002B_RS03915	Cp1002B_RS07380	0.885
Cp1002B_RS03915	Cp1002B_RS08150	0.885
Cp1002B_RS03205	Cp1002B_RS05060	0.885
Cp1002B_RS04925	Cp1002B_RS01805	0.885
Cp1002B_RS03590	Cp1002B_RS00580	0.885
Cp1002B_RS02920	Cp1002B_RS08120	0.885
Cp1002B_RS03650	Cp1002B_RS00295	0.885
Cp1002B_RS03915	Cp1002B_RS04695	0.885
Cp1002B_RS03915	Cp1002B_RS05035	0.885
Cp1002B_RS03915	Cp1002B_RS07325	0.885
Cp1002B_RS03205	Cp1002B_RS05420	0.885
Cp1002B_RS03770	Cp1002B_RS00170	0.885
Cp1002B_RS03405	Cp1002B_RS02755	0.885
Cp1002B_RS02760	Cp1002B_RS07155	0.885
Cp1002B_RS03915	Cp1002B_RS01655	0.885
Cp1002B_RS03770	Cp1002B_RS02925	0.885
Cp1002B_RS03915	Cp1002B_RS08035	0.885
Cp1002B_RS03650	Cp1002B_RS02985	0.885
Cp1002B_RS03975	Cp1002B_RS01810	0.885
Cp1002B_RS03275	Cp1002B_RS09800	0.885
Cp1002B_RS03275	Cp1002B_RS09215	0.885
Cp1002B_RS03275	Cp1002B_RS08915	0.885
Cp1002B_RS03650	Cp1002B_RS02705	0.885
Cp1002B_RS02705	Cp1002B_RS01425	0.885
Cp1002B_RS03655	Cp1002B_RS02920	0.885
Cp1002B_RS03605	Cp1002B_RS01415	0.885
Cp1002B_RS03650	Cp1002B_RS02645	0.885
Cp1002B_RS04495	Cp1002B_RS08655	0.885
Cp1002B_RS02940	Cp1002B_RS00770	0.885
Cp1002B_RS04880	Cp1002B_RS03390	0.885
Cp1002B_RS04880	Cp1002B_RS01590	0.885
Cp1002B_RS03405	Cp1002B_RS00360	0.885
Cp1002B_RS03275	Cp1002B_RS07140	0.885
Cp1002B_RS02945	Cp1002B_RS03145	0.885
Cp1002B_RS03605	Cp1002B_RS02110	0.885
Cp1002B_RS03605	Cp1002B_RS02555	0.885
Cp1002B_RS03275	Cp1002B_RS06240	0.885
Cp1002B_RS03405	Cp1002B_RS00585	0.885
Cp1002B_RS02945	Cp1002B_RS09595	0.885
Cp1002B_RS03050	Cp1002B_RS06910	0.885
Cp1002B_RS03275	Cp1002B_RS06400	0.885
Cp1002B_RS03915	Cp1002B_RS08395	0.884
Cp1002B_RS04230	Cp1002B_RS03905	0.884
Cp1002B_RS04285	Cp1002B_RS01050	0.884
Cp1002B_RS02945	Cp1002B_RS01380	0.884
Cp1002B_RS03205	Cp1002B_RS06595	0.884
Cp1002B_RS03570	Cp1002B_RS06740	0.884
Cp1002B_RS03770	Cp1002B_RS01655	0.884
Cp1002B_RS03590	Cp1002B_RS02155	0.884
Cp1002B_RS03915	Cp1002B_RS10075	0.884
Cp1002B_RS03205	Cp1002B_RS06345	0.884
Cp1002B_RS03205	Cp1002B_RS06185	0.884
Cp1002B_RS03770	Cp1002B_RS02705	0.884
Cp1002B_RS03205	Cp1002B_RS06750	0.884
Cp1002B_RS03205	Cp1002B_RS07285	0.884
Cp1002B_RS03405	Cp1002B_RS00480	0.884
Cp1002B_RS03675	Cp1002B_RS03145	0.884
Cp1002B_RS03275	Cp1002B_RS06030	0.884
Cp1002B_RS03205	Cp1002B_RS08960	0.884
Cp1002B_RS03275	Cp1002B_RS06015	0.884
Cp1002B_RS03205	Cp1002B_RS09185	0.884
Cp1002B_RS03275	Cp1002B_RS06425	0.884
Cp1002B_RS03570	Cp1002B_RS07970	0.884
Cp1002B_RS03275	Cp1002B_RS06855	0.884
Cp1002B_RS02920	Cp1002B_RS07370	0.884
Cp1002B_RS03915	Cp1002B_RS06985	0.884
Cp1002B_RS03915	Cp1002B_RS06020	0.884
Cp1002B_RS03570	Cp1002B_RS07740	0.884
Cp1002B_RS03605	Cp1002B_RS00445	0.884
Cp1002B_RS04475	Cp1002B_RS03660	0.884
Cp1002B_RS03205	Cp1002B_RS08160	0.884
Cp1002B_RS03570	Cp1002B_RS07375	0.884
Cp1002B_RS02945	Cp1002B_RS00435	0.884
Cp1002B_RS04475	Cp1002B_RS09005	0.884
Cp1002B_RS03405	Cp1002B_RS02130	0.884
Cp1002B_RS03915	Cp1002B_RS07385	0.884
Cp1002B_RS03590	Cp1002B_RS03190	0.884
Cp1002B_RS03675	Cp1002B_RS03275	0.884
Cp1002B_RS03205	Cp1002B_RS05370	0.884
Cp1002B_RS03205	Cp1002B_RS08880	0.884
Cp1002B_RS03590	Cp1002B_RS02480	0.884
Cp1002B_RS03205	Cp1002B_RS04000	0.884
Cp1002B_RS02880	Cp1002B_RS07665	0.884
Cp1002B_RS05300	Cp1002B_RS01670	0.884
Cp1002B_RS03915	Cp1002B_RS09490	0.884
Cp1002B_RS03915	Cp1002B_RS08750	0.884
Cp1002B_RS03915	Cp1002B_RS09270	0.884
Cp1002B_RS04495	Cp1002B_RS06395	0.884
Cp1002B_RS03570	Cp1002B_RS09265	0.884
Cp1002B_RS02945	Cp1002B_RS07350	0.884
Cp1002B_RS03915	Cp1002B_RS09660	0.884
Cp1002B_RS03650	Cp1002B_RS02105	0.884
Cp1002B_RS03205	Cp1002B_RS04955	0.884
Cp1002B_RS03055	Cp1002B_RS04580	0.884
Cp1002B_RS03590	Cp1002B_RS02900	0.884
Cp1002B_RS02920	Cp1002B_RS00680	0.884
Cp1002B_RS02705	Cp1002B_RS02630	0.884
Cp1002B_RS02825	Cp1002B_RS01165	0.884
Cp1002B_RS02920	Cp1002B_RS03200	0.884
Cp1002B_RS03205	Cp1002B_RS09620	0.883
Cp1002B_RS03590	Cp1002B_RS02675	0.883
Cp1002B_RS03395	Cp1002B_RS10815	0.883
Cp1002B_RS02705	Cp1002B_RS01420	0.883
Cp1002B_RS03915	Cp1002B_RS10410	0.883
Cp1002B_RS03205	Cp1002B_RS09780	0.883
Cp1002B_RS03405	Cp1002B_RS00490	0.883
Cp1002B_RS03915	Cp1002B_RS05135	0.883
Cp1002B_RS03590	Cp1002B_RS00705	0.883
Cp1002B_RS02830	Cp1002B_RS00070	0.883
Cp1002B_RS02880	Cp1002B_RS07940	0.883
Cp1002B_RS03205	Cp1002B_RS03915	0.883
Cp1002B_RS02920	Cp1002B_RS00100	0.883
Cp1002B_RS05125	Cp1002B_RS10235	0.883
Cp1002B_RS02945	Cp1002B_RS00005	0.883
Cp1002B_RS03915	Cp1002B_RS06680	0.883
Cp1002B_RS03275	Cp1002B_RS06340	0.883
Cp1002B_RS03915	Cp1002B_RS06570	0.883
Cp1002B_RS02920	Cp1002B_RS07690	0.883
Cp1002B_RS03205	Cp1002B_RS04250	0.883
Cp1002B_RS03770	Cp1002B_RS02645	0.883
Cp1002B_RS03660	Cp1002B_RS03455	0.883
Cp1002B_RS02945	Cp1002B_RS04715	0.883
Cp1002B_RS03770	Cp1002B_RS01920	0.883
Cp1002B_RS05300	Cp1002B_RS02015	0.883
Cp1002B_RS03675	Cp1002B_RS01380	0.883
Cp1002B_RS02945	Cp1002B_RS02685	0.883
Cp1002B_RS03205	Cp1002B_RS04515	0.883
Cp1002B_RS02945	Cp1002B_RS01385	0.883
Cp1002B_RS03915	Cp1002B_RS08765	0.883
Cp1002B_RS03770	Cp1002B_RS01200	0.883
Cp1002B_RS05300	Cp1002B_RS00325	0.883
Cp1002B_RS02920	Cp1002B_RS08345	0.883
Cp1002B_RS03485	Cp1002B_RS01940	0.883
Cp1002B_RS02945	Cp1002B_RS02760	0.883
Cp1002B_RS02755	Cp1002B_RS00895	0.883
Cp1002B_RS03510	Cp1002B_RS10100	0.883
Cp1002B_RS03770	Cp1002B_RS03650	0.883
Cp1002B_RS03510	Cp1002B_RS00670	0.883
Cp1002B_RS03205	Cp1002B_RS05580	0.883
Cp1002B_RS03675	Cp1002B_RS01545	0.883
Cp1002B_RS03205	Cp1002B_RS05040	0.883
Cp1002B_RS03570	Cp1002B_RS04300	0.882
Cp1002B_RS03205	Cp1002B_RS06935	0.882
Cp1002B_RS03205	Cp1002B_RS05970	0.882
Cp1002B_RS03915	Cp1002B_RS06085	0.882
Cp1002B_RS04475	Cp1002B_RS05980	0.882
Cp1002B_RS03590	Cp1002B_RS01325	0.882
Cp1002B_RS02920	Cp1002B_RS00150	0.882
Cp1002B_RS03355	Cp1002B_RS01650	0.882
Cp1002B_RS03590	Cp1002B_RS03135	0.882
Cp1002B_RS03205	Cp1002B_RS03605	0.882
Cp1002B_RS03605	Cp1002B_RS03450	0.882
Cp1002B_RS03915	Cp1002B_RS06185	0.882
Cp1002B_RS02920	Cp1002B_RS05405	0.882
Cp1002B_RS04835	Cp1002B_RS00670	0.882
Cp1002B_RS02945	Cp1002B_RS01280	0.882
Cp1002B_RS05300	Cp1002B_RS03050	0.882
Cp1002B_RS02825	Cp1002B_RS08850	0.882
Cp1002B_RS01640	Cp1002B_RS00140	0.882
Cp1002B_RS03205	Cp1002B_RS06655	0.882
Cp1002B_RS03915	Cp1002B_RS02035	0.882
Cp1002B_RS03570	Cp1002B_RS07115	0.882
Cp1002B_RS03590	Cp1002B_RS01520	0.882
Cp1002B_RS02920	Cp1002B_RS04045	0.882
Cp1002B_RS03455	Cp1002B_RS06295	0.882
Cp1002B_RS02945	Cp1002B_RS06015	0.882
Cp1002B_RS02775	Cp1002B_RS10720	0.882
Cp1002B_RS03205	Cp1002B_RS03405	0.882
Cp1002B_RS02945	Cp1002B_RS07140	0.882
Cp1002B_RS03570	Cp1002B_RS07075	0.882
Cp1002B_RS03570	Cp1002B_RS06955	0.882
Cp1002B_RS03205	Cp1002B_RS08105	0.882
Cp1002B_RS03205	Cp1002B_RS08135	0.882
Cp1002B_RS03605	Cp1002B_RS02695	0.882
Cp1002B_RS03275	Cp1002B_RS07510	0.882
Cp1002B_RS03205	Cp1002B_RS04720	0.882
Cp1002B_RS03570	Cp1002B_RS06465	0.882
Cp1002B_RS04495	Cp1002B_RS05745	0.882
Cp1002B_RS02755	Cp1002B_RS01905	0.882
Cp1002B_RS03590	Cp1002B_RS00590	0.882
Cp1002B_RS02920	Cp1002B_RS10450	0.882
Cp1002B_RS03915	Cp1002B_RS07280	0.882
Cp1002B_RS03605	Cp1002B_RS01425	0.882
Cp1002B_RS03915	Cp1002B_RS08900	0.882
Cp1002B_RS03275	Cp1002B_RS03485	0.882
Cp1002B_RS03405	Cp1002B_RS02740	0.882
Cp1002B_RS03275	Cp1002B_RS04485	0.882
Cp1002B_RS03570	Cp1002B_RS09820	0.882
Cp1002B_RS02755	Cp1002B_RS02705	0.882
Cp1002B_RS04880	Cp1002B_RS01910	0.882
Cp1002B_RS03915	Cp1002B_RS08625	0.882
Cp1002B_RS03605	Cp1002B_RS00585	0.882
Cp1002B_RS02705	Cp1002B_RS02645	0.882
Cp1002B_RS03570	Cp1002B_RS08245	0.882
Cp1002B_RS03570	Cp1002B_RS09210	0.882
Cp1002B_RS03605	Cp1002B_RS00935	0.882
Cp1002B_RS04495	Cp1002B_RS05475	0.882
Cp1002B_RS02755	Cp1002B_RS01875	0.882
Cp1002B_RS03915	Cp1002B_RS06640	0.882
Cp1002B_RS02705	Cp1002B_RS02560	0.882
Cp1002B_RS03220	Cp1002B_RS01810	0.882
Cp1002B_RS03915	Cp1002B_RS04250	0.881
Cp1002B_RS03915	Cp1002B_RS08930	0.881
Cp1002B_RS03590	Cp1002B_RS01860	0.881
Cp1002B_RS03770	Cp1002B_RS01185	0.881
Cp1002B_RS03650	Cp1002B_RS03590	0.881
Cp1002B_RS03590	Cp1002B_RS01375	0.881
Cp1002B_RS02880	Cp1002B_RS04615	0.881
Cp1002B_RS02945	Cp1002B_RS01080	0.881
Cp1002B_RS03770	Cp1002B_RS00270	0.881
Cp1002B_RS03720	Cp1002B_RS02710	0.881
Cp1002B_RS03405	Cp1002B_RS01015	0.881
Cp1002B_RS03915	Cp1002B_RS07800	0.881
Cp1002B_RS03205	Cp1002B_RS07020	0.881
Cp1002B_RS03650	Cp1002B_RS02650	0.881
Cp1002B_RS03205	Cp1002B_RS07490	0.881
Cp1002B_RS03155	Cp1002B_RS06690	0.881
Cp1002B_RS03205	Cp1002B_RS09885	0.881
Cp1002B_RS03915	Cp1002B_RS09185	0.881
Cp1002B_RS04475	Cp1002B_RS05005	0.881
Cp1002B_RS03405	Cp1002B_RS03325	0.881
Cp1002B_RS03590	Cp1002B_RS01905	0.881
Cp1002B_RS03770	Cp1002B_RS01705	0.881
Cp1002B_RS03675	Cp1002B_RS00005	0.881
Cp1002B_RS03405	Cp1002B_RS03195	0.881
Cp1002B_RS03915	Cp1002B_RS08300	0.881
Cp1002B_RS03590	Cp1002B_RS02575	0.881
Cp1002B_RS03675	Cp1002B_RS01680	0.881
Cp1002B_RS03405	Cp1002B_RS01935	0.881
Cp1002B_RS04615	Cp1002B_RS00670	0.881
Cp1002B_RS02755	Cp1002B_RS02045	0.881
Cp1002B_RS03570	Cp1002B_RS08220	0.881
Cp1002B_RS03915	Cp1002B_RS08795	0.881
Cp1002B_RS02920	Cp1002B_RS05045	0.881
Cp1002B_RS03915	Cp1002B_RS09430	0.881
Cp1002B_RS03570	Cp1002B_RS09665	0.881
Cp1002B_RS01165	Cp1002B_RS03530	0.881
Cp1002B_RS03590	Cp1002B_RS00360	0.881
Cp1002B_RS03205	Cp1002B_RS06670	0.881
Cp1002B_RS03205	Cp1002B_RS10865	0.881
Cp1002B_RS03915	Cp1002B_RS08880	0.881
Cp1002B_RS03640	Cp1002B_RS02035	0.881
Cp1002B_RS03405	Cp1002B_RS00160	0.881
Cp1002B_RS03915	Cp1002B_RS05420	0.881
Cp1002B_RS03915	Cp1002B_RS06040	0.881
Cp1002B_RS03590	Cp1002B_RS01135	0.881
Cp1002B_RS00730	Cp1002B_RS00475	0.881
Cp1002B_RS03275	Cp1002B_RS05570	0.881
Cp1002B_RS03650	Cp1002B_RS01705	0.881
Cp1002B_RS03205	Cp1002B_RS09305	0.881
Cp1002B_RS03915	Cp1002B_RS07225	0.881
Cp1002B_RS03915	Cp1002B_RS06645	0.881
Cp1002B_RS03605	Cp1002B_RS01520	0.881
Cp1002B_RS03590	Cp1002B_RS02870	0.881
Cp1002B_RS03205	Cp1002B_RS08780	0.881
Cp1002B_RS03205	Cp1002B_RS07180	0.88
Cp1002B_RS02705	Cp1002B_RS02400	0.88
Cp1002B_RS03275	Cp1002B_RS04050	0.88
Cp1002B_RS03915	Cp1002B_RS09620	0.88
Cp1002B_RS03915	Cp1002B_RS05580	0.88
Cp1002B_RS03915	Cp1002B_RS08470	0.88
Cp1002B_RS03535	Cp1002B_RS08015	0.88
Cp1002B_RS03915	Cp1002B_RS08885	0.88
Cp1002B_RS03770	Cp1002B_RS02985	0.88
Cp1002B_RS03650	Cp1002B_RS02035	0.88
Cp1002B_RS03205	Cp1002B_RS08580	0.88
Cp1002B_RS03770	Cp1002B_RS03090	0.88
Cp1002B_RS04475	Cp1002B_RS09840	0.88
Cp1002B_RS02920	Cp1002B_RS01385	0.88
Cp1002B_RS03915	Cp1002B_RS06100	0.88
Cp1002B_RS03205	Cp1002B_RS04385	0.88
Cp1002B_RS03570	Cp1002B_RS08080	0.88
Cp1002B_RS03915	Cp1002B_RS04720	0.88
Cp1002B_RS02920	Cp1002B_RS08225	0.88
Cp1002B_RS02705	Cp1002B_RS01330	0.88
Cp1002B_RS02765	Cp1002B_RS01480	0.88
Cp1002B_RS03915	Cp1002B_RS06950	0.88
Cp1002B_RS03590	Cp1002B_RS02605	0.88
Cp1002B_RS03205	Cp1002B_RS06325	0.88
Cp1002B_RS03275	Cp1002B_RS06620	0.88
Cp1002B_RS03915	Cp1002B_RS05355	0.88
Cp1002B_RS03650	Cp1002B_RS01405	0.88
Cp1002B_RS03620	Cp1002B_RS10055	0.88
Cp1002B_RS03915	Cp1002B_RS06750	0.88
Cp1002B_RS03590	Cp1002B_RS00625	0.88
Cp1002B_RS03915	Cp1002B_RS07420	0.88
Cp1002B_RS03640	Cp1002B_RS01655	0.88
Cp1002B_RS03915	Cp1002B_RS05040	0.88
Cp1002B_RS03520	Cp1002B_RS00190	0.88
Cp1002B_RS03205	Cp1002B_RS04020	0.88
Cp1002B_RS03205	Cp1002B_RS08820	0.88
Cp1002B_RS02760	Cp1002B_RS07545	0.88
Cp1002B_RS03915	Cp1002B_RS04000	0.88
Cp1002B_RS03405	Cp1002B_RS02700	0.88
Cp1002B_RS03070	Cp1002B_RS04880	0.88
Cp1002B_RS03440	Cp1002B_RS02195	0.88
Cp1002B_RS03650	Cp1002B_RS01320	0.88
Cp1002B_RS02920	Cp1002B_RS07625	0.88
Cp1002B_RS02755	Cp1002B_RS01705	0.88
Cp1002B_RS03915	Cp1002B_RS02645	0.88
Cp1002B_RS02945	Cp1002B_RS00080	0.88
Cp1002B_RS03590	Cp1002B_RS00165	0.88
Cp1002B_RS01640	Cp1002B_RS01245	0.88
Cp1002B_RS03675	Cp1002B_RS00080	0.88
Cp1002B_RS03450	Cp1002B_RS02105	0.88
Cp1002B_RS03050	Cp1002B_RS04615	0.879
Cp1002B_RS03770	Cp1002B_RS00895	0.879
Cp1002B_RS03640	Cp1002B_RS02645	0.879
Cp1002B_RS03915	Cp1002B_RS06595	0.879
Cp1002B_RS02755	Cp1002B_RS02645	0.879
Cp1002B_RS03650	Cp1002B_RS01185	0.879
Cp1002B_RS03485	Cp1002B_RS01880	0.879
Cp1002B_RS03450	Cp1002B_RS00170	0.879
Cp1002B_RS03405	Cp1002B_RS01325	0.879
Cp1002B_RS03770	Cp1002B_RS02045	0.879
Cp1002B_RS03650	Cp1002B_RS00270	0.879
Cp1002B_RS03570	Cp1002B_RS04030	0.879
Cp1002B_RS03570	Cp1002B_RS08155	0.879
Cp1002B_RS04255	Cp1002B_RS01810	0.879
Cp1002B_RS04495	Cp1002B_RS08490	0.879
Cp1002B_RS02755	Cp1002B_RS02400	0.879
Cp1002B_RS04495	Cp1002B_RS10005	0.879
Cp1002B_RS03915	Cp1002B_RS09885	0.879
Cp1002B_RS03915	Cp1002B_RS06670	0.879
Cp1002B_RS03450	Cp1002B_RS02705	0.879
Cp1002B_RS03210	Cp1002B_RS01480	0.879
Cp1002B_RS03390	Cp1002B_RS03505	0.879
Cp1002B_RS03570	Cp1002B_RS05045	0.879
Cp1002B_RS03915	Cp1002B_RS06935	0.879
Cp1002B_RS02880	Cp1002B_RS09295	0.879
Cp1002B_RS03915	Cp1002B_RS08160	0.879
Cp1002B_RS03450	Cp1002B_RS00295	0.879
Cp1002B_RS03205	Cp1002B_RS06920	0.879
Cp1002B_RS03450	Cp1002B_RS02630	0.879
Cp1002B_RS03915	Cp1002B_RS07020	0.879
Cp1002B_RS02705	Cp1002B_RS02095	0.879
Cp1002B_RS04475	Cp1002B_RS05345	0.879
Cp1002B_RS04495	Cp1002B_RS04725	0.879
Cp1002B_RS03450	Cp1002B_RS01875	0.879
Cp1002B_RS03605	Cp1002B_RS01420	0.879
Cp1002B_RS02945	Cp1002B_RS00330	0.879
Cp1002B_RS00770	Cp1002B_RS03460	0.879
Cp1002B_RS03275	Cp1002B_RS09125	0.879
Cp1002B_RS03205	Cp1002B_RS07600	0.879
Cp1002B_RS02920	Cp1002B_RS09595	0.879
Cp1002B_RS03570	Cp1002B_RS09370	0.879
Cp1002B_RS03915	Cp1002B_RS04955	0.879
Cp1002B_RS03405	Cp1002B_RS02575	0.879
Cp1002B_RS03915	Cp1002B_RS07285	0.879
Cp1002B_RS02880	Cp1002B_RS10030	0.879
Cp1002B_RS03570	Cp1002B_RS07365	0.879
Cp1002B_RS02705	Cp1002B_RS01925	0.879
Cp1002B_RS03455	Cp1002B_RS02415	0.879
Cp1002B_RS03205	Cp1002B_RS07145	0.879
Cp1002B_RS03205	Cp1002B_RS06760	0.879
Cp1002B_RS03205	Cp1002B_RS04365	0.879
Cp1002B_RS03405	Cp1002B_RS03235	0.879
Cp1002B_RS02760	Cp1002B_RS00005	0.879
Cp1002B_RS02945	Cp1002B_RS05570	0.879
Cp1002B_RS03915	Cp1002B_RS08135	0.879
Cp1002B_RS00770	Cp1002B_RS06790	0.879
Cp1002B_RS02705	Cp1002B_RS00360	0.879
Cp1002B_RS03915	Cp1002B_RS06610	0.879
Cp1002B_RS03450	Cp1002B_RS01705	0.878
Cp1002B_RS03450	Cp1002B_RS01655	0.878
Cp1002B_RS03205	Cp1002B_RS04550	0.878
Cp1002B_RS03205	Cp1002B_RS04295	0.878
Cp1002B_RS03205	Cp1002B_RS05145	0.878
Cp1002B_RS03025	Cp1002B_RS00050	0.878
Cp1002B_RS03605	Cp1002B_RS02560	0.878
Cp1002B_RS03450	Cp1002B_RS00270	0.878
Cp1002B_RS03070	Cp1002B_RS04615	0.878
Cp1002B_RS03040	Cp1002B_RS10055	0.878
Cp1002B_RS00770	Cp1002B_RS08260	0.878
Cp1002B_RS00770	Cp1002B_RS00500	0.878
Cp1002B_RS03050	Cp1002B_RS07035	0.878
Cp1002B_RS03485	Cp1002B_RS02725	0.878
Cp1002B_RS03450	Cp1002B_RS01185	0.878
Cp1002B_RS03915	Cp1002B_RS08580	0.878
Cp1002B_RS02880	Cp1002B_RS00885	0.878
Cp1002B_RS03650	Cp1002B_RS02045	0.878
Cp1002B_RS02760	Cp1002B_RS09210	0.878
Cp1002B_RS03405	Cp1002B_RS00085	0.878
Cp1002B_RS03450	Cp1002B_RS02925	0.878
Cp1002B_RS03605	Cp1002B_RS03350	0.878
Cp1002B_RS02885	Cp1002B_RS02830	0.878
Cp1002B_RS03650	Cp1002B_RS01905	0.878
Cp1002B_RS03915	Cp1002B_RS08825	0.878
Cp1002B_RS03605	Cp1002B_RS01330	0.878
Cp1002B_RS03405	Cp1002B_RS02095	0.878
Cp1002B_RS05030	Cp1002B_RS01480	0.878
Cp1002B_RS03205	Cp1002B_RS08720	0.878
Cp1002B_RS02755	Cp1002B_RS02295	0.878
Cp1002B_RS04495	Cp1002B_RS10065	0.878
Cp1002B_RS03915	Cp1002B_RS10110	0.878
Cp1002B_RS01110	Cp1002B_RS02745	0.878
Cp1002B_RS02760	Cp1002B_RS01380	0.878
Cp1002B_RS02705	Cp1002B_RS00480	0.878
Cp1002B_RS03205	Cp1002B_RS06635	0.878
Cp1002B_RS03915	Cp1002B_RS08105	0.878
Cp1002B_RS03275	Cp1002B_RS09740	0.878
Cp1002B_RS03050	Cp1002B_RS05550	0.878
Cp1002B_RS03915	Cp1002B_RS07070	0.878
Cp1002B_RS03405	Cp1002B_RS02480	0.878
Cp1002B_RS03275	Cp1002B_RS09450	0.878
Cp1002B_RS03915	Cp1002B_RS07145	0.878
Cp1002B_RS03570	Cp1002B_RS07565	0.878
Cp1002B_RS03545	Cp1002B_RS02285	0.878
Cp1002B_RS03915	Cp1002B_RS01875	0.878
Cp1002B_RS03405	Cp1002B_RS03350	0.878
Cp1002B_RS03455	Cp1002B_RS03660	0.878
Cp1002B_RS03275	Cp1002B_RS07740	0.878
Cp1002B_RS03570	Cp1002B_RS07965	0.878
Cp1002B_RS03275	Cp1002B_RS07970	0.878
Cp1002B_RS03950	Cp1002B_RS04475	0.878
Cp1002B_RS03915	Cp1002B_RS06655	0.878
Cp1002B_RS03915	Cp1002B_RS06245	0.878
Cp1002B_RS03915	Cp1002B_RS06760	0.878
Cp1002B_RS03770	Cp1002B_RS02105	0.878
Cp1002B_RS03210	Cp1002B_RS02920	0.878
Cp1002B_RS03605	Cp1002B_RS01625	0.877
Cp1002B_RS03605	Cp1002B_RS00625	0.877
Cp1002B_RS03555	Cp1002B_RS02920	0.877
Cp1002B_RS03895	Cp1002B_RS01810	0.877
Cp1002B_RS03915	Cp1002B_RS06445	0.877
Cp1002B_RS03275	Cp1002B_RS07075	0.877
Cp1002B_RS03510	Cp1002B_RS00325	0.877
Cp1002B_RS03450	Cp1002B_RS03205	0.877
Cp1002B_RS03915	Cp1002B_RS00170	0.877
Cp1002B_RS03075	Cp1002B_RS03055	0.877
Cp1002B_RS03915	Cp1002B_RS05060	0.877
Cp1002B_RS03915	Cp1002B_RS08820	0.877
Cp1002B_RS03605	Cp1002B_RS02400	0.877
Cp1002B_RS02325	Cp1002B_RS10340	0.877
Cp1002B_RS03450	Cp1002B_RS01920	0.877
Cp1002B_RS03915	Cp1002B_RS04020	0.877
Cp1002B_RS03275	Cp1002B_RS09065	0.877
Cp1002B_RS00175	Cp1002B_RS01805	0.877
Cp1002B_RS02945	Cp1002B_RS07510	0.877
Cp1002B_RS03640	Cp1002B_RS01875	0.877
Cp1002B_RS03605	Cp1002B_RS02755	0.877
Cp1002B_RS03070	Cp1002B_RS04285	0.877
Cp1002B_RS02920	Cp1002B_RS09630	0.877
Cp1002B_RS03570	Cp1002B_RS07190	0.877
Cp1002B_RS03915	Cp1002B_RS04550	0.877
Cp1002B_RS02975	Cp1002B_RS10720	0.877
Cp1002B_RS03275	Cp1002B_RS09745	0.877
Cp1002B_RS02755	Cp1002B_RS00935	0.877
Cp1002B_RS03405	Cp1002B_RS00590	0.877
Cp1002B_RS03570	Cp1002B_RS03840	0.877
Cp1002B_RS03770	Cp1002B_RS03405	0.877
Cp1002B_RS03590	Cp1002B_RS02460	0.877
Cp1002B_RS02945	Cp1002B_RS01940	0.877
Cp1002B_RS02975	Cp1002B_RS00670	0.877
Cp1002B_RS02705	Cp1002B_RS00705	0.877
Cp1002B_RS03420	Cp1002B_RS02920	0.877
Cp1002B_RS03080	Cp1002B_RS00670	0.877
Cp1002B_RS03570	Cp1002B_RS05250	0.877
Cp1002B_RS03275	Cp1002B_RS06795	0.877
Cp1002B_RS02920	Cp1002B_RS01450	0.877
Cp1002B_RS04230	Cp1002B_RS07775	0.877
Cp1002B_RS03450	Cp1002B_RS01200	0.877
Cp1002B_RS03570	Cp1002B_RS04080	0.877
Cp1002B_RS02920	Cp1002B_RS06065	0.877
Cp1002B_RS03770	Cp1002B_RS02035	0.877
Cp1002B_RS03205	Cp1002B_RS08480	0.877
Cp1002B_RS03275	Cp1002B_RS06465	0.877
Cp1002B_RS03450	Cp1002B_RS02645	0.877
Cp1002B_RS01110	Cp1002B_RS02835	0.877
Cp1002B_RS03590	Cp1002B_RS00295	0.877
Cp1002B_RS04230	Cp1002B_RS05185	0.877
Cp1002B_RS03205	Cp1002B_RS09420	0.877
Cp1002B_RS02920	Cp1002B_RS06165	0.877
Cp1002B_RS03915	Cp1002B_RS06075	0.876
Cp1002B_RS03590	Cp1002B_RS00805	0.876
Cp1002B_RS03275	Cp1002B_RS07945	0.876
Cp1002B_RS02705	Cp1002B_RS01935	0.876
Cp1002B_RS03915	Cp1002B_RS05145	0.876
Cp1002B_RS03450	Cp1002B_RS02070	0.876
Cp1002B_RS04475	Cp1002B_RS04990	0.876
Cp1002B_RS03275	Cp1002B_RS07725	0.876
Cp1002B_RS03205	Cp1002B_RS03885	0.876
Cp1002B_RS03205	Cp1002B_RS08585	0.876
Cp1002B_RS02705	Cp1002B_RS02605	0.876
Cp1002B_RS03275	Cp1002B_RS07340	0.876
Cp1002B_RS03605	Cp1002B_RS00360	0.876
Cp1002B_RS02760	Cp1002B_RS07190	0.876
Cp1002B_RS03915	Cp1002B_RS10865	0.876
Cp1002B_RS03660	Cp1002B_RS10720	0.876
Cp1002B_RS03205	Cp1002B_RS06510	0.876
Cp1002B_RS02705	Cp1002B_RS00490	0.876
Cp1002B_RS03915	Cp1002B_RS08780	0.876
Cp1002B_RS03605	Cp1002B_RS02095	0.876
Cp1002B_RS03570	Cp1002B_RS06425	0.876
Cp1002B_RS02755	Cp1002B_RS01320	0.876
Cp1002B_RS03590	Cp1002B_RS02110	0.876
Cp1002B_RS03450	Cp1002B_RS02650	0.876
Cp1002B_RS03405	Cp1002B_RS00065	0.876
Cp1002B_RS02825	Cp1002B_RS04760	0.876
Cp1002B_RS03770	Cp1002B_RS02295	0.876
Cp1002B_RS02755	Cp1002B_RS01405	0.876
Cp1002B_RS01025	Cp1002B_RS04495	0.876
Cp1002B_RS03650	Cp1002B_RS00840	0.876
Cp1002B_RS02945	Cp1002B_RS02920	0.876
Cp1002B_RS02755	Cp1002B_RS01520	0.876
Cp1002B_RS03770	Cp1002B_RS01405	0.876
Cp1002B_RS03770	Cp1002B_RS00840	0.876
Cp1002B_RS02920	Cp1002B_RS06700	0.876
Cp1002B_RS00770	Cp1002B_RS05820	0.876
Cp1002B_RS04015	Cp1002B_RS03770	0.876
Cp1002B_RS03025	Cp1002B_RS01750	0.876
Cp1002B_RS03915	Cp1002B_RS04295	0.876
Cp1002B_RS02945	Cp1002B_RS00755	0.876
Cp1002B_RS02920	Cp1002B_RS08140	0.876
Cp1002B_RS03590	Cp1002B_RS01515	0.876
Cp1002B_RS03645	Cp1002B_RS06655	0.876
Cp1002B_RS03915	Cp1002B_RS07750	0.876
Cp1002B_RS03590	Cp1002B_RS01600	0.876
Cp1002B_RS03915	Cp1002B_RS10400	0.876
Cp1002B_RS02835	Cp1002B_RS08945	0.876
Cp1002B_RS04015	Cp1002B_RS02630	0.876
Cp1002B_RS01725	Cp1002B_RS10195	0.876
Cp1002B_RS03205	Cp1002B_RS07235	0.876
Cp1002B_RS05080	Cp1002B_RS00770	0.876
Cp1002B_RS03675	Cp1002B_RS01880	0.875
Cp1002B_RS03605	Cp1002B_RS00705	0.875
Cp1002B_RS03685	Cp1002B_RS05135	0.875
Cp1002B_RS03605	Cp1002B_RS03560	0.875
Cp1002B_RS03675	Cp1002B_RS02945	0.875
Cp1002B_RS02920	Cp1002B_RS06930	0.875
Cp1002B_RS03650	Cp1002B_RS02295	0.875
Cp1002B_RS03590	Cp1002B_RS03140	0.875
Cp1002B_RS03645	Cp1002B_RS08105	0.875
Cp1002B_RS03640	Cp1002B_RS02705	0.875
Cp1002B_RS02920	Cp1002B_RS04420	0.875
Cp1002B_RS03685	Cp1002B_RS06135	0.875
Cp1002B_RS02920	Cp1002B_RS02850	0.875
Cp1002B_RS02920	Cp1002B_RS10475	0.875
Cp1002B_RS03140	Cp1002B_RS01810	0.875
Cp1002B_RS03915	Cp1002B_RS07165	0.875
Cp1002B_RS02755	Cp1002B_RS02650	0.875
Cp1002B_RS03770	Cp1002B_RS06970	0.875
Cp1002B_RS04250	Cp1002B_RS09660	0.875
Cp1002B_RS03570	Cp1002B_RS10555	0.875
Cp1002B_RS02755	Cp1002B_RS01920	0.875
Cp1002B_RS02755	Cp1002B_RS02070	0.875
Cp1002B_RS02755	Cp1002B_RS02105	0.875
Cp1002B_RS03570	Cp1002B_RS05800	0.875
Cp1002B_RS04250	Cp1002B_RS10405	0.875
Cp1002B_RS04380	Cp1002B_RS04760	0.875
Cp1002B_RS03505	Cp1002B_RS09930	0.875
Cp1002B_RS03405	Cp1002B_RS00965	0.875
Cp1002B_RS03570	Cp1002B_RS04770	0.875
Cp1002B_RS03915	Cp1002B_RS06635	0.875
Cp1002B_RS03275	Cp1002B_RS09665	0.875
Cp1002B_RS03915	Cp1002B_RS04385	0.875
Cp1002B_RS03570	Cp1002B_RS04440	0.875
Cp1002B_RS03470	Cp1002B_RS03590	0.875
Cp1002B_RS02760	Cp1002B_RS00750	0.875
Cp1002B_RS03470	Cp1002B_RS08605	0.875
Cp1002B_RS02755	Cp1002B_RS00840	0.875
Cp1002B_RS03915	Cp1002B_RS09160	0.875
Cp1002B_RS03570	Cp1002B_RS08120	0.875
Cp1002B_RS04015	Cp1002B_RS02925	0.875
Cp1002B_RS03275	Cp1002B_RS09820	0.875
Cp1002B_RS04015	Cp1002B_RS01875	0.875
Cp1002B_RS04015	Cp1002B_RS00170	0.875
Cp1002B_RS03275	Cp1002B_RS06460	0.875
Cp1002B_RS03275	Cp1002B_RS05975	0.875
Cp1002B_RS04250	Cp1002B_RS08770	0.875
Cp1002B_RS03275	Cp1002B_RS10735	0.875
Cp1002B_RS02710	Cp1002B_RS08510	0.875
Cp1002B_RS03570	Cp1002B_RS06855	0.875
Cp1002B_RS03350	Cp1002B_RS09510	0.875
Cp1002B_RS03915	Cp1002B_RS09420	0.875
Cp1002B_RS03570	Cp1002B_RS09180	0.875
Cp1002B_RS03470	Cp1002B_RS08600	0.875
Cp1002B_RS04250	Cp1002B_RS09490	0.875
Cp1002B_RS03915	Cp1002B_RS09305	0.875
Cp1002B_RS02760	Cp1002B_RS01385	0.875
Cp1002B_RS03915	Cp1002B_RS06325	0.875
Cp1002B_RS03275	Cp1002B_RS09545	0.875
Cp1002B_RS02880	Cp1002B_RS04910	0.875
Cp1002B_RS00770	Cp1002B_RS00105	0.875
Cp1002B_RS03685	Cp1002B_RS09660	0.875
Cp1002B_RS03685	Cp1002B_RS09490	0.875
Cp1002B_RS03590	Cp1002B_RS02485	0.875
Cp1002B_RS03450	Cp1002B_RS02045	0.875
Cp1002B_RS03450	Cp1002B_RS02035	0.875
Cp1002B_RS03205	Cp1002B_RS05890	0.875
Cp1002B_RS03450	Cp1002B_RS01905	0.875
Cp1002B_RS03450	Cp1002B_RS00895	0.875
Cp1002B_RS00770	Cp1002B_RS05505	0.875
Cp1002B_RS02945	Cp1002B_RS08140	0.874
Cp1002B_RS02920	Cp1002B_RS01315	0.874
Cp1002B_RS03350	Cp1002B_RS10405	0.874
Cp1002B_RS03685	Cp1002B_RS08300	0.874
Cp1002B_RS03685	Cp1002B_RS08470	0.874
Cp1002B_RS00070	Cp1002B_RS01720	0.874
Cp1002B_RS03685	Cp1002B_RS08885	0.874
Cp1002B_RS03470	Cp1002B_RS06345	0.874
Cp1002B_RS03470	Cp1002B_RS08250	0.874
Cp1002B_RS03915	Cp1002B_RS08815	0.874
Cp1002B_RS03450	Cp1002B_RS02110	0.874
Cp1002B_RS03605	Cp1002B_RS01925	0.874
Cp1002B_RS04015	Cp1002B_RS02705	0.874
Cp1002B_RS03205	Cp1002B_RS03590	0.874
Cp1002B_RS03275	Cp1002B_RS09265	0.874
Cp1002B_RS02920	Cp1002B_RS09210	0.874
Cp1002B_RS03685	Cp1002B_RS06640	0.874
Cp1002B_RS04015	Cp1002B_RS01920	0.874
Cp1002B_RS03470	Cp1002B_RS06590	0.874
Cp1002B_RS04015	Cp1002B_RS01200	0.874
Cp1002B_RS03685	Cp1002B_RS08165	0.874
Cp1002B_RS02920	Cp1002B_RS00985	0.874
Cp1002B_RS03275	Cp1002B_RS07375	0.874
Cp1002B_RS03350	Cp1002B_RS08770	0.874
Cp1002B_RS03450	Cp1002B_RS00840	0.874
Cp1002B_RS03275	Cp1002B_RS06165	0.874
Cp1002B_RS03570	Cp1002B_RS07170	0.874
Cp1002B_RS03075	Cp1002B_RS09825	0.874
Cp1002B_RS03685	Cp1002B_RS07420	0.874
Cp1002B_RS00670	Cp1002B_RS03510	0.874
Cp1002B_RS03275	Cp1002B_RS05030	0.874
Cp1002B_RS02920	Cp1002B_RS05800	0.874
Cp1002B_RS03685	Cp1002B_RS03770	0.874
Cp1002B_RS03470	Cp1002B_RS07180	0.874
Cp1002B_RS03350	Cp1002B_RS09490	0.874
Cp1002B_RS02705	Cp1002B_RS01015	0.874
Cp1002B_RS03450	Cp1002B_RS02180	0.874
Cp1002B_RS05300	Cp1002B_RS01170	0.874
Cp1002B_RS03205	Cp1002B_RS08305	0.874
Cp1002B_RS03470	Cp1002B_RS04175	0.874
Cp1002B_RS03205	Cp1002B_RS07505	0.874
Cp1002B_RS03050	Cp1002B_RS05300	0.874
Cp1002B_RS03685	Cp1002B_RS05370	0.874
Cp1002B_RS03915	Cp1002B_RS00295	0.874
Cp1002B_RS03205	Cp1002B_RS06050	0.874
Cp1002B_RS03650	Cp1002B_RS03640	0.874
Cp1002B_RS03605	Cp1002B_RS02605	0.874
Cp1002B_RS03205	Cp1002B_RS06600	0.874
Cp1002B_RS03470	Cp1002B_RS04385	0.874
Cp1002B_RS03640	Cp1002B_RS02630	0.874
Cp1002B_RS02920	Cp1002B_RS04505	0.874
Cp1002B_RS03470	Cp1002B_RS09780	0.874
Cp1002B_RS03205	Cp1002B_RS06550	0.874
Cp1002B_RS03770	Cp1002B_RS03590	0.874
Cp1002B_RS03675	Cp1002B_RS00755	0.874
Cp1002B_RS02760	Cp1002B_RS00435	0.874
Cp1002B_RS04250	Cp1002B_RS08300	0.874
Cp1002B_RS01165	Cp1002B_RS09385	0.874
Cp1002B_RS03685	Cp1002B_RS06025	0.874
Cp1002B_RS02760	Cp1002B_RS02685	0.874
Cp1002B_RS03675	Cp1002B_RS01385	0.874
Cp1002B_RS03685	Cp1002B_RS10405	0.874
Cp1002B_RS03915	Cp1002B_RS07180	0.874
Cp1002B_RS01670	Cp1002B_RS01050	0.874
Cp1002B_RS03915	Cp1002B_RS08170	0.874
Cp1002B_RS04250	Cp1002B_RS08150	0.874
Cp1002B_RS04250	Cp1002B_RS08470	0.874
Cp1002B_RS03650	Cp1002B_RS03405	0.874
Cp1002B_RS03470	Cp1002B_RS09305	0.874
Cp1002B_RS03055	Cp1002B_RS02260	0.874
Cp1002B_RS03485	Cp1002B_RS01250	0.874
Cp1002B_RS03915	Cp1002B_RS06945	0.874
Cp1002B_RS03650	Cp1002B_RS00935	0.874
Cp1002B_RS03470	Cp1002B_RS05885	0.874
Cp1002B_RS04495	Cp1002B_RS05440	0.874
Cp1002B_RS03645	Cp1002B_RS06510	0.874
Cp1002B_RS03405	Cp1002B_RS01375	0.874
Cp1002B_RS03470	Cp1002B_RS08780	0.874
Cp1002B_RS03470	Cp1002B_RS08470	0.873
Cp1002B_RS02700	Cp1002B_RS05135	0.873
Cp1002B_RS04250	Cp1002B_RS08255	0.873
Cp1002B_RS03470	Cp1002B_RS09395	0.873
Cp1002B_RS03350	Cp1002B_RS08150	0.873
Cp1002B_RS02945	Cp1002B_RS06460	0.873
Cp1002B_RS03350	Cp1002B_RS07640	0.873
Cp1002B_RS03505	Cp1002B_RS00915	0.873
Cp1002B_RS04250	Cp1002B_RS07640	0.873
Cp1002B_RS03205	Cp1002B_RS03560	0.873
Cp1002B_RS02945	Cp1002B_RS07945	0.873
Cp1002B_RS04595	Cp1002B_RS06695	0.873
Cp1002B_RS03450	Cp1002B_RS01420	0.873
Cp1002B_RS03450	Cp1002B_RS02295	0.873
Cp1002B_RS03450	Cp1002B_RS02555	0.873
Cp1002B_RS00770	Cp1002B_RS04390	0.873
Cp1002B_RS03645	Cp1002B_RS06635	0.873
Cp1002B_RS05300	Cp1002B_RS02515	0.873
Cp1002B_RS03455	Cp1002B_RS05790	0.873
Cp1002B_RS03050	Cp1002B_RS07665	0.873
Cp1002B_RS03405	Cp1002B_RS02605	0.873
Cp1002B_RS03470	Cp1002B_RS04670	0.873
Cp1002B_RS03640	Cp1002B_RS01705	0.873
Cp1002B_RS03405	Cp1002B_RS02455	0.873
Cp1002B_RS03640	Cp1002B_RS01210	0.873
Cp1002B_RS03405	Cp1002B_RS01810	0.873
Cp1002B_RS03470	Cp1002B_RS08170	0.873
Cp1002B_RS04475	Cp1002B_RS10130	0.873
Cp1002B_RS04475	Cp1002B_RS09655	0.873
Cp1002B_RS03470	Cp1002B_RS05900	0.873
Cp1002B_RS03045	Cp1002B_RS02670	0.873
Cp1002B_RS01725	Cp1002B_RS10665	0.873
Cp1002B_RS03405	Cp1002B_RS01135	0.873
Cp1002B_RS02700	Cp1002B_RS03770	0.873
Cp1002B_RS03390	Cp1002B_RS09930	0.873
Cp1002B_RS03650	Cp1002B_RS01520	0.873
Cp1002B_RS04250	Cp1002B_RS09555	0.873
Cp1002B_RS03470	Cp1002B_RS06430	0.873
Cp1002B_RS03650	Cp1002B_RS02070	0.873
Cp1002B_RS02700	Cp1002B_RS04695	0.873
Cp1002B_RS04250	Cp1002B_RS07420	0.873
Cp1002B_RS03350	Cp1002B_RS03770	0.873
Cp1002B_RS04250	Cp1002B_RS07285	0.873
Cp1002B_RS03275	Cp1002B_RS04030	0.873
Cp1002B_RS02920	Cp1002B_RS06955	0.873
Cp1002B_RS03205	Cp1002B_RS08560	0.873
Cp1002B_RS03205	Cp1002B_RS08605	0.873
Cp1002B_RS03915	Cp1002B_RS06095	0.873
Cp1002B_RS03915	Cp1002B_RS06510	0.873
Cp1002B_RS03915	Cp1002B_RS06600	0.873
Cp1002B_RS03915	Cp1002B_RS07235	0.873
Cp1002B_RS03915	Cp1002B_RS07265	0.873
Cp1002B_RS03915	Cp1002B_RS07505	0.873
Cp1002B_RS03915	Cp1002B_RS07620	0.873
Cp1002B_RS02755	Cp1002B_RS02695	0.873
Cp1002B_RS03685	Cp1002B_RS04955	0.873
Cp1002B_RS03915	Cp1002B_RS08265	0.873
Cp1002B_RS02700	Cp1002B_RS06135	0.873
Cp1002B_RS02755	Cp1002B_RS02110	0.873
Cp1002B_RS03685	Cp1002B_RS04695	0.873
Cp1002B_RS03605	Cp1002B_RS01015	0.873
Cp1002B_RS03915	Cp1002B_RS08720	0.873
Cp1002B_RS03570	Cp1002B_RS10275	0.873
Cp1002B_RS02710	Cp1002B_RS00140	0.873
Cp1002B_RS03275	Cp1002B_RS03570	0.873
Cp1002B_RS03910	Cp1002B_RS01810	0.873
Cp1002B_RS03590	Cp1002B_RS01865	0.873
Cp1002B_RS03685	Cp1002B_RS05395	0.873
Cp1002B_RS03685	Cp1002B_RS06130	0.873
Cp1002B_RS03685	Cp1002B_RS06645	0.873
Cp1002B_RS03685	Cp1002B_RS07280	0.873
Cp1002B_RS02830	Cp1002B_RS05810	0.873
Cp1002B_RS02765	Cp1002B_RS02920	0.873
Cp1002B_RS03685	Cp1002B_RS08255	0.873
Cp1002B_RS03205	Cp1002B_RS05070	0.873
Cp1002B_RS03685	Cp1002B_RS09160	0.873
Cp1002B_RS03685	Cp1002B_RS06345	0.873
Cp1002B_RS03685	Cp1002B_RS09780	0.873
Cp1002B_RS03590	Cp1002B_RS02400	0.873
Cp1002B_RS03205	Cp1002B_RS06590	0.873
Cp1002B_RS02920	Cp1002B_RS04750	0.873
Cp1002B_RS03720	Cp1002B_RS04595	0.873
Cp1002B_RS03590	Cp1002B_RS02240	0.873
Cp1002B_RS03770	Cp1002B_RS02180	0.873
Cp1002B_RS03770	Cp1002B_RS03685	0.873
Cp1002B_RS02920	Cp1002B_RS05895	0.873
Cp1002B_RS02760	Cp1002B_RS01080	0.873
Cp1002B_RS02760	Cp1002B_RS00080	0.873
Cp1002B_RS03590	Cp1002B_RS01935	0.873
Cp1002B_RS03685	Cp1002B_RS04415	0.873
Cp1002B_RS03915	Cp1002B_RS08480	0.873
Cp1002B_RS03645	Cp1002B_RS08560	0.873
Cp1002B_RS02945	Cp1002B_RS01880	0.873
Cp1002B_RS03570	Cp1002B_RS04635	0.873
Cp1002B_RS03675	Cp1002B_RS03155	0.873
Cp1002B_RS03275	Cp1002B_RS09210	0.873
Cp1002B_RS03675	Cp1002B_RS01445	0.873
Cp1002B_RS03570	Cp1002B_RS03675	0.873
Cp1002B_RS03350	Cp1002B_RS06025	0.873
Cp1002B_RS02945	Cp1002B_RS01680	0.873
Cp1002B_RS03675	Cp1002B_RS01080	0.873
Cp1002B_RS03275	Cp1002B_RS08140	0.873
Cp1002B_RS03965	Cp1002B_RS01095	0.873
Cp1002B_RS02940	Cp1002B_RS05600	0.873
Cp1002B_RS03350	Cp1002B_RS04895	0.873
Cp1002B_RS03675	Cp1002B_RS00750	0.873
Cp1002B_RS03275	Cp1002B_RS05350	0.873
Cp1002B_RS02705	Cp1002B_RS00085	0.873
Cp1002B_RS03570	Cp1002B_RS05140	0.873
Cp1002B_RS03915	Cp1002B_RS10365	0.873
Cp1002B_RS03675	Cp1002B_RS00435	0.873
Cp1002B_RS03350	Cp1002B_RS06045	0.873
Cp1002B_RS03350	Cp1002B_RS06135	0.873
Cp1002B_RS02945	Cp1002B_RS01445	0.873
Cp1002B_RS03205	Cp1002B_RS05905	0.872
Cp1002B_RS03470	Cp1002B_RS08930	0.872
Cp1002B_RS03470	Cp1002B_RS08885	0.872
Cp1002B_RS03405	Cp1002B_RS03135	0.872
Cp1002B_RS03470	Cp1002B_RS03810	0.872
Cp1002B_RS03350	Cp1002B_RS08035	0.872
Cp1002B_RS03645	Cp1002B_RS06920	0.872
Cp1002B_RS03570	Cp1002B_RS04775	0.872
Cp1002B_RS03350	Cp1002B_RS07890	0.872
Cp1002B_RS03590	Cp1002B_RS03195	0.872
Cp1002B_RS03645	Cp1002B_RS07600	0.872
Cp1002B_RS03350	Cp1002B_RS06035	0.872
Cp1002B_RS03475	Cp1002B_RS04495	0.872
Cp1002B_RS03205	Cp1002B_RS04645	0.872
Cp1002B_RS03545	Cp1002B_RS05495	0.872
Cp1002B_RS03205	Cp1002B_RS03450	0.872
Cp1002B_RS03435	Cp1002B_RS01810	0.872
Cp1002B_RS03590	Cp1002B_RS03490	0.872
Cp1002B_RS03470	Cp1002B_RS06640	0.872
Cp1002B_RS03155	Cp1002B_RS07365	0.872
Cp1002B_RS03205	Cp1002B_RS09425	0.872
Cp1002B_RS03470	Cp1002B_RS06645	0.872
Cp1002B_RS03275	Cp1002B_RS04045	0.872
Cp1002B_RS03570	Cp1002B_RS08145	0.872
Cp1002B_RS03570	Cp1002B_RS09390	0.872
Cp1002B_RS03350	Cp1002B_RS09405	0.872
Cp1002B_RS03470	Cp1002B_RS06325	0.872
Cp1002B_RS03470	Cp1002B_RS07280	0.872
Cp1002B_RS03605	Cp1002B_RS03105	0.872
Cp1002B_RS03405	Cp1002B_RS00270	0.872
Cp1002B_RS03470	Cp1002B_RS07415	0.872
Cp1002B_RS03470	Cp1002B_RS07420	0.872
Cp1002B_RS03350	Cp1002B_RS08750	0.872
Cp1002B_RS03275	Cp1002B_RS08665	0.872
Cp1002B_RS03205	Cp1002B_RS09395	0.872
Cp1002B_RS03605	Cp1002B_RS00160	0.872
Cp1002B_RS03205	Cp1002B_RS09250	0.872
Cp1002B_RS03470	Cp1002B_RS08300	0.872
Cp1002B_RS03470	Cp1002B_RS05640	0.872
Cp1002B_RS03625	Cp1002B_RS08355	0.872
Cp1002B_RS03570	Cp1002B_RS07090	0.872
Cp1002B_RS03470	Cp1002B_RS05365	0.872
Cp1002B_RS03205	Cp1002B_RS07780	0.872
Cp1002B_RS03205	Cp1002B_RS07250	0.872
Cp1002B_RS03470	Cp1002B_RS05135	0.872
Cp1002B_RS03350	Cp1002B_RS03650	0.872
Cp1002B_RS03470	Cp1002B_RS06570	0.872
Cp1002B_RS03570	Cp1002B_RS05275	0.872
Cp1002B_RS03350	Cp1002B_RS08300	0.872
Cp1002B_RS03350	Cp1002B_RS08395	0.872
Cp1002B_RS00060	Cp1002B_RS00800	0.872
Cp1002B_RS02700	Cp1002B_RS08900	0.872
Cp1002B_RS01165	Cp1002B_RS05685	0.872
Cp1002B_RS04015	Cp1002B_RS02645	0.872
Cp1002B_RS04250	Cp1002B_RS07820	0.872
Cp1002B_RS03050	Cp1002B_RS03510	0.872
Cp1002B_RS03715	Cp1002B_RS04480	0.872
Cp1002B_RS02755	Cp1002B_RS00270	0.872
Cp1002B_RS04015	Cp1002B_RS02985	0.872
Cp1002B_RS03685	Cp1002B_RS04895	0.872
Cp1002B_RS02700	Cp1002B_RS09490	0.872
Cp1002B_RS02700	Cp1002B_RS06025	0.872
Cp1002B_RS02700	Cp1002B_RS08770	0.872
Cp1002B_RS02700	Cp1002B_RS06020	0.872
Cp1002B_RS02700	Cp1002B_RS08765	0.872
Cp1002B_RS04250	Cp1002B_RS09305	0.872
Cp1002B_RS03685	Cp1002B_RS08130	0.872
Cp1002B_RS04150	Cp1002B_RS04700	0.872
Cp1002B_RS03985	Cp1002B_RS01730	0.872
Cp1002B_RS02700	Cp1002B_RS06100	0.872
Cp1002B_RS04250	Cp1002B_RS08160	0.872
Cp1002B_RS02700	Cp1002B_RS06070	0.872
Cp1002B_RS03650	Cp1002B_RS02400	0.872
Cp1002B_RS02700	Cp1002B_RS08885	0.872
Cp1002B_RS02700	Cp1002B_RS06040	0.872
Cp1002B_RS03915	Cp1002B_RS09625	0.872
Cp1002B_RS04250	Cp1002B_RS10410	0.872
Cp1002B_RS02705	Cp1002B_RS01320	0.872
Cp1002B_RS02920	Cp1002B_RS09585	0.872
Cp1002B_RS02700	Cp1002B_RS06085	0.872
Cp1002B_RS03890	Cp1002B_RS01800	0.872
Cp1002B_RS02700	Cp1002B_RS02705	0.872
Cp1002B_RS02700	Cp1002B_RS05805	0.872
Cp1002B_RS02920	Cp1002B_RS10555	0.872
Cp1002B_RS05300	Cp1002B_RS00475	0.872
Cp1002B_RS02700	Cp1002B_RS08165	0.872
Cp1002B_RS02700	Cp1002B_RS08755	0.872
Cp1002B_RS02700	Cp1002B_RS08750	0.872
Cp1002B_RS02700	Cp1002B_RS04415	0.872
Cp1002B_RS04015	Cp1002B_RS00895	0.872
Cp1002B_RS02700	Cp1002B_RS06570	0.872
Cp1002B_RS02700	Cp1002B_RS05370	0.872
Cp1002B_RS04475	Cp1002B_RS09500	0.872
Cp1002B_RS03770	Cp1002B_RS02110	0.872
Cp1002B_RS02700	Cp1002B_RS03205	0.872
Cp1002B_RS04880	Cp1002B_RS04380	0.872
Cp1002B_RS02700	Cp1002B_RS08625	0.872
Cp1002B_RS03685	Cp1002B_RS05970	0.872
Cp1002B_RS03645	Cp1002B_RS08815	0.872
Cp1002B_RS04250	Cp1002B_RS08395	0.872
Cp1002B_RS02700	Cp1002B_RS05265	0.872
Cp1002B_RS02700	Cp1002B_RS05280	0.872
Cp1002B_RS02700	Cp1002B_RS06640	0.872
Cp1002B_RS01590	Cp1002B_RS04760	0.872
Cp1002B_RS03915	Cp1002B_RS07920	0.872
Cp1002B_RS02705	Cp1002B_RS02700	0.872
Cp1002B_RS04015	Cp1002B_RS03650	0.872
Cp1002B_RS03685	Cp1002B_RS07285	0.872
Cp1002B_RS03915	Cp1002B_RS10295	0.872
Cp1002B_RS02700	Cp1002B_RS08395	0.872
Cp1002B_RS04760	Cp1002B_RS04835	0.872
Cp1002B_RS03685	Cp1002B_RS07750	0.872
Cp1002B_RS03965	Cp1002B_RS03045	0.872
Cp1002B_RS02700	Cp1002B_RS10410	0.872
Cp1002B_RS02700	Cp1002B_RS09660	0.872
Cp1002B_RS02700	Cp1002B_RS10405	0.872
Cp1002B_RS03685	Cp1002B_RS05630	0.872
Cp1002B_RS03685	Cp1002B_RS07180	0.872
Cp1002B_RS03915	Cp1002B_RS08305	0.872
Cp1002B_RS03685	Cp1002B_RS05885	0.872
Cp1002B_RS03685	Cp1002B_RS10865	0.872
Cp1002B_RS03470	Cp1002B_RS06000	0.871
Cp1002B_RS04495	Cp1002B_RS10205	0.871
Cp1002B_RS04495	Cp1002B_RS10130	0.871
Cp1002B_RS04230	Cp1002B_RS02785	0.871
Cp1002B_RS03770	Cp1002B_RS01905	0.871
Cp1002B_RS04250	Cp1002B_RS08280	0.871
Cp1002B_RS03205	Cp1002B_RS05380	0.871
Cp1002B_RS03685	Cp1002B_RS08160	0.871
Cp1002B_RS02700	Cp1002B_RS07800	0.871
Cp1002B_RS02920	Cp1002B_RS01355	0.871
Cp1002B_RS03470	Cp1002B_RS09490	0.871
Cp1002B_RS02700	Cp1002B_RS03090	0.871
Cp1002B_RS03685	Cp1002B_RS07640	0.871
Cp1002B_RS03685	Cp1002B_RS07890	0.871
Cp1002B_RS03350	Cp1002B_RS07325	0.871
Cp1002B_RS03685	Cp1002B_RS09510	0.871
Cp1002B_RS04595	Cp1002B_RS02810	0.871
Cp1002B_RS02700	Cp1002B_RS05420	0.871
Cp1002B_RS03685	Cp1002B_RS08750	0.871
Cp1002B_RS03205	Cp1002B_RS05130	0.871
Cp1002B_RS03685	Cp1002B_RS08900	0.871
Cp1002B_RS03685	Cp1002B_RS09305	0.871
Cp1002B_RS02705	Cp1002B_RS02575	0.871
Cp1002B_RS02700	Cp1002B_RS04020	0.871
Cp1002B_RS03405	Cp1002B_RS03380	0.871
Cp1002B_RS03590	Cp1002B_RS01595	0.871
Cp1002B_RS04250	Cp1002B_RS07180	0.871
Cp1002B_RS01480	Cp1002B_RS04440	0.871
Cp1002B_RS03205	Cp1002B_RS07735	0.871
Cp1002B_RS03915	Cp1002B_RS04645	0.871
Cp1002B_RS03205	Cp1002B_RS07840	0.871
Cp1002B_RS03590	Cp1002B_RS00085	0.871
Cp1002B_RS04250	Cp1002B_RS06950	0.871
Cp1002B_RS03915	Cp1002B_RS08560	0.871
Cp1002B_RS04250	Cp1002B_RS06945	0.871
Cp1002B_RS03570	Cp1002B_RS03935	0.871
Cp1002B_RS02755	Cp1002B_RS01935	0.871
Cp1002B_RS03470	Cp1002B_RS04960	0.871
Cp1002B_RS03205	Cp1002B_RS08330	0.871
Cp1002B_RS03350	Cp1002B_RS05805	0.871
Cp1002B_RS02470	Cp1002B_RS06300	0.871
Cp1002B_RS02415	Cp1002B_RS04475	0.871
Cp1002B_RS03915	Cp1002B_RS08100	0.871
Cp1002B_RS02700	Cp1002B_RS06985	0.871
Cp1002B_RS02700	Cp1002B_RS06935	0.871
Cp1002B_RS03915	Cp1002B_RS07780	0.871
Cp1002B_RS03590	Cp1002B_RS00965	0.871
Cp1002B_RS03350	Cp1002B_RS04460	0.871
Cp1002B_RS03205	Cp1002B_RS09165	0.871
Cp1002B_RS03350	Cp1002B_RS04955	0.871
Cp1002B_RS03915	Cp1002B_RS06920	0.871
Cp1002B_RS03350	Cp1002B_RS06100	0.871
Cp1002B_RS02700	Cp1002B_RS06245	0.871
Cp1002B_RS03485	Cp1002B_RS09550	0.871
Cp1002B_RS04250	Cp1002B_RS07255	0.871
Cp1002B_RS01485	Cp1002B_RS00670	0.871
Cp1002B_RS03205	Cp1002B_RS06255	0.871
Cp1002B_RS03825	Cp1002B_RS01655	0.871
Cp1002B_RS03350	Cp1002B_RS06570	0.871
Cp1002B_RS03915	Cp1002B_RS09250	0.871
Cp1002B_RS02700	Cp1002B_RS07280	0.871
Cp1002B_RS03825	Cp1002B_RS02645	0.871
Cp1002B_RS03570	Cp1002B_RS09235	0.871
Cp1002B_RS02710	Cp1002B_RS10635	0.871
Cp1002B_RS02755	Cp1002B_RS10405	0.871
Cp1002B_RS02700	Cp1002B_RS05355	0.871
Cp1002B_RS05030	Cp1002B_RS02920	0.871
Cp1002B_RS02700	Cp1002B_RS06045	0.871
Cp1002B_RS03825	Cp1002B_RS03650	0.871
Cp1002B_RS02755	Cp1002B_RS09660	0.871
Cp1002B_RS03205	Cp1002B_RS06915	0.871
Cp1002B_RS04705	Cp1002B_RS01810	0.871
Cp1002B_RS02755	Cp1002B_RS09490	0.871
Cp1002B_RS03470	Cp1002B_RS03915	0.871
Cp1002B_RS03915	Cp1002B_RS00840	0.871
Cp1002B_RS02515	Cp1002B_RS10670	0.871
Cp1002B_RS01480	Cp1002B_RS03840	0.871
Cp1002B_RS02755	Cp1002B_RS00115	0.871
Cp1002B_RS03470	Cp1002B_RS04345	0.871
Cp1002B_RS03915	Cp1002B_RS02705	0.871
Cp1002B_RS02920	Cp1002B_RS02165	0.871
Cp1002B_RS03350	Cp1002B_RS07380	0.871
Cp1002B_RS02700	Cp1002B_RS06645	0.871
Cp1002B_RS03350	Cp1002B_RS09555	0.871
Cp1002B_RS03050	Cp1002B_RS03950	0.871
Cp1002B_RS02700	Cp1002B_RS08255	0.871
Cp1002B_RS03640	Cp1002B_RS00585	0.871
Cp1002B_RS03640	Cp1002B_RS01185	0.871
Cp1002B_RS01480	Cp1002B_RS10475	0.871
Cp1002B_RS02700	Cp1002B_RS05040	0.871
Cp1002B_RS02700	Cp1002B_RS08035	0.871
Cp1002B_RS03645	Cp1002B_RS10295	0.871
Cp1002B_RS02700	Cp1002B_RS05060	0.871
Cp1002B_RS03640	Cp1002B_RS02755	0.871
Cp1002B_RS03450	Cp1002B_RS00445	0.871
Cp1002B_RS03470	Cp1002B_RS05560	0.871
Cp1002B_RS03050	Cp1002B_RS10720	0.871
Cp1002B_RS03470	Cp1002B_RS08720	0.871
Cp1002B_RS03470	Cp1002B_RS08160	0.871
Cp1002B_RS03625	Cp1002B_RS01910	0.871
Cp1002B_RS03350	Cp1002B_RS09270	0.871
Cp1002B_RS03625	Cp1002B_RS00670	0.871
Cp1002B_RS03955	Cp1002B_RS01810	0.871
Cp1002B_RS02700	Cp1002B_RS04955	0.871
Cp1002B_RS03470	Cp1002B_RS07390	0.871
Cp1002B_RS04250	Cp1002B_RS08900	0.871
Cp1002B_RS02975	Cp1002B_RS01050	0.871
Cp1002B_RS02970	Cp1002B_RS04230	0.871
Cp1002B_RS02700	Cp1002B_RS09160	0.871
Cp1002B_RS03605	Cp1002B_RS03325	0.871
Cp1002B_RS02945	Cp1002B_RS03200	0.871
Cp1002B_RS03605	Cp1002B_RS03195	0.871
Cp1002B_RS02700	Cp1002B_RS08930	0.871
Cp1002B_RS03350	Cp1002B_RS08900	0.871
Cp1002B_RS03605	Cp1002B_RS02700	0.871
Cp1002B_RS03055	Cp1002B_RS05020	0.871
Cp1002B_RS03570	Cp1002B_RS07945	0.871
Cp1002B_RS03350	Cp1002B_RS08930	0.871
Cp1002B_RS03685	Cp1002B_RS06035	0.871
Cp1002B_RS02700	Cp1002B_RS09620	0.871
Cp1002B_RS04250	Cp1002B_RS09405	0.871
Cp1002B_RS03350	Cp1002B_RS08255	0.871
Cp1002B_RS03685	Cp1002B_RS05805	0.871
Cp1002B_RS04250	Cp1002B_RS09510	0.871
Cp1002B_RS03275	Cp1002B_RS05915	0.871
Cp1002B_RS02700	Cp1002B_RS04000	0.871
Cp1002B_RS03645	Cp1002B_RS07265	0.871
Cp1002B_RS02700	Cp1002B_RS08470	0.871
Cp1002B_RS02700	Cp1002B_RS06750	0.87
Cp1002B_RS03450	Cp1002B_RS01425	0.87
Cp1002B_RS02755	Cp1002B_RS06100	0.87
Cp1002B_RS02700	Cp1002B_RS06945	0.87
Cp1002B_RS02700	Cp1002B_RS08160	0.87
Cp1002B_RS02700	Cp1002B_RS06595	0.87
Cp1002B_RS02700	Cp1002B_RS03915	0.87
Cp1002B_RS02755	Cp1002B_RS08770	0.87
Cp1002B_RS03645	Cp1002B_RS09895	0.87
Cp1002B_RS03645	Cp1002B_RS08720	0.87
Cp1002B_RS02700	Cp1002B_RS08825	0.87
Cp1002B_RS02755	Cp1002B_RS05135	0.87
Cp1002B_RS04250	Cp1002B_RS07380	0.87
Cp1002B_RS02700	Cp1002B_RS06075	0.87
Cp1002B_RS00180	Cp1002B_RS04495	0.87
Cp1002B_RS02755	Cp1002B_RS09305	0.87
Cp1002B_RS02585	Cp1002B_RS04495	0.87
Cp1002B_RS02700	Cp1002B_RS03685	0.87
Cp1002B_RS03450	Cp1002B_RS01405	0.87
Cp1002B_RS03645	Cp1002B_RS08745	0.87
Cp1002B_RS01480	Cp1002B_RS06450	0.87
Cp1002B_RS02755	Cp1002B_RS04955	0.87
Cp1002B_RS03470	Cp1002B_RS05910	0.87
Cp1002B_RS03605	Cp1002B_RS03380	0.87
Cp1002B_RS04015	Cp1002B_RS01705	0.87
Cp1002B_RS03470	Cp1002B_RS06190	0.87
Cp1002B_RS02700	Cp1002B_RS06950	0.87
Cp1002B_RS02700	Cp1002B_RS04295	0.87
Cp1002B_RS02755	Cp1002B_RS08470	0.87
Cp1002B_RS03405	Cp1002B_RS00975	0.87
Cp1002B_RS03915	Cp1002B_RS08600	0.87
Cp1002B_RS03205	Cp1002B_RS08745	0.87
Cp1002B_RS02700	Cp1002B_RS07070	0.87
Cp1002B_RS02700	Cp1002B_RS04365	0.87
Cp1002B_RS03350	Cp1002B_RS10075	0.87
Cp1002B_RS03915	Cp1002B_RS05070	0.87
Cp1002B_RS03645	Cp1002B_RS06325	0.87
Cp1002B_RS03470	Cp1002B_RS06415	0.87
Cp1002B_RS03590	Cp1002B_RS01195	0.87
Cp1002B_RS03915	Cp1002B_RS05380	0.87
Cp1002B_RS03350	Cp1002B_RS05375	0.87
Cp1002B_RS03350	Cp1002B_RS10410	0.87
Cp1002B_RS03645	Cp1002B_RS06915	0.87
Cp1002B_RS03915	Cp1002B_RS05905	0.87
Cp1002B_RS03450	Cp1002B_RS00480	0.87
Cp1002B_RS03470	Cp1002B_RS05095	0.87
Cp1002B_RS03605	Cp1002B_RS02950	0.87
Cp1002B_RS02700	Cp1002B_RS07165	0.87
Cp1002B_RS03350	Cp1002B_RS06040	0.87
Cp1002B_RS03470	Cp1002B_RS06595	0.87
Cp1002B_RS03350	Cp1002B_RS05270	0.87
Cp1002B_RS03350	Cp1002B_RS09780	0.87
Cp1002B_RS02700	Cp1002B_RS06345	0.87
Cp1002B_RS02700	Cp1002B_RS07180	0.87
Cp1002B_RS03100	Cp1002B_RS04700	0.87
Cp1002B_RS03545	Cp1002B_RS08050	0.87
Cp1002B_RS03350	Cp1002B_RS09580	0.87
Cp1002B_RS02755	Cp1002B_RS00445	0.87
Cp1002B_RS02755	Cp1002B_RS08300	0.87
Cp1002B_RS03350	Cp1002B_RS06085	0.87
Cp1002B_RS03450	Cp1002B_RS01320	0.87
Cp1002B_RS03915	Cp1002B_RS06550	0.87
Cp1002B_RS03685	Cp1002B_RS06590	0.87
Cp1002B_RS03685	Cp1002B_RS06595	0.87
Cp1002B_RS02920	Cp1002B_RS07175	0.87
Cp1002B_RS03350	Cp1002B_RS08280	0.87
Cp1002B_RS02700	Cp1002B_RS05145	0.87
Cp1002B_RS03685	Cp1002B_RS08585	0.87
Cp1002B_RS03205	Cp1002B_RS04905	0.87
Cp1002B_RS03685	Cp1002B_RS08600	0.87
Cp1002B_RS03470	Cp1002B_RS08770	0.87
Cp1002B_RS03950	Cp1002B_RS10150	0.87
Cp1002B_RS03685	Cp1002B_RS08765	0.87
Cp1002B_RS02700	Cp1002B_RS02985	0.87
Cp1002B_RS02705	Cp1002B_RS01285	0.87
Cp1002B_RS02700	Cp1002B_RS09405	0.87
Cp1002B_RS03405	Cp1002B_RS00115	0.87
Cp1002B_RS02920	Cp1002B_RS09235	0.87
Cp1002B_RS03605	Cp1002B_RS02575	0.87
Cp1002B_RS03685	Cp1002B_RS09395	0.87
Cp1002B_RS03685	Cp1002B_RS09405	0.87
Cp1002B_RS03685	Cp1002B_RS04460	0.87
Cp1002B_RS03350	Cp1002B_RS07180	0.87
Cp1002B_RS03605	Cp1002B_RS01285	0.87
Cp1002B_RS04250	Cp1002B_RS08585	0.87
Cp1002B_RS02700	Cp1002B_RS06655	0.87
Cp1002B_RS03605	Cp1002B_RS01325	0.87
Cp1002B_RS02700	Cp1002B_RS09555	0.87
Cp1002B_RS02920	Cp1002B_RS03275	0.87
Cp1002B_RS02700	Cp1002B_RS07820	0.87
Cp1002B_RS03685	Cp1002B_RS06070	0.87
Cp1002B_RS03590	Cp1002B_RS03240	0.87
Cp1002B_RS03685	Cp1002B_RS06750	0.87
Cp1002B_RS03350	Cp1002B_RS07800	0.87
Cp1002B_RS03685	Cp1002B_RS06950	0.87
Cp1002B_RS02700	Cp1002B_RS09780	0.87
Cp1002B_RS02880	Cp1002B_RS08575	0.87
Cp1002B_RS03685	Cp1002B_RS07255	0.87
Cp1002B_RS02700	Cp1002B_RS07750	0.87
Cp1002B_RS02700	Cp1002B_RS05190	0.87
Cp1002B_RS01480	Cp1002B_RS09585	0.87
Cp1002B_RS03155	Cp1002B_RS07170	0.87
Cp1002B_RS03275	Cp1002B_RS05275	0.87
Cp1002B_RS02700	Cp1002B_RS10865	0.87
Cp1002B_RS03155	Cp1002B_RS07115	0.87
Cp1002B_RS04045	Cp1002B_RS01480	0.87
Cp1002B_RS03685	Cp1002B_RS07820	0.87
Cp1002B_RS03685	Cp1002B_RS04385	0.87
Cp1002B_RS03205	Cp1002B_RS05165	0.87
Cp1002B_RS02700	Cp1002B_RS07380	0.87
Cp1002B_RS03825	Cp1002B_RS00295	0.87
Cp1002B_RS03770	Cp1002B_RS02695	0.87
Cp1002B_RS04250	Cp1002B_RS07620	0.87
Cp1002B_RS02920	Cp1002B_RS10500	0.87
Cp1002B_RS04250	Cp1002B_RS08765	0.87
Cp1002B_RS03675	Cp1002B_RS02600	0.87
Cp1002B_RS03825	Cp1002B_RS00170	0.87
Cp1002B_RS03350	Cp1002B_RS06645	0.87
Cp1002B_RS02700	Cp1002B_RS05970	0.87
Cp1002B_RS03915	Cp1002B_RS09320	0.87
Cp1002B_RS00730	Cp1002B_RS10160	0.87
Cp1002B_RS03470	Cp1002B_RS08150	0.87
Cp1002B_RS02945	Cp1002B_RS02060	0.87
Cp1002B_RS00730	Cp1002B_RS00885	0.87
Cp1002B_RS02945	Cp1002B_RS02235	0.87
Cp1002B_RS03825	Cp1002B_RS01875	0.87
Cp1002B_RS03205	Cp1002B_RS06430	0.87
Cp1002B_RS02700	Cp1002B_RS08105	0.87
Cp1002B_RS02945	Cp1002B_RS02725	0.87
Cp1002B_RS03915	Cp1002B_RS09425	0.87
Cp1002B_RS02700	Cp1002B_RS06035	0.87
Cp1002B_RS03685	Cp1002B_RS04015	0.87
Cp1002B_RS03770	Cp1002B_RS01415	0.87
Cp1002B_RS03770	Cp1002B_RS01520	0.87
Cp1002B_RS03570	Cp1002B_RS08425	0.87
Cp1002B_RS03685	Cp1002B_RS04000	0.87
Cp1002B_RS03685	Cp1002B_RS04100	0.87
Cp1002B_RS02930	Cp1002B_RS04470	0.87
Cp1002B_RS02730	Cp1002B_RS04480	0.869
Cp1002B_RS03075	Cp1002B_RS05305	0.869
Cp1002B_RS03275	Cp1002B_RS05515	0.869
Cp1002B_RS02700	Cp1002B_RS09395	0.869
Cp1002B_RS02755	Cp1002B_RS00490	0.869
Cp1002B_RS02705	Cp1002B_RS01390	0.869
Cp1002B_RS03275	Cp1002B_RS04220	0.869
Cp1002B_RS03915	Cp1002B_RS07250	0.869
Cp1002B_RS02700	Cp1002B_RS09885	0.869
Cp1002B_RS02700	Cp1002B_RS07255	0.869
Cp1002B_RS02710	Cp1002B_RS07475	0.869
Cp1002B_RS03915	Cp1002B_RS07670	0.869
Cp1002B_RS03570	Cp1002B_RS09750	0.869
Cp1002B_RS04725	Cp1002B_RS04495	0.869
Cp1002B_RS02755	Cp1002B_RS03205	0.869
Cp1002B_RS02755	Cp1002B_RS00360	0.869
Cp1002B_RS03995	Cp1002B_RS01810	0.869
Cp1002B_RS03275	Cp1002B_RS05140	0.869
Cp1002B_RS02700	Cp1002B_RS08780	0.869
Cp1002B_RS04495	Cp1002B_RS07895	0.869
Cp1002B_RS03570	Cp1002B_RS06450	0.869
Cp1002B_RS02700	Cp1002B_RS09305	0.869
Cp1002B_RS02745	Cp1002B_RS09845	0.869
Cp1002B_RS02755	Cp1002B_RS02985	0.869
Cp1002B_RS02705	Cp1002B_RS00965	0.869
Cp1002B_RS03915	Cp1002B_RS07840	0.869
Cp1002B_RS02705	Cp1002B_RS00720	0.869
Cp1002B_RS02700	Cp1002B_RS08795	0.869
Cp1002B_RS04495	Cp1002B_RS10125	0.869
Cp1002B_RS03825	Cp1002B_RS02630	0.869
Cp1002B_RS02755	Cp1002B_RS05370	0.869
Cp1002B_RS03685	Cp1002B_RS05270	0.869
Cp1002B_RS03350	Cp1002B_RS08160	0.869
Cp1002B_RS01050	Cp1002B_RS00325	0.869
Cp1002B_RS02920	Cp1002B_RS05915	0.869
Cp1002B_RS03685	Cp1002B_RS06040	0.869
Cp1002B_RS03685	Cp1002B_RS06085	0.869
Cp1002B_RS03350	Cp1002B_RS07750	0.869
Cp1002B_RS05300	Cp1002B_RS00730	0.869
Cp1002B_RS02830	Cp1002B_RS04075	0.869
Cp1002B_RS03350	Cp1002B_RS07490	0.869
Cp1002B_RS03685	Cp1002B_RS08035	0.869
Cp1002B_RS03685	Cp1002B_RS08170	0.869
Cp1002B_RS03685	Cp1002B_RS08605	0.869
Cp1002B_RS03685	Cp1002B_RS08825	0.869
Cp1002B_RS03685	Cp1002B_RS09935	0.869
Cp1002B_RS02755	Cp1002B_RS05395	0.869
Cp1002B_RS04250	Cp1002B_RS08105	0.869
Cp1002B_RS03455	Cp1002B_RS04785	0.869
Cp1002B_RS03715	Cp1002B_RS08460	0.869
Cp1002B_RS03770	Cp1002B_RS00445	0.869
Cp1002B_RS03455	Cp1002B_RS04990	0.869
Cp1002B_RS03770	Cp1002B_RS02555	0.869
Cp1002B_RS03770	Cp1002B_RS03640	0.869
Cp1002B_RS03770	Cp1002B_RS06615	0.869
Cp1002B_RS03605	Cp1002B_RS00085	0.869
Cp1002B_RS03605	Cp1002B_RS00695	0.869
Cp1002B_RS03825	Cp1002B_RS01705	0.869
Cp1002B_RS03450	Cp1002B_RS02695	0.869
Cp1002B_RS03470	Cp1002B_RS06220	0.869
Cp1002B_RS03350	Cp1002B_RS09885	0.869
Cp1002B_RS02700	Cp1002B_RS04460	0.869
Cp1002B_RS04250	Cp1002B_RS09270	0.869
Cp1002B_RS03050	Cp1002B_RS05595	0.869
Cp1002B_RS04250	Cp1002B_RS10075	0.869
Cp1002B_RS03350	Cp1002B_RS09395	0.869
Cp1002B_RS03470	Cp1002B_RS07105	0.869
Cp1002B_RS03400	Cp1002B_RS05755	0.869
Cp1002B_RS03400	Cp1002B_RS10700	0.869
Cp1002B_RS02945	Cp1002B_RS09800	0.869
Cp1002B_RS03650	Cp1002B_RS02180	0.869
Cp1002B_RS02945	Cp1002B_RS06860	0.869
Cp1002B_RS02700	Cp1002B_RS03590	0.869
Cp1002B_RS03350	Cp1002B_RS08880	0.869
Cp1002B_RS03605	Cp1002B_RS02480	0.869
Cp1002B_RS03675	Cp1002B_RS00150	0.869
Cp1002B_RS02945	Cp1002B_RS01450	0.869
Cp1002B_RS03675	Cp1002B_RS03410	0.869
Cp1002B_RS04250	Cp1002B_RS08720	0.869
Cp1002B_RS00770	Cp1002B_RS02080	0.869
Cp1002B_RS03685	Cp1002B_RS04515	0.869
Cp1002B_RS05300	Cp1002B_RS02290	0.869
Cp1002B_RS04250	Cp1002B_RS07600	0.869
Cp1002B_RS03590	Cp1002B_RS02455	0.869
Cp1002B_RS02755	Cp1002B_RS06645	0.869
Cp1002B_RS04475	Cp1002B_RS09855	0.869
Cp1002B_RS04250	Cp1002B_RS06985	0.869
Cp1002B_RS02755	Cp1002B_RS07420	0.869
Cp1002B_RS04895	Cp1002B_RS01875	0.869
Cp1002B_RS02755	Cp1002B_RS05970	0.869
Cp1002B_RS03915	Cp1002B_RS04905	0.869
Cp1002B_RS02755	Cp1002B_RS07285	0.869
Cp1002B_RS03350	Cp1002B_RS05040	0.869
Cp1002B_RS03915	Cp1002B_RS05130	0.869
Cp1002B_RS03915	Cp1002B_RS06665	0.869
Cp1002B_RS03825	Cp1002B_RS02035	0.869
Cp1002B_RS02755	Cp1002B_RS05885	0.869
Cp1002B_RS02755	Cp1002B_RS08150	0.869
Cp1002B_RS02755	Cp1002B_RS08255	0.869
Cp1002B_RS02755	Cp1002B_RS05630	0.869
Cp1002B_RS03915	Cp1002B_RS03560	0.869
Cp1002B_RS02755	Cp1002B_RS06130	0.869
Cp1002B_RS02755	Cp1002B_RS09555	0.869
Cp1002B_RS03350	Cp1002B_RS05580	0.869
Cp1002B_RS03205	Cp1002B_RS06545	0.869
Cp1002B_RS04895	Cp1002B_RS00170	0.869
Cp1002B_RS03825	Cp1002B_RS02705	0.869
Cp1002B_RS02755	Cp1002B_RS06345	0.869
Cp1002B_RS02755	Cp1002B_RS10410	0.869
Cp1002B_RS04475	Cp1002B_RS09495	0.869
Cp1002B_RS03915	Cp1002B_RS05165	0.869
Cp1002B_RS03205	Cp1002B_RS06990	0.869
Cp1002B_RS03350	Cp1002B_RS06185	0.869
Cp1002B_RS03405	Cp1002B_RS02950	0.869
Cp1002B_RS02700	Cp1002B_RS06185	0.869
Cp1002B_RS03405	Cp1002B_RS02680	0.869
Cp1002B_RS02700	Cp1002B_RS06590	0.868
Cp1002B_RS03470	Cp1002B_RS07670	0.868
Cp1002B_RS03470	Cp1002B_RS08130	0.868
Cp1002B_RS03350	Cp1002B_RS06595	0.868
Cp1002B_RS02700	Cp1002B_RS06920	0.868
Cp1002B_RS04250	Cp1002B_RS01875	0.868
Cp1002B_RS02700	Cp1002B_RS08170	0.868
Cp1002B_RS02700	Cp1002B_RS06760	0.868
Cp1002B_RS03570	Cp1002B_RS04215	0.868
Cp1002B_RS02700	Cp1002B_RS06680	0.868
Cp1002B_RS02700	Cp1002B_RS03885	0.868
Cp1002B_RS02700	Cp1002B_RS06635	0.868
Cp1002B_RS04250	Cp1002B_RS09320	0.868
Cp1002B_RS03470	Cp1002B_RS06550	0.868
Cp1002B_RS04250	Cp1002B_RS09580	0.868
Cp1002B_RS03470	Cp1002B_RS06255	0.868
Cp1002B_RS03350	Cp1002B_RS04515	0.868
Cp1002B_RS02700	Cp1002B_RS08430	0.868
Cp1002B_RS03470	Cp1002B_RS06130	0.868
Cp1002B_RS03350	Cp1002B_RS09425	0.868
Cp1002B_RS04015	Cp1002B_RS03590	0.868
Cp1002B_RS02700	Cp1002B_RS07080	0.868
Cp1002B_RS03570	Cp1002B_RS04180	0.868
Cp1002B_RS03485	Cp1002B_RS08425	0.868
Cp1002B_RS02700	Cp1002B_RS08560	0.868
Cp1002B_RS04250	Cp1002B_RS07735	0.868
Cp1002B_RS02700	Cp1002B_RS07600	0.868
Cp1002B_RS02700	Cp1002B_RS05890	0.868
Cp1002B_RS03510	Cp1002B_RS04760	0.868
Cp1002B_RS02515	Cp1002B_RS09930	0.868
Cp1002B_RS02700	Cp1002B_RS06325	0.868
Cp1002B_RS04230	Cp1002B_RS00650	0.868
Cp1002B_RS03470	Cp1002B_RS10785	0.868
Cp1002B_RS01480	Cp1002B_RS10500	0.868
Cp1002B_RS02700	Cp1002B_RS07235	0.868
Cp1002B_RS03470	Cp1002B_RS10410	0.868
Cp1002B_RS04250	Cp1002B_RS07070	0.868
Cp1002B_RS03405	Cp1002B_RS00580	0.868
Cp1002B_RS03405	Cp1002B_RS00535	0.868
Cp1002B_RS02700	Cp1002B_RS05380	0.868
Cp1002B_RS03470	Cp1002B_RS09520	0.868
Cp1002B_RS03470	Cp1002B_RS09205	0.868
Cp1002B_RS04230	Cp1002B_RS08570	0.868
Cp1002B_RS03470	Cp1002B_RS08825	0.868
Cp1002B_RS02700	Cp1002B_RS05130	0.868
Cp1002B_RS04250	Cp1002B_RS08605	0.868
Cp1002B_RS02700	Cp1002B_RS07920	0.868
Cp1002B_RS04250	Cp1002B_RS03770	0.868
Cp1002B_RS02700	Cp1002B_RS06510	0.868
Cp1002B_RS04250	Cp1002B_RS08625	0.868
Cp1002B_RS02700	Cp1002B_RS08480	0.868
Cp1002B_RS03645	Cp1002B_RS08740	0.868
Cp1002B_RS02700	Cp1002B_RS08585	0.868
Cp1002B_RS03825	Cp1002B_RS01210	0.868
Cp1002B_RS03590	Cp1002B_RS01815	0.868
Cp1002B_RS02755	Cp1002B_RS08900	0.868
Cp1002B_RS02755	Cp1002B_RS09405	0.868
Cp1002B_RS02755	Cp1002B_RS09510	0.868
Cp1002B_RS03825	Cp1002B_RS03090	0.868
Cp1002B_RS03405	Cp1002B_RS03240	0.868
Cp1002B_RS03825	Cp1002B_RS01185	0.868
Cp1002B_RS01480	Cp1002B_RS06685	0.868
Cp1002B_RS02760	Cp1002B_RS01880	0.868
Cp1002B_RS05100	Cp1002B_RS01810	0.868
Cp1002B_RS03770	Cp1002B_RS03450	0.868
Cp1002B_RS03205	Cp1002B_RS05480	0.868
Cp1002B_RS03685	Cp1002B_RS09580	0.868
Cp1002B_RS03685	Cp1002B_RS08625	0.868
Cp1002B_RS03205	Cp1002B_RS07415	0.868
Cp1002B_RS03470	Cp1002B_RS04415	0.868
Cp1002B_RS02755	Cp1002B_RS08160	0.868
Cp1002B_RS04895	Cp1002B_RS02630	0.868
Cp1002B_RS02755	Cp1002B_RS07640	0.868
Cp1002B_RS02755	Cp1002B_RS07255	0.868
Cp1002B_RS03205	Cp1002B_RS08250	0.868
Cp1002B_RS02755	Cp1002B_RS07180	0.868
Cp1002B_RS02755	Cp1002B_RS06945	0.868
Cp1002B_RS04895	Cp1002B_RS01655	0.868
Cp1002B_RS03915	Cp1002B_RS05900	0.868
Cp1002B_RS03915	Cp1002B_RS05965	0.868
Cp1002B_RS04895	Cp1002B_RS01210	0.868
Cp1002B_RS03205	Cp1002B_RS08660	0.868
Cp1002B_RS02755	Cp1002B_RS06045	0.868
Cp1002B_RS02755	Cp1002B_RS06025	0.868
Cp1002B_RS03915	Cp1002B_RS06915	0.868
Cp1002B_RS03685	Cp1002B_RS08280	0.868
Cp1002B_RS03205	Cp1002B_RS04175	0.868
Cp1002B_RS03685	Cp1002B_RS07325	0.868
Cp1002B_RS02945	Cp1002B_RS09215	0.868
Cp1002B_RS03645	Cp1002B_RS07615	0.868
Cp1002B_RS03645	Cp1002B_RS07560	0.868
Cp1002B_RS03645	Cp1002B_RS06665	0.868
Cp1002B_RS03055	Cp1002B_RS03075	0.868
Cp1002B_RS03645	Cp1002B_RS06550	0.868
Cp1002B_RS03450	Cp1002B_RS00585	0.868
Cp1002B_RS03050	Cp1002B_RS10150	0.868
Cp1002B_RS03640	Cp1002B_RS02070	0.868
Cp1002B_RS03650	Cp1002B_RS00490	0.868
Cp1002B_RS03450	Cp1002B_RS01330	0.868
Cp1002B_RS03045	Cp1002B_RS01990	0.868
Cp1002B_RS03035	Cp1002B_RS10700	0.868
Cp1002B_RS03035	Cp1002B_RS05755	0.868
Cp1002B_RS02995	Cp1002B_RS06280	0.868
Cp1002B_RS03650	Cp1002B_RS02110	0.868
Cp1002B_RS01050	Cp1002B_RS09875	0.868
Cp1002B_RS03655	Cp1002B_RS01480	0.868
Cp1002B_RS02945	Cp1002B_RS01160	0.868
Cp1002B_RS02945	Cp1002B_RS00150	0.868
Cp1002B_RS02920	Cp1002B_RS08665	0.868
Cp1002B_RS03605	Cp1002B_RS00590	0.868
Cp1002B_RS02920	Cp1002B_RS08010	0.868
Cp1002B_RS03685	Cp1002B_RS05375	0.868
Cp1002B_RS03605	Cp1002B_RS00065	0.868
Cp1002B_RS03450	Cp1002B_RS03235	0.868
Cp1002B_RS02920	Cp1002B_RS01695	0.868
Cp1002B_RS03205	Cp1002B_RS03800	0.868
Cp1002B_RS03450	Cp1002B_RS03350	0.868
Cp1002B_RS03685	Cp1002B_RS06985	0.868
Cp1002B_RS03685	Cp1002B_RS07070	0.868
Cp1002B_RS02755	Cp1002B_RS05280	0.868
Cp1002B_RS03455	Cp1002B_RS10125	0.868
Cp1002B_RS02705	Cp1002B_RS01905	0.868
Cp1002B_RS04495	Cp1002B_RS08410	0.868
Cp1002B_RS03275	Cp1002B_RS07190	0.868
Cp1002B_RS02700	Cp1002B_RS08880	0.868
Cp1002B_RS02755	Cp1002B_RS04385	0.868
Cp1002B_RS03590	Cp1002B_RS00605	0.868
Cp1002B_RS03470	Cp1002B_RS04695	0.868
Cp1002B_RS02705	Cp1002B_RS00580	0.868
Cp1002B_RS03980	Cp1002B_RS10720	0.868
Cp1002B_RS02700	Cp1002B_RS08815	0.868
Cp1002B_RS01480	Cp1002B_RS08425	0.868
Cp1002B_RS03275	Cp1002B_RS06740	0.868
Cp1002B_RS03205	Cp1002B_RS09895	0.868
Cp1002B_RS03275	Cp1002B_RS05045	0.868
Cp1002B_RS02755	Cp1002B_RS04695	0.868
Cp1002B_RS03275	Cp1002B_RS07965	0.868
Cp1002B_RS02700	Cp1002B_RS10075	0.868
Cp1002B_RS02700	Cp1002B_RS08600	0.868
Cp1002B_RS02755	Cp1002B_RS03915	0.868
Cp1002B_RS04495	Cp1002B_RS09655	0.868
Cp1002B_RS02755	Cp1002B_RS04895	0.868
Cp1002B_RS03685	Cp1002B_RS05040	0.867
Cp1002B_RS03405	Cp1002B_RS01865	0.867
Cp1002B_RS05300	Cp1002B_RS00885	0.867
Cp1002B_RS03605	Cp1002B_RS00535	0.867
Cp1002B_RS04300	Cp1002B_RS08245	0.867
Cp1002B_RS03685	Cp1002B_RS05560	0.867
Cp1002B_RS02700	Cp1002B_RS05070	0.867
Cp1002B_RS02700	Cp1002B_RS05165	0.867
Cp1002B_RS02880	Cp1002B_RS05595	0.867
Cp1002B_RS04495	Cp1002B_RS09770	0.867
Cp1002B_RS03685	Cp1002B_RS05580	0.867
Cp1002B_RS01050	Cp1002B_RS00865	0.867
Cp1002B_RS04475	Cp1002B_RS04725	0.867
Cp1002B_RS03470	Cp1002B_RS10755	0.867
Cp1002B_RS02820	Cp1002B_RS04470	0.867
Cp1002B_RS02700	Cp1002B_RS07325	0.867
Cp1002B_RS02705	Cp1002B_RS02455	0.867
Cp1002B_RS04495	Cp1002B_RS05665	0.867
Cp1002B_RS02755	Cp1002B_RS05355	0.867
Cp1002B_RS02700	Cp1002B_RS05375	0.867
Cp1002B_RS03470	Cp1002B_RS09555	0.867
Cp1002B_RS03275	Cp1002B_RS10275	0.867
Cp1002B_RS03685	Cp1002B_RS06655	0.867
Cp1002B_RS03205	Cp1002B_RS03640	0.867
Cp1002B_RS03685	Cp1002B_RS06545	0.867
Cp1002B_RS02920	Cp1002B_RS03565	0.867
Cp1002B_RS03470	Cp1002B_RS08395	0.867
Cp1002B_RS03350	Cp1002B_RS08105	0.867
Cp1002B_RS03470	Cp1002B_RS08900	0.867
Cp1002B_RS00770	Cp1002B_RS06055	0.867
Cp1002B_RS02945	Cp1002B_RS06560	0.867
[truncated: 3,681 more rows]

## Sheet: CP-T1_network
Gene1	Gene2	Value
CpCpT1_RS02160	CpCpT1_RS06140	0.994
CpCpT1_RS02160	CpCpT1_RS01385	0.994
CpCpT1_RS08655	CpCpT1_RS08805	0.993
CpCpT1_RS03585	CpCpT1_RS07520	0.993
CpCpT1_RS10225	CpCpT1_RS01655	0.992
CpCpT1_RS02205	CpCpT1_RS08025	0.992
CpCpT1_RS05190	CpCpT1_RS02845	0.992
CpCpT1_RS00965	CpCpT1_RS00555	0.992
CpCpT1_RS02425	CpCpT1_RS06960	0.991
CpCpT1_RS10225	CpCpT1_RS08580	0.991
CpCpT1_RS06685	CpCpT1_RS01840	0.991
CpCpT1_RS03000	CpCpT1_RS01600	0.991
CpCpT1_RS03405	CpCpT1_RS09120	0.99
CpCpT1_RS07170	CpCpT1_RS09600	0.99
CpCpT1_RS09075	CpCpT1_RS02750	0.99
CpCpT1_RS09765	CpCpT1_RS06130	0.99
CpCpT1_RS03000	CpCpT1_RS02375	0.99
CpCpT1_RS07170	CpCpT1_RS09665	0.989
CpCpT1_RS03510	CpCpT1_RS03245	0.989
CpCpT1_RS01505	CpCpT1_RS06670	0.989
CpCpT1_RS03000	CpCpT1_RS08095	0.989
CpCpT1_RS06640	CpCpT1_RS00590	0.989
CpCpT1_RS10225	CpCpT1_RS06845	0.989
CpCpT1_RS03000	CpCpT1_RS10090	0.989
CpCpT1_RS03585	CpCpT1_RS08165	0.989
CpCpT1_RS02425	CpCpT1_RS05565	0.988
CpCpT1_RS03000	CpCpT1_RS00300	0.988
CpCpT1_RS03225	CpCpT1_RS03220	0.988
CpCpT1_RS03000	CpCpT1_RS00765	0.988
CpCpT1_RS03585	CpCpT1_RS01855	0.988
CpCpT1_RS00965	CpCpT1_RS00080	0.988
CpCpT1_RS03510	CpCpT1_RS09685	0.988
CpCpT1_RS10225	CpCpT1_RS07370	0.988
CpCpT1_RS05190	CpCpT1_RS06375	0.988
CpCpT1_RS03605	CpCpT1_RS08380	0.988
CpCpT1_RS09765	CpCpT1_RS05765	0.988
CpCpT1_RS03450	CpCpT1_RS05385	0.987
CpCpT1_RS01505	CpCpT1_RS03890	0.987
CpCpT1_RS09765	CpCpT1_RS00010	0.987
CpCpT1_RS03585	CpCpT1_RS03330	0.987
CpCpT1_RS06470	CpCpT1_RS05055	0.987
CpCpT1_RS03920	CpCpT1_RS09720	0.987
CpCpT1_RS03000	CpCpT1_RS07765	0.987
CpCpT1_RS09075	CpCpT1_RS08155	0.987
CpCpT1_RS09075	CpCpT1_RS05200	0.987
CpCpT1_RS02425	CpCpT1_RS10800	0.987
CpCpT1_RS02425	CpCpT1_RS08710	0.987
CpCpT1_RS07860	CpCpT1_RS09960	0.986
CpCpT1_RS01300	CpCpT1_RS09190	0.986
CpCpT1_RS05190	CpCpT1_RS08595	0.986
CpCpT1_RS02425	CpCpT1_RS06220	0.986
CpCpT1_RS03690	CpCpT1_RS01385	0.986
CpCpT1_RS03490	CpCpT1_RS01710	0.986
CpCpT1_RS06685	CpCpT1_RS05465	0.986
CpCpT1_RS05190	CpCpT1_RS03120	0.986
CpCpT1_RS06685	CpCpT1_RS01175	0.985
CpCpT1_RS02425	CpCpT1_RS01890	0.985
CpCpT1_RS05190	CpCpT1_RS03845	0.985
CpCpT1_RS05190	CpCpT1_RS03990	0.985
CpCpT1_RS05190	CpCpT1_RS09020	0.985
CpCpT1_RS03690	CpCpT1_RS01665	0.985
CpCpT1_RS03690	CpCpT1_RS00455	0.985
CpCpT1_RS03000	CpCpT1_RS01115	0.985
CpCpT1_RS03000	CpCpT1_RS05385	0.985
CpCpT1_RS07860	CpCpT1_RS08225	0.985
CpCpT1_RS03225	CpCpT1_RS03865	0.985
CpCpT1_RS01030	CpCpT1_RS02130	0.985
CpCpT1_RS04725	CpCpT1_RS03870	0.985
CpCpT1_RS03510	CpCpT1_RS08945	0.984
CpCpT1_RS06470	CpCpT1_RS00470	0.984
CpCpT1_RS01505	CpCpT1_RS01890	0.984
CpCpT1_RS07740	CpCpT1_RS09930	0.984
CpCpT1_RS07170	CpCpT1_RS06975	0.984
CpCpT1_RS07170	CpCpT1_RS08700	0.984
CpCpT1_RS07170	CpCpT1_RS01320	0.984
CpCpT1_RS02425	CpCpT1_RS04215	0.984
CpCpT1_RS03510	CpCpT1_RS06655	0.984
CpCpT1_RS03585	CpCpT1_RS03270	0.984
CpCpT1_RS03510	CpCpT1_RS01050	0.984
CpCpT1_RS09275	CpCpT1_RS06695	0.984
CpCpT1_RS01985	CpCpT1_RS07855	0.984
CpCpT1_RS06685	CpCpT1_RS09340	0.984
CpCpT1_RS03225	CpCpT1_RS10080	0.984
CpCpT1_RS03380	CpCpT1_RS08200	0.984
CpCpT1_RS09505	CpCpT1_RS05055	0.984
CpCpT1_RS07155	CpCpT1_RS01670	0.984
CpCpT1_RS06685	CpCpT1_RS05895	0.984
CpCpT1_RS08880	CpCpT1_RS04375	0.984
CpCpT1_RS03000	CpCpT1_RS02295	0.984
CpCpT1_RS06685	CpCpT1_RS10740	0.984
CpCpT1_RS10225	CpCpT1_RS07870	0.984
CpCpT1_RS03490	CpCpT1_RS00625	0.983
CpCpT1_RS07860	CpCpT1_RS09795	0.983
CpCpT1_RS09505	CpCpT1_RS02850	0.983
CpCpT1_RS00965	CpCpT1_RS03140	0.983
CpCpT1_RS08015	CpCpT1_RS08695	0.983
CpCpT1_RS08015	CpCpT1_RS06870	0.983
CpCpT1_RS03490	CpCpT1_RS02525	0.983
CpCpT1_RS05065	CpCpT1_RS05725	0.983
CpCpT1_RS03450	CpCpT1_RS09445	0.983
CpCpT1_RS06685	CpCpT1_RS04000	0.983
CpCpT1_RS10390	CpCpT1_RS01035	0.983
CpCpT1_RS03000	CpCpT1_RS01665	0.983
CpCpT1_RS02660	CpCpT1_RS10720	0.983
CpCpT1_RS01505	CpCpT1_RS04640	0.983
CpCpT1_RS09995	CpCpT1_RS07475	0.983
CpCpT1_RS03000	CpCpT1_RS01605	0.983
CpCpT1_RS10225	CpCpT1_RS00245	0.983
CpCpT1_RS01505	CpCpT1_RS00535	0.982
CpCpT1_RS10225	CpCpT1_RS09870	0.982
CpCpT1_RS10390	CpCpT1_RS09385	0.982
CpCpT1_RS10225	CpCpT1_RS00930	0.982
CpCpT1_RS02295	CpCpT1_RS01075	0.982
CpCpT1_RS01505	CpCpT1_RS08710	0.982
CpCpT1_RS07155	CpCpT1_RS10695	0.982
CpCpT1_RS02295	CpCpT1_RS07090	0.982
CpCpT1_RS03235	CpCpT1_RS02355	0.982
CpCpT1_RS03000	CpCpT1_RS06420	0.982
CpCpT1_RS05550	CpCpT1_RS06820	0.982
CpCpT1_RS10175	CpCpT1_RS01875	0.982
CpCpT1_RS03510	CpCpT1_RS08885	0.982
CpCpT1_RS03000	CpCpT1_RS07210	0.982
CpCpT1_RS09730	CpCpT1_RS06455	0.982
CpCpT1_RS09505	CpCpT1_RS00900	0.982
CpCpT1_RS02175	CpCpT1_RS09930	0.982
CpCpT1_RS03660	CpCpT1_RS07100	0.982
CpCpT1_RS10150	CpCpT1_RS03010	0.982
CpCpT1_RS02295	CpCpT1_RS07075	0.982
CpCpT1_RS06470	CpCpT1_RS08810	0.982
CpCpT1_RS02520	CpCpT1_RS09020	0.982
CpCpT1_RS03690	CpCpT1_RS08555	0.982
CpCpT1_RS06685	CpCpT1_RS10530	0.982
CpCpT1_RS06685	CpCpT1_RS04930	0.982
CpCpT1_RS02425	CpCpT1_RS06235	0.982
CpCpT1_RS02295	CpCpT1_RS00350	0.981
CpCpT1_RS08015	CpCpT1_RS09820	0.981
CpCpT1_RS07985	CpCpT1_RS04040	0.981
CpCpT1_RS10390	CpCpT1_RS09380	0.981
CpCpT1_RS07155	CpCpT1_RS06090	0.981
CpCpT1_RS02295	CpCpT1_RS10255	0.981
CpCpT1_RS05550	CpCpT1_RS04635	0.981
CpCpT1_RS05550	CpCpT1_RS09580	0.981
CpCpT1_RS02295	CpCpT1_RS02910	0.981
CpCpT1_RS00965	CpCpT1_RS09450	0.981
CpCpT1_RS02160	CpCpT1_RS02920	0.981
CpCpT1_RS07865	CpCpT1_RS09340	0.981
CpCpT1_RS05550	CpCpT1_RS06390	0.981
CpCpT1_RS02190	CpCpT1_RS02455	0.981
CpCpT1_RS02425	CpCpT1_RS06625	0.981
CpCpT1_RS02295	CpCpT1_RS07100	0.981
CpCpT1_RS01985	CpCpT1_RS07715	0.981
CpCpT1_RS03510	CpCpT1_RS06205	0.981
CpCpT1_RS09765	CpCpT1_RS07330	0.981
CpCpT1_RS05190	CpCpT1_RS02745	0.981
CpCpT1_RS03490	CpCpT1_RS06525	0.98
CpCpT1_RS02205	CpCpT1_RS10550	0.98
CpCpT1_RS02815	CpCpT1_RS10535	0.98
CpCpT1_RS05065	CpCpT1_RS09375	0.98
CpCpT1_RS02160	CpCpT1_RS03690	0.98
CpCpT1_RS04725	CpCpT1_RS06390	0.98
CpCpT1_RS07170	CpCpT1_RS06910	0.98
CpCpT1_RS03225	CpCpT1_RS06835	0.98
CpCpT1_RS03405	CpCpT1_RS02730	0.98
CpCpT1_RS06685	CpCpT1_RS04865	0.98
CpCpT1_RS03510	CpCpT1_RS06635	0.98
CpCpT1_RS09165	CpCpT1_RS04570	0.98
CpCpT1_RS03510	CpCpT1_RS00050	0.98
CpCpT1_RS04050	CpCpT1_RS08260	0.98
CpCpT1_RS10180	CpCpT1_RS00630	0.98
CpCpT1_RS00965	CpCpT1_RS07115	0.98
CpCpT1_RS08885	CpCpT1_RS03290	0.98
CpCpT1_RS03450	CpCpT1_RS07400	0.98
CpCpT1_RS08720	CpCpT1_RS03760	0.98
CpCpT1_RS05190	CpCpT1_RS05045	0.98
CpCpT1_RS01300	CpCpT1_RS10200	0.98
CpCpT1_RS10175	CpCpT1_RS09810	0.98
CpCpT1_RS09765	CpCpT1_RS00380	0.98
CpCpT1_RS02295	CpCpT1_RS03075	0.98
CpCpT1_RS02295	CpCpT1_RS03280	0.98
CpCpT1_RS02295	CpCpT1_RS05100	0.98
CpCpT1_RS01505	CpCpT1_RS07835	0.98
CpCpT1_RS03000	CpCpT1_RS01405	0.98
CpCpT1_RS09995	CpCpT1_RS05195	0.98
CpCpT1_RS03515	CpCpT1_RS06595	0.98
CpCpT1_RS02295	CpCpT1_RS03660	0.98
CpCpT1_RS02295	CpCpT1_RS01230	0.98
CpCpT1_RS06685	CpCpT1_RS03790	0.98
CpCpT1_RS07860	CpCpT1_RS04850	0.98
CpCpT1_RS10225	CpCpT1_RS06635	0.98
CpCpT1_RS07860	CpCpT1_RS08590	0.98
CpCpT1_RS09765	CpCpT1_RS08490	0.98
CpCpT1_RS08095	CpCpT1_RS10090	0.98
CpCpT1_RS01030	CpCpT1_RS01675	0.979
CpCpT1_RS07010	CpCpT1_RS02450	0.979
CpCpT1_RS02175	CpCpT1_RS10495	0.979
CpCpT1_RS03510	CpCpT1_RS05225	0.979
CpCpT1_RS06695	CpCpT1_RS02655	0.979
CpCpT1_RS08590	CpCpT1_RS03815	0.979
CpCpT1_RS00965	CpCpT1_RS02005	0.979
CpCpT1_RS06685	CpCpT1_RS09215	0.979
CpCpT1_RS10175	CpCpT1_RS10205	0.979
CpCpT1_RS03515	CpCpT1_RS08845	0.979
CpCpT1_RS09275	CpCpT1_RS02655	0.979
CpCpT1_RS04305	CpCpT1_RS06715	0.979
CpCpT1_RS03000	CpCpT1_RS10235	0.979
CpCpT1_RS03605	CpCpT1_RS04445	0.979
CpCpT1_RS02730	CpCpT1_RS01765	0.979
CpCpT1_RS03965	CpCpT1_RS06915	0.979
CpCpT1_RS08590	CpCpT1_RS07610	0.979
CpCpT1_RS03225	CpCpT1_RS01725	0.979
CpCpT1_RS08590	CpCpT1_RS02510	0.979
CpCpT1_RS02630	CpCpT1_RS09190	0.979
CpCpT1_RS02160	CpCpT1_RS03625	0.979
CpCpT1_RS02295	CpCpT1_RS02440	0.979
CpCpT1_RS07170	CpCpT1_RS03155	0.979
CpCpT1_RS10390	CpCpT1_RS01595	0.979
CpCpT1_RS06470	CpCpT1_RS09390	0.979
CpCpT1_RS07770	CpCpT1_RS09955	0.979
CpCpT1_RS10175	CpCpT1_RS01945	0.979
CpCpT1_RS01300	CpCpT1_RS01520	0.979
CpCpT1_RS10390	CpCpT1_RS03200	0.979
CpCpT1_RS10390	CpCpT1_RS08335	0.979
CpCpT1_RS02295	CpCpT1_RS01140	0.979
CpCpT1_RS06640	CpCpT1_RS04875	0.979
CpCpT1_RS02295	CpCpT1_RS02395	0.979
CpCpT1_RS01505	CpCpT1_RS06500	0.979
CpCpT1_RS03345	CpCpT1_RS06435	0.979
CpCpT1_RS01505	CpCpT1_RS10300	0.979
CpCpT1_RS02295	CpCpT1_RS03960	0.979
CpCpT1_RS05550	CpCpT1_RS01850	0.979
CpCpT1_RS05190	CpCpT1_RS08695	0.979
CpCpT1_RS05550	CpCpT1_RS05575	0.979
CpCpT1_RS03660	CpCpT1_RS07080	0.979
CpCpT1_RS07420	CpCpT1_RS09250	0.979
CpCpT1_RS06685	CpCpT1_RS06145	0.979
CpCpT1_RS08720	CpCpT1_RS00270	0.979
CpCpT1_RS00355	CpCpT1_RS08505	0.979
CpCpT1_RS06685	CpCpT1_RS01850	0.979
CpCpT1_RS05095	CpCpT1_RS08045	0.979
CpCpT1_RS06685	CpCpT1_RS04105	0.979
CpCpT1_RS02630	CpCpT1_RS10655	0.979
CpCpT1_RS05190	CpCpT1_RS00710	0.979
CpCpT1_RS07170	CpCpT1_RS02870	0.979
CpCpT1_RS07740	CpCpT1_RS10350	0.979
CpCpT1_RS07420	CpCpT1_RS04315	0.979
CpCpT1_RS08095	CpCpT1_RS01610	0.978
CpCpT1_RS08015	CpCpT1_RS01810	0.978
CpCpT1_RS03920	CpCpT1_RS01740	0.978
CpCpT1_RS03495	CpCpT1_RS00720	0.978
CpCpT1_RS03585	CpCpT1_RS05750	0.978
CpCpT1_RS03585	CpCpT1_RS01945	0.978
CpCpT1_RS08015	CpCpT1_RS02355	0.978
CpCpT1_RS03000	CpCpT1_RS06705	0.978
CpCpT1_RS02325	CpCpT1_RS06730	0.978
CpCpT1_RS00965	CpCpT1_RS10205	0.978
CpCpT1_RS02175	CpCpT1_RS00100	0.978
CpCpT1_RS09705	CpCpT1_RS09170	0.978
CpCpT1_RS10390	CpCpT1_RS06425	0.978
CpCpT1_RS10390	CpCpT1_RS09705	0.978
CpCpT1_RS09765	CpCpT1_RS03600	0.978
CpCpT1_RS02295	CpCpT1_RS01605	0.978
CpCpT1_RS03380	CpCpT1_RS04470	0.978
CpCpT1_RS10390	CpCpT1_RS07750	0.978
CpCpT1_RS10225	CpCpT1_RS03415	0.978
CpCpT1_RS10225	CpCpT1_RS02645	0.978
CpCpT1_RS05190	CpCpT1_RS01165	0.978
CpCpT1_RS03230	CpCpT1_RS07755	0.978
CpCpT1_RS10355	CpCpT1_RS05295	0.978
CpCpT1_RS03660	CpCpT1_RS06800	0.978
CpCpT1_RS07865	CpCpT1_RS05455	0.978
CpCpT1_RS05875	CpCpT1_RS02445	0.978
CpCpT1_RS07985	CpCpT1_RS03145	0.978
CpCpT1_RS07010	CpCpT1_RS10420	0.978
CpCpT1_RS01675	CpCpT1_RS06270	0.978
CpCpT1_RS06685	CpCpT1_RS03080	0.978
CpCpT1_RS01600	CpCpT1_RS10090	0.978
CpCpT1_RS06685	CpCpT1_RS08555	0.978
CpCpT1_RS06470	CpCpT1_RS08195	0.978
CpCpT1_RS06845	CpCpT1_RS10020	0.978
CpCpT1_RS00535	CpCpT1_RS08270	0.978
CpCpT1_RS03690	CpCpT1_RS10420	0.978
CpCpT1_RS01985	CpCpT1_RS09625	0.978
CpCpT1_RS08590	CpCpT1_RS09310	0.978
CpCpT1_RS03225	CpCpT1_RS08795	0.978
CpCpT1_RS03965	CpCpT1_RS02490	0.978
CpCpT1_RS00310	CpCpT1_RS06830	0.978
CpCpT1_RS02175	CpCpT1_RS05885	0.978
CpCpT1_RS10390	CpCpT1_RS08935	0.978
CpCpT1_RS08095	CpCpT1_RS01620	0.978
CpCpT1_RS06065	CpCpT1_RS05945	0.978
CpCpT1_RS01030	CpCpT1_RS07170	0.978
CpCpT1_RS03490	CpCpT1_RS02240	0.978
CpCpT1_RS03490	CpCpT1_RS06335	0.978
CpCpT1_RS02175	CpCpT1_RS03195	0.977
CpCpT1_RS08095	CpCpT1_RS06705	0.977
CpCpT1_RS03225	CpCpT1_RS02670	0.977
CpCpT1_RS06685	CpCpT1_RS00290	0.977
CpCpT1_RS07770	CpCpT1_RS03735	0.977
CpCpT1_RS03225	CpCpT1_RS07710	0.977
CpCpT1_RS02295	CpCpT1_RS07150	0.977
CpCpT1_RS03490	CpCpT1_RS08865	0.977
CpCpT1_RS08095	CpCpT1_RS01600	0.977
CpCpT1_RS01675	CpCpT1_RS06975	0.977
CpCpT1_RS03000	CpCpT1_RS00350	0.977
CpCpT1_RS02175	CpCpT1_RS01775	0.977
CpCpT1_RS03450	CpCpT1_RS00880	0.977
CpCpT1_RS09765	CpCpT1_RS06055	0.977
CpCpT1_RS09995	CpCpT1_RS04315	0.977
CpCpT1_RS03000	CpCpT1_RS10005	0.977
CpCpT1_RS05095	CpCpT1_RS08070	0.977
CpCpT1_RS10225	CpCpT1_RS05020	0.977
CpCpT1_RS10225	CpCpT1_RS00690	0.977
CpCpT1_RS01300	CpCpT1_RS04405	0.977
CpCpT1_RS10390	CpCpT1_RS03345	0.977
CpCpT1_RS06845	CpCpT1_RS09315	0.977
CpCpT1_RS02335	CpCpT1_RS02665	0.977
CpCpT1_RS06695	CpCpT1_RS00560	0.977
CpCpT1_RS02815	CpCpT1_RS04480	0.977
CpCpT1_RS05190	CpCpT1_RS04330	0.977
CpCpT1_RS09705	CpCpT1_RS09670	0.977
CpCpT1_RS10150	CpCpT1_RS10135	0.977
CpCpT1_RS01030	CpCpT1_RS09405	0.977
CpCpT1_RS00850	CpCpT1_RS07305	0.977
CpCpT1_RS06685	CpCpT1_RS09905	0.977
CpCpT1_RS04725	CpCpT1_RS08160	0.977
CpCpT1_RS07740	CpCpT1_RS06880	0.977
CpCpT1_RS02425	CpCpT1_RS07035	0.977
CpCpT1_RS01505	CpCpT1_RS03010	0.977
CpCpT1_RS02160	CpCpT1_RS10470	0.977
CpCpT1_RS07860	CpCpT1_RS07385	0.977
CpCpT1_RS00965	CpCpT1_RS00220	0.977
CpCpT1_RS08590	CpCpT1_RS03895	0.977
CpCpT1_RS03585	CpCpT1_RS10165	0.977
CpCpT1_RS02160	CpCpT1_RS07970	0.977
CpCpT1_RS02205	CpCpT1_RS09160	0.977
CpCpT1_RS02160	CpCpT1_RS03015	0.977
CpCpT1_RS07170	CpCpT1_RS03325	0.977
CpCpT1_RS04980	CpCpT1_RS02385	0.977
CpCpT1_RS02160	CpCpT1_RS04490	0.977
CpCpT1_RS01495	CpCpT1_RS00525	0.977
CpCpT1_RS09505	CpCpT1_RS01695	0.977
CpCpT1_RS02175	CpCpT1_RS06690	0.977
CpCpT1_RS00355	CpCpT1_RS02370	0.977
CpCpT1_RS03690	CpCpT1_RS10025	0.977
CpCpT1_RS05065	CpCpT1_RS06580	0.976
CpCpT1_RS01675	CpCpT1_RS02870	0.976
CpCpT1_RS06685	CpCpT1_RS07435	0.976
CpCpT1_RS09765	CpCpT1_RS05080	0.976
CpCpT1_RS09275	CpCpT1_RS00665	0.976
CpCpT1_RS03380	CpCpT1_RS09640	0.976
CpCpT1_RS09960	CpCpT1_RS05045	0.976
CpCpT1_RS05065	CpCpT1_RS04995	0.976
CpCpT1_RS03660	CpCpT1_RS09840	0.976
CpCpT1_RS02660	CpCpT1_RS02830	0.976
CpCpT1_RS07985	CpCpT1_RS02945	0.976
CpCpT1_RS03000	CpCpT1_RS06690	0.976
CpCpT1_RS02730	CpCpT1_RS00325	0.976
CpCpT1_RS07860	CpCpT1_RS05045	0.976
CpCpT1_RS03515	CpCpT1_RS08160	0.976
CpCpT1_RS01985	CpCpT1_RS09160	0.976
CpCpT1_RS08655	CpCpT1_RS09685	0.976
CpCpT1_RS08655	CpCpT1_RS10695	0.976
CpCpT1_RS03495	CpCpT1_RS09755	0.976
CpCpT1_RS02175	CpCpT1_RS07285	0.976
CpCpT1_RS10180	CpCpT1_RS05585	0.976
CpCpT1_RS03405	CpCpT1_RS01645	0.976
CpCpT1_RS00850	CpCpT1_RS01605	0.976
CpCpT1_RS08095	CpCpT1_RS00765	0.976
CpCpT1_RS10175	CpCpT1_RS08665	0.976
CpCpT1_RS03000	CpCpT1_RS01610	0.976
CpCpT1_RS05065	CpCpT1_RS06575	0.976
CpCpT1_RS05385	CpCpT1_RS06420	0.976
CpCpT1_RS03660	CpCpT1_RS01075	0.976
CpCpT1_RS01675	CpCpT1_RS00960	0.976
CpCpT1_RS09995	CpCpT1_RS09295	0.976
CpCpT1_RS02175	CpCpT1_RS01490	0.976
CpCpT1_RS02205	CpCpT1_RS04595	0.976
CpCpT1_RS03105	CpCpT1_RS07350	0.976
CpCpT1_RS07740	CpCpT1_RS09540	0.976
CpCpT1_RS07770	CpCpT1_RS02795	0.976
CpCpT1_RS10390	CpCpT1_RS07530	0.976
CpCpT1_RS08095	CpCpT1_RS00300	0.976
CpCpT1_RS10175	CpCpT1_RS01755	0.976
CpCpT1_RS10175	CpCpT1_RS01510	0.976
CpCpT1_RS05385	CpCpT1_RS00350	0.976
CpCpT1_RS06685	CpCpT1_RS07865	0.976
CpCpT1_RS01205	CpCpT1_RS09990	0.976
CpCpT1_RS07170	CpCpT1_RS04440	0.976
CpCpT1_RS09730	CpCpT1_RS08550	0.976
CpCpT1_RS03475	CpCpT1_RS10355	0.976
CpCpT1_RS03230	CpCpT1_RS02305	0.976
CpCpT1_RS04725	CpCpT1_RS05745	0.976
CpCpT1_RS05190	CpCpT1_RS09820	0.976
CpCpT1_RS02175	CpCpT1_RS02705	0.976
CpCpT1_RS02295	CpCpT1_RS01615	0.976
CpCpT1_RS09075	CpCpT1_RS06035	0.976
CpCpT1_RS03405	CpCpT1_RS02080	0.975
CpCpT1_RS05065	CpCpT1_RS05260	0.975
CpCpT1_RS03085	CpCpT1_RS06725	0.975
CpCpT1_RS08015	CpCpT1_RS06375	0.975
CpCpT1_RS08590	CpCpT1_RS01315	0.975
CpCpT1_RS07865	CpCpT1_RS05030	0.975
CpCpT1_RS09995	CpCpT1_RS01620	0.975
CpCpT1_RS09510	CpCpT1_RS10690	0.975
CpCpT1_RS05385	CpCpT1_RS01605	0.975
CpCpT1_RS09730	CpCpT1_RS07370	0.975
CpCpT1_RS08955	CpCpT1_RS10735	0.975
CpCpT1_RS03585	CpCpT1_RS01510	0.975
CpCpT1_RS10225	CpCpT1_RS06955	0.975
CpCpT1_RS02730	CpCpT1_RS10140	0.975
CpCpT1_RS00310	CpCpT1_RS10065	0.975
CpCpT1_RS10225	CpCpT1_RS00335	0.975
CpCpT1_RS10390	CpCpT1_RS05380	0.975
CpCpT1_RS07865	CpCpT1_RS05830	0.975
CpCpT1_RS03585	CpCpT1_RS05270	0.975
CpCpT1_RS10355	CpCpT1_RS03475	0.975
CpCpT1_RS03015	CpCpT1_RS10470	0.975
CpCpT1_RS03920	CpCpT1_RS04225	0.975
CpCpT1_RS03105	CpCpT1_RS05915	0.975
CpCpT1_RS01495	CpCpT1_RS08695	0.975
CpCpT1_RS03015	CpCpT1_RS06140	0.975
CpCpT1_RS05065	CpCpT1_RS05515	0.975
CpCpT1_RS05385	CpCpT1_RS02395	0.975
CpCpT1_RS10175	CpCpT1_RS00080	0.975
CpCpT1_RS09535	CpCpT1_RS09200	0.975
CpCpT1_RS03000	CpCpT1_RS03020	0.975
CpCpT1_RS10210	CpCpT1_RS05505	0.975
CpCpT1_RS06125	CpCpT1_RS08260	0.975
CpCpT1_RS09730	CpCpT1_RS03890	0.975
CpCpT1_RS01505	CpCpT1_RS10135	0.975
CpCpT1_RS09350	CpCpT1_RS02275	0.975
CpCpT1_RS03345	CpCpT1_RS08440	0.975
CpCpT1_RS08095	CpCpT1_RS01405	0.975
CpCpT1_RS01495	CpCpT1_RS06870	0.975
CpCpT1_RS09730	CpCpT1_RS03010	0.975
CpCpT1_RS00460	CpCpT1_RS05510	0.975
CpCpT1_RS08885	CpCpT1_RS03510	0.975
CpCpT1_RS07865	CpCpT1_RS06820	0.975
CpCpT1_RS09730	CpCpT1_RS10135	0.975
CpCpT1_RS05550	CpCpT1_RS02565	0.975
CpCpT1_RS10390	CpCpT1_RS01230	0.975
CpCpT1_RS00355	CpCpT1_RS05100	0.975
CpCpT1_RS01495	CpCpT1_RS02355	0.975
CpCpT1_RS05550	CpCpT1_RS09770	0.975
CpCpT1_RS04725	CpCpT1_RS03625	0.975
CpCpT1_RS01505	CpCpT1_RS01510	0.975
CpCpT1_RS03225	CpCpT1_RS05480	0.975
CpCpT1_RS06435	CpCpT1_RS00355	0.975
CpCpT1_RS00965	CpCpT1_RS06160	0.975
CpCpT1_RS00965	CpCpT1_RS09295	0.975
CpCpT1_RS05385	CpCpT1_RS01600	0.975
CpCpT1_RS10175	CpCpT1_RS08190	0.975
CpCpT1_RS00965	CpCpT1_RS06890	0.975
CpCpT1_RS06710	CpCpT1_RS02200	0.975
CpCpT1_RS01505	CpCpT1_RS09855	0.974
CpCpT1_RS02815	CpCpT1_RS08950	0.974
CpCpT1_RS07155	CpCpT1_RS03460	0.974
CpCpT1_RS03510	CpCpT1_RS06955	0.974
CpCpT1_RS07170	CpCpT1_RS00960	0.974
CpCpT1_RS08100	CpCpT1_RS08360	0.974
CpCpT1_RS03000	CpCpT1_RS01620	0.974
CpCpT1_RS05065	CpCpT1_RS07620	0.974
CpCpT1_RS05385	CpCpT1_RS00850	0.974
CpCpT1_RS07170	CpCpT1_RS05135	0.974
CpCpT1_RS05065	CpCpT1_RS06000	0.974
CpCpT1_RS03000	CpCpT1_RS10850	0.974
CpCpT1_RS10390	CpCpT1_RS01615	0.974
CpCpT1_RS03510	CpCpT1_RS03045	0.974
CpCpT1_RS10390	CpCpT1_RS00890	0.974
CpCpT1_RS04725	CpCpT1_RS03250	0.974
CpCpT1_RS02190	CpCpT1_RS02620	0.974
CpCpT1_RS01160	CpCpT1_RS07430	0.974
CpCpT1_RS09960	CpCpT1_RS07610	0.974
CpCpT1_RS09730	CpCpT1_RS06810	0.974
CpCpT1_RS04895	CpCpT1_RS09260	0.974
CpCpT1_RS06470	CpCpT1_RS08795	0.974
CpCpT1_RS09705	CpCpT1_RS04090	0.974
CpCpT1_RS02160	CpCpT1_RS07705	0.974
CpCpT1_RS00965	CpCpT1_RS01875	0.974
CpCpT1_RS10390	CpCpT1_RS08735	0.974
CpCpT1_RS09350	CpCpT1_RS04010	0.974
CpCpT1_RS02295	CpCpT1_RS10090	0.974
CpCpT1_RS06470	CpCpT1_RS09185	0.974
CpCpT1_RS02295	CpCpT1_RS01240	0.974
CpCpT1_RS08015	CpCpT1_RS09655	0.974
CpCpT1_RS02190	CpCpT1_RS10240	0.974
CpCpT1_RS00355	CpCpT1_RS07980	0.974
CpCpT1_RS03345	CpCpT1_RS07075	0.974
CpCpT1_RS06125	CpCpT1_RS05060	0.974
CpCpT1_RS00850	CpCpT1_RS05385	0.974
CpCpT1_RS01495	CpCpT1_RS10145	0.974
CpCpT1_RS02220	CpCpT1_RS00260	0.974
CpCpT1_RS10125	CpCpT1_RS00730	0.974
CpCpT1_RS03000	CpCpT1_RS00215	0.974
CpCpT1_RS10355	CpCpT1_RS02435	0.974
CpCpT1_RS07860	CpCpT1_RS05460	0.974
CpCpT1_RS00965	CpCpT1_RS00385	0.974
CpCpT1_RS08425	CpCpT1_RS05310	0.974
CpCpT1_RS00355	CpCpT1_RS08265	0.974
CpCpT1_RS03515	CpCpT1_RS09565	0.974
CpCpT1_RS00355	CpCpT1_RS09050	0.974
CpCpT1_RS03510	CpCpT1_RS01910	0.974
CpCpT1_RS03000	CpCpT1_RS07310	0.974
CpCpT1_RS05065	CpCpT1_RS06980	0.974
CpCpT1_RS03980	CpCpT1_RS00225	0.974
CpCpT1_RS02180	CpCpT1_RS03920	0.974
CpCpT1_RS03495	CpCpT1_RS00610	0.974
CpCpT1_RS01235	CpCpT1_RS01610	0.974
CpCpT1_RS03405	CpCpT1_RS06995	0.974
CpCpT1_RS01300	CpCpT1_RS02970	0.974
CpCpT1_RS09535	CpCpT1_RS05150	0.974
CpCpT1_RS10125	CpCpT1_RS10130	0.974
CpCpT1_RS03495	CpCpT1_RS10890	0.974
CpCpT1_RS00355	CpCpT1_RS08770	0.974
CpCpT1_RS07170	CpCpT1_RS06380	0.974
CpCpT1_RS01985	CpCpT1_RS08260	0.973
CpCpT1_RS02815	CpCpT1_RS04615	0.973
CpCpT1_RS10390	CpCpT1_RS09670	0.973
CpCpT1_RS03690	CpCpT1_RS07495	0.973
CpCpT1_RS03910	CpCpT1_RS05055	0.973
CpCpT1_RS10225	CpCpT1_RS00625	0.973
CpCpT1_RS03225	CpCpT1_RS04835	0.973
CpCpT1_RS00895	CpCpT1_RS04730	0.973
CpCpT1_RS05385	CpCpT1_RS01775	0.973
CpCpT1_RS09535	CpCpT1_RS08550	0.973
CpCpT1_RS05095	CpCpT1_RS00340	0.973
CpCpT1_RS08590	CpCpT1_RS03310	0.973
CpCpT1_RS01300	CpCpT1_RS00920	0.973
CpCpT1_RS06060	CpCpT1_RS05610	0.973
CpCpT1_RS10355	CpCpT1_RS06660	0.973
CpCpT1_RS04725	CpCpT1_RS01850	0.973
CpCpT1_RS07170	CpCpT1_RS05355	0.973
CpCpT1_RS09730	CpCpT1_RS02780	0.973
CpCpT1_RS07420	CpCpT1_RS06440	0.973
CpCpT1_RS06685	CpCpT1_RS09575	0.973
CpCpT1_RS03450	CpCpT1_RS00440	0.973
CpCpT1_RS04725	CpCpT1_RS01540	0.973
CpCpT1_RS02205	CpCpT1_RS02200	0.973
CpCpT1_RS01030	CpCpT1_RS03360	0.973
CpCpT1_RS09275	CpCpT1_RS04515	0.973
CpCpT1_RS02220	CpCpT1_RS10850	0.973
CpCpT1_RS09275	CpCpT1_RS00560	0.973
CpCpT1_RS03225	CpCpT1_RS07595	0.973
CpCpT1_RS03690	CpCpT1_RS06420	0.973
CpCpT1_RS09165	CpCpT1_RS09890	0.973
CpCpT1_RS05385	CpCpT1_RS09590	0.973
CpCpT1_RS03910	CpCpT1_RS00470	0.973
CpCpT1_RS05095	CpCpT1_RS02930	0.973
CpCpT1_RS07170	CpCpT1_RS03645	0.973
CpCpT1_RS07740	CpCpT1_RS00880	0.973
CpCpT1_RS03000	CpCpT1_RS00570	0.973
CpCpT1_RS05065	CpCpT1_RS04700	0.973
CpCpT1_RS08755	CpCpT1_RS04225	0.973
CpCpT1_RS05550	CpCpT1_RS04930	0.973
CpCpT1_RS05190	CpCpT1_RS08590	0.973
CpCpT1_RS01505	CpCpT1_RS04135	0.973
CpCpT1_RS03105	CpCpT1_RS08030	0.973
CpCpT1_RS01495	CpCpT1_RS03235	0.973
CpCpT1_RS03980	CpCpT1_RS01240	0.973
CpCpT1_RS03345	CpCpT1_RS10255	0.973
CpCpT1_RS03515	CpCpT1_RS08415	0.973
CpCpT1_RS10175	CpCpT1_RS02060	0.973
CpCpT1_RS06350	CpCpT1_RS07135	0.973
CpCpT1_RS09995	CpCpT1_RS06160	0.973
CpCpT1_RS10150	CpCpT1_RS08165	0.973
CpCpT1_RS07155	CpCpT1_RS08050	0.973
CpCpT1_RS03515	CpCpT1_RS09945	0.973
CpCpT1_RS03345	CpCpT1_RS07090	0.973
CpCpT1_RS08095	CpCpT1_RS01605	0.973
CpCpT1_RS05190	CpCpT1_RS06395	0.973
CpCpT1_RS09505	CpCpT1_RS06075	0.973
CpCpT1_RS09765	CpCpT1_RS08340	0.973
CpCpT1_RS06845	CpCpT1_RS09045	0.973
CpCpT1_RS09960	CpCpT1_RS08610	0.973
CpCpT1_RS08015	CpCpT1_RS09475	0.973
CpCpT1_RS09960	CpCpT1_RS08590	0.973
CpCpT1_RS02160	CpCpT1_RS03100	0.973
CpCpT1_RS06685	CpCpT1_RS08160	0.973
CpCpT1_RS07865	CpCpT1_RS10005	0.973
CpCpT1_RS02425	CpCpT1_RS05750	0.973
CpCpT1_RS05190	CpCpT1_RS00805	0.973
CpCpT1_RS02295	CpCpT1_RS07795	0.973
CpCpT1_RS03490	CpCpT1_RS00975	0.972
CpCpT1_RS04725	CpCpT1_RS04230	0.972
CpCpT1_RS08360	CpCpT1_RS06015	0.972
CpCpT1_RS03405	CpCpT1_RS06285	0.972
CpCpT1_RS04380	CpCpT1_RS00695	0.972
CpCpT1_RS09995	CpCpT1_RS02375	0.972
CpCpT1_RS01235	CpCpT1_RS01620	0.972
CpCpT1_RS08720	CpCpT1_RS10300	0.972
CpCpT1_RS06685	CpCpT1_RS06725	0.972
CpCpT1_RS07865	CpCpT1_RS04865	0.972
CpCpT1_RS03225	CpCpT1_RS01935	0.972
CpCpT1_RS01505	CpCpT1_RS09695	0.972
CpCpT1_RS03450	CpCpT1_RS06420	0.972
CpCpT1_RS07420	CpCpT1_RS00990	0.972
CpCpT1_RS07985	CpCpT1_RS01155	0.972
CpCpT1_RS05385	CpCpT1_RS00105	0.972
CpCpT1_RS03105	CpCpT1_RS00045	0.972
CpCpT1_RS03510	CpCpT1_RS07490	0.972
CpCpT1_RS03515	CpCpT1_RS08570	0.972
CpCpT1_RS10150	CpCpT1_RS03890	0.972
CpCpT1_RS02175	CpCpT1_RS09230	0.972
CpCpT1_RS06470	CpCpT1_RS09135	0.972
CpCpT1_RS08590	CpCpT1_RS07525	0.972
CpCpT1_RS08100	CpCpT1_RS10065	0.972
CpCpT1_RS09350	CpCpT1_RS03425	0.972
CpCpT1_RS04305	CpCpT1_RS03190	0.972
CpCpT1_RS09350	CpCpT1_RS02905	0.972
CpCpT1_RS05550	CpCpT1_RS04715	0.972
CpCpT1_RS03515	CpCpT1_RS03250	0.972
CpCpT1_RS03105	CpCpT1_RS05570	0.972
CpCpT1_RS07865	CpCpT1_RS03625	0.972
CpCpT1_RS04610	CpCpT1_RS07620	0.972
CpCpT1_RS10150	CpCpT1_RS06020	0.972
CpCpT1_RS07740	CpCpT1_RS08535	0.972
CpCpT1_RS01505	CpCpT1_RS09305	0.972
CpCpT1_RS10225	CpCpT1_RS03430	0.972
CpCpT1_RS09960	CpCpT1_RS08225	0.972
CpCpT1_RS09705	CpCpT1_RS10390	0.972
CpCpT1_RS09995	CpCpT1_RS01610	0.972
CpCpT1_RS02325	CpCpT1_RS08415	0.972
CpCpT1_RS05065	CpCpT1_RS05530	0.972
CpCpT1_RS06695	CpCpT1_RS02930	0.972
CpCpT1_RS05385	CpCpT1_RS02295	0.972
CpCpT1_RS01290	CpCpT1_RS04630	0.972
CpCpT1_RS03465	CpCpT1_RS09180	0.972
CpCpT1_RS02160	CpCpT1_RS07380	0.972
CpCpT1_RS04895	CpCpT1_RS08070	0.972
CpCpT1_RS08425	CpCpT1_RS00610	0.972
CpCpT1_RS08015	CpCpT1_RS10780	0.972
CpCpT1_RS04725	CpCpT1_RS04930	0.972
CpCpT1_RS02205	CpCpT1_RS06125	0.972
CpCpT1_RS01160	CpCpT1_RS08400	0.972
CpCpT1_RS00975	CpCpT1_RS06335	0.972
CpCpT1_RS06695	CpCpT1_RS04515	0.972
CpCpT1_RS02295	CpCpT1_RS08320	0.972
CpCpT1_RS07865	CpCpT1_RS10025	0.972
CpCpT1_RS06685	CpCpT1_RS10010	0.972
CpCpT1_RS02160	CpCpT1_RS05985	0.972
CpCpT1_RS05385	CpCpT1_RS03955	0.972
CpCpT1_RS03585	CpCpT1_RS04800	0.972
CpCpT1_RS05550	CpCpT1_RS06240	0.972
CpCpT1_RS00535	CpCpT1_RS05280	0.972
CpCpT1_RS10175	CpCpT1_RS02140	0.972
CpCpT1_RS02295	CpCpT1_RS00570	0.972
CpCpT1_RS03690	CpCpT1_RS10060	0.972
CpCpT1_RS03660	CpCpT1_RS06705	0.972
CpCpT1_RS02630	CpCpT1_RS03675	0.972
CpCpT1_RS09075	CpCpT1_RS04535	0.972
CpCpT1_RS00620	CpCpT1_RS04110	0.972
CpCpT1_RS00975	CpCpT1_RS05425	0.972
CpCpT1_RS07010	CpCpT1_RS07210	0.972
CpCpT1_RS02660	CpCpT1_RS01195	0.971
CpCpT1_RS07865	CpCpT1_RS09770	0.971
CpCpT1_RS04725	CpCpT1_RS01045	0.971
CpCpT1_RS09730	CpCpT1_RS07545	0.971
CpCpT1_RS07865	CpCpT1_RS03085	0.971
CpCpT1_RS02730	CpCpT1_RS07905	0.971
CpCpT1_RS03225	CpCpT1_RS05290	0.971
CpCpT1_RS09350	CpCpT1_RS06600	0.971
CpCpT1_RS02175	CpCpT1_RS09470	0.971
CpCpT1_RS04560	CpCpT1_RS09825	0.971
CpCpT1_RS03345	CpCpT1_RS01075	0.971
CpCpT1_RS09350	CpCpT1_RS07365	0.971
CpCpT1_RS07740	CpCpT1_RS09890	0.971
CpCpT1_RS10390	CpCpT1_RS09700	0.971
CpCpT1_RS05005	CpCpT1_RS06085	0.971
CpCpT1_RS10150	CpCpT1_RS05640	0.971
CpCpT1_RS01300	CpCpT1_RS01220	0.971
CpCpT1_RS03465	CpCpT1_RS07605	0.971
CpCpT1_RS04725	CpCpT1_RS04635	0.971
CpCpT1_RS02630	CpCpT1_RS01290	0.971
CpCpT1_RS05550	CpCpT1_RS03870	0.971
CpCpT1_RS05385	CpCpT1_RS09950	0.971
CpCpT1_RS10150	CpCpT1_RS02675	0.971
CpCpT1_RS04725	CpCpT1_RS09580	0.971
CpCpT1_RS09505	CpCpT1_RS09110	0.971
CpCpT1_RS03910	CpCpT1_RS08810	0.971
CpCpT1_RS05385	CpCpT1_RS10850	0.971
CpCpT1_RS04980	CpCpT1_RS08765	0.971
CpCpT1_RS07865	CpCpT1_RS01840	0.971
CpCpT1_RS04495	CpCpT1_RS04890	0.971
CpCpT1_RS09730	CpCpT1_RS07250	0.971
CpCpT1_RS01505	CpCpT1_RS01855	0.971
CpCpT1_RS04725	CpCpT1_RS02165	0.971
CpCpT1_RS02160	CpCpT1_RS06780	0.971
CpCpT1_RS10180	CpCpT1_RS04220	0.971
CpCpT1_RS08095	CpCpT1_RS01115	0.971
CpCpT1_RS01600	CpCpT1_RS00565	0.971
CpCpT1_RS03380	CpCpT1_RS01835	0.971
CpCpT1_RS00975	CpCpT1_RS03260	0.971
CpCpT1_RS02300	CpCpT1_RS10080	0.971
CpCpT1_RS06640	CpCpT1_RS02320	0.971
CpCpT1_RS05550	CpCpT1_RS06945	0.971
CpCpT1_RS02295	CpCpT1_RS04185	0.971
CpCpT1_RS00535	CpCpT1_RS09730	0.971
CpCpT1_RS03345	CpCpT1_RS01140	0.971
CpCpT1_RS02355	CpCpT1_RS02250	0.971
CpCpT1_RS03660	CpCpT1_RS03075	0.971
CpCpT1_RS05385	CpCpT1_RS00880	0.971
CpCpT1_RS09910	CpCpT1_RS07385	0.971
CpCpT1_RS03495	CpCpT1_RS10185	0.971
CpCpT1_RS03510	CpCpT1_RS05720	0.971
CpCpT1_RS00460	CpCpT1_RS06250	0.971
CpCpT1_RS03660	CpCpT1_RS10405	0.971
CpCpT1_RS03015	CpCpT1_RS07970	0.971
CpCpT1_RS03000	CpCpT1_RS01235	0.971
CpCpT1_RS03380	CpCpT1_RS05975	0.971
CpCpT1_RS09765	CpCpT1_RS08030	0.971
CpCpT1_RS10390	CpCpT1_RS01670	0.971
CpCpT1_RS06685	CpCpT1_RS07360	0.971
CpCpT1_RS03980	CpCpT1_RS08670	0.971
CpCpT1_RS03495	CpCpT1_RS08425	0.971
CpCpT1_RS08425	CpCpT1_RS09355	0.971
CpCpT1_RS03660	CpCpT1_RS02295	0.971
CpCpT1_RS03235	CpCpT1_RS06395	0.971
CpCpT1_RS06685	CpCpT1_RS01210	0.971
CpCpT1_RS02300	CpCpT1_RS05480	0.971
CpCpT1_RS10175	CpCpT1_RS07975	0.971
CpCpT1_RS09765	CpCpT1_RS09650	0.971
CpCpT1_RS01300	CpCpT1_RS00460	0.971
CpCpT1_RS09350	CpCpT1_RS02265	0.971
CpCpT1_RS05065	CpCpT1_RS02085	0.971
CpCpT1_RS02730	CpCpT1_RS02080	0.971
CpCpT1_RS07740	CpCpT1_RS03190	0.971
CpCpT1_RS09995	CpCpT1_RS07765	0.971
CpCpT1_RS03085	CpCpT1_RS10410	0.971
CpCpT1_RS05005	CpCpT1_RS02795	0.971
CpCpT1_RS01300	CpCpT1_RS00660	0.971
CpCpT1_RS02845	CpCpT1_RS00525	0.971
CpCpT1_RS03000	CpCpT1_RS00850	0.971
CpCpT1_RS05065	CpCpT1_RS06385	0.971
CpCpT1_RS00965	CpCpT1_RS09195	0.971
CpCpT1_RS05550	CpCpT1_RS06745	0.971
CpCpT1_RS02815	CpCpT1_RS07890	0.971
CpCpT1_RS07770	CpCpT1_RS08345	0.971
CpCpT1_RS10355	CpCpT1_RS08585	0.971
CpCpT1_RS08970	CpCpT1_RS07115	0.971
CpCpT1_RS05385	CpCpT1_RS00570	0.971
CpCpT1_RS08360	CpCpT1_RS02630	0.97
CpCpT1_RS07010	CpCpT1_RS02375	0.97
CpCpT1_RS03000	CpCpT1_RS01230	0.97
CpCpT1_RS03000	CpCpT1_RS03075	0.97
CpCpT1_RS02815	CpCpT1_RS03320	0.97
CpCpT1_RS03510	CpCpT1_RS09530	0.97
CpCpT1_RS05550	CpCpT1_RS10425	0.97
CpCpT1_RS09995	CpCpT1_RS07210	0.97
CpCpT1_RS03000	CpCpT1_RS10385	0.97
CpCpT1_RS10150	CpCpT1_RS04575	0.97
CpCpT1_RS02300	CpCpT1_RS03630	0.97
CpCpT1_RS02175	CpCpT1_RS00880	0.97
CpCpT1_RS02730	CpCpT1_RS05475	0.97
CpCpT1_RS06710	CpCpT1_RS01565	0.97
CpCpT1_RS00895	CpCpT1_RS07710	0.97
CpCpT1_RS03515	CpCpT1_RS07635	0.97
CpCpT1_RS09730	CpCpT1_RS10150	0.97
CpCpT1_RS03000	CpCpT1_RS02380	0.97
CpCpT1_RS05005	CpCpT1_RS06915	0.97
CpCpT1_RS02175	CpCpT1_RS03520	0.97
CpCpT1_RS09705	CpCpT1_RS07195	0.97
CpCpT1_RS08095	CpCpT1_RS07765	0.97
CpCpT1_RS03105	CpCpT1_RS00015	0.97
CpCpT1_RS09960	CpCpT1_RS02150	0.97
CpCpT1_RS06845	CpCpT1_RS06385	0.97
CpCpT1_RS01205	CpCpT1_RS04615	0.97
CpCpT1_RS09350	CpCpT1_RS06570	0.97
CpCpT1_RS09350	CpCpT1_RS09415	0.97
CpCpT1_RS05190	CpCpT1_RS10165	0.97
CpCpT1_RS07740	CpCpT1_RS05510	0.97
CpCpT1_RS02180	CpCpT1_RS08955	0.97
CpCpT1_RS09705	CpCpT1_RS09875	0.97
CpCpT1_RS06470	CpCpT1_RS08790	0.97
CpCpT1_RS03230	CpCpT1_RS00835	0.97
CpCpT1_RS02205	CpCpT1_RS00665	0.97
CpCpT1_RS05065	CpCpT1_RS03545	0.97
CpCpT1_RS02425	CpCpT1_RS01970	0.97
CpCpT1_RS09705	CpCpT1_RS02825	0.97
CpCpT1_RS05550	CpCpT1_RS06225	0.97
CpCpT1_RS07420	CpCpT1_RS06160	0.97
CpCpT1_RS02690	CpCpT1_RS08550	0.97
CpCpT1_RS03690	CpCpT1_RS06800	0.97
CpCpT1_RS05550	CpCpT1_RS04725	0.97
CpCpT1_RS08015	CpCpT1_RS00805	0.97
CpCpT1_RS06685	CpCpT1_RS04730	0.97
CpCpT1_RS04305	CpCpT1_RS06720	0.97
CpCpT1_RS09350	CpCpT1_RS10010	0.97
CpCpT1_RS02845	CpCpT1_RS09655	0.97
CpCpT1_RS03380	CpCpT1_RS09150	0.97
CpCpT1_RS07600	CpCpT1_RS09585	0.97
CpCpT1_RS00850	CpCpT1_RS08670	0.97
CpCpT1_RS09350	CpCpT1_RS03560	0.97
CpCpT1_RS01390	CpCpT1_RS04815	0.97
CpCpT1_RS09350	CpCpT1_RS03185	0.97
CpCpT1_RS00355	CpCpT1_RS07075	0.97
CpCpT1_RS03380	CpCpT1_RS05740	0.97
CpCpT1_RS09350	CpCpT1_RS05370	0.97
CpCpT1_RS09350	CpCpT1_RS06480	0.97
CpCpT1_RS02295	CpCpT1_RS01600	0.97
CpCpT1_RS01505	CpCpT1_RS01945	0.97
CpCpT1_RS05190	CpCpT1_RS04850	0.97
CpCpT1_RS06685	CpCpT1_RS01475	0.97
CpCpT1_RS06065	CpCpT1_RS06785	0.97
CpCpT1_RS02220	CpCpT1_RS02850	0.97
CpCpT1_RS07985	CpCpT1_RS00330	0.97
CpCpT1_RS05065	CpCpT1_RS03135	0.97
CpCpT1_RS06685	CpCpT1_RS03425	0.97
CpCpT1_RS06350	CpCpT1_RS06740	0.97
CpCpT1_RS02295	CpCpT1_RS03000	0.97
CpCpT1_RS06685	CpCpT1_RS05830	0.97
CpCpT1_RS09350	CpCpT1_RS09900	0.97
CpCpT1_RS05065	CpCpT1_RS05075	0.97
CpCpT1_RS08590	CpCpT1_RS03640	0.97
CpCpT1_RS05755	CpCpT1_RS03295	0.97
CpCpT1_RS09765	CpCpT1_RS03530	0.97
CpCpT1_RS00965	CpCpT1_RS04345	0.97
CpCpT1_RS00965	CpCpT1_RS07475	0.97
CpCpT1_RS09800	CpCpT1_RS07910	0.97
CpCpT1_RS07170	CpCpT1_RS01285	0.97
CpCpT1_RS02815	CpCpT1_RS09685	0.97
CpCpT1_RS02295	CpCpT1_RS01775	0.97
CpCpT1_RS05005	CpCpT1_RS01915	0.97
CpCpT1_RS03660	CpCpT1_RS03000	0.97
CpCpT1_RS03490	CpCpT1_RS01560	0.97
CpCpT1_RS05005	CpCpT1_RS08060	0.97
CpCpT1_RS09275	CpCpT1_RS02200	0.97
CpCpT1_RS09535	CpCpT1_RS01565	0.97
CpCpT1_RS09275	CpCpT1_RS01815	0.969
CpCpT1_RS00535	CpCpT1_RS01505	0.969
CpCpT1_RS00535	CpCpT1_RS07545	0.969
CpCpT1_RS10380	CpCpT1_RS03565	0.969
CpCpT1_RS09350	CpCpT1_RS07065	0.969
CpCpT1_RS03450	CpCpT1_RS10850	0.969
CpCpT1_RS02295	CpCpT1_RS10850	0.969
CpCpT1_RS05065	CpCpT1_RS09035	0.969
CpCpT1_RS00965	CpCpT1_RS06620	0.969
CpCpT1_RS07155	CpCpT1_RS02445	0.969
CpCpT1_RS09960	CpCpT1_RS07470	0.969
CpCpT1_RS01290	CpCpT1_RS00660	0.969
CpCpT1_RS07170	CpCpT1_RS06505	0.969
CpCpT1_RS02160	CpCpT1_RS09545	0.969
CpCpT1_RS06470	CpCpT1_RS09505	0.969
CpCpT1_RS01985	CpCpT1_RS01255	0.969
CpCpT1_RS05065	CpCpT1_RS00155	0.969
CpCpT1_RS00355	CpCpT1_RS09840	0.969
CpCpT1_RS05385	CpCpT1_RS08555	0.969
CpCpT1_RS09990	CpCpT1_RS04165	0.969
CpCpT1_RS02295	CpCpT1_RS00620	0.969
CpCpT1_RS03105	CpCpT1_RS06575	0.969
CpCpT1_RS06115	CpCpT1_RS06795	0.969
CpCpT1_RS03380	CpCpT1_RS04240	0.969
CpCpT1_RS03995	CpCpT1_RS06475	0.969
CpCpT1_RS01505	CpCpT1_RS02780	0.969
CpCpT1_RS09705	CpCpT1_RS07075	0.969
CpCpT1_RS00355	CpCpT1_RS00350	0.969
CpCpT1_RS01505	CpCpT1_RS09870	0.969
CpCpT1_RS05190	CpCpT1_RS07440	0.969
CpCpT1_RS01505	CpCpT1_RS06220	0.969
CpCpT1_RS03450	CpCpT1_RS06690	0.969
CpCpT1_RS03225	CpCpT1_RS08295	0.969
CpCpT1_RS01030	CpCpT1_RS02300	0.969
CpCpT1_RS09350	CpCpT1_RS02270	0.969
CpCpT1_RS10305	CpCpT1_RS01955	0.969
CpCpT1_RS00355	CpCpT1_RS08440	0.969
CpCpT1_RS10390	CpCpT1_RS05660	0.969
CpCpT1_RS04725	CpCpT1_RS08570	0.969
CpCpT1_RS09165	CpCpT1_RS06265	0.969
CpCpT1_RS03465	CpCpT1_RS07380	0.969
CpCpT1_RS03515	CpCpT1_RS02325	0.969
CpCpT1_RS05385	CpCpT1_RS10030	0.969
CpCpT1_RS05550	CpCpT1_RS03435	0.969
CpCpT1_RS02425	CpCpT1_RS08905	0.969
CpCpT1_RS02295	CpCpT1_RS00765	0.969
CpCpT1_RS04725	CpCpT1_RS05855	0.969
CpCpT1_RS01235	CpCpT1_RS00225	0.969
CpCpT1_RS03690	CpCpT1_RS10005	0.969
CpCpT1_RS08015	CpCpT1_RS03235	0.969
CpCpT1_RS08100	CpCpT1_RS02630	0.969
CpCpT1_RS06685	CpCpT1_RS05395	0.969
CpCpT1_RS03105	CpCpT1_RS01375	0.969
CpCpT1_RS03000	CpCpT1_RS10320	0.969
CpCpT1_RS06685	CpCpT1_RS09270	0.969
CpCpT1_RS09445	CpCpT1_RS08820	0.969
CpCpT1_RS07865	CpCpT1_RS02900	0.969
CpCpT1_RS02520	CpCpT1_RS06120	0.969
CpCpT1_RS02295	CpCpT1_RS03955	0.969
CpCpT1_RS00620	CpCpT1_RS08335	0.969
CpCpT1_RS08095	CpCpT1_RS10235	0.969
CpCpT1_RS07865	CpCpT1_RS10060	0.969
CpCpT1_RS03345	CpCpT1_RS03280	0.969
CpCpT1_RS00685	CpCpT1_RS02730	0.969
CpCpT1_RS03690	CpCpT1_RS03065	0.969
CpCpT1_RS10225	CpCpT1_RS09685	0.969
CpCpT1_RS01495	CpCpT1_RS00980	0.969
CpCpT1_RS06685	CpCpT1_RS03925	0.969
CpCpT1_RS10150	CpCpT1_RS07880	0.969
CpCpT1_RS09730	CpCpT1_RS04275	0.969
CpCpT1_RS08590	CpCpT1_RS08700	0.969
CpCpT1_RS04595	CpCpT1_RS01985	0.969
CpCpT1_RS02190	CpCpT1_RS07275	0.969
CpCpT1_RS05385	CpCpT1_RS00455	0.969
CpCpT1_RS03105	CpCpT1_RS05810	0.969
CpCpT1_RS05385	CpCpT1_RS07340	0.969
CpCpT1_RS09350	CpCpT1_RS08760	0.969
CpCpT1_RS05385	CpCpT1_RS07310	0.969
CpCpT1_RS08720	CpCpT1_RS10135	0.969
CpCpT1_RS03345	CpCpT1_RS10040	0.969
CpCpT1_RS00965	CpCpT1_RS01730	0.969
CpCpT1_RS06350	CpCpT1_RS02785	0.969
CpCpT1_RS00975	CpCpT1_RS05810	0.969
CpCpT1_RS02630	CpCpT1_RS05510	0.969
CpCpT1_RS07770	CpCpT1_RS08400	0.969
CpCpT1_RS02295	CpCpT1_RS01595	0.969
CpCpT1_RS09350	CpCpT1_RS02790	0.969
CpCpT1_RS04380	CpCpT1_RS02915	0.969
CpCpT1_RS03585	CpCpT1_RS09830	0.969
CpCpT1_RS00895	CpCpT1_RS03565	0.969
CpCpT1_RS06685	CpCpT1_RS10025	0.969
CpCpT1_RS07865	CpCpT1_RS01455	0.969
CpCpT1_RS09960	CpCpT1_RS07690	0.968
CpCpT1_RS05550	CpCpT1_RS04435	0.968
CpCpT1_RS04040	CpCpT1_RS02250	0.968
CpCpT1_RS09730	CpCpT1_RS06020	0.968
CpCpT1_RS09505	CpCpT1_RS05780	0.968
CpCpT1_RS09445	CpCpT1_RS01240	0.968
CpCpT1_RS02425	CpCpT1_RS00980	0.968
CpCpT1_RS06400	CpCpT1_RS05025	0.968
CpCpT1_RS03000	CpCpT1_RS07305	0.968
CpCpT1_RS09350	CpCpT1_RS04420	0.968
CpCpT1_RS03515	CpCpT1_RS00705	0.968
CpCpT1_RS00535	CpCpT1_RS00755	0.968
CpCpT1_RS00850	CpCpT1_RS00225	0.968
CpCpT1_RS00850	CpCpT1_RS03460	0.968
CpCpT1_RS04725	CpCpT1_RS01260	0.968
CpCpT1_RS09995	CpCpT1_RS08095	0.968
CpCpT1_RS04250	CpCpT1_RS03235	0.968
CpCpT1_RS07865	CpCpT1_RS07320	0.968
CpCpT1_RS03085	CpCpT1_RS04435	0.968
CpCpT1_RS00620	CpCpT1_RS01230	0.968
CpCpT1_RS02355	CpCpT1_RS05390	0.968
CpCpT1_RS02160	CpCpT1_RS10725	0.968
CpCpT1_RS03690	CpCpT1_RS00880	0.968
CpCpT1_RS05115	CpCpT1_RS06165	0.968
CpCpT1_RS06060	CpCpT1_RS10510	0.968
CpCpT1_RS07865	CpCpT1_RS00070	0.968
CpCpT1_RS02690	CpCpT1_RS06125	0.968
CpCpT1_RS02665	CpCpT1_RS02920	0.968
CpCpT1_RS01985	CpCpT1_RS04595	0.968
CpCpT1_RS06685	CpCpT1_RS05455	0.968
CpCpT1_RS08590	CpCpT1_RS07860	0.968
CpCpT1_RS03690	CpCpT1_RS07010	0.968
CpCpT1_RS03690	CpCpT1_RS02450	0.968
CpCpT1_RS06685	CpCpT1_RS01540	0.968
CpCpT1_RS03605	CpCpT1_RS03465	0.968
CpCpT1_RS02630	CpCpT1_RS04235	0.968
CpCpT1_RS00895	CpCpT1_RS06550	0.968
CpCpT1_RS05385	CpCpT1_RS07400	0.968
CpCpT1_RS07370	CpCpT1_RS00245	0.968
CpCpT1_RS06870	CpCpT1_RS09655	0.968
CpCpT1_RS06685	CpCpT1_RS00490	0.968
CpCpT1_RS04900	CpCpT1_RS08205	0.968
CpCpT1_RS06350	CpCpT1_RS05730	0.968
CpCpT1_RS00850	CpCpT1_RS07400	0.968
CpCpT1_RS00850	CpCpT1_RS06690	0.968
CpCpT1_RS00850	CpCpT1_RS03980	0.968
CpCpT1_RS07870	CpCpT1_RS06635	0.968
CpCpT1_RS03235	CpCpT1_RS01315	0.968
CpCpT1_RS05190	CpCpT1_RS03350	0.968
CpCpT1_RS09510	CpCpT1_RS09800	0.968
CpCpT1_RS06350	CpCpT1_RS04020	0.968
CpCpT1_RS04900	CpCpT1_RS02135	0.968
CpCpT1_RS01155	CpCpT1_RS05150	0.968
CpCpT1_RS10225	CpCpT1_RS00060	0.968
CpCpT1_RS01300	CpCpT1_RS00670	0.968
CpCpT1_RS01160	CpCpT1_RS02320	0.968
CpCpT1_RS06350	CpCpT1_RS08340	0.968
CpCpT1_RS03345	CpCpT1_RS02820	0.968
CpCpT1_RS03235	CpCpT1_RS06870	0.968
CpCpT1_RS02160	CpCpT1_RS08365	0.968
CpCpT1_RS03450	CpCpT1_RS07310	0.968
CpCpT1_RS04725	CpCpT1_RS04840	0.968
CpCpT1_RS02190	CpCpT1_RS09805	0.968
CpCpT1_RS03450	CpCpT1_RS03690	0.968
CpCpT1_RS03235	CpCpT1_RS01495	0.968
CpCpT1_RS09765	CpCpT1_RS02040	0.968
CpCpT1_RS01160	CpCpT1_RS08560	0.968
CpCpT1_RS02295	CpCpT1_RS07195	0.968
CpCpT1_RS04610	CpCpT1_RS03665	0.968
CpCpT1_RS07170	CpCpT1_RS10800	0.968
CpCpT1_RS07420	CpCpT1_RS07650	0.968
CpCpT1_RS04900	CpCpT1_RS02155	0.968
CpCpT1_RS08015	CpCpT1_RS03990	0.968
CpCpT1_RS08095	CpCpT1_RS07475	0.968
CpCpT1_RS05065	CpCpT1_RS05810	0.968
CpCpT1_RS03380	CpCpT1_RS03125	0.968
CpCpT1_RS09765	CpCpT1_RS02660	0.968
CpCpT1_RS03510	CpCpT1_RS03860	0.968
CpCpT1_RS07010	CpCpT1_RS07765	0.968
CpCpT1_RS09990	CpCpT1_RS02515	0.968
CpCpT1_RS02295	CpCpT1_RS05385	0.968
CpCpT1_RS00135	CpCpT1_RS00940	0.968
CpCpT1_RS05550	CpCpT1_RS05630	0.968
CpCpT1_RS03345	CpCpT1_RS02440	0.968
CpCpT1_RS00355	CpCpT1_RS07795	0.968
CpCpT1_RS05385	CpCpT1_RS00195	0.968
CpCpT1_RS01030	CpCpT1_RS03155	0.968
CpCpT1_RS05065	CpCpT1_RS05240	0.968
CpCpT1_RS02295	CpCpT1_RS08935	0.968
CpCpT1_RS07010	CpCpT1_RS03690	0.968
CpCpT1_RS00355	CpCpT1_RS00200	0.968
CpCpT1_RS03920	CpCpT1_RS06180	0.968
CpCpT1_RS05550	CpCpT1_RS05745	0.968
CpCpT1_RS03510	CpCpT1_RS01060	0.968
CpCpT1_RS05385	CpCpT1_RS03195	0.968
CpCpT1_RS05550	CpCpT1_RS01175	0.968
CpCpT1_RS03660	CpCpT1_RS04315	0.968
CpCpT1_RS00355	CpCpT1_RS03075	0.968
CpCpT1_RS07865	CpCpT1_RS06360	0.968
CpCpT1_RS01300	CpCpT1_RS02225	0.968
CpCpT1_RS03510	CpCpT1_RS07720	0.968
CpCpT1_RS05065	CpCpT1_RS04170	0.968
CpCpT1_RS02295	CpCpT1_RS03080	0.968
CpCpT1_RS03995	CpCpT1_RS10855	0.968
CpCpT1_RS00355	CpCpT1_RS03280	0.968
CpCpT1_RS08285	CpCpT1_RS04985	0.968
CpCpT1_RS08095	CpCpT1_RS07210	0.968
CpCpT1_RS05550	CpCpT1_RS04840	0.968
CpCpT1_RS01505	CpCpT1_RS06295	0.968
CpCpT1_RS08720	CpCpT1_RS08680	0.968
CpCpT1_RS05385	CpCpT1_RS07100	0.968
CpCpT1_RS02295	CpCpT1_RS10405	0.968
CpCpT1_RS05385	CpCpT1_RS03020	0.968
CpCpT1_RS10175	CpCpT1_RS01900	0.968
CpCpT1_RS08095	CpCpT1_RS04315	0.968
CpCpT1_RS05550	CpCpT1_RS10160	0.968
CpCpT1_RS03345	CpCpT1_RS07085	0.967
CpCpT1_RS05065	CpCpT1_RS05940	0.967
CpCpT1_RS03510	CpCpT1_RS04070	0.967
CpCpT1_RS04305	CpCpT1_RS03650	0.967
CpCpT1_RS06350	CpCpT1_RS08690	0.967
CpCpT1_RS03475	CpCpT1_RS08285	0.967
CpCpT1_RS08360	CpCpT1_RS04235	0.967
CpCpT1_RS09350	CpCpT1_RS05165	0.967
CpCpT1_RS09995	CpCpT1_RS07505	0.967
CpCpT1_RS02295	CpCpT1_RS00300	0.967
CpCpT1_RS00355	CpCpT1_RS05170	0.967
CpCpT1_RS05095	CpCpT1_RS02650	0.967
CpCpT1_RS04610	CpCpT1_RS05700	0.967
CpCpT1_RS03450	CpCpT1_RS09950	0.967
CpCpT1_RS03515	CpCpT1_RS10795	0.967
CpCpT1_RS03510	CpCpT1_RS03290	0.967
CpCpT1_RS00965	CpCpT1_RS04500	0.967
CpCpT1_RS05550	CpCpT1_RS07630	0.967
CpCpT1_RS07865	CpCpT1_RS06390	0.967
CpCpT1_RS09350	CpCpT1_RS01450	0.967
CpCpT1_RS09960	CpCpT1_RS07860	0.967
CpCpT1_RS04725	CpCpT1_RS04490	0.967
CpCpT1_RS07370	CpCpT1_RS08580	0.967
CpCpT1_RS06065	CpCpT1_RS06240	0.967
CpCpT1_RS07715	CpCpT1_RS09625	0.967
CpCpT1_RS09505	CpCpT1_RS06310	0.967
CpCpT1_RS00850	CpCpT1_RS05660	0.967
CpCpT1_RS05065	CpCpT1_RS05365	0.967
CpCpT1_RS09765	CpCpT1_RS02530	0.967
CpCpT1_RS10175	CpCpT1_RS05340	0.967
CpCpT1_RS03995	CpCpT1_RS09605	0.967
CpCpT1_RS02160	CpCpT1_RS06825	0.967
CpCpT1_RS03745	CpCpT1_RS02560	0.967
CpCpT1_RS04560	CpCpT1_RS04220	0.967
CpCpT1_RS09730	CpCpT1_RS02645	0.967
CpCpT1_RS09730	CpCpT1_RS09855	0.967
CpCpT1_RS09350	CpCpT1_RS02895	0.967
CpCpT1_RS09730	CpCpT1_RS00930	0.967
CpCpT1_RS03510	CpCpT1_RS07375	0.967
CpCpT1_RS02295	CpCpT1_RS01235	0.967
CpCpT1_RS05190	CpCpT1_RS07680	0.967
CpCpT1_RS09350	CpCpT1_RS02285	0.967
CpCpT1_RS09350	CpCpT1_RS07320	0.967
CpCpT1_RS05065	CpCpT1_RS05220	0.967
CpCpT1_RS03510	CpCpT1_RS00830	0.967
CpCpT1_RS05550	CpCpT1_RS09340	0.967
CpCpT1_RS01300	CpCpT1_RS06250	0.967
CpCpT1_RS01495	CpCpT1_RS01165	0.967
CpCpT1_RS09765	CpCpT1_RS05050	0.967
CpCpT1_RS02575	CpCpT1_RS05085	0.967
CpCpT1_RS07740	CpCpT1_RS02730	0.967
CpCpT1_RS09995	CpCpT1_RS06890	0.967
CpCpT1_RS03225	CpCpT1_RS04530	0.967
CpCpT1_RS07865	CpCpT1_RS02285	0.967
CpCpT1_RS04725	CpCpT1_RS06595	0.967
CpCpT1_RS03105	CpCpT1_RS01525	0.967
CpCpT1_RS10180	CpCpT1_RS05450	0.967
CpCpT1_RS08880	CpCpT1_RS06450	0.967
CpCpT1_RS10380	CpCpT1_RS00070	0.967
CpCpT1_RS08880	CpCpT1_RS09425	0.967
CpCpT1_RS09765	CpCpT1_RS08420	0.967
CpCpT1_RS00355	CpCpT1_RS06435	0.967
CpCpT1_RS04040	CpCpT1_RS00235	0.967
CpCpT1_RS07860	CpCpT1_RS08750	0.967
CpCpT1_RS03345	CpCpT1_RS09705	0.967
CpCpT1_RS02190	CpCpT1_RS03205	0.967
CpCpT1_RS09075	CpCpT1_RS00610	0.967
CpCpT1_RS09960	CpCpT1_RS01165	0.967
CpCpT1_RS06065	CpCpT1_RS04970	0.967
CpCpT1_RS03660	CpCpT1_RS02620	0.967
CpCpT1_RS04610	CpCpT1_RS05630	0.967
CpCpT1_RS01160	CpCpT1_RS04855	0.967
CpCpT1_RS05065	CpCpT1_RS09750	0.967
CpCpT1_RS02175	CpCpT1_RS03450	0.967
CpCpT1_RS05385	CpCpT1_RS07305	0.967
CpCpT1_RS08015	CpCpT1_RS08640	0.967
CpCpT1_RS06685	CpCpT1_RS07995	0.967
CpCpT1_RS05550	CpCpT1_RS04000	0.967
CpCpT1_RS03345	CpCpT1_RS08320	0.967
CpCpT1_RS02425	CpCpT1_RS04670	0.967
CpCpT1_RS10225	CpCpT1_RS08885	0.967
CpCpT1_RS06060	CpCpT1_RS00595	0.967
CpCpT1_RS09960	CpCpT1_RS02510	0.967
CpCpT1_RS06350	CpCpT1_RS10015	0.967
CpCpT1_RS05550	CpCpT1_RS06360	0.967
CpCpT1_RS02200	CpCpT1_RS08550	0.967
CpCpT1_RS04150	CpCpT1_RS07255	0.967
CpCpT1_RS09505	CpCpT1_RS09615	0.967
CpCpT1_RS03450	CpCpT1_RS07640	0.967
CpCpT1_RS07420	CpCpT1_RS09195	0.967
CpCpT1_RS02295	CpCpT1_RS08555	0.967
CpCpT1_RS05065	CpCpT1_RS07840	0.967
CpCpT1_RS00715	CpCpT1_RS07690	0.967
CpCpT1_RS09075	CpCpT1_RS04545	0.967
CpCpT1_RS01160	CpCpT1_RS05275	0.967
CpCpT1_RS06845	CpCpT1_RS00615	0.967
CpCpT1_RS06685	CpCpT1_RS00635	0.967
CpCpT1_RS01675	CpCpT1_RS08700	0.967
CpCpT1_RS03085	CpCpT1_RS04715	0.967
CpCpT1_RS06845	CpCpT1_RS00655	0.967
CpCpT1_RS08100	CpCpT1_RS01290	0.967
CpCpT1_RS00135	CpCpT1_RS10245	0.967
CpCpT1_RS02205	CpCpT1_RS01985	0.967
CpCpT1_RS08095	CpCpT1_RS01225	0.967
CpCpT1_RS07865	CpCpT1_RS03790	0.967
CpCpT1_RS08885	CpCpT1_RS09395	0.967
CpCpT1_RS04665	CpCpT1_RS03050	0.967
CpCpT1_RS08015	CpCpT1_RS08150	0.967
CpCpT1_RS05190	CpCpT1_RS07525	0.967
CpCpT1_RS09350	CpCpT1_RS02400	0.967
CpCpT1_RS00715	CpCpT1_RS10490	0.967
CpCpT1_RS10225	CpCpT1_RS05335	0.967
CpCpT1_RS08015	CpCpT1_RS01495	0.967
CpCpT1_RS07240	CpCpT1_RS09555	0.967
CpCpT1_RS08360	CpCpT1_RS02475	0.967
CpCpT1_RS02300	CpCpT1_RS09245	0.967
CpCpT1_RS04900	CpCpT1_RS05785	0.967
CpCpT1_RS10150	CpCpT1_RS08230	0.967
CpCpT1_RS03015	CpCpT1_RS02540	0.967
CpCpT1_RS06685	CpCpT1_RS02285	0.967
CpCpT1_RS02730	CpCpT1_RS01635	0.967
CpCpT1_RS00535	CpCpT1_RS08020	0.967
CpCpT1_RS00535	CpCpT1_RS08230	0.967
CpCpT1_RS07770	CpCpT1_RS02010	0.967
CpCpT1_RS02295	CpCpT1_RS09950	0.966
CpCpT1_RS00620	CpCpT1_RS01035	0.966
CpCpT1_RS06845	CpCpT1_RS01825	0.966
CpCpT1_RS05065	CpCpT1_RS05580	0.966
CpCpT1_RS03660	CpCpT1_RS05195	0.966
CpCpT1_RS09705	CpCpT1_RS07150	0.966
CpCpT1_RS02295	CpCpT1_RS08265	0.966
CpCpT1_RS00355	CpCpT1_RS07100	0.966
CpCpT1_RS05385	CpCpT1_RS04185	0.966
CpCpT1_RS04250	CpCpT1_RS02250	0.966
CpCpT1_RS07860	CpCpT1_RS10735	0.966
CpCpT1_RS00355	CpCpT1_RS08735	0.966
CpCpT1_RS04725	CpCpT1_RS05585	0.966
CpCpT1_RS04725	CpCpT1_RS03525	0.966
CpCpT1_RS07740	CpCpT1_RS07735	0.966
CpCpT1_RS09765	CpCpT1_RS09145	0.966
CpCpT1_RS03015	CpCpT1_RS03435	0.966
CpCpT1_RS00850	CpCpT1_RS02295	0.966
CpCpT1_RS06125	CpCpT1_RS06635	0.966
CpCpT1_RS02295	CpCpT1_RS00190	0.966
CpCpT1_RS01495	CpCpT1_RS03115	0.966
CpCpT1_RS07870	CpCpT1_RS03545	0.966
CpCpT1_RS05385	CpCpT1_RS01665	0.966
CpCpT1_RS00975	CpCpT1_RS04700	0.966
CpCpT1_RS05190	CpCpT1_RS09170	0.966
CpCpT1_RS01720	CpCpT1_RS05505	0.966
CpCpT1_RS00965	CpCpT1_RS08965	0.966
CpCpT1_RS03450	CpCpT1_RS00455	0.966
CpCpT1_RS09705	CpCpT1_RS03240	0.966
CpCpT1_RS05065	CpCpT1_RS02590	0.966
CpCpT1_RS03085	CpCpT1_RS10530	0.966
CpCpT1_RS01675	CpCpT1_RS00320	0.966
CpCpT1_RS07370	CpCpT1_RS06125	0.966
CpCpT1_RS03510	CpCpT1_RS08805	0.966
CpCpT1_RS06350	CpCpT1_RS06045	0.966
CpCpT1_RS01290	CpCpT1_RS02225	0.966
CpCpT1_RS09990	CpCpT1_RS01845	0.966
CpCpT1_RS05065	CpCpT1_RS03265	0.966
CpCpT1_RS03450	CpCpT1_RS01600	0.966
CpCpT1_RS04335	CpCpT1_RS03985	0.966
CpCpT1_RS07740	CpCpT1_RS05885	0.966
CpCpT1_RS00965	CpCpT1_RS08970	0.966
CpCpT1_RS05065	CpCpT1_RS01750	0.966
CpCpT1_RS03910	CpCpT1_RS08795	0.966
CpCpT1_RS04980	CpCpT1_RS03705	0.966
CpCpT1_RS05385	CpCpT1_RS09930	0.966
CpCpT1_RS10225	CpCpT1_RS05065	0.966
CpCpT1_RS03230	CpCpT1_RS07120	0.966
CpCpT1_RS08425	CpCpT1_RS10890	0.966
CpCpT1_RS06685	CpCpT1_RS05265	0.966
CpCpT1_RS06685	CpCpT1_RS02275	0.966
CpCpT1_RS07420	CpCpT1_RS00225	0.966
CpCpT1_RS09070	CpCpT1_RS09355	0.966
CpCpT1_RS02295	CpCpT1_RS08095	0.966
CpCpT1_RS10225	CpCpT1_RS07045	0.966
CpCpT1_RS03345	CpCpT1_RS08505	0.966
CpCpT1_RS03230	CpCpT1_RS03630	0.966
CpCpT1_RS02295	CpCpT1_RS07305	0.966
CpCpT1_RS04980	CpCpT1_RS08140	0.966
CpCpT1_RS04975	CpCpT1_RS06795	0.966
CpCpT1_RS09510	CpCpT1_RS07910	0.966
CpCpT1_RS05385	CpCpT1_RS01115	0.966
CpCpT1_RS09705	CpCpT1_RS01140	0.966
CpCpT1_RS02295	CpCpT1_RS01405	0.966
CpCpT1_RS01985	CpCpT1_RS05025	0.966
CpCpT1_RS09510	CpCpT1_RS01735	0.966
CpCpT1_RS07740	CpCpT1_RS09445	0.966
CpCpT1_RS04250	CpCpT1_RS09155	0.966
CpCpT1_RS01505	CpCpT1_RS08190	0.966
CpCpT1_RS04610	CpCpT1_RS03435	0.966
CpCpT1_RS02300	CpCpT1_RS01995	0.966
CpCpT1_RS09350	CpCpT1_RS07585	0.966
CpCpT1_RS02630	CpCpT1_RS00310	0.966
CpCpT1_RS09995	CpCpT1_RS03775	0.966
CpCpT1_RS06125	CpCpT1_RS04050	0.966
CpCpT1_RS02295	CpCpT1_RS01545	0.966
CpCpT1_RS04865	CpCpT1_RS10740	0.966
CpCpT1_RS02295	CpCpT1_RS00355	0.966
CpCpT1_RS02200	CpCpT1_RS00665	0.966
CpCpT1_RS05550	CpCpT1_RS04425	0.966
CpCpT1_RS01495	CpCpT1_RS02520	0.966
CpCpT1_RS09350	CpCpT1_RS07930	0.966
CpCpT1_RS03105	CpCpT1_RS03915	0.966
CpCpT1_RS03745	CpCpT1_RS09565	0.966
CpCpT1_RS03660	CpCpT1_RS01480	0.966
CpCpT1_RS03000	CpCpT1_RS00890	0.966
CpCpT1_RS03000	CpCpT1_RS08265	0.966
CpCpT1_RS08095	CpCpT1_RS03980	0.966
CpCpT1_RS10390	CpCpT1_RS03780	0.966
CpCpT1_RS05875	CpCpT1_RS06840	0.966
CpCpT1_RS06845	CpCpT1_RS00625	0.966
CpCpT1_RS08095	CpCpT1_RS02375	0.966
CpCpT1_RS09350	CpCpT1_RS00645	0.966
CpCpT1_RS06710	CpCpT1_RS05150	0.966
CpCpT1_RS03675	CpCpT1_RS05610	0.966
CpCpT1_RS04900	CpCpT1_RS09065	0.966
CpCpT1_RS02295	CpCpT1_RS07340	0.966
CpCpT1_RS01030	CpCpT1_RS04655	0.965
CpCpT1_RS01600	CpCpT1_RS06420	0.965
CpCpT1_RS02425	CpCpT1_RS10165	0.965
CpCpT1_RS01505	CpCpT1_RS00500	0.965
CpCpT1_RS03980	CpCpT1_RS07305	0.965
CpCpT1_RS00460	CpCpT1_RS02970	0.965
CpCpT1_RS05550	CpCpT1_RS05830	0.965
CpCpT1_RS05095	CpCpT1_RS00065	0.965
CpCpT1_RS08100	CpCpT1_RS10275	0.965
CpCpT1_RS03345	CpCpT1_RS03080	0.965
CpCpT1_RS07865	CpCpT1_RS04435	0.965
CpCpT1_RS09705	CpCpT1_RS00795	0.965
CpCpT1_RS09765	CpCpT1_RS01460	0.965
CpCpT1_RS04380	CpCpT1_RS04780	0.965
CpCpT1_RS03510	CpCpT1_RS10295	0.965
CpCpT1_RS10150	CpCpT1_RS05220	0.965
CpCpT1_RS03450	CpCpT1_RS10030	0.965
CpCpT1_RS01300	CpCpT1_RS03505	0.965
CpCpT1_RS01205	CpCpT1_RS10535	0.965
CpCpT1_RS01675	CpCpT1_RS00680	0.965
CpCpT1_RS01985	CpCpT1_RS05840	0.965
CpCpT1_RS01495	CpCpT1_RS05390	0.965
CpCpT1_RS03345	CpCpT1_RS07150	0.965
CpCpT1_RS00850	CpCpT1_RS00440	0.965
CpCpT1_RS03380	CpCpT1_RS05840	0.965
CpCpT1_RS10245	CpCpT1_RS00660	0.965
CpCpT1_RS04975	CpCpT1_RS06775	0.965
CpCpT1_RS03475	CpCpT1_RS01920	0.965
CpCpT1_RS09165	CpCpT1_RS05790	0.965
CpCpT1_RS07370	CpCpT1_RS07870	0.965
CpCpT1_RS09445	CpCpT1_RS00440	0.965
CpCpT1_RS08590	CpCpT1_RS01165	0.965
CpCpT1_RS00895	CpCpT1_RS08880	0.965
CpCpT1_RS07170	CpCpT1_RS01860	0.965
CpCpT1_RS07010	CpCpT1_RS06705	0.965
CpCpT1_RS01205	CpCpT1_RS00495	0.965
CpCpT1_RS04725	CpCpT1_RS05785	0.965
CpCpT1_RS01030	CpCpT1_RS03645	0.965
CpCpT1_RS03235	CpCpT1_RS07690	0.965
CpCpT1_RS07865	CpCpT1_RS09575	0.965
CpCpT1_RS01600	CpCpT1_RS01115	0.965
CpCpT1_RS09510	CpCpT1_RS02850	0.965
CpCpT1_RS04725	CpCpT1_RS10160	0.965
CpCpT1_RS02825	CpCpT1_RS10040	0.965
CpCpT1_RS05115	CpCpT1_RS02940	0.965
CpCpT1_RS00630	CpCpT1_RS06765	0.965
CpCpT1_RS09505	CpCpT1_RS00180	0.965
CpCpT1_RS02180	CpCpT1_RS02020	0.965
CpCpT1_RS02295	CpCpT1_RS08505	0.965
CpCpT1_RS02730	CpCpT1_RS07335	0.965
CpCpT1_RS09510	CpCpT1_RS09505	0.965
CpCpT1_RS07420	CpCpT1_RS07475	0.965
CpCpT1_RS08285	CpCpT1_RS08955	0.965
CpCpT1_RS06685	CpCpT1_RS10030	0.965
CpCpT1_RS08860	CpCpT1_RS09775	0.965
CpCpT1_RS07010	CpCpT1_RS06690	0.965
CpCpT1_RS08215	CpCpT1_RS01105	0.965
CpCpT1_RS09705	CpCpT1_RS09095	0.965
CpCpT1_RS05065	CpCpT1_RS05915	0.965
CpCpT1_RS00620	CpCpT1_RS09380	0.965
CpCpT1_RS07600	CpCpT1_RS09225	0.965
CpCpT1_RS09995	CpCpT1_RS00215	0.965
CpCpT1_RS09995	CpCpT1_RS00300	0.965
CpCpT1_RS03965	CpCpT1_RS02190	0.965
CpCpT1_RS01300	CpCpT1_RS02000	0.965
CpCpT1_RS07420	CpCpT1_RS10460	0.965
CpCpT1_RS02190	CpCpT1_RS08930	0.965
CpCpT1_RS08655	CpCpT1_RS00420	0.965
CpCpT1_RS06685	CpCpT1_RS07090	0.965
CpCpT1_RS07985	CpCpT1_RS06365	0.965
CpCpT1_RS03660	CpCpT1_RS06690	0.965
CpCpT1_RS10390	CpCpT1_RS08930	0.965
CpCpT1_RS06685	CpCpT1_RS07080	0.965
CpCpT1_RS03000	CpCpT1_RS00100	0.965
CpCpT1_RS01390	CpCpT1_RS04475	0.965
CpCpT1_RS04380	CpCpT1_RS08980	0.965
CpCpT1_RS01030	CpCpT1_RS08785	0.965
CpCpT1_RS02090	CpCpT1_RS02140	0.965
CpCpT1_RS09960	CpCpT1_RS06395	0.965
CpCpT1_RS05065	CpCpT1_RS08475	0.965
CpCpT1_RS09920	CpCpT1_RS03745	0.965
CpCpT1_RS03510	CpCpT1_RS01280	0.965
CpCpT1_RS04040	CpCpT1_RS01165	0.965
CpCpT1_RS03510	CpCpT1_RS04260	0.965
CpCpT1_RS00850	CpCpT1_RS08435	0.965
CpCpT1_RS03105	CpCpT1_RS09045	0.965
CpCpT1_RS06685	CpCpT1_RS03560	0.965
CpCpT1_RS03015	CpCpT1_RS03100	0.965
CpCpT1_RS08655	CpCpT1_RS08155	0.965
CpCpT1_RS01160	CpCpT1_RS00770	0.965
CpCpT1_RS03225	CpCpT1_RS04815	0.965
CpCpT1_RS03450	CpCpT1_RS06705	0.965
CpCpT1_RS02160	CpCpT1_RS06865	0.965
CpCpT1_RS06685	CpCpT1_RS02790	0.965
CpCpT1_RS07120	CpCpT1_RS05760	0.965
CpCpT1_RS08095	CpCpT1_RS01230	0.965
CpCpT1_RS03015	CpCpT1_RS03625	0.965
CpCpT1_RS01985	CpCpT1_RS05060	0.965
CpCpT1_RS01675	CpCpT1_RS06910	0.965
CpCpT1_RS03345	CpCpT1_RS00355	0.965
CpCpT1_RS09445	CpCpT1_RS01685	0.965
CpCpT1_RS05065	CpCpT1_RS04360	0.965
CpCpT1_RS03660	CpCpT1_RS00570	0.964
CpCpT1_RS04900	CpCpT1_RS00835	0.964
CpCpT1_RS00715	CpCpT1_RS04330	0.964
CpCpT1_RS03690	CpCpT1_RS06590	0.964
CpCpT1_RS03235	CpCpT1_RS08015	0.964
CpCpT1_RS02090	CpCpT1_RS02060	0.964
CpCpT1_RS05385	CpCpT1_RS00225	0.964
CpCpT1_RS02295	CpCpT1_RS02255	0.964
CpCpT1_RS00535	CpCpT1_RS03890	0.964
CpCpT1_RS02425	CpCpT1_RS09850	0.964
CpCpT1_RS07865	CpCpT1_RS05420	0.964
CpCpT1_RS05065	CpCpT1_RS03285	0.964
CpCpT1_RS06350	CpCpT1_RS04300	0.964
CpCpT1_RS05385	CpCpT1_RS02440	0.964
CpCpT1_RS07865	CpCpT1_RS01210	0.964
CpCpT1_RS08755	CpCpT1_RS05910	0.964
CpCpT1_RS06470	CpCpT1_RS06310	0.964
CpCpT1_RS04865	CpCpT1_RS00070	0.964
CpCpT1_RS09730	CpCpT1_RS10225	0.964
CpCpT1_RS07865	CpCpT1_RS03020	0.964
CpCpT1_RS01030	CpCpT1_RS09600	0.964
CpCpT1_RS05065	CpCpT1_RS07850	0.964
CpCpT1_RS05065	CpCpT1_RS02675	0.964
CpCpT1_RS10180	CpCpT1_RS04720	0.964
CpCpT1_RS03105	CpCpT1_RS02525	0.964
CpCpT1_RS07170	CpCpT1_RS07895	0.964
CpCpT1_RS06685	CpCpT1_RS10255	0.964
CpCpT1_RS02395	CpCpT1_RS00105	0.964
CpCpT1_RS02220	CpCpT1_RS02890	0.964
CpCpT1_RS02295	CpCpT1_RS06690	0.964
CpCpT1_RS08095	CpCpT1_RS07275	0.964
CpCpT1_RS06065	CpCpT1_RS05835	0.964
CpCpT1_RS00355	CpCpT1_RS10255	0.964
CpCpT1_RS09705	CpCpT1_RS07095	0.964
CpCpT1_RS03450	CpCpT1_RS05885	0.964
CpCpT1_RS06685	CpCpT1_RS03020	0.964
CpCpT1_RS05550	CpCpT1_RS04710	0.964
CpCpT1_RS06350	CpCpT1_RS09490	0.964
CpCpT1_RS05190	CpCpT1_RS01885	0.964
CpCpT1_RS01160	CpCpT1_RS00115	0.964
CpCpT1_RS03690	CpCpT1_RS07340	0.964
CpCpT1_RS00355	CpCpT1_RS07095	0.964
CpCpT1_RS03380	CpCpT1_RS08130	0.964
CpCpT1_RS06685	CpCpT1_RS06480	0.964
CpCpT1_RS00310	CpCpT1_RS04945	0.964
CpCpT1_RS02160	CpCpT1_RS01540	0.964
CpCpT1_RS02295	CpCpT1_RS00200	0.964
CpCpT1_RS08285	CpCpT1_RS02315	0.964
CpCpT1_RS06685	CpCpT1_RS04420	0.964
CpCpT1_RS01160	CpCpT1_RS03635	0.964
CpCpT1_RS07010	CpCpT1_RS00570	0.964
CpCpT1_RS10225	CpCpT1_RS03880	0.964
CpCpT1_RS08095	CpCpT1_RS00890	0.964
CpCpT1_RS09960	CpCpT1_RS01895	0.964
CpCpT1_RS06125	CpCpT1_RS06000	0.964
CpCpT1_RS05385	CpCpT1_RS03690	0.964
CpCpT1_RS03345	CpCpT1_RS07980	0.964
CpCpT1_RS01235	CpCpT1_RS04115	0.964
CpCpT1_RS10390	CpCpT1_RS05200	0.964
CpCpT1_RS03000	CpCpT1_RS03925	0.964
CpCpT1_RS02185	CpCpT1_RS06815	0.964
CpCpT1_RS03015	CpCpT1_RS07865	0.964
CpCpT1_RS08720	CpCpT1_RS07745	0.964
CpCpT1_RS02205	CpCpT1_RS07715	0.964
CpCpT1_RS02090	CpCpT1_RS07180	0.964
CpCpT1_RS07865	CpCpT1_RS09815	0.964
CpCpT1_RS01675	CpCpT1_RS03310	0.964
CpCpT1_RS03490	CpCpT1_RS03935	0.964
CpCpT1_RS01300	CpCpT1_RS00510	0.964
CpCpT1_RS06845	CpCpT1_RS06405	0.964
CpCpT1_RS10175	CpCpT1_RS09005	0.964
CpCpT1_RS03015	CpCpT1_RS06820	0.964
CpCpT1_RS05550	CpCpT1_RS04900	0.964
CpCpT1_RS09910	CpCpT1_RS09485	0.964
CpCpT1_RS03690	CpCpT1_RS06360	0.964
CpCpT1_RS03235	CpCpT1_RS07610	0.964
CpCpT1_RS00355	CpCpT1_RS07935	0.964
CpCpT1_RS05550	CpCpT1_RS01430	0.964
CpCpT1_RS07860	CpCpT1_RS05390	0.964
CpCpT1_RS00975	CpCpT1_RS05430	0.964
CpCpT1_RS09705	CpCpT1_RS00640	0.964
CpCpT1_RS09705	CpCpT1_RS00515	0.964
CpCpT1_RS00850	CpCpT1_RS02625	0.964
CpCpT1_RS00975	CpCpT1_RS06525	0.964
CpCpT1_RS01675	CpCpT1_RS00520	0.964
CpCpT1_RS03405	CpCpT1_RS07335	0.964
CpCpT1_RS01390	CpCpT1_RS05480	0.964
CpCpT1_RS03675	CpCpT1_RS03470	0.964
CpCpT1_RS09765	CpCpT1_RS05570	0.964
CpCpT1_RS01390	CpCpT1_RS06940	0.964
CpCpT1_RS03000	CpCpT1_RS03030	0.964
CpCpT1_RS03490	CpCpT1_RS02030	0.964
CpCpT1_RS04380	CpCpT1_RS01220	0.964
CpCpT1_RS01675	CpCpT1_RS03645	0.964
CpCpT1_RS00620	CpCpT1_RS08930	0.964
CpCpT1_RS02730	CpCpT1_RS03470	0.964
CpCpT1_RS00620	CpCpT1_RS05660	0.964
CpCpT1_RS07870	CpCpT1_RS07890	0.964
CpCpT1_RS02295	CpCpT1_RS00455	0.964
CpCpT1_RS03660	CpCpT1_RS07210	0.964
CpCpT1_RS03585	CpCpT1_RS09810	0.964
CpCpT1_RS04040	CpCpT1_RS05815	0.964
CpCpT1_RS02630	CpCpT1_RS02225	0.964
CpCpT1_RS02300	CpCpT1_RS02130	0.964
CpCpT1_RS09505	CpCpT1_RS02625	0.964
CpCpT1_RS06065	CpCpT1_RS01045	0.964
CpCpT1_RS09705	CpCpT1_RS08770	0.964
CpCpT1_RS08590	CpCpT1_RS08610	0.964
CpCpT1_RS04725	CpCpT1_RS09360	0.964
CpCpT1_RS01495	CpCpT1_RS02050	0.964
CpCpT1_RS03465	CpCpT1_RS01770	0.964
CpCpT1_RS06155	CpCpT1_RS09700	0.964
CpCpT1_RS03995	CpCpT1_RS08745	0.964
CpCpT1_RS03690	CpCpT1_RS07320	0.964
CpCpT1_RS04610	CpCpT1_RS08250	0.964
CpCpT1_RS03910	CpCpT1_RS09185	0.964
CpCpT1_RS01030	CpCpT1_RS08220	0.964
CpCpT1_RS08880	CpCpT1_RS06145	0.964
CpCpT1_RS08880	CpCpT1_RS06755	0.964
CpCpT1_RS03000	CpCpT1_RS06805	0.964
CpCpT1_RS01380	CpCpT1_RS07430	0.964
CpCpT1_RS10380	CpCpT1_RS08080	0.964
CpCpT1_RS04895	CpCpT1_RS02760	0.964
CpCpT1_RS02175	CpCpT1_RS02730	0.964
CpCpT1_RS02220	CpCpT1_RS10690	0.964
CpCpT1_RS03015	CpCpT1_RS01540	0.964
CpCpT1_RS00620	CpCpT1_RS01615	0.964
CpCpT1_RS10150	CpCpT1_RS05625	0.964
CpCpT1_RS10380	CpCpT1_RS04950	0.964
CpCpT1_RS02690	CpCpT1_RS00335	0.964
CpCpT1_RS02425	CpCpT1_RS06675	0.964
CpCpT1_RS05385	CpCpT1_RS10045	0.964
CpCpT1_RS01160	CpCpT1_RS02025	0.963
CpCpT1_RS01160	CpCpT1_RS01135	0.963
CpCpT1_RS05550	CpCpT1_RS01440	0.963
CpCpT1_RS10180	CpCpT1_RS09065	0.963
CpCpT1_RS05385	CpCpT1_RS06800	0.963
CpCpT1_RS07860	CpCpT1_RS01460	0.963
CpCpT1_RS03000	CpCpT1_RS00225	0.963
CpCpT1_RS06065	CpCpT1_RS03795	0.963
CpCpT1_RS10175	CpCpT1_RS01870	0.963
CpCpT1_RS02200	CpCpT1_RS09275	0.963
CpCpT1_RS09505	CpCpT1_RS03910	0.963
CpCpT1_RS07420	CpCpT1_RS00525	0.963
CpCpT1_RS06470	CpCpT1_RS07790	0.963
CpCpT1_RS07665	CpCpT1_RS02660	0.963
CpCpT1_RS06470	CpCpT1_RS04450	0.963
CpCpT1_RS02425	CpCpT1_RS03585	0.963
CpCpT1_RS04495	CpCpT1_RS10620	0.963
CpCpT1_RS02425	CpCpT1_RS03115	0.963
CpCpT1_RS02205	CpCpT1_RS02610	0.963
CpCpT1_RS05550	CpCpT1_RS07570	0.963
CpCpT1_RS06125	CpCpT1_RS07370	0.963
CpCpT1_RS09990	CpCpT1_RS02410	0.963
CpCpT1_RS04110	CpCpT1_RS00620	0.963
CpCpT1_RS03085	CpCpT1_RS01210	0.963
CpCpT1_RS06065	CpCpT1_RS04220	0.963
CpCpT1_RS07665	CpCpT1_RS06925	0.963
CpCpT1_RS02690	CpCpT1_RS00930	0.963
CpCpT1_RS03085	CpCpT1_RS05830	0.963
CpCpT1_RS05385	CpCpT1_RS08435	0.963
CpCpT1_RS07665	CpCpT1_RS08875	0.963
CpCpT1_RS03085	CpCpT1_RS09575	0.963
CpCpT1_RS06350	CpCpT1_RS05470	0.963
CpCpT1_RS03345	CpCpT1_RS03110	0.963
CpCpT1_RS09075	CpCpT1_RS01325	0.963
CpCpT1_RS02135	CpCpT1_RS02305	0.963
CpCpT1_RS03085	CpCpT1_RS04425	0.963
CpCpT1_RS04900	CpCpT1_RS00630	0.963
CpCpT1_RS05385	CpCpT1_RS07075	0.963
CpCpT1_RS05190	CpCpT1_RS01870	0.963
CpCpT1_RS09800	CpCpT1_RS09510	0.963
CpCpT1_RS01235	CpCpT1_RS07090	0.963
CpCpT1_RS03860	CpCpT1_RS07720	0.963
CpCpT1_RS01495	CpCpT1_RS07020	0.963
CpCpT1_RS06685	CpCpT1_RS07315	0.963
CpCpT1_RS09350	CpCpT1_RS09815	0.963
CpCpT1_RS03225	CpCpT1_RS04265	0.963
CpCpT1_RS00460	CpCpT1_RS10200	0.963
CpCpT1_RS08720	CpCpT1_RS07835	0.963
CpCpT1_RS00850	CpCpT1_RS04255	0.963
CpCpT1_RS03105	CpCpT1_RS07940	0.963
CpCpT1_RS03510	CpCpT1_RS00280	0.963
CpCpT1_RS02190	CpCpT1_RS03775	0.963
CpCpT1_RS03000	CpCpT1_RS08320	0.963
CpCpT1_RS03510	CpCpT1_RS06730	0.963
CpCpT1_RS05065	CpCpT1_RS01575	0.963
CpCpT1_RS00975	CpCpT1_RS06410	0.963
CpCpT1_RS09960	CpCpT1_RS05390	0.963
CpCpT1_RS09650	CpCpT1_RS09765	0.963
CpCpT1_RS07120	CpCpT1_RS08035	0.963
CpCpT1_RS02190	CpCpT1_RS04110	0.963
CpCpT1_RS00355	CpCpT1_RS00190	0.963
CpCpT1_RS06125	CpCpT1_RS09035	0.963
CpCpT1_RS04725	CpCpT1_RS08200	0.963
CpCpT1_RS05190	CpCpT1_RS07860	0.963
CpCpT1_RS03490	CpCpT1_RS08510	0.963
CpCpT1_RS04975	CpCpT1_RS07665	0.963
CpCpT1_RS02660	CpCpT1_RS03820	0.963
CpCpT1_RS01600	CpCpT1_RS01545	0.963
CpCpT1_RS07865	CpCpT1_RS10530	0.963
CpCpT1_RS04725	CpCpT1_RS06820	0.963
CpCpT1_RS01505	CpCpT1_RS03885	0.963
CpCpT1_RS04980	CpCpT1_RS09850	0.963
CpCpT1_RS04305	CpCpT1_RS03505	0.963
CpCpT1_RS10390	CpCpT1_RS01235	0.963
CpCpT1_RS00850	CpCpT1_RS08925	0.963
CpCpT1_RS06845	CpCpT1_RS00085	0.963
CpCpT1_RS03105	CpCpT1_RS06970	0.963
CpCpT1_RS04610	CpCpT1_RS07325	0.963
CpCpT1_RS03490	CpCpT1_RS01250	0.963
CpCpT1_RS02160	CpCpT1_RS02760	0.963
CpCpT1_RS09350	CpCpT1_RS07995	0.963
CpCpT1_RS04610	CpCpT1_RS04660	0.963
CpCpT1_RS06135	CpCpT1_RS00270	0.963
CpCpT1_RS09350	CpCpT1_RS07085	0.963
CpCpT1_RS00895	CpCpT1_RS02230	0.963
CpCpT1_RS09765	CpCpT1_RS10220	0.963
CpCpT1_RS03225	CpCpT1_RS06290	0.963
CpCpT1_RS09730	CpCpT1_RS09985	0.963
CpCpT1_RS09650	CpCpT1_RS06130	0.963
CpCpT1_RS00315	CpCpT1_RS06690	0.963
CpCpT1_RS02335	CpCpT1_RS04490	0.963
CpCpT1_RS01495	CpCpT1_RS00710	0.963
CpCpT1_RS02660	CpCpT1_RS08875	0.963
CpCpT1_RS08720	CpCpT1_RS06620	0.963
CpCpT1_RS03980	CpCpT1_RS08445	0.963
CpCpT1_RS02355	CpCpT1_RS01495	0.963
CpCpT1_RS03405	CpCpT1_RS05620	0.963
CpCpT1_RS10390	CpCpT1_RS08925	0.963
CpCpT1_RS10225	CpCpT1_RS05280	0.963
CpCpT1_RS00850	CpCpT1_RS06420	0.963
CpCpT1_RS10390	CpCpT1_RS04115	0.963
CpCpT1_RS10390	CpCpT1_RS06430	0.963
CpCpT1_RS09730	CpCpT1_RS04780	0.963
CpCpT1_RS00355	CpCpT1_RS01140	0.963
CpCpT1_RS05065	CpCpT1_RS07350	0.963
CpCpT1_RS06435	CpCpT1_RS01235	0.963
CpCpT1_RS10390	CpCpT1_RS02910	0.963
CpCpT1_RS09765	CpCpT1_RS02500	0.963
CpCpT1_RS00310	CpCpT1_RS06015	0.963
CpCpT1_RS08865	CpCpT1_RS08510	0.963
CpCpT1_RS03380	CpCpT1_RS06465	0.963
CpCpT1_RS09275	CpCpT1_RS02930	0.963
CpCpT1_RS04595	CpCpT1_RS05060	0.963
CpCpT1_RS03105	CpCpT1_RS10505	0.963
CpCpT1_RS09765	CpCpT1_RS01880	0.963
CpCpT1_RS01505	CpCpT1_RS08550	0.963
CpCpT1_RS02815	CpCpT1_RS08805	0.963
CpCpT1_RS03475	CpCpT1_RS00390	0.963
CpCpT1_RS05550	CpCpT1_RS03525	0.963
CpCpT1_RS04725	CpCpT1_RS10740	0.963
CpCpT1_RS04335	CpCpT1_RS05850	0.963
CpCpT1_RS02845	CpCpT1_RS06675	0.963
CpCpT1_RS07740	CpCpT1_RS03195	0.963
CpCpT1_RS05095	CpCpT1_RS04045	0.963
CpCpT1_RS09275	CpCpT1_RS02205	0.963
CpCpT1_RS09275	CpCpT1_RS06710	0.963
CpCpT1_RS01985	CpCpT1_RS01050	0.963
CpCpT1_RS00535	CpCpT1_RS07835	0.963
CpCpT1_RS03000	CpCpT1_RS10845	0.963
CpCpT1_RS01505	CpCpT1_RS05565	0.963
CpCpT1_RS08215	CpCpT1_RS04505	0.963
CpCpT1_RS05385	CpCpT1_RS03280	0.963
CpCpT1_RS08655	CpCpT1_RS00140	0.963
CpCpT1_RS09765	CpCpT1_RS07565	0.963
CpCpT1_RS05385	CpCpT1_RS01140	0.963
CpCpT1_RS01505	CpCpT1_RS06235	0.962
CpCpT1_RS05550	CpCpT1_RS05585	0.962
CpCpT1_RS08095	CpCpT1_RS05195	0.962
CpCpT1_RS07770	CpCpT1_RS04095	0.962
CpCpT1_RS09350	CpCpT1_RS03590	0.962
CpCpT1_RS07770	CpCpT1_RS08325	0.962
CpCpT1_RS05115	CpCpT1_RS04985	0.962
CpCpT1_RS01160	CpCpT1_RS08740	0.962
CpCpT1_RS02295	CpCpT1_RS03020	0.962
CpCpT1_RS09350	CpCpT1_RS08780	0.962
CpCpT1_RS04610	CpCpT1_RS07380	0.962
CpCpT1_RS10380	CpCpT1_RS04000	0.962
CpCpT1_RS03085	CpCpT1_RS05820	0.962
CpCpT1_RS04610	CpCpT1_RS06745	0.962
CpCpT1_RS00285	CpCpT1_RS07355	0.962
CpCpT1_RS09705	CpCpT1_RS05100	0.962
CpCpT1_RS03975	CpCpT1_RS01305	0.962
CpCpT1_RS00850	CpCpT1_RS00775	0.962
CpCpT1_RS00535	CpCpT1_RS10315	0.962
CpCpT1_RS05190	CpCpT1_RS09500	0.962
CpCpT1_RS06640	CpCpT1_RS03635	0.962
CpCpT1_RS09350	CpCpT1_RS02410	0.962
CpCpT1_RS09705	CpCpT1_RS01305	0.962
CpCpT1_RS05065	CpCpT1_RS04575	0.962
CpCpT1_RS01505	CpCpT1_RS06960	0.962
CpCpT1_RS05550	CpCpT1_RS04300	0.962
CpCpT1_RS10380	CpCpT1_RS09220	0.962
CpCpT1_RS06435	CpCpT1_RS00620	0.962
CpCpT1_RS08015	CpCpT1_RS02745	0.962
CpCpT1_RS00630	CpCpT1_RS01045	0.962
CpCpT1_RS07715	CpCpT1_RS04595	0.962
CpCpT1_RS02200	CpCpT1_RS09985	0.962
CpCpT1_RS02575	CpCpT1_RS07625	0.962
CpCpT1_RS09510	CpCpT1_RS01360	0.962
CpCpT1_RS03405	CpCpT1_RS00685	0.962
CpCpT1_RS01185	CpCpT1_RS06770	0.962
CpCpT1_RS06350	CpCpT1_RS01955	0.962
CpCpT1_RS06685	CpCpT1_RS02255	0.962
CpCpT1_RS05190	CpCpT1_RS08710	0.962
CpCpT1_RS09350	CpCpT1_RS05420	0.962
CpCpT1_RS05065	CpCpT1_RS05485	0.962
CpCpT1_RS09350	CpCpT1_RS02075	0.962
CpCpT1_RS10390	CpCpT1_RS06165	0.962
CpCpT1_RS02220	CpCpT1_RS05780	0.962
CpCpT1_RS01290	CpCpT1_RS04235	0.962
CpCpT1_RS07740	CpCpT1_RS02475	0.962
CpCpT1_RS07985	CpCpT1_RS10720	0.962
CpCpT1_RS01675	CpCpT1_RS04205	0.962
CpCpT1_RS01675	CpCpT1_RS01285	0.962
CpCpT1_RS06350	CpCpT1_RS03800	0.962
CpCpT1_RS03495	CpCpT1_RS06755	0.962
CpCpT1_RS03235	CpCpT1_RS06675	0.962
CpCpT1_RS01495	CpCpT1_RS04665	0.962
CpCpT1_RS04380	CpCpT1_RS07775	0.962
CpCpT1_RS06350	CpCpT1_RS04465	0.962
CpCpT1_RS08285	CpCpT1_RS02750	0.962
CpCpT1_RS10175	CpCpT1_RS06675	0.962
CpCpT1_RS08885	CpCpT1_RS06205	0.962
CpCpT1_RS07375	CpCpT1_RS00830	0.962
CpCpT1_RS10355	CpCpT1_RS02685	0.962
CpCpT1_RS03465	CpCpT1_RS08325	0.962
CpCpT1_RS02825	CpCpT1_RS09170	0.962
CpCpT1_RS03345	CpCpT1_RS09170	0.962
CpCpT1_RS03660	CpCpT1_RS01405	0.962
CpCpT1_RS03585	CpCpT1_RS05340	0.962
CpCpT1_RS03510	CpCpT1_RS01205	0.962
CpCpT1_RS03465	CpCpT1_RS03525	0.962
CpCpT1_RS05385	CpCpT1_RS10255	0.962
CpCpT1_RS02815	CpCpT1_RS00495	0.962
CpCpT1_RS06685	CpCpT1_RS00070	0.962
CpCpT1_RS05385	CpCpT1_RS06705	0.962
CpCpT1_RS03920	CpCpT1_RS08665	0.962
CpCpT1_RS01985	CpCpT1_RS06125	0.962
CpCpT1_RS10175	CpCpT1_RS01690	0.962
CpCpT1_RS02395	CpCpT1_RS01075	0.962
CpCpT1_RS04110	CpCpT1_RS01670	0.962
CpCpT1_RS05065	CpCpT1_RS02100	0.962
CpCpT1_RS09765	CpCpT1_RS07105	0.962
CpCpT1_RS06125	CpCpT1_RS07425	0.962
CpCpT1_RS03000	CpCpT1_RS10405	0.962
CpCpT1_RS10225	CpCpT1_RS06980	0.962
CpCpT1_RS05550	CpCpT1_RS08160	0.962
CpCpT1_RS05385	CpCpT1_RS00765	0.962
CpCpT1_RS05065	CpCpT1_RS08250	0.962
CpCpT1_RS08425	CpCpT1_RS09755	0.962
CpCpT1_RS07010	CpCpT1_RS00300	0.962
CpCpT1_RS09765	CpCpT1_RS07350	0.962
CpCpT1_RS02160	CpCpT1_RS08985	0.962
CpCpT1_RS02730	CpCpT1_RS05950	0.962
CpCpT1_RS08360	CpCpT1_RS03675	0.962
CpCpT1_RS03510	CpCpT1_RS05870	0.962
CpCpT1_RS04115	CpCpT1_RS01075	0.962
CpCpT1_RS03510	CpCpT1_RS02815	0.962
CpCpT1_RS06685	CpCpT1_RS07320	0.962
CpCpT1_RS00895	CpCpT1_RS03785	0.962
CpCpT1_RS01030	CpCpT1_RS07030	0.962
CpCpT1_RS03230	CpCpT1_RS09835	0.962
CpCpT1_RS07370	CpCpT1_RS07490	0.962
CpCpT1_RS05385	CpCpT1_RS01230	0.962
CpCpT1_RS05095	CpCpT1_RS02485	0.962
CpCpT1_RS01985	CpCpT1_RS06635	0.962
CpCpT1_RS01985	CpCpT1_RS01365	0.962
CpCpT1_RS07170	CpCpT1_RS05605	0.962
CpCpT1_RS04975	CpCpT1_RS02930	0.962
CpCpT1_RS01505	CpCpT1_RS08020	0.962
CpCpT1_RS04725	CpCpT1_RS07360	0.962
CpCpT1_RS03510	CpCpT1_RS04005	0.962
CpCpT1_RS10180	CpCpT1_RS05745	0.962
CpCpT1_RS03000	CpCpT1_RS02285	0.962
CpCpT1_RS10390	CpCpT1_RS00620	0.962
CpCpT1_RS01985	CpCpT1_RS06000	0.962
CpCpT1_RS03225	CpCpT1_RS07355	0.962
CpCpT1_RS04900	CpCpT1_RS08090	0.962
CpCpT1_RS05550	CpCpT1_RS04130	0.962
CpCpT1_RS04115	CpCpT1_RS09670	0.962
CpCpT1_RS03465	CpCpT1_RS04095	0.962
CpCpT1_RS05065	CpCpT1_RS05070	0.962
CpCpT1_RS08775	CpCpT1_RS06040	0.962
CpCpT1_RS03605	CpCpT1_RS04095	0.962
CpCpT1_RS03225	CpCpT1_RS05555	0.962
CpCpT1_RS02730	CpCpT1_RS10350	0.962
CpCpT1_RS06685	CpCpT1_RS10005	0.962
CpCpT1_RS03345	CpCpT1_RS00640	0.962
CpCpT1_RS09165	CpCpT1_RS01490	0.962
CpCpT1_RS02815	CpCpT1_RS08945	0.962
CpCpT1_RS10180	CpCpT1_RS04905	0.962
CpCpT1_RS09505	CpCpT1_RS08215	0.962
CpCpT1_RS00620	CpCpT1_RS01595	0.962
CpCpT1_RS08655	CpCpT1_RS08050	0.962
CpCpT1_RS03000	CpCpT1_RS10645	0.962
CpCpT1_RS03015	CpCpT1_RS06725	0.962
CpCpT1_RS02300	CpCpT1_RS10880	0.962
CpCpT1_RS00135	CpCpT1_RS06610	0.962
CpCpT1_RS08215	CpCpT1_RS00740	0.962
CpCpT1_RS09995	CpCpT1_RS03970	0.962
CpCpT1_RS08655	CpCpT1_RS10550	0.962
CpCpT1_RS08860	CpCpT1_RS00865	0.962
CpCpT1_RS02300	CpCpT1_RS03570	0.962
CpCpT1_RS06125	CpCpT1_RS10225	0.962
CpCpT1_RS06685	CpCpT1_RS03525	0.962
CpCpT1_RS01505	CpCpT1_RS02645	0.962
CpCpT1_RS07420	CpCpT1_RS01900	0.962
CpCpT1_RS03510	CpCpT1_RS00060	0.962
CpCpT1_RS10150	CpCpT1_RS06500	0.962
CpCpT1_RS01030	CpCpT1_RS07445	0.962
CpCpT1_RS02630	CpCpT1_RS03505	0.962
CpCpT1_RS04495	CpCpT1_RS09350	0.962
CpCpT1_RS02295	CpCpT1_RS08335	0.962
CpCpT1_RS05550	CpCpT1_RS03625	0.962
CpCpT1_RS03000	CpCpT1_RS09445	0.962
CpCpT1_RS10355	CpCpT1_RS02830	0.962
CpCpT1_RS00620	CpCpT1_RS09385	0.962
CpCpT1_RS00795	CpCpT1_RS07090	0.961
CpCpT1_RS01205	CpCpT1_RS06950	0.961
CpCpT1_RS03980	CpCpT1_RS06690	0.961
CpCpT1_RS08955	CpCpT1_RS09020	0.961
CpCpT1_RS03515	CpCpT1_RS00645	0.961
CpCpT1_RS08590	CpCpT1_RS06850	0.961
CpCpT1_RS03000	CpCpT1_RS04185	0.961
CpCpT1_RS10150	CpCpT1_RS02085	0.961
CpCpT1_RS08215	CpCpT1_RS06895	0.961
CpCpT1_RS09350	CpCpT1_RS08745	0.961
CpCpT1_RS03405	CpCpT1_RS09780	0.961
CpCpT1_RS10750	CpCpT1_RS04995	0.961
CpCpT1_RS02815	CpCpT1_RS01560	0.961
CpCpT1_RS01030	CpCpT1_RS05800	0.961
CpCpT1_RS00850	CpCpT1_RS01600	0.961
CpCpT1_RS07865	CpCpT1_RS04635	0.961
CpCpT1_RS07870	CpCpT1_RS05260	0.961
CpCpT1_RS00895	CpCpT1_RS03680	0.961
CpCpT1_RS03235	CpCpT1_RS09655	0.961
CpCpT1_RS04725	CpCpT1_RS07065	0.961
CpCpT1_RS04040	CpCpT1_RS07725	0.961
CpCpT1_RS09960	CpCpT1_RS10155	0.961
CpCpT1_RS01200	CpCpT1_RS10545	0.961
CpCpT1_RS02200	CpCpT1_RS01565	0.961
CpCpT1_RS04150	CpCpT1_RS09440	0.961
CpCpT1_RS03450	CpCpT1_RS03955	0.961
CpCpT1_RS07010	CpCpT1_RS03925	0.961
CpCpT1_RS08425	CpCpT1_RS00110	0.961
CpCpT1_RS10260	CpCpT1_RS08490	0.961
CpCpT1_RS05550	CpCpT1_RS03100	0.961
CpCpT1_RS10210	CpCpT1_RS05215	0.961
CpCpT1_RS04975	CpCpT1_RS08045	0.961
CpCpT1_RS03450	CpCpT1_RS01665	0.961
CpCpT1_RS03225	CpCpT1_RS07755	0.961
CpCpT1_RS10150	CpCpT1_RS01855	0.961
CpCpT1_RS06845	CpCpT1_RS01310	0.961
CpCpT1_RS08970	CpCpT1_RS08990	0.961
CpCpT1_RS04725	CpCpT1_RS00530	0.961
CpCpT1_RS05385	CpCpT1_RS08095	0.961
CpCpT1_RS09960	CpCpT1_RS06375	0.961
CpCpT1_RS02185	CpCpT1_RS09875	0.961
CpCpT1_RS02175	CpCpT1_RS00365	0.961
CpCpT1_RS08095	CpCpT1_RS01480	0.961
CpCpT1_RS05550	CpCpT1_RS04825	0.961
CpCpT1_RS05550	CpCpT1_RS02700	0.961
CpCpT1_RS01675	CpCpT1_RS05105	0.961
CpCpT1_RS09585	CpCpT1_RS09645	0.961
CpCpT1_RS00720	CpCpT1_RS10185	0.961
CpCpT1_RS01575	CpCpT1_RS09650	0.961
CpCpT1_RS00355	CpCpT1_RS03660	0.961
CpCpT1_RS03830	CpCpT1_RS09000	0.961
CpCpT1_RS09995	CpCpT1_RS00220	0.961
CpCpT1_RS00460	CpCpT1_RS02225	0.961
CpCpT1_RS10150	CpCpT1_RS06295	0.961
CpCpT1_RS00850	CpCpT1_RS01230	0.961
CpCpT1_RS08720	CpCpT1_RS01875	0.961
CpCpT1_RS10305	CpCpT1_RS05535	0.961
CpCpT1_RS08360	CpCpT1_RS00460	0.961
CpCpT1_RS05065	CpCpT1_RS04050	0.961
CpCpT1_RS02325	CpCpT1_RS06445	0.961
CpCpT1_RS06470	CpCpT1_RS10000	0.961
CpCpT1_RS05325	CpCpT1_RS02060	0.961
CpCpT1_RS04725	CpCpT1_RS01175	0.961
CpCpT1_RS07785	CpCpT1_RS04515	0.961
CpCpT1_RS09350	CpCpT1_RS05705	0.961
CpCpT1_RS03000	CpCpT1_RS02395	0.961
CpCpT1_RS06125	CpCpT1_RS09160	0.961
CpCpT1_RS01300	CpCpT1_RS02630	0.961
CpCpT1_RS02295	CpCpT1_RS00640	0.961
CpCpT1_RS08095	CpCpT1_RS02295	0.961
CpCpT1_RS10180	CpCpT1_RS06225	0.961
CpCpT1_RS10260	CpCpT1_RS09765	0.961
CpCpT1_RS04610	CpCpT1_RS06765	0.961
CpCpT1_RS10225	CpCpT1_RS02675	0.961
CpCpT1_RS00460	CpCpT1_RS07310	0.961
CpCpT1_RS01390	CpCpT1_RS05405	0.961
CpCpT1_RS03920	CpCpT1_RS10475	0.961
CpCpT1_RS05385	CpCpT1_RS03070	0.961
CpCpT1_RS10175	CpCpT1_RS00980	0.961
CpCpT1_RS02160	CpCpT1_RS00030	0.961
CpCpT1_RS09650	CpCpT1_RS10190	0.961
CpCpT1_RS02635	CpCpT1_RS06255	0.961
CpCpT1_RS08720	CpCpT1_RS09005	0.961
CpCpT1_RS06470	CpCpT1_RS09745	0.961
CpCpT1_RS09730	CpCpT1_RS10170	0.961
CpCpT1_RS02160	CpCpT1_RS09690	0.961
CpCpT1_RS07010	CpCpT1_RS07495	0.961
CpCpT1_RS03425	CpCpT1_RS03185	0.961
CpCpT1_RS10260	CpCpT1_RS08495	0.961
CpCpT1_RS03965	CpCpT1_RS07485	0.961
CpCpT1_RS06125	CpCpT1_RS07855	0.961
CpCpT1_RS04725	CpCpT1_RS03435	0.961
CpCpT1_RS05780	CpCpT1_RS01695	0.961
CpCpT1_RS07010	CpCpT1_RS05610	0.961
CpCpT1_RS10180	CpCpT1_RS07325	0.961
CpCpT1_RS09350	CpCpT1_RS10635	0.961
CpCpT1_RS04725	CpCpT1_RS04310	0.961
CpCpT1_RS05190	CpCpT1_RS09925	0.961
CpCpT1_RS03515	CpCpT1_RS04310	0.961
CpCpT1_RS06710	CpCpT1_RS00230	0.961
CpCpT1_RS03105	CpCpT1_RS07840	0.961
CpCpT1_RS04380	CpCpT1_RS03290	0.961
CpCpT1_RS07865	CpCpT1_RS10030	0.961
CpCpT1_RS02505	CpCpT1_RS09745	0.961
CpCpT1_RS04040	CpCpT1_RS10100	0.961
CpCpT1_RS05550	CpCpT1_RS10530	0.961
CpCpT1_RS03665	CpCpT1_RS02800	0.961
CpCpT1_RS10390	CpCpT1_RS05100	0.961
CpCpT1_RS02190	CpCpT1_RS01225	0.961
CpCpT1_RS03000	CpCpT1_RS03980	0.961
CpCpT1_RS09995	CpCpT1_RS07420	0.961
CpCpT1_RS05065	CpCpT1_RS00815	0.961
CpCpT1_RS06870	CpCpT1_RS06375	0.961
CpCpT1_RS07115	CpCpT1_RS00555	0.961
CpCpT1_RS06240	CpCpT1_RS05630	0.961
CpCpT1_RS03085	CpCpT1_RS09905	0.961
CpCpT1_RS06125	CpCpT1_RS05260	0.961
CpCpT1_RS03675	CpCpT1_RS05510	0.961
CpCpT1_RS04345	CpCpT1_RS07815	0.961
CpCpT1_RS03085	CpCpT1_RS06355	0.961
CpCpT1_RS05065	CpCpT1_RS06970	0.961
CpCpT1_RS08285	CpCpT1_RS03440	0.961
CpCpT1_RS06685	CpCpT1_RS06510	0.961
CpCpT1_RS06135	CpCpT1_RS00230	0.961
CpCpT1_RS09025	CpCpT1_RS05505	0.961
CpCpT1_RS01160	CpCpT1_RS10290	0.961
CpCpT1_RS02395	CpCpT1_RS01775	0.961
CpCpT1_RS03490	CpCpT1_RS04160	0.961
CpCpT1_RS09765	CpCpT1_RS10570	0.961
CpCpT1_RS02520	CpCpT1_RS08695	0.961
CpCpT1_RS06240	CpCpT1_RS05585	0.961
CpCpT1_RS03450	CpCpT1_RS00350	0.961
CpCpT1_RS00975	CpCpT1_RS02770	0.961
CpCpT1_RS03605	CpCpT1_RS00250	0.961
CpCpT1_RS02395	CpCpT1_RS08320	0.961
CpCpT1_RS01575	CpCpT1_RS02015	0.961
CpCpT1_RS03475	CpCpT1_RS10720	0.961
CpCpT1_RS05385	CpCpT1_RS03460	0.961
CpCpT1_RS03660	CpCpT1_RS00185	0.961
CpCpT1_RS09800	CpCpT1_RS05790	0.961
CpCpT1_RS01600	CpCpT1_RS00765	0.961
CpCpT1_RS07420	CpCpT1_RS08670	0.961
CpCpT1_RS07865	CpCpT1_RS02280	0.961
CpCpT1_RS06685	CpCpT1_RS10060	0.961
CpCpT1_RS03975	CpCpT1_RS03655	0.961
CpCpT1_RS05385	CpCpT1_RS08670	0.961
CpCpT1_RS02090	CpCpT1_RS09290	0.961
CpCpT1_RS10390	CpCpT1_RS04110	0.961
CpCpT1_RS00620	CpCpT1_RS09265	0.961
CpCpT1_RS09800	CpCpT1_RS04860	0.961
CpCpT1_RS04150	CpCpT1_RS00305	0.961
CpCpT1_RS04150	CpCpT1_RS10640	0.961
CpCpT1_RS00620	CpCpT1_RS08935	0.961
CpCpT1_RS06215	CpCpT1_RS01185	0.961
CpCpT1_RS04250	CpCpT1_RS07160	0.961
CpCpT1_RS01205	CpCpT1_RS04260	0.961
CpCpT1_RS03085	CpCpT1_RS04650	0.961
CpCpT1_RS00355	CpCpT1_RS08930	0.961
CpCpT1_RS03085	CpCpT1_RS02285	0.961
CpCpT1_RS01235	CpCpT1_RS08930	0.961
CpCpT1_RS03015	CpCpT1_RS05550	0.961
CpCpT1_RS05330	CpCpT1_RS08630	0.961
CpCpT1_RS05065	CpCpT1_RS09045	0.961
CpCpT1_RS06685	CpCpT1_RS03185	0.961
CpCpT1_RS10355	CpCpT1_RS03355	0.961
CpCpT1_RS10225	CpCpT1_RS10545	0.961
CpCpT1_RS05115	CpCpT1_RS09680	0.961
CpCpT1_RS02295	CpCpT1_RS10030	0.961
CpCpT1_RS00355	CpCpT1_RS02440	0.961
CpCpT1_RS07420	CpCpT1_RS06690	0.961
CpCpT1_RS03345	CpCpT1_RS07195	0.961
CpCpT1_RS08990	CpCpT1_RS09295	0.961
CpCpT1_RS03085	CpCpT1_RS05455	0.961
CpCpT1_RS00895	CpCpT1_RS08780	0.96
CpCpT1_RS07665	CpCpT1_RS00330	0.96
CpCpT1_RS00975	CpCpT1_RS07555	0.96
CpCpT1_RS09990	CpCpT1_RS04230	0.96
CpCpT1_RS05190	CpCpT1_RS09115	0.96
CpCpT1_RS03000	CpCpT1_RS04105	0.96
CpCpT1_RS05755	CpCpT1_RS08185	0.96
CpCpT1_RS05190	CpCpT1_RS08640	0.96
CpCpT1_RS03450	CpCpT1_RS10420	0.96
CpCpT1_RS10275	CpCpT1_RS03355	0.96
CpCpT1_RS03345	CpCpT1_RS09670	0.96
CpCpT1_RS08285	CpCpT1_RS06850	0.96
CpCpT1_RS00945	CpCpT1_RS02805	0.96
CpCpT1_RS08215	CpCpT1_RS09590	0.96
CpCpT1_RS05385	CpCpT1_RS01615	0.96
CpCpT1_RS09765	CpCpT1_RS10500	0.96
CpCpT1_RS09795	CpCpT1_RS07690	0.96
CpCpT1_RS02190	CpCpT1_RS01480	0.96
CpCpT1_RS01390	CpCpT1_RS04795	0.96
CpCpT1_RS10180	CpCpT1_RS01835	0.96
CpCpT1_RS00665	CpCpT1_RS00230	0.96
CpCpT1_RS02690	CpCpT1_RS07370	0.96
CpCpT1_RS01300	CpCpT1_RS10370	0.96
CpCpT1_RS05875	CpCpT1_RS00095	0.96
CpCpT1_RS06685	CpCpT1_RS00455	0.96
CpCpT1_RS04725	CpCpT1_RS10470	0.96
CpCpT1_RS03105	CpCpT1_RS05725	0.96
CpCpT1_RS07310	CpCpT1_RS02475	0.96
CpCpT1_RS07600	CpCpT1_RS08090	0.96
CpCpT1_RS00420	CpCpT1_RS06035	0.96
CpCpT1_RS01985	CpCpT1_RS02205	0.96
CpCpT1_RS02845	CpCpT1_RS09925	0.96
CpCpT1_RS09085	CpCpT1_RS00940	0.96
CpCpT1_RS08215	CpCpT1_RS08925	0.96
CpCpT1_RS02135	CpCpT1_RS05785	0.96
CpCpT1_RS06685	CpCpT1_RS01075	0.96
CpCpT1_RS08360	CpCpT1_RS10065	0.96
CpCpT1_RS05550	CpCpT1_RS05455	0.96
CpCpT1_RS09995	CpCpT1_RS00990	0.96
CpCpT1_RS10150	CpCpT1_RS09730	0.96
CpCpT1_RS03690	CpCpT1_RS03020	0.96
CpCpT1_RS09705	CpCpT1_RS01075	0.96
CpCpT1_RS10175	CpCpT1_RS06070	0.96
CpCpT1_RS06400	CpCpT1_RS00725	0.96
CpCpT1_RS03490	CpCpT1_RS06875	0.96
CpCpT1_RS09160	CpCpT1_RS08025	0.96
CpCpT1_RS09350	CpCpT1_RS01990	0.96
CpCpT1_RS07865	CpCpT1_RS10635	0.96
CpCpT1_RS10355	CpCpT1_RS05965	0.96
[truncated: 105,204 more rows]
