# Supplementary material for: Co-Expression Networks for Causal Gene Identification Based on RNA-seq Data of C<em>orynebacterium Pseudotuberculosis</em>
Source: Preprints.org preprint supplement (doi:10.20944/preprints202006.0144.v1), 2020-06-12
Supplement: Supplementary file 2 [file Datasheet2-Differential_expression _networks_all_strains.xlsx]

## Sheet: CP-13_DE_network
Gene1	Gene2	Value
CpCp13_RS02260	CpCp13_RS04105	0.89
CpCp13_RS02285	CpCp13_RS04110	0.877
CpCp13_RS02285	CpCp13_RS04105	0.872
CpCp13_RS02275	CpCp13_RS04110	0.862
CpCp13_RS02265	CpCp13_RS04105	0.858
CpCp13_RS02255	CpCp13_RS00295	0.857
CpCp13_RS01180	CpCp13_RS08860	0.856
CpCp13_RS02265	CpCp13_RS00295	0.854
CpCp13_RS04105	CpCp13_RS02285	0.848
CpCp13_RS02270	CpCp13_RS00295	0.847
CpCp13_RS02615	CpCp13_RS07315	0.847
CpCp13_RS03080	CpCp13_RS00450	0.84
CpCp13_RS02260	CpCp13_RS08860	0.839
CpCp13_RS02615	CpCp13_RS02610	0.835
CpCp13_RS02255	CpCp13_RS04115	0.835
CpCp13_RS02285	CpCp13_RS00450	0.835
CpCp13_RS02270	CpCp13_RS01235	0.834
CpCp13_RS02610	CpCp13_RS10635	0.833
CpCp13_RS03720	CpCp13_RS04110	0.831
CpCp13_RS02610	CpCp13_RS02615	0.831
CpCp13_RS02265	CpCp13_RS04110	0.829
CpCp13_RS02260	CpCp13_RS07090	0.829
CpCp13_RS02265	CpCp13_RS04115	0.827
CpCp13_RS03775	CpCp13_RS03995	0.826
CpCp13_RS04105	CpCp13_RS02265	0.825
CpCp13_RS02265	CpCp13_RS01235	0.825
CpCp13_RS02610	CpCp13_RS09955	0.824
CpCp13_RS02615	CpCp13_RS09955	0.824
CpCp13_RS02610	CpCp13_RS07315	0.823
CpCp13_RS03775	CpCp13_RS08505	0.819
CpCp13_RS02265	CpCp13_RS01225	0.819
CpCp13_RS02260	CpCp13_RS04110	0.816
CpCp13_RS04105	CpCp13_RS02260	0.816
CpCp13_RS02275	CpCp13_RS00295	0.816
CpCp13_RS02265	CpCp13_RS01230	0.815
CpCp13_RS03560	CpCp13_RS09955	0.812
CpCp13_RS02615	CpCp13_RS09900	0.811
CpCp13_RS02285	CpCp13_RS03715	0.808
CpCp13_RS08505	CpCp13_RS08860	0.806
CpCp13_RS02285	CpCp13_RS10635	0.806
CpCp13_RS02610	CpCp13_RS09900	0.805
CpCp13_RS03560	CpCp13_RS09900	0.802
CpCp13_RS02790	CpCp13_RS07080	0.802
CpCp13_RS03715	CpCp13_RS00295	0.801
CpCp13_RS03560	CpCp13_RS02790	0.8
CpCp13_RS02790	CpCp13_RS09955	0.8

## Sheet: CP-258_DE_network
Gene1	Gene2	Value
CP258_RS03835	CP258_RS08285	0.947
CP258_RS02710	CP258_RS03390	0.937
CP258_RS02710	CP258_RS09690	0.937
CP258_RS03855	CP258_RS00925	0.93
CP258_RS03755	CP258_RS08125	0.925
CP258_RS03390	CP258_RS09305	0.915
CP258_RS03745	CP258_RS00990	0.914
CP258_RS03835	CP258_RS04800	0.912
CP258_RS03755	CP258_RS09645	0.91
CP258_RS02745	CP258_RS01575	0.906
CP258_RS03805	CP258_RS01900	0.905
CP258_RS03805	CP258_RS02710	0.903
CP258_RS02905	CP258_RS10385	0.903
CP258_RS03805	CP258_RS01575	0.903
CP258_RS05175	CP258_RS06185	0.902
CP258_RS02905	CP258_RS08335	0.902
CP258_RS05395	CP258_RS01735	0.9
CP258_RS03930	CP258_RS01735	0.899
CP258_RS02810	CP258_RS03905	0.899
CP258_RS02810	CP258_RS09815	0.899
CP258_RS02710	CP258_RS06280	0.899
CP258_RS02905	CP258_RS00985	0.899
CP258_RS03205	CP258_RS02235	0.898
CP258_RS03390	CP258_RS10245	0.897
CP258_RS02710	CP258_RS03805	0.896
CP258_RS03835	CP258_RS07705	0.896
CP258_RS02745	CP258_RS02710	0.895
CP258_RS05175	CP258_RS06325	0.895
CP258_RS02710	CP258_RS06835	0.894
CP258_RS02465	CP258_RS00925	0.893
CP258_RS05175	CP258_RS09640	0.893
CP258_RS02810	CP258_RS10245	0.892
CP258_RS02710	CP258_RS09620	0.892
CP258_RS05175	CP258_RS00255	0.892
CP258_RS04800	CP258_RS00985	0.892
CP258_RS03205	CP258_RS01640	0.891
CP258_RS02810	CP258_RS08025	0.891
CP258_RS02905	CP258_RS00440	0.89
CP258_RS02905	CP258_RS04575	0.889
CP258_RS03835	CP258_RS00830	0.889
CP258_RS02905	CP258_RS06185	0.889
CP258_RS02810	CP258_RS10160	0.887
CP258_RS03930	CP258_RS03205	0.887
CP258_RS05445	CP258_RS01735	0.887
CP258_RS02710	CP258_RS00865	0.885
CP258_RS02685	CP258_RS09920	0.885
CP258_RS02745	CP258_RS01890	0.885
CP258_RS05445	CP258_RS10230	0.884
CP258_RS05505	CP258_RS01735	0.884
CP258_RS02810	CP258_RS10685	0.882
CP258_RS05175	CP258_RS04575	0.881
CP258_RS05395	CP258_RS02080	0.88
CP258_RS05395	CP258_RS10230	0.88
CP258_RS05395	CP258_RS03205	0.88
CP258_RS03390	CP258_RS01900	0.879
CP258_RS02745	CP258_RS01900	0.879
CP258_RS05575	CP258_RS00830	0.879
CP258_RS05175	CP258_RS10505	0.879
CP258_RS03105	CP258_RS06235	0.879
CP258_RS05175	CP258_RS10385	0.878
CP258_RS02710	CP258_RS09625	0.878
CP258_RS02905	CP258_RS00255	0.878
CP258_RS03835	CP258_RS01920	0.878
CP258_RS03105	CP258_RS09100	0.878
CP258_RS06280	CP258_RS01575	0.878
CP258_RS02810	CP258_RS04800	0.877
CP258_RS00985	CP258_RS00830	0.877
CP258_RS03855	CP258_RS00255	0.877
CP258_RS03065	CP258_RS09920	0.877
CP258_RS02905	CP258_RS06325	0.876
CP258_RS06280	CP258_RS01900	0.875
CP258_RS02810	CP258_RS07920	0.875
CP258_RS03930	CP258_RS03105	0.874
CP258_RS04575	CP258_RS08285	0.873
CP258_RS03930	CP258_RS00460	0.873
CP258_RS03905	CP258_RS09920	0.873
CP258_RS03745	CP258_RS05110	0.873
CP258_RS05395	CP258_RS10305	0.872
CP258_RS04655	CP258_RS08125	0.872
CP258_RS02710	CP258_RS02745	0.872
CP258_RS03835	CP258_RS05175	0.872
CP258_RS02995	CP258_RS02810	0.871
CP258_RS03390	CP258_RS08765	0.871
CP258_RS02685	CP258_RS09690	0.871
CP258_RS03755	CP258_RS06830	0.87
CP258_RS05395	CP258_RS00460	0.87
CP258_RS02810	CP258_RS08070	0.869
CP258_RS00925	CP258_RS06720	0.868
CP258_RS03105	CP258_RS00990	0.868
CP258_RS03065	CP258_RS05575	0.868
CP258_RS04575	CP258_RS09610	0.868
CP258_RS03835	CP258_RS03905	0.868
CP258_RS03755	CP258_RS09480	0.867
CP258_RS01920	CP258_RS03835	0.867
CP258_RS02995	CP258_RS00985	0.867
CP258_RS03390	CP258_RS10685	0.866
CP258_RS05445	CP258_RS10305	0.866
CP258_RS03105	CP258_RS03930	0.866
CP258_RS05395	CP258_RS03105	0.865
CP258_RS02710	CP258_RS04220	0.865
CP258_RS03930	CP258_RS10305	0.865
CP258_RS03930	CP258_RS02080	0.864
CP258_RS00255	CP258_RS00060	0.864
CP258_RS03745	CP258_RS00060	0.864
CP258_RS05175	CP258_RS10200	0.863
CP258_RS02810	CP258_RS08285	0.863
CP258_RS03105	CP258_RS07770	0.863
CP258_RS02465	CP258_RS06905	0.862
CP258_RS00830	CP258_RS00985	0.862
CP258_RS04220	CP258_RS01575	0.862
CP258_RS02810	CP258_RS02995	0.862
CP258_RS04800	CP258_RS05575	0.861
CP258_RS03105	CP258_RS00505	0.861
CP258_RS04215	CP258_RS10230	0.861
CP258_RS02810	CP258_RS03065	0.861
CP258_RS03390	CP258_RS09815	0.861
CP258_RS05445	CP258_RS10235	0.86
CP258_RS02810	CP258_RS10585	0.86
CP258_RS05445	CP258_RS03205	0.86
CP258_RS04800	CP258_RS02810	0.859
CP258_RS05505	CP258_RS03205	0.859
CP258_RS02905	CP258_RS09760	0.859
CP258_RS05575	CP258_RS02995	0.859
CP258_RS02710	CP258_RS06660	0.859
CP258_RS02905	CP258_RS01760	0.859
CP258_RS05175	CP258_RS08335	0.858
CP258_RS02750	CP258_RS00990	0.858
CP258_RS03390	CP258_RS08470	0.858
CP258_RS02710	CP258_RS05395	0.858
CP258_RS02810	CP258_RS02905	0.858
CP258_RS05445	CP258_RS03105	0.857
CP258_RS00520	CP258_RS09645	0.856
CP258_RS03105	CP258_RS02235	0.856
CP258_RS01735	CP258_RS06580	0.856
CP258_RS01735	CP258_RS05505	0.856
CP258_RS03755	CP258_RS02365	0.856
CP258_RS00830	CP258_RS05575	0.856
CP258_RS01735	CP258_RS07770	0.856
CP258_RS02685	CP258_RS00865	0.856
CP258_RS05110	CP258_RS03745	0.856
CP258_RS04800	CP258_RS08445	0.855
CP258_RS06235	CP258_RS03105	0.855
CP258_RS03805	CP258_RS02080	0.855
CP258_RS01920	CP258_RS09640	0.855
CP258_RS02710	CP258_RS09845	0.855
CP258_RS06235	CP258_RS06905	0.855
CP258_RS03805	CP258_RS03205	0.854
CP258_RS01735	CP258_RS09100	0.854
CP258_RS03910	CP258_RS09620	0.854
CP258_RS02745	CP258_RS02080	0.853
CP258_RS05110	CP258_RS00255	0.853
CP258_RS03390	CP258_RS03905	0.853
CP258_RS00925	CP258_RS03855	0.852
CP258_RS02710	CP258_RS02210	0.852
CP258_RS02710	CP258_RS08185	0.852
CP258_RS02685	CP258_RS05575	0.852
CP258_RS01735	CP258_RS05445	0.852
CP258_RS05395	CP258_RS01890	0.851
CP258_RS02745	CP258_RS01735	0.851
CP258_RS01760	CP258_RS07255	0.851
CP258_RS03390	CP258_RS07920	0.851
CP258_RS03835	CP258_RS10245	0.851
CP258_RS02685	CP258_RS00985	0.851
CP258_RS01735	CP258_RS08600	0.85
CP258_RS01760	CP258_RS00060	0.85

## Sheet: CP-1002_DE_network
Gene1	Gene2	Value
Cp1002B_RS03055	Cp1002B_RS04580	0.943
Cp1002B_RS03055	Cp1002B_RS05020	0.938
Cp1002B_RS03075	Cp1002B_RS03055	0.931
Cp1002B_RS03075	Cp1002B_RS03015	0.927
Cp1002B_RS02880	Cp1002B_RS02580	0.924
Cp1002B_RS03055	Cp1002B_RS03075	0.922
Cp1002B_RS03075	Cp1002B_RS05305	0.922
Cp1002B_RS02880	Cp1002B_RS05690	0.922
Cp1002B_RS02880	Cp1002B_RS06870	0.921
Cp1002B_RS02880	Cp1002B_RS09295	0.92
Cp1002B_RS04580	Cp1002B_RS05305	0.918
Cp1002B_RS03070	Cp1002B_RS10720	0.918
Cp1002B_RS03180	Cp1002B_RS08015	0.918
Cp1002B_RS04495	Cp1002B_RS07605	0.917
Cp1002B_RS04580	Cp1002B_RS09825	0.915
Cp1002B_RS04495	Cp1002B_RS05005	0.913
Cp1002B_RS03075	Cp1002B_RS06210	0.913
Cp1002B_RS02880	Cp1002B_RS00205	0.91
Cp1002B_RS04655	Cp1002B_RS01480	0.91
Cp1002B_RS04655	Cp1002B_RS02920	0.909
Cp1002B_RS02915	Cp1002B_RS01800	0.909
Cp1002B_RS02880	Cp1002B_RS08575	0.907
Cp1002B_RS02880	Cp1002B_RS06300	0.907
Cp1002B_RS03180	Cp1002B_RS04480	0.907
Cp1002B_RS03520	Cp1002B_RS10230	0.906
Cp1002B_RS03455	Cp1002B_RS08490	0.906
Cp1002B_RS03455	Cp1002B_RS05005	0.905
Cp1002B_RS02880	Cp1002B_RS00885	0.905
Cp1002B_RS03045	Cp1002B_RS09275	0.904
Cp1002B_RS03075	Cp1002B_RS09825	0.904
Cp1002B_RS03355	Cp1002B_RS01805	0.903
Cp1002B_RS03070	Cp1002B_RS01805	0.903
Cp1002B_RS04495	Cp1002B_RS01305	0.902
Cp1002B_RS03505	Cp1002B_RS06735	0.902
Cp1002B_RS03075	Cp1002B_RS00340	0.902
Cp1002B_RS04480	Cp1002B_RS03180	0.901
Cp1002B_RS00890	Cp1002B_RS01480	0.901
Cp1002B_RS03045	Cp1002B_RS05530	0.9
Cp1002B_RS03455	Cp1002B_RS10185	0.9
Cp1002B_RS03455	Cp1002B_RS10100	0.899
Cp1002B_RS04580	Cp1002B_RS03055	0.899
Cp1002B_RS02905	Cp1002B_RS08460	0.898
Cp1002B_RS03070	Cp1002B_RS03455	0.897
Cp1002B_RS02920	Cp1002B_RS09235	0.896
Cp1002B_RS04495	Cp1002B_RS10360	0.895
Cp1002B_RS03510	Cp1002B_RS01805	0.895
Cp1002B_RS02920	Cp1002B_RS06425	0.894
Cp1002B_RS02880	Cp1002B_RS10150	0.894
Cp1002B_RS00890	Cp1002B_RS02920	0.894
Cp1002B_RS02880	Cp1002B_RS07010	0.894
Cp1002B_RS02920	Cp1002B_RS06690	0.894
Cp1002B_RS04580	Cp1002B_RS06210	0.893
Cp1002B_RS04495	Cp1002B_RS06870	0.893
Cp1002B_RS03625	Cp1002B_RS02515	0.893
Cp1002B_RS03455	Cp1002B_RS05990	0.892
Cp1002B_RS03505	Cp1002B_RS10235	0.892
Cp1002B_RS02920	Cp1002B_RS08020	0.892
Cp1002B_RS03075	Cp1002B_RS02905	0.891
Cp1002B_RS02880	Cp1002B_RS03620	0.891
Cp1002B_RS04480	Cp1002B_RS08495	0.89
Cp1002B_RS03070	Cp1002B_RS02515	0.89
Cp1002B_RS00730	Cp1002B_RS08575	0.89
Cp1002B_RS02920	Cp1002B_RS00890	0.889
Cp1002B_RS02920	Cp1002B_RS01545	0.889
Cp1002B_RS04480	Cp1002B_RS00450	0.887
Cp1002B_RS03070	Cp1002B_RS04495	0.887
Cp1002B_RS04580	Cp1002B_RS10240	0.887
Cp1002B_RS04480	Cp1002B_RS02905	0.886
Cp1002B_RS03510	Cp1002B_RS10720	0.886
Cp1002B_RS00730	Cp1002B_RS09295	0.886
Cp1002B_RS04835	Cp1002B_RS02515	0.886
Cp1002B_RS02905	Cp1002B_RS08015	0.886
Cp1002B_RS00730	Cp1002B_RS10100	0.884
Cp1002B_RS02880	Cp1002B_RS07605	0.883
Cp1002B_RS03455	Cp1002B_RS03510	0.883
Cp1002B_RS03045	Cp1002B_RS06380	0.882
Cp1002B_RS02880	Cp1002B_RS03070	0.882
Cp1002B_RS03625	Cp1002B_RS06735	0.881
Cp1002B_RS03505	Cp1002B_RS08355	0.88
Cp1002B_RS04495	Cp1002B_RS10185	0.88
Cp1002B_RS02920	Cp1002B_RS00435	0.879
Cp1002B_RS03625	Cp1002B_RS08355	0.879
Cp1002B_RS04495	Cp1002B_RS09720	0.879
Cp1002B_RS03180	Cp1002B_RS08460	0.879
Cp1002B_RS04495	Cp1002B_RS00885	0.879
Cp1002B_RS02905	Cp1002B_RS01525	0.879
Cp1002B_RS02920	Cp1002B_RS05385	0.879
Cp1002B_RS03070	Cp1002B_RS03510	0.878
Cp1002B_RS02880	Cp1002B_RS03510	0.877
Cp1002B_RS03070	Cp1002B_RS00885	0.876
Cp1002B_RS00290	Cp1002B_RS08355	0.876
Cp1002B_RS04495	Cp1002B_RS04060	0.876
Cp1002B_RS02920	Cp1002B_RS10820	0.876
Cp1002B_RS02905	Cp1002B_RS04480	0.875
Cp1002B_RS03075	Cp1002B_RS10240	0.875
Cp1002B_RS02835	Cp1002B_RS03520	0.874
Cp1002B_RS03045	Cp1002B_RS03635	0.873
Cp1002B_RS04495	Cp1002B_RS03070	0.873
Cp1002B_RS00885	Cp1002B_RS01805	0.872
Cp1002B_RS04480	Cp1002B_RS01535	0.872
Cp1002B_RS01805	Cp1002B_RS01305	0.872
Cp1002B_RS03455	Cp1002B_RS09720	0.871
Cp1002B_RS04495	Cp1002B_RS03510	0.871
Cp1002B_RS02880	Cp1002B_RS10100	0.87
Cp1002B_RS03455	Cp1002B_RS04060	0.87
Cp1002B_RS02920	Cp1002B_RS04955	0.87
Cp1002B_RS03455	Cp1002B_RS09295	0.869
Cp1002B_RS03045	Cp1002B_RS10820	0.869
Cp1002B_RS03045	Cp1002B_RS06770	0.869
Cp1002B_RS03045	Cp1002B_RS06425	0.869
Cp1002B_RS02905	Cp1002B_RS03075	0.868
Cp1002B_RS03045	Cp1002B_RS06690	0.868
Cp1002B_RS00290	Cp1002B_RS10235	0.868
Cp1002B_RS03045	Cp1002B_RS05960	0.868
Cp1002B_RS02515	Cp1002B_RS00200	0.867
Cp1002B_RS02905	Cp1002B_RS05020	0.867
Cp1002B_RS03045	Cp1002B_RS09235	0.867
Cp1002B_RS02920	Cp1002B_RS05530	0.867
Cp1002B_RS04480	Cp1002B_RS00845	0.866
Cp1002B_RS04495	Cp1002B_RS04795	0.866
Cp1002B_RS04835	Cp1002B_RS06735	0.865
Cp1002B_RS03075	Cp1002B_RS00450	0.865
Cp1002B_RS03070	Cp1002B_RS07010	0.864
Cp1002B_RS02920	Cp1002B_RS04655	0.863
Cp1002B_RS04480	Cp1002B_RS00650	0.862
Cp1002B_RS03505	Cp1002B_RS01045	0.861
Cp1002B_RS03045	Cp1002B_RS02810	0.861
Cp1002B_RS01805	Cp1002B_RS00885	0.861
Cp1002B_RS03510	Cp1002B_RS04495	0.859
Cp1002B_RS02920	Cp1002B_RS02045	0.859
Cp1002B_RS02920	Cp1002B_RS00895	0.859
Cp1002B_RS00815	Cp1002B_RS01665	0.859
Cp1002B_RS03455	Cp1002B_RS08575	0.858
Cp1002B_RS04480	Cp1002B_RS01835	0.857
Cp1002B_RS01810	Cp1002B_RS00845	0.857
Cp1002B_RS00360	Cp1002B_RS01810	0.856
Cp1002B_RS02905	Cp1002B_RS01810	0.856
Cp1002B_RS00730	Cp1002B_RS00885	0.855
Cp1002B_RS04495	Cp1002B_RS02640	0.855
Cp1002B_RS01830	Cp1002B_RS06375	0.855
Cp1002B_RS00885	Cp1002B_RS10720	0.855
Cp1002B_RS04480	Cp1002B_RS09915	0.854
Cp1002B_RS02515	Cp1002B_RS00290	0.854
Cp1002B_RS03455	Cp1002B_RS07605	0.853
Cp1002B_RS02880	Cp1002B_RS10360	0.853
Cp1002B_RS00845	Cp1002B_RS01810	0.852
Cp1002B_RS00205	Cp1002B_RS02515	0.852
Cp1002B_RS03355	Cp1002B_RS01810	0.852
Cp1002B_RS00890	Cp1002B_RS01800	0.851
Cp1002B_RS01810	Cp1002B_RS05070	0.851
Cp1002B_RS03075	Cp1002B_RS04860	0.851
Cp1002B_RS03520	Cp1002B_RS06280	0.851
Cp1002B_RS02810	Cp1002B_RS05230	0.85
Cp1002B_RS00390	Cp1002B_RS06480	0.85
Cp1002B_RS03625	Cp1002B_RS10235	0.85

## Sheet: CP-T1_DE_network
Gene1	Gene2	Value
CpCpT1_RS02380	CpCpT1_RS07365	0.884
CpCpT1_RS02380	CpCpT1_RS02285	0.884
CpCpT1_RS02380	CpCpT1_RS01180	0.884
CpCpT1_RS02910	CpCpT1_RS01230	0.879
CpCpT1_RS02380	CpCpT1_RS04425	0.877
CpCpT1_RS02790	CpCpT1_RS05380	0.874
CpCpT1_RS02375	CpCpT1_RS03075	0.873
CpCpT1_RS02285	CpCpT1_RS02380	0.87
CpCpT1_RS02270	CpCpT1_RS04105	0.868
CpCpT1_RS02790	CpCpT1_RS02400	0.868
CpCpT1_RS04110	CpCpT1_RS02910	0.865
CpCpT1_RS03560	CpCpT1_RS07530	0.863
CpCpT1_RS02380	CpCpT1_RS07320	0.861
CpCpT1_RS02910	CpCpT1_RS04110	0.859
CpCpT1_RS04105	CpCpT1_RS09905	0.859
CpCpT1_RS02910	CpCpT1_RS01235	0.857
CpCpT1_RS02380	CpCpT1_RS10645	0.857
CpCpT1_RS02910	CpCpT1_RS01615	0.856
CpCpT1_RS02380	CpCpT1_RS02260	0.856
CpCpT1_RS02380	CpCpT1_RS07865	0.855
CpCpT1_RS02380	CpCpT1_RS10005	0.855
CpCpT1_RS02280	CpCpT1_RS04105	0.853
CpCpT1_RS02270	CpCpT1_RS03205	0.852
CpCpT1_RS02380	CpCpT1_RS02255	0.852
CpCpT1_RS02270	CpCpT1_RS07530	0.852
CpCpT1_RS02790	CpCpT1_RS07530	0.849
CpCpT1_RS02790	CpCpT1_RS02380	0.847
CpCpT1_RS02380	CpCpT1_RS10010	0.847
CpCpT1_RS03205	CpCpT1_RS03560	0.846
CpCpT1_RS02380	CpCpT1_RS01455	0.845
CpCpT1_RS02380	CpCpT1_RS08080	0.845
CpCpT1_RS04110	CpCpT1_RS03070	0.845
CpCpT1_RS02265	CpCpT1_RS07530	0.845
CpCpT1_RS02910	CpCpT1_RS02295	0.844
CpCpT1_RS01230	CpCpT1_RS02910	0.843
CpCpT1_RS02910	CpCpT1_RS01595	0.841
CpCpT1_RS02380	CpCpT1_RS10740	0.84
CpCpT1_RS02280	CpCpT1_RS03205	0.84
CpCpT1_RS02295	CpCpT1_RS07275	0.839
CpCpT1_RS02380	CpCpT1_RS09900	0.838
CpCpT1_RS02400	CpCpT1_RS02790	0.838
CpCpT1_RS02895	CpCpT1_RS03720	0.835
CpCpT1_RS01235	CpCpT1_RS02910	0.834
CpCpT1_RS02265	CpCpT1_RS02380	0.833
CpCpT1_RS04105	CpCpT1_RS10530	0.833
CpCpT1_RS02400	CpCpT1_RS09900	0.832
CpCpT1_RS04105	CpCpT1_RS07315	0.832
CpCpT1_RS02895	CpCpT1_RS03205	0.832
CpCpT1_RS02910	CpCpT1_RS10255	0.831
CpCpT1_RS02380	CpCpT1_RS02790	0.83
CpCpT1_RS02380	CpCpT1_RS02280	0.83
CpCpT1_RS02380	CpCpT1_RS08075	0.829
CpCpT1_RS04105	CpCpT1_RS10010	0.829
CpCpT1_RS02380	CpCpT1_RS10530	0.829
CpCpT1_RS02375	CpCpT1_RS07275	0.827
CpCpT1_RS02910	CpCpT1_RS09590	0.826
CpCpT1_RS02895	CpCpT1_RS07530	0.826
CpCpT1_RS02380	CpCpT1_RS02275	0.825
CpCpT1_RS02295	CpCpT1_RS02910	0.825
CpCpT1_RS02280	CpCpT1_RS07765	0.824
CpCpT1_RS02910	CpCpT1_RS00620	0.824
CpCpT1_RS03720	CpCpT1_RS10635	0.823
CpCpT1_RS01225	CpCpT1_RS10010	0.822
CpCpT1_RS02895	CpCpT1_RS04110	0.822
CpCpT1_RS02910	CpCpT1_RS08335	0.821
CpCpT1_RS02910	CpCpT1_RS08935	0.819
CpCpT1_RS00890	CpCpT1_RS07275	0.819
CpCpT1_RS02295	CpCpT1_RS03075	0.819
CpCpT1_RS02910	CpCpT1_RS01035	0.818
CpCpT1_RS04105	CpCpT1_RS09900	0.818
CpCpT1_RS02265	CpCpT1_RS04110	0.817
CpCpT1_RS02910	CpCpT1_RS10090	0.817
CpCpT1_RS02400	CpCpT1_RS02275	0.815
CpCpT1_RS02910	CpCpT1_RS05380	0.815
CpCpT1_RS02285	CpCpT1_RS02400	0.813
CpCpT1_RS02400	CpCpT1_RS02285	0.812
CpCpT1_RS02285	CpCpT1_RS04110	0.812
CpCpT1_RS03560	CpCpT1_RS03205	0.811
CpCpT1_RS02285	CpCpT1_RS01230	0.811
CpCpT1_RS02380	CpCpT1_RS10410	0.81
CpCpT1_RS02295	CpCpT1_RS01605	0.81
CpCpT1_RS02295	CpCpT1_RS01230	0.809
CpCpT1_RS04110	CpCpT1_RS02285	0.809
CpCpT1_RS02265	CpCpT1_RS10635	0.808
CpCpT1_RS02910	CpCpT1_RS01605	0.808
CpCpT1_RS02295	CpCpT1_RS00570	0.807
CpCpT1_RS01035	CpCpT1_RS08505	0.807
CpCpT1_RS00570	CpCpT1_RS02260	0.806
CpCpT1_RS03205	CpCpT1_RS02265	0.806
CpCpT1_RS02280	CpCpT1_RS02380	0.806
CpCpT1_RS02295	CpCpT1_RS01595	0.805
CpCpT1_RS03715	CpCpT1_RS01080	0.804
CpCpT1_RS02270	CpCpT1_RS01080	0.804
CpCpT1_RS04110	CpCpT1_RS03075	0.802
CpCpT1_RS02265	CpCpT1_RS03720	0.801
CpCpT1_RS02265	CpCpT1_RS01455	0.801
CpCpT1_RS03205	CpCpT1_RS10010	0.8
CpCpT1_RS03075	CpCpT1_RS01610	0.8
