# Supplementary material for: Co-Expression Networks for Causal Gene Identification Based on RNA-seq Data of C<em>orynebacterium Pseudotuberculosis</em>
Source: Preprints.org preprint supplement (doi:10.20944/preprints202006.0144.v1), 2020-06-12
Supplement: Supplementary file 3 [file Datasheet 1-Whole genome network analysis clusters.xlsx]

## Sheet: Network_analysis_Clusters_CP13
AverageShortestPathLength	BetweennessCentrality	ClosenessCentrality	ClusteringCoefficient	Degree	Eccentricity	IsSingleNode	name	kmeans Cluster	NeighborhoodConnectivity	NumberOfDirectedEdges	NumberOfUndirectedEdges	PartnerOfMultiEdgedNodePairs	Radiality	selected	SelfLoops	shared name	Stress	TopologicalCoefficient
2.659564393939394	3.9723935232210196E-5	0.3760014242478191	0.32142857142857145	8	4	false	"CpCp13_RS08535"	0	182.25	0	8	0	0.9964690119277886	false	0	"CpCp13_RS02035"	6182	0.22374078624078625
2.5482954545454546	2.5763758406058732E-5	0.39241917502787066	0.42857142857142855	15	4	false	"CpCp13_RS01555"	0	171.33333333333334	0	15	0	0.996705754352031	false	0	"CpCp13_RS01980"	6112	0.1704809286898839
2.7604166666666665	1.4364458365493616E-6	0.36226415094339626	0.4	6	4	false	"CpCp13_RS06340"	0	199.0	0	6	0	0.9962544326241134	false	0	"CpCp13_RS05905"	854	0.2800469483568075
2.9332386363636362	6.952553108421344E-5	0.34092009685230024	0.4	6	4	false	"CpCp13_RS09075"	0	71.5	0	6	0	0.9958867263056093	false	0	"CpCp13_RS08030"	6268	0.22153209109730848
2.366477272727273	4.9234266870560186E-5	0.42256902761104437	0.30434782608695654	24	4	false	"CpCp13_RS02605"	0	207.58333333333334	0	24	0	0.9970926015473889	false	0	"CpCp13_RS01215"	25582	0.15726010101010102
3.1519886363636362	2.5085928626885974E-5	0.31726002703920686	0.21428571428571427	9	4	false	"CpCp13_RS02900"	0	22.625	0	9	1	0.9954213007736944	false	0	"CpCp13_RS09885"	2224	0.17857142857142858
2.5880681818181817	4.139336588239979E-6	0.38638858397365533	0.4090909090909091	12	4	false	"CpCp13_RS09365"	0	207.5	0	12	0	0.9966211315280464	false	0	"CpCp13_RS07880"	2346	0.2143595041322314
2.621685606060606	6.512878887466412E-5	0.38143398952501356	0.27472527472527475	14	4	false	"CpCp13_RS01295"	0	98.85714285714286	0	14	0	0.996549605093488	false	0	"CpCp13_RS05760"	14160	0.12011803506335705
2.8385416666666665	4.93011805142495E-5	0.3522935779816514	0.47953216374269003	19	4	false	"CpCp13_RS03125"	0	80.47368421052632	0	19	0	0.9960882092198581	false	0	"CpCp13_RS10425"	6676	0.17764610200999187
3.231534090909091	3.136383353098788E-5	0.30945054945054945	0.2	8	4	false	"CpCp13_RS08015"	0	27.333333333333332	0	8	2	0.9952520551257253	false	0	"CpCp13_RS00545"	2048	0.2
2.993844696969697	1.543862816271953E-5	0.3340186620275186	0.45454545454545453	14	4	false	"CpCp13_RS09390"	0	42.54545454545455	0	14	3	0.99575777724049	false	0	"CpCp13_RS02185"	1768	0.1649048625792812
2.6548295454545454	5.687885555506662E-4	0.3766720171214553	0.17204301075268819	36	4	false	"CpCp13_RS09055"	0	52.87096774193548	0	36	5	0.9964790860735009	false	0	"CpCp13_RS08535"	52280	0.07559185933822511
2.4043560606060606	2.704823778385607E-5	0.4159117762898779	0.4166666666666667	24	4	false	"CpCp13_RS00870"	0	200.08333333333334	0	24	0	0.9970120083816892	false	0	"CpCp13_RS06330"	18036	0.16019482252468642
2.856060606060606	8.591094488568958E-5	0.35013262599469497	0.22727272727272727	12	4	false	"CpCp13_RS02920"	0	54.333333333333336	0	12	0	0.996050934880722	false	0	"CpCp13_RS06575"	10270	0.14018087855297157
2.444602272727273	2.3726772591512748E-5	0.4090644973852411	0.3736842105263158	20	4	false	"CpCp13_RS07475"	0	188.7	0	20	0	0.9969263781431335	false	0	"CpCp13_RS05590"	14974	0.1615582191780822
2.678503787878788	2.9854748316924406E-4	0.37334276118083787	0.2134387351778656	29	4	false	"CpCp13_RS02345"	0	57.78260869565217	0	29	6	0.9964287153449387	false	0	"CpCp13_RS01665"	29326	0.08728490739524497
2.699810606060606	1.2180873425368938E-4	0.37039635215713784	0.19852941176470587	20	4	false	"CpCp13_RS03365"	0	69.76470588235294	0	20	3	0.9963833816892327	false	0	"CpCp13_RS00305"	13452	0.10849876498033117
2.6695075757575757	7.742333455232337E-5	0.3746009223128769	0.3619047619047619	22	4	false	"CpCp13_RS10845"	0	86.33333333333333	0	22	1	0.9964478562217924	false	0	"CpCp13_RS07960"	18438	0.11940986629783311
2.4109848484848486	1.7341767264227376E-4	0.4147682639434407	0.25806451612903225	35	4	false	"CpCp13_RS03750"	0	124.5	0	35	3	0.9969979045776918	false	0	"CpCp13_RS01555"	49908	0.1017156862745098
2.7452651515151514	4.791200698774061E-6	0.36426353915143156	0.5277777777777778	9	4	false	"CpCp13_RS07630"	0	138.44444444444446	0	9	0	0.9962866698903934	false	0	"CpCp13_RS06055"	1572	0.2180227471566054
2.7012310606060606	1.5781441324667144E-4	0.3702015775635408	0.3412698412698413	28	4	false	"CpCp13_RS03205"	0	67.64285714285714	0	28	0	0.9963803594455191	false	0	"CpCp13_RS07225"	20798	0.10771155595996361
2.906723484848485	7.816690072555802E-5	0.3440299723081935	0.1111111111111111	13	4	false	"CpCp13_RS04155"	0	34.3	0	13	3	0.9959431415215989	false	0	"CpCp13_RS07165"	5532	0.12754716981132075
2.446496212121212	3.773285787901253E-5	0.4087478227211148	0.2679738562091503	18	4	false	"CpCp13_RS04355"	0	170.5	0	18	0	0.9969223484848485	false	0	"CpCp13_RS07710"	13882	0.146603611349957
2.788352272727273	8.172452314583022E-5	0.358634742740703	0.23809523809523808	7	4	false	"CpCp13_RS09015"	0	104.28571428571429	0	7	0	0.9961949951644101	false	0	"CpCp13_RS07580"	5350	0.20691609977324263
2.6458333333333335	1.2188821155565395E-5	0.3779527559055118	0.45454545454545453	15	4	false	"CpCp13_RS08205"	0	117.41666666666667	0	15	3	0.9964982269503546	false	0	"CpCp13_RS01830"	3684	0.14513803049031726
2.477272727272727	6.526374465922395E-5	0.4036697247706422	0.4380952380952381	21	4	false	"CpCp13_RS03115"	0	192.71428571428572	0	21	0	0.9968568665377175	false	0	"CpCp13_RS06295"	17196	0.17299307514747372
2.812973484848485	1.6012996489845306E-4	0.3554957077933008	0.16666666666666666	12	4	false	"CpCp13_RS04445"	0	50.416666666666664	0	12	0	0.9961426096067053	false	0	"CpCp13_RS06915"	12180	0.12070343725019984
2.866477272727273	9.372212841301036E-5	0.34886025768087214	0.23076923076923078	17	4	false	"CpCp13_RS08110"	0	42.30769230769231	0	17	4	0.9960287717601548	false	0	"CpCp13_RS03570"	6588	0.11929595827900913
2.4862689393939394	3.435351736306044E-5	0.4022091030279947	0.23529411764705882	18	4	false	"CpCp13_RS09595"	0	164.88888888888889	0	18	0	0.9968377256608639	false	0	"CpCp13_RS05620"	12424	0.15003538570417552
2.4332386363636362	4.946813627618773E-5	0.4109748978400467	0.3852813852813853	22	4	false	"CpCp13_RS05145"	0	217.77272727272728	0	22	0	0.9969505560928433	false	0	"CpCp13_RS01745"	22282	0.18102471094989797
2.915246212121212	7.415704440239351E-5	0.3430242000974501	0.3333333333333333	9	4	false	"CpCp13_RS06825"	0	68.88888888888889	0	9	0	0.9959250080593166	false	0	"CpCp13_RS10560"	10764	0.16454013822434876
2.915719696969697	7.304760276054336E-5	0.3429684962650211	0.3956043956043956	17	4	false	"CpCp13_RS02515"	0	41.57142857142857	0	17	3	0.9959240006447453	false	0	"CpCp13_RS01905"	4678	0.13344051446945338
2.8446969696969697	3.876012129999255E-5	0.35153129161118507	0.4	11	4	false	"CpCp13_RS06520"	0	65.5	0	11	1	0.9960751128304319	false	0	"CpCp13_RS10555"	4580	0.15595238095238095
2.706912878787879	1.1598963493727291E-5	0.3694245233514081	0.41818181818181815	11	4	false	"CpCp13_RS00825"	0	124.0909090909091	0	11	0	0.9963682704706641	false	0	"CpCp13_RS06345"	3264	0.17880534451139637
2.570075757575758	2.26517736523141E-4	0.3890935887988209	0.26666666666666666	16	4	false	"CpCp13_RS02675"	0	100.6875	0	16	0	0.9966594132817537	false	0	"CpCp13_RS08825"	20930	0.11137997787610619
2.550662878787879	1.9721858066050404E-4	0.392054947094858	0.2894736842105263	20	4	false	"CpCp13_RS05265"	0	136.5	0	20	0	0.9967007172791748	false	0	"CpCp13_RS04485"	35404	0.1436842105263158
2.7646780303030303	3.1969146389953563E-4	0.36170577153622196	0.22875816993464052	22	4	false	"CpCp13_RS05680"	0	43.611111111111114	0	22	4	0.9962453658929723	false	0	"CpCp13_RS02865"	42124	0.08900226757369614
2.3115530303030303	1.337845443988212E-4	0.43260958623514956	0.39540910773787485	76	4	false	"CpCp13_RS04385"	0	186.16216216216216	0	76	2	0.9972094616376532	false	0	"CpCp13_RS08950"	68582	0.13364117886730953
2.615530303030303	2.5065551895111116E-4	0.38233164373642287	0.3561253561253561	33	4	false	"CpCp13_RS03130"	0	102.96296296296296	0	33	6	0.9965627014829143	false	0	"CpCp13_RS10385"	33892	0.13000374111485222
2.4431818181818183	1.577973478464339E-5	0.40930232558139534	0.4246153846153846	26	4	false	"CpCp13_RS09655"	0	248.76923076923077	0	26	0	0.9969294003868472	false	0	"CpCp13_RS01860"	11474	0.21171849427168576
2.437026515151515	5.774912305617848E-5	0.41033611812706433	0.34942528735632183	30	4	false	"CpCp13_RS02835"	0	209.5	0	30	0	0.9969424967762734	false	0	"CpCp13_RS09565"	30518	0.1759026028547439
2.6974431818181817	2.5573180924730923E-4	0.37072143233280674	0.26406926406926406	31	4	false	"CpCp13_RS05635"	0	55.95454545454545	0	31	9	0.996388418762089	false	0	"CpCp13_RS00865"	23790	0.08909959467284308
2.971590909090909	4.4656389510952146E-5	0.3365200764818356	0.17857142857142858	11	4	false	"CpCp13_RS04805"	0	33.5	0	11	3	0.9958051257253384	false	0	"CpCp13_RS06415"	3094	0.1504524886877828
2.7296401515151514	1.9945522125061483E-4	0.36634865568083264	0.3	26	4	false	"CpCp13_RS06390"	0	64.71428571428571	0	26	5	0.9963199145712444	false	0	"CpCp13_RS02520"	25188	0.11413454270597127
2.5255681818181817	3.295623381919793E-5	0.39595050618672667	0.46438746438746437	27	4	false	"CpCp13_RS00600"	0	163.5185185185185	0	27	0	0.9967541102514507	false	0	"CpCp13_RS00525"	13272	0.1638462109403993
2.6387310606060606	6.77283319365426E-5	0.37897003409294816	0.2727272727272727	12	4	false	"CpCp13_RS02645"	0	97.08333333333333	0	12	0	0.9965133381689233	false	0	"CpCp13_RS03825"	9014	0.12591872027669693
2.6543560606060606	1.4142099611005922E-4	0.37673920799143773	0.35333333333333333	25	4	false	"CpCp13_RS09600"	0	95.48	0	25	0	0.9964800934880722	false	0	"CpCp13_RS10445"	20396	0.13079452054794521
2.6571969696969697	4.0727117617973964E-4	0.37633642195295797	0.18128654970760233	22	4	false	"CpCp13_RS06795"	0	68.36842105263158	0	22	3	0.9964740490006447	false	0	"CpCp13_RS00580"	51458	0.09621942179392143
2.712594696969697	6.207740055793331E-6	0.3686507243847094	0.5636363636363636	12	4	false	"CpCp13_RS08750"	0	126.27272727272727	0	12	1	0.9963561814958092	false	0	"CpCp13_RS05615"	2124	0.1904566022213081
2.771780303030303	2.2499967636453345E-4	0.3607789545609839	0.17647058823529413	24	4	false	"CpCp13_RS08840"	0	43.166666666666664	0	24	6	0.9962302546744036	false	0	"CpCp13_RS03465"	15750	0.08993055555555556
2.499526515151515	1.691529737886721E-4	0.40007577192650123	0.3722943722943723	22	4	false	"CpCp13_RS08280"	0	179.22727272727272	0	22	0	0.9968095180528691	false	0	"CpCp13_RS08150"	35698	0.1711817313536511
2.8167613636363638	1.0079093568338519E-4	0.3550176500252143	0.2948717948717949	18	4	false	"CpCp13_RS01220"	0	52.38461538461539	0	18	5	0.9961345502901354	false	0	"CpCp13_RS07825"	8556	0.12789166823396653
2.3963068181818183	7.126682740503333E-5	0.41730883224659154	0.33251231527093594	29	4	false	"CpCp13_RS09280"	0	189.0	0	29	0	0.9970291344294004	false	0	"CpCp13_RS07590"	28708	0.15
2.913352272727273	5.31016333353809E-5	0.3432471964895173	0.41911764705882354	24	4	false	"CpCp13_RS04070"	0	36.705882352941174	0	24	7	0.9959290377176016	false	0	"CpCp13_RS08400"	4886	0.12034715525554485
2.705965909090909	2.1843311935387162E-4	0.3695538057742782	0.3333333333333333	28	4	false	"CpCp13_RS05600"	0	53.22727272727273	0	28	6	0.9963702852998065	false	0	"CpCp13_RS00985"	19882	0.08598913203113526
2.6851325757575757	1.668770392727709E-4	0.37242108975489335	0.2683982683982684	28	4	false	"CpCp13_RS00730"	0	82.72727272727273	0	28	6	0.9964146115409414	false	0	"CpCp13_RS02305"	23466	0.12610864745011086
2.750473484848485	1.6361277949682678E-4	0.3635737648476502	0.36594202898550726	33	4	false	"CpCp13_RS08230"	0	48.916666666666664	0	33	9	0.9962755883301095	false	0	"CpCp13_RS00990"	16634	0.09345124282982792
2.804924242424242	2.212224725652823E-4	0.35651586765698856	0.29473684210526313	28	4	false	"CpCp13_RS10325"	0	41.65	0	28	8	0.9961597356544165	false	0	"CpCp13_RS03735"	27504	0.09708624708624708
2.690814393939394	1.790643049962761E-4	0.37163469998240367	0.2153846153846154	30	4	false	"CpCp13_RS03460"	0	61.46153846153846	0	30	4	0.9964025225660864	false	0	"CpCp13_RS07355"	23490	0.087872785297678
2.2708333333333335	4.65059909699813E-4	0.4403669724770642	0.2470967741935484	133	4	false	"CpCp13_RS04160"	0	130.392	0	133	8	0.9972960992907802	false	0	"CpCp13_RS07265"	146042	0.09176073187895847
2.5639204545454546	8.023241813776557E-5	0.39002770083102495	0.34236453201970446	31	4	false	"CpCp13_RS01460"	0	130.9655172413793	0	31	2	0.9966725096711799	false	0	"CpCp13_RS08850"	17522	0.1372804163955758
2.460700757575758	1.523521339099331E-4	0.4063883009428516	0.36666666666666664	30	4	false	"CpCp13_RS03550"	0	156.6	0	30	5	0.9968921260477112	false	0	"CpCp13_RS09860"	37164	0.13950089126559714
2.6865530303030303	2.748916312593357E-4	0.3722241804723299	0.3076923076923077	32	4	false	"CpCp13_RS10000"	0	62.92307692307692	0	32	6	0.9964115892972276	false	0	"CpCp13_RS10215"	33698	0.09725359648079895
2.507575757575758	9.62959129644702E-6	0.39879154078549844	0.5614035087719298	19	4	false	"CpCp13_RS04270"	0	240.0	0	19	0	0.996792392005158	false	0	"CpCp13_RS04875"	4216	0.22408963585434175
2.6818181818181817	6.035095194889655E-4	0.3728813559322034	0.19206349206349208	47	4	false	"CpCp13_RS04890"	0	50.02777777777778	0	47	11	0.99642166344294	false	0	"CpCp13_RS10300"	61500	0.07849293563579278
2.4711174242424243	5.824488652596049E-5	0.4046752251389155	0.26143790849673204	18	4	false	"CpCp13_RS04360"	0	174.66666666666666	0	18	0	0.9968699629271438	false	0	"CpCp13_RS04200"	18432	0.15457227138643068
2.8953598484848486	2.4291258123970176E-4	0.3453802125919869	0.225	22	4	false	"CpCp13_RS09870"	0	32.125	0	22	6	0.9959673194713088	false	0	"CpCp13_RS00400"	30296	0.11263250883392226
2.7244318181818183	1.0698772636777391E-4	0.3670490093847758	0.32967032967032966	18	4	false	"CpCp13_RS08350"	0	80.0	0	18	4	0.9963309961315281	false	0	"CpCp13_RS04885"	14732	0.1282051282051282
2.4644886363636362	2.0289928603337252E-5	0.40576368876080693	0.4576719576719577	30	4	false	"CpCp13_RS03740"	0	197.46428571428572	0	30	2	0.9968840667311413	false	0	"CpCp13_RS01755"	10660	0.17245789145352464
2.320549242424242	5.6041335651698893E-5	0.43093246276270153	0.40336134453781514	35	4	false	"CpCp13_RS04440"	0	235.45714285714286	0	35	0	0.9971903207607995	false	0	"CpCp13_RS06340"	40578	0.16710939876305383
2.6463068181818183	5.208929868160372E-4	0.37788513150831987	0.23295454545454544	43	4	false	"CpCp13_RS02925"	0	47.45454545454545	0	43	10	0.9964972195357834	false	0	"CpCp13_RS10210"	47472	0.06636999364272092
2.461647727272727	1.2505366496813004E-4	0.4062319676860935	0.3693181818181818	33	4	false	"CpCp13_RS03870"	0	151.66666666666666	0	33	0	0.9968901112185686	false	0	"CpCp13_RS02540"	38124	0.13578036407042673
2.480587121212121	8.14146104197985E-4	0.4031303683909143	0.24404761904761904	58	4	false	"CpCp13_RS08420"	0	86.12244897959184	0	58	9	0.9968498146357189	false	0	"CpCp13_RS07760"	113596	0.0818654457980911
2.8489583333333335	1.2424215857703073E-4	0.3510054844606947	0.3333333333333333	22	4	false	"CpCp13_RS07520"	0	48.5625	0	22	6	0.9960660460992908	false	0	"CpCp13_RS02940"	9918	0.12388392857142858
2.6927083333333335	1.1071157368838733E-4	0.37137330754352027	0.19883040935672514	25	4	false	"CpCp13_RS01690"	0	66.89473684210526	0	25	6	0.9963984929078015	false	0	"CpCp13_RS09190"	13762	0.10387381497221314
2.653409090909091	9.593316038841408E-5	0.37687366167023556	0.24242424242424243	12	4	false	"CpCp13_RS00250"	0	115.41666666666667	0	12	0	0.9964821083172147	false	0	"CpCp13_RS06515"	11382	0.15006510416666666
2.8882575757575757	1.1266355649809462E-4	0.3462295081967213	0.13636363636363635	12	4	false	"CpCp13_RS00110"	0	32.166666666666664	0	12	0	0.9959824306898776	false	0	"CpCp13_RS10290"	8048	0.11053240740740741
2.6676136363636362	2.6460868398573686E-4	0.37486687965921195	0.2717391304347826	33	4	false	"CpCp13_RS00610"	0	62.416666666666664	0	33	9	0.9964518858800774	false	0	"CpCp13_RS08775"	27416	0.09119152046783625
2.637310606060606	1.5426066236253418E-5	0.3791741472172352	0.3333333333333333	9	4	false	"CpCp13_RS09680"	0	151.11111111111111	0	9	0	0.996516360412637	false	0	"CpCp13_RS03100"	5206	0.1874827681279294
2.633049242424242	9.841944297704631E-5	0.37978780794821076	0.32105263157894737	22	4	false	"CpCp13_RS08705"	0	105.55	0	22	2	0.9965254271437782	false	0	"CpCp13_RS05020"	16596	0.13144458281444582
2.5303030303030303	9.3477475886982E-4	0.39520958083832336	0.2372448979591837	71	4	false	"CpCp13_RS00540"	0	71.61224489795919	0	71	22	0.9967440361057383	false	0	"CpCp13_RS04610"	115596	0.0753813104189044
2.725378787878788	6.767407590441409E-5	0.3669214732453092	0.4066666666666667	32	4	false	"CpCp13_RS07490"	0	69.52	0	32	7	0.9963289813023856	false	0	"CpCp13_RS08100"	14106	0.10678955453149001
2.7864583333333335	5.447185741386187E-5	0.35887850467289717	0.4327485380116959	20	4	false	"CpCp13_RS09645"	0	69.94736842105263	0	20	1	0.9961990248226951	false	0	"CpCp13_RS09230"	8608	0.1442213781877374
2.616477272727273	2.2866219269018406E-5	0.3821932681867535	0.26373626373626374	14	4	false	"CpCp13_RS06040"	0	156.64285714285714	0	14	0	0.9965606866537718	false	0	"CpCp13_RS02095"	7452	0.17861215181625673
2.844223484848485	4.5894035160104935E-5	0.35158981188613286	0.3787878787878788	14	4	false	"CpCp13_RS04870"	0	51.916666666666664	0	14	2	0.9960761202450032	false	0	"CpCp13_RS06535"	4400	0.13311965811965812
2.555871212121212	4.517147574103148E-5	0.39125602074842536	0.3333333333333333	20	4	false	"CpCp13_RS00215"	0	122.0	0	20	1	0.9966896357188911	false	0	"CpCp13_RS02530"	12056	0.12616339193381593
2.4389204545454546	9.706248442848052E-5	0.4100174723354688	0.3693181818181818	33	4	false	"CpCp13_RS08135"	0	190.27272727272728	0	33	0	0.9969384671179884	false	0	"CpCp13_RS04645"	39248	0.16262626262626262
2.925189393939394	1.558133459500705E-4	0.34185820653933313	0.23076923076923078	15	4	false	"CpCp13_RS06170"	0	33.92307692307692	0	15	2	0.9959038523533205	false	0	"CpCp13_RS07705"	17952	0.11294057113455107
2.507575757575758	5.04856495026814E-4	0.39879154078549844	0.26600284495021337	42	4	false	"CpCp13_RS08560"	0	86.44736842105263	0	42	4	0.996792392005158	false	0	"CpCp13_RS01985"	73026	0.08593177775452548
2.546875	9.708402598959403E-6	0.39263803680981596	0.5842105263157895	20	4	false	"CpCp13_RS09440"	0	194.25	0	20	0	0.9967087765957446	false	0	"CpCp13_RS06615"	5530	0.199435318275154
2.555871212121212	8.852792719060626E-5	0.39125602074842536	0.26842105263157895	20	4	false	"CpCp13_RS07855"	0	138.4	0	20	0	0.9966896357188911	false	0	"CpCp13_RS04815"	20486	0.14297520661157026
2.7523674242424243	1.824351124870139E-4	0.36332358506795115	0.27898550724637683	35	4	false	"CpCp13_RS06730"	0	48.208333333333336	0	35	11	0.9962715586718246	false	0	"CpCp13_RS09075"	16262	0.09113106490233144
2.991477272727273	8.281754101882887E-5	0.3342830009496676	0.2948717948717949	16	4	false	"CpCp13_RS01325"	0	30.76923076923077	0	16	3	0.9957628143133462	false	0	"CpCp13_RS04040"	5918	0.1322944297082228
2.737215909090909	2.0006849756469132E-4	0.365334717176959	0.3891625615763547	33	4	false	"CpCp13_RS10310"	0	76.03448275862068	0	33	4	0.9963037959381044	false	0	"CpCp13_RS10420"	21214	0.12865394713810607
2.5880681818181817	2.8992668582526407E-4	0.38638858397365533	0.3635307781649245	42	4	false	"CpCp13_RS02820"	0	97.23809523809524	0	42	0	0.9966211315280464	false	0	"CpCp13_RS08830"	54008	0.11589761053408253
2.705965909090909	3.240142941621915E-4	0.3695538057742782	0.2930298719772404	47	4	false	"CpCp13_RS04340"	0	57.60526315789474	0	47	9	0.9963702852998065	false	0	"CpCp13_RS10410"	41542	0.09129201768287597
2.413825757575758	4.485480122276655E-5	0.4142801098469988	0.42613636363636365	33	4	false	"CpCp13_RS02600"	0	200.57575757575756	0	33	0	0.9969918600902644	false	0	"CpCp13_RS09175"	22202	0.16373531230674088
2.804450757575758	1.5216282377887133E-4	0.35657605942934323	0.3238095238095238	29	4	false	"CpCp13_RS03610"	0	45.523809523809526	0	29	8	0.9961607430689877	false	0	"CpCp13_RS03675"	15310	0.10839002267573696
2.771780303030303	1.9302531673262048E-4	0.3607789545609839	0.34838709677419355	43	4	false	"CpCp13_RS09210"	0	47.483870967741936	0	43	12	0.9962302546744036	false	0	"CpCp13_RS01645"	23712	0.09690585911784068
2.464962121212121	4.7754687897531706E-5	0.4056857472147522	0.47058823529411764	38	4	false	"CpCp13_RS08335"	0	157.23529411764707	0	38	4	0.99688305931657	false	0	"CpCp13_RS02605"	22594	0.14026342026551925
2.820549242424242	1.018860972865743E-4	0.35454087628000674	0.37894736842105264	30	4	false	"CpCp13_RS03050"	0	47.2	0	30	10	0.9961264909735654	false	0	"CpCp13_RS00300"	13732	0.11597051597051597
2.640625	3.142337121037243E-4	0.378698224852071	0.32903225806451614	42	4	false	"CpCp13_RS10515"		62.83870967741935	0	42	11	0.9965093085106383	false	0	"CpCp13_RS09060"	37070	0.08572811688597456
2.7163825757575757	3.417242728055196E-4	0.3681366567892627	0.3076923076923077	13	4	false	"CpCp13_RS04600"	0	99.53846153846153	0	13	0	0.9963481221792392	false	0	"CpCp13_RS01035"	48768	0.16054590570719604
2.4517045454545454	1.2330133074452463E-4	0.4078794901506373	0.4421768707482993	50	4	false	"CpCp13_RS02080"	0	127.87755102040816	0	50	1	0.9969112669245648	false	0	"CpCp13_RS00125"	38968	0.11387137223544805
2.6453598484848486	2.0810997863351583E-4	0.3780204045104707	0.36615384615384616	29	4	false	"CpCp13_RS07785"	0	87.57692307692308	0	29	3	0.9964992343649258	false	0	"CpCp13_RS08020"	27288	0.11893812709030101
2.711647727272727	3.071814439054598E-4	0.36877946568884235	0.24867724867724866	40	4	false	"CpCp13_RS06580"	0	49.785714285714285	0	40	12	0.9963581963249516	false	0	"CpCp13_RS04595"	27706	0.08423978728547256
2.825284090909091	1.0121899658901766E-5	0.3539467068878834	0.3333333333333333	9	4	false	"CpCp13_RS10840"	0	82.11111111111111	0	9	0	0.996116416827853	false	0	"CpCp13_RS03590"	2390	0.1726315789473684
2.6458333333333335	3.0290984811389397E-4	0.3779527559055118	0.25873015873015875	44	4	false	"CpCp13_RS06745"	0	65.13888888888889	0	44	8	0.9964982269503546	false	0	"CpCp13_RS00415"	38006	0.08972298745026018
2.796875	2.3030429020355693E-4	0.3575418994413408	0.26842105263157895	23	4	false	"CpCp13_RS08670"	0	42.05	0	23	3	0.9961768617021277	false	0	"CpCp13_RS09400"	22938	0.09722222222222222
2.8224431818181817	4.917126492637878E-5	0.35430296930045296	0.4945054945054945	14	4	false	"CpCp13_RS02315"	0	81.92857142857143	0	14	0	0.9961224613152805	false	0	"CpCp13_RS00195"	5432	0.16637630662020905
2.428030303030303	1.3216766064327949E-4	0.4118564742589703	0.31076923076923074	27	4	false	"CpCp13_RS07635"	0	143.03846153846155	0	27	1	0.996961637653127	false	0	"CpCp13_RS10570"	39436	0.11939771413894953
2.743844696969697	9.363553807399764E-5	0.3644521138912856	0.3894736842105263	27	4	false	"CpCp13_RS09290"	0	69.6	0	27	7	0.996289692134107	false	0	"CpCp13_RS06350"	10790	0.12231985940246046
2.304450757575758	2.525216976707495E-4	0.4339428806246147	0.32346723044397463	44	4	false	"CpCp13_RS10630"	1	150.0681818181818	0	44	0	0.9972245728562218	false	0	"CpCp13_RS08175"	88052	0.10516340702044977
2.7206439393939394	1.8311873428490018E-4	0.3675600417681866	0.3544973544973545	31	4	false	"CpCp13_RS09435"	1	60.357142857142854	0	31	3	0.996339055448098	false	0	"CpCp13_RS09250"	26426	0.09992904446546831
2.7485795454545454	3.2267510179127855E-4	0.3638242894056848	0.22528735632183908	34	4	false	"CpCp13_RS07260"	1	41.56666666666667	0	34	4	0.9962796179883946	false	0	"CpCp13_RS02900"	38966	0.07978246960972489
2.803503787878788	6.119201043073593E-5	0.35669650396892416	0.5128205128205128	14	4	false	"CpCp13_RS00160"	1	79.53846153846153	0	14	1	0.9961627578981301	false	0	"CpCp13_RS01840"	11738	0.1492278828113725
2.434185606060606	1.4540777102885228E-5	0.4108150165337483	0.4924924924924925	37	4	false	"CpCp13_RS09685"	1	253.43243243243242	0	37	0	0.9969485412637008	false	0	"CpCp13_RS09365"	10920	0.2131475462005319
2.722064393939394	1.793249328839335E-4	0.36736823795442686	0.17543859649122806	24	4	false	"CpCp13_RS00980"	1	50.94736842105263	0	24	5	0.9963360332043844	false	0	"CpCp13_RS10065"	16306	0.08694090174241063
2.4005681818181817	2.0941411555691546E-5	0.41656804733727815	0.4426829268292683	41	4	false	"CpCp13_RS02690"	1	226.4390243902439	0	41	0	0.9970200676982591	false	0	"CpCp13_RS04635"	14106	0.18115121951219512
2.7945075757575757	3.5417102289861995E-5	0.35784479837343275	0.36363636363636365	11	4	false	"CpCp13_RS02325"	1	111.18181818181819	0	11	0	0.9961818987749839	false	0	"CpCp13_RS03175"	5872	0.20475472961660807
2.347537878787879	2.2349928180624237E-5	0.4259782170229931	0.48404255319148937	48	4	false	"CpCp13_RS08425"	1	250.95833333333334	0	48	0	0.9971328981302385	false	0	"CpCp13_RS04020"	22800	0.1867249503968254
2.7916666666666665	3.0378289006797992E-5	0.35820895522388063	0.3111111111111111	10	4	false	"CpCp13_RS02685"	1	87.7	0	10	0	0.9961879432624113	false	0	"CpCp13_RS00220"	4838	0.1691119691119691
2.741950757575758	1.1949090712107754E-4	0.3647038508029701	0.25274725274725274	20	4	false	"CpCp13_RS03510"	1	65.71428571428571	0	20	6	0.9962937217923921	false	0	"CpCp13_RS01080"	12140	0.11605562579013906
2.7945075757575757	4.816892776967511E-5	0.35784479837343275	0.4632352941176471	21	4	false	"CpCp13_RS09865"	1	48.294117647058826	0	21	4	0.9961818987749839	false	0	"CpCp13_RS10865"	6518	0.10901606692338335
2.5137310606060606	3.881055654791504E-4	0.39781503107929933	0.31092436974789917	40	4	false	"CpCp13_RS01290"	1	79.65714285714286	0	40	5	0.9967792956157318	false	0	"CpCp13_RS08650"	60694	0.07863488929629107
2.831439393939394	9.783866311862012E-6	0.3531772575250836	0.5111111111111111	10	4	false	"CpCp13_RS07410"	1	76.9	0	10	0	0.9961033204384269	false	0	"CpCp13_RS08695"	2292	0.1538
2.703125	1.5648700459962558E-4	0.3699421965317919	0.30153846153846153	36	4	false	"CpCp13_RS00165"	1	67.84615384615384	0	36	10	0.996376329787234	false	0	"CpCp13_RS01295"	19572	0.10752163842496648
2.749526515151515	3.675181347556138E-4	0.3636989839848459	0.28	39	4	false	"CpCp13_RS07015"	1	45.57692307692308	0	39	13	0.9962776031592522	false	0	"CpCp13_RS07720"	33192	0.0871451684071187
2.3110795454545454	7.077811005417203E-5	0.4326982175783651	0.38164251207729466	46	4	false	"CpCp13_RS07370"	1	232.41304347826087	0	46	0	0.9972104690522243	false	0	"CpCp13_RS04180"	48796	0.16413350528125767
2.8082386363636362	2.554727806625085E-4	0.35609509357612545	0.33497536945812806	41	4	false	"CpCp13_RS00480"	1	39.62068965517241	0	41	12	0.9961526837524178	false	0	"CpCp13_RS06180"	25526	0.09905172413793104
2.521780303030303	4.199041740261362E-5	0.39654524971836275	0.4430769230769231	26	4	false	"CpCp13_RS05175"	1	179.69230769230768	0	26	0	0.9967621695680207	false	0	"CpCp13_RS07935"	14916	0.17311397658218466
2.761837121212121	2.871821460417096E-4	0.3620778330190297	0.31907308377896615	46	4	false	"CpCp13_RS06855"	1	42.11764705882353	0	46	12	0.9962514103803998	false	0	"CpCp13_RS08055"	30754	0.08389969533630186
2.3953598484848486	1.8085680973579875E-4	0.41747380905317255	0.34984984984984985	37	4	false	"CpCp13_RS07755"	1	148.54054054054055	0	37	0	0.9970311492585429	false	0	"CpCp13_RS03125"	54138	0.11940557921265317
2.668087121212121	3.408012223579045E-4	0.3748003549245785	0.3525252525252525	52	4	false	"CpCp13_RS04895"	1	63.733333333333334	0	52	7	0.9964508784655061	false	0	"CpCp13_RS10525"	54852	0.09372549019607843
2.4583333333333335	3.7469716975530266E-5	0.4067796610169491	0.48188405797101447	24	4	false	"CpCp13_RS05790"	1	209.58333333333334	0	24	0	0.9968971631205674	false	0	"CpCp13_RS06325"	13342	0.18272304562627142
2.65625	1.763453493318126E-4	0.3764705882352941	0.2727272727272727	22	4	false	"CpCp13_RS05060"	1	104.36363636363636	0	22	0	0.9964760638297873	false	0	"CpCp13_RS06015"	24230	0.13872098646034817
2.709753787878788	1.447934398975127E-4	0.36903721824218066	0.37549407114624506	29	4	false	"CpCp13_RS00335"	1	79.82608695652173	0	29	6	0.9963622259832365	false	0	"CpCp13_RS04045"	17468	0.1312929061784897
3.0293560606060606	9.586061793454509E-5	0.33010315723663647	0.28205128205128205	14	4	false	"CpCp13_RS05660"	1	32.0	0	14	1	0.9956822211476467	false	0	"CpCp13_RS01265"	8018	0.1467564693371145
2.5885416666666665	7.149788492463874E-4	0.38631790744466804	0.20307692307692307	32	4	false	"CpCp13_RS09875"	1	71.46153846153847	0	32	6	0.9966201241134751	false	0	"CpCp13_RS08540"	85382	0.08412612122859472
2.787878787878788	1.0295194424997352E-4	0.358695652173913	0.3736842105263158	29	4	false	"CpCp13_RS02215"	1	57.35	0	29	9	0.9961960025789812	false	0	"CpCp13_RS07725"	15810	0.12510917030567686
2.6922348484848486	2.3201259366883878E-4	0.3714386211748153	0.2887624466571835	48	4	false	"CpCp13_RS02210"	1	64.15789473684211	0	48	10	0.9963995003223726	false	0	"CpCp13_RS06710"	33404	0.09885654042656719
2.3257575757575757	1.3165177568128108E-4	0.42996742671009774	0.3314009661835749	46	4	false	"CpCp13_RS04480"	1	188.1086956521739	0	46	0	0.9971792392005159	false	0	"CpCp13_RS01060"	63562	0.13611338325048764
2.259469696969697	0.0014138581989896124	0.4425817267393127	0.22325761987963502	121	4	false	"CpCp13_RS02740"	1	112.57843137254902	0	121	19	0.99732027724049	false	0	"CpCp13_RS09560"	283728	0.07679292726640452
2.7144886363636362	8.977396560592739E-5	0.3683935112506541	0.4393939393939394	37	4	false	"CpCp13_RS06425"	1	81.45454545454545	0	37	4	0.9963521518375242	false	0	"CpCp13_RS08015"	14552	0.13689839572192514
2.8304924242424243	2.2807502533131325E-4	0.35329541652726665	0.31521739130434784	34	4	false	"CpCp13_RS00630"	1	39.75	0	34	10	0.9961053352675693	false	0	"CpCp13_RS09390"	20044	0.11142322097378277
2.6832386363636362	2.0664630314895158E-4	0.3726839597670725	0.4367816091954023	31	4	false	"CpCp13_RS02535"	1	76.03333333333333	0	31	1	0.9964186411992263	false	0	"CpCp13_RS02755"	40010	0.1143358395989975
2.691287878787879	6.158195494528366E-5	0.37156931738212523	0.5324675324675324	22	4	false	"CpCp13_RS06560"	1	93.54545454545455	0	22	0	0.9964015151515152	false	0	"CpCp13_RS10565"	14830	0.14238273142382732
2.612215909090909	7.5141138163509E-4	0.38281674823273515	0.23751686909581646	43	4	false	"CpCp13_RS07350"	1	70.56410256410257	0	43	4	0.9965697533849129	false	0	"CpCp13_RS00920"	86286	0.0896621379467631
2.625	3.941316741774677E-4	0.38095238095238093	0.3871794871794872	56	4	false	"CpCp13_RS09620"	1	67.75	0	56	16	0.9965425531914893	false	0	"CpCp13_RS01910"	61564	0.08973509933774834
2.412878787878788	4.9471303928923595E-5	0.41444270015698587	0.31	25	4	false	"CpCp13_RS06625"	1	201.16	0	25	0	0.9969938749194068	false	0	"CpCp13_RS08635"	24560	0.16232445520581112
2.2632575757575757	1.7127038013788317E-4	0.44184100418410044	0.36767676767676766	45	4	false	"CpCp13_RS04830"	1	188.0888888888889	0	45	0	0.9973122179239201	false	0	"CpCp13_RS06070"	91148	0.12415108177484416
2.461647727272727	2.0306390769447E-5	0.4062319676860935	0.37549407114624506	23	4	false	"CpCp13_RS03415"	1	216.08695652173913	0	23	0	0.9968901112185686	false	0	"CpCp13_RS05430"	13092	0.18954996186117468
2.4209280303030303	1.9500777324392797E-5	0.41306473694504203	0.3916256157635468	29	4	false	"CpCp13_RS08285"	1	270.51724137931035	0	29	0	0.9969767488716957	false	0	"CpCp13_RS10815"	14762	0.22173544375353307
2.7518939393939394	2.3828746400324523E-4	0.3633860977288369	0.22380952380952382	25	4	false	"CpCp13_RS09355"	1	46.57142857142857	0	25	4	0.9962725660863959	false	0	"CpCp13_RS10695"	20792	0.08981430410001838
2.428977272727273	1.854992128966684E-5	0.4116959064327485	0.4160919540229885	30	4	false	"CpCp13_RS04735"	1	272.26666666666665	0	30	0	0.9969596228239845	false	0	"CpCp13_RS08395"	13874	0.2255730461198564
2.4171401515151514	2.015837098379859E-5	0.4137120470127326	0.3931034482758621	30	4	false	"CpCp13_RS00130"	1	271.8333333333333	0	30	0	0.9969848081882657	false	0	"CpCp13_RS07230"	15404	0.2217237629146275
2.4365530303030303	4.517446493177091E-5	0.4104158569762923	0.4717741935483871	32	4	false	"CpCp13_RS05010"	1	229.6875	0	32	0	0.9969435041908447	false	0	"CpCp13_RS09540"	17788	0.1949808998302207
2.2211174242424243	0.003553193207292052	0.45022383287145595	0.10700056915196357	260	4	false	"CpCp13_RS07830"	1	86.8452380952381	0	260	8	0.9974018778207607	false	0	"CpCp13_RS10630"	725058	0.062032312925170065
2.2286931818181817	0.00381971140258914	0.4486934353091141	0.1263782866836302	272	4	false	"CpCp13_RS10455"	1	94.6145038167939	0	272	10	0.9973857591876208	false	0	"CpCp13_RS09435"	789572	0.0689107820952614
2.155776515151515	0.007414224787971258	0.4638699758401054	0.09741961741961742	363	4	false	"CpCp13_RS00210"	1	83.46438746438747	0	363	12	0.9975409010315925	false	0	"CpCp13_RS07210"	1418968	0.05824252509528155
2.794034090909091	6.396287479756213E-5	0.35790543975597355	0.45098039215686275	22	4	false	"CpCp13_RS05295"	1	46.166666666666664	0	22	4	0.9961829061895552	false	0	"CpCp13_RS07295"	10208	0.10421369450714824
2.794034090909091	6.396287479756213E-5	0.35790543975597355	0.45098039215686275	23	4	false	"CpCp13_RS03490"	1	46.166666666666664	0	23	5	0.9961829061895552	false	0	"CpCp13_RS10730"	10208	0.10421369450714824
2.600378787878788	1.8643829097172345E-4	0.38455935906773486	0.3894736842105263	20	4	false	"CpCp13_RS00875"	1	106.4	0	20	0	0.996594938749194	false	0	"CpCp13_RS10535"	26046	0.12803850782190132
2.4706439393939394	1.718386032930814E-4	0.40475277884246835	0.36507936507936506	38	4	false	"CpCp13_RS05650"	1	137.72222222222223	0	38	2	0.996870970341715	false	0	"CpCp13_RS09055"	34762	0.12486148886874182
2.8300189393939394	6.220936766712054E-5	0.35335452568178016	0.35947712418300654	22	4	false	"CpCp13_RS05755"	1	49.72222222222222	0	22	4	0.9961063426821406	false	0	"CpCp13_RS02235"	7668	0.12368711995577668
2.7088068181818183	3.5485875559455914E-4	0.36916622968012586	0.20512820512820512	35	4	false	"CpCp13_RS03685"	1	50.888888888888886	0	35	8	0.9963642408123792	false	0	"CpCp13_RS00870"	30418	0.08425312729948492
2.8380681818181817	6.990445326309265E-5	0.35235235235235235	0.38333333333333336	21	4	false	"CpCp13_RS01515"	1	42.9375	0	21	5	0.9960892166344294	false	0	"CpCp13_RS08740"	7880	0.12095070422535212
2.415246212121212	2.1341322456443767E-5	0.4140364634385415	0.3816091954022989	30	4	false	"CpCp13_RS08145"	1	223.0	0	30	0	0.9969888378465507	false	0	"CpCp13_RS09035"	13324	0.18144833197721724
2.7334280303030303	3.536981809976043E-4	0.3658409838905249	0.2887700534759358	45	4	false	"CpCp13_RS04000"	1	45.61764705882353	0	45	11	0.9963118552546745	false	0	"CpCp13_RS02430"	34260	0.08309225329476053
2.8551136363636362	9.579362196225959E-5	0.3502487562189055	0.4	19	4	false	"CpCp13_RS08080"	1	45.86666666666667	0	19	4	0.9960529497098646	false	0	"CpCp13_RS07290"	7692	0.12936732766761094
2.5989583333333335	3.389138194105095E-4	0.3847695390781563	0.3065953654188948	40	4	false	"CpCp13_RS05420"	1	72.94117647058823	0	40	6	0.9965979609929079	false	0	"CpCp13_RS07750"	41848	0.0877751822750761
2.7391098484848486	2.2065055402734212E-4	0.3650821089023336	0.2813852813852814	33	4	false	"CpCp13_RS00145"	1	44.77272727272727	0	33	11	0.9962997662798194	false	0	"CpCp13_RS03305"	19348	0.08206839032527107
2.662405303030303	2.8948477579704572E-6	0.3756002134092121	0.5606060606060606	12	4	false	"CpCp13_RS06640"	1	206.83333333333334	0	12	0	0.996462967440361	false	0	"CpCp13_RS01140"	2236	0.26337579617834395
2.3920454545454546	2.536459450098039E-4	0.4180522565320665	0.2606060606060606	48	4	false	"CpCp13_RS01180"	1	118.11111111111111	0	48	3	0.9970382011605416	false	0	"CpCp13_RS05425"	70288	0.09479222400570715
2.524621212121212	2.1033660864120304E-5	0.3960990247561891	0.4338461538461538	27	4	false	"CpCp13_RS04005"	1	190.92307692307693	0	27	1	0.9967561250805932	false	0	"CpCp13_RS00375"	9576	0.18500298151460942
2.4483901515151514	8.610038204562612E-4	0.4084316379810482	0.14727272727272728	111	4	false	"CpCp13_RS09405"	1	67.89	0	111	11	0.9969183188265636	false	0	"CpCp13_RS09585"	129530	0.06222731439046746
2.290246212121212	9.231834546215176E-5	0.4366342774446972	0.3388704318936877	43	4	false	"CpCp13_RS07030"	1	229.65116279069767	0	43	0	0.9972547952933591	false	0	"CpCp13_RS10220"	55008	0.15751108559032762
2.65625	2.3095306839258171E-4	0.3764705882352941	0.17647058823529413	20	4	false	"CpCp13_RS07910"	10	64.66666666666667	0	20	2	0.9964760638297873	false	0	"CpCp13_RS08765"	25980	0.08961319155493913
2.6581439393939394	2.3278541554680462E-4	0.3762023512646954	0.2549019607843137	18	4	false	"CpCp13_RS04415"	10	79.5	0	18	0	0.9964720341715022	false	0	"CpCp13_RS08220"	29222	0.11118881118881119
2.359375	2.4480196400829264E-5	0.423841059602649	0.4551341350601295	47	4	false	"CpCp13_RS01045"	10	257.8936170212766	0	47	0	0.9971077127659574	false	0	"CpCp13_RS07330"	22038	0.19478369865655332
2.652462121212121	8.103963531556784E-5	0.3770082113530882	0.3137254901960784	21	4	false	"CpCp13_RS00050"	10	82.11111111111111	0	21	3	0.9964841231463571	false	0	"CpCp13_RS03495"	13710	0.11263526901386983
2.671401515151515	5.252872223225312E-4	0.3743353420772776	0.2556818181818182	47	4	false	"CpCp13_RS08250"	10	53.96969696969697	0	47	14	0.9964438265635075	false	0	"CpCp13_RS02250"	66982	0.08127966411098941
2.487215909090909	6.951522159188749E-4	0.40205596801827526	0.22410147991543342	54	4	false	"CpCp13_RS00190"	10	89.38636363636364	0	54	10	0.9968357108317214	false	0	"CpCp13_RS01675"	122380	0.08551544149630275
2.662878787878788	1.0896565873002224E-5	0.37553342816500707	0.32051282051282054	14	4	false	"CpCp13_RS01210"	10	153.53846153846155	0	14	1	0.9964619600257898	false	0	"CpCp13_RS04130"	3852	0.17957714799820063
2.5634469696969697	3.1897848510773535E-5	0.3900997414111563	0.3904761904761905	21	4	false	"CpCp13_RS05450"	10	154.1904761904762	0	21	0	0.996673517085751	false	0	"CpCp13_RS02465"	12368	0.15879554705507332
2.640151515151515	4.1460799615836743E-4	0.3787661406025825	0.21323529411764705	19	4	false	"CpCp13_RS03800"	10	65.70588235294117	0	19	2	0.9965103159252096	false	0	"CpCp13_RS10540"	50590	0.0876078431372549
2.6415719696969697	2.0212964672292015E-4	0.3785624663918265	0.21666666666666667	18	4	false	"CpCp13_RS08950"	11	69.5625	0	18	2	0.9965072936814957	false	0	"CpCp13_RS07245"	22120	0.09287383177570094
2.554924242424242	5.412916155558639E-4	0.3914010378057821	0.22988505747126436	40	4	false	"CpCp13_RS05375"	11	86.3	0	40	10	0.9966916505480335	false	0	"CpCp13_RS07155"	58722	0.09442013129102844
2.456439393939394	1.8292811265658337E-4	0.4070932922127988	0.44761904761904764	37	4	false	"CpCp13_RS03220"	11	200.19444444444446	0	37	1	0.9969011927788524	false	0	"CpCp13_RS02920"	41118	0.17638277043563388
2.9171401515151514	5.844545348597722E-5	0.34280149326408055	0.3090909090909091	12	4	false	"CpCp13_RS06120"	11	38.90909090909091	0	12	1	0.9959209784010317	false	0	"CpCp13_RS04555"	4940	0.13846651569071497
2.4019886363636362	3.063345476426422E-5	0.4163217031342401	0.44804318488529016	39	4	false	"CpCp13_RS08960"	11	243.0	0	39	0	0.9970170454545455	false	0	"CpCp13_RS05350"	19484	0.19518072289156627
2.3735795454545454	1.8949967466617816E-4	0.4213046080191502	0.29506172839506173	87	4	false	"CpCp13_RS07770"	11	134.11111111111111	0	87	6	0.9970774903288201	false	0	"CpCp13_RS03180"	55462	0.10694665957823853
2.4005681818181817	6.404927672038881E-5	0.41656804733727815	0.45528455284552843	42	4	false	"CpCp13_RS09445"	11	224.78571428571428	0	42	0	0.9970200676982591	false	0	"CpCp13_RS06395"	29124	0.18113272706342812
2.305871212121212	6.94882317764051E-5	0.43367556468172486	0.4262626262626263	55	4	false	"CpCp13_RS03975"	11	255.65454545454546	0	55	0	0.9972215506125081	false	0	"CpCp13_RS01875"	49238	0.1808023659508808
2.5255681818181817	2.2625211045193285E-5	0.39595050618672667	0.42292490118577075	23	4	false	"CpCp13_RS06590"	11	221.56521739130434	0	23	0	0.9967541102514507	false	0	"CpCp13_RS08700"	13314	0.2092211684526009
2.3773674242424243	1.9863996545619299E-4	0.4206333399721171	0.3743078626799557	48	4	false	"CpCp13_RS00740"	11	171.4418604651163	0	48	5	0.9970694310122501	false	0	"CpCp13_RS00845"	54430	0.13352169818155474
2.750473484848485	8.787218733517176E-5	0.3635737648476502	0.4782608695652174	28	4	false	"CpCp13_RS03730"	11	69.8695652173913	0	28	5	0.9962755883301095	false	0	"CpCp13_RS01155"	11762	0.13333886491868568
2.522253787878788	4.5050653193361024E-5	0.39647080908578936	0.4095238095238095	21	4	false	"CpCp13_RS09815"	11	182.23809523809524	0	21	0	0.9967611621534493	false	0	"CpCp13_RS08165"	12430	0.1760754543363239
2.660037878787879	2.195503795930079E-4	0.3759344962620149	0.3	33	4	false	"CpCp13_RS01925"	11	60.44	0	33	8	0.9964680045132173	false	0	"CpCp13_RS06225"	36544	0.08671449067431851
2.6074810606060606	2.2515691449989845E-4	0.38351189395315055	0.27956989247311825	37	4	false	"CpCp13_RS06945"	11	74.45161290322581	0	37	6	0.9965798275306254	false	0	"CpCp13_RS07475"	34966	0.0898089419821783
2.5018939393939394	5.487165714460829E-4	0.3996971990915973	0.24064171122994651	38	4	false	"CpCp13_RS06810"	11	86.61764705882354	0	38	4	0.996804480980013	false	0	"CpCp13_RS02345"	74626	0.08500259770247648
2.374526515151515	4.058726173169341E-4	0.42113659022931205	0.2701612903225806	32	4	false	"CpCp13_RS08330"	11	115.53125	0	32	0	0.9970754754996777	false	0	"CpCp13_RS02390"	76674	0.08955910852713178
2.398200757575758	7.997358139029597E-5	0.4169792694965449	0.3697115384615385	69	4	false	"CpCp13_RS06865"	11	158.09230769230768	0	69	4	0.9970251047711154	false	0	"CpCp13_RS02240"	28296	0.12873966424455024
2.3892045454545454	5.8426012323764906E-5	0.41854934601664684	0.3323076923076923	26	4	false	"CpCp13_RS10595"	11	180.46153846153845	0	26	0	0.997044245647969	false	0	"CpCp13_RS01775"	26668	0.1414275379792621
2.8546401515151514	1.231446626881248E-4	0.3503068502239177	0.3201581027667984	23	4	false	"CpCp13_RS02745"	11	38.34782608695652	0	23	0	0.9960539571244359	false	0	"CpCp13_RS02650"	15544	0.1144711226476314
2.402462121212121	4.96546925249916E-5	0.41623965313362243	0.41532976827094475	34	4	false	"CpCp13_RS10035"	11	218.94117647058823	0	34	0	0.9970160380399742	false	0	"CpCp13_RS03365"	24738	0.1761393213761772
2.4375	1.5681686697047683E-4	0.41025641025641024	0.4495967741935484	32	4	false	"CpCp13_RS00405"	11	170.65625	0	32	0	0.9969414893617021	false	0	"CpCp13_RS03905"	42424	0.14683734939759036
2.6732954545454546	4.228098373084588E-4	0.3740701381509033	0.2968253968253968	46	4	false	"CpCp13_RS07945"	11	59.55555555555556	0	46	10	0.9964397969052224	false	0	"CpCp13_RS04150"	45050	0.08969210174029452
2.461647727272727	1.8313876729430952E-5	0.4062319676860935	0.3742690058479532	19	4	false	"CpCp13_RS09805"	11	197.57894736842104	0	19	0	0.9968901112185686	false	0	"CpCp13_RS06385"	9268	0.17032667876588023
2.399147727272727	7.947985216646047E-5	0.4168146832445234	0.39510204081632655	50	4	false	"CpCp13_RS06235"	11	197.28	0	50	0	0.9970230899419729	false	0	"CpCp13_RS04925"	42920	0.16144026186579377
2.491950757575758	1.091439316435765E-5	0.4012920387611628	0.5741935483870968	31	4	false	"CpCp13_RS09665"	11	235.38709677419354	0	31	0	0.996825636686009	false	0	"CpCp13_RS10765"	6426	0.22102074814478267
2.6581439393939394	9.51450260588426E-4	0.3762023512646954	0.19770114942528735	47	4	false	"CpCp13_RS06270"	11	47.0	0	47	17	0.9964720341715022	false	0	"CpCp13_RS04405"	83322	0.06743185078909612
2.5582386363636362	5.823492599309413E-5	0.39089394780677406	0.38735177865612647	24	4	false	"CpCp13_RS03045"	11	120.1304347826087	0	24	1	0.9966845986460349	false	0	"CpCp13_RS02885"	16606	0.12834448160535117
2.7457386363636362	4.56207162074263E-4	0.3642007242628039	0.2784090909090909	46	4	false	"CpCp13_RS04865"	11	42.18181818181818	0	46	13	0.9962856624758221	false	0	"CpCp13_RS01805"	42088	0.08222576643629276
2.488162878787879	1.1871557564503792E-5	0.4019029495718363	0.49407114624505927	24	4	false	"CpCp13_RS05705"	11	224.52173913043478	0	24	1	0.996833696002579	false	0	"CpCp13_RS04960"	6950	0.20523010889436452
2.747159090909091	1.369070651396535E-4	0.3640124095139607	0.30735930735930733	28	4	false	"CpCp13_RS05185"	11	51.27272727272727	0	28	6	0.9962826402321083	false	0	"CpCp13_RS02300"	15018	0.09766233766233766
2.706439393939394	1.3699862136782662E-4	0.36948915325402376	0.26900584795321636	23	4	false	"CpCp13_RS03200"	11	61.21052631578947	0	23	4	0.9963692778852353	false	0	"CpCp13_RS03770"	16026	0.0992066877079246
2.6671401515151514	1.2528737374888267E-4	0.37493342801349194	0.391812865497076	25	4	false	"CpCp13_RS08730"	11	107.47368421052632	0	25	6	0.9964528932946487	false	0	"CpCp13_RS10725"	20170	0.15052336724163348
2.2760416666666665	7.332413747962704E-4	0.4393592677345538	0.255181787291879	117	4	false	"CpCp13_RS05280"	11	127.39449541284404	0	117	8	0.9972850177304964	false	0	"CpCp13_RS04950"	235394	0.08927434857242049
2.5	4.062976381339027E-5	0.4	0.39666666666666667	25	4	false	"CpCp13_RS10010"	11	212.36	0	25	0	0.9968085106382979	false	0	"CpCp13_RS02245"	14432	0.19554327808471456
2.886837121212121	5.789615794220122E-5	0.3463998687879285	0.31666666666666665	21	4	false	"CpCp13_RS06695"	12	54.25	0	21	5	0.9959854529335912	false	0	"CpCp13_RS07160"	6442	0.14018087855297157
2.5804924242424243	1.9761896162745004E-5	0.3875229357798165	0.34615384615384615	13	4	false	"CpCp13_RS08115"	12	169.84615384615384	0	13	0	0.9966372501611863	false	0	"CpCp13_RS07885"	6946	0.18137738330046022
2.7978219696969697	1.520548592951147E-4	0.3574208833982061	0.2857142857142857	28	4	false	"CpCp13_RS08725"	12	48.68181818181818	0	28	6	0.9961748468729851	false	0	"CpCp13_RS01810"	16968	0.10794194718806692
2.778409090909091	2.3758345559163314E-4	0.35991820040899797	0.19523809523809524	28	4	false	"CpCp13_RS05325"	12	48.095238095238095	0	28	7	0.9962161508704063	false	0	"CpCp13_RS07525"	23254	0.1023454157782516
2.6619318181818183	2.09995627566086E-4	0.37566702241195304	0.3253968253968254	28	4	false	"CpCp13_RS01595"	12	59.214285714285715	0	28	0	0.9964639748549323	false	0	"CpCp13_RS00105"	26526	0.08442021601793356
2.472537878787879	4.016023399503055E-4	0.4044427422443508	0.300944669365722	44	4	false	"CpCp13_RS09950"	12	98.76923076923077	0	44	5	0.9968669406834301	false	0	"CpCp13_RS10375"	65370	0.09119965906669508
2.9886363636363638	9.535682788944112E-5	0.33460076045627374	0.3142857142857143	24	4	false	"CpCp13_RS04370"	12	28.533333333333335	0	24	9	0.9957688588007737	false	0	"CpCp13_RS09380"	6226	0.12911010558069383
3.084280303030303	7.207162482884475E-6	0.32422474669941664	0.3333333333333333	4	4	false	"CpCp13_RS05670"	12	49.5	0	4	0	0.9955653610573824	false	0	"CpCp13_RS00030"	560	0.27668539325842695
2.862215909090909	1.589108596982068E-4	0.34937965260545906	0.225	22	4	false	"CpCp13_RS06690"	12	39.9375	0	22	6	0.9960378384912959	false	0	"CpCp13_RS10075"	11852	0.11313739376770539
2.4232954545454546	1.080701706460545E-4	0.4126611957796014	0.41352657004830917	46	4	false	"CpCp13_RS05245"	12	199.43478260869566	0	46	0	0.9969717117988395	false	0	"CpCp13_RS08940"	49160	0.16801582359620526
2.414299242424242	3.795894913182471E-5	0.41419886252206317	0.4269230769230769	41	4	false	"CpCp13_RS05920"	12	195.9	0	41	1	0.9969908526756931	false	0	"CpCp13_RS06320"	21544	0.16216887417218542
2.5113636363636362	4.1639631329180626E-4	0.3981900452488688	0.2963709677419355	36	4	false	"CpCp13_RS09170"	12	76.78125	0	36	4	0.996784332688588	false	0	"CpCp13_RS10845"	55406	0.07647534860557768
2.3702651515151514	1.3147165797406255E-4	0.4218937275269677	0.3507246376811594	46	4	false	"CpCp13_RS10230"	12	155.65217391304347	0	46	0	0.9970845422308189	false	0	"CpCp13_RS06885"	44382	0.1208479611126114
2.752840909090909	3.5705058226350085E-4	0.3632610939112487	0.2160919540229885	43	4	false	"CpCp13_RS01915"	12	38.4	0	43	13	0.9962705512572533	false	0	"CpCp13_RS08895"	33304	0.0768
2.429924242424242	2.6644077946136807E-4	0.41153546375682	0.29554655870445345	45	4	false	"CpCp13_RS03775"	12	107.84615384615384	0	45	6	0.996957607994842	false	0	"CpCp13_RS02630"	58514	0.09233403582718651
2.2670454545454546	1.044571837796181E-4	0.44110275689223055	0.4052464947987336	68	4	false	"CpCp13_RS05985"	12	227.2537313432836	0	68	1	0.9973041586073501	false	0	"CpCp13_RS05730"	78844	0.1532391984782762
2.624526515151515	2.835525413473702E-4	0.3810211077034097	0.3261538461538461	28	4	false	"CpCp13_RS05320"	12	65.1923076923077	0	28	2	0.9965435606060606	false	0	"CpCp13_RS01015"	39168	0.0836871729041177
2.6036931818181817	1.9707365103878828E-4	0.38406983087834157	0.36470588235294116	39	4	false	"CpCp13_RS02175"	12	68.11428571428571	0	39	4	0.9965878868471953	false	0	"CpCp13_RS04490"	32682	0.08236310243565383
2.648200757575758	2.98983304161893E-4	0.377614875737529	0.22333333333333333	32	4	false	"CpCp13_RS01160"	12	61.48	0	32	7	0.9964931898774984	false	0	"CpCp13_RS09385"	34636	0.08538888888888889
2.3863636363636362	9.17427984291008E-5	0.41904761904761906	0.3487903225806452	32	4	false	"CpCp13_RS02560"	12	178.25	0	32	0	0.9970502901353966	false	0	"CpCp13_RS06645"	43650	0.13980392156862745
2.589962121212121	2.838815758768483E-4	0.3861060329067642	0.3657505285412262	59	4	false	"CpCp13_RS00255"	12	85.31818181818181	0	59	15	0.9966171018697615	false	0	"CpCp13_RS07800"	55932	0.10304128238910848
2.5984848484848486	3.4059933455746395E-4	0.3848396501457726	0.28475033738191635	50	3	false	"CpCp13_RS02290"	12	62.8974358974359	0	50	11	0.996598968407479	false	0	"CpCp13_RS09980"	51664	0.07774713955183671
3.128787878787879	8.962804940592574E-6	0.3196125907990315	0.4	5	4	false	"CpCp13_RS04055"	12	42.2	0	5	0	0.9954706640876854	false	0	"CpCp13_RS10320"	834	0.22105263157894736
2.535037878787879	4.469316499492199E-5	0.3944714232349645	0.3631578947368421	20	4	false	"CpCp13_RS04510"	12	146.35	0	20	0	0.9967339619600258	false	0	"CpCp13_RS00005"	15162	0.15041109969167524
2.7230113636363638	2.4154617512668448E-4	0.36724047991653624	0.2553846153846154	36	4	false	"CpCp13_RS00995"	12	48.88461538461539	0	36	10	0.9963340183752417	false	0	"CpCp13_RS03750"	24122	0.08645336963921035
2.8224431818181817	2.137422377011167E-4	0.35430296930045296	0.35384615384615387	31	4	false	"CpCp13_RS04705"	12	43.38461538461539	0	31	5	0.9961224613152805	false	0	"CpCp13_RS08595"	21282	0.09362020269147699
2.7793560606060606	1.547709923672203E-4	0.3597955706984668	0.20952380952380953	18	4	false	"CpCp13_RS09830"	12	44.86666666666667	0	18	3	0.9962141360412637	false	0	"CpCp13_RS09520"	11538	0.09718004338394794
2.3428030303030303	6.597978512596703E-5	0.42683912691996767	0.4141749723145072	43	4	false	"CpCp13_RS06790"	12	235.53488372093022	0	43	0	0.9971429722759511	false	0	"CpCp13_RS07050"	41854	0.17293310111668886
2.318655303030303	5.411854160686799E-5	0.43128445987339187	0.3885291396854764	48	4	false	"CpCp13_RS00350"	12	209.59574468085106	0	48	1	0.9971943504190844	false	0	"CpCp13_RS05625"	30862	0.14939112236696442
2.663825757575758	4.484320464174976E-5	0.37539992890152857	0.47186147186147187	22	4	false	"CpCp13_RS03445"	12	99.77272727272727	0	22	0	0.9964599451966474	false	0	"CpCp13_RS09430"	10674	0.1368624516772665
2.539772727272727	9.600147237409495E-5	0.39373601789709173	0.3566666666666667	25	4	false	"CpCp13_RS03830"	12	118.84	0	25	0	0.9967238878143133	false	0	"CpCp13_RS02680"	20544	0.12327800829875518
2.878314393939394	1.7091956959927306E-5	0.34742556341503533	0.38095238095238093	7	4	false	"CpCp13_RS07325"	12	61.857142857142854	0	7	0	0.9960035863958737	false	0	"CpCp13_RS06630"	2240	0.1808688387635756
2.6363636363636362	9.232796494851856E-4	0.37931034482758624	0.16829268292682928	53	4	false	"CpCp13_RS08210"	12	46.0	0	53	12	0.9965183752417796	false	0	"CpCp13_RS07780"	90586	0.06284153005464481
2.5265151515151514	7.683943466839631E-6	0.39580209895052476	0.45263157894736844	20	4	false	"CpCp13_RS06960"	12	255.45	0	20	0	0.9967520954223082	false	0	"CpCp13_RS04920"	5126	0.24421606118546846
2.4985795454545454	2.3844786142542195E-5	0.40022740193291645	0.4963768115942029	24	4	false	"CpCp13_RS00925"	12	203.04166666666666	0	24	0	0.9968115328820115	false	0	"CpCp13_RS04165"	14560	0.18610601894286588
2.6268939393939394	2.1233740528062557E-4	0.38067772170151404	0.42602495543672014	40	4	false	"CpCp13_RS00435"	12	99.61764705882354	0	40	6	0.9965385235332044	false	0	"CpCp13_RS10245"	33336	0.12937356760886173
2.443655303030303	0.0010499816854737073	0.40922301879480716	0.2547747747747748	89	3	false	"CpCp13_RS05100"	12	88.04	0	89	14	0.996928392972276	false	0	"CpCp13_RS05815"	168538	0.08003636363636364
2.6889204545454546	9.749245931530428E-5	0.3718964606444797	0.3	16	4	false	"CpCp13_RS03680"	12	80.8125	0	16	0	0.9964065522243714	false	0	"CpCp13_RS10870"	13390	0.12061567164179104
2.5355113636363638	1.8107055808769042E-5	0.39439775910364144	0.40441176470588236	17	4	false	"CpCp13_RS08260"	12	187.35294117647058	0	17	0	0.9967329545454545	false	0	"CpCp13_RS06750"	8956	0.1811923995903971
2.312026515151515	1.4117221563512478E-4	0.43252099119393816	0.3749019607843137	51	4	false	"CpCp13_RS00890"	12	209.15686274509804	0	51	0	0.9972084542230819	false	0	"CpCp13_RS04065"	76632	0.14823307069106878
2.6742424242424243	3.3409288856481686E-4	0.37393767705382436	0.3147502903600465	58	4	false	"CpCp13_RS09900"	12	60.73809523809524	0	58	16	0.9964377820760799	false	0	"CpCp13_RS07680"	51174	0.09358720375669528
2.387310606060606	1.6628951422833486E-5	0.4188813962713209	0.4741532976827095	34	4	false	"CpCp13_RS05410"	12	249.05882352941177	0	34	0	0.997048275306254	false	0	"CpCp13_RS07630"	14316	0.19549358204820388
2.5260416666666665	1.289326812031115E-4	0.39587628865979385	0.3964059196617336	44	4	false	"CpCp13_RS06230"	12	128.97727272727272	0	44	0	0.9967531028368793	false	0	"CpCp13_RS06605"	38206	0.13379385137683894
2.4663825757575757	3.904080983605216E-4	0.40545210213092725	0.2164705882352941	57	4	false	"CpCp13_RS00280"	12	77.6470588235294	0	57	6	0.9968800370728562	false	0	"CpCp13_RS01965"	72774	0.07182891658050825
2.7646780303030303	2.264280567573364E-4	0.36170577153622196	0.2572463768115942	32	4	false	"CpCp13_RS05820"	12	42.208333333333336	0	32	8	0.9962453658929723	false	0	"CpCp13_RS05045"	21808	0.08756915629322268
2.727746212121212	7.987201365926462E-5	0.3666030203089742	0.391812865497076	19	4	false	"CpCp13_RS09270"	12	96.52631578947368	0	19	0	0.9963239442295294	false	0	"CpCp13_RS05935"	12328	0.16195690568703638
2.599905303030303	2.201364496457181E-4	0.38462939355308684	0.3412698412698413	34	4	false	"CpCp13_RS01610"	12	81.17857142857143	0	34	6	0.9965959461637653	false	0	"CpCp13_RS03205"	34170	0.0987573861661453
2.4673295454545454	6.683398305214026E-5	0.4052964881980426	0.30526315789473685	20	4	false	"CpCp13_RS02160"	12	150.7	0	20	0	0.9968780222437137	false	0	"CpCp13_RS07615"	23828	0.13312720848056536
2.706912878787879	1.0620355950756932E-4	0.3694245233514081	0.36666666666666664	30	4	false	"CpCp13_RS02275"	12	70.61904761904762	0	30	9	0.9963682704706641	false	0	"CpCp13_RS09505"	17198	0.1103422619047619
2.6392045454545454	8.354013291856949E-4	0.3789020452099031	0.19047619047619047	55	4	false	"CpCp13_RS04470"	12	48.25581395348837	0	55	12	0.996512330754352	false	0	"CpCp13_RS07125"	76898	0.06689675192723285
2.695075757575758	6.609582859267826E-4	0.3710470836261419	0.24333333333333335	32	4	false	"CpCp13_RS04245"	12	42.6	0	32	7	0.9963934558349452	false	0	"CpCp13_RS09935"	47694	0.0678343949044586
2.309659090909091	1.188986460526471E-4	0.43296432964329645	0.3679078014184397	48	4	false	"CpCp13_RS06465"	12	203.33333333333334	0	48	0	0.9972134912959382	false	0	"CpCp13_RS10170"	76764	0.1438000942951438
2.3963068181818183	1.687705164729903E-5	0.41730883224659154	0.49878048780487805	41	4	false	"CpCp13_RS08505"	12	244.0731707317073	0	41	0	0.9970291344294004	false	0	"CpCp13_RS10140"	12764	0.19651624052472408
2.362215909090909	6.371225934403944E-5	0.42333132892363196	0.4196078431372549	51	4	false	"CpCp13_RS03035"	12	214.01960784313727	0	51	0	0.99710166827853	false	0	"CpCp13_RS02460"	33500	0.16337374644514294
2.363162878787879	1.563587430639849E-4	0.42316169104387896	0.3427800269905533	44	4	false	"CpCp13_RS10210"	13	155.92307692307693	0	44	5	0.9970996534493874	false	0	"CpCp13_RS10110"	53858	0.1189344598955583
2.4332386363636362	1.17552928808389E-4	0.4109748978400467	0.3560606060606061	33	4	false	"CpCp13_RS01985"	13	134.3939393939394	0	33	0	0.9969505560928433	false	0	"CpCp13_RS04955"	34038	0.11408653598806401
2.367897727272727	1.1456301200373764E-4	0.4223155368926215	0.3673469387755102	50	4	false	"CpCp13_RS08830"	13	191.8	0	50	0	0.997089579303675	false	0	"CpCp13_RS01765"	44138	0.14799382716049383
2.3536931818181817	3.343371256280775E-5	0.42486421243210626	0.38823529411764707	35	4	false	"CpCp13_RS01645"	13	241.9142857142857	0	35	0	0.9971198017408124	false	0	"CpCp13_RS04155"	24234	0.17932860319813618
2.5738636363636362	6.306605973219302E-4	0.3885209713024283	0.3252032520325203	53	4	false	"CpCp13_RS09060"	13	82.11904761904762	0	53	11	0.9966513539651838	false	0	"CpCp13_RS06255"	76478	0.09548726467331119
2.4261363636363638	6.35609435354561E-5	0.4121779859484777	0.38859180035650626	34	4	false	"CpCp13_RS04595"	13	179.85294117647058	0	34	0	0.996965667311412	false	0	"CpCp13_RS04355"	29158	0.15000245302457932
2.8082386363636362	2.3548324422864803E-4	0.35609509357612545	0.31620553359683795	29	4	false	"CpCp13_RS00415"	13	39.78260869565217	0	29	6	0.9961526837524178	false	0	"CpCp13_RS01715"	21436	0.08980272843262342
2.8579545454545454	1.6204746629339787E-4	0.3499005964214712	0.31620553359683795	31	4	false	"CpCp13_RS08175"	13	34.130434782608695	0	31	8	0.9960469052224371	false	0	"CpCp13_RS02655"	14426	0.09892879647132956
2.721590909090909	1.332929369313546E-4	0.3674321503131524	0.3333333333333333	34	4	false	"CpCp13_RS04635"	13	56.708333333333336	0	34	10	0.9963370406189554	false	0	"CpCp13_RS09015"	17192	0.0957911036036036
2.6818181818181817	5.360137886526677E-4	0.3728813559322034	0.15954415954415954	35	4	false	"CpCp13_RS08650"	13	51.074074074074076	0	35	8	0.99642166344294	false	0	"CpCp13_RS08205"	54998	0.07709522211032785
2.6349431818181817	1.4246854068852735E-4	0.3795148247978437	0.38596491228070173	19	4	false	"CpCp13_RS07720"	13	98.36842105263158	0	19	0	0.9965213974854932	false	0	"CpCp13_RS10100"	18554	0.1269269949066214
2.6827651515151514	1.389136442592737E-4	0.3727497352629721	0.25146198830409355	19	4	false	"CpCp13_RS06180"	13	82.63157894736842	0	19	0	0.9964196486137976	false	0	"CpCp13_RS09215"	18586	0.12444514901712111
2.3101325757575757	8.19698558809709E-4	0.4328755892600943	0.18118304611085234	116	4	false	"CpCp13_RS00920"	13	118.97368421052632	0	116	2	0.9972124838813669	false	0	"CpCp13_RS07235"	200386	0.08819398384768444
2.4417613636363638	8.609610510673364E-5	0.40954043048283884	0.42738205365402404	54	4	false	"CpCp13_RS07750"	13	148.19148936170214	0	54	7	0.9969324226305609	false	0	"CpCp13_RS01630"	31066	0.12644325030861955
2.8072916666666665	2.1272940288254063E-4	0.3562152133580705	0.35384615384615387	33	4	false	"CpCp13_RS10220"	13	39.19230769230769	0	33	7	0.9961546985815602	false	0	"CpCp13_RS08430"	22004	0.09749330271718332
2.3764204545454546	6.977663721897483E-5	0.42080095636580994	0.39878048780487807	41	4	false	"CpCp13_RS07155"	13	188.0487804878049	0	41	0	0.9970714458413927	false	0	"CpCp13_RS10340"	32372	0.14611404855307294
2.902462121212121	6.224250354303079E-5	0.34453507340946166	0.2948717948717949	20	4	false	"CpCp13_RS05350"	13	32.84615384615385	0	20	7	0.9959522082527401	false	0	"CpCp13_RS04305"	4320	0.13160333642261354
2.414299242424242	6.600035402613784E-4	0.41419886252206317	0.34296898524540803	105	4	false	"CpCp13_RS06395"	13	94.64634146341463	0	105	23	0.9969908526756931	false	0	"CpCp13_RS00780"	170932	0.08152139660931493
2.2803030303030303	4.4156063891769774E-4	0.43853820598006643	0.33157894736842103	87	4	false	"CpCp13_RS10375"	13	145.06578947368422	0	87	11	0.9972759509993553	false	0	"CpCp13_RS04095"	158876	0.10011441647597254
2.340435606060606	8.604633866541622E-5	0.4272708881246207	0.4090909090909091	56	4	false	"CpCp13_RS06320"	13	230.76785714285714	0	56	0	0.9971480093488072	false	0	"CpCp13_RS08265"	45372	0.17170227465986396
2.706912878787879	3.058664083204324E-4	0.3694245233514081	0.30303030303030304	45	4	false	"CpCp13_RS08895"	13	48.03030303030303	0	45	12	0.9963682704706641	false	0	"CpCp13_RS07395"	36674	0.08085909601061116
2.8072916666666665	1.63825532076319E-4	0.3562152133580705	0.29411764705882354	24	4	false	"CpCp13_RS04490"	13	53.0	0	24	6	0.9961546985815602	false	0	"CpCp13_RS02455"	11418	0.1127659574468085
2.3418560606060606	7.128418432661528E-5	0.4270117266477962	0.3839859731151373	61	4	false	"CpCp13_RS07050"	13	201.79661016949152	0	61	2	0.9971449871050935	false	0	"CpCp13_RS06970"	41304	0.15070695307654333
2.3082386363636362	8.334486970430561E-4	0.43323076923076925	0.2657407407407407	103	4	false	"CpCp13_RS10245"	13	137.90123456790124	0	103	22	0.9972165135396519	false	0	"CpCp13_RS00170"	176738	0.09978381661932072
2.757102272727273	1.1673615028412373E-4	0.362699639361154	0.26373626373626374	16	4	false	"CpCp13_RS06605"	13	69.42857142857143	0	16	2	0.9962614845261122	false	0	"CpCp13_RS06995"	11816	0.1272608125819135
2.3617424242424243	3.1567589469144975E-5	0.4234161988773055	0.44642857142857145	49	4	false	"CpCp13_RS10140"	13	247.91836734693877	0	49	0	0.9971026756931012	false	0	"CpCp13_RS02575"	23334	0.1893952386149265
2.230587121212121	1.971858208700411E-4	0.448312460199533	0.3424056189640035	68	4	false	"CpCp13_RS10110"	13	206.23529411764707	0	68	0	0.9973817295293359	false	0	"CpCp13_RS08615"	123536	0.13211742095941514
2.8115530303030303	4.447546161634432E-5	0.35567531155271137	0.5476190476190477	22	4	false	"CpCp13_RS10340"	13	81.52380952380952	0	22	1	0.9961456318504192	false	0	"CpCp13_RS02830"	9886	0.1603862017247844
2.5179924242424243	1.3377370626964507E-4	0.397141782625047	0.41700404858299595	43	4	false	"CpCp13_RS01680"	13	133.71794871794873	0	43	4	0.9967702288845905	false	0	"CpCp13_RS01680"	39040	0.1334510466246993
2.280776515151515	6.223535728213098E-5	0.43844716628607017	0.38414634146341464	41	4	false	"CpCp13_RS09010"	13	248.6341463414634	0	41	0	0.9972749435847841	false	0	"CpCp13_RS09010"	53230	0.16754322529748208
2.472064393939394	9.800374183520755E-5	0.40452020685692397	0.4090909090909091	34	4	false	"CpCp13_RS03845"	13	129.03030303030303	0	34	1	0.9968679480980013	false	0	"CpCp13_RS03115"	27022	0.11698123574823484
2.749526515151515	1.4247903757987098E-4	0.3636989839848459	0.29411764705882354	27	4	false	"CpCp13_RS10095"	13	53.529411764705884	0	27	10	0.9962776031592522	false	0	"CpCp13_RS05885"	13774	0.10157383636566582
2.461174242424242	2.3458868062268766E-5	0.4063101192766449	0.4403361344537815	35	4	false	"CpCp13_RS10130"	13	204.22857142857143	0	35	0	0.99689111863314	false	0	"CpCp13_RS04445"	11304	0.17930515489778
2.562973484848485	3.953132387766168E-5	0.3901718086089045	0.43137254901960786	19	4	false	"CpCp13_RS06655"	13	131.27777777777777	0	19	1	0.9966745245003223	false	0	"CpCp13_RS01750"	8884	0.13674768518518518
2.446969696969697	3.5082162762718977E-4	0.40866873065015485	0.32386363636363635	34	4	false	"CpCp13_RS03240"	13	133.3030303030303	0	34	1	0.9969213410702773	false	0	"CpCp13_RS08110"	57230	0.11601656249175832
2.4985795454545454	1.566543445925538E-5	0.40022740193291645	0.4458128078817734	29	4	false	"CpCp13_RS02985"	13	232.93103448275863	0	29	0	0.9968115328820115	false	0	"CpCp13_RS06525"	9734	0.21311165094488438
2.377840909090909	1.441274654609529E-4	0.42054958183990443	0.3521008403361345	96	4	false	"CpCp13_RS02640"	13	150.1764705882353	0	96	11	0.9970684235976789	false	0	"CpCp13_RS06695"	43920	0.1211100569259962
2.6425189393939394	2.321203109036828E-4	0.37842680523203726	0.31451612903225806	43	4	false	"CpCp13_RS01780"	13	72.0625	0	43	11	0.9965052788523533	false	0	"CpCp13_RS03845"	30660	0.09898695054945054
2.355587121212121	9.530019364438242E-4	0.4245226130653266	0.2522982635342186	104	4	false	"CpCp13_RS06490"	13	97.79775280898876	0	104	15	0.9971157720825274	false	0	"CpCp13_RS10365"	165462	0.07640449438202247
2.3148674242424243	6.009929560428021E-4	0.43199018204131723	0.29871977240398295	38	4	false	"CpCp13_RS04030"	13	152.0	0	38	0	0.9972024097356544	false	0	"CpCp13_RS09595"	98918	0.10780141843971631
2.3636363636363638	9.20211458562766E-5	0.4230769230769231	0.39867109634551495	43	4	false	"CpCp13_RS05335"	13	223.06976744186048	0	43	0	0.9970986460348162	false	0	"CpCp13_RS10095"	48536	0.16963480413829693
2.706439393939394	6.701236392516255E-5	0.36948915325402376	0.5238095238095238	21	4	false	"CpCp13_RS08620"	13	93.76190476190476	0	21	0	0.9963692778852353	false	0	"CpCp13_RS05080"	13856	0.14765654293213348
2.3106060606060606	1.77384672972042E-4	0.43278688524590164	0.43439716312056736	48	4	false	"CpCp13_RS06550"	13	210.22916666666666	0	48	0	0.9972114764667956	false	0	"CpCp13_RS09465"	77028	0.14888751180358828
2.320075757575758	0.0019053825473057374	0.43102040816326526	0.1857427897696354	163	4	false	"CpCp13_RS09345"	13	91.90604026845638	0	163	14	0.9971913281753707	false	0	"CpCp13_RS10450"	335296	0.07130026397863179
2.7168560606060606	1.9197332924589727E-4	0.3680724991286162	0.2046783625730994	26	4	false	"CpCp13_RS09700"	13	58.10526315789474	0	26	7	0.996347114764668	false	0	"CpCp13_RS05385"	19412	0.09371816638370119
2.3328598484848486	7.494974665534011E-5	0.42865841282727823	0.4396103896103896	56	4	false	"CpCp13_RS08435"	13	246.17857142857142	0	56	0	0.9971641279819471	false	0	"CpCp13_RS10655"	46530	0.181146851676653
2.7178030303030303	2.6411907423226123E-4	0.3679442508710801	0.25691699604743085	24	4	false	"CpCp13_RS01520"	13	54.21739130434783	0	24	1	0.9963450999355256	false	0	"CpCp13_RS07455"	26322	0.09236352862750907
2.784090909090909	1.5327703967516802E-4	0.35918367346938773	0.38961038961038963	28	4	false	"CpCp13_RS07980"	13	53.77272727272727	0	28	6	0.9962040618955512	false	0	"CpCp13_RS10225"	19484	0.11392526964560863
2.712121212121212	3.6911534116648E-4	0.3687150837988827	0.23484848484848486	46	4	false	"CpCp13_RS06905"	13	48.0	0	46	13	0.9963571889103805	false	0	"CpCp13_RS04330"	34098	0.0823327615780446
2.787405303030303	2.91323088679083E-4	0.358756582299983	0.22	38	4	false	"CpCp13_RS08955"	13	35.88	0	38	13	0.9961970099935525	false	0	"CpCp13_RS05145"	23268	0.08248275862068966
2.371212121212121	2.7756085537326506E-5	0.42172523961661346	0.4778368794326241	48	4	false	"CpCp13_RS03025"	13	272.1666666666667	0	48	0	0.9970825274016764	false	0	"CpCp13_RS06380"	21982	0.21049239494715133
2.6387310606060606	3.6537857559717737E-4	0.37897003409294816	0.34143049932523617	57	4	false	"CpCp13_RS06275"	13	65.43589743589743	0	57	18	0.9965133381689233	false	0	"CpCp13_RS02375"	47494	0.09025641025641026
2.7386363636363638	2.3357173332745954E-4	0.3651452282157676	0.3466666666666667	34	4	false	"CpCp13_RS07970"	13	49.84	0	34	9	0.9963007736943907	false	0	"CpCp13_RS06825"	23570	0.09421550094517958
2.476799242424242	1.1824626504032788E-4	0.40374689351940357	0.2523809523809524	23	4	false	"CpCp13_RS03405"	13	119.38095238095238	0	23	2	0.9968578739522889	false	0	"CpCp13_RS08975"	23458	0.10755040755040755
2.702651515151515	1.8177162820778872E-4	0.37000700770847933	0.26877470355731226	23	4	false	"CpCp13_RS08925"	13	67.21739130434783	0	23	0	0.9963773372018053	false	0	"CpCp13_RS04035"	22334	0.10772017837235229
2.421875	9.633352300694563E-5	0.4129032258064516	0.38461538461538464	26	4	false	"CpCp13_RS05855"	13	165.3846153846154	0	26	0	0.9969747340425532	false	0	"CpCp13_RS06220"	31926	0.13710294680443935
2.700284090909091	1.1661864872628111E-4	0.37033140452393476	0.35714285714285715	21	4	false	"CpCp13_RS02105"	13	71.76190476190476	0	21	0	0.9963823742746616	false	0	"CpCp13_RS09090"	15574	0.11481904761904761
2.425189393939394	6.255557431064372E-5	0.41233893010542755	0.45063879210220675	44	4	false	"CpCp13_RS05395"	13	182.1904761904762	0	44	2	0.9969676821405545	false	0	"CpCp13_RS10130"	27832	0.15297269201551317
2.315340909090909	9.570745981624478E-5	0.43190184049079755	0.348780487804878	41	4	false	"CpCp13_RS09180"	13	220.390243902439	0	41	0	0.9972014023210831	false	0	"CpCp13_RS06655"	44976	0.1563051375194603
2.374526515151515	2.7120138671142443E-4	0.42113659022931205	0.3414512093411176	127	4	false	"CpCp13_RS04280"	13	134.33636363636364	0	127	17	0.9970754754996777	false	0	"CpCp13_RS09855"	83334	0.11038320758945246
2.3546401515151514	0.0010008308823644646	0.42469334405791276	0.3214535290006988	67	3	false	"CpCp13_RS08685"	13	113.03703703703704	0	67	13	0.99711778691167	false	0	"CpCp13_RS10705"	121834	0.08640559519764412
2.4588068181818183	4.161338855128881E-5	0.4067013287117273	0.39901477832512317	29	4	false	"CpCp13_RS05850"	13	180.55172413793105	0	29	0	0.9968961557059961	false	0	"CpCp13_RS03805"	18416	0.15921668795232014
2.9228219696969697	1.1282720033655589E-4	0.34213510448728335	0.30833333333333335	22	4	false	"CpCp13_RS03620"	13	39.0	0	22	6	0.9959088894261766	false	0	"CpCp13_RS06705"	8280	0.1304530201342282
2.446022727272727	8.15134282653796E-5	0.4088269454123113	0.4482758620689655	29	4	false	"CpCp13_RS06680"	13	174.0344827586207	0	29	0	0.9969233558994197	false	0	"CpCp13_RS07840"	25950	0.15067920585161965
2.746685606060606	2.1588803666521828E-5	0.36407515945526636	0.5080459770114942	34	4	false	"CpCp13_RS01970"	13	107.93333333333334	0	34	4	0.9962836476466795	false	0	"CpCp13_RS02515"	6744	0.16759834368530022
2.383996212121212	9.760821820574635E-5	0.4194637537239325	0.43768115942028984	46	4	false	"CpCp13_RS04625"	13	229.7826086956522	0	46	0	0.9970553272082527	false	0	"CpCp13_RS07650"	52490	0.18251200055254344
2.3697916666666665	3.954955272010964E-4	0.421978021978022	0.2462253193960511	43	4	false	"CpCp13_RS05315"	13	110.4047619047619	0	43	1	0.99708554964539	false	0	"CpCp13_RS03240"	95262	0.08558508674787745
2.6605113636363638	4.2900019861482686E-4	0.3758675920982381	0.20656028368794327	60	4	false	"CpCp13_RS01865"	13	66.66666666666667	0	60	12	0.9964669970986461	false	0	"CpCp13_RS06845"	58196	0.09689922480620156
2.2959280303030303	1.0372245986893512E-4	0.4355537224169932	0.37405026300409117	59	4	false	"CpCp13_RS08790"	13	213.3050847457627	0	59	0	0.9972427063185042	false	0	"CpCp13_RS04715"	68662	0.14823146959399772
2.262310606060606	0.0020094130487445525	0.44202595228128927	0.15368924302788844	271	4	false	"CpCp13_RS06860"	13	95.4820717131474	0	271	20	0.9973142327530625	false	0	"CpCp13_RS07260"	407898	0.07266519917286714
2.5984848484848486	4.6510073187740224E-5	0.3848396501457726	0.2916666666666667	16	4	false	"CpCp13_RS06900"	13	119.375	0	16	0	0.996598968407479	false	0	"CpCp13_RS01375"	12534	0.13800578034682082
2.4389204545454546	4.944957731167897E-4	0.4100174723354688	0.15555555555555556	47	4	false	"CpCp13_RS04880"	13	83.97777777777777	0	47	2	0.9969384671179884	false	0	"CpCp13_RS07420"	72580	0.0729414036103871
2.3735795454545454	3.4853043546144406E-5	0.4213046080191502	0.5113725490196078	51	4	false	"CpCp13_RS06370"	13	240.1764705882353	0	51	0	0.9970774903288201	false	0	"CpCp13_RS01410"	26326	0.18690775921263447
2.4393939393939394	8.424731796226861E-4	0.40993788819875776	0.21025641025641026	52	4	false	"CpCp13_RS00745"	13	99.65	0	52	12	0.9969374597034172	false	0	"CpCp13_RS00490"	93600	0.08680313588850175
2.4479166666666665	3.4485733438828184E-5	0.4085106382978724	0.341991341991342	22	4	false	"CpCp13_RS04220"	13	184.22727272727272	0	22	0	0.9969193262411347	false	0	"CpCp13_RS04195"	16118	0.15759390310288515
2.4573863636363638	4.915895580643957E-4	0.40693641618497106	0.2727272727272727	46	4	false	"CpCp13_RS09125"	13	79.45454545454545	0	46	13	0.9968991779497098	false	0	"CpCp13_RS07020"	81766	0.07132364942059735
2.477746212121212	2.6886139713133884E-4	0.403592585515001	0.3247311827956989	31	4	false	"CpCp13_RS01760"	13	123.16129032258064	0	31	0	0.9968558591231464	false	0	"CpCp13_RS02475"	46690	0.11393273850377487
2.4105113636363638	8.31418179713377E-5	0.4148497348261638	0.4219219219219219	37	4	false	"CpCp13_RS00815"	13	210.0810810810811	0	37	0	0.996998911992263	false	0	"CpCp13_RS06520"	40992	0.17010613852719117
2.7088068181818183	4.390183402563997E-5	0.36916622968012586	0.31868131868131866	14	4	false	"CpCp13_RS00560"	13	94.71428571428571	0	14	0	0.9963642408123792	false	0	"CpCp13_RS00155"	7638	0.15227377124483235
2.347537878787879	0.0010109879091706401	0.4259782170229931	0.28363636363636363	127	4	false	"CpCp13_RS02960"	13	94.72	0	127	27	0.9971328981302385	false	0	"CpCp13_RS04855"	254898	0.074
2.6070075757575757	3.148008916789821E-4	0.3835815474028333	0.28	26	4	false	"CpCp13_RS10105"	13	81.26923076923077	0	26	0	0.9965808349451967	false	0	"CpCp13_RS10160"	39022	0.09983934983934983
2.3338068181818183	1.8426089841478647E-4	0.42848447961046865	0.43728813559322033	60	4	false	"CpCp13_RS02485"	13	185.18333333333334	0	60	0	0.9971621131528047	false	0	"CpCp13_RS06780"	100396	0.13676760216642048
2.705965909090909	1.5665646360514684E-4	0.3695538057742782	0.41625615763546797	38	4	false	"CpCp13_RS09120"	13	87.55172413793103	0	38	9	0.9963702852998065	false	0	"CpCp13_RS00825"	23732	0.1385312090790048
2.566287878787879	2.2822455590990325E-4	0.3896678966789668	0.30303030303030304	44	4	false	"CpCp13_RS00935"	13	80.8529411764706	0	44	10	0.9966674725983237	false	0	"CpCp13_RS02985"	39614	0.09125614128269818
2.9161931818181817	5.1661151143644305E-5	0.34291281052118855	0.32727272727272727	13	4	false	"CpCp13_RS08910"	13	36.72727272727273	0	13	2	0.9959229932301741	false	0	"CpCp13_RS08325"	4200	0.13755532856656452
2.460227272727273	1.5726855936901797E-4	0.4064665127020785	0.36541889483065954	34	4	false	"CpCp13_RS09205"	13	155.76470588235293	0	34	0	0.9968931334622825	false	0	"CpCp13_RS02675"	48068	0.13907563025210085
2.647727272727273	6.021217154618906E-5	0.37768240343347637	0.4935064935064935	22	4	false	"CpCp13_RS03765"	13	111.5	0	22	0	0.9964941972920697	false	0	"CpCp13_RS08515"	11998	0.1442432082794308
2.4332386363636362	3.585848990957689E-5	0.4109748978400467	0.49477351916376305	42	4	false	"CpCp13_RS02525"	13	210.0	0	42	0	0.9969505560928433	false	0	"CpCp13_RS02640"	19494	0.18041237113402062
2.3020833333333335	1.1085234922617337E-4	0.43438914027149317	0.3776595744680851	48	4	false	"CpCp13_RS04980"	13	197.89583333333334	0	48	0	0.997229609929078	false	0	"CpCp13_RS10120"	56802	0.13800267317526732
2.319602272727273	5.93029368817821E-4	0.4311083894672382	0.29296668429402434	70	4	false	"CpCp13_RS00100"	13	117.29032258064517	0	70	8	0.997192335589942	false	0	"CpCp13_RS00835"	147350	0.08524006001500375
2.3896780303030303	4.825732160508507E-5	0.4184664156924906	0.4330800701344243	60	4	false	"CpCp13_RS00775"	13	197.0	0	60	1	0.9970432382333979	false	0	"CpCp13_RS08985"	21686	0.1576
2.429450757575758	2.9497371864143203E-4	0.41161566946014416	0.3238095238095238	41	4	false	"CpCp13_RS07815"	13	122.0	0	41	5	0.9969586154094133	false	0	"CpCp13_RS01780"	57692	0.10141313383208644
2.728219696969697	3.6993281835326017E-4	0.36653939604304064	0.24110671936758893	33	4	false	"CpCp13_RS10490"	13	67.0	0	33	10	0.9963229368149581	false	0	"CpCp13_RS02180"	34822	0.1085899513776337
2.65625	5.95788947107044E-5	0.3764705882352941	0.4039408866995074	29	4	false	"CpCp13_RS06440"	13	123.72413793103448	0	29	0	0.9964760638297873	false	0	"CpCp13_RS04475"	16478	0.16300940438871472
2.752840909090909	1.1704965073087706E-4	0.3632610939112487	0.38	26	4	false	"CpCp13_RS09495"	13	64.36	0	26	1	0.9962705512572533	false	0	"CpCp13_RS00615"	17384	0.11534050179211469
2.812973484848485	3.383213768964222E-5	0.3554957077933008	0.34285714285714286	15	4	false	"CpCp13_RS05530"	13	86.13333333333334	0	15	0	0.9961426096067053	false	0	"CpCp13_RS07040"	6512	0.14748858447488583
2.3735795454545454	2.2325768612450423E-5	0.4213046080191502	0.4274193548387097	32	4	false	"CpCp13_RS03480"	13	228.34375	0	32	0	0.9970774903288201	false	0	"CpCp13_RS06585"	15356	0.17390993907083016
2.571969696969697	4.399060012560011E-4	0.38880706921944036	0.23255813953488372	53	4	false	"CpCp13_RS08050"	13	63.77272727272727	0	53	9	0.9966553836234687	false	0	"CpCp13_RS09615"	54678	0.07313386155129274
2.430397727272727	2.717554426480535E-4	0.4114552893045003	0.3447024673439768	58	4	false	"CpCp13_RS01545"	13	133.77358490566039	0	58	5	0.9969566005802708	false	0	"CpCp13_RS01305"	75360	0.11502457859472087
2.6576704545454546	2.686252419799688E-4	0.376269374665954	0.3411764705882353	47	4	false	"CpCp13_RS09555"	13	63.51428571428571	0	47	12	0.9964730415860735	false	0	"CpCp13_RS00035"	37488	0.09125615763546797
2.527935606060606	3.6717299197627594E-4	0.39557969657239184	0.3695121951219512	48	4	false	"CpCp13_RS09245"	13	104.4390243902439	0	48	7	0.9967490731785944	false	0	"CpCp13_RS08530"	78046	0.10879065040650407
2.3707386363636362	6.824643101742591E-4	0.42180946674655484	0.21721378409276498	176	4	false	"CpCp13_RS05105"	13	104.82165605095541	0	176	19	0.9970835348162476	false	0	"CpCp13_RS06365"	143804	0.08890725704067465
2.5643939393939394	8.568390111816515E-4	0.38995568685376664	0.2563380281690141	91	4	false	"CpCp13_RS02100"	13	69.35211267605634	0	91	20	0.9966715022566086	false	0	"CpCp13_RS00090"	137728	0.08111358207725887
2.585227272727273	3.9037557937916497E-4	0.38681318681318677	0.3782051282051282	45	4	false	"CpCp13_RS02200"	13	70.925	0	45	5	0.9966271760154739	false	0	"CpCp13_RS01120"	60348	0.08363797169811321
2.7054924242424243	1.2629034728611456E-4	0.3696184809240462	0.35714285714285715	26	4	false	"CpCp13_RS04760"	13	76.0	0	26	5	0.9963712927143777	false	0	"CpCp13_RS10360"	17018	0.11912225705329153
2.696969696969697	3.192845944933369E-4	0.3707865168539326	0.2782051282051282	51	4	false	"CpCp13_RS05055"	13	46.125	0	51	11	0.9963894261766603	false	0	"CpCp13_RS06090"	42960	0.07661960132890365
2.6728219696969697	1.8892430907154509E-4	0.3741364038972542	0.3391812865497076	20	4	false	"CpCp13_RS00485"	13	90.57894736842105	0	20	1	0.9964408043197936	false	0	"CpCp13_RS04690"	22510	0.1293984962406015
2.711174242424242	2.6497813044898135E-5	0.368843870066364	0.3787878787878788	12	4	false	"CpCp13_RS02735"	13	143.25	0	12	0	0.9963592037395229	false	0	"CpCp13_RS04695"	5438	0.21285289747399702
2.617897727272727	3.1910514026697184E-4	0.38198589256646776	0.32222222222222224	49	4	false	"CpCp13_RS06185"	13	65.5	0	49	13	0.996557664410058	false	0	"CpCp13_RS02150"	39710	0.08480857800805987
2.445075757575758	1.938488287009771E-5	0.40898528272656853	0.5053763440860215	31	4	false	"CpCp13_RS03485"	13	221.03225806451613	0	31	0	0.9969253707285622	false	0	"CpCp13_RS00320"	13092	0.1884332975827077
2.691287878787879	9.149070409401679E-6	0.37156931738212523	0.5333333333333333	10	4	false	"CpCp13_RS09200"	13	142.8	0	10	0	0.9964015151515152	false	0	"CpCp13_RS08035"	2894	0.20517241379310344
2.787878787878788	2.168111441955106E-5	0.358695652173913	0.5454545454545454	12	4	false	"CpCp13_RS04755"	13	75.25	0	12	0	0.9961960025789812	false	0	"CpCp13_RS06840"	3940	0.15515463917525774
2.4171401515151514	3.976369197156142E-5	0.4137120470127326	0.5242424242424243	45	4	false	"CpCp13_RS04225"	13	224.33333333333334	0	45	0	0.9969848081882657	false	0	"CpCp13_RS01510"	18532	0.18616874135546335
2.3693181818181817	6.68317861514947E-5	0.4220623501199041	0.3820536540240518	47	4	false	"CpCp13_RS03940"	13	196.12765957446808	0	47	0	0.9970865570599613	false	0	"CpCp13_RS02775"	36128	0.15227302761992864
2.4630681818181817	2.1189852159696237E-4	0.40599769319492507	0.2845849802371542	23	4	false	"CpCp13_RS10500"	13	133.65217391304347	0	23	0	0.9968870889748549	false	0	"CpCp13_RS08770"	38536	0.11986742054981478
2.414299242424242	5.564256550686557E-4	0.41419886252206317	0.3324468085106383	59	4	false	"CpCp13_RS09920"	13	114.125	0	59	11	0.9969908526756931	false	0	"CpCp13_RS02480"	89046	0.0955820770519263
2.3958333333333335	7.691918710177991E-5	0.41739130434782606	0.39971550497866287	39	4	false	"CpCp13_RS07190"	13	187.78947368421052	0	39	1	0.9970301418439717	false	0	"CpCp13_RS06490"	39060	0.15011148975556396
2.351325757575758	1.1436687343949865E-4	0.42529198550140956	0.42713404738721195	85	4	false	"CpCp13_RS10165"	13	193.36708860759492	0	85	6	0.9971248388136686	false	0	"CpCp13_RS06080"	55620	0.14943360788840412
2.601799242424242	6.487208225309277E-4	0.38434940855323024	0.23905723905723905	72	4	false	"CpCp13_RS05505"	13	65.21818181818182	0	72	17	0.9965919165054803	false	0	"CpCp13_RS06830"	82458	0.08276419012459621
2.399147727272727	1.2176770268029991E-5	0.4168146832445234	0.46558704453441296	39	4	false	"CpCp13_RS03815"	13	269.53846153846155	0	39	0	0.9970230899419729	false	0	"CpCp13_RS04030"	13902	0.21460068593826556
2.537405303030303	2.2573216800633242E-4	0.39410337749580143	0.32105263157894737	20	4	false	"CpCp13_RS04435"	13	98.8	0	20	0	0.9967289248871696	false	0	"CpCp13_RS01065"	25340	0.10196078431372549
2.334280303030303	5.896091557864347E-5	0.4283975659229209	0.3655913978494624	31	4	false	"CpCp13_RS10285"	13	212.32258064516128	0	31	0	0.9971611057382334	false	0	"CpCp13_RS00095"	34230	0.1535231964173256
2.3579545454545454	7.182945004414367E-5	0.42409638554216866	0.37795918367346937	54	4	false	"CpCp13_RS06715"	13	197.28	0	54	4	0.9971107350096712	false	0	"CpCp13_RS05870"	34496	0.15013698630136987
2.741950757575758	3.027214393151817E-4	0.3647038508029701	0.2849002849002849	41	4	false	"CpCp13_RS00135"	13	47.407407407407405	0	41	14	0.9962937217923921	false	0	"CpCp13_RS05335"	28822	0.08971661054994388
2.597064393939394	7.346536592699474E-4	0.38505013673655425	0.19611470860314523	55	4	false	"CpCp13_RS05195"	13	56.8936170212766	0	55	8	0.9966019906511928	false	0	"CpCp13_RS07670"	88860	0.0702995555321779
2.731534090909091	1.2666868668870907E-4	0.36609464378575146	0.4375	40	4	false	"CpCp13_RS01285"	13	59.625	0	40	8	0.9963158849129594	false	0	"CpCp13_RS08620"	22218	0.10685483870967742
2.6609848484848486	9.98799664833545E-5	0.3758007117437722	0.3567251461988304	19	4	false	"CpCp13_RS05390"	13	83.78947368421052	0	19	0	0.9964659896840747	false	0	"CpCp13_RS01550"	13466	0.11605190260970986
2.608901515151515	2.5606422697101335E-4	0.38330308529945556	0.39217758985200846	53	4	false	"CpCp13_RS02380"	13	91.31818181818181	0	53	9	0.9965768052869117	false	0	"CpCp13_RS07715"	44430	0.11515533646681188
2.3456439393939394	9.379436110478953E-5	0.42632216390795313	0.36936936936936937	37	4	false	"CpCp13_RS09140"	13	189.32432432432432	0	37	0	0.9971369277885236	false	0	"CpCp13_RS05265"	45146	0.14034419890609662
2.4332386363636362	4.1025934180348184E-4	0.4109748978400467	0.31137254901960787	59	4	false	"CpCp13_RS03435"	13	117.82352941176471	0	59	8	0.9969505560928433	false	0	"CpCp13_RS00785"	95138	0.10174743472518541
2.4588068181818183	1.4495754847529874E-4	0.4067013287117273	0.34759358288770054	36	4	false	"CpCp13_RS01105"	13	107.38235294117646	0	36	2	0.9968961557059961	false	0	"CpCp13_RS05680"	38646	0.09630704299657082
2.320549242424242	1.8710092588022437E-4	0.43093246276270153	0.3466942148760331	132	4	false	"CpCp13_RS02165"	13	159.36363636363637	0	132	11	0.9971903207607995	false	0	"CpCp13_RS06955"	64954	0.12063863464317666
2.344223484848485	7.833099045750001E-5	0.42658048879014343	0.42697414395527605	54	4	false	"CpCp13_RS06245"	13	192.59259259259258	0	54	0	0.9971399500322372	false	0	"CpCp13_RS04840"	53724	0.14297891061068493
2.425189393939394	2.0520021866007418E-5	0.41233893010542755	0.4682860998650472	39	4	false	"CpCp13_RS04685"	13	245.28205128205127	0	39	0	0.9969676821405545	false	0	"CpCp13_RS06550"	13828	0.20321628109532003
2.386837121212121	2.0858562165774103E-4	0.41896449117238643	0.3542087542087542	56	4	false	"CpCp13_RS10640"	13	132.12727272727273	0	56	1	0.9970492827208253	false	0	"CpCp13_RS03470"	67288	0.10638266725223247
2.356060606060606	6.067229746251403E-5	0.4244372990353698	0.4152823920265781	43	4	false	"CpCp13_RS10190"	13	225.06976744186048	0	43	0	0.9971147646679561	false	0	"CpCp13_RS09345"	38662	0.1699922714817677
2.456912878787879	2.0610957175049725E-5	0.4070148390826749	0.5225806451612903	31	4	false	"CpCp13_RS06700"	13	203.2258064516129	0	31	0	0.9969001853642812	false	0	"CpCp13_RS06540"	15260	0.1795280975720962
2.618844696969697	5.041933572448145E-4	0.3818477671307178	0.17663817663817663	35	4	false	"CpCp13_RS07685"	13	51.22222222222222	0	35	8	0.9965556495809156	false	0	"CpCp13_RS04385"	44848	0.06558543178261488
2.281723484848485	8.455722849071192E-4	0.43826520024901433	0.2861624259323806	178	4	false	"CpCp13_RS06610"	13	138.0328947368421	0	178	26	0.9972729287556414	false	0	"CpCp13_RS08125"	220660	0.10082753450463265
2.5890151515151514	6.162190750291616E-4	0.3862472567666423	0.3310104529616725	47	4	false	"CpCp13_RS08820"	13	87.0	0	47	5	0.996619116698904	false	0	"CpCp13_RS02905"	105380	0.10431654676258993
2.631628787878788	3.2088926765896485E-4	0.37999280316660666	0.3723076923076923	33	4	false	"CpCp13_RS03860"	13	73.07692307692308	0	33	7	0.9965284493874919	false	0	"CpCp13_RS09550"	34528	0.09453676982784356
2.6079545454545454	1.734904003196085E-4	0.38344226579520696	0.33048433048433046	33	4	false	"CpCp13_RS05170"	13	72.4074074074074	0	33	6	0.9965788201160541	false	0	"CpCp13_RS00810"	28480	0.08972417274771674
2.534090909090909	1.2150033929069678E-5	0.39461883408071746	0.4	15	4	false	"CpCp13_RS10345"	13	158.93333333333334	0	15	0	0.9967359767891683	false	0	"CpCp13_RS02980"	6368	0.15830013280212482
2.4081439393939394	8.125779771248754E-4	0.41525756979944944	0.20950102529049897	95	4	false	"CpCp13_RS03450"	13	72.98701298701299	0	95	18	0.9970039490651192	false	0	"CpCp13_RS08115"	140558	0.062169517024712934
2.671875	1.3583466530341372E-4	0.3742690058479532	0.3787878787878788	49	4	false	"CpCp13_RS10060"	13	74.63636363636364	0	49	16	0.9964428191489362	false	0	"CpCp13_RS00465"	22632	0.10879936390140471
2.7395833333333335	3.4488083837271824E-4	0.36501901140684406	0.22826086956521738	33	4	false	"CpCp13_RS00185"	13	50.75	0	33	9	0.9962987588652482	false	0	"CpCp13_RS04400"	48316	0.0903149138443256
2.589962121212121	1.3241544169033682E-4	0.3861060329067642	0.3306878306878307	38	4	false	"CpCp13_RS06005"	13	95.17857142857143	0	38	10	0.9966171018697615	false	0	"CpCp13_RS03130"	21280	0.11118991989319092
2.4417613636363638	3.598207680114017E-5	0.40954043048283884	0.48520084566596194	47	4	false	"CpCp13_RS03895"	13	184.95454545454547	0	47	3	0.9969324226305609	false	0	"CpCp13_RS09580"	17544	0.15821603546154445
2.437026515151515	0.001218784097951862	0.41033611812706433	0.2193577566711895	82	3	false	"CpCp13_RS00440"	13	72.07462686567165	0	82	15	0.9969424967762734	false	0	"CpCp13_RS08610"	192036	0.06423763535264852
2.3139204545454546	7.856882828828809E-5	0.4321669736034377	0.4281842818428184	84	4	false	"CpCp13_RS10850"	13	214.28048780487805	0	84	2	0.997204424564797	false	0	"CpCp13_RS09740"	52262	0.15572709869540555
2.351799242424242	1.0551786191648946E-4	0.4252063619891283	0.3945035460992908	48	4	false	"CpCp13_RS03360"	13	215.625	0	48	0	0.9971238313990973	false	0	"CpCp13_RS06280"	56002	0.16175918979744935
2.633522727272727	1.2762855451535455E-4	0.37971952535059333	0.391304347826087	23	4	false	"CpCp13_RS03440"	13	100.3913043478261	0	23	0	0.9965244197292069	false	0	"CpCp13_RS01340"	27392	0.12970452758117065
2.4171401515151514	7.719297757158175E-5	0.4137120470127326	0.4070707070707071	52	4	false	"CpCp13_RS07100"	13	175.82222222222222	0	52	7	0.9969848081882657	false	0	"CpCp13_RS00120"	30158	0.14627472730634128
2.7391098484848486	1.2990909979797456E-4	0.3650821089023336	0.3563218390804598	39	4	false	"CpCp13_RS02360"	13	56.43333333333333	0	39	9	0.9962997662798194	false	0	"CpCp13_RS09700"	22804	0.10489467162329616
2.2855113636363638	9.669701438430915E-5	0.437538844002486	0.4179154179154179	79	4	false	"CpCp13_RS06830"	14	196.57692307692307	0	79	1	0.9972648694390716	false	0	"CpCp13_RS05540"	59696	0.1367016154916016
2.662878787878788	0.0011834299409984813	0.37553342816500707	0.1690856313497823	68	4	false	"CpCp13_RS06760"	14	43.867924528301884	0	68	15	0.9964619600257898	false	0	"CpCp13_RS03695"	131236	0.06596680380195773
2.1917613636363638	0.0028207274168893406	0.45625405055087487	0.15737946264262054	314	4	false	"CpCp13_RS04710"	14	100.87762237762237	0	314	28	0.997464337524178	false	0	"CpCp13_RS00160"	652218	0.07074167067154444
2.366950757575758	1.892886275772589E-4	0.42248449689937984	0.3803921568627451	54	4	false	"CpCp13_RS02395"	14	189.49019607843138	0	54	3	0.9970915941328176	false	0	"CpCp13_RS08675"	66814	0.14700558268303443
2.78125	2.2399965826942972E-4	0.3595505617977528	0.18382352941176472	22	4	false	"CpCp13_RS00010"	14	43.11764705882353	0	22	5	0.9962101063829787	false	0	"CpCp13_RS02000"	21132	0.09200603318250378
2.655776515151515	2.5138872417247227E-4	0.3765377072561954	0.2857142857142857	39	4	false	"CpCp13_RS04915"	14	62.3448275862069	0	39	10	0.9964770712443585	false	0	"CpCp13_RS08435"	35024	0.08843237955490339
2.469223484848485	6.902550498088843E-4	0.4049856184084372	0.28355957767722473	64	4	false	"CpCp13_RS06965"	14	74.76923076923077	0	64	12	0.9968739925854287	false	0	"CpCp13_RS00725"	116072	0.06987778576563623
2.4275568181818183	1.4829133365852324E-5	0.41193680514921005	0.46702317290552586	34	4	false	"CpCp13_RS00325"	14	249.3235294117647	0	34	0	0.9969626450676983	false	0	"CpCp13_RS09655"	11098	0.20794289358779375
2.356534090909091	4.815590419872532E-5	0.4243520192887282	0.4255892255892256	55	4	false	"CpCp13_RS10680"	14	212.16363636363636	0	55	0	0.9971137572533849	false	0	"CpCp13_RS07895"	29154	0.16158692792356158
2.320075757575758	5.0510943557570377E-5	0.43102040816326526	0.4356060606060606	33	4	false	"CpCp13_RS09340"	14	225.84848484848484	0	33	0	0.9971913281753707	false	0	"CpCp13_RS09575"	34402	0.1605177575326829
2.2050189393939394	0.002057531939322306	0.4535108438909169	0.22796010296010297	136	4	false	"CpCp13_RS10620"	14	117.19642857142857	0	136	24	0.9974361299161831	false	0	"CpCp13_RS08550"	488580	0.074647406733394
2.787878787878788	6.0907547915156346E-5	0.358695652173913	0.41935483870967744	34	4	false	"CpCp13_RS02970"	14	67.29032258064517	0	34	3	0.9961960025789812	false	0	"CpCp13_RS02835"	17950	0.1329848272344766
2.6463068181818183	3.720028910970588E-4	0.37788513150831987	0.312807881773399	43	4	false	"CpCp13_RS02635"	14	61.13793103448276	0	43	14	0.9964972195357834	false	0	"CpCp13_RS01520"	37640	0.0843281807372176
2.690814393939394	0.0010983816416561627	0.37163469998240367	0.11738648947951273	55	3	false	"CpCp13_RS03880"	14	31.3953488372093	0	55	12	0.9964025225660864	false	0	"CpCp13_RS00715"	84492	0.05156058751529988
2.3224431818181817	5.254643790365242E-5	0.4305810397553517	0.45645821157218003	61	4	false	"CpCp13_RS03345"	14	227.864406779661	0	61	2	0.9971862911025144	false	0	"CpCp13_RS02855"	43842	0.16499957044146343
2.5918560606060606	4.582899047999321E-4	0.38582389477530143	0.1915966386554622	43	4	false	"CpCp13_RS04910"	14	64.05714285714286	0	43	8	0.9966130722114764	false	0	"CpCp13_RS07980"	52466	0.07649769585253456
2.534564393939394	6.695451485777479E-5	0.39454511488884736	0.25735294117647056	17	4	false	"CpCp13_RS09110"	14	112.52941176470588	0	17	0	0.996734969374597	false	0	"CpCp13_RS05630"	14460	0.11219283326491115
2.4985795454545454	0.0011855870390023932	0.40022740193291645	0.10569105691056911	94	4	false	"CpCp13_RS06940"	14	52.78048780487805	0	94	12	0.9968115328820115	false	0	"CpCp13_RS08725"	182910	0.05373553226367294
2.693655303030303	5.8807815719615906E-5	0.37124274916505534	0.5118279569892473	31	4	false	"CpCp13_RS07335"	14	83.64516129032258	0	31	0	0.9963964780786589	false	0	"CpCp13_RS01270"	12748	0.12908203902827559
2.3551136363636362	3.790473811171406E-5	0.42460796139927626	0.4117647058823529	34	4	false	"CpCp13_RS10670"	14	237.3235294117647	0	34	0	0.9971167794970986	false	0	"CpCp13_RS05635"	27556	0.17710711150131694
2.2353219696969697	9.245852182127626E-4	0.44736284685447997	0.251024208566108	211	4	false	"CpCp13_RS01125"	14	129.39444444444445	0	211	31	0.9973716553836234	false	0	"CpCp13_RS09485"	254316	0.0900448465166628
2.664772727272727	3.044489831630609E-5	0.3752665245202559	0.5095238095238095	21	4	false	"CpCp13_RS07480"	14	111.42857142857143	0	21	0	0.9964579303675047	false	0	"CpCp13_RS02840"	9696	0.1493680582152432
2.5198863636363638	2.0495995160968442E-4	0.3968432919954904	0.4169570267131243	56	4	false	"CpCp13_RS04380"	14	82.23809523809524	0	56	14	0.9967661992263056	false	0	"CpCp13_RS02020"	43304	0.08443336266744891
2.6770833333333335	2.863058009616463E-4	0.3735408560311284	0.3321718931475029	59	4	false	"CpCp13_RS07345"	14	53.88095238095238	0	59	17	0.9964317375886526	false	0	"CpCp13_RS06265"	36880	0.08302149827573556
2.585700757575758	2.85134741386923E-4	0.3867423548800586	0.32275132275132273	33	4	false	"CpCp13_RS01040"	14	111.32142857142857	0	33	5	0.9966261686009027	false	0	"CpCp13_RS08915"	37832	0.13081248950814167
2.613162878787879	2.814600874977731E-4	0.3826780213806849	0.36469221835075494	54	4	false	"CpCp13_RS01020"	14	71.30952380952381	0	54	12	0.9965677385557705	false	0	"CpCp13_RS07810"	47476	0.09177544891830607
2.3731060606060606	2.697949939810128E-5	0.4213886671987231	0.5061224489795918	50	4	false	"CpCp13_RS09335"	14	242.12	0	50	0	0.9970784977433914	false	0	"CpCp13_RS01075"	21764	0.18682098765432098
2.5577651515151514	1.715280976233205E-4	0.390966308774528	0.31225296442687744	31	4	false	"CpCp13_RS10880"	14	126.52173913043478	0	31	8	0.9966856060606061	false	0	"CpCp13_RS07010"	26874	0.13688123470732166
2.7135416666666665	1.5621708271079537E-5	0.3685220729366603	0.5333333333333333	16	4	false	"CpCp13_RS01345"	14	118.8125	0	16	0	0.9963541666666667	false	0	"CpCp13_RS10480"	3710	0.1816704892966361
2.399621212121212	4.492155192593371E-5	0.4167324388318864	0.51010101010101	45	4	false	"CpCp13_RS06065"	14	241.51111111111112	0	45	0	0.9970220825274018	false	0	"CpCp13_RS08665"	25462	0.19508167294920123
2.4734848484848486	3.214537691751209E-5	0.4042879019908116	0.43672014260249553	36	4	false	"CpCp13_RS10050"	14	216.0	0	36	2	0.9968649258542875	false	0	"CpCp13_RS04805"	14286	0.1940700808625337
2.5994318181818183	6.182526866802304E-4	0.38469945355191254	0.272895467160037	63	4	false	"CpCp13_RS06450"	14	64.61702127659575	0	63	16	0.9965969535783366	false	0	"CpCp13_RS01815"	86856	0.08026959164794502
2.569128787878788	3.792537084611466E-5	0.3892370070033173	0.38235294117647056	17	4	false	"CpCp13_RS01615"	14	142.64705882352942	0	17	0	0.9966614281108962	false	0	"CpCp13_RS04540"	9816	0.15371450304259635
2.4318181818181817	8.67797902894102E-4	0.4112149532710281	0.28735632183908044	78	4	false	"CpCp13_RS07640"	14	84.51724137931035	0	78	20	0.9969535783365571	false	0	"CpCp13_RS07910"	138612	0.07387870749939715
2.3854166666666665	7.965619888922509E-5	0.41921397379912667	0.4166666666666667	49	4	false	"CpCp13_RS00755"	14	205.73469387755102	0	49	0	0.997052304964539	false	0	"CpCp13_RS08195"	43648	0.16212347823290071
2.631628787878788	3.636288772124372E-4	0.37999280316660666	0.37681159420289856	33	4	false	"CpCp13_RS09930"	14	83.70833333333333	0	33	9	0.9965284493874919	false	0	"CpCp13_RS00770"	34744	0.10879930645860425
2.5104166666666665	3.568826087613975E-4	0.39834024896265563	0.3195402298850575	30	4	false	"CpCp13_RS06485"	14	99.26666666666667	0	30	0	0.9967863475177304	false	0	"CpCp13_RS07495"	65572	0.09857663025488249
2.3697916666666665	8.739614039408415E-5	0.421978021978022	0.46287762416794676	63	4	false	"CpCp13_RS02800"	14	190.14285714285714	0	63	0	0.99708554964539	false	0	"CpCp13_RS05695"	60466	0.14901477832512317
2.5104166666666665	8.125067337622468E-4	0.39834024896265563	0.18601234205113135	98	4	false	"CpCp13_RS09115"	14	63.734939759036145	0	98	15	0.9967863475177304	false	0	"CpCp13_RS05325"	129914	0.06645979119816073
2.726325757575758	1.691603505329276E-4	0.3667940257033692	0.22943722943722944	31	4	false	"CpCp13_RS06505"	14	52.63636363636363	0	31	9	0.996326966473243	false	0	"CpCp13_RS06850"	15054	0.08544864226682408
2.4483901515151514	5.7280744110290136E-5	0.4084316379810482	0.43843843843843844	37	4	false	"CpCp13_RS00425"	14	128.32432432432432	0	37	0	0.9969183188265636	false	0	"CpCp13_RS06390"	25892	0.1126640248677123
2.491950757575758	2.4276589777026686E-4	0.4012920387611628	0.3487903225806452	36	4	false	"CpCp13_RS10860"	14	100.21875	0	36	4	0.996825636686009	false	0	"CpCp13_RS00600"	53270	0.09553741658722593
2.741950757575758	3.5874698043033345E-4	0.3647038508029701	0.3333333333333333	46	4	false	"CpCp13_RS03885"	14	47.22222222222222	0	46	10	0.9962937217923921	false	0	"CpCp13_RS00395"	39870	0.08777364725320115
2.5208333333333335	0.0015700523840561057	0.396694214876033	0.20663531870428423	104	4	false	"CpCp13_RS02795"	14	67.92045454545455	0	104	16	0.9967641843971632	false	0	"CpCp13_RS00575"	231480	0.0733482230512468
2.4427083333333335	7.818744817285071E-5	0.4093816631130064	0.4222222222222222	36	4	false	"CpCp13_RS03795"	14	189.66666666666666	0	36	0	0.9969304078014185	false	0	"CpCp13_RS02645"	31950	0.1656477438136827
2.608901515151515	7.760069616210456E-5	0.38330308529945556	0.5147783251231527	37	4	false	"CpCp13_RS05830"	14	79.34482758620689	0	37	8	0.9965768052869117	false	0	"CpCp13_RS09600"	17152	0.09881049512603599
2.7083333333333335	1.6396841133561361E-4	0.3692307692307692	0.4074074074074074	37	4	false	"CpCp13_RS03715"	14	62.17857142857143	0	37	9	0.9963652482269504	false	0	"CpCp13_RS06795"	23196	0.10277449822904368
2.462121212121212	1.0442627961470409E-4	0.4061538461538462	0.382051282051282	41	4	false	"CpCp13_RS09220"	14	136.975	0	41	1	0.9968891038039974	false	0	"CpCp13_RS06905"	34046	0.12418404351767906
2.774621212121212	2.2916814694168367E-4	0.3604095563139932	0.2736842105263158	27	4	false	"CpCp13_RS07265"	15	41.6	0	27	7	0.9962242101869762	false	0	"CpCp13_RS02715"	20882	0.08648648648648649
2.413352272727273	3.951532042582576E-5	0.41436138905238373	0.46068660022148394	43	4	false	"CpCp13_RS09855"	15	234.06976744186048	0	43	0	0.9969928675048356	false	0	"CpCp13_RS08955"	26260	0.1926500143554407
2.487215909090909	2.2680908642919146E-5	0.40205596801827526	0.5586206896551724	30	4	false	"CpCp13_RS04855"	15	214.53333333333333	0	30	0	0.9968357108317214	false	0	"CpCp13_RS06305"	10706	0.19901051329622757
2.387784090909091	4.0568101174828486E-5	0.4187983343248067	0.48627450980392156	51	4	false	"CpCp13_RS06955"	15	242.98039215686273	0	51	0	0.9970472678916829	false	0	"CpCp13_RS09995"	29776	0.1943843137254902
2.7821969696969697	1.190574655660977E-4	0.359428182437032	0.33201581027667987	33	4	false	"CpCp13_RS08550"	15	52.608695652173914	0	33	10	0.9962080915538362	false	0	"CpCp13_RS02805"	14500	0.11075514874141876
2.350852272727273	1.2721634046859238E-4	0.42537764350453167	0.4406779661016949	59	4	false	"CpCp13_RS05825"	15	180.0	0	59	0	0.9971258462282399	false	0	"CpCp13_RS05840"	70112	0.13657056145675264
2.3915719696969697	4.648414161117672E-4	0.41813502276776876	0.3116701607267645	69	4	false	"CpCp13_RS03965"	15	90.77777777777777	0	69	15	0.9970392085751127	false	0	"CpCp13_RS01100"	84396	0.07368326118326118
2.366477272727273	4.1280489959979575E-5	0.42256902761104437	0.45	41	4	false	"CpCp13_RS09450"	15	247.34146341463415	0	41	0	0.9970926015473889	false	0	"CpCp13_RS03025"	30394	0.18909897814574475
2.2911931818181817	1.496036391888229E-4	0.43645381277123374	0.3228803716608595	42	4	false	"CpCp13_RS04085"	15	226.9047619047619	0	42	0	0.9972527804642166	false	0	"CpCp13_RS06275"	76070	0.1553078452462436
2.725378787878788	2.425586198603206E-4	0.3669214732453092	0.26495726495726496	34	4	false	"CpCp13_RS04455"	15	51.074074074074076	0	34	7	0.9963289813023856	false	0	"CpCp13_RS08750"	30398	0.09104113025681654
2.671401515151515	6.034063467405067E-5	0.3743353420772776	0.47780126849894294	58	4	false	"CpCp13_RS09300"	15	102.27272727272727	0	58	14	0.9964438265635075	false	0	"CpCp13_RS07665"	16560	0.1454804086383034
2.5014204545454546	2.2453689202939893E-5	0.39977285633162973	0.5454545454545454	25	4	false	"CpCp13_RS05180"	15	169.69565217391303	0	25	2	0.9968054883945842	false	0	"CpCp13_RS06025"	10100	0.16069664031620554
2.5179924242424243	2.9205316689917543E-4	0.397141782625047	0.28307692307692306	26	4	false	"CpCp13_RS01370"	15	131.57692307692307	0	26	0	0.9967702288845905	false	0	"CpCp13_RS04770"	38212	0.13101440392277044
2.6917613636363638	8.312590866732328E-5	0.37150395778364115	0.4909090909090909	11	4	false	"CpCp13_RS05805"	15	148.0909090909091	0	11	0	0.9964005077369439	false	0	"CpCp13_RS02850"	7598	0.19680851063829788
2.3224431818181817	6.312469545663067E-5	0.4305810397553517	0.4681139755766621	67	4	false	"CpCp13_RS02710"	15	240.38805970149255	0	67	0	0.9971862911025144	false	0	"CpCp13_RS03170"	46304	0.17559390774396824
2.3612689393939394	2.1281516541308496E-4	0.42350110286745535	0.3792784458834413	47	4	false	"CpCp13_RS06310"	15	168.25531914893617	0	47	0	0.9971036831076725	false	0	"CpCp13_RS03915"	84422	0.12834120453770875
2.481534090909091	1.4333526625553622E-4	0.4029765311963366	0.4426450742240216	42	4	false	"CpCp13_RS00760"	15	156.2051282051282	0	42	3	0.9968477998065765	false	0	"CpCp13_RS07970"	43542	0.14490271633128776
2.6145833333333335	6.744304148560947E-4	0.38247011952191234	0.2253968253968254	46	4	false	"CpCp13_RS08060"	15	45.55555555555556	0	46	10	0.9965647163120568	false	0	"CpCp13_RS10665"	57824	0.058329776639635796
2.7054924242424243	3.382845289629743E-5	0.3696184809240462	0.47368421052631576	19	4	false	"CpCp13_RS04745"	15	97.3157894736842	0	19	0	0.9963712927143777	false	0	"CpCp13_RS01845"	7172	0.14700270313245348
2.3451704545454546	2.2721106119801254E-4	0.42640823743185946	0.2982456140350877	41	4	false	"CpCp13_RS01435"	15	141.46153846153845	0	41	2	0.9971379352030948	false	0	"CpCp13_RS03405"	67948	0.10494179411093357
2.367424242424242	2.2549618967820944E-4	0.42240000000000005	0.4363233665559247	43	4	false	"CpCp13_RS04420"	15	170.02325581395348	0	43	0	0.9970905867182462	false	0	"CpCp13_RS08925"	62606	0.13046815042210283
2.334753787878788	8.335189541571791E-5	0.42831068748732504	0.43371378402107114	68	4	false	"CpCp13_RS04060"	15	221.73529411764707	0	68	0	0.9971600983236621	false	0	"CpCp13_RS09310"	49792	0.16510446322981912
2.287405303030303	3.5414560374337847E-4	0.437176567998344	0.3298898071625344	127	4	false	"CpCp13_RS07170"	15	168.19834710743802	0	127	6	0.9972608397807866	false	0	"CpCp13_RS05825"	133016	0.12109312246755796
2.4829545454545454	3.743797968938939E-5	0.40274599542334094	0.5015015015015015	38	4	false	"CpCp13_RS08745"	15	200.0810810810811	0	38	1	0.9968447775628626	false	0	"CpCp13_RS08840"	20686	0.18508888166612497
2.452651515151515	4.1044708019139135E-5	0.40772200772200773	0.37701612903225806	32	4	false	"CpCp13_RS00800"	15	195.5625	0	32	0	0.9969092520954224	false	0	"CpCp13_RS07930"	20010	0.17230176211453743
2.2675189393939394	1.2627507782237584E-4	0.4410106494048862	0.40461215932914046	54	4	false	"CpCp13_RS06460"	15	230.59259259259258	0	54	0	0.9973031511927789	false	0	"CpCp13_RS01070"	68616	0.15383094902774688
2.340435606060606	5.496610246809597E-5	0.4272708881246207	0.46190476190476193	36	4	false	"CpCp13_RS10370"	15	212.86111111111111	0	36	0	0.9971480093488072	false	0	"CpCp13_RS08280"	36178	0.15571405348289036
2.519412878787879	1.691443404500753E-4	0.396917872580342	0.3794466403162055	23	4	false	"CpCp13_RS10235"	15	131.34782608695653	0	23	0	0.9967672066408768	false	0	"CpCp13_RS06650"	28268	0.1300473525613431
2.4507575757575757	3.672337536213078E-5	0.4080370942812983	0.49169435215946844	43	4	false	"CpCp13_RS03055"	15	209.58139534883722	0	43	0	0.9969132817537073	false	0	"CpCp13_RS05855"	18142	0.18352136195169633
2.492897727272727	2.9248283628660154E-4	0.4011396011396012	0.3371212121212121	33	4	false	"CpCp13_RS09790"	15	118.15151515151516	0	33	0	0.9968236218568665	false	0	"CpCp13_RS06205"	56332	0.11306365086269393
2.4053030303030303	0.0013985187144944814	0.415748031496063	0.27041742286751363	77	4	false	"CpCp13_RS05355"	15	98.72413793103448	0	77	19	0.9970099935525468	false	0	"CpCp13_RS05375"	214792	0.08225574712643678
2.3584280303030303	3.254081985582244E-4	0.4240112427223449	0.32862745098039214	59	4	false	"CpCp13_RS02425"	15	143.0	0	59	8	0.9971097275951	false	0	"CpCp13_RS02815"	86116	0.10907704042715484
2.6553030303030303	3.243013324935269E-4	0.37660485021398005	0.33251231527093594	32	4	false	"CpCp13_RS05860"	15	58.37931034482759	0	32	3	0.9964780786589298	false	0	"CpCp13_RS05955"	36728	0.08176373997875012
2.5416666666666665	1.5959514238052674E-5	0.3934426229508197	0.42450142450142453	27	4	false	"CpCp13_RS00685"	15	178.25925925925927	0	27	0	0.9967198581560284	false	0	"CpCp13_RS03395"	7208	0.1734039486957775
2.330965909090909	7.761588218690803E-5	0.42900670322973794	0.44522144522144524	66	4	false	"CpCp13_RS00270"	15	222.78787878787878	0	66	0	0.997168157640232	false	0	"CpCp13_RS00790"	51878	0.16478393401470323
2.346590909090909	6.837058087891228E-5	0.4261501210653753	0.42183163737280294	47	4	false	"CpCp13_RS00590"	15	197.46808510638297	0	47	0	0.997134912959381	false	0	"CpCp13_RS07060"	39472	0.14670734406120578
2.805871212121212	6.062822538171277E-5	0.3563955450556868	0.5367965367965368	22	4	false	"CpCp13_RS00460"	15	80.5909090909091	0	22	0	0.9961577208252741	false	0	"CpCp13_RS02825"	14426	0.15802139037433155
2.406723484848485	1.2690641435741316E-4	0.4155026559118631	0.3911806543385491	40	4	false	"CpCp13_RS01475"	15	175.68421052631578	0	40	2	0.997006971308833	false	0	"CpCp13_RS02105"	41502	0.14213932890478623
2.647727272727273	0.0010373318949585685	0.37768240343347637	0.2525399129172714	77	4	false	"CpCp13_RS03585"	15	44.490566037735846	0	77	24	0.9964941972920697	false	0	"CpCp13_RS03220"	123370	0.06374006595664161
2.628314393939394	6.070251782701438E-5	0.3804719870293641	0.5268817204301075	31	4	false	"CpCp13_RS07105"	15	118.0	0	31	0	0.9965355012894906	false	0	"CpCp13_RS10330"	17622	0.15167095115681234
2.6851325757575757	1.7256313977166484E-4	0.37242108975489335	0.3105263157894737	20	4	false	"CpCp13_RS09755"	15	69.1	0	20	0	0.9964146115409414	false	0	"CpCp13_RS01165"	20950	0.10422322775263952
2.4204545454545454	7.367774142586342E-5	0.4131455399061033	0.4	47	4	false	"CpCp13_RS09420"	15	198.42222222222222	0	47	2	0.9969777562862668	false	0	"CpCp13_RS08875"	37364	0.16674136321195146
2.2073863636363638	6.320892075178218E-4	0.453024453024453	0.2500333200053312	133	4	false	"CpCp13_RS00085"	15	143.6178861788618	0	133	10	0.9974310928433269	false	0	"CpCp13_RS03965"	220310	0.09253729779565836
2.586174242424242	7.251995957155487E-4	0.386671548883193	0.33051948051948055	85	4	false	"CpCp13_RS03230"	15	78.625	0	85	29	0.9966251611863314	false	0	"CpCp13_RS09895"	96204	0.09600122100122101
2.663352272727273	3.65109105827343E-4	0.3754666666666666	0.2866666666666667	31	4	false	"CpCp13_RS02895"	15	77.76	0	31	6	0.9964609526112186	false	0	"CpCp13_RS08140"	51374	0.11172413793103449
2.7395833333333335	9.702617959546472E-5	0.36501901140684406	0.3333333333333333	21	4	false	"CpCp13_RS05970"	15	61.68421052631579	0	21	2	0.9962987588652482	false	0	"CpCp13_RS01250"	14066	0.11486817602665883
2.397727272727273	5.96396494424387E-5	0.41706161137440756	0.4536290322580645	32	4	false	"CpCp13_RS06125"	15	186.90625	0	32	0	0.9970261121856867	false	0	"CpCp13_RS02870"	27596	0.1496447157726181
2.5042613636363638	2.9018119222510495E-4	0.3993193420306296	0.39605110336817656	42	4	false	"CpCp13_RS07195"	15	121.95238095238095	0	42	0	0.9967994439071567	false	0	"CpCp13_RS05395"	61578	0.12074493163602075
2.680397727272727	1.3246253179765576E-4	0.37307896131425544	0.3333333333333333	25	4	false	"CpCp13_RS06685"	15	65.92	0	25	0	0.9964246856866538	false	0	"CpCp13_RS01055"	18206	0.09780415430267063
2.669034090909091	1.9859930411365216E-4	0.37466737626397023	0.3368421052631579	27	4	false	"CpCp13_RS01185"	15	69.15	0	27	7	0.9964488636363636	false	0	"CpCp13_RS07275"	20264	0.10021739130434783
2.521780303030303	4.8868873142913976E-5	0.39654524971836275	0.45057471264367815	31	4	false	"CpCp13_RS06215"	15	127.2	0	31	1	0.9967621695680207	false	0	"CpCp13_RS07565"	15142	0.12254335260115606
2.4365530303030303	1.4149912423113163E-4	0.4104158569762923	0.27635327635327633	27	4	false	"CpCp13_RS10090"	15	122.96296296296296	0	27	0	0.9969435041908447	false	0	"CpCp13_RS02030"	36960	0.10341712612528424
2.6695075757575757	2.735738758413946E-4	0.3746009223128769	0.2857142857142857	32	4	false	"CpCp13_RS03995"	15	61.51724137931034	0	32	3	0.9964478562217924	false	0	"CpCp13_RS09100"	38154	0.0912718714826563
2.199810606060606	8.341162473191072E-4	0.454584588893672	0.25064405324173467	153	4	false	"CpCp13_RS02050"	15	146.1970802919708	0	153	16	0.9974472114764668	false	0	"CpCp13_RS00500"	259220	0.09395699247555964
2.7959280303030303	8.272780451996468E-5	0.35766299745977986	0.4	13	4	false	"CpCp13_RS07435"	15	64.27272727272727	0	13	2	0.9961788765312702	false	0	"CpCp13_RS07150"	6766	0.13588314433980395
2.288825757575758	1.7332046925933747E-4	0.4369052544476624	0.2978723404255319	48	4	false	"CpCp13_RS08085"	15	214.58333333333334	0	48	0	0.9972578175370729	false	0	"CpCp13_RS01790"	86214	0.14707562257253826
2.643465909090909	1.8567403325218457E-4	0.3782912412681354	0.3484848484848485	47	4	false	"CpCp13_RS05990"	15	69.0	0	47	14	0.9965032640232108	false	0	"CpCp13_RS05890"	27134	0.09504132231404959
2.383996212121212	4.299215531395091E-4	0.4194637537239325	0.28784313725490196	66	3	false	"CpCp13_RS03040"	15	88.80392156862744	0	66	15	0.9970553272082527	false	0	"CpCp13_RS00140"	83458	0.07104313725490197
2.2485795454545454	0.0014366269444221747	0.4447252053063803	0.23459413514662134	215	4	false	"CpCp13_RS01580"	15	123.12637362637362	0	215	33	0.9973434477756286	false	0	"CpCp13_RS08095"	336172	0.08744770854145854
2.3920454545454546	1.7232324055377403E-4	0.4180522565320665	0.3902439024390244	42	4	false	"CpCp13_RS05030"	15	146.07142857142858	0	42	0	0.9970382011605416	false	0	"CpCp13_RS09180"	64060	0.11676373187164554
2.785037878787879	1.3109596601888925E-4	0.35906154369262155	0.36796536796536794	33	4	false	"CpCp13_RS01605"	15	47.90909090909091	0	33	11	0.9962020470664088	false	0	"CpCp13_RS09880"	12448	0.1067017614901802
2.346590909090909	9.130996654638887E-5	0.4261501210653753	0.41373283395755306	101	4	false	"CpCp13_RS06670"	15	181.06666666666666	0	101	11	0.997134912959381	false	0	"CpCp13_RS03990"	40924	0.13906810035842293
2.6231060606060606	4.005908297057578E-4	0.3812274368231047	0.2997097242380261	67	4	false	"CpCp13_RS10470"	15	70.28301886792453	0	67	14	0.9965465828497744	false	0	"CpCp13_RS07690"	56490	0.09358591060975303
2.756628787878788	2.182456799175255E-4	0.3627619374785297	0.19047619047619047	29	4	false	"CpCp13_RS06785"	15	43.333333333333336	0	29	8	0.9962624919406834	false	0	"CpCp13_RS03660"	17910	0.08414239482200647
2.352746212121212	4.94711038070188E-5	0.42503521835379354	0.4841750841750842	58	4	false	"CpCp13_RS04300"	15	225.43636363636364	0	58	3	0.9971218165699549	false	0	"CpCp13_RS04825"	30564	0.1705267501031495
2.378314393939394	6.963237943701334E-5	0.4204658570575353	0.44992743105950656	53	4	false	"CpCp13_RS01600"	15	231.0943396226415	0	53	0	0.9970674161831077	false	0	"CpCp13_RS10495"	40164	0.18239490104391595
2.4867424242424243	1.4375580225467363E-4	0.4021325209444021	0.3939393939393939	52	4	false	"CpCp13_RS01470"	15	119.86666666666666	0	52	7	0.9968367182462927	false	0	"CpCp13_RS03245"	42004	0.11329552614996849
2.4796401515151514	2.6856601155453893E-4	0.40328432308573614	0.2701612903225806	32	4	false	"CpCp13_RS00070"	15	98.46875	0	32	0	0.9968518294648614	false	0	"CpCp13_RS06925"	49066	0.0920268691588785
2.3863636363636362	3.19055552200913E-4	0.41904761904761906	0.2995391705069124	85	4	false	"CpCp13_RS01995"	15	98.06349206349206	0	85	22	0.9970502901353966	false	0	"CpCp13_RS02010"	76458	0.07940363729837414
2.4322916666666665	3.229485562746188E-5	0.411134903640257	0.46438746438746437	27	4	false	"CpCp13_RS10395"	15	195.5185185185185	0	27	0	0.9969525709219857	false	0	"CpCp13_RS01960"	22194	0.16524216524216523
2.340909090909091	9.220883381225058E-4	0.4271844660194175	0.21548098434004473	166	4	false	"CpCp13_RS03910"	15	109.17333333333333	0	166	16	0.997147001934236	false	0	"CpCp13_RS05550"	189886	0.08685229382126756
2.3929924242424243	1.475609118573484E-4	0.4178868223189553	0.26461538461538464	26	4	false	"CpCp13_RS00265"	15	131.65384615384616	0	26	0	0.9970361863313991	false	0	"CpCp13_RS09005"	40970	0.10473655223058564
2.675189393939394	2.613667480674811E-4	0.37380530973451326	0.25333333333333335	35	4	false	"CpCp13_RS01665"	16	57.96	0	35	10	0.9964357672469375	false	0	"CpCp13_RS01220"	27754	0.08606240713224368
2.4166666666666665	1.6438042026764877E-4	0.4137931034482759	0.36363636363636365	48	4	false	"CpCp13_RS07225"	16	170.53333333333333	0	48	3	0.9969858156028368	false	0	"CpCp13_RS06315"	50378	0.1428252372975991
2.566287878787879	1.6196044025625802E-4	0.3896678966789668	0.3593073593073593	23	4	false	"CpCp13_RS10385"	16	115.68181818181819	0	23	1	0.9966674725983237	false	0	"CpCp13_RS03110"	34302	0.12479160537412964
2.257575757575758	5.448742941538865E-4	0.44295302013422816	0.2524403700874289	165	4	false	"CpCp13_RS09565"	16	126.83766233766234	0	165	11	0.997324306898775	false	0	"CpCp13_RS05765"	173286	0.08938524477636528
2.559185606060606	1.8313509590991468E-4	0.3907493061979649	0.3916256157635468	29	4	false	"CpCp13_RS00865"	16	116.58620689655173	0	29	0	0.9966825838168923	false	0	"CpCp13_RS02415"	39406	0.1264492482609021
2.456912878787879	2.7580850086523855E-4	0.4070148390826749	0.32432432432432434	49	4	false	"CpCp13_RS00525"	16	108.64864864864865	0	49	12	0.9969001853642812	false	0	"CpCp13_RS03225"	50888	0.0973554199360651
2.3887310606060606	6.103145659094698E-4	0.4186323092170466	0.24685077519379844	147	4	false	"CpCp13_RS07590"	16	105.71317829457364	0	147	18	0.9970452530625403	false	0	"CpCp13_RS07430"	127912	0.08981578444738628
2.5208333333333335	5.936564097094507E-4	0.396694214876033	0.2337092731829574	68	4	false	"CpCp13_RS00985"	16	80.24561403508773	0	68	11	0.9967641843971632	false	0	"CpCp13_RS02955"	109808	0.08392057549732071
2.320075757575758	9.16618961694803E-5	0.43102040816326526	0.4102184376156979	75	4	false	"CpCp13_RS02305"	16	202.6891891891892	0	75	1	0.9971913281753707	false	0	"CpCp13_RS06760"	47210	0.14773264518162477
2.3958333333333335	9.79313044364556E-5	0.41739130434782606	0.43675751222921033	54	4	false	"CpCp13_RS00990"	16	197.83333333333334	0	54	0	0.9970301418439717	false	0	"CpCp13_RS06300"	45744	0.160840108401084
2.381155303030303	4.001195124555527E-5	0.4199642075959435	0.47044334975369456	29	4	false	"CpCp13_RS03735"	16	216.41379310344828	0	29	0	0.9970613716956802	false	0	"CpCp13_RS04025"	26366	0.1671148981493809
2.7291666666666665	6.136571800861894E-5	0.366412213740458	0.5011494252873563	30	4	false	"CpCp13_RS07355"	16	100.33333333333333	0	30	0	0.9963209219858156	false	0	"CpCp13_RS10800"	13394	0.17092561044860874
2.7476325757575757	1.4324314836292588E-4	0.36394968119937965	0.4074074074074074	27	4	false	"CpCp13_RS08850"	16	56.7037037037037	0	27	0	0.9962816328175371	false	0	"CpCp13_RS08365"	20318	0.10559348920615215
2.4242424242424243	5.816220114356603E-5	0.4125	0.4967741935483871	31	4	false	"CpCp13_RS09860"	16	174.96774193548387	0	31	0	0.996969696969697	false	0	"CpCp13_RS07055"	26548	0.14629409860826412
2.624526515151515	3.687248569193284E-5	0.3810211077034097	0.43157894736842106	23	4	false	"CpCp13_RS10215"	16	116.2	0	23	3	0.9965435606060606	false	0	"CpCp13_RS00720"	9464	0.14488778054862844
2.319602272727273	9.109789112313561E-5	0.4311083894672382	0.3937532002048131	63	4	false	"CpCp13_RS01755"	16	231.68253968253967	0	63	0	0.997192335589942	false	0	"CpCp13_RS04800"	56824	0.1680076429895139
2.625473484848485	1.7094496487382778E-4	0.38088367899008113	0.3541963015647226	50	4	false	"CpCp13_RS02540"	16	79.71052631578948	0	50	12	0.9965415457769181	false	0	"CpCp13_RS03150"	31950	0.10419676642586859
2.252840909090909	3.7256288760440464E-4	0.4438839848675914	0.34180278281911675	58	4	false	"CpCp13_RS08775"	16	184.79310344827587	0	58	0	0.9973343810444874	false	0	"CpCp13_RS08180"	130122	0.12149447958466526
2.772253787878788	1.5867216617414294E-4	0.3607173356105892	0.29239766081871343	19	4	false	"CpCp13_RS08100"	16	54.578947368421055	0	19	0	0.9962292472598323	false	0	"CpCp13_RS07965"	16946	0.11230236084037254
2.569128787878788	9.771745603704641E-4	0.3892370070033173	0.2743531202435312	100	4	false	"CpCp13_RS04645"	16	68.56164383561644	0	100	27	0.9966614281108962	false	0	"CpCp13_RS07140"	123170	0.08181580409978095
2.3134469696969697	8.83727940985635E-5	0.4322554236594351	0.39378531073446327	60	4	false	"CpCp13_RS10420"	16	213.06666666666666	0	60	0	0.9972054319793681	false	0	"CpCp13_RS02615"	69188	0.15251729897399188
2.5880681818181817	1.637617476956602E-4	0.38638858397365533	0.43478260869565216	24	4	false	"CpCp13_RS09175"	16	96.91304347826087	0	24	1	0.9966211315280464	false	0	"CpCp13_RS00055"	27380	0.11177975026327666
2.2921401515151514	1.0877804881947962E-4	0.43627349721132	0.3857589984350548	72	4	false	"CpCp13_RS03675"	16	212.31944444444446	0	72	0	0.9972507656350742	false	0	"CpCp13_RS04710"	72554	0.14889161601994702
2.3167613636363638	8.580412138626115E-4	0.4316370324954016	0.24084469393210373	108	4	false	"CpCp13_RS00300"	16	112.5632183908046	0	108	21	0.9971983800773694	false	0	"CpCp13_RS08565"	166978	0.08295005039852955
2.253314393939394	2.6678911209293955E-4	0.44379071233452405	0.35267326732673265	105	4	false	"CpCp13_RS08020"	16	188.82178217821783	0	105	4	0.9973333736299163	false	0	"CpCp13_RS05575"	127556	0.12758228525555257
2.290246212121212	0.0012506104877335114	0.4366342774446972	0.17500698909700865	169	4	false	"CpCp13_RS10570"	16	100.93197278911565	0	169	22	0.9972547952933591	false	0	"CpCp13_RS07835"	271944	0.07448854080377539
2.631155303030303	5.183207972357139E-4	0.380061184092136	0.2591093117408907	56	4	false	"CpCp13_RS06350"	16	55.53846153846154	0	56	17	0.9965294568020632	false	0	"CpCp13_RS07175"	57302	0.07495069033530571
2.7230113636363638	3.7664057126236166E-5	0.36724047991653624	0.4666666666666667	15	4	false	"CpCp13_RS09250"	16	84.06666666666666	0	15	0	0.9963340183752417	false	0	"CpCp13_RS06240"	6050	0.1375886524822695
2.5326704545454546	0.001154494795067027	0.3948401570386988	0.2410810810810811	97	4	false	"CpCp13_RS04045"	16	72.44	0	97	22	0.996738999032882	false	0	"CpCp13_RS01595"	192490	0.07916939890710382
2.3262310606060606	5.967019976458235E-5	0.42987991044168533	0.39424141749723146	43	4	false	"CpCp13_RS08540"	16	241.93023255813952	0	43	0	0.9971782317859446	false	0	"CpCp13_RS04280"	44690	0.17392540083259492
2.4588068181818183	2.3813506930912528E-5	0.4067013287117273	0.4947089947089947	28	4	false	"CpCp13_RS07725"	16	195.82142857142858	0	28	0	0.9968961557059961	false	0	"CpCp13_RS06010"	16872	0.17222641035305944
2.5179924242424243	2.6778092903052847E-4	0.397141782625047	0.35704125177809387	41	4	false	"CpCp13_RS02755"	16	96.60526315789474	0	41	3	0.9967702288845905	false	0	"CpCp13_RS08685"	61144	0.09758107389686337
2.4043560606060606	4.1271617033443035E-5	0.4159117762898779	0.33903133903133903	27	4	false	"CpCp13_RS10815"	16	183.7037037037037	0	27	0	0.9970120083816892	false	0	"CpCp13_RS06050"	22424	0.1477905902684664
2.413352272727273	5.52994626113429E-5	0.41436138905238373	0.42234848484848486	33	4	false	"CpCp13_RS08395"	16	219.6969696969697	0	33	0	0.9969928675048356	false	0	"CpCp13_RS02705"	23372	0.18052339334179926
2.566287878787879	3.3220407277270166E-4	0.3896678966789668	0.27807486631016043	46	4	false	"CpCp13_RS07230"	16	71.26470588235294	0	46	12	0.9966674725983237	false	0	"CpCp13_RS03855"	46912	0.0803435241063731
2.3702651515151514	1.7696724540411864E-5	0.4218937275269677	0.5516840882694541	42	4	false	"CpCp13_RS09540"	16	260.9047619047619	0	42	0	0.9970845422308189	false	0	"CpCp13_RS05850"	15996	0.19992702061667578
2.391098484848485	6.586339101632105E-4	0.4182178217821782	0.213682092555332	81	4	false	"CpCp13_RS09035"	16	88.66197183098592	0	81	10	0.9970402159896841	false	0	"CpCp13_RS03380"	137234	0.072614227543805
2.684185606060606	2.7535365527034747E-4	0.37255247839125066	0.39544807965860596	47	4	false	"CpCp13_RS03305"	16	81.0	0	47	9	0.9964166263700838	false	0	"CpCp13_RS02845"	38896	0.12310030395136778
2.2481060606060606	3.353766583211923E-4	0.4448188711036226	0.3108580561382479	157	4	false	"CpCp13_RS00375"	16	152.59154929577466	0	157	15	0.9973444551901999	false	0	"CpCp13_RS05515"	139428	0.10501827205490341
2.445075757575758	7.709605852311121E-4	0.40898528272656853	0.3244862008220787	170	4	false	"CpCp13_RS01155"	16	94.96946564885496	0	170	39	0.9969253707285622	false	0	"CpCp13_RS01500"	193994	0.0907062709158118
2.4005681818181817	1.6056652113047475E-4	0.41656804733727815	0.4411321890996688	92	4	false	"CpCp13_RS06225"	16	152.9390243902439	0	92	10	0.9970200676982591	false	0	"CpCp13_RS02550"	79708	0.12895364619750752
2.7552083333333335	2.1261661052259174E-4	0.36294896030245744	0.3736842105263158	28	4	false	"CpCp13_RS02390"	16	74.1	0	28	8	0.9962655141843972	false	0	"CpCp13_RS02385"	36022	0.14277456647398845
2.402462121212121	1.0193217571773393E-4	0.41623965313362243	0.43434343434343436	58	4	false	"CpCp13_RS03905"	16	191.4181818181818	0	58	3	0.9970160380399742	false	0	"CpCp13_RS04210"	40450	0.15613228533293785
2.433712121212121	4.6211576617915645E-4	0.4108949416342413	0.3503787878787879	38	4	false	"CpCp13_RS10765"	16	147.0909090909091	0	38	5	0.9969495486782721	false	0	"CpCp13_RS09280"	64028	0.12561136557720673
2.4232954545454546	4.3403351345424025E-5	0.4126611957796014	0.35064935064935066	22	4	false	"CpCp13_RS02300"	16	216.27272727272728	0	22	0	0.9969717117988395	false	0	"CpCp13_RS01700"	17168	0.17796483352038908
2.6084280303030303	1.8345041086471415E-4	0.38337266291522965	0.44761904761904764	21	4	false	"CpCp13_RS01810"	16	114.19047619047619	0	21	0	0.9965778127014829	false	0	"CpCp13_RS03295"	27484	0.13262540788673194
2.3773674242424243	3.65061671529017E-5	0.4206333399721171	0.48138297872340424	48	4	false	"CpCp13_RS07525"	16	250.75	0	48	0	0.9970694310122501	false	0	"CpCp13_RS09145"	24890	0.19513618677042802
2.398674242424242	2.954884173287546E-5	0.4168969601263324	0.39	25	4	false	"CpCp13_RS00105"	16	209.84	0	25	0	0.9970240973565442	false	0	"CpCp13_RS09695"	23938	0.167203187250996
2.7755681818181817	6.81908334057905E-5	0.3602865916069601	0.4311594202898551	35	4	false	"CpCp13_RS01015"	16	51.541666666666664	0	35	11	0.9962221953578336	false	0	"CpCp13_RS04070"	9664	0.11084229390681004
2.7201704545454546	4.911406154875939E-4	0.36762402088772844	0.23865546218487396	42	4	false	"CpCp13_RS09385"	16	45.114285714285714	0	42	7	0.9963400628626693	false	0	"CpCp13_RS03620"	50592	0.08041762159409219
2.2760416666666665	4.184447828268063E-4	0.4393592677345538	0.4158469945355191	61	4	false	"CpCp13_RS06645"	16	188.0327868852459	0	61	0	0.9972850177304964	false	0	"CpCp13_RS04015"	180080	0.12791346046615368
2.6202651515151514	2.2887714827567844E-4	0.3816407661727503	0.4657258064516129	40	4	false	"CpCp13_RS08595"	16	114.40625	0	40	8	0.9965526273372018	false	0	"CpCp13_RS06680"	34236	0.1480029107373868
2.747159090909091	8.122618076675124E-5	0.3640124095139607	0.38333333333333336	16	4	false	"CpCp13_RS05045"	16	91.75	0	16	0	0.9962826402321083	false	0	"CpCp13_RS10510"	11018	0.16804029304029305
2.4176136363636362	5.4949930420988706E-5	0.41363102232667454	0.5217706821480407	53	4	false	"CpCp13_RS09505"	16	177.30188679245282	0	53	0	0.9969838007736944	false	0	"CpCp13_RS08415"	34156	0.14962184539447496
2.683712121212121	8.832481220836684E-5	0.3726182074805928	0.4430769230769231	33	4	false	"CpCp13_RS09935"	16	121.0	0	33	7	0.9964176337846551	false	0	"CpCp13_RS05015"	15910	0.1709039548022599
2.383522727272727	6.055678849058829E-5	0.41954707985697265	0.39867109634551495	43	4	false	"CpCp13_RS04955"	16	208.1627906976744	0	43	0	0.997056334622824	false	0	"CpCp13_RS01970"	33750	0.1644255850692531
2.3304924242424243	7.645715695428745E-5	0.4290938642828119	0.40825035561877665	38	4	false	"CpCp13_RS01715"	16	206.31578947368422	0	38	0	0.9971691650548034	false	0	"CpCp13_RS05600"	49118	0.14853548558220606
2.409090909090909	9.669566660582675E-4	0.4150943396226415	0.2766233766233766	80	4	false	"CpCp13_RS02655"	16	87.07142857142857	0	80	24	0.9970019342359767	false	0	"CpCp13_RS09515"	146264	0.07298527122500299
2.3181818181818183	5.02719368083633E-5	0.4313725490196078	0.45714285714285713	50	4	false	"CpCp13_RS08430"	16	254.66	0	50	0	0.9971953578336558	false	0	"CpCp13_RS09360"	43070	0.1815110477548111
2.212594696969697	8.900382684236339E-4	0.4519580569227477	0.2675148135238759	175	4	false	"CpCp13_RS05885"	16	129.42105263157896	0	175	23	0.9974200112830433	false	0	"CpCp13_RS04430"	357542	0.08542643738058016
2.910037878787879	8.247299619688382E-5	0.3436381386267491	0.391304347826087	30	4	false	"CpCp13_RS06525"	16	45.666666666666664	0	30	6	0.9959360896196002	false	0	"CpCp13_RS01900"	10240	0.1258034894398531
2.3148674242424243	0.0010360913617653046	0.43199018204131723	0.23643023643023642	103	3	false	"CpCp13_RS10225"	16	88.21794871794872	0	103	25	0.9972024097356544	false	0	"CpCp13_RS03630"	187710	0.06443969957483471
2.344223484848485	8.386812099050249E-5	0.42658048879014343	0.403030303030303	45	4	false	"CpCp13_RS03805"	16	203.17777777777778	0	45	0	0.9971399500322372	false	0	"CpCp13_RS03595"	60128	0.150613623260028
2.393939393939394	2.942839290787357E-4	0.4177215189873418	0.29326145552560645	117	4	false	"CpCp13_RS07840"	16	127.06603773584905	0	117	11	0.9970341715022566	false	0	"CpCp13_RS02780"	76406	0.10713831175029431
2.5426136363636362	2.342770020853299E-4	0.3932960893854749	0.3803009575923393	114	4	false	"CpCp13_RS02475"	16	113.4186046511628	0	114	28	0.996717843326886	false	0	"CpCp13_RS10750"	69592	0.12772365388644458
2.320075757575758	1.327403658961079E-4	0.43102040816326526	0.39596507076181875	86	4	false	"CpCp13_RS02180"	16	188.17073170731706	0	86	4	0.9971913281753707	false	0	"CpCp13_RS06195"	68000	0.1376523275108391
2.1429924242424243	0.0038665517917617813	0.46663720724701724	0.13838912133891212	259	4	false	"CpCp13_RS04475"	16	96.40833333333333	0	259	19	0.997568101225016	false	0	"CpCp13_RS09685"	860920	0.06136749416507532
2.574337121212121	1.7160271636028536E-5	0.3884495125988597	0.42424242424242425	23	4	false	"CpCp13_RS06585"	16	165.45454545454547	0	23	1	0.9966503465506125	false	0	"CpCp13_RS08510"	7926	0.18023370964547436
2.3707386363636362	2.7608785407417824E-4	0.42180946674655484	0.3655367231638418	60	3	false	"CpCp13_RS00320"	16	153.35	0	60	0	0.9970835348162476	false	0	"CpCp13_RS09130"	96550	0.12084318360914105
2.137310606060606	0.002784359577922119	0.46787771377935317	0.18518518518518517	220	3	false	"CpCp13_RS00095"	16	115.95263157894736	0	220	30	0.997580190199871	false	0	"CpCp13_RS07865"	737252	0.07104940660474716
2.578125	2.0424736029216325E-4	0.3878787878787879	0.29473684210526313	20	4	false	"CpCp13_RS06540"	16	103.05	0	20	0	0.9966422872340426	false	0	"CpCp13_RS08525"	31144	0.11526845637583892
2.7485795454545454	2.193890979289233E-4	0.3638242894056848	0.2648221343873518	33	4	false	"CpCp13_RS09550"	16	45.52173913043478	0	33	10	0.9962796179883946	false	0	"CpCp13_RS07660"	21432	0.08745819397993311
2.280776515151515	1.2634882529931208E-4	0.43844716628607017	0.3668997668997669	66	4	false	"CpCp13_RS00810"	16	196.06060606060606	0	66	0	0.9972749435847841	false	0	"CpCp13_RS07925"	66702	0.13428808634288086
2.359375	1.0127702381065965E-4	0.423841059602649	0.25	24	4	false	"CpCp13_RS04400"	16	182.25	0	24	0	0.9971077127659574	false	0	"CpCp13_RS03105"	39620	0.1361090365944735
2.492424242424242	3.2002601417607294E-5	0.4012158054711247	0.4860215053763441	31	4	false	"CpCp13_RS09575"	16	184.90322580645162	0	31	0	0.9968246292714378	false	0	"CpCp13_RS00535"	13400	0.17410849887613147
2.315814393939394	1.524199697826822E-4	0.431813535064404	0.3458937198067633	46	4	false	"CpCp13_RS01270"	16	198.32608695652175	0	46	0	0.9972003949065119	false	0	"CpCp13_RS04175"	72832	0.14085659584980237
2.2556818181818183	0.001223595046227711	0.44332493702770776	0.18481123792800702	81	3	false	"CpCp13_RS08915"	16	107.70588235294117	0	81	13	0.99732833655706	false	0	"CpCp13_RS04395"	227364	0.07161295369211515
2.243371212121212	4.477518047399168E-4	0.44575770367243567	0.26733395891982065	156	4	false	"CpCp13_RS07010"	16	137.97122302158274	0	156	17	0.9973545293359124	false	0	"CpCp13_RS06480"	164620	0.09404991344347835
2.3636363636363638	9.621359849324987E-5	0.4230769230769231	0.3974630021141649	44	4	false	"CpCp13_RS00770"	16	203.02272727272728	0	44	0	0.9970986460348162	false	0	"CpCp13_RS04625"	52956	0.15450740279507402
2.631155303030303	2.6373799730040605E-4	0.380061184092136	0.397459165154265	77	4	false	"CpCp13_RS07495"	16	87.15517241379311	0	77	19	0.9965294568020632	false	0	"CpCp13_RS06120"	48322	0.11857846586910627
2.412878787878788	2.4511051687792704E-5	0.41444270015698587	0.4930612244897959	50	4	false	"CpCp13_RS06850"	16	237.84	0	50	0	0.9969938749194068	false	0	"CpCp13_RS03195"	17954	0.19591433278418452
2.347064393939394	6.064902219166153E-4	0.42606415170466005	0.28309409888357256	162	4	false	"CpCp13_RS02715"	16	120.50375939849624	0	162	29	0.9971339055448099	false	0	"CpCp13_RS08900"	152588	0.09571386767156174
2.309659090909091	1.0512456620206698E-4	0.43296432964329645	0.25806451612903225	32	4	false	"CpCp13_RS06305"	16	200.59375	0	32	0	0.9972134912959382	false	0	"CpCp13_RS01795"	48666	0.13988406555090654
2.3115530303030303	4.105803562416498E-5	0.43260958623514956	0.38605442176870747	49	4	false	"CpCp13_RS02805"	16	226.79591836734693	0	49	0	0.9972094616376532	false	0	"CpCp13_RS02065"	30806	0.16073417318734723
2.8484848484848486	1.802581710521406E-6	0.35106382978723405	0.4666666666666667	6	4	false	"CpCp13_RS07930"	16	112.83333333333333	0	6	0	0.9960670535138619	false	0	"CpCp13_RS02125"	578	0.25074074074074076
2.578125	8.890667848223501E-4	0.3878787878787879	0.16025641025641027	50	4	false	"CpCp13_RS06205"	16	53.6	0	50	10	0.9966422872340426	false	0	"CpCp13_RS03605"	95376	0.06283704572098477
2.4114583333333335	1.822592009148912E-4	0.4146868250539957	0.41818181818181815	45	4	false	"CpCp13_RS05955"	16	209.35555555555555	0	45	0	0.9969968971631206	false	0	"CpCp13_RS07955"	72196	0.17388335179032854
2.3764204545454546	1.8148642731182123E-4	0.42080095636580994	0.4125490196078431	51	4	false	"CpCp13_RS03395"	16	166.23529411764707	0	51	0	0.9970714458413927	false	0	"CpCp13_RS09375"	75086	0.1302784436658676
2.446969696969697	9.946697403704296E-4	0.40866873065015485	0.2548217416715371	79	4	false	"CpCp13_RS10330"	16	70.64406779661017	0	79	20	0.9969213410702773	false	0	"CpCp13_RS06620"	140990	0.06352883794659188
2.587594696969697	1.6492057790699053E-4	0.3864592863677951	0.4015873015873016	36	4	false	"CpCp13_RS08140"	16	78.19444444444444	0	36	0	0.9966221389426176	false	0	"CpCp13_RS00730"	31996	0.09297793631919672
2.430871212121212	0.0011981036685857233	0.4113751460849241	0.2350294219453098	126	4	false	"CpCp13_RS02870"	16	95.70370370370371	0	126	18	0.9969555931656996	false	0	"CpCp13_RS09450"	256510	0.08692434487166549
2.5894886363636362	3.994120551137673E-4	0.3861766319253977	0.23885918003565063	43	4	false	"CpCp13_RS07275"	16	60.44117647058823	0	43	9	0.9966181092843327	false	0	"CpCp13_RS05315"	61444	0.0723846424797464
2.584280303030303	6.538305072139301E-4	0.38695492854525465	0.2559322033898305	75	4	false	"CpCp13_RS07565"	16	73.11666666666666	0	75	15	0.9966291908446163	false	0	"CpCp13_RS02395"	89352	0.0887135922330097
2.4109848484848486	6.554479720300797E-5	0.4147682639434407	0.43197278911564624	49	4	false	"CpCp13_RS02030"	16	215.51020408163265	0	49	0	0.9969979045776918	false	0	"CpCp13_RS06990"	32224	0.1782549247987036
2.4176136363636362	2.2788414862247795E-5	0.41363102232667454	0.5514950166112956	43	4	false	"CpCp13_RS09100"	16	241.4418604651163	0	43	0	0.9969838007736944	false	0	"CpCp13_RS01865"	15314	0.19871758062972533
2.299715909090909	0.002032239278014014	0.4348363187152563	0.15960163432073546	112	4	false	"CpCp13_RS09880"	16	91.62921348314607	0	112	23	0.9972346470019342	false	0	"CpCp13_RS04545"	341296	0.06582558439881182
2.3238636363636362	7.382969646176806E-5	0.430317848410758	0.4459325396825397	64	4	false	"CpCp13_RS03660"	16	237.171875	0	64	0	0.9971832688588008	false	0	"CpCp13_RS06920"	48750	0.17286579810495628
2.474905303030303	5.9423321880766503E-5	0.4040558637841974	0.38	25	4	false	"CpCp13_RS06925"	16	129.64	0	25	0	0.9968619036105738	false	0	"CpCp13_RS07600"	18010	0.11689810640216411
2.492897727272727	3.3038212474391734E-4	0.4011396011396012	0.23908045977011494	33	4	false	"CpCp13_RS01960"	16	85.73333333333333	0	33	3	0.9968236218568665	false	0	"CpCp13_RS02595"	43744	0.08204146730462519
2.351325757575758	2.5125039800869758E-5	0.42529198550140956	0.4804964539007092	48	4	false	"CpCp13_RS02415"	16	261.75	0	48	0	0.9971248388136686	false	0	"CpCp13_RS10135"	19824	0.196656649135988
2.320075757575758	8.200377427642631E-5	0.43102040816326526	0.44593804792518993	59	4	false	"CpCp13_RS04025"	16	235.15254237288136	0	59	0	0.9971913281753707	false	0	"CpCp13_RS08800"	47676	0.17040039302382706
2.6150568181818183	1.7774154709623402E-4	0.3824008690928843	0.40606060606060607	58	4	false	"CpCp13_RS10800"	16	100.57777777777778	0	58	13	0.9965637088974855	false	0	"CpCp13_RS09260"	36122	0.126512928022362
2.695549242424242	9.151392935427254E-5	0.3709819076058318	0.43333333333333335	29	4	false	"CpCp13_RS08365"	16	88.32	0	29	4	0.9963924484203739	false	0	"CpCp13_RS07805"	18190	0.13341389728096678
2.609375	8.172967343397615E-4	0.38323353293413176	0.2365396249243799	75	4	false	"CpCp13_RS07055"	16	60.241379310344826	0	75	17	0.9965757978723404	false	0	"CpCp13_RS00010"	113480	0.07793192666280055
2.6387310606060606	2.0699721437406616E-4	0.37897003409294816	0.32019704433497537	29	4	false	"CpCp13_RS06010"	16	83.51724137931035	0	29	0	0.9965133381689233	false	0	"CpCp13_RS05895"	36572	0.11286113699906804
2.728219696969697	5.003932235229427E-4	0.36653939604304064	0.1815126050420168	44	4	false	"CpCp13_RS06050"	16	40.77142857142857	0	44	9	0.9963229368149581	false	0	"CpCp13_RS08790"	50302	0.0743482794577685
2.3238636363636362	3.945722021564813E-4	0.430317848410758	0.293719806763285	46	4	false	"CpCp13_RS02705"	16	159.3913043478261	0	46	0	0.9971832688588008	false	0	"CpCp13_RS07300"	101868	0.11508397425835819
2.277462121212121	1.6760438668197633E-4	0.4390852390852391	0.37746478873239436	72	4	false	"CpCp13_RS02385"	16	193.3943661971831	0	72	1	0.9972819954867828	false	0	"CpCp13_RS04915"	99754	0.1321902708114717
2.3797348484848486	2.2444791683316417E-4	0.4202148826104258	0.3803191489361702	54	4	false	"CpCp13_RS05015"	16	164.22916666666666	0	54	6	0.9970643939393938	false	0	"CpCp13_RS06375"	81370	0.12992813818565402
2.2457386363636362	7.826244956207627E-4	0.4452877925363694	0.2980828695114409	123	4	false	"CpCp13_RS01900"	16	137.33333333333334	0	123	24	0.9973494922630561	false	0	"CpCp13_RS08005"	225998	0.09186176142697881
2.40625	2.2493580944090624E-5	0.4155844155844156	0.4731182795698925	31	4	false	"CpCp13_RS07660"	16	236.5483870967742	0	31	0	0.9970079787234043	false	0	"CpCp13_RS01855"	15384	0.18999870449540096
2.3579545454545454	6.098513112845655E-4	0.42409638554216866	0.38747474747474747	123	4	false	"CpCp13_RS00535"	16	119.84	0	123	23	0.9971107350096712	false	0	"CpCp13_RS07270"	181182	0.09526232114467409
2.644412878787879	1.408822611271438E-4	0.37815577439570275	0.38333333333333336	56	4	false	"CpCp13_RS01795"	16	90.4	0	56	16	0.9965012491940684	false	0	"CpCp13_RS10820"	28012	0.12282608695652174
2.7073863636363638	3.454321754801816E-4	0.36935991605456453	0.28225806451612906	43	4	false	"CpCp13_RS02595"	16	45.28125	0	43	11	0.9963672630560928	false	0	"CpCp13_RS06860"	32500	0.07661802030456853
2.4824810606060606	5.107490381629015E-4	0.40282281136753767	0.2590011614401858	48	4	false	"CpCp13_RS07805"	16	86.19047619047619	0	48	6	0.9968457849774339	false	0	"CpCp13_RS01990"	73308	0.08144297416509137
2.578598484848485	2.70405208805568E-4	0.3878075651854572	0.3647959183673469	67	4	false	"CpCp13_RS05895"	16	99.34693877551021	0	67	18	0.9966412798194713	false	0	"CpCp13_RS08065"	51390	0.11646768906859344
2.428503787878788	1.1721372607304329E-4	0.41177617469292255	0.39918367346938777	59	4	false	"CpCp13_RS01855"	16	142.5	0	59	9	0.9969606302385557	false	0	"CpCp13_RS05415"	39062	0.12107051826677995
2.7329545454545454	2.090821293015092E-4	0.3659043659043659	0.3247311827956989	37	4	false	"CpCp13_RS09195"	16	44.41935483870968	0	37	6	0.9963128626692456	false	0	"CpCp13_RS08230"	22992	0.07917888563049853
2.5516098484848486	1.655815435767922E-4	0.391909445166079	0.2857142857142857	28	4	false	"CpCp13_RS01930"	16	92.54545454545455	0	28	6	0.9966987024500322	false	0	"CpCp13_RS09195"	22404	0.0986625314983524
2.5516098484848486	7.039702402143039E-4	0.391909445166079	0.34982456140350876	96	3	false	"CpCp13_RS09155"	16	93.17105263157895	0	96	20	0.9966987024500322	false	0	"CpCp13_RS09950"	124142	0.10697020968034322
2.562973484848485	3.940308727313007E-5	0.3901718086089045	0.5015384615384615	26	4	false	"CpCp13_RS02875"	16	158.23076923076923	0	26	0	0.9966745245003223	false	0	"CpCp13_RS04835"	14778	0.17198996655518395
2.371212121212121	0.0016239050786167242	0.42172523961661346	0.19498910675381265	158	4	false	"CpCp13_RS04860"	16	82.88235294117646	0	158	22	0.9970825274016764	false	0	"CpCp13_RS01300"	352754	0.06941570598088481
2.371685606060606	6.171889101251469E-4	0.42164104611698944	0.30144927536231886	57	4	false	"CpCp13_RS05945"	16	132.7173913043478	0	57	11	0.997081519987105	false	0	"CpCp13_RS05965"	102040	0.10336245428687525
2.280776515151515	1.885704356359663E-4	0.43844716628607017	0.39641807003475005	91	4	false	"CpCp13_RS00710"	16	188.816091954023	0	91	4	0.9972749435847841	false	0	"CpCp13_RS00025"	87636	0.13148752921589343
2.6931818181818183	5.590021066011719E-5	0.3713080168776371	0.3088235294117647	18	4	false	"CpCp13_RS05340"	16	88.0	0	18	1	0.9963974854932302	false	0	"CpCp13_RS10505"	8488	0.12446958981612447
2.4417613636363638	6.565111920787636E-5	0.40954043048283884	0.4534412955465587	39	4	false	"CpCp13_RS05300"	16	196.87179487179486	0	39	0	0.9969324226305609	false	0	"CpCp13_RS06900"	27686	0.1689886651260042
2.418087121212121	4.455786503171008E-5	0.41355002937145097	0.46511627906976744	43	4	false	"CpCp13_RS06725"	16	190.67441860465115	0	43	0	0.9969827933591231	false	0	"CpCp13_RS04880"	24746	0.15719243083648077
2.581912878787879	1.465003136648077E-4	0.3873097377590317	0.3940620782726046	45	4	false	"CpCp13_RS02130"	16	91.23076923076923	0	45	6	0.9966342279174726	false	0	"CpCp13_RS06165"	30782	0.10474255939238718
2.509469696969697	2.7773826428324313E-5	0.39849056603773586	0.4928774928774929	27	4	false	"CpCp13_RS06405"	16	192.55555555555554	0	27	0	0.996788362346873	false	0	"CpCp13_RS01930"	13428	0.18676581528181915
2.7613636363636362	1.6123239143009906E-4	0.36213991769547327	0.24166666666666667	20	4	false	"CpCp13_RS01835"	16	45.0	0	20	4	0.996252417794971	false	0	"CpCp13_RS08300"	12558	0.08982035928143713
2.809659090909091	2.4395921751550067E-4	0.3559150657229525	0.23	36	4	false	"CpCp13_RS07470"	16	31.48	0	36	11	0.9961496615087041	false	0	"CpCp13_RS10325"	22210	0.08082262210796916
2.461174242424242	7.124031711479908E-5	0.4063101192766449	0.45153061224489793	60	4	false	"CpCp13_RS04500"	16	156.18367346938774	0	60	11	0.99689111863314	false	0	"CpCp13_RS00965"	22316	0.14057936405885488
2.293560606060606	1.6313877639616682E-4	0.4360033030553262	0.39215686274509803	52	4	false	"CpCp13_RS05555"	16	203.15384615384616	0	52	0	0.9972477433913604	false	0	"CpCp13_RS03120"	90360	0.14059089699228108
2.459280303030303	1.2601244079783007E-4	0.4066230265691182	0.42857142857142855	43	4	false	"CpCp13_RS04945"	16	156.69767441860466	0	43	0	0.9968951482914249	false	0	"CpCp13_RS06370"	45836	0.14091517483687468
2.334280303030303	0.0019322183830485266	0.4283975659229209	0.26751316643820794	207	4	false	"CpCp13_RS03135"	16	106.67065868263474	0	207	40	0.9971611057382334	false	0	"CpCp13_RS07850"	402784	0.08595540586835998
2.7637310606060606	1.2326941245096397E-4	0.36182970704128836	0.37318840579710144	32	4	false	"CpCp13_RS03330"	16	53.375	0	32	8	0.9962473807221147	false	0	"CpCp13_RS09155"	16882	0.09884259259259259
2.5771780303030303	2.527455281425758E-4	0.38802131177659377	0.38487394957983195	35	4	false	"CpCp13_RS05150"	16	76.62857142857143	0	35	0	0.9966443020631851	false	0	"CpCp13_RS03460"	41368	0.08899950223992036
2.2679924242424243	1.4708208337769926E-4	0.44091858037578285	0.4223289865019446	95	4	false	"CpCp13_RS04125"	16	183.79787234042553	0	95	1	0.9973021437782076	false	0	"CpCp13_RS04370"	87362	0.12614816221031266
2.5838068181818183	1.352465001894451E-4	0.38702583837273224	0.41568627450980394	51	4	false	"CpCp13_RS08990"	16	120.96078431372548	0	51	0	0.9966301982591876	false	0	"CpCp13_RS07560"	39100	0.14180631220835344
2.6079545454545454	3.9752486817754844E-5	0.38344226579520696	0.47384615384615386	26	4	false	"CpCp13_RS05330"	16	116.8076923076923	0	26	0	0.9965788201160541	false	0	"CpCp13_RS01785"	12350	0.1400571850212138
2.4242424242424243	1.847530430656331E-4	0.4125	0.37945492662473795	57	4	false	"CpCp13_RS01130"	16	130.59259259259258	0	57	3	0.996969696969697	false	0	"CpCp13_RS10475"	61290	0.11200050822692333
2.3697916666666665	5.827539091899746E-5	0.421978021978022	0.48125	65	4	false	"CpCp13_RS10040"	16	230.73846153846154	0	65	0	0.99708554964539	false	0	"CpCp13_RS03190"	33802	0.17984291624198093
2.550189393939394	2.262668787307919E-5	0.3921277385815076	0.5591133004926109	29	4	false	"CpCp13_RS03010"	16	184.0344827586207	0	29	0	0.996701724693746	false	0	"CpCp13_RS02875"	10370	0.19130403613162233
2.3489583333333335	7.881610296372983E-5	0.42572062084257206	0.3853658536585366	41	4	false	"CpCp13_RS03300"	16	191.609756097561	0	41	0	0.9971298758865249	false	0	"CpCp13_RS00745"	38502	0.1427792519355894
2.4119318181818183	1.159931199421374E-4	0.414605418138987	0.42645698427382056	47	4	false	"CpCp13_RS01890"	16	227.68085106382978	0	47	0	0.9969958897485494	false	0	"CpCp13_RS09030"	57004	0.18989228612496228
2.431344696969697	3.1078171275493696E-5	0.41129503407984425	0.4642375168690958	39	4	false	"CpCp13_RS01825"	16	208.4102564102564	0	39	0	0.9969545857511283	false	0	"CpCp13_RS04220"	16024	0.1744018882094196
2.4195075757575757	1.8180890935538275E-5	0.413307240704501	0.4822190611664296	38	4	false	"CpCp13_RS04215"	16	259.2368421052632	0	38	0	0.9969797711154095	false	0	"CpCp13_RS04160"	14660	0.21231518599939653
2.3882575757575757	3.351094507080631E-5	0.41871530531324347	0.4682875264270613	44	4	false	"CpCp13_RS01730"	16	239.8409090909091	0	44	0	0.9970462604771115	false	0	"CpCp13_RS09125"	22530	0.19065255094666858
2.230587121212121	0.0024858576540881003	0.448312460199533	0.15716167890080934	274	4	false	"CpCp13_RS02750"	16	99.11462450592886	0	274	21	0.9973817295293359	false	0	"CpCp13_RS00980"	503818	0.07218836453454396
2.2755681818181817	1.1518703297985979E-4	0.4394506866416979	0.43010752688172044	105	4	false	"CpCp13_RS02135"	16	186.0	0	105	12	0.9972860251450677	false	0	"CpCp13_RS05275"	67116	0.12863070539419086
2.296875	8.512832698765061E-5	0.43537414965986393	0.41602728047740833	72	4	false	"CpCp13_RS05595"	16	189.3768115942029	0	72	3	0.9972406914893617	false	0	"CpCp13_RS06965"	57272	0.13298933398469304
2.3394886363636362	0.0013967145599607946	0.42744383727990287	0.18876678876678876	112	4	false	"CpCp13_RS00275"	16	83.4065934065934	0	112	21	0.9971500241779497	false	0	"CpCp13_RS05610"	285264	0.06371779481023178
2.803030303030303	6.630839302175756E-5	0.3567567567567567	0.375	23	4	false	"CpCp13_RS10315"	16	58.76470588235294	0	23	6	0.9961637653127015	false	0	"CpCp13_RS02945"	7062	0.12423827882104216
2.3612689393939394	9.204409182334797E-5	0.42350110286745535	0.4265232974910394	63	4	false	"CpCp13_RS07035"	16	218.84126984126985	0	63	0	0.9971036831076725	false	0	"CpCp13_RS10155"	45012	0.16898939756082612
2.475378787878788	7.663325028999782E-4	0.4039785768936495	0.20609756097560974	54	3	false	"CpCp13_RS07890"	16	69.4390243902439	0	54	13	0.9968608961960025	false	0	"CpCp13_RS00355"	93578	0.06507874825702334
2.309659090909091	1.492106119112039E-4	0.43296432964329645	0.36904761904761907	49	4	false	"CpCp13_RS00885"	16	206.20408163265307	0	49	0	0.9972134912959382	false	0	"CpCp13_RS04740"	73286	0.14552158195670648
2.5615530303030303	1.0066885552648309E-4	0.39038817005545284	0.5040404040404041	50	4	false	"CpCp13_RS03540"	16	135.7111111111111	0	50	5	0.9966775467440362	false	0	"CpCp13_RS10650"	26394	0.15028915959148517
2.3863636363636362	3.724094295274992E-5	0.41904761904761906	0.499113475177305	48	4	false	"CpCp13_RS07310"	16	247.4375	0	48	0	0.9970502901353966	false	0	"CpCp13_RS10195"	24416	0.1949862096138692
2.4739583333333335	2.2937253034960826E-4	0.40421052631578946	0.3285917496443812	56	4	false	"CpCp13_RS08905"	16	90.05263157894737	0	56	18	0.9968639184397163	false	0	"CpCp13_RS03690"	45850	0.08369203678340834
2.359375	8.939134592608317E-5	0.423841059602649	0.41025641025641024	39	4	false	"CpCp13_RS01705"	16	193.69230769230768	0	39	0	0.9971077127659574	false	0	"CpCp13_RS01760"	42700	0.14651460491097404
2.318655303030303	9.061097955418691E-5	0.43128445987339187	0.44052464947987335	70	4	false	"CpCp13_RS08355"	16	215.76119402985074	0	70	3	0.9971943504190844	false	0	"CpCp13_RS05865"	50776	0.15646206963731019
2.274147727272727	1.8312503653169032E-4	0.43972517176764525	0.35374149659863946	108	4	false	"CpCp13_RS07730"	16	162.6969696969697	0	108	9	0.9972890473887814	false	0	"CpCp13_RS02230"	80180	0.11290560006729333
2.897253787878788	3.2525781002638603E-5	0.3451544369995097	0.3611111111111111	12	4	false	"CpCp13_RS00955"	16	48.77777777777778	0	12	3	0.9959632898130238	false	0	"CpCp13_RS03425"	2862	0.16276477146042365
2.634469696969697	1.9018701023558742E-4	0.3795830337886413	0.3292307692307692	29	4	false	"CpCp13_RS05270"	16	88.1923076923077	0	29	3	0.9965224049000645	false	0	"CpCp13_RS04860"	26462	0.11335772196954716
2.409090909090909	2.9228418829881403E-5	0.4150943396226415	0.43658536585365854	41	4	false	"CpCp13_RS00690"	16	236.85365853658536	0	41	0	0.9970019342359767	false	0	"CpCp13_RS00815"	16206	0.19287757209819656
2.803030303030303	1.1236304352669848E-4	0.3567567567567567	0.2564102564102564	22	4	false	"CpCp13_RS01240"	16	47.84615384615385	0	22	9	0.9961637653127015	false	0	"CpCp13_RS10720"	10716	0.11231491513181655
2.6661931818181817	6.837220490366163E-4	0.3750665956313266	0.07051282051282051	43	4	false	"CpCp13_RS08320"	16	41.325	0	43	3	0.9964549081237911	false	0	"CpCp13_RS00560"	82498	0.060751104565537555
2.331912878787879	8.93768056074548E-5	0.4288324873096446	0.4247086247086247	70	4	false	"CpCp13_RS10520"	16	196.27272727272728	0	70	4	0.9971661428110896	false	0	"CpCp13_RS05400"	51094	0.14517213555675093
2.4389204545454546	5.1659995324605167E-5	0.4100174723354688	0.429732868757259	43	4	false	"CpCp13_RS02915"	16	193.83333333333334	0	43	1	0.9969384671179884	false	0	"CpCp13_RS02960"	23620	0.16440486287814532
2.853219696969697	4.913828985717243E-5	0.3504812479256555	0.35947712418300654	18	4	false	"CpCp13_RS04100"	16	66.38888888888889	0	18	0	0.9960569793681496	false	0	"CpCp13_RS09395"	6648	0.13576459895478302
2.4796401515151514	5.0124417799324485E-5	0.40328432308573614	0.4692218350754936	43	4	false	"CpCp13_RS04660"	16	180.57142857142858	0	43	1	0.9968518294648614	false	0	"CpCp13_RS10105"	22586	0.16566186107470512
2.393939393939394	6.872622659581136E-5	0.4177215189873418	0.44195804195804195	67	4	false	"CpCp13_RS09630"	16	185.56060606060606	0	67	1	0.9970341715022566	false	0	"CpCp13_RS03310"	30782	0.15012994017848386
2.437026515151515	6.89873340981178E-4	0.41033611812706433	0.3073873873873874	96	4	false	"CpCp13_RS08410"	16	102.98666666666666	0	96	21	0.9969424967762734	false	0	"CpCp13_RS05670"	162132	0.09211687537268932
2.347537878787879	4.5326029472772604E-5	0.4259782170229931	0.4419306184012066	52	4	false	"CpCp13_RS08490"	16	249.3846153846154	0	52	0	0.9971328981302385	false	0	"CpCp13_RS01870"	32644	0.18694498904393958
2.340435606060606	4.577078405358833E-5	0.4272708881246207	0.46697837521917007	59	4	false	"CpCp13_RS05845"	16	240.3050847457627	0	59	0	0.9971480093488072	false	0	"CpCp13_RS09705"	34476	0.17879842615012106
2.6070075757575757	2.551939086162061E-4	0.3835815474028333	0.39316239316239315	29	4	false	"CpCp13_RS05795"	16	79.74074074074075	0	29	2	0.9965808349451967	false	0	"CpCp13_RS05945"	39500	0.09832397132027218
2.4947916666666665	5.865549362708445E-4	0.40083507306889354	0.3155844155844156	68	4	false	"CpCp13_RS07445"	16	85.07142857142857	0	68	12	0.9968195921985815	false	0	"CpCp13_RS03780"	92654	0.0837966220971147
2.5009469696969697	0.0013152597172812349	0.39984854221885646	0.20307553143374038	88	4	false	"CpCp13_RS08835"	16	67.86567164179104	0	88	21	0.9968064958091554	false	0	"CpCp13_RS06430"	182798	0.06868995105444438
2.637310606060606	1.2588297087773946E-4	0.3791741472172352	0.43174603174603177	40	4	false	"CpCp13_RS01330"	16	97.13888888888889	0	40	4	0.996516360412637	false	0	"CpCp13_RS02485"	25080	0.13021298778671433
2.366950757575758	7.35737508582423E-5	0.42248449689937984	0.3761140819964349	34	4	false	"CpCp13_RS07095"	16	154.76470588235293	0	34	0	0.9970915941328176	false	0	"CpCp13_RS01460"	36972	0.118231249719139
2.6581439393939394	2.9482552537935913E-4	0.3762023512646954	0.2689655172413793	41	4	false	"CpCp13_RS00700"	16	57.766666666666666	0	41	11	0.9964720341715022	false	0	"CpCp13_RS09120"	39314	0.08252380952380953
2.3494318181818183	8.158522262398522E-5	0.42563482466747277	0.39037433155080214	39	4	false	"CpCp13_RS09720"	16	200.91176470588235	0	39	5	0.9971288684719536	false	0	"CpCp13_RS00935"	34912	0.14948792016806722
2.571969696969697	1.3989713995692058E-4	0.38880706921944036	0.4444444444444444	38	4	false	"CpCp13_RS01535"	16	113.1891891891892	0	38	1	0.9966553836234687	false	0	"CpCp13_RS03550"	36482	0.129953144878518
2.334753787878788	8.324703902984942E-5	0.42831068748732504	0.4283950617283951	83	4	false	"CpCp13_RS07575"	16	213.8641975308642	0	83	2	0.9971600983236621	false	0	"CpCp13_RS09735"	48724	0.15924363181747148
2.753787878787879	2.3540602762559443E-4	0.3631361760660247	0.2838709677419355	44	4	false	"CpCp13_RS10855"	16	47.645161290322584	0	44	13	0.9962685364281109	false	0	"CpCp13_RS08910"	24572	0.09605879292403746
2.571969696969697	4.238353644852099E-4	0.38880706921944036	0.28165007112375534	38	4	false	"CpCp13_RS06160"	16	93.71052631578948	0	38	0	0.9966553836234687	false	0	"CpCp13_RS10000"	69172	0.10734310001808646
2.678503787878788	8.281756706721671E-5	0.37334276118083787	0.39204545454545453	39	4	false	"CpCp13_RS05070"	16	77.0	0	39	6	0.9964287153449387	false	0	"CpCp13_RS09205"	17980	0.11240875912408758
2.6231060606060606	4.3750342470540453E-4	0.3812274368231047	0.20634920634920634	43	4	false	"CpCp13_RS05475"	16	53.166666666666664	0	43	7	0.9965465828497744	false	0	"CpCp13_RS03765"	47614	0.06977252843394575
2.4744318181818183	0.0011102398318069747	0.4041331802525832	0.24615384615384617	93	4	false	"CpCp13_RS06835"	16	65.68181818181819	0	93	27	0.9968629110251451	false	0	"CpCp13_RS06690"	156702	0.06285341452805568
2.6832386363636362	9.619691974520541E-5	0.3726839597670725	0.31666666666666665	16	4	false	"CpCp13_RS00315"	16	80.8125	0	16	0	0.9964186411992263	false	0	"CpCp13_RS10175"	14144	0.11866740088105728
2.7040719696969697	4.089956846995357E-5	0.3698126422693048	0.4	15	4	false	"CpCp13_RS03400"	16	86.2	0	15	0	0.9963743149580915	false	0	"CpCp13_RS07115"	6672	0.13385093167701864
2.290246212121212	7.029945526017403E-5	0.4366342774446972	0.435515873015873	64	4	false	"CpCp13_RS09535"	16	229.703125	0	64	0	0.9972547952933591	false	0	"CpCp13_RS09940"	54194	0.15929481622746186
2.559185606060606	1.9795982114027632E-4	0.3907493061979649	0.4666666666666667	25	4	false	"CpCp13_RS02090"	16	150.4	0	25	0	0.9966825838168923	false	0	"CpCp13_RS06020"	33290	0.15898520084566597
2.396780303030303	7.59121489545919E-5	0.41722639273014617	0.4182076813655761	38	4	false	"CpCp13_RS07505"	16	185.26315789473685	0	38	0	0.9970281270148291	false	0	"CpCp13_RS04270"	34974	0.1486863225479429
2.8423295454545454	5.4043980675624316E-5	0.351824087956022	0.3238095238095238	15	4	false	"CpCp13_RS04780"	16	66.8	0	15	0	0.9960801499032882	false	0	"CpCp13_RS05075"	6028	0.13801652892561983
2.3323863636363638	9.204439675308396E-5	0.4287454323995128	0.4083546462063086	73	4	false	"CpCp13_RS01215"	17	159.1014492753623	0	73	4	0.9971651353965183	false	0	"CpCp13_RS00325"	48798	0.1182031569653509
2.4976325757575757	1.7969759871419181E-4	0.4003791469194313	0.33986928104575165	20	4	false	"CpCp13_RS10425"	17	114.22222222222223	0	20	2	0.9968135477111542	false	0	"CpCp13_RS09160"	26684	0.10878306878306879
2.818655303030303	3.641558726521384E-5	0.35477910297329074	0.4263157894736842	25	4	false	"CpCp13_RS06330"	17	70.1	0	25	5	0.9961305206318504	false	0	"CpCp13_RS01650"	5314	0.15239130434782608
2.4886363636363638	2.726675253775269E-4	0.4018264840182648	0.49445865302642794	88	4	false	"CpCp13_RS05590"	17	138.55072463768116	0	88	19	0.9968326885880077	false	0	"CpCp13_RS06510"	74616	0.1365031769829371
2.6453598484848486	7.586779983239223E-4	0.3780204045104707	0.2407843137254902	68	4	false	"CpCp13_RS00305"	17	51.21568627450981	0	68	17	0.9964992343649258	false	0	"CpCp13_RS07180"	87780	0.07303292215602361
2.160037878787879	0.001717385829976197	0.4629548443665059	0.20054223265694002	295	4	false	"CpCp13_RS07960"	17	122.07462686567165	0	295	27	0.9975318343004513	false	0	"CpCp13_RS02690"	514532	0.08095134407537907
2.290246212121212	1.3922388081627905E-4	0.4366342774446972	0.4048979591836735	50	4	false	"CpCp13_RS07710"	17	217.0	0	50	0	0.9972547952933591	false	0	"CpCp13_RS09955"	92536	0.14883401920438957
2.3731060606060606	9.701956169357177E-5	0.4213886671987231	0.4620192307692308	67	4	false	"CpCp13_RS06295"	17	211.09230769230768	0	67	2	0.9970784977433914	false	0	"CpCp13_RS02040"	51630	0.16713563554418662
2.6609848484848486	3.313071114491287E-5	0.3758007117437722	0.5054945054945055	14	4	false	"CpCp13_RS05620"	17	153.85714285714286	0	14	0	0.9964659896840747	false	0	"CpCp13_RS04325"	5222	0.20651965484180249
2.3077651515151514	4.240192613373085E-5	0.4333196553139106	0.45073375262054505	54	4	false	"CpCp13_RS01745"	17	250.2962962962963	0	54	0	0.9972175209542231	false	0	"CpCp13_RS04790"	33362	0.177012939389177
2.337594696969697	9.042862274095144E-5	0.42779015596516107	0.3663865546218487	40	4	false	"CpCp13_RS04485"	17	176.2	0	40	5	0.9971540538362347	false	0	"CpCp13_RS02525"	38348	0.1287070854638422
2.2518939393939394	0.002299081561021886	0.4440706476030277	0.13810372633902046	172	4	false	"CpCp13_RS02865"	17	86.27922077922078	0	172	18	0.9973363958736299	false	0	"CpCp13_RS01195"	456244	0.06025085249945585
2.6070075757575757	3.155202511741978E-4	0.3835815474028333	0.3741109530583215	48	4	false	"CpCp13_RS01860"	17	88.57894736842105	0	48	10	0.9965808349451967	false	0	"CpCp13_RS10295"	52484	0.11170106856043008
2.387784090909091	1.4815257511915293E-4	0.4187983343248067	0.39964912280701753	83	4	false	"CpCp13_RS02520"	17	164.96052631578948	0	83	7	0.9970472678916829	false	0	"CpCp13_RS05345"	64400	0.13466165413533834
2.2926136363636362	7.71130410593484E-5	0.436183395291202	0.4228438228438228	66	4	false	"CpCp13_RS10445"	17	253.74242424242425	0	66	0	0.9972497582205029	false	0	"CpCp13_RS06910"	57824	0.17707077755926326
2.664299242424242	1.295498390408296E-4	0.37533321485693977	0.3567251461988304	22	4	false	"CpCp13_RS00580"	17	73.6842105263158	0	22	3	0.9964589377820761	false	0	"CpCp13_RS04185"	14226	0.10107573460399971
2.3413825757575757	5.920690032186226E-5	0.427098078867543	0.4519230769230769	65	4	false	"CpCp13_RS03465"	17	228.73846153846154	0	65	0	0.9971459945196648	false	0	"CpCp13_RS04310"	41412	0.17095550189720593
2.431344696969697	2.3259190617726033E-4	0.41129503407984425	0.2774822695035461	57	4	false	"CpCp13_RS08150"	17	99.35416666666667	0	57	9	0.9969545857511283	false	0	"CpCp13_RS05235"	55172	0.08528254649499285
2.8020833333333335	8.856256214270463E-5	0.35687732342007433	0.44	33	4	false	"CpCp13_RS07825"	17	49.76	0	33	8	0.996165780141844	false	0	"CpCp13_RS00710"	11134	0.11257918552036199
2.652462121212121	6.375452530454979E-4	0.3770082113530882	0.21829268292682927	54	4	false	"CpCp13_RS08400"	17	47.65853658536585	0	54	13	0.9964841231463571	false	0	"CpCp13_RS02890"	65518	0.06779308191374944
2.4801136363636362	1.2121770221938688E-4	0.4032073310423826	0.4640151515151515	33	4	false	"CpCp13_RS04875"	17	176.75757575757575	0	33	0	0.9968508220502902	false	0	"CpCp13_RS05340"	35462	0.16231182346884826
2.358901515151515	5.904557699078664E-5	0.4239261340826977	0.45587375803623614	59	4	false	"CpCp13_RS04200"	17	233.76271186440678	0	59	0	0.9971087201805288	false	0	"CpCp13_RS06950"	35350	0.1794034626741418
2.558712121212121	1.6221114680092994E-4	0.3908216136195411	0.3954802259887006	68	4	false	"CpCp13_RS00400"	17	118.85	0	68	8	0.9966835912314636	false	0	"CpCp13_RS00345"	47480	0.1350568181818182
2.409090909090909	3.726241906631038E-5	0.4150943396226415	0.4492753623188406	46	4	false	"CpCp13_RS04885"	17	236.30434782608697	0	46	0	0.9970019342359767	false	0	"CpCp13_RS08995"	23336	0.1941695544996606
2.562973484848485	4.994731287760654E-4	0.3901718086089045	0.3568075117370892	95	4	false	"CpCp13_RS02940"	17	99.27777777777777	0	95	23	0.9966745245003223	false	0	"CpCp13_RS05245"	99686	0.1157083657083657
2.6695075757575757	1.1922865215412534E-4	0.3746009223128769	0.3916256157635468	41	4	false	"CpCp13_RS09190"	17	74.55172413793103	0	41	12	0.9964478562217924	false	0	"CpCp13_RS04980"	21812	0.10899374873966526
2.1548295454545454	0.003440646777176579	0.46407382992748847	0.17881198998799372	349	3	false	"CpCp13_RS05020"	17	112.54458598726114	0	349	35	0.997542915860735	false	0	"CpCp13_RS02810"	815006	0.07650889598046305
2.546401515151515	5.409674671166797E-4	0.3927110449981406	0.270935960591133	29	4	false	"CpCp13_RS09230"	17	75.82758620689656	0	29	0	0.996709784010316	false	0	"CpCp13_RS05300"	62880	0.08141042260824476
2.4981060606060606	5.922833154392678E-5	0.400303260045489	0.47597597597597596	41	4	false	"CpCp13_RS02530"	17	157.0810810810811	0	41	4	0.9968125402965828	false	0	"CpCp13_RS00100"	22652	0.15002968584630474
2.274147727272727	6.93110971791644E-4	0.43972517176764525	0.2980392156862745	58	3	false	"CpCp13_RS06615"	17	113.47058823529412	0	58	7	0.9972890473887814	false	0	"CpCp13_RS06880"	158782	0.07656584901166945
2.5677083333333335	4.598086576357921E-4	0.3894523326572008	0.2620689655172414	39	4	false	"CpCp13_RS04815"	17	69.4	0	39	9	0.9966644503546099	false	0	"CpCp13_RS00775"	49138	0.0780652418447694
2.8295454545454546	3.550615908379551E-5	0.3534136546184739	0.5151515151515151	26	4	false	"CpCp13_RS09400"	17	75.13636363636364	0	26	4	0.9961073500967118	false	0	"CpCp13_RS10715"	5544	0.15986460348162476
2.6770833333333335	1.3535723870798167E-4	0.3735408560311284	0.37846153846153846	26	4	false	"CpCp13_RS10065"	17	77.92307692307692	0	26	0	0.9964317375886526	false	0	"CpCp13_RS01170"	20822	0.117001617001617
2.7604166666666665	2.977505170270023E-4	0.36226415094339626	0.2391304347826087	37	4	false	"CpCp13_RS01080"	17	41.0	0	37	13	0.9962544326241134	false	0	"CpCp13_RS04890"	22908	0.08102766798418973
2.575284090909091	9.447873515934911E-4	0.38830667402095975	0.1889483065953654	44	4	false	"CpCp13_RS10865"	17	56.3235294117647	0	44	10	0.99664833172147	false	0	"CpCp13_RS07815"	80580	0.06503871756554816
2.4204545454545454	1.0868265709455534E-4	0.4131455399061033	0.43521594684385384	43	4	false	"CpCp13_RS07935"	17	210.46511627906978	0	43	0	0.9969777562862668	false	0	"CpCp13_RS10490"	48496	0.1767129439790678
2.3617424242424243	1.814803001379342E-4	0.4234161988773055	0.44148936170212766	48	4	false	"CpCp13_RS06325"	17	214.77083333333334	0	48	0	0.9971026756931012	false	0	"CpCp13_RS04580"	81538	0.16495455709165385
2.391098484848485	2.3518977209059454E-4	0.4182178217821782	0.4325753569539926	62	4	false	"CpCp13_RS06015"	17	158.56451612903226	0	62	0	0.9970402159896841	false	0	"CpCp13_RS04995"	93914	0.1293348418670736
2.481534090909091	1.2812004479765995E-4	0.4029765311963366	0.4213709677419355	32	4	false	"CpCp13_RS10565"	17	188.5	0	32	0	0.9968477998065765	false	0	"CpCp13_RS06725"	38404	0.17325367647058823
2.297348484848485	0.0014021674907661941	0.43528441879637264	0.1598086124401914	227	4	false	"CpCp13_RS08635"	17	94.17619047619047	0	227	17	0.9972396840747905	false	0	"CpCp13_RS00695"	288214	0.07369028988747299
2.277462121212121	5.178662365547982E-4	0.4390852390852391	0.24985994397759104	101	4	false	"CpCp13_RS05430"	17	129.27058823529413	0	101	16	0.9972819954867828	false	0	"CpCp13_RS01640"	156682	0.0893987470506875
2.605587121212121	5.59505280866956E-4	0.38379065964019626	0.20855614973262032	44	4	false	"CpCp13_RS10695"	17	54.44117647058823	0	44	10	0.9965838571889104	false	0	"CpCp13_RS06440"	52968	0.06779723097208995
2.7978219696969697	1.1511051082378532E-4	0.3574208833982061	0.3202614379084967	18	4	false	"CpCp13_RS07295"	17	45.833333333333336	0	18	0	0.9961748468729851	false	0	"CpCp13_RS07145"	12898	0.10512232415902141
2.5293560606060606	0.0010912824692096814	0.39535754399101464	0.21091581868640147	58	4	false	"CpCp13_RS10730"	17	71.44680851063829	0	58	11	0.9967460509348807	false	0	"CpCp13_RS09085"	114846	0.07520716685330348
2.174715909090909	0.0015799910885193745	0.4598301763553233	0.2074503093326313	247	4	false	"CpCp13_RS10535"	17	117.79439252336448	0	247	33	0.9975006044487427	false	0	"CpCp13_RS02170"	433304	0.07693951177228249
2.4356060606060606	5.014401590591289E-5	0.4105754276827372	0.45376955903271693	38	4	false	"CpCp13_RS02235"	17	205.57894736842104	0	38	0	0.9969455190199871	false	0	"CpCp13_RS04360"	20672	0.17600937274693584
2.331439393939394	3.8562362033809386E-4	0.4289195775792039	0.33564356435643566	110	3	false	"CpCp13_RS08740"	17	139.46534653465346	0	110	9	0.9971671502256609	false	0	"CpCp13_RS09265"	119028	0.10638088980522767
2.475852272727273	9.053452561650885E-5	0.40390131956397013	0.32	26	4	false	"CpCp13_RS07290"	17	143.34615384615384	0	26	0	0.9968598887814314	false	0	"CpCp13_RS03350"	22736	0.1301963250192133
2.2523674242424243	3.3747230972957707E-4	0.44397729661551394	0.3668997668997669	66	4	false	"CpCp13_RS08765"	17	187.34848484848484	0	66	0	0.9973353884590587	false	0	"CpCp13_RS04275"	180804	0.12366236623662366
2.303977272727273	1.2958695664005054E-4	0.43403205918618987	0.39063591893780575	54	4	false	"CpCp13_RS08220"	17	196.42592592592592	0	54	0	0.9972255802707931	false	0	"CpCp13_RS03390"	84582	0.13852321997597034
2.524621212121212	8.226936319882008E-5	0.3960990247561891	0.3935483870967742	31	4	false	"CpCp13_RS03495"	17	136.1290322580645	0	31	0	0.9967561250805932	false	0	"CpCp13_RS02130"	25320	0.13736532013931838
2.4417613636363638	5.107304022805134E-4	0.40954043048283884	0.2821461609620722	64	4	false	"CpCp13_RS02465"	17	92.65957446808511	0	64	17	0.9969324226305609	false	0	"CpCp13_RS01095"	83904	0.08178250173705658
2.3238636363636362	3.542553833590677E-4	0.430317848410758	0.39186507936507936	64	4	false	"CpCp13_RS10540"	17	151.921875	0	64	0	0.9971832688588008	false	0	"CpCp13_RS07415"	118958	0.11129807692307692
2.4171401515151514	4.1934246030689144E-5	0.4137120470127326	0.45420906567992597	48	4	false	"CpCp13_RS07245"	17	212.5744680851064	0	48	1	0.9969848081882657	false	0	"CpCp13_RS04820"	19276	0.1769978918277322
2.554924242424242	7.606094046079968E-4	0.3914010378057821	0.2416326530612245	73	4	false	"CpCp13_RS08700"	17	59.6	0	73	23	0.9966916505480335	false	0	"CpCp13_RS10680"	89416	0.06689113355780023
2.3645833333333335	2.3044605473892868E-4	0.4229074889867841	0.30357142857142855	66	4	false	"CpCp13_RS08165"	17	137.6875	0	66	2	0.9970966312056738	false	0	"CpCp13_RS04365"	80688	0.10681730023273855
2.353219696969697	3.238271637910113E-5	0.42494969818913486	0.47429078014184395	48	4	false	"CpCp13_RS01775"	17	224.8125	0	48	0	0.9971208091553836	false	0	"CpCp13_RS05520"	24902	0.1691591422121896
2.4015151515151514	5.394954803628331E-5	0.416403785488959	0.4459770114942529	30	4	false	"CpCp13_RS02650"	17	183.23333333333332	0	30	0	0.9970180528691167	false	0	"CpCp13_RS06405"	27078	0.14741217484580316
2.3267045454545454	1.236334766284098E-4	0.4297924297924298	0.37119908204245555	97	4	false	"CpCp13_RS06385"	17	166.9404761904762	0	97	13	0.9971772243713732	false	0	"CpCp13_RS05920"	53360	0.12384308322735622
2.312973484848485	1.268458076827824E-4	0.4323439099283521	0.4053236539624924	58	4	false	"CpCp13_RS02885"	17	201.58620689655172	0	58	0	0.9972064393939394	false	0	"CpCp13_RS01940"	72090	0.14368225723203973
2.340435606060606	9.121745014592535E-5	0.4272708881246207	0.45194805194805193	56	4	false	"CpCp13_RS04960"	17	210.64285714285714	0	56	0	0.9971480093488072	false	0	"CpCp13_RS08470"	48960	0.1570789389581336
2.3641098484848486	6.458588402833325E-4	0.42299218906469055	0.2721598002496879	111	4	false	"CpCp13_RS03770"	17	120.54444444444445	0	111	21	0.9970976386202449	false	0	"CpCp13_RS09460"	148350	0.0958222928811164
2.274621212121212	1.6048419044614414E-4	0.4396336386344713	0.40035087719298246	85	4	false	"CpCp13_RS10725"	17	176.42105263157896	0	85	9	0.9972880399742102	false	0	"CpCp13_RS02610"	100298	0.12058855272151671
2.374526515151515	4.9340755652295896E-5	0.42113659022931205	0.44534412955465585	39	4	false	"CpCp13_RS02245"	17	198.71794871794873	0	39	0	0.9970754754996777	false	0	"CpCp13_RS09495"	24370	0.15333175055397277
2.4673295454545454	0.0013302924616342363	0.4052964881980426	0.15169082125603864	57	4	false	"CpCp13_RS07160"	17	61.73913043478261	0	57	11	0.9968780222437137	false	0	"CpCp13_RS08720"	119378	0.0571658615136876
2.4275568181818183	5.477899025210639E-4	0.41193680514921005	0.35412262156448204	52	4	false	"CpCp13_RS09380"	17	109.25	0	52	8	0.9969626450676983	false	0	"CpCp13_RS10240"	90194	0.09345594525235244
2.3025568181818183	1.0299097353110644E-4	0.4342998149290561	0.4567287784679089	70	4	false	"CpCp13_RS10075"	17	229.0142857142857	0	70	0	0.9972286025145067	false	0	"CpCp13_RS02670"	64616	0.16230636833046472
2.250473484848485	1.458308567110482E-4	0.444350936250789	0.407581545694975	83	4	false	"CpCp13_RS00005"	17	216.9879518072289	0	83	0	0.9973394181173436	false	0	"CpCp13_RS04090"	96424	0.1443698947486553
2.3806818181818183	1.7522779693856196E-4	0.4200477326968973	0.43365384615384617	67	4	false	"CpCp13_RS09520"	17	198.13846153846154	0	67	2	0.9970623791102514	false	0	"CpCp13_RS08810"	80346	0.15889211029547837
2.7168560606060606	2.2750622886957635E-4	0.3680724991286162	0.38446969696969696	46	4	false	"CpCp13_RS09430"	17	83.75757575757575	0	46	13	0.996347114764668	false	0	"CpCp13_RS10265"	34944	0.12945529483396562
2.6415719696969697	2.937705187701128E-4	0.3785624663918265	0.29838709677419356	45	4	false	"CpCp13_RS02680"	17	55.34375	0	45	13	0.9965072936814957	false	0	"CpCp13_RS02005"	36130	0.07602163461538461
2.472064393939394	1.0135626366393396E-4	0.40452020685692397	0.47394957983193275	35	4	false	"CpCp13_RS04920"	17	165.17142857142858	0	35	0	0.9968679480980013	false	0	"CpCp13_RS09870"	33772	0.15056648001041803
2.303977272727273	1.267567606864559E-4	0.43403205918618987	0.3960927960927961	93	4	false	"CpCp13_RS04165"	17	195.45054945054946	0	93	2	0.9972255802707931	false	0	"CpCp13_RS09170"	59988	0.14122149526773803
2.562973484848485	4.241379562665954E-4	0.3901718086089045	0.30853658536585366	51	4	false	"CpCp13_RS05935"	17	73.95121951219512	0	51	10	0.9966745245003223	false	0	"CpCp13_RS05665"	64556	0.08244283111727438
2.3489583333333335	6.851402106834584E-5	0.42572062084257206	0.4576271186440678	60	4	false	"CpCp13_RS07615"	17	239.86666666666667	0	60	0	0.9971298758865249	false	0	"CpCp13_RS01400"	44154	0.18157961140550088
2.3304924242424243	7.96173594629856E-5	0.4290938642828119	0.4573820395738204	73	4	false	"CpCp13_RS10100"	17	231.02739726027397	0	73	0	0.9971691650548034	false	0	"CpCp13_RS09340"	46458	0.17087825241144525
2.3806818181818183	5.382962104446116E-5	0.4200477326968973	0.48926553672316386	60	4	false	"CpCp13_RS09215"	17	217.66666666666666	0	60	0	0.9970623791102514	false	0	"CpCp13_RS03810"	34730	0.17343957503320054
2.363162878787879	2.1867131614274952E-4	0.42316169104387896	0.3858350951374207	44	4	false	"CpCp13_RS04305"	17	187.38636363636363	0	44	0	0.9970996534493874	false	0	"CpCp13_RS05530"	72672	0.14315230224321132
2.375	6.336676406185158E-5	0.42105263157894735	0.45737425404944587	76	4	false	"CpCp13_RS02455"	17	189.42028985507247	0	76	7	0.9970744680851064	false	0	"CpCp13_RS08960"	33606	0.14938508663649247
2.315814393939394	5.946840817832231E-5	0.431813535064404	0.4	50	4	false	"CpCp13_RS02830"	17	237.72	0	50	0	0.9972003949065119	false	0	"CpCp13_RS07940"	44544	0.16919572953736656
2.265151515151515	0.0012954149259268113	0.4414715719063545	0.2542016806722689	142	4	false	"CpCp13_RS01750"	17	112.0	0	142	22	0.997308188265635	false	0	"CpCp13_RS04085"	326856	0.07815771109560363
2.5681818181818183	2.659900197584977E-4	0.3893805309734513	0.4236559139784946	31	4	false	"CpCp13_RS05080"	17	110.70967741935483	0	31	0	0.9966634429400387	false	0	"CpCp13_RS01835"	50552	0.12260207909120137
2.194128787878788	0.0023848724594449995	0.45576176089771253	0.17846058348851646	208	4	false	"CpCp13_RS05385"	17	110.88888888888889	0	208	28	0.9974593004513217	false	0	"CpCp13_RS05640"	573274	0.072666375418669
2.2608901515151514	1.7694344348729234E-4	0.442303664921466	0.37757731958762886	102	4	false	"CpCp13_RS07455"	17	181.8041237113402	0	102	5	0.9973172549967764	false	0	"CpCp13_RS00645"	118178	0.12367627463356477
2.5520833333333335	9.820910391690977E-4	0.39183673469387753	0.22901849217638692	46	4	false	"CpCp13_RS08975"	17	63.21052631578947	0	46	8	0.996697695035461	false	0	"CpCp13_RS06895"	95998	0.06938586862325957
2.303030303030303	1.9692309200444456E-4	0.43421052631578944	0.3835294117647059	51	4	false	"CpCp13_RS04035"	17	169.01960784313727	0	51	0	0.9972275950999355	false	0	"CpCp13_RS05160"	86882	0.11877695561710278
2.5946969696969697	2.4051394593760435E-4	0.3854014598540146	0.38746438746438744	27	4	false	"CpCp13_RS06220"	17	89.07407407407408	0	27	0	0.996607027724049	false	0	"CpCp13_RS07470"	42036	0.10667553781326236
2.3925189393939394	6.232774092553364E-4	0.4179695230556105	0.31517715494447385	84	3	false	"CpCp13_RS09090"	17	108.91935483870968	0	84	22	0.9970371937459703	false	0	"CpCp13_RS00260"	120362	0.08920504081794405
2.5572916666666665	3.3069012134096795E-4	0.39103869653767825	0.32447397563676633	43	4	false	"CpCp13_RS06705"	17	73.25581395348837	0	43	0	0.9966866134751773	false	0	"CpCp13_RS03480"	58130	0.08175872093023256
2.6117424242424243	1.076609317166216E-4	0.3828861493836113	0.4739756367663344	55	4	false	"CpCp13_RS04195"	17	102.0	0	55	12	0.9965707607994841	false	0	"CpCp13_RS03430"	26536	0.12895069532237674
2.6515151515151514	2.5416915150706953E-4	0.37714285714285717	0.35079365079365077	36	4	false	"CpCp13_RS10160"	17	59.77777777777778	0	36	0	0.9964861379754997	false	0	"CpCp13_RS08350"	37024	0.08527500396259312
2.349905303030303	7.058829699419189E-5	0.4255490630666935	0.48221153846153847	65	4	false	"CpCp13_RS08515"	17	238.8	0	65	0	0.9971278610573823	false	0	"CpCp13_RS06115"	43484	0.1817351598173516
2.7599431818181817	3.9347054568234044E-4	0.3623262995367988	0.2566137566137566	44	4	false	"CpCp13_RS00615"	17	41.5	0	44	16	0.9962554400386847	false	0	"CpCp13_RS08050"	52416	0.08283433133732535
2.6458333333333335	3.079197819669132E-4	0.3779527559055118	0.33793103448275863	32	4	false	"CpCp13_RS10360"	17	59.4	0	32	2	0.9964982269503546	false	0	"CpCp13_RS04500"	41804	0.08070652173913044
2.8304924242424243	2.0698206534131426E-4	0.35329541652726665	0.24561403508771928	26	4	false	"CpCp13_RS04690"	17	36.421052631578945	0	26	7	0.9961053352675693	false	0	"CpCp13_RS07365"	16366	0.10258697591436218
2.386837121212121	0.0014414589452496896	0.41896449117238643	0.19103641456582632	140	4	false	"CpCp13_RS08770"	17	82.15833333333333	0	140	20	0.9970492827208253	false	0	"CpCp13_RS04455"	205828	0.06973684210526315
2.440814393939394	4.755780422372127E-5	0.40969932104752665	0.46050420168067224	35	4	false	"CpCp13_RS01065"	17	189.77142857142857	0	35	0	0.9969344374597034	false	0	"CpCp13_RS03740"	21246	0.16192101413944418
2.2959280303030303	2.3154510995654633E-4	0.4355537224169932	0.33436486884762745	123	4	false	"CpCp13_RS01550"	17	161.57264957264957	0	123	6	0.9972427063185042	false	0	"CpCp13_RS09750"	84394	0.11742198370105347
2.390151515151515	3.480200516169937E-5	0.4183835182250396	0.4671985815602837	48	4	false	"CpCp13_RS01340"	17	231.9375	0	48	0	0.9970422308188266	false	0	"CpCp13_RS01880"	22250	0.18495813397129188
2.4114583333333335	2.2868392956374196E-4	0.4146868250539957	0.331225534477567	97	4	false	"CpCp13_RS02000"	17	120.40243902439025	0	97	15	0.9969968971631206	false	0	"CpCp13_RS10230"	60114	0.10299609839554341
2.3551136363636362	0.001609573459408643	0.42460796139927626	0.2788835506749028	127	4	false	"CpCp13_RS02840"	17	89.73404255319149	0	127	33	0.9971167794970986	false	0	"CpCp13_RS09300"	267480	0.07071240547926831
2.589962121212121	0.0010709431675748435	0.3861060329067642	0.193446088794926	60	4	false	"CpCp13_RS06025"	17	52.54545454545455	0	60	16	0.9966171018697615	false	0	"CpCp13_RS01260"	123620	0.06381862366066497
2.3925189393939394	5.653562978901627E-5	0.4179695230556105	0.4305194805194805	57	4	false	"CpCp13_RS04770"	17	215.21428571428572	0	57	1	0.9970371937459703	false	0	"CpCp13_RS08680"	33136	0.17426257952573743
2.340909090909091	3.6346682147442495E-4	0.4271844660194175	0.31276467029643074	69	4	false	"CpCp13_RS01845"	17	139.18965517241378	0	69	11	0.997147001934236	false	0	"CpCp13_RS04255"	90106	0.10418387363204626
2.524621212121212	3.6035314685582215E-4	0.3960990247561891	0.34494773519163763	54	4	false	"CpCp13_RS06650"	17	85.33333333333333	0	54	12	0.9967561250805932	false	0	"CpCp13_RS09350"	62818	0.08852005532503458
2.4829545454545454	0.0017426962611529083	0.40274599542334094	0.28339995792131284	123	4	false	"CpCp13_RS02825"	17	90.1734693877551	0	123	25	0.9968447775628626	false	0	"CpCp13_RS01235"	301670	0.09044480379915255
2.2803030303030303	4.600880527852016E-4	0.43853820598006643	0.3301141352063213	75	4	false	"CpCp13_RS01165"	17	150.16176470588235	0	75	7	0.9972759509993553	false	0	"CpCp13_RS10620"	149448	0.10334601837982269
2.5047348484848486	7.15748511240935E-5	0.3992438563327032	0.43915343915343913	30	4	false	"CpCp13_RS01250"	17	178.75	0	30	2	0.9967984364925854	false	0	"CpCp13_RS05555"	22354	0.1704003813155386
2.5104166666666665	3.0803585974290584E-4	0.39834024896265563	0.3888888888888889	44	4	false	"CpCp13_RS01055"	17	104.16666666666667	0	44	8	0.9967863475177304	false	0	"CpCp13_RS01545"	59242	0.10385510136257893
2.368844696969697	6.626222759386977E-5	0.42214671197281634	0.4711792702273929	62	4	false	"CpCp13_RS09005"	17	217.17741935483872	0	62	0	0.9970875644745326	false	0	"CpCp13_RS03140"	35284	0.17060284316955124
2.6695075757575757	1.6233744127673632E-4	0.3746009223128769	0.30124777183600715	43	4	false	"CpCp13_RS03110"	17	79.44117647058823	0	43	9	0.9964478562217924	false	0	"CpCp13_RS09555"	23970	0.11563490024830893
2.268939393939394	8.707635653563847E-4	0.4407345575959933	0.2885426809477442	102	4	false	"CpCp13_RS00720"	17	141.1139240506329	0	102	23	0.9973001289490652	false	0	"CpCp13_RS01920"	209688	0.09625779266755315
2.5426136363636362	8.354762625573282E-4	0.3932960893854749	0.2572390572390572	76	4	false	"CpCp13_RS07965"	17	58.018181818181816	0	76	21	0.996717843326886	false	0	"CpCp13_RS07770"	101924	0.0636164274322169
2.587121212121212	8.852733161922287E-4	0.38653001464128844	0.19004524886877827	68	3	false	"CpCp13_RS00055"	17	48.80769230769231	0	68	16	0.996623146357189	false	0	"CpCp13_RS01280"	96136	0.05952157598499062
2.2679924242424243	0.0018585323014058868	0.44091858037578285	0.1697054698457223	112	3	false	"CpCp13_RS01700"	17	92.35483870967742	0	112	19	0.9973021437782076	false	0	"CpCp13_RS07795"	289688	0.06359785538671169
2.246212121212121	0.002664194749329222	0.4451939291736931	0.15828315578199784	282	4	false	"CpCp13_RS03295"	17	99.7764705882353	0	282	27	0.9973484848484848	false	0	"CpCp13_RS02325"	539052	0.07446005267778753
2.5146780303030303	5.157358429584126E-4	0.3976652231218226	0.3444075304540421	58	4	false	"CpCp13_RS09695"	17	91.95348837209302	0	58	15	0.9967772807865893	false	0	"CpCp13_RS08755"	107194	0.09213776389989281
2.3106060606060606	2.111882464748328E-4	0.43278688524590164	0.3689727463312369	55	4	false	"CpCp13_RS08510"	17	176.2962962962963	0	55	1	0.9972114764667956	false	0	"CpCp13_RS06930"	97696	0.1250328342526924
2.327651515151515	6.949285860939612E-5	0.42961757526444266	0.41742286751361163	58	4	false	"CpCp13_RS08525"	17	208.31034482758622	0	58	0	0.9971752095422308	false	0	"CpCp13_RS08120"	46372	0.15205134658947897
2.3304924242424243	7.197970526652871E-5	0.4290938642828119	0.3983050847457627	60	4	false	"CpCp13_RS03105"	17	221.13333333333333	0	60	0	0.9971691650548034	false	0	"CpCp13_RS08270"	42176	0.1628375061364752
2.5572916666666665	3.151695104785825E-4	0.39103869653767825	0.37272727272727274	72	4	false	"CpCp13_RS07600"	17	102.23214285714286	0	72	16	0.9966866134751773	false	0	"CpCp13_RS02970"	64256	0.1156472204266322
2.237689393939394	4.26131273061966E-4	0.4468895471857808	0.351981351981352	78	4	false	"CpCp13_RS04835"	17	203.2948717948718	0	78	0	0.9973666183107673	false	0	"CpCp13_RS04415"	262424	0.13226732062125687
2.7518939393939394	3.390796126848827E-4	0.3633860977288369	0.22380952380952382	25	4	false	"CpCp13_RS10505"	17	41.857142857142854	0	25	4	0.9962725660863959	false	0	"CpCp13_RS01150"	31246	0.08064960088081476
2.3333333333333335	7.948252181401428E-5	0.42857142857142855	0.46982456140350876	78	4	false	"CpCp13_RS08300"	17	232.3684210526316	0	78	2	0.9971631205673759	false	0	"CpCp13_RS01045"	48878	0.17353877599150977
2.6543560606060606	4.276543070003063E-5	0.37673920799143773	0.4855072463768116	25	4	false	"CpCp13_RS01785"	17	130.625	0	25	1	0.9964800934880722	false	0	"CpCp13_RS03265"	11938	0.17723880597014927
2.59375	3.629276609281841E-4	0.3855421686746988	0.23333333333333334	29	4	false	"CpCp13_RS02945"	17	75.04	0	29	4	0.9966090425531915	false	0	"CpCp13_RS04945"	37048	0.08849056603773585
2.324337121212121	2.5994306403468755E-4	0.43023018944795277	0.3870056497175141	60	4	false	"CpCp13_RS10720"	17	199.4	0	60	0	0.9971822614442295	false	0	"CpCp13_RS04260"	107374	0.14522942461762564
2.3896780303030303	5.823625036641594E-5	0.4184664156924906	0.4074074074074074	28	4	false	"CpCp13_RS09395"	17	207.82142857142858	0	28	0	0.9970432382333979	false	0	"CpCp13_RS03135"	30666	0.1626145763469707
2.2514204545454546	8.489795174978229E-4	0.44416403785488956	0.30735930735930733	130	4	false	"CpCp13_RS06020"	17	132.04040404040404	0	130	31	0.9973374032882012	false	0	"CpCp13_RS05180"	246566	0.08903601081618613
2.4744318181818183	6.146212144870137E-5	0.4041331802525832	0.5102040816326531	49	4	false	"CpCp13_RS09160"	17	151.69387755102042	0	49	0	0.9968629110251451	false	0	"CpCp13_RS04350"	30494	0.14137360442779162
2.750473484848485	9.820225856255915E-5	0.3635737648476502	0.3746031746031746	39	4	false	"CpCp13_RS01650"	17	54.72222222222222	0	39	3	0.9962755883301095	false	0	"CpCp13_RS09245"	16258	0.10286131996658313
2.4105113636363638	1.1851909653277627E-4	0.4148497348261638	0.4439746300211416	44	4	false	"CpCp13_RS04185"	17	179.45454545454547	0	44	0	0.996998911992263	false	0	"CpCp13_RS05105"	52662	0.14782087763965854
2.450284090909091	3.457811935945503E-4	0.40811594202898555	0.4198445020362829	94	4	false	"CpCp13_RS10715"	17	114.85135135135135	0	94	20	0.9969142891682786	false	0	"CpCp13_RS01915"	115464	0.10479137897021108
2.300662878787879	1.1269659906287269E-4	0.4346573369005968	0.3781004234724743	58	4	false	"CpCp13_RS01170"	17	183.89655172413794	0	58	0	0.9972326321727918	false	0	"CpCp13_RS04680"	74286	0.12859898721967689
2.678503787878788	2.126656376954749E-4	0.37334276118083787	0.4492600422832981	52	4	false	"CpCp13_RS07145"	17	97.47727272727273	0	52	8	0.9964287153449387	false	0	"CpCp13_RS06445"	39894	0.14356004819922347
2.308712121212121	1.7513030526386812E-4	0.43314191960623466	0.3949152542372881	61	4	false	"CpCp13_RS03350"	17	182.38333333333333	0	61	1	0.9972155061250806	false	0	"CpCp13_RS05580"	88896	0.12916666666666668
2.546875	3.878423641891902E-4	0.39263803680981596	0.34262295081967215	87	4	false	"CpCp13_RS07365"	17	72.80327868852459	0	87	26	0.9967087765957446	false	0	"CpCp13_RS00895"	79168	0.08116307546100845
2.5961174242424243	1.0526581883663794E-4	0.3851905890935619	0.4915514592933948	74	4	false	"CpCp13_RS01150"	17	101.36507936507937	0	74	11	0.9966040054803352	false	0	"CpCp13_RS02635"	34192	0.12654816400134752
2.4086174242424243	3.465873395100792E-4	0.4151759386671909	0.33765032377428306	47	4	false	"CpCp13_RS03265"	17	140.53191489361703	0	47	0	0.997002941650548	false	0	"CpCp13_RS04460"	74852	0.11633436663378892
2.5014204545454546	9.807285838226653E-4	0.39977285633162973	0.25311871227364185	92	4	false	"CpCp13_RS01955"	17	67.29577464788733	0	92	21	0.9968054883945842	false	0	"CpCp13_RS01800"	142794	0.06839001488606436
2.3390151515151514	4.415199210889695E-4	0.42753036437246966	0.4268912055600107	105	4	false	"CpCp13_RS01360"	17	132.5287356321839	0	105	18	0.997151031592521	false	0	"CpCp13_RS10305"	148370	0.10101275581721335
2.390151515151515	1.2378293475638467E-4	0.4183835182250396	0.47372549019607846	51	4	false	"CpCp13_RS01145"	17	239.68627450980392	0	51	0	0.9970422308188266	false	0	"CpCp13_RS07135"	43838	0.19251909599181039
2.444602272727273	6.788681616412095E-5	0.4090644973852411	0.3783068783068783	28	4	false	"CpCp13_RS02355"	17	187.32142857142858	0	28	0	0.9969263781431335	false	0	"CpCp13_RS03330"	20420	0.1619027040375355
2.6070075757575757	2.7604074223064074E-4	0.3835815474028333	0.245014245014245	31	4	false	"CpCp13_RS05950"	17	72.81481481481481	0	31	4	0.9965808349451967	false	0	"CpCp13_RS05150"	35910	0.08989483310470965
2.4043560606060606	4.039853215986286E-4	0.4159117762898779	0.3798165137614679	140	4	false	"CpCp13_RS05940"	17	120.73636363636363	0	140	30	0.9970120083816892	false	0	"CpCp13_RS01370"	140216	0.10498814229249012
2.3480113636363638	9.419423013355291E-5	0.425892316999395	0.392090395480226	60	4	false	"CpCp13_RS04205"	17	222.31666666666666	0	60	0	0.9971318907156673	false	0	"CpCp13_RS00750"	52110	0.16791289023162134
2.3773674242424243	8.143256416260489E-5	0.4206333399721171	0.4426559356136821	72	4	false	"CpCp13_RS09225"	17	202.05633802816902	0	72	1	0.9970694310122501	false	0	"CpCp13_RS03880"	37338	0.16087288059567598
2.475852272727273	9.99953399224902E-4	0.40390131956397013	0.2554112554112554	128	4	false	"CpCp13_RS09480"	17	82.44444444444444	0	128	29	0.9968598887814314	false	0	"CpCp13_RS05805"	198260	0.08162816281628163
2.181344696969697	0.0035642940724958452	0.4584328196223139	0.16956488136641162	263	4	false	"CpCp13_RS05800"	17	107.75	0	263	35	0.9974865006447453	false	0	"CpCp13_RS08425"	934880	0.07159468438538207
2.418560606060606	5.481721534095406E-5	0.413469068128426	0.4050420168067227	35	4	false	"CpCp13_RS05110"	17	171.5142857142857	0	35	0	0.9969817859445519	false	0	"CpCp13_RS04440"	30248	0.14174734356552537
2.652462121212121	9.722571863701352E-5	0.3770082113530882	0.42298850574712643	30	4	false	"CpCp13_RS07905"	17	99.9	0	30	0	0.9964841231463571	false	0	"CpCp13_RS04125"	19662	0.13855755894590846
2.6297348484848486	3.085028662952245E-5	0.3802664746128916	0.631578947368421	20	4	false	"CpCp13_RS01770"	17	148.3	0	20	0	0.9965324790457769	false	0	"CpCp13_RS01955"	9670	0.18445273631840797
2.2821969696969697	3.6317108241480303E-4	0.43817427385892116	0.294944227147617	139	4	false	"CpCp13_RS03280"	17	154.59322033898306	0	139	21	0.9972719213410702	false	0	"CpCp13_RS02710"	124984	0.11003076180710537
2.4483901515151514	2.859645057410502E-4	0.4084316379810482	0.3929110105580694	70	4	false	"CpCp13_RS08945"	17	105.6923076923077	0	70	18	0.9969183188265636	false	0	"CpCp13_RS09690"	65678	0.09428394977012283
2.428030303030303	1.2485129346204607E-4	0.4118564742589703	0.3853459972862958	75	4	false	"CpCp13_RS05995"	17	152.37313432835822	0	75	8	0.996961637653127	false	0	"CpCp13_RS03345"	43634	0.13158301755471347
2.647253787878788	1.406400642442158E-4	0.3777499552852799	0.41625615763546797	36	4	false	"CpCp13_RS08735"	17	71.6896551724138	0	36	7	0.9964952047066409	false	0	"CpCp13_RS02925"	23006	0.0974044227886057
2.5606060606060606	5.60543536897285E-4	0.3905325443786982	0.3289617486338798	82	4	false	"CpCp13_RS02860"	17	98.8360655737705	0	82	21	0.9966795615731786	false	0	"CpCp13_RS02545"	93626	0.1133441118965258
2.2911931818181817	5.670651834215425E-5	0.43645381277123374	0.4281183932346723	44	4	false	"CpCp13_RS07820"	17	228.29545454545453	0	44	0	0.9972527804642166	false	0	"CpCp13_RS02100"	42356	0.15658124454420752
2.622159090909091	5.961085900145429E-5	0.38136511375947996	0.4842105263157895	26	4	false	"CpCp13_RS10585"	17	100.15	0	26	6	0.9965485976789169	false	0	"CpCp13_RS01360"	12936	0.12333743842364532
2.5601325757575757	7.059592671256321E-4	0.3906047715923803	0.18272425249169436	51	4	false	"CpCp13_RS05035"	17	60.74418604651163	0	51	8	0.9966805689877498	false	0	"CpCp13_RS08495"	73960	0.06814919218019994
2.335227272727273	3.0228369749831977E-4	0.4282238442822384	0.3445117217823319	127	4	false	"CpCp13_RS01275"	17	157.859649122807	0	127	13	0.9971590909090909	false	0	"CpCp13_RS06310"	96676	0.1217113717215166
2.538352272727273	1.771164884835035E-4	0.39395635142697255	0.492566510172144	99	4	false	"CpCp13_RS05440"	17	114.44444444444444	0	99	27	0.9967269100580272	false	0	"CpCp13_RS03775"	54084	0.12631837135148394
2.3020833333333335	9.574191953980875E-4	0.43438914027149317	0.22732362821948487	120	4	false	"CpCp13_RS07360"	17	106.52631578947368	0	120	25	0.997229609929078	false	0	"CpCp13_RS01710"	217706	0.07708127046995202
2.1676136363636362	0.004144830000151836	0.4613368283093054	0.13280471922163486	263	4	false	"CpCp13_RS01590"	17	91.48034934497817	0	263	34	0.9975157156673115	false	0	"CpCp13_RS02685"	946044	0.0597910780032537
2.4829545454545454	1.4570722427210502E-5	0.40274599542334094	0.5227272727272727	33	4	false	"CpCp13_RS10415"	17	220.3939393939394	0	33	0	0.9968447775628626	false	0	"CpCp13_RS08990"	8056	0.19678030303030303
2.3328598484848486	1.4478877940940084E-4	0.42865841282727823	0.34870719776380155	57	4	false	"CpCp13_RS00705"	17	157.5185185185185	0	57	3	0.9971641279819471	false	0	"CpCp13_RS07915"	55602	0.11556751175239803
2.3011363636363638	9.053405423335656E-5	0.4345679012345679	0.421291788380396	79	4	false	"CpCp13_RS00040"	17	225.37974683544303	0	79	0	0.9972316247582205	false	0	"CpCp13_RS08970"	58832	0.16087062586398504
2.347537878787879	2.483076449913073E-4	0.4259782170229931	0.3153846153846154	44	4	false	"CpCp13_RS05200"	17	145.7	0	44	4	0.9971328981302385	false	0	"CpCp13_RS02200"	72118	0.1085692995529061
2.212121212121212	0.0012334511554914105	0.452054794520548	0.22169059011164274	154	4	false	"CpCp13_RS07045"	17	118.29323308270676	0	154	21	0.9974210186976145	false	0	"CpCp13_RS09730"	321790	0.07721490410098353
2.4275568181818183	4.560078362499231E-4	0.41193680514921005	0.3591346153846154	65	3	false	"CpCp13_RS04985"	17	109.49230769230769	0	65	0	0.9969626450676983	false	0	"CpCp13_RS02510"	110088	0.09571005917159764
2.497159090909091	5.5559188155418717E-5	0.4004550625711035	0.32748538011695905	19	4	false	"CpCp13_RS02435"	17	128.05263157894737	0	19	0	0.9968145551257254	false	0	"CpCp13_RS01145"	14976	0.12046343516363817
2.493371212121212	6.228869852888603E-5	0.40106342575009496	0.4603174603174603	28	4	false	"CpCp13_RS07005"	17	193.28571428571428	0	28	0	0.9968226144422954	false	0	"CpCp13_RS05330"	24102	0.18183039913990054
2.5516098484848486	9.50182375092969E-5	0.391909445166079	0.36666666666666664	25	4	false	"CpCp13_RS05915"	17	127.88	0	25	0	0.9966987024500322	false	0	"CpCp13_RS02355"	25542	0.13662393162393163
2.4038825757575757	6.181791045138146E-5	0.415993697065196	0.4157801418439716	48	4	false	"CpCp13_RS03575"	17	223.75	0	48	0	0.9970130157962604	false	0	"CpCp13_RS08630"	32828	0.1826530612244898
2.399621212121212	1.061380309280773E-4	0.4167324388318864	0.42738205365402404	47	4	false	"CpCp13_RS00200"	17	177.19148936170214	0	47	0	0.9970220825274018	false	0	"CpCp13_RS03260"	48770	0.14370761505409743
2.275094696969697	1.762611935383393E-4	0.43954214360041627	0.4056497175141243	62	4	false	"CpCp13_RS04080"	17	199.76666666666668	0	62	2	0.9972870325596389	false	0	"CpCp13_RS05405"	93192	0.13534327009936767
2.234848484848485	2.695858535469592E-4	0.44745762711864406	0.38151159289370673	82	4	false	"CpCp13_RS01385"	17	193.82926829268294	0	82	0	0.9973726627981947	false	0	"CpCp13_RS05570"	162480	0.12594494365996292
2.3546401515151514	5.484093838155684E-5	0.42469334405791276	0.41490196078431374	51	4	false	"CpCp13_RS05360"	17	213.88235294117646	0	51	0	0.99711778691167	false	0	"CpCp13_RS02700"	30808	0.1614206437291898
2.363162878787879	1.918456630825589E-4	0.42316169104387896	0.2823529411764706	35	4	false	"CpCp13_RS04465"	17	137.85714285714286	0	35	0	0.9970996534493874	false	0	"CpCp13_RS03870"	55432	0.10491411176342683
2.175662878787879	0.0021879481276634387	0.45963003264417845	0.18882569421211107	281	4	false	"CpCp13_RS00910"	17	116.39183673469388	0	281	36	0.9974985896196003	false	0	"CpCp13_RS03510"	592758	0.07759455782312925
2.319602272727273	0.001422091322334408	0.4311083894672382	0.19235412474849095	96	3	false	"CpCp13_RS04970"	17	83.19718309859155	0	96	25	0.997192335589942	false	0	"CpCp13_RS05985"	228296	0.06090569772956922
2.3134469696969697	1.646055042732116E-4	0.4322554236594351	0.3783783783783784	38	4	false	"CpCp13_RS02085"	17	187.5	0	38	0	0.9972054319793681	false	0	"CpCp13_RS08420"	66630	0.13250883392226148
2.5804924242424243	3.390611679775886E-4	0.3875229357798165	0.2591093117408907	48	4	false	"CpCp13_RS07450"	17	69.41025641025641	0	48	9	0.9966372501611863	false	0	"CpCp13_RS05125"	63070	0.08064997018485391
2.383049242424242	1.5733872819186125E-4	0.4196304391019273	0.4258357676079195	88	4	false	"CpCp13_RS02910"	17	178.08860759493672	0	88	9	0.9970573420373953	false	0	"CpCp13_RS09850"	64096	0.14443520486207356
2.547348484848485	7.718192486815509E-4	0.3925650557620818	0.23473541383989144	76	4	false	"CpCp13_RS08845"	17	66.68656716417911	0	76	9	0.9967077691811734	false	0	"CpCp13_RS09445"	130656	0.07409618573797679
2.5625	0.0014598302505477833	0.3902439024390244	0.1413458712900382	94	4	false	"CpCp13_RS00380"	17	50.12048192771084	0	94	11	0.9966755319148937	false	0	"CpCp13_RS05320"	221782	0.05922982710985787
2.5880681818181817	1.6383704307595712E-4	0.38638858397365533	0.37333333333333335	25	4	false	"CpCp13_RS00820"	17	94.12	0	25	0	0.9966211315280464	false	0	"CpCp13_RS05950"	34290	0.11055229142185664
2.3579545454545454	5.2786219355050934E-5	0.42409638554216866	0.44841269841269843	67	4	false	"CpCp13_RS00900"	17	205.375	0	67	3	0.9971107350096712	false	0	"CpCp13_RS05900"	27952	0.1570145259938838
2.812973484848485	2.4214006313092907E-5	0.3554957077933008	0.4888888888888889	10	4	false	"CpCp13_RS05605"	17	68.5	0	10	0	0.9961426096067053	false	0	"CpCp13_RS03535"	3708	0.1607981220657277
2.4375	9.043813664955235E-4	0.41025641025641024	0.2048131080389145	76	4	false	"CpCp13_RS01565"	17	75.26984126984127	0	76	13	0.9969414893617021	false	0	"CpCp13_RS03975"	131428	0.06678779172124336
2.335700757575758	3.7899199994584727E-5	0.4281370362862355	0.45310734463276836	60	4	false	"CpCp13_RS00510"	17	242.4	0	60	0	0.9971580834945197	false	0	"CpCp13_RS04905"	30182	0.1790251107828656
2.425189393939394	2.4647890921236768E-5	0.41233893010542755	0.49169435215946844	46	4	false	"CpCp13_RS09325"	17	216.97674418604652	0	46	3	0.9969676821405545	false	0	"CpCp13_RS06980"	15080	0.17991438158046974
2.761837121212121	1.2660828527335052E-4	0.3620778330190297	0.3523809523809524	28	4	false	"CpCp13_RS06155"	17	56.857142857142854	0	28	7	0.9962514103803998	false	0	"CpCp13_RS01130"	13488	0.11170362054448499
2.4786931818181817	0.001419392104027338	0.40343839541547283	0.21978021978021978	108	4	false	"CpCp13_RS04610"	18	66.98717948717949	0	108	30	0.9968538442940038	false	0	"CpCp13_RS06815"	200490	0.06541716746794872
2.368844696969697	5.648276697365251E-5	0.42214671197281634	0.45790934320074006	47	4	false	"CpCp13_RS02240"	18	242.74468085106383	0	47	0	0.9970875644745326	false	0	"CpCp13_RS01390"	36394	0.18672667757774142
2.3413825757575757	6.3415330411136E-5	0.427098078867543	0.4653846153846154	40	4	false	"CpCp13_RS05730"	18	226.525	0	40	0	0.9971459945196648	false	0	"CpCp13_RS04760"	40334	0.1666850625459897
2.268465909090909	1.5581285459004586E-4	0.44082654978083907	0.35673076923076924	65	4	false	"CpCp13_RS08615"	18	204.33846153846153	0	65	0	0.9973011363636363	false	0	"CpCp13_RS01365"	90814	0.1375912975912976
2.3413825757575757	3.995437263884812E-4	0.427098078867543	0.27850751951265945	117	4	false	"CpCp13_RS10705"	18	115.44660194174757	0	117	14	0.9971459945196648	false	0	"CpCp13_RS04410"	104252	0.08942416881622585
2.2547348484848486	0.002289845637665109	0.4435111297774044	0.16933542647828362	216	4	false	"CpCp13_RS00835"	18	100.06122448979592	0	216	20	0.9973303513862024	false	0	"CpCp13_RS00330"	429364	0.0723508492334027
2.178030303030303	3.7389309051965875E-4	0.4591304347826087	0.30103230103230105	81	3	false	"CpCp13_RS03695"	18	197.7051282051282	0	81	3	0.997493552546744	false	0	"CpCp13_RS04795"	209900	0.11924314125761652
2.643465909090909	1.335321624343192E-4	0.3782912412681354	0.45652173913043476	26	4	false	"CpCp13_RS01100"	18	85.08333333333333	0	26	2	0.9965032640232108	false	0	"CpCp13_RS05940"	27520	0.11451323463436519
2.2490530303030303	5.277615721781908E-4	0.44463157894736843	0.3360655737704918	61	3	false	"CpCp13_RS03170"	18	147.327868852459	0	61	0	0.9973424403610575	false	0	"CpCp13_RS10690"	180136	0.09660843859177641
2.328125	9.702465910811143E-5	0.42953020134228187	0.4383561643835616	74	4	false	"CpCp13_RS09310"	18	227.3783783783784	0	74	0	0.9971742021276596	false	0	"CpCp13_RS04910"	54304	0.167313008372611
2.449337121212121	1.0503900843709839E-4	0.40827372897738257	0.406827880512091	38	4	false	"CpCp13_RS07690"	18	134.94736842105263	0	38	0	0.996916303997421	false	0	"CpCp13_RS07520"	40566	0.11921145620234332
2.2954545454545454	2.5991755882963694E-4	0.43564356435643564	0.37764866712235134	88	4	false	"CpCp13_RS02955"	18	168.94805194805195	0	88	11	0.9972437137330754	false	0	"CpCp13_RS02585"	123212	0.11939791657106144
2.440814393939394	7.428298919366911E-4	0.40969932104752665	0.24552429667519182	81	4	false	"CpCp13_RS08065"	18	98.01449275362319	0	81	12	0.9969344374597034	false	0	"CpCp13_RS07500"	139548	0.08774797918856149
2.272253787878788	2.167012804082781E-4	0.4400916857678683	0.3616346955796497	119	4	false	"CpCp13_RS05865"	18	179.85454545454544	0	119	9	0.9972930770470664	false	0	"CpCp13_RS06975"	100672	0.12568451813734832
2.4512310606060606	1.295339828563804E-4	0.4079582769943983	0.44154589371980674	50	4	false	"CpCp13_RS05400"	18	166.95652173913044	0	50	4	0.996912274339136	false	0	"CpCp13_RS04235"	46812	0.1478800015404167
2.3764204545454546	1.920870508364242E-5	0.42080095636580994	0.4166666666666667	25	4	false	"CpCp13_RS03310"	18	241.44	0	25	0	0.9970714458413927	false	0	"CpCp13_RS04205"	15604	0.18472838561591431
2.5961174242424243	2.870462533438085E-5	0.3851905890935619	0.4492753623188406	24	4	false	"CpCp13_RS03780"	18	117.29166666666667	0	24	0	0.9966040054803352	false	0	"CpCp13_RS09225"	11400	0.13638565891472867
2.199337121212121	0.0013492381098209193	0.45468245425188375	0.23138643067846607	261	4	false	"CpCp13_RS07180"	18	131.18141592920355	0	261	35	0.9974482188910381	false	0	"CpCp13_RS09865"	384854	0.08942155141731666
2.625	1.2036541930410858E-4	0.38095238095238093	0.4336134453781513	35	4	false	"CpCp13_RS02040"	18	107.14285714285714	0	35	0	0.9965425531914893	false	0	"CpCp13_RS01690"	26034	0.13753896937465615
2.4266098484848486	6.551548837520563E-5	0.41209756097560973	0.44634146341463415	41	4	false	"CpCp13_RS00345"	18	208.9268292682927	0	41	0	0.9969646598968407	false	0	"CpCp13_RS05055"	25088	0.1743963516429822
2.3546401515151514	8.958388489487078E-5	0.42469334405791276	0.47796610169491527	60	4	false	"CpCp13_RS02670"	18	235.96666666666667	0	60	0	0.99711778691167	false	0	"CpCp13_RS06665"	41274	0.17998982964658022
2.3020833333333335	9.644915993574158E-4	0.43438914027149317	0.20778072502210435	133	4	false	"CpCp13_RS08810"	18	113.95726495726495	0	133	16	0.997229609929078	false	0	"CpCp13_RS00760"	216546	0.0836690638452753
2.396780303030303	5.698907637755117E-4	0.41722639273014617	0.3774458236903009	126	4	false	"CpCp13_RS04255"	18	116.72448979591837	0	126	28	0.9970281270148291	false	0	"CpCp13_RS08060"	174612	0.09900295996261099
2.225852272727273	0.0012982305270535686	0.44926611359285257	0.23350659736105558	147	3	false	"CpCp13_RS01280"	18	123.0650406504065	0	147	24	0.9973918036750484	false	0	"CpCp13_RS00285"	331492	0.08139222265238526
2.4275568181818183	1.4190227395334933E-4	0.41193680514921005	0.42183163737280294	48	4	false	"CpCp13_RS09690"	18	193.27659574468086	0	48	1	0.9969626450676983	false	0	"CpCp13_RS00530"	64626	0.1654765374526377
2.1860795454545454	0.0020601591730821443	0.4574398960363873	0.2397038890626629	173	4	false	"CpCp13_RS05900"	18	134.13669064748203	0	173	34	0.9974764264990329	false	0	"CpCp13_RS04650"	525126	0.08473574898767025
2.2855113636363638	9.550401467784933E-5	0.437538844002486	0.42947368421052634	76	4	false	"CpCp13_RS09235"	18	236.94736842105263	0	76	0	0.9972648694390716	false	0	"CpCp13_RS06590"	67244	0.1651201173665872
2.415246212121212	5.132993982598683E-5	0.4140364634385415	0.4383838383838384	45	4	false	"CpCp13_RS03625"	18	201.64444444444445	0	45	0	0.9969888378465507	false	0	"CpCp13_RS00850"	31682	0.1670625057534751
2.287405303030303	7.902729704933486E-5	0.437176567998344	0.41694915254237286	60	4	false	"CpCp13_RS05565"	18	250.91666666666666	0	60	0	0.9972608397807866	false	0	"CpCp13_RS01585"	61814	0.173165401426271
2.296401515151515	3.1052559185738425E-4	0.4354639175257732	0.363499245852187	60	4	false	"CpCp13_RS10660"	18	151.44230769230768	0	60	8	0.997241698903933	false	0	"CpCp13_RS02335"	96650	0.10553470919324578
2.599905303030303	8.313720599844452E-4	0.38462939355308684	0.21971153846153846	82	4	false	"CpCp13_RS03520"	18	68.38461538461539	0	82	17	0.9965959461637653	false	0	"CpCp13_RS01335"	136242	0.08421750663129973
2.399621212121212	8.066210701881468E-5	0.4167324388318864	0.43600233781414377	61	4	false	"CpCp13_RS08545"	18	194.08474576271186	0	61	2	0.9970220825274018	false	0	"CpCp13_RS07185"	43622	0.15960916592328278
2.4393939393939394	4.929413593371114E-4	0.40993788819875776	0.274822695035461	54	4	false	"CpCp13_RS06660"	18	94.5625	0	54	6	0.9969374597034172	false	0	"CpCp13_RS09295"	93356	0.08309534270650264
2.321022727272727	1.1270045949881735E-4	0.43084455324357407	0.4059278350515464	107	4	false	"CpCp13_RS02025"	18	175.81443298969072	0	107	10	0.9971893133462282	false	0	"CpCp13_RS05535"	54218	0.13023291332569684
2.396780303030303	1.4272057958281662E-4	0.41722639273014617	0.45876887340301975	42	4	false	"CpCp13_RS00230"	18	183.07142857142858	0	42	0	0.9970281270148291	false	0	"CpCp13_RS00485"	40708	0.14751928168527684
2.6766098484848486	2.106406570902515E-4	0.37360693437113035	0.21052631578947367	20	4	false	"CpCp13_RS09095"	18	61.15	0	20	0	0.9964327450032237	false	0	"CpCp13_RS09480"	22108	0.09019174041297935
2.336647727272727	3.9703465818393775E-5	0.4279635258358663	0.5252525252525253	55	4	false	"CpCp13_RS04170"	18	214.07272727272726	0	55	0	0.9971560686653771	false	0	"CpCp13_RS02590"	32008	0.15717527699906556
2.5994318181818183	3.9370511022857453E-4	0.38469945355191254	0.25071225071225073	36	4	false	"CpCp13_RS01660"	18	61.44444444444444	0	36	9	0.9965969535783366	false	0	"CpCp13_RS00250"	40254	0.07411875083768932
2.3764204545454546	1.4427589781537692E-4	0.42080095636580994	0.38461538461538464	53	4	false	"CpCp13_RS05925"	18	191.39622641509433	0	53	0	0.9970714458413927	false	0	"CpCp13_RS08640"	62862	0.15118185340844734
2.265151515151515	5.18423416908927E-4	0.4414715719063545	0.2872239533938491	134	4	false	"CpCp13_RS09625"	18	138.12295081967213	0	134	12	0.997308188265635	false	0	"CpCp13_RS04745"	200690	0.09611896368801122
2.412878787878788	5.135476488201548E-4	0.41444270015698587	0.23420724094881398	105	4	false	"CpCp13_RS10745"	18	90.56666666666666	0	105	15	0.9969938749194068	false	0	"CpCp13_RS08920"	109032	0.07800746482917026
2.3707386363636362	3.4489762429622496E-5	0.42180946674655484	0.444947209653092	52	4	false	"CpCp13_RS02140"	18	218.65384615384616	0	52	0	0.9970835348162476	false	0	"CpCp13_RS07920"	22830	0.16976230291447683
2.2386363636363638	3.052930585169013E-4	0.44670050761421315	0.3503075871496924	77	4	false	"CpCp13_RS08815"	18	213.16883116883116	0	77	0	0.9973646034816247	false	0	"CpCp13_RS00740"	198254	0.1391441456715608
2.4857954545454546	6.746510387084913E-5	0.4022857142857143	0.4942528735632184	31	4	false	"CpCp13_RS10205"	18	185.33333333333334	0	31	1	0.9968387330754352	false	0	"CpCp13_RS10040"	23194	0.1720829464562055
2.491477272727273	3.9167008795006346E-4	0.4013683010262257	0.33425925925925926	110	4	false	"CpCp13_RS05255"	18	102.64197530864197	0	110	29	0.9968266441005803	false	0	"CpCp13_RS10180"	98776	0.10274472002867065
2.3238636363636362	5.686119564926469E-5	0.430317848410758	0.42349726775956287	61	4	false	"CpCp13_RS09820"	18	239.18032786885246	0	61	0	0.9971832688588008	false	0	"CpCp13_RS02765"	41598	0.17420271512662233
2.449337121212121	1.5035699981093452E-4	0.40827372897738257	0.46236559139784944	31	4	false	"CpCp13_RS08070"	18	197.67741935483872	0	31	0	0.996916303997421	false	0	"CpCp13_RS03010"	40396	0.17294612367002513
2.165719696969697	0.005096123623380798	0.4617402710975077	0.15110087045570916	309	3	false	"CpCp13_RS07975"	18	97.98214285714286	0	309	29	0.9975197453255964	false	0	"CpCp13_RS01290"	872170	0.06611480624638519
2.4270833333333335	1.3719743497693854E-4	0.41201716738197425	0.43278688524590164	66	4	false	"CpCp13_RS06030"	18	168.19672131147541	0	66	5	0.9969636524822696	false	0	"CpCp13_RS08245"	45360	0.14412743899869357
2.606060606060606	3.160146398257408E-4	0.38372093023255816	0.33395989974937346	68	4	false	"CpCp13_RS03935"	18	70.84210526315789	0	68	11	0.9965828497743391	false	0	"CpCp13_RS09235"	60210	0.09001538152879021
2.4952651515151514	1.1809152043623971E-4	0.40075901328273245	0.47283702213279677	83	4	false	"CpCp13_RS02495"	18	140.64788732394365	0	83	12	0.9968185847840104	false	0	"CpCp13_RS09255"	43730	0.1395316342499441
2.7769886363636362	3.0962663687788544E-5	0.36010230179028135	0.572463768115942	34	4	false	"CpCp13_RS09945"	18	67.875	0	34	10	0.9962191731141199	false	0	"CpCp13_RS00110"	5286	0.140527950310559
2.371685606060606	0.001554379708263152	0.42164104611698944	0.2043956043956044	140	4	false	"CpCp13_RS08155"	18	81.28571428571429	0	140	35	0.997081519987105	false	0	"CpCp13_RS01435"	255122	0.0664641981076977
2.336174242424242	1.0435265543343503E-4	0.4280502634779084	0.4064969271290606	68	4	false	"CpCp13_RS06800"	18	231.58823529411765	0	68	0	0.9971570760799484	false	0	"CpCp13_RS03625"	64006	0.17269816203886476
2.509469696969697	2.78661224833675E-4	0.39849056603773586	0.3412698412698413	46	4	false	"CpCp13_RS08275"	18	90.94444444444444	0	46	10	0.996788362346873	false	0	"CpCp13_RS01505"	44770	0.09067242716295558
2.6988636363636362	1.9122438764505783E-4	0.3705263157894737	0.3007246376811594	32	4	false	"CpCp13_RS01405"	18	53.916666666666664	0	32	8	0.9963853965183752	false	0	"CpCp13_RS03300"	21994	0.08738519719070773
2.3546401515151514	1.1499970834102356E-4	0.42469334405791276	0.43356643356643354	68	4	false	"CpCp13_RS06820"	18	206.6818181818182	0	68	2	0.99711778691167	false	0	"CpCp13_RS05565"	57332	0.15898601398601397
2.3773674242424243	5.5514524220732555E-5	0.4206333399721171	0.44426229508196724	61	4	false	"CpCp13_RS01255"	18	212.327868852459	0	61	0	0.9970694310122501	false	0	"CpCp13_RS05005"	31352	0.16824712270400874
2.288352272727273	1.9791593615185344E-4	0.43699565487274983	0.4170471841704718	73	4	false	"CpCp13_RS02015"	18	213.6986301369863	0	73	0	0.9972588249516442	false	0	"CpCp13_RS09110"	99248	0.14881520204525508
2.603219696969697	5.61388833394697E-5	0.3841396871589669	0.38405797101449274	24	4	false	"CpCp13_RS01445"	18	111.375	0	24	0	0.9965888942617667	false	0	"CpCp13_RS05800"	15960	0.13306451612903225
2.2831439393939394	6.944720399758254E-4	0.43799253421816675	0.3080357142857143	67	3	false	"CpCp13_RS07515"	18	126.046875	0	67	3	0.9972699065119278	false	0	"CpCp13_RS10660"	176214	0.08692887931034483
2.396780303030303	9.059064790597928E-4	0.41722639273014617	0.2772133526850508	69	4	false	"CpCp13_RS05130"	18	95.09433962264151	0	69	16	0.9970281270148291	false	0	"CpCp13_RS03520"	133950	0.07775497924991129
2.2646780303030303	0.0016829221314643746	0.44156387204683256	0.20344287949921752	83	3	false	"CpCp13_RS08160"	18	88.91666666666667	0	83	11	0.9973091956802064	false	0	"CpCp13_RS08885"	254022	0.06003826243529147
3.0482954545454546	3.100885585770827E-6	0.3280521901211556	0.5	5	4	false	"CpCp13_RS01820"	18	55.4	0	5	0	0.9956419245647969	false	0	"CpCp13_RS01695"	468	0.2729064039408867
2.352272727272727	2.6466444204706834E-4	0.42512077294685996	0.44392156862745097	62	4	false	"CpCp13_RS05675"	18	167.52941176470588	0	62	11	0.9971228239845261	false	0	"CpCp13_RS06555"	56024	0.12662842914943756
2.1268939393939394	0.005454611654358464	0.47016918967052534	0.13792797061959483	416	4	false	"CpCp13_RS08240"	18	95.4320652173913	0	416	48	0.9976023533204385	false	0	"CpCp13_RS00675"	1113508	0.06456837971406719
2.4886363636363638	3.739697804306078E-5	0.4018264840182648	0.4166666666666667	24	4	false	"CpCp13_RS06545"	18	215.70833333333334	0	24	0	0.9968326885880077	false	0	"CpCp13_RS05110"	16700	0.19972993827160493
2.2481060606060606	5.940176569891457E-4	0.4448188711036226	0.29858064516129035	135	4	false	"CpCp13_RS01420"	18	144.528	0	135	10	0.9973444551901999	false	0	"CpCp13_RS04420"	263032	0.09818478260869565
2.462121212121212	0.0015361649554946717	0.4061538461538462	0.20955201777119586	95	4	false	"CpCp13_RS05290"	18	68.82432432432432	0	95	21	0.9968891038039974	false	0	"CpCp13_RS02175"	195682	0.06473265363199512
2.4393939393939394	1.7501298600281585E-4	0.40993788819875776	0.4059196617336152	44	4	false	"CpCp13_RS09080"	18	152.72727272727272	0	44	0	0.9969374597034172	false	0	"CpCp13_RS02735"	42748	0.13255602904040403
2.241950757575758	0.0015558039045595877	0.44604012671594506	0.22468381291910702	185	4	false	"CpCp13_RS05040"	18	124.0909090909091	0	185	31	0.997357551579626	false	0	"CpCp13_RS04390"	402962	0.08569814163736815
2.4005681818181817	6.018916756886263E-5	0.41656804733727815	0.467687074829932	49	4	false	"CpCp13_RS03255"	18	213.57142857142858	0	49	0	0.9970200676982591	false	0	"CpCp13_RS10780"	38144	0.17448646125116712
2.6046401515151514	3.304557845228323E-4	0.3839301945100891	0.30977982590885816	76	4	false	"CpCp13_RS10465"	18	75.71428571428571	0	76	13	0.9965858720180529	false	0	"CpCp13_RS03730"	58876	0.09669768290457946
2.3072916666666665	5.890187630893743E-4	0.4334085778781039	0.28864864864864864	98	3	false	"CpCp13_RS05230"	18	120.30666666666667	0	98	23	0.9972185283687943	false	0	"CpCp13_RS01160"	158752	0.08667627281460134
2.5269886363636362	2.7394216346073697E-4	0.39572793704328274	0.37438423645320196	34	4	false	"CpCp13_RS01135"	18	94.65517241379311	0	34	5	0.9967510880077369	false	0	"CpCp13_RS00610"	53666	0.09698275862068965
2.4663825757575757	2.7877091205112594E-4	0.40545210213092725	0.3010351966873706	80	4	false	"CpCp13_RS05215"	18	104.51428571428572	0	80	10	0.9968800370728562	false	0	"CpCp13_RS02155"	73050	0.0980434199946395
2.497159090909091	7.267876430408555E-5	0.4004550625711035	0.5221774193548387	32	4	false	"CpCp13_RS04285"	18	199.125	0	32	0	0.9968145551257254	false	0	"CpCp13_RS01890"	28608	0.19109884836852206
2.330965909090909	8.959226192406605E-5	0.42900670322973794	0.3987012987012987	56	4	false	"CpCp13_RS07130"	18	188.98214285714286	0	56	0	0.997168157640232	false	0	"CpCp13_RS10045"	54126	0.13824589821297942
2.446496212121212	0.0010967681712310744	0.4087478227211148	0.2506122448979592	64	4	false	"CpCp13_RS10645"	18	76.58	0	64	14	0.9969223484848485	false	0	"CpCp13_RS03210"	135466	0.06831400535236395
2.2670454545454546	0.002896516908843251	0.44110275689223055	0.17395577395577397	153	4	false	"CpCp13_RS07605"	18	81.33333333333333	0	153	42	0.9973041586073501	false	0	"CpCp13_RS09050"	457116	0.05656003708854891
2.462594696969697	6.111034637983388E-4	0.4060757546625649	0.27465986394557823	63	4	false	"CpCp13_RS05700"	18	84.08163265306122	0	63	14	0.9968880963894262	false	0	"CpCp13_RS04675"	98044	0.07720994733981747
2.4550189393939394	0.0011588949167867838	0.4073288331726133	0.2371584699453552	84	3	false	"CpCp13_RS00635"	18	80.57377049180327	0	84	23	0.9969042150225661	false	0	"CpCp13_RS00830"	174540	0.07392089035945255
2.393939393939394	2.2775668995203565E-5	0.4177215189873418	0.5200845665961945	44	4	false	"CpCp13_RS07120"	18	257.22727272727275	0	44	0	0.9970341715022566	false	0	"CpCp13_RS06185"	19028	0.20414862914862913
2.247159090909091	0.001189162383351968	0.4450063211125158	0.23517412935323384	229	3	false	"CpCp13_RS07285"	18	127.04975124378109	0	229	28	0.9973464700193424	false	0	"CpCp13_RS04335"	318028	0.09146850341524917
2.368371212121212	2.0995996124019208E-4	0.42223110755697724	0.305458768873403	42	4	false	"CpCp13_RS01025"	18	173.83333333333334	0	42	0	0.9970885718891038	false	0	"CpCp13_RS03485"	74982	0.1335125448028674
2.678030303030303	1.1794030576051832E-4	0.37340876944837337	0.3333333333333333	22	4	false	"CpCp13_RS05785"	18	84.13636363636364	0	22	0	0.99642972275951	false	0	"CpCp13_RS07905"	21446	0.12318647677359244
2.4356060606060606	4.173088736780843E-5	0.4105754276827372	0.49365750528541225	47	4	false	"CpCp13_RS04075"	18	206.61363636363637	0	47	3	0.9969455190199871	false	0	"CpCp13_RS03545"	17652	0.176442046424967
2.6107954545454546	1.2557263513552478E-4	0.383025027203482	0.39384615384615385	28	4	false	"CpCp13_RS07740"	18	102.6923076923077	0	28	2	0.9965727756286267	false	0	"CpCp13_RS01825"	24972	0.12709444021325209
2.508996212121212	5.004953627625732E-4	0.3985657671258728	0.29551020408163264	70	4	false	"CpCp13_RS08445"	18	86.58	0	70	20	0.9967893697614443	false	0	"CpCp13_RS08545"	78088	0.08736629667003028
2.2926136363636362	1.132780170020104E-4	0.436183395291202	0.44595001505570614	82	4	false	"CpCp13_RS09985"	18	228.0731707317073	0	82	0	0.9972497582205029	false	0	"CpCp13_RS09150"	68430	0.16118245281392743
2.368371212121212	4.493523872645215E-5	0.42223110755697724	0.47489823609226595	67	4	false	"CpCp13_RS03505"	18	230.73134328358208	0	67	0	0.9970885718891038	false	0	"CpCp13_RS06660"	26946	0.1813925654745142
2.534564393939394	5.4670344367052835E-5	0.39454511488884736	0.5042517006802721	50	4	false	"CpCp13_RS05690"	18	157.81632653061226	0	50	1	0.996734969374597	false	0	"CpCp13_RS09545"	26726	0.1638798821709369
2.287878787878788	1.3714474728243712E-4	0.43708609271523174	0.41901776384535006	98	4	false	"CpCp13_RS01110"	18	202.72727272727272	0	98	10	0.9972598323662153	false	0	"CpCp13_RS02560"	74060	0.14286629508616824
2.455965909090909	2.527398262159065E-4	0.4071717755928282	0.3623693379790941	42	4	false	"CpCp13_RS07900"	18	120.33333333333333	0	42	0	0.9969022001934236	false	0	"CpCp13_RS09200"	60988	0.10821342925659472
2.6974431818181817	8.813826286582676E-5	0.37072143233280674	0.5433333333333333	36	4	false	"CpCp13_RS03875"	18	74.6	0	36	11	0.996388418762089	false	0	"CpCp13_RS09680"	17548	0.11337386018237082
2.706439393939394	6.572427343961855E-4	0.36948915325402376	0.25333333333333335	69	4	false	"CpCp13_RS02295"	18	41.05882352941177	0	69	18	0.9963692778852353	false	0	"CpCp13_RS02025"	84770	0.0706692315480409
2.3428030303030303	0.0010696807915154052	0.42683912691996767	0.28215892053973013	142	4	false	"CpCp13_RS01480"	18	113.25	0	142	26	0.9971429722759511	false	0	"CpCp13_RS04060"	258260	0.0889630793401414
2.6070075757575757	9.80171517825113E-5	0.3835815474028333	0.4025974025974026	22	4	false	"CpCp13_RS03635"	18	116.04545454545455	0	22	0	0.9965808349451967	false	0	"CpCp13_RS01770"	20894	0.1344675023701675
2.1240530303030303	0.002190363032984932	0.4707980383415069	0.19279092928828623	262	4	false	"CpCp13_RS05500"	18	121.87336244541484	0	262	33	0.9976083978078659	false	0	"CpCp13_RS07410"	618396	0.07513770804279583
2.2959280303030303	8.458738670730415E-5	0.4355537224169932	0.42740384615384613	65	4	false	"CpCp13_RS04320"	18	238.7846153846154	0	65	0	0.9972427063185042	false	0	"CpCp13_RS06360"	57562	0.16733329739636676
2.350378787878788	5.614233142956478E-5	0.4254633360193392	0.463973063973064	55	4	false	"CpCp13_RS06595"	18	233.98181818181817	0	55	0	0.9971268536428111	false	0	"CpCp13_RS01425"	34504	0.17672342762977203
2.4114583333333335	3.358466026075537E-5	0.4146868250539957	0.4669387755102041	50	4	false	"CpCp13_RS07070"	18	222.0	0	50	0	0.9969968971631206	false	0	"CpCp13_RS04810"	21266	0.18301731244847486
2.249526515151515	0.0017852248553436863	0.44453799200168387	0.19867227979274613	218	4	false	"CpCp13_RS05655"	18	107.98963730569949	0	218	25	0.9973414329464861	false	0	"CpCp13_RS04725"	400428	0.07735647371468445
2.5265151515151514	4.370399303295784E-4	0.39580209895052476	0.388398823843892	113	4	false	"CpCp13_RS00430"	18	104.95402298850574	0	113	26	0.9967520954223082	false	0	"CpCp13_RS05090"	112522	0.1142045951996798
2.172348484848485	0.0026969145660448303	0.46033129904097647	0.16497233748271092	269	4	false	"CpCp13_RS07760"	19	107.98755186721992	0	269	28	0.9975056415215989	false	0	"CpCp13_RS00165"	718306	0.07146760547135667
2.297348484848485	3.7441892575109227E-4	0.43528441879637264	0.32124542124542127	115	4	false	"CpCp13_RS01910"	19	157.41904761904763	0	115	10	0.9972396840747905	false	0	"CpCp13_RS08855"	126368	0.11365996217981778
2.476325757575758	5.346630856106726E-5	0.40382409177820267	0.39855072463768115	24	4	false	"CpCp13_RS01675"	19	152.29166666666666	0	24	0	0.9968588813668601	false	0	"CpCp13_RS03280"	19498	0.13832122313048745
2.3603219696969697	8.901948981453829E-5	0.42367101303911736	0.4623015873015873	64	4	false	"CpCp13_RS01875"	19	212.875	0	64	0	0.9971056979368149	false	0	"CpCp13_RS03950"	48478	0.16412875867386276
2.449810606060606	2.4329498948207542E-4	0.40819482025512177	0.42713404738721195	79	4	false	"CpCp13_RS07800"	19	139.126582278481	0	79	0	0.9969152965828497	false	0	"CpCp13_RS05445"	92270	0.12799133604276083
2.530776515151515	4.7100086724018137E-4	0.3951356407857811	0.3076923076923077	26	4	false	"CpCp13_RS07780"	19	104.8076923076923	0	26	0	0.996743028691167	false	0	"CpCp13_RS08945"	43758	0.1075264571157795
2.418560606060606	1.3346402845188798E-4	0.413469068128426	0.42645074224021595	45	4	false	"CpCp13_RS07680"	19	166.28205128205127	0	45	6	0.9969817859445519	false	0	"CpCp13_RS00975"	40800	0.13973281620340444
2.2334280303030303	0.001184110009942038	0.4477422090311639	0.25102201257861634	187	4	false	"CpCp13_RS01965"	19	139.36875	0	187	27	0.9973756850419085	false	0	"CpCp13_RS08890"	315752	0.09539271047227926
2.316287878787879	9.391926887785049E-4	0.4317252657399836	0.25582354153782727	113	4	false	"CpCp13_RS07125"	19	115.91919191919192	0	113	14	0.9971993874919407	false	0	"CpCp13_RS10355"	194112	0.08599346581542427
2.550189393939394	4.5007891823214186E-5	0.3921277385815076	0.4155844155844156	22	4	false	"CpCp13_RS06255"	19	156.5	0	22	0	0.996701724693746	false	0	"CpCp13_RS05995"	13306	0.16525871172122492
2.4711174242424243	1.1702055362512915E-5	0.4046752251389155	0.5584677419354839	32	4	false	"CpCp13_RS01630"	19	233.5	0	32	0	0.9968699629271438	false	0	"CpCp13_RS04215"	7492	0.20904207699194272
2.580965909090909	2.1330559672064388E-4	0.38745184369840396	0.357487922705314	57	4	false	"CpCp13_RS08265"	19	96.30434782608695	0	57	11	0.996636242746615	false	0	"CpCp13_RS10015"	41768	0.11343268295181032
2.633049242424242	1.8193759803154832E-4	0.37978780794821076	0.30666666666666664	31	4	false	"CpCp13_RS10655"	19	73.76	0	31	6	0.9965254271437782	false	0	"CpCp13_RS01730"	24946	0.09591677503250975
2.3546401515151514	7.573355273139652E-5	0.42469334405791276	0.38549075391180654	38	4	false	"CpCp13_RS02375"	19	183.73684210526315	0	38	0	0.99711778691167	false	0	"CpCp13_RS08705"	45342	0.1378370908516603
2.2679924242424243	1.4583276767715506E-4	0.44091858037578285	0.3848648648648649	75	4	false	"CpCp13_RS06845"	19	218.84	0	75	0	0.9973021437782076	false	0	"CpCp13_RS06940"	108382	0.14796484110885733
2.3541666666666665	1.33666646067702E-4	0.42477876106194695	0.40512820512820513	66	4	false	"CpCp13_RS04715"	19	217.86363636363637	0	66	0	0.9971187943262411	false	0	"CpCp13_RS01245"	76794	0.16732998184611086
2.3172348484848486	9.338483100457464E-4	0.43154883530854105	0.3283809523809524	153	4	false	"CpCp13_RS06780"	19	113.66666666666667	0	153	27	0.9971973726627982	false	0	"CpCp13_RS02720"	284486	0.08630726398380156
2.4053030303030303	1.24812388652937E-4	0.415748031496063	0.43028846153846156	65	4	false	"CpCp13_RS08985"	19	167.66153846153847	0	65	0	0.9970099935525468	false	0	"CpCp13_RS08130"	46638	0.1386778647324553
2.1822916666666665	9.334372062379326E-4	0.45823389021479716	0.29172488743983854	131	4	false	"CpCp13_RS09615"	19	159.40350877192984	0	131	17	0.9974844858156028	false	0	"CpCp13_RS07170"	385314	0.09876301658731712
2.347537878787879	1.318753080861914E-4	0.4259782170229931	0.39558232931726905	89	4	false	"CpCp13_RS01305"	19	194.0952380952381	0	89	5	0.9971328981302385	false	0	"CpCp13_RS01635"	56608	0.1490746836368956
2.4635416666666665	1.355012176485078E-4	0.40591966173361527	0.4020319303338171	53	4	false	"CpCp13_RS02480"	19	147.64150943396226	0	53	0	0.9968860815602837	false	0	"CpCp13_RS06735"	48408	0.1362006544593748
2.128787878787879	0.003970210508724545	0.4697508896797153	0.1749800796812749	306	4	false	"CpCp13_RS05870"	19	108.93227091633466	0	306	55	0.9975983236621535	false	0	"CpCp13_RS07015"	1139520	0.06851086221153123
2.2821969696969697	0.0014661921917856517	0.43817427385892116	0.17988980716253444	149	4	false	"CpCp13_RS07670"	19	90.75206611570248	0	149	28	0.9972719213410702	false	0	"CpCp13_RS03840"	319898	0.06500864334935708
2.481534090909091	3.310737702272024E-5	0.4029765311963366	0.4334677419354839	32	4	false	"CpCp13_RS07715"	19	184.15625	0	32	0	0.9968477998065765	false	0	"CpCp13_RS02750"	13662	0.17035730804810362
2.3115530303030303	2.0168231620402126E-4	0.43260958623514956	0.34658385093167704	78	4	false	"CpCp13_RS00785"	19	169.5	0	78	8	0.9972094616376532	false	0	"CpCp13_RS00050"	75858	0.12211815561959655
2.758996212121212	1.0373470202620456E-4	0.36245066071735027	0.3904761904761905	25	4	false	"CpCp13_RS04840"	19	59.285714285714285	0	25	4	0.9962574548678272	false	0	"CpCp13_RS08735"	11636	0.11579241071428571
2.2864583333333335	1.4437739175342698E-4	0.4373576309794988	0.416491963661775	54	4	false	"CpCp13_RS03470"	19	204.07407407407408	0	54	0	0.9972628546099291	false	0	"CpCp13_RS08655"	84462	0.14006456696916547
2.5520833333333335	2.515202599985985E-4	0.39183673469387753	0.3960674157303371	119	4	false	"CpCp13_RS08675"	19	105.10112359550561	0	119	30	0.996697695035461	false	0	"CpCp13_RS04850"	74034	0.1205288114627358
2.3735795454545454	0.0015001411939611093	0.4213046080191502	0.2624042624042624	101	3	false	"CpCp13_RS07895"	19	84.75641025641026	0	101	23	0.9970774903288201	false	0	"CpCp13_RS08555"	248832	0.06807743795695603
2.9195075757575757	3.7613419780654573E-5	0.34252351605578985	0.3047619047619048	20	4	false	"CpCp13_RS00715"	19	33.53333333333333	0	20	5	0.9959159413281754	false	0	"CpCp13_RS02860"	3646	0.13687074829931972
2.5014204545454546	5.884816100157906E-4	0.39977285633162973	0.2865761689291101	68	4	false	"CpCp13_RS02020"	19	82.84615384615384	0	68	16	0.9968054883945842	false	0	"CpCp13_RS00230"	100608	0.0823520415965744
2.8082386363636362	1.9706965802838457E-4	0.35609509357612545	0.3202614379084967	25	4	false	"CpCp13_RS06265"	19	45.111111111111114	0	25	7	0.9961526837524178	false	0	"CpCp13_RS07820"	26506	0.11002710027100271
2.4545454545454546	0.0020422444070824245	0.4074074074074074	0.17482517482517482	91	3	false	"CpCp13_RS07810"	19	58.68181818181818	0	91	25	0.9969052224371374	false	0	"CpCp13_RS02370"	238498	0.05403482337183994
2.4351325757575757	8.523641924772598E-4	0.4106552595761229	0.2535380909364649	96	4	false	"CpCp13_RS05840"	19	85.89024390243902	0	96	14	0.9969465264345584	false	0	"CpCp13_RS00255"	161620	0.07723942796981927
2.337594696969697	4.647621926625334E-5	0.42779015596516107	0.4396103896103896	56	4	false	"CpCp13_RS07665"	19	235.16071428571428	0	56	0	0.9971540538362347	false	0	"CpCp13_RS08980"	32480	0.1741931216931217
2.568655303030303	3.69749820307078E-4	0.38930875576036866	0.26436781609195403	32	4	false	"CpCp13_RS01070"	19	80.86666666666666	0	32	2	0.9966624355254674	false	0	"CpCp13_RS02135"	64674	0.09127163280662152
2.606060606060606	7.795063337813475E-4	0.38372093023255816	0.2278127183787561	71	4	false	"CpCp13_RS02815"	19	53.68518518518518	0	71	17	0.9965828497743391	false	0	"CpCp13_RS09095"	82840	0.06882716049382716
2.815340909090909	3.847858239585315E-4	0.355196770938446	0.1794871794871795	35	4	false	"CpCp13_RS04825"	19	31.185185185185187	0	35	8	0.996137572533849	false	0	"CpCp13_RS00540"	41122	0.08250048990789731
2.7992424242424243	1.728814105778538E-4	0.3572395128552097	0.47333333333333333	25	4	false	"CpCp13_RS10495"	19	52.16	0	25	0	0.9961718246292715	false	0	"CpCp13_RS10585"	22062	0.11314533622559653
2.378787878787879	9.465882794533866E-5	0.4203821656050955	0.4618357487922705	46	4	false	"CpCp13_RS06300"	19	213.2608695652174	0	46	0	0.9970664087685365	false	0	"CpCp13_RS09105"	44114	0.1667403202230003
2.387784090909091	6.327379686375715E-5	0.4187983343248067	0.4699248120300752	57	4	false	"CpCp13_RS08180"	19	222.21052631578948	0	57	0	0.9970472678916829	false	0	"CpCp13_RS08660"	33442	0.1789134672429867
2.394412878787879	1.4898508168224804E-4	0.4176389163535693	0.5198653198653199	55	4	false	"CpCp13_RS02615"	19	154.92727272727274	0	55	0	0.9970331640876854	false	0	"CpCp13_RS06355"	63866	0.12565066725650667
2.2679924242424243	9.227910605570124E-4	0.44091858037578285	0.256140350877193	140	4	false	"CpCp13_RS07175"	19	119.65217391304348	0	140	25	0.9973021437782076	false	0	"CpCp13_RS08745"	266940	0.08355598736944377
2.316287878787879	7.606417674898845E-4	0.4317252657399836	0.2637915543575921	131	4	false	"CpCp13_RS04210"	19	118.4622641509434	0	131	25	0.9971993874919407	false	0	"CpCp13_RS00800"	197416	0.08814156558849955
2.6917613636363638	4.448206071994571E-5	0.37150395778364115	0.5029239766081871	19	4	false	"CpCp13_RS08415"	19	101.47368421052632	0	19	0	0.9964005077369439	false	0	"CpCp13_RS05035"	8946	0.14454940770730246
2.4545454545454546	0.0011170136589240104	0.4074074074074074	0.20429009193054137	103	4	false	"CpCp13_RS09130"	19	71.29213483146067	0	103	14	0.9969052224371374	false	0	"CpCp13_RS06035"	186262	0.0668781752640344
2.539299242424242	5.108148603377302E-4	0.393809435017714	0.29802955665024633	38	4	false	"CpCp13_RS08800"	19	75.13793103448276	0	38	9	0.9967248952288845	false	0	"CpCp13_RS07490"	55574	0.07939053728949479
2.6112689393939394	8.715969999810218E-4	0.38295557570262917	0.17819148936170212	62	4	false	"CpCp13_RS09260"	19	48.041666666666664	0	62	14	0.9965717682140555	false	0	"CpCp13_RS04315"	88922	0.06190936426116839
2.4119318181818183	1.2852653593601254E-4	0.414605418138987	0.40805946791862285	81	4	false	"CpCp13_RS06375"	19	165.30555555555554	0	81	9	0.9969958897485494	false	0	"CpCp13_RS09020"	38406	0.1397341974265051
2.4488636363636362	6.555492257154892E-5	0.4083526682134571	0.40641711229946526	34	4	false	"CpCp13_RS10820"	19	175.6764705882353	0	34	0	0.9969173114119922	false	0	"CpCp13_RS09645"	30302	0.15383228597919027
2.398200757575758	7.712331333299873E-5	0.4169792694965449	0.4363233665559247	43	4	false	"CpCp13_RS05415"	19	217.13953488372093	0	43	0	0.9970251047711154	false	0	"CpCp13_RS04755"	32812	0.17582148573580642
2.2978219696969697	5.291102409384175E-4	0.4351947249124253	0.27728026533996686	160	4	false	"CpCp13_RS05965"	19	119.52592592592593	0	160	25	0.9972386766602191	false	0	"CpCp13_RS09715"	131160	0.08827616390393347
2.3806818181818183	5.0223235935120985E-5	0.4200477326968973	0.4768170426065163	60	4	false	"CpCp13_RS00965"	19	207.6315789473684	0	60	3	0.9970623791102514	false	0	"CpCp13_RS06085"	31208	0.16452581533071983
2.399147727272727	7.495234583538659E-4	0.4168146832445234	0.2845528455284553	105	4	false	"CpCp13_RS10475"	19	102.17073170731707	0	105	23	0.9970230899419729	false	0	"CpCp13_RS03005"	153776	0.0857137010967425
2.450284090909091	9.940714850551638E-4	0.40811594202898555	0.25191146881287724	99	4	false	"CpCp13_RS00355"	19	72.21126760563381	0	99	28	0.9969142891682786	false	0	"CpCp13_RS02290"	148890	0.06618814629297323
2.2954545454545454	1.187506664494295E-4	0.43564356435643564	0.3671497584541063	47	4	false	"CpCp13_RS03690"	19	190.30434782608697	0	47	1	0.9972437137330754	false	0	"CpCp13_RS06135"	59726	0.13133495364119183
2.293560606060606	7.401489445425827E-5	0.4360033030553262	0.4377049180327869	61	4	false	"CpCp13_RS09705"	19	228.7377049180328	0	61	0	0.9972477433913604	false	0	"CpCp13_RS04900"	62586	0.15884562841530053
2.280776515151515	2.0636569713258185E-4	0.43844716628607017	0.3957983193277311	91	4	false	"CpCp13_RS04790"	19	199.31764705882352	0	91	6	0.9972749435847841	false	0	"CpCp13_RS04765"	101904	0.13812726753903223
2.2556818181818183	0.0020008970477640086	0.44332493702770776	0.18454585399535497	201	4	false	"CpCp13_RS05235"	19	103.83240223463687	0	201	22	0.99732833655706	false	0	"CpCp13_RS07240"	398162	0.07432527003195195
2.3740530303030303	8.399985713425181E-4	0.42122058236936577	0.32396039603960397	128	4	false	"CpCp13_RS02890"	19	123.08910891089108	0	128	27	0.9970764829142489	false	0	"CpCp13_RS06460"	212068	0.10072758503346244
2.6709280303030303	2.653334803238282E-5	0.3744017018259174	0.532608695652174	24	4	false	"CpCp13_RS06950"	19	106.04166666666667	0	24	0	0.9964448339780787	false	0	"CpCp13_RS01275"	9262	0.14447093551316983
2.2163825757575757	0.002180173911529986	0.4511856440931425	0.1677937316658947	287	4	false	"CpCp13_RS06880"	19	104.23529411764706	0	287	32	0.9974119519664733	false	0	"CpCp13_RS07370"	480728	0.0742416624769566
2.34375	0.0022600422328276797	0.4266666666666667	0.19301986309056224	166	4	false	"CpCp13_RS09085"	19	82.90298507462687	0	166	32	0.9971409574468085	false	0	"CpCp13_RS03375"	437546	0.0661635954306679
2.3925189393939394	2.863061158716582E-5	0.4179695230556105	0.52322206095791	53	4	false	"CpCp13_RS03390"	19	230.8679245283019	0	53	0	0.9970371937459703	false	0	"CpCp13_RS07625"	18044	0.18513867243648907
2.303030303030303	9.104079726439542E-5	0.43421052631578944	0.40326340326340326	67	4	false	"CpCp13_RS01940"	19	226.16666666666666	0	67	1	0.9972275950999355	false	0	"CpCp13_RS04170"	63608	0.15994813767090996
2.3423295454545454	7.922462159881442E-4	0.4269254093389933	0.21942544459644323	96	4	false	"CpCp13_RS08470"	19	109.45348837209302	0	96	10	0.9971439796905223	false	0	"CpCp13_RS04055"	166156	0.08374406149356774
2.3740530303030303	4.7565868275440244E-5	0.42122058236936577	0.5097643097643098	55	4	false	"CpCp13_RS08720"	19	254.14545454545456	0	55	0	0.9970764829142489	false	0	"CpCp13_RS02695"	27786	0.19870637571966734
2.518939393939394	0.0010351746798900542	0.3969924812030075	0.31951710261569416	90	4	false	"CpCp13_RS01400"	19	94.85915492957747	0	90	19	0.9967682140554481	false	0	"CpCp13_RS05085"	152808	0.1002739481285174
2.3920454545454546	0.0014446821310438007	0.4180522565320665	0.2240506329113924	98	4	false	"CpCp13_RS03810"	19	74.175	0	98	18	0.9970382011605416	false	0	"CpCp13_RS04510"	250818	0.06155601659751037
2.6387310606060606	1.414212694522806E-4	0.37897003409294816	0.43859649122807015	48	4	false	"CpCp13_RS03430"	19	72.17948717948718	0	48	9	0.9965133381689233	false	0	"CpCp13_RS08500"	35216	0.09833717599385175
2.336647727272727	1.2403920560320105E-4	0.4279635258358663	0.39238498149127443	62	4	false	"CpCp13_RS01260"	19	204.66129032258064	0	62	0	0.9971560686653771	false	0	"CpCp13_RS02725"	59316	0.1521645281208778
2.4161931818181817	2.3220830288007058E-4	0.4138741916519695	0.3548780487804878	44	4	false	"CpCp13_RS08680"	19	130.7560975609756	0	44	3	0.9969868230174082	false	0	"CpCp13_RS04225"	53280	0.10869168542059486
2.534090909090909	9.337202554906698E-4	0.39461883408071746	0.24713804713804713	67	4	false	"CpCp13_RS09350"	19	59.38181818181818	0	67	12	0.9967359767891683	false	0	"CpCp13_RS01660"	121842	0.06364610737601091
2.430397727272727	7.616318205480851E-4	0.4114552893045003	0.3039614957423177	90	4	false	"CpCp13_RS08755"	19	110.10810810810811	0	90	16	0.9969566005802708	false	0	"CpCp13_RS01350"	124282	0.09701154899392785
2.444602272727273	4.684195787377476E-5	0.4090644973852411	0.4856743535988819	57	4	false	"CpCp13_RS06930"	19	184.8148148148148	0	57	3	0.9969263781431335	false	0	"CpCp13_RS00640"	21192	0.16226059246252397
2.6581439393939394	7.354004127569193E-4	0.3762023512646954	0.26105442176870747	66	4	false	"CpCp13_RS08120"	19	49.857142857142854	0	66	17	0.9964720341715022	false	0	"CpCp13_RS01625"	89302	0.07397202204323866
2.4043560606060606	2.5713848656579868E-5	0.4159117762898779	0.5152941176470588	51	4	false	"CpCp13_RS08270"	19	248.35294117647058	0	51	0	0.9970120083816892	false	0	"CpCp13_RS06500"	17474	0.20174893678023606
2.2045454545454546	0.0038142436417227077	0.4536082474226804	0.15493093789239834	231	4	false	"CpCp13_RS04260"	19	92.91176470588235	0	231	27	0.9974371373307543	false	0	"CpCp13_RS03945"	758704	0.06290573101278427
2.2803030303030303	1.0122538321764363E-4	0.43853820598006643	0.4259493670886076	80	4	false	"CpCp13_RS04680"	19	222.4375	0	80	0	0.9972759509993553	false	0	"CpCp13_RS03315"	65616	0.1538295297372061
2.353219696969697	1.6850421045389868E-4	0.42494969818913486	0.44646098003629764	58	4	false	"CpCp13_RS00750"	19	162.29310344827587	0	58	0	0.9971208091553836	false	0	"CpCp13_RS02995"	80798	0.1236990117746005
2.303977272727273	5.037622232363582E-5	0.43403205918618987	0.4661016949152542	60	4	false	"CpCp13_RS07915"	19	261.1	0	60	0	0.9972255802707931	false	0	"CpCp13_RS06140"	42320	0.18452296819787986
2.4820075757575757	6.403578192154611E-5	0.40289965661961086	0.519672131147541	61	4	false	"CpCp13_RS04905"	19	171.85245901639345	0	61	0	0.9968467923920051	false	0	"CpCp13_RS06105"	33274	0.1646096350731738
2.3125	1.1377512902232185E-4	0.43243243243243246	0.38461538461538464	40	4	false	"CpCp13_RS06665"	19	199.575	0	40	0	0.9972074468085106	false	0	"CpCp13_RS03940"	55184	0.14074400564174894
2.450284090909091	0.0014182573570212253	0.40811594202898555	0.2557460317460317	153	4	false	"CpCp13_RS01585"	19	91.88888888888889	0	153	27	0.9969142891682786	false	0	"CpCp13_RS03600"	290264	0.08869583869583869
2.284090909090909	1.0043457092328381E-4	0.43781094527363185	0.4147444595205789	67	4	false	"CpCp13_RS02335"	19	211.40298507462686	0	67	0	0.9972678916827853	false	0	"CpCp13_RS05925"	61720	0.14559434233789728
2.462121212121212	0.0012023388443306803	0.4061538461538462	0.18045112781954886	70	4	false	"CpCp13_RS09295"	19	67.14035087719299	0	70	13	0.9968891038039974	false	0	"CpCp13_RS09625"	156230	0.06205208029315433
2.347537878787879	5.97045184689378E-5	0.4259782170229931	0.3998015873015873	64	4	false	"CpCp13_RS02590"	19	212.515625	0	64	0	0.9971328981302385	false	0	"CpCp13_RS01850"	37744	0.15990641459744168
2.711647727272727	4.150040354260672E-4	0.36877946568884235	0.229064039408867	45	4	false	"CpCp13_RS08640"	19	43.86206896551724	0	45	16	0.9963581963249516	false	0	"CpCp13_RS01090"	45704	0.07536437966583719
2.3461174242424243	2.3981460631527886E-4	0.4262361251261352	0.4428904428904429	70	4	false	"CpCp13_RS10045"	19	161.46969696969697	0	70	4	0.9971359203739523	false	0	"CpCp13_RS10745"	99666	0.1223255280073462
2.290719696969697	0.0011404743723810577	0.43654402645721374	0.27871148459383754	113	4	false	"CpCp13_RS01425"	19	112.76470588235294	0	113	28	0.9972537878787879	false	0	"CpCp13_RS03015"	240198	0.07974873117563858
2.2547348484848486	2.543550086199788E-4	0.4435111297774044	0.397887323943662	74	4	false	"CpCp13_RS10015"	19	203.26388888888889	0	74	2	0.9973303513862024	false	0	"CpCp13_RS07335"	126558	0.13496938173232995
2.4199810606060606	9.660482662905992E-5	0.41322637448640187	0.32873563218390806	30	4	false	"CpCp13_RS06735"	19	135.03333333333333	0	30	0	0.9969787637008382	false	0	"CpCp13_RS05595"	32630	0.1128098022834865
2.352272727272727	5.6666592221235074E-5	0.42512077294685996	0.46130952380952384	64	4	false	"CpCp13_RS08655"	19	231.875	0	64	0	0.9971228239845261	false	0	"CpCp13_RS04655"	35678	0.17566287878787878
2.5516098484848486	1.0054082015834857E-4	0.391909445166079	0.48079658605974396	38	4	false	"CpCp13_RS08980"	19	145.39473684210526	0	38	0	0.9966987024500322	false	0	"CpCp13_RS06040"	29824	0.15907520442243464
2.3764204545454546	9.246762464161383E-5	0.42080095636580994	0.34759358288770054	36	4	false	"CpCp13_RS08660"	19	154.91176470588235	0	36	2	0.9970714458413927	false	0	"CpCp13_RS04870"	43668	0.12008663930688554
2.366003787878788	1.415072732805768E-4	0.42265359215529313	0.40575396825396826	69	4	false	"CpCp13_RS06355"	19	182.296875	0	69	5	0.99709360896196	false	0	"CpCp13_RS02140"	53942	0.1420864185502728
2.430871212121212	1.5593161654842036E-4	0.4113751460849241	0.40225988700564974	67	4	false	"CpCp13_RS06085"	19	150.23333333333332	0	67	7	0.9969555931656996	false	0	"CpCp13_RS08815"	49488	0.13029777392309916
2.574810606060606	1.1538503331536634E-4	0.3883780801765355	0.3794466403162055	26	4	false	"CpCp13_RS07625"	19	137.7391304347826	0	26	3	0.9966493391360413	false	0	"CpCp13_RS05440"	27938	0.15304347826086956
2.271780303030303	0.0016856639974273013	0.44018340975406417	0.1936931881943665	161	4	false	"CpCp13_RS02695"	19	106.38059701492537	0	161	27	0.9972940844616376	false	0	"CpCp13_RS10485"	294450	0.07571572741275827
2.434659090909091	1.1298511896691319E-4	0.4107351225204201	0.42314436002337813	68	4	false	"CpCp13_RS00640"	19	156.15254237288136	0	68	9	0.9969475338491296	false	0	"CpCp13_RS10205"	41470	0.13484675507157284
2.5303030303030303	2.5035335167104274E-4	0.39520958083832336	0.42348008385744235	63	4	false	"CpCp13_RS02995"	19	119.79629629629629	0	63	9	0.9967440361057383	false	0	"CpCp13_RS05310"	60324	0.12663456268107431
2.6074810606060606	0.0010400405172712706	0.38351189395315055	0.18929110105580693	63	4	false	"CpCp13_RS06140"	19	54.84615384615385	0	63	11	0.9965798275306254	false	0	"CpCp13_RS09525"	117914	0.07056232056232056
2.6463068181818183	6.05080070688714E-4	0.37788513150831987	0.24390243902439024	64	4	false	"CpCp13_RS02880"	19	50.1219512195122	0	64	23	0.9964972195357834	false	0	"CpCp13_RS10270"	61918	0.07049500874755583
2.1306818181818183	0.0039764988625114244	0.4693333333333333	0.1620857626006411	333	4	false	"CpCp13_RS02570"	19	109.91843971631205	0	333	51	0.9975942940038685	false	0	"CpCp13_RS00480"	896838	0.07068709949602062
2.3536931818181817	0.0022783866094391223	0.42486421243210626	0.2646230841413825	171	4	false	"CpCp13_RS09670"	19	99.4748201438849	0	171	32	0.9971198017408124	false	0	"CpCp13_RS03760"	414652	0.0810715730594009
2.340435606060606	5.577132475709447E-4	0.4272708881246207	0.3269428983714698	116	4	false	"CpCp13_RS04525"	19	128.23232323232324	0	116	17	0.9971480093488072	false	0	"CpCp13_RS08930"	180198	0.09894469385210126
2.6979166666666665	5.1086565340214995E-5	0.3706563706563707	0.48947368421052634	20	4	false	"CpCp13_RS10435"	19	99.8	0	20	0	0.9963874113475177	false	0	"CpCp13_RS07360"	11454	0.15353846153846154
2.493371212121212	7.843645156490427E-4	0.40106342575009496	0.2743827160493827	105	4	false	"CpCp13_RS04930"	19	92.1358024691358	0	105	24	0.9968226144422954	false	0	"CpCp13_RS06570"	134410	0.09269195419430161
2.3802083333333335	9.697207103450253E-5	0.4201312910284464	0.38824383164005805	53	4	false	"CpCp13_RS00475"	19	179.49056603773585	0	53	0	0.9970633865248227	false	0	"CpCp13_RS02880"	47796	0.14155407416225224
2.2675189393939394	1.9138363562964117E-4	0.4410106494048862	0.37798485730926035	109	4	false	"CpCp13_RS05510"	19	188.35294117647058	0	109	7	0.9973031511927789	false	0	"CpCp13_RS08690"	95014	0.1298090566343698
2.7088068181818183	1.6591763319113088E-5	0.36916622968012586	0.5698005698005698	28	4	false	"CpCp13_RS01935"	19	116.96296296296296	0	28	1	0.9963642408123792	false	0	"CpCp13_RS00275"	5530	0.17775526286164584
2.3011363636363638	0.0018642012989396309	0.4345679012345679	0.24647887323943662	90	4	false	"CpCp13_RS05835"	19	121.34722222222223	0	90	18	0.9972316247582205	false	0	"CpCp13_RS03355"	293822	0.08630670143828038
2.7608901515151514	2.7327611752048773E-4	0.36220202366660953	0.27692307692307694	34	4	false	"CpCp13_RS04750"	19	40.69230769230769	0	34	8	0.9962534252095423	false	0	"CpCp13_RS00215"	24158	0.08390166534496431
2.559659090909091	0.0012626511247031675	0.390677025527192	0.19683257918552036	65	3	false	"CpCp13_RS03065"	19	49.75	0	65	13	0.9966815764023211	false	0	"CpCp13_RS05120"	128886	0.056705552144548727
2.6666666666666665	2.3760143193864164E-4	0.375	0.4339622641509434	80	4	false	"CpCp13_RS09660"	19	83.9245283018868	0	80	27	0.9964539007092198	false	0	"CpCp13_RS00365"	41890	0.1263923619004319
2.524147727272727	2.5905580020843603E-4	0.39617332583005066	0.33497536945812806	35	4	false	"CpCp13_RS01490"	19	97.03448275862068	0	35	6	0.9967571324951644	false	0	"CpCp13_RS08135"	44002	0.09837728194726167
2.3451704545454546	3.309313512019671E-4	0.42640823743185946	0.33182035355948397	114	4	false	"CpCp13_RS06765"	19	143.45652173913044	0	114	22	0.9971379352030948	false	0	"CpCp13_RS03030"	104614	0.11077723686419338
2.446496212121212	8.300335723338963E-5	0.4087478227211148	0.484984984984985	40	4	false	"CpCp13_RS03385"	19	184.8918918918919	0	40	3	0.9969223484848485	false	0	"CpCp13_RS10500"	35846	0.16161878661878662
2.3271780303030303	6.62288217859169E-5	0.42970498474059005	0.43015780245470486	59	4	false	"CpCp13_RS03325"	19	216.84745762711864	0	59	0	0.9971762169568021	false	0	"CpCp13_RS02570"	43520	0.15851422341163643
2.409564393939394	8.103223706467496E-5	0.4150127726468854	0.40425531914893614	49	4	false	"CpCp13_RS05155"	19	177.08510638297872	0	49	2	0.9970009268214056	false	0	"CpCp13_RS03925"	32078	0.1456291993281075
2.742424242424242	1.5996524763370147E-4	0.36464088397790057	0.4166666666666667	29	4	false	"CpCp13_RS09315"	19	70.75	0	29	5	0.9962927143778207	false	0	"CpCp13_RS10315"	18278	0.12747747747747748
2.5047348484848486	3.9503790876641443E-4	0.3992438563327032	0.3707482993197279	62	4	false	"CpCp13_RS02060"	19	106.6734693877551	0	62	13	0.9967984364925854	false	0	"CpCp13_RS02190"	69080	0.1066734693877551
2.4820075757575757	4.400436363465882E-5	0.40289965661961086	0.47394957983193275	38	4	false	"CpCp13_RS10025"	19	168.02857142857144	0	38	3	0.9968467923920051	false	0	"CpCp13_RS06170"	15842	0.1542962088416634
2.5355113636363638	2.1916711880847877E-4	0.39439775910364144	0.3118279569892473	39	4	false	"CpCp13_RS09800"	19	95.87096774193549	0	39	8	0.9967329545454545	false	0	"CpCp13_RS09920"	41192	0.10081069163189851
2.410037878787879	3.25348107380426E-5	0.4149312377210216	0.48282828282828283	45	4	false	"CpCp13_RS02975"	19	227.33333333333334	0	45	0	0.9969999194068343	false	0	"CpCp13_RS06935"	18000	0.18633879781420765
2.444602272727273	5.886744319063564E-4	0.4090644973852411	0.37806637806637805	137	4	false	"CpCp13_RS05770"	19	121.75757575757575	0	137	38	0.9969263781431335	false	0	"CpCp13_RS10370"	156832	0.11305253087982893
2.4048295454545454	5.490199171272157E-5	0.4158298877731837	0.5120663650075414	52	4	false	"CpCp13_RS03320"	19	228.57692307692307	0	52	0	0.9970110009671179	false	0	"CpCp13_RS04570"	31752	0.18751183189247175
2.3418560606060606	1.1879161890989361E-4	0.4270117266477962	0.4325753569539926	62	4	false	"CpCp13_RS07745"	19	206.43548387096774	0	62	0	0.9971449871050935	false	0	"CpCp13_RS07990"	59652	0.1548653292355347
2.2869318181818183	1.265279746166789E-4	0.4372670807453416	0.41067390321121666	67	4	false	"CpCp13_RS09510"	19	226.07462686567163	0	67	0	0.9972618471953578	false	0	"CpCp13_RS05255"	74870	0.15688731912954312
2.125	0.003790126099381726	0.47058823529411764	0.1525843392138657	401	4	false	"CpCp13_RS02505"	19	105.0	0	401	41	0.9976063829787234	false	0	"CpCp13_RS07400"	928916	0.07046979865771812
2.491477272727273	0.0011487898388683035	0.4013683010262257	0.17194570135746606	63	4	false	"CpCp13_RS09840"	19	69.48076923076923	0	63	11	0.9968266441005803	false	0	"CpCp13_RS04535"	145068	0.06743838685586258
2.4384469696969697	7.237931953272541E-5	0.41009708737864076	0.3913978494623656	31	4	false	"CpCp13_RS07985"	19	148.19354838709677	0	31	0	0.9969394745325596	false	0	"CpCp13_RS07035"	30716	0.1279737032703772
2.428503787878788	6.009390445413912E-5	0.41177617469292255	0.3333333333333333	19	4	false	"CpCp13_RS05225"	19	167.3684210526316	0	19	0	0.9969606302385557	false	0	"CpCp13_RS01590"	17864	0.13877978528410578
2.8456439393939394	1.537702884786829E-4	0.351414309484193	0.2982456140350877	26	4	false	"CpCp13_RS03095"	19	40.26315789473684	0	26	7	0.9960730980012895	false	0	"CpCp13_RS10415"	14814	0.10193204530313124
2.5042613636363638	7.417355743744226E-5	0.3993193420306296	0.3201058201058201	30	4	false	"CpCp13_RS06290"	19	114.82142857142857	0	30	2	0.9967994439071567	false	0	"CpCp13_RS07890"	20648	0.10998221127531473
2.421401515151515	1.6286384135088676E-4	0.41298396558466954	0.5052631578947369	76	4	false	"CpCp13_RS03290"	19	159.4078947368421	0	76	0	0.9969757414571244	false	0	"CpCp13_RS09815"	75664	0.13873620081535432
2.475852272727273	2.2860002866210497E-4	0.40390131956397013	0.3391304347826087	54	4	false	"CpCp13_RS03085"	19	115.02173913043478	0	54	8	0.9968598887814314	false	0	"CpCp13_RS09670"	51990	0.10749695245835027
2.2703598484848486	0.003294973426645228	0.4404588112617309	0.2002348796241926	155	3	false	"CpCp13_RS00940"	19	98.34351145038168	0	155	24	0.9972971067053513	false	0	"CpCp13_RS10335"	610462	0.06974717124140545
2.476325757575758	1.1269660390645451E-4	0.40382409177820267	0.4258064516129032	31	4	false	"CpCp13_RS01525"	19	169.58064516129033	0	31	0	0.9968588813668601	false	0	"CpCp13_RS00885"	39996	0.15716463870369818
2.2926136363636362	1.2540539432717688E-4	0.436183395291202	0.3576923076923077	65	4	false	"CpCp13_RS02420"	19	204.69230769230768	0	65	0	0.9972497582205029	false	0	"CpCp13_RS05980"	73614	0.14234513747726543
2.474905303030303	2.703193410068316E-4	0.4040558637841974	0.2894736842105263	20	4	false	"CpCp13_RS09330"	19	135.95	0	20	0	0.9968619036105738	false	0	"CpCp13_RS00705"	30600	0.12280939476061427
2.293560606060606	1.7054346457478722E-4	0.4360033030553262	0.42198100407055633	76	4	false	"CpCp13_RS03640"	19	158.62686567164178	0	76	9	0.9972477433913604	false	0	"CpCp13_RS01925"	84830	0.1110832392658556
2.5288825757575757	2.0770730559646007E-4	0.39543156712226174	0.3616734143049933	49	4	false	"CpCp13_RS08480"	19	101.66666666666667	0	49	10	0.996747058349452	false	0	"CpCp13_RS09925"	51842	0.1057925771765522
2.1619318181818183	0.0027233789644214943	0.4625492772667542	0.21800103184653627	255	3	false	"CpCp13_RS06475"	19	112.89371980676329	0	255	48	0.9975278046421664	false	0	"CpCp13_RS05175"	810624	0.07222886743874811
2.459280303030303	0.0012720731586968275	0.4066230265691182	0.380124583514414	160	4	false	"CpCp13_RS06285"	19	104.0677966101695	0	160	42	0.9968951482914249	false	0	"CpCp13_RS08025"	240510	0.10152955766845805
2.3390151515151514	0.0019001694432667882	0.42753036437246966	0.17981246552675123	166	4	false	"CpCp13_RS00880"	19	87.02027027027027	0	166	18	0.997151031592521	false	0	"CpCp13_RS05250"	370664	0.06967195377923961
2.256628787878788	0.0015852351474052364	0.4431389005455308	0.1882664437012263	241	4	false	"CpCp13_RS05025"	19	107.32211538461539	0	241	33	0.9973263217279175	false	0	"CpCp13_RS02225"	366702	0.07850922851837262
2.3617424242424243	7.796938581042922E-5	0.4234161988773055	0.4380952380952381	76	4	false	"CpCp13_RS03850"	19	185.62857142857143	0	76	6	0.9971026756931012	false	0	"CpCp13_RS06945"	34694	0.1444580322401334
2.2391098484848486	2.3565982927011692E-4	0.44660604779023044	0.3472837022132797	71	4	false	"CpCp13_RS08340"	19	221.73239436619718	0	71	0	0.9973635960670535	false	0	"CpCp13_RS09820"	153078	0.14398207426376441
2.353219696969697	2.3283858731494575E-4	0.42494969818913486	0.37362637362637363	108	4	false	"CpCp13_RS06775"	19	167.06593406593407	0	108	17	0.9971208091553836	false	0	"CpCp13_RS03820"	85732	0.13052026098901098
2.5137310606060606	3.7603852635416976E-4	0.39781503107929933	0.32979591836734695	68	4	false	"CpCp13_RS01395"	19	70.22	0	68	18	0.9967792956157318	false	0	"CpCp13_RS08070"	66882	0.07179959100204499
2.3702651515151514	0.0013559460352807885	0.4218937275269677	0.24065161051462422	101	4	false	"CpCp13_RS01620"	19	81.5	0	101	27	0.9970845422308189	false	0	"CpCp13_RS08485"	234398	0.06483691328560064
2.3238636363636362	8.686209801629844E-5	0.430317848410758	0.42216142270861834	92	4	false	"CpCp13_RS09500"	19	200.06976744186048	0	92	6	0.9971832688588008	false	0	"CpCp13_RS02770"	48392	0.14787122501246155
2.394412878787879	4.342191397664098E-5	0.4176389163535693	0.46622369878183834	43	4	false	"CpCp13_RS05560"	19	217.11627906976744	0	43	0	0.9970331640876854	false	0	"CpCp13_RS07190"	26264	0.17341555836243405
2.477272727272727	2.385471015153431E-4	0.4036697247706422	0.38205980066445183	59	4	false	"CpCp13_RS04135"	19	119.4186046511628	0	59	16	0.9968568665377175	false	0	"CpCp13_RS04525"	49486	0.11191996687081798
2.4375	3.3767063274484744E-4	0.41025641025641024	0.31420765027322406	77	4	false	"CpCp13_RS00855"	19	107.47540983606558	0	77	16	0.9969414893617021	false	0	"CpCp13_RS06810"	71038	0.09477549368259751
2.308712121212121	1.6490567175672852E-4	0.43314191960623466	0.34077380952380953	66	4	false	"CpCp13_RS06720"	19	199.890625	0	66	2	0.9972155061250806	false	0	"CpCp13_RS09640"	70694	0.14277901785714286
2.2447916666666665	0.0019088090517715235	0.4454756380510441	0.2200135915732246	140	3	false	"CpCp13_RS07530"	19	91.8348623853211	0	140	31	0.9973515070921986	false	0	"CpCp13_RS10235"	391776	0.0618000419820465
2.5672348484848486	5.415225353072369E-4	0.38952416082626334	0.39376646180860403	96	4	false	"CpCp13_RS08935"	19	90.52941176470588	0	96	28	0.9966654577691811	false	0	"CpCp13_RS00995"	92486	0.10688242239044378
2.4398674242424243	1.340924094750702E-4	0.40985833495051427	0.32575757575757575	39	4	false	"CpCp13_RS03060"	19	137.63636363636363	0	39	6	0.9969364522888459	false	0	"CpCp13_RS10165"	34100	0.11854983948007204
2.4242424242424243	3.085427603151784E-4	0.4125	0.37531328320802004	63	4	false	"CpCp13_RS06110"	19	130.19298245614036	0	63	6	0.996969696969697	false	0	"CpCp13_RS03930"	85542	0.1115621100738135
2.238162878787879	3.513267757991903E-4	0.4467950074042733	0.34194053208137715	76	4	false	"CpCp13_RS05260"	19	191.09722222222223	0	76	4	0.997365610896196	false	0	"CpCp13_RS08330"	180730	0.12384784330668971
2.6150568181818183	4.699126079666339E-4	0.3824008690928843	0.36835016835016837	83	4	false	"CpCp13_RS06190"	19	76.16363636363636	0	83	28	0.9965637088974855	false	0	"CpCp13_RS02935"	75690	0.10034734698766319
2.481060606060606	8.43942530099722E-5	0.4030534351145038	0.3768472906403941	29	4	false	"CpCp13_RS07585"	19	136.41379310344828	0	29	0	0.9968488072211477	false	0	"CpCp13_RS03540"	24986	0.12642612891885846
2.674715909090909	7.123871531306027E-5	0.37387148167817313	0.45092460881934565	45	4	false	"CpCp13_RS10885"	19	96.73684210526316	0	45	7	0.9964367746615086	false	0	"CpCp13_RS00565"	16392	0.1435264719662658
2.6429924242424243	2.6031054774926595E-4	0.37835901110713005	0.27384615384615385	32	4	false	"CpCp13_RS02405"	19	61.34615384615385	0	32	6	0.9965042714377821	false	0	"CpCp13_RS07310"	31820	0.08392086709460171
2.418087121212121	4.836564486536689E-5	0.41355002937145097	0.4594594594594595	38	4	false	"CpCp13_RS08585"	19	205.71052631578948	0	38	0	0.9969827933591231	false	0	"CpCp13_RS08560"	25594	0.16958823274178852
2.5667613636363638	1.263518803913E-4	0.38959601549529604	0.4024822695035461	64	4	false	"CpCp13_RS04575"	19	98.54166666666667	0	64	16	0.9966664651837523	false	0	"CpCp13_RS07440"	37882	0.11249048706240487
2.528409090909091	0.001028247891049069	0.3955056179775281	0.3595135023706452	121	4	false	"CpCp13_RS05305"	19	92.8080808080808	0	121	22	0.9967480657640233	false	0	"CpCp13_RS08255"	189286	0.10323479511466163
2.599905303030303	2.1197009332476541E-4	0.38462939355308684	0.4116059379217274	39	4	false	"CpCp13_RS00495"	19	97.07692307692308	0	39	0	0.9965959461637653	false	0	"CpCp13_RS05505"	48738	0.11940580944270981
2.6571969696969697	3.4727328966896773E-4	0.37633642195295797	0.31225296442687744	23	4	false	"CpCp13_RS06565"	19	68.43478260869566	0	23	0	0.9964740490006447	false	0	"CpCp13_RS00040"	48116	0.0943928035982009
2.4322916666666665	0.001096713374597789	0.411134903640257	0.24924379915305506	74	3	false	"CpCp13_RS04450"	19	81.12068965517241	0	74	16	0.9969525709219857	false	0	"CpCp13_RS10670"	149828	0.07109613466710991
2.3451704545454546	5.639736595215279E-5	0.42640823743185946	0.4539969834087481	52	4	false	"CpCp13_RS04670"	19	243.6153846153846	0	52	0	0.9971379352030948	false	0	"CpCp13_RS06985"	36110	0.18221045969737068
2.363162878787879	5.380096573573465E-4	0.42316169104387896	0.32337565347274083	132	4	false	"CpCp13_RS07390"	19	105.65384615384616	0	132	28	0.9970996534493874	false	0	"CpCp13_RS03055"	161628	0.08506750898055246
2.440814393939394	5.2356836574812725E-5	0.40969932104752665	0.4959349593495935	42	4	false	"CpCp13_RS01975"	19	207.4047619047619	0	42	0	0.9969344374597034	false	0	"CpCp13_RS03815"	30162	0.1805089311616727
2.5606060606060606	0.001947817055345585	0.3905325443786982	0.2068654019873532	104	4	false	"CpCp13_RS07085"	19	56.19512195121951	0	104	22	0.9966795615731786	false	0	"CpCp13_RS07485"	254336	0.06626783248964566
2.305397727272727	1.298056086956916E-4	0.43376463339494764	0.39751552795031053	71	4	false	"CpCp13_RS09650"	19	218.61428571428573	0	71	1	0.9972225580270793	false	0	"CpCp13_RS07975"	68426	0.1561530612244898
2.649621212121212	2.123270636680285E-4	0.37741243745532527	0.3606060606060606	58	4	false	"CpCp13_RS00520"	19	76.97777777777777	0	58	13	0.9964901676337847	false	0	"CpCp13_RS10435"	34174	0.10887945937450888
2.6306818181818183	5.457072578413165E-4	0.38012958963282933	0.2453551912568306	72	4	false	"CpCp13_RS07210"	2	63.67213114754098	0	72	11	0.9965304642166345	false	0	"CpCp13_RS01125"	70214	0.08792228964767684
2.818655303030303	1.5176909048282164E-5	0.35477910297329074	0.6095238095238096	22	4	false	"CpCp13_RS02810"	2	88.85714285714286	0	22	1	0.9961305206318504	false	0	"CpCp13_RS05200"	3210	0.18208430913348947
2.462121212121212	1.7533283161184112E-4	0.4061538461538462	0.41133004926108374	29	4	false	"CpCp13_RS00675"	2	161.6551724137931	0	29	0	0.9968891038039974	false	0	"CpCp13_RS08905"	35680	0.1447226252585435
2.424715909090909	8.177212328311632E-4	0.4124194493263034	0.24627450980392157	63	4	false	"CpCp13_RS07400"	2	87.7843137254902	0	63	12	0.9969686895551256	false	0	"CpCp13_RS00960"	112262	0.07522220542030009
2.367897727272727	8.174497190948131E-4	0.4223155368926215	0.24817927170868348	152	4	false	"CpCp13_RS02220"	2	105.55	0	152	32	0.997089579303675	false	0	"CpCp13_RS01355"	165450	0.08644553644553644
2.6103219696969697	1.3349128366042356E-4	0.38309450389987304	0.49393939393939396	45	4	false	"CpCp13_RS08360"	2	121.0	0	45	0	0.9965737830431979	false	0	"CpCp13_RS01050"	35296	0.1529709228824273
2.359848484848485	5.266440254631231E-5	0.42375601926163725	0.4064230343300111	43	4	false	"CpCp13_RS04050"	2	213.65116279069767	0	43	0	0.9971067053513861	false	0	"CpCp13_RS04435"	35522	0.16112455715738888
2.321969696969697	2.9994976466130117E-4	0.4306688417618271	0.41116231438812084	63	4	false	"CpCp13_RS05715"	2	158.12698412698413	0	63	0	0.9971872985170858	false	0	"CpCp13_RS10145"	130316	0.11533696872865364
2.347064393939394	5.650099366686925E-4	0.42606415170466005	0.30015082956259426	52	4	false	"CpCp13_RS03980"	2	107.36538461538461	0	52	0	0.9971339055448099	false	0	"CpCp13_RS08440"	133176	0.0808474281742354
2.2457386363636362	0.00396287247967388	0.4452877925363694	0.22142084385142444	291	3	false	"CpCp13_RS10545"	2	104.7457627118644	0	291	55	0.9973494922630561	false	0	"CpCp13_RS06855"	868590	0.07718921349437319
2.421401515151515	6.902044284385604E-4	0.41298396558466954	0.23268112109994712	67	4	false	"CpCp13_RS10085"	2	106.96774193548387	0	67	5	0.9969757414571244	false	0	"CpCp13_RS06030"	116736	0.09172522547446467
2.434659090909091	3.643759774977985E-4	0.4107351225204201	0.31637372802960223	61	4	false	"CpCp13_RS08190"	2	90.29787234042553	0	61	14	0.9969475338491296	false	0	"CpCp13_RS01655"	73592	0.07858822658000482
2.164299242424242	0.004739127649418393	0.4620433165609276	0.12672858617131064	196	4	false	"CpCp13_RS09025"	2	91.05847953216374	0	196	25	0.9975227675693101	false	0	"CpCp13_RS08645"	812740	0.05708995581953839
2.242897727272727	4.174330181737716E-4	0.4458518049398354	0.429320987654321	89	4	false	"CpCp13_RS10550"	2	186.50617283950618	0	89	8	0.9973555367504835	false	0	"CpCp13_RS07315"	230798	0.12254019240440615
2.6666666666666665	2.6471720223284064E-4	0.375	0.36134453781512604	47	4	false	"CpCp13_RS00235"	2	56.22857142857143	0	47	12	0.9964539007092198	false	0	"CpCp13_RS09890"	36274	0.08125516102394716
2.4857954545454546	7.66351629650033E-4	0.4022857142857143	0.1872816212438854	62	4	false	"CpCp13_RS09845"	2	75.44444444444444	0	62	8	0.9968387330754352	false	0	"CpCp13_RS09825"	112236	0.07198897370653096
2.433712121212121	1.0676693072107451E-4	0.4108949416342413	0.3412698412698413	28	4	false	"CpCp13_RS03145"	2	150.57142857142858	0	28	0	0.9969495486782721	false	0	"CpCp13_RS01705"	29758	0.12836438923395446
2.383049242424242	3.613972764819278E-4	0.4196304391019273	0.3298076923076923	65	3	false	"CpCp13_RS07695"	2	139.46153846153845	0	65	0	0.9970573420373953	false	0	"CpCp13_RS08785"	114672	0.11265067727103269
2.356060606060606	2.7235025811730735E-4	0.4244372990353698	0.28903654485049834	45	4	false	"CpCp13_RS04515"	2	142.3953488372093	0	45	2	0.9971147646679561	false	0	"CpCp13_RS10440"	79922	0.10754935712780159
2.4976325757575757	6.56062221816819E-5	0.4003791469194313	0.4599326599326599	61	4	false	"CpCp13_RS04495"	2	128.8	0	61	6	0.9968135477111542	false	0	"CpCp13_RS05720"	22418	0.12565853658536585
2.144412878787879	0.00480931828617227	0.4663281077500552	0.19246356203341627	325	3	false	"CpCp13_RS07465"	2	120.07903780068729	0	325	34	0.9975650789813024	false	0	"CpCp13_RS07755"	1133768	0.07920780857565124
2.363162878787879	3.239020622815137E-5	0.42316169104387896	0.4949201741654572	53	4	false	"CpCp13_RS01205"	2	216.58490566037736	0	53	0	0.9970996534493874	false	0	"CpCp13_RS04930"	23204	0.16596544495048074
2.4701704545454546	1.3289036003755937E-4	0.4048303622771708	0.5325051759834368	72	3	false	"CpCp13_RS07645"	2	150.68571428571428	0	72	2	0.9968719777562863	false	0	"CpCp13_RS07480"	63968	0.14364701075854555
2.339962121212121	7.08710952778211E-4	0.42735734520437074	0.19835164835164834	117	4	false	"CpCp13_RS00915"	2	97.11428571428571	0	117	12	0.9971490167633784	false	0	"CpCp13_RS09065"	155358	0.07504967984102451
2.237215909090909	0.0032866363098333793	0.446984126984127	0.19515205925260914	178	3	false	"CpCp13_RS02365"	2	90.8955223880597	0	178	44	0.9973676257253384	false	0	"CpCp13_RS01465"	577122	0.0615406380420174
2.664299242424242	1.6587090701859915E-4	0.37533321485693977	0.3843843843843844	44	4	false	"CpCp13_RS00310"	2	78.70270270270271	0	44	7	0.9964589377820761	false	0	"CpCp13_RS10285"	26936	0.11406188797493146
2.3428030303030303	1.9434875547260941E-4	0.42683912691996767	0.3734658094681473	59	4	false	"CpCp13_RS04665"	2	211.22033898305085	0	59	0	0.9971429722759511	false	0	"CpCp13_RS00475"	96296	0.1584548679542767
2.515625	3.1431154732214004E-4	0.39751552795031053	0.4474025974025974	65	4	false	"CpCp13_RS03755"	2	103.10714285714286	0	65	9	0.9967752659574468	false	0	"CpCp13_RS08290"	62934	0.10618655289098132
2.507102272727273	7.024063292258921E-5	0.3988668555240793	0.4045584045584046	27	4	false	"CpCp13_RS03720"	2	114.88888888888889	0	27	0	0.9967933994197292	false	0	"CpCp13_RS08355"	19908	0.11197747455057397
2.2476325757575757	4.6970109549130393E-4	0.4449125763640194	0.37183098591549296	71	3	false	"CpCp13_RS09165"	2	146.33802816901408	0	71	0	0.9973454626047712	false	0	"CpCp13_RS03935"	172208	0.09640186308894208
2.3536931818181817	0.0012012166265763732	0.42486421243210626	0.2277432712215321	94	4	false	"CpCp13_RS01885"	2	74.87142857142857	0	94	24	0.9971198017408124	false	0	"CpCp13_RS04705"	182696	0.05777116402116402
2.3077651515151514	2.3865385062443083E-4	0.4333196553139106	0.41368421052631577	76	4	false	"CpCp13_RS07535"	2	178.55263157894737	0	76	0	0.9972175209542231	false	0	"CpCp13_RS06865"	126824	0.12864022448050963
2.627840909090909	0.0014121550770459705	0.38054054054054054	0.1893780573025856	70	4	false	"CpCp13_RS09725"	2	43.27777777777778	0	70	16	0.9965365087040619	false	0	"CpCp13_RS02495"	151858	0.058801328502415456
2.684659090909091	3.830778141415696E-4	0.3724867724867725	0.20948616600790515	30	4	false	"CpCp13_RS05880"	2	49.608695652173914	0	30	7	0.9964156189555127	false	0	"CpCp13_RS07730"	53310	0.07648953301127215
2.4199810606060606	0.0015541664830959789	0.41322637448640187	0.25846242111302353	130	3	false	"CpCp13_RS01030"	2	69.01190476190476	0	130	46	0.9969787637008382	false	0	"CpCp13_RS09790"	233950	0.0604837026835274
2.4199810606060606	0.003477022829612897	0.41322637448640187	0.21172304538253658	191	3	false	"CpCp13_RS06365"	20	78.87074829931973	0	191	44	0.9969787637008382	false	0	"CpCp13_RS04615"	533332	0.07316395946133555
2.3134469696969697	0.0021383993290213696	0.4322554236594351	0.18926038500506587	167	3	false	"CpCp13_RS08125"	20	90.56737588652483	0	167	26	0.9972054319793681	false	0	"CpCp13_RS05750"	420958	0.06918821687282263
2.304924242424242	8.744859321382726E-5	0.4338537387017256	0.4491525423728814	60	4	false	"CpCp13_RS07835"	20	237.51666666666668	0	60	0	0.9972235654416506	false	0	"CpCp13_RS05510"	58224	0.1678563015312132
2.293087121212121	1.0857236554882785E-4	0.4360933305802189	0.3617664851784634	58	4	false	"CpCp13_RS01500"	20	213.8448275862069	0	58	0	0.9972487508059317	false	0	"CpCp13_RS01935"	65188	0.14829738390166913
2.3101325757575757	0.001957325838604502	0.4328755892600943	0.20031987205117952	142	4	false	"CpCp13_RS04430"	20	110.14634146341463	0	142	19	0.9972124838813669	false	0	"CpCp13_RS05355"	334594	0.08244486636483131
2.0890151515151514	0.006932911454631503	0.47869446962828655	0.13432601880877743	359	4	false	"CpCp13_RS01195"	20	99.8875	0	359	39	0.997682946486138	false	0	"CpCp13_RS02220"	1738110	0.06219645080946451
2.382102272727273	8.985004355841179E-5	0.4197972570065593	0.4440411373260738	59	4	false	"CpCp13_RS04650"	20	213.74137931034483	0	59	1	0.9970593568665378	false	0	"CpCp13_RS05835"	48228	0.16977075401933664
2.387784090909091	5.5557264808721836E-5	0.4187983343248067	0.4727657324167107	62	4	false	"CpCp13_RS04390"	20	212.91935483870967	0	62	0	0.9970472678916829	false	0	"CpCp13_RS07460"	31238	0.17101956211944552
2.2921401515151514	9.856106438601798E-4	0.43627349721132	0.2943722943722944	103	4	false	"CpCp13_RS08890"	20	129.06410256410257	0	103	25	0.9972507656350742	false	0	"CpCp13_RS01485"	230354	0.09095426537287002
2.633996212121212	2.323565548051359E-4	0.3796512673018156	0.35384615384615387	35	4	false	"CpCp13_RS07240"	20	65.6923076923077	0	35	9	0.9965234123146358	false	0	"CpCp13_RS09440"	32882	0.0872407804678721
2.272253787878788	1.0755127466711888E-4	0.4400916857678683	0.40512820512820513	66	4	false	"CpCp13_RS03760"	20	228.36363636363637	0	66	0	0.9972930770470664	false	0	"CpCp13_RS07620"	75774	0.1547179108154718
2.303030303030303	6.336045621488822E-5	0.43421052631578944	0.44476914085330216	59	4	false	"CpCp13_RS08645"	20	237.77966101694915	0	59	0	0.9972275950999355	false	0	"CpCp13_RS04750"	43050	0.16733262562769116
2.3584280303030303	2.0950944851703287E-4	0.4240112427223449	0.30793650793650795	36	4	false	"CpCp13_RS01465"	20	153.77777777777777	0	36	0	0.9971097275951	false	0	"CpCp13_RS07855"	66380	0.11579651941097724
2.820549242424242	8.571840312220524E-5	0.35454087628000674	0.21212121212121213	12	4	false	"CpCp13_RS04615"	20	51.416666666666664	0	12	0	0.9961264909735654	false	0	"CpCp13_RS08170"	8778	0.12520325203252033
2.8257575757575757	2.0972825369320675E-4	0.353887399463807	0.21568627450980393	24	4	false	"CpCp13_RS04115"	20	42.94444444444444	0	24	6	0.9961154094132818	false	0	"CpCp13_RS07045"	19698	0.10656189688447754
2.4109848484848486	8.202838851196179E-4	0.4147682639434407	0.40110558319513545	184	3	false	"CpCp13_RS07545"	20	113.17037037037036	0	184	49	0.9969979045776918	false	0	"CpCp13_RS04115"	245026	0.10204722305714191
2.464962121212121	1.3536461359624043E-4	0.4056857472147522	0.4912568306010929	61	4	false	"CpCp13_RS06100"	20	155.01639344262296	0	61	0	0.99688305931657	false	0	"CpCp13_RS05490"	52412	0.1447398631583781
2.4071969696969697	5.295576957428859E-5	0.4154209284028324	0.5467571644042232	52	4	false	"CpCp13_RS07700"	20	223.76923076923077	0	52	0	0.9970059638942617	false	0	"CpCp13_RS06200"	26872	0.1837185802703044
2.116950757575758	0.005774682864288379	0.4723775441735629	0.16853754940711463	321	3	false	"CpCp13_RS02760"	20	102.0	0	321	45	0.9976235090264346	false	0	"CpCp13_RS04895"	1514024	0.06419131529263687
2.3328598484848486	4.428527399300993E-4	0.42865841282727823	0.3455098934550989	96	4	false	"CpCp13_RS03615"	20	97.97260273972603	0	96	23	0.9971641279819471	false	0	"CpCp13_RS09830"	124520	0.07322317095644695
2.2869318181818183	0.0011037421594175954	0.4372670807453416	0.28317373461012313	130	3	false	"CpCp13_RS05220"	20	95.38372093023256	0	130	44	0.9972618471953578	false	0	"CpCp13_RS02425"	240138	0.06717163445791025
2.425662878787879	7.755702677448042E-5	0.4122584423189537	0.49744897959183676	49	4	false	"CpCp13_RS00470"	20	202.53061224489795	0	49	0	0.9969666747259832	false	0	"CpCp13_RS01315"	35330	0.17134569563866156
2.6259469696969697	1.9795230095222534E-4	0.38081500180310135	0.3634920634920635	43	4	false	"CpCp13_RS08575"	20	93.47222222222223	0	43	7	0.9965405383623468	false	0	"CpCp13_RS06715"	34250	0.12266695829687956
2.3115530303030303	6.089497140519186E-5	0.43260958623514956	0.4577572964669739	68	4	false	"CpCp13_RS09795"	20	217.6031746031746	0	68	5	0.9972094616376532	false	0	"CpCp13_RS09945"	43764	0.1550984851056127
2.2012310606060606	0.004509449779897907	0.4542912454291246	0.21272673955846005	262	3	false	"CpCp13_RS08590"	20	107.27853881278538	0	262	43	0.997444189232753	false	0	"CpCp13_RS05790"	1026932	0.07307802371443146
2.312973484848485	3.1272285110160524E-4	0.4323439099283521	0.3120775786071114	88	4	false	"CpCp13_RS10390"	20	144.53012048192772	0	88	5	0.9972064393939394	false	0	"CpCp13_RS05725"	113558	0.10511281489594743
2.7443181818181817	1.5079414610064929E-4	0.3643892339544514	0.4	25	4	false	"CpCp13_RS10685"	20	74.32	0	25	0	0.9962886847195358	false	0	"CpCp13_RS04985"	15918	0.13130742049469965
2.5321969696969697	0.001225873785176899	0.3949139865370232	0.27868343424934017	144	4	false	"CpCp13_RS08370"	20	87.97368421052632	0	144	30	0.9967400064474532	false	0	"CpCp13_RS05975"	223078	0.1000838273157296
2.511837121212121	2.595512303196973E-4	0.39811498586239397	0.3125	32	4	false	"CpCp13_RS10430"	20	100.90625	0	32	0	0.9967833252740168	false	0	"CpCp13_RS00955"	40824	0.10090625
2.6510416666666665	4.9687790986423604E-5	0.37721021611001965	0.4492307692307692	26	4	false	"CpCp13_RS00805"	20	121.42307692307692	0	26	0	0.9964871453900709	false	0	"CpCp13_RS02435"	11756	0.160825267447784
2.3645833333333335	0.0014779457537522018	0.4229074889867841	0.222665883734586	150	4	false	"CpCp13_RS04345"	20	93.02290076335878	0	150	19	0.9970966312056738	false	0	"CpCp13_RS03580"	328012	0.07675156828659965
2.4588068181818183	3.438304440170287E-4	0.4067013287117273	0.3596638655462185	35	4	false	"CpCp13_RS09970"	20	130.57142857142858	0	35	0	0.9968961557059961	false	0	"CpCp13_RS06730"	63264	0.11752603831811753
2.4512310606060606	0.0010022318187407479	0.4079582769943983	0.23076923076923078	75	3	false	"CpCp13_RS08870"	20	78.75471698113208	0	75	22	0.996912274339136	false	0	"CpCp13_RS04380"	143058	0.07120679654713569
2.398674242424242	1.120394694994205E-4	0.4168969601263324	0.3883357041251778	45	4	false	"CpCp13_RS03455"	20	154.05263157894737	0	45	7	0.9970240973565442	false	0	"CpCp13_RS09070"	32448	0.12453729311151768
2.3579545454545454	1.1226455027337624E-4	0.42409638554216866	0.42983682983682986	76	4	false	"CpCp13_RS00065"	20	184.46969696969697	0	76	10	0.9971107350096712	false	0	"CpCp13_RS10595"	46320	0.1413560896319517
2.515151515151515	6.707808962577385E-4	0.39759036144578314	0.2057142857142857	57	4	false	"CpCp13_RS08475"	20	69.18	0	57	7	0.9967762733720181	false	0	"CpCp13_RS03065"	96432	0.06973790322580645
2.2329545454545454	0.0011417758752037752	0.44783715012722647	0.24835803545480964	228	4	false	"CpCp13_RS08200"	20	139.0483870967742	0	228	42	0.9973766924564796	false	0	"CpCp13_RS05140"	338780	0.09683035313145835
2.656723484848485	6.414191481141667E-4	0.376403493138478	0.24541062801932367	62	4	false	"CpCp13_RS09605"	20	52.369565217391305	0	62	16	0.9964750564152159	false	0	"CpCp13_RS02120"	68802	0.0767882187938289
2.559185606060606	3.8288855007597897E-4	0.3907493061979649	0.3882978723404255	71	4	false	"CpCp13_RS03080"	20	97.89583333333333	0	71	23	0.9966825838168923	false	0	"CpCp13_RS08155"	61856	0.11049191121143717
2.537405303030303	8.387761563052079E-4	0.39410337749580143	0.2796396396396396	97	4	false	"CpCp13_RS02990"	20	81.98666666666666	0	97	22	0.9967289248871696	false	0	"CpCp13_RS06790"	130568	0.09079365079365079
2.5170454545454546	1.9225759698167762E-4	0.3972911963882618	0.45481670929241264	85	4	false	"CpCp13_RS00290"	20	131.6231884057971	0	85	16	0.9967722437137331	false	0	"CpCp13_RS00410"	60670	0.13782532817360954
2.331912878787879	7.029631443416908E-5	0.4288324873096446	0.4384825700615174	77	4	false	"CpCp13_RS04550"	20	223.0	0	77	0	0.9971661428110896	false	0	"CpCp13_RS02745"	48650	0.1657992565055762
2.6363636363636362	2.2478030349380054E-4	0.37931034482758624	0.3165322580645161	43	3	false	"CpCp13_RS00175"	20	62.09375	0	43	11	0.9965183752417796	false	0	"CpCp13_RS00135"	33410	0.08436650815217392
2.5639204545454546	4.1277647503034726E-4	0.39002770083102495	0.3078231292517007	60	4	false	"CpCp13_RS00765"	20	68.61224489795919	0	60	11	0.9966725096711799	false	0	"CpCp13_RS09660"	65774	0.07841399416909621
2.362689393939394	3.641842370765628E-5	0.42324649298597194	0.4882032667876588	58	4	false	"CpCp13_RS06175"	20	250.58620689655172	0	58	0	0.9971006608639588	false	0	"CpCp13_RS01490"	27546	0.19320447717544467
2.2206439393939394	3.4227573644076537E-4	0.45031982942430704	0.337888198757764	70	4	false	"CpCp13_RS02965"	20	216.0	0	70	0	0.997402885235332	false	0	"CpCp13_RS06800"	188484	0.13688212927756654
2.433712121212121	1.757670986842191E-4	0.4108949416342413	0.38095238095238093	36	4	false	"CpCp13_RS03335"	20	143.77777777777777	0	36	0	0.9969495486782721	false	0	"CpCp13_RS01325"	51622	0.12330855727082142
2.288825757575758	1.5974634839295866E-4	0.4369052544476624	0.4084124830393487	67	4	false	"CpCp13_RS10020"	20	219.07462686567163	0	67	0	0.9972578175370729	false	0	"CpCp13_RS08275"	81542	0.15192415177924523
2.633522727272727	1.683664725882251E-4	0.37971952535059333	0.4031746031746032	46	4	false	"CpCp13_RS00605"	20	105.47222222222223	0	46	10	0.9965244197292069	false	0	"CpCp13_RS08075"	33220	0.13697691197691197
2.3125	1.0253489896904645E-4	0.43243243243243246	0.40281377267678636	79	4	false	"CpCp13_RS10125"	20	187.1891891891892	0	79	5	0.9972074468085106	false	0	"CpCp13_RS07610"	49944	0.13495976149184513
2.2959280303030303	1.0734151791382191E-4	0.4355537224169932	0.4346076458752515	73	4	false	"CpCp13_RS01895"	20	226.4788732394366	0	73	2	0.9972427063185042	false	0	"CpCp13_RS07345"	61044	0.15937992486941352
2.6363636363636362	1.4982451958689416E-4	0.37931034482758624	0.3701149425287356	36	4	false	"CpCp13_RS07215"	20	71.3	0	36	6	0.9965183752417796	false	0	"CpCp13_RS10310"	26378	0.09557640750670242
2.4540719696969697	9.367756425596979E-4	0.40748601196218404	0.23496762257169287	71	4	false	"CpCp13_RS06210"	20	78.85106382978724	0	71	24	0.9969062298517085	false	0	"CpCp13_RS01405"	119808	0.07097305475228374
2.300189393939394	0.002775868798175114	0.43474680938657884	0.15124521072796934	164	4	false	"CpCp13_RS00550"	20	85.86206896551724	0	164	19	0.997233639587363	false	0	"CpCp13_RS05780"	392392	0.06436436953936825
2.5800189393939394	4.7498278579617963E-4	0.3875940539548541	0.32474849094567404	102	4	false	"CpCp13_RS07595"	20	80.01408450704226	0	102	31	0.9966382575757575	false	0	"CpCp13_RS03655"	87732	0.09769729488039347
2.3759469696969697	2.880848713692006E-4	0.42088481466719807	0.4266510812390415	62	4	false	"CpCp13_RS02625"	20	147.42372881355934	0	62	3	0.9970724532559638	false	0	"CpCp13_RS03890"	98794	0.11691017352383769
2.243844696969697	0.0041542738612274305	0.44566364211859044	0.16556603773584905	191	3	false	"CpCp13_RS03075"	20	87.9875	0	191	31	0.9973535219213411	false	0	"CpCp13_RS07545"	746392	0.06122999304105776
2.5355113636363638	3.3058286312183605E-4	0.39439775910364144	0.3425287356321839	40	4	false	"CpCp13_RS03000"	20	93.7	0	40	10	0.9967329545454545	false	0	"CpCp13_RS05195"	43948	0.09770594369134515
2.3167613636363638	2.1964361950696894E-4	0.4316370324954016	0.37945492662473795	58	4	false	"CpCp13_RS02255"	20	183.6851851851852	0	58	4	0.9971983800773694	false	0	"CpCp13_RS06765"	87624	0.13195774797786292
2.5601325757575757	5.392601250474665E-4	0.3906047715923803	0.31097560975609756	50	4	false	"CpCp13_RS00795"	20	63.73170731707317	0	50	9	0.9966805689877498	false	0	"CpCp13_RS04620"	66970	0.0708917767709379
2.234375	0.002625626297533512	0.44755244755244755	0.22270367862784923	254	4	false	"CpCp13_RS07340"	20	108.00947867298578	0	254	43	0.9973736702127659	false	0	"CpCp13_RS05060"	675942	0.07676579863040922
2.268939393939394	0.0015177840181882134	0.4407345575959933	0.21765392619663976	244	3	false	"CpCp13_RS10255"	20	107.8140703517588	0	244	45	0.9973001289490652	false	0	"CpCp13_RS03645"	337426	0.08015916011283182
2.5795454545454546	4.029884551667767E-4	0.3876651982378855	0.42994350282485877	83	4	false	"CpCp13_RS00570"	20	101.91666666666667	0	83	23	0.9966392649903288	false	0	"CpCp13_RS05380"	83294	0.12089758797943852
2.2793560606060606	1.890393682982697E-4	0.4387203988367262	0.4014336917562724	63	4	false	"CpCp13_RS02340"	20	239.47619047619048	0	63	0	0.9972779658284977	false	0	"CpCp13_RS01380"	111056	0.16346497643425972
2.4228219696969697	1.358196459425835E-4	0.41274184092241545	0.4138775510204082	50	4	false	"CpCp13_RS02310"	20	168.32	0	50	0	0.9969727192134107	false	0	"CpCp13_RS07655"	57692	0.14300764655904843
2.4086174242424243	1.9585587629579373E-4	0.4151759386671909	0.45193312434691746	112	4	false	"CpCp13_RS03565"	20	126.14772727272727	0	112	24	0.997002941650548	false	0	"CpCp13_RS03670"	83360	0.10846752130071133
2.3546401515151514	7.076081415929917E-4	0.42469334405791276	0.28421052631578947	105	4	false	"CpCp13_RS10260"	20	96.52631578947368	0	105	29	0.99711778691167	false	0	"CpCp13_RS00665"	149654	0.0748266013871889
2.281723484848485	0.0020913943334424055	0.43826520024901433	0.16122984626921635	147	3	false	"CpCp13_RS09275"	20	85.8740157480315	0	147	20	0.9972729287556414	false	0	"CpCp13_RS06400"	355332	0.061779867444626976
2.597064393939394	3.8053096844939497E-4	0.38505013673655425	0.3508771929824561	68	4	false	"CpCp13_RS08215"	20	89.08771929824562	0	68	11	0.9966019906511928	false	0	"CpCp13_RS06820"	60920	0.11066797428353492
2.3300189393939394	5.218697633237085E-5	0.4291810607600081	0.46581972171808833	58	4	false	"CpCp13_RS06970"	21	236.08620689655172	0	58	0	0.9971701724693746	false	0	"CpCp13_RS03385"	38484	0.17283031251577724
2.668087121212121	1.4374699152369324E-4	0.3748003549245785	0.39015151515151514	39	4	false	"CpCp13_RS00725"	21	80.72727272727273	0	39	6	0.9964508784655061	false	0	"CpCp13_RS01285"	25224	0.11819512844403035
2.747159090909091	2.366999199840151E-4	0.3640124095139607	0.29523809523809524	19	4	false	"CpCp13_RS02855"	21	58.46666666666667	0	19	4	0.9962826402321083	false	0	"CpCp13_RS07005"	25750	0.10907960199004975
2.356060606060606	0.0013894898822298216	0.4244372990353698	0.310339123242349	205	3	false	"CpCp13_RS01815"	21	109.71153846153847	0	205	49	0.9971147646679561	false	0	"CpCp13_RS01575"	390192	0.09112254025044722
2.4204545454545454	5.098018107194219E-4	0.4131455399061033	0.3445134575569358	91	4	false	"CpCp13_RS05695"	21	115.64285714285714	0	91	21	0.9969777562862668	false	0	"CpCp13_RS00245"	95306	0.09977813385923825
2.893939393939394	7.32061076125679E-5	0.34554973821989526	0.4230769230769231	15	4	false	"CpCp13_RS00790"	21	44.53846153846154	0	15	2	0.9959703417150226	false	0	"CpCp13_RS00420"	5314	0.14025721912157244
2.753314393939394	5.737471997487615E-4	0.36319862424763544	0.1984126984126984	41	4	false	"CpCp13_RS00140"	21	40.357142857142854	0	41	13	0.9962695438426822	false	0	"CpCp13_RS05390"	46178	0.08000283446712018
2.319128787878788	8.368537932862943E-4	0.4311964066966108	0.27212199312714774	120	4	false	"CpCp13_RS04800"	21	120.82474226804123	0	120	23	0.9971933430045131	false	0	"CpCp13_RS09965"	186992	0.09003333999108885
2.2954545454545454	2.2359793861885231E-4	0.43564356435643564	0.35401707085760736	136	4	false	"CpCp13_RS04015"	21	166.63114754098362	0	136	14	0.9972437137330754	false	0	"CpCp13_RS05860"	86106	0.12145127371791808
2.461174242424242	6.082156590924339E-4	0.4063101192766449	0.38223878279770224	149	4	false	"CpCp13_RS07925"	21	108.45614035087719	0	149	35	0.99689111863314	false	0	"CpCp13_RS05210"	161742	0.10570773913340857
2.601799242424242	5.142636597604325E-4	0.38434940855323024	0.14789915966386555	46	4	false	"CpCp13_RS06920"	21	53.2	0	46	11	0.9965919165054803	false	0	"CpCp13_RS08295"	53176	0.0658062234794908
2.206439393939394	0.0015996494636738717	0.45321888412017164	0.23157538877620013	240	4	false	"CpCp13_RS03190"	21	127.86274509803921	0	240	36	0.9974331076724694	false	0	"CpCp13_RS09710"	412330	0.08680430760219907
2.711174242424242	1.9945731309165026E-4	0.368843870066364	0.37298387096774194	42	4	false	"CpCp13_RS10155"	21	71.28125	0	42	10	0.9963592037395229	false	0	"CpCp13_RS02380"	25490	0.12020446880269814
2.6917613636363638	4.584262800753474E-4	0.37150395778364115	0.23707664884135474	45	4	false	"CpCp13_RS09940"	21	51.55882352941177	0	45	11	0.9964005077369439	false	0	"CpCp13_RS08600"	43304	0.08145153796115602
2.5672348484848486	0.001229735711780141	0.38952416082626334	0.2261835184102864	77	4	false	"CpCp13_RS06910"	21	64.16949152542372	0	77	18	0.9966654577691811	false	0	"CpCp13_RS10035"	136882	0.07487688626070446
2.2447916666666665	0.0024394798408884917	0.4454756380510441	0.21469681397738952	169	3	false	"CpCp13_RS04310"	21	107.57142857142857	0	169	29	0.9973515070921986	false	0	"CpCp13_RS06100"	497220	0.07393225331369661
2.5615530303030303	1.086020862003744E-4	0.39038817005545284	0.3473684210526316	24	4	false	"CpCp13_RS04995"	21	116.55	0	24	4	0.9966775467440362	false	0	"CpCp13_RS05915"	22218	0.12491961414790997
2.250473484848485	0.004051577105752996	0.444350936250789	0.13763861709067188	166	3	false	"CpCp13_RS04275"	21	77.98639455782313	0	166	19	0.9973394181173436	false	0	"CpCp13_RS05460"	610286	0.05430807420461221
2.196496212121212	0.0016111796386639266	0.45527053244233673	0.22597553873034362	132	3	false	"CpCp13_RS01095"	21	106.56862745098039	0	132	30	0.9974542633784655	false	0	"CpCp13_RS00685"	366234	0.06681418648964288
2.6235795454545454	1.0514686191793568E-4	0.3811586356253384	0.4505928853754941	23	4	false	"CpCp13_RS07415"	21	114.82608695652173	0	23	0	0.9965455754352031	false	0	"CpCp13_RS03575"	17706	0.1474019088016967
2.2987689393939394	0.0014878156060761365	0.43501544799176106	0.1941418368083111	182	4	false	"CpCp13_RS04365"	21	102.52694610778443	0	182	15	0.9972366618310767	false	0	"CpCp13_RS07700"	304084	0.07773081585123914
2.4038825757575757	2.7262708322475245E-4	0.415993697065196	0.38917306052855927	69	4	false	"CpCp13_RS06115"	21	153.33333333333334	0	69	0	0.9970130157962604	false	0	"CpCp13_RS01255"	97206	0.12874335292471312
2.650094696969697	1.3209736151894157E-4	0.37734500625335005	0.3333333333333333	26	4	false	"CpCp13_RS03140"	21	71.16666666666667	0	26	8	0.9964891602192134	false	0	"CpCp13_RS00200"	16042	0.09722222222222222
2.3617424242424243	0.002007458890188775	0.4234161988773055	0.2194139194139194	125	3	false	"CpCp13_RS05580"	21	99.4952380952381	0	125	20	0.9971026756931012	false	0	"CpCp13_RS00270"	291794	0.08004443933647473
2.359848484848485	7.634214052074441E-5	0.42375601926163725	0.45387755102040817	50	4	false	"CpCp13_RS02510"	21	177.1	0	50	0	0.9971067053513861	false	0	"CpCp13_RS04140"	49158	0.13508771929824562
2.5989583333333335	1.1699858458906054E-4	0.3847695390781563	0.4919786096256685	34	4	false	"CpCp13_RS05405"	21	102.55882352941177	0	34	0	0.9965979609929079	false	0	"CpCp13_RS02820"	30222	0.12356484762579731
2.398200757575758	5.23087906354546E-5	0.4169792694965449	0.47205387205387206	55	4	false	"CpCp13_RS01365"	21	220.1090909090909	0	55	0	0.9970251047711154	false	0	"CpCp13_RS03325"	28576	0.17880511040543534
2.3139204545454546	3.4758709763767E-4	0.4321669736034377	0.3130618720253834	71	4	false	"CpCp13_RS10690"	21	141.33870967741936	0	71	9	0.997204424564797	false	0	"CpCp13_RS02015"	114188	0.10168252494778371
2.446496212121212	3.171283679576116E-5	0.4087478227211148	0.4657375145180023	42	4	false	"CpCp13_RS07185"	21	209.0952380952381	0	42	0	0.9969223484848485	false	0	"CpCp13_RS09140"	15418	0.18134886218147275
2.3167613636363638	8.98521774424242E-5	0.4316370324954016	0.3722478238607271	63	4	false	"CpCp13_RS02765"	21	207.25396825396825	0	63	0	0.9971983800773694	false	0	"CpCp13_RS00515"	52790	0.14931842093225378
2.362215909090909	1.3360916680119935E-4	0.42333132892363196	0.39477503628447025	53	4	false	"CpCp13_RS08245"	21	159.81132075471697	0	53	0	0.99710166827853	false	0	"CpCp13_RS05155"	63312	0.12293178519593614
2.3238636363636362	9.427278896389185E-5	0.430317848410758	0.3879492600422833	44	4	false	"CpCp13_RS05005"	21	173.77272727272728	0	44	0	0.9971832688588008	false	0	"CpCp13_RS03435"	51522	0.12537714810442083
2.3849431818181817	3.186093523426487E-5	0.41929720071471116	0.5158249158249159	55	4	false	"CpCp13_RS06555"	21	229.0909090909091	0	55	0	0.9970533123791102	false	0	"CpCp13_RS09315"	18928	0.18239722061378114
2.4791666666666665	1.83419112686362E-4	0.40336134453781514	0.38798076923076924	65	4	false	"CpCp13_RS03210"	21	145.47692307692307	0	65	0	0.9968528368794326	false	0	"CpCp13_RS01560"	66304	0.1390792763641712
2.4417613636363638	6.935392522130203E-4	0.40954043048283884	0.2698039215686274	64	4	false	"CpCp13_RS04675"	21	76.3529411764706	0	64	13	0.9969324226305609	false	0	"CpCp13_RS10275"	106400	0.06762882300838848
2.4834280303030303	7.403985956796753E-4	0.4026692087702574	0.29903846153846153	90	4	false	"CpCp13_RS06360"	21	78.16923076923077	0	90	25	0.9968437701482915	false	0	"CpCp13_RS00970"	132750	0.0761141487529024
2.3707386363636362	4.074654224110538E-5	0.42180946674655484	0.4695210449927431	53	4	false	"CpCp13_RS03950"	21	222.0566037735849	0	53	0	0.9970835348162476	false	0	"CpCp13_RS02060"	26928	0.1724041954763858
2.2949810606060606	0.0012615863810948058	0.4357334433670312	0.21886529759832926	192	4	false	"CpCp13_RS01245"	21	117.91764705882353	0	192	22	0.9972447211476467	false	0	"CpCp13_RS02760"	277746	0.0891964047343597
2.469223484848485	4.0406331138532456E-4	0.4049856184084372	0.32801161103047893	61	3	false	"CpCp13_RS08130"	21	103.18867924528301	0	61	8	0.9968739925854287	false	0	"CpCp13_RS05190"	88008	0.0966186135255459
2.664772727272727	6.523407728332842E-4	0.3752665245202559	0.2469545957918051	57	4	false	"CpCp13_RS04315"	21	44.25581395348837	0	57	14	0.9964579303675047	false	0	"CpCp13_RS10025"	64050	0.06625121849324607
2.363162878787879	9.965067557814526E-5	0.42316169104387896	0.4437456324248777	54	4	false	"CpCp13_RS04900"	21	219.77777777777777	0	54	0	0.9970996534493874	false	0	"CpCp13_RS09800"	51210	0.16867058923850942
2.515151515151515	7.987173179240266E-4	0.39759036144578314	0.34955050237969326	81	4	false	"CpCp13_RS02725"	21	89.30645161290323	0	81	19	0.9967762733720181	false	0	"CpCp13_RS06410"	116890	0.09264154731628965
2.605587121212121	1.5258673031213238E-4	0.38379065964019626	0.3994708994708995	40	4	false	"CpCp13_RS01625"	21	89.5	0	40	12	0.9965838571889104	false	0	"CpCp13_RS01105"	26702	0.10731414868105515
2.3418560606060606	4.038925426741024E-4	0.4270117266477962	0.3522012578616352	54	4	false	"CpCp13_RS06105"	21	173.14814814814815	0	54	0	0.9971449871050935	false	0	"CpCp13_RS02975"	108900	0.1294081824724575
2.3792613636363638	3.850296985961956E-4	0.42029850746268654	0.430140912347743	206	4	false	"CpCp13_RS01850"	21	130.8176100628931	0	206	47	0.9970654013539652	false	0	"CpCp13_RS02270"	167062	0.11336014736819158
2.6197916666666665	5.633069201327627E-4	0.38170974155069587	0.22995169082125605	63	4	false	"CpCp13_RS04655"	21	49.91304347826087	0	63	17	0.996553634751773	false	0	"CpCp13_RS03710"	61386	0.06573294380477746
2.2642045454545454	0.0016469846733283258	0.44165621079046424	0.2246702026383789	215	4	false	"CpCp13_RS05310"	21	110.07558139534883	0	215	43	0.9973102030947776	false	0	"CpCp13_RS05365"	461192	0.07959188821066437
2.2367424242424243	0.00312963887152817	0.4470787468247248	0.13748945633003604	193	3	false	"CpCp13_RS09525"	21	86.95061728395062	0	193	31	0.9973686331399098	false	0	"CpCp13_RS03615"	538784	0.0599659429544487
2.3177083333333335	1.5357830849011897E-4	0.4314606741573033	0.37682570593963	87	4	false	"CpCp13_RS10270"	21	172.16455696202533	0	87	8	0.997196365248227	false	0	"CpCp13_RS05000"	72254	0.1261278805582603
2.649621212121212	1.6092244355286867E-4	0.37741243745532527	0.36594202898550726	25	4	false	"CpCp13_RS05120"	21	87.04166666666667	0	25	1	0.9964901676337847	false	0	"CpCp13_RS04080"	29328	0.11858537693006357
2.550662878787879	0.0011966126146426368	0.392054947094858	0.1839332748024583	88	4	false	"CpCp13_RS02190"	21	50.5	0	88	20	0.9967007172791748	false	0	"CpCp13_RS03155"	165086	0.05706214689265537
2.471590909090909	7.893617203396742E-4	0.4045977011494253	0.26788990825688075	137	4	false	"CpCp13_RS07990"	21	100.13636363636364	0	137	27	0.9968689555125725	false	0	"CpCp13_RS00590"	162722	0.09914491449144915
2.4176136363636362	3.436177637123753E-4	0.41363102232667454	0.41821946169772256	70	4	false	"CpCp13_RS04535"	21	149.34285714285716	0	70	0	0.9969838007736944	false	0	"CpCp13_RS01445"	113266	0.12863295188876583
2.3792613636363638	1.0495966536564863E-4	0.42029850746268654	0.4355400696864111	42	4	false	"CpCp13_RS05980"	21	224.52380952380952	0	42	0	0.9970654013539652	false	0	"CpCp13_RS02165"	50784	0.1752722947102338
2.3925189393939394	9.756439523787584E-4	0.4179695230556105	0.283461210571185	90	4	false	"CpCp13_RS09640"	21	92.40579710144928	0	90	21	0.9970371937459703	false	0	"CpCp13_RS08315"	157588	0.07605415399296236
2.1363636363636362	0.0037852324068014098	0.46808510638297873	0.16541471974133	356	4	false	"CpCp13_RS03930"	21	109.25705329153605	0	356	37	0.9975822050290135	false	0	"CpCp13_RS08360"	905040	0.07249970357766161
2.4431818181818183	6.032121028984593E-4	0.40930232558139534	0.4846743295019157	162	4	false	"CpCp13_RS07440"	21	121.73504273504274	0	162	45	0.9969294003868472	false	0	"CpCp13_RS04105"	165034	0.11473613829881502
2.3233901515151514	0.0014933302551434916	0.4304055431016915	0.2817845177217422	133	4	false	"CpCp13_RS00960"	21	96.14953271028037	0	133	26	0.997184276273372	false	0	"CpCp13_RS00460"	284376	0.07256568506436255
2.396780303030303	0.0019531146708359323	0.41722639273014617	0.1965938541281007	100	4	false	"CpCp13_RS10145"	21	79.94594594594595	0	100	26	0.9970281270148291	false	0	"CpCp13_RS07025"	250466	0.06656614983009654
2.6661931818181817	2.8985419605414317E-4	0.3750665956313266	0.2905525846702317	45	4	false	"CpCp13_RS01655"	21	52.1764705882353	0	45	11	0.9964549081237911	false	0	"CpCp13_RS04560"	34786	0.07650508883905469
2.367897727272727	2.3797475403447238E-4	0.4223155368926215	0.34312354312354315	83	4	false	"CpCp13_RS09825"	21	119.1969696969697	0	83	17	0.997089579303675	false	0	"CpCp13_RS09610"	73364	0.09363469732676331
2.289772727272727	0.0020950046863299192	0.43672456575682383	0.19355206197311461	164	3	false	"CpCp13_RS08785"	21	91.55639097744361	0	164	31	0.9972558027079303	false	0	"CpCp13_RS04940"	414956	0.06697614555774953
2.331439393939394	0.0025423070402969656	0.4289195775792039	0.15296080066722267	128	3	false	"CpCp13_RS05720"	21	78.94545454545455	0	128	18	0.9971671502256609	false	0	"CpCp13_RS01475"	330250	0.06063398966624773
2.3323863636363638	0.001398287021671091	0.4287454323995128	0.23232323232323232	170	4	false	"CpCp13_RS08290"	21	99.6875	0	170	26	0.9971651353965183	false	0	"CpCp13_RS05220"	322922	0.07867995264404104
2.5828598484848486	2.5156917450536826E-4	0.38716773602199817	0.32386363636363635	33	4	false	"CpCp13_RS07460"	21	82.78787878787878	0	33	0	0.99663221308833	false	0	"CpCp13_RS05270"	45834	0.09705495754733738
2.659090909090909	5.551621673660862E-4	0.37606837606837606	0.21025641025641026	53	4	false	"CpCp13_RS07620"	21	46.05	0	53	13	0.9964700193423597	false	0	"CpCp13_RS05770"	53146	0.06752199413489736
2.2869318181818183	6.875787058265061E-4	0.4372670807453416	0.28065967016491755	140	4	false	"CpCp13_RS05490"	21	126.5603448275862	0	140	24	0.9972618471953578	false	0	"CpCp13_RS03585"	231136	0.09085451889991832
2.53125	2.8820270218129807E-4	0.3950617283950617	0.4658385093167702	94	4	false	"CpCp13_RS02120"	21	113.25714285714285	0	94	24	0.9967420212765957	false	0	"CpCp13_RS00350"	73112	0.12230792965134218
2.6202651515151514	2.3786638967179195E-4	0.3816407661727503	0.28774928774928776	27	4	false	"CpCp13_RS03890"	21	74.29629629629629	0	27	0	0.9965526273372018	false	0	"CpCp13_RS00690"	34140	0.09440444256200292
2.257102272727273	1.4313208669789498E-4	0.4430459408432976	0.35080363382250174	54	4	false	"CpCp13_RS01380"	21	194.61111111111111	0	54	0	0.9973253143133463	false	0	"CpCp13_RS03320"	89366	0.12820231298492168
2.617424242424242	2.6384611715270755E-4	0.38205499276411004	0.35306553911205074	53	4	false	"CpCp13_RS00515"	21	88.56818181818181	0	53	9	0.9965586718246292	false	0	"CpCp13_RS07745"	50730	0.11502361275088548
2.493371212121212	4.433452097132441E-4	0.40106342575009496	0.35486542443064184	89	4	false	"CpCp13_RS01560"	21	96.3	0	89	19	0.9968226144422954	false	0	"CpCp13_RS00225"	98902	0.09572564612326044
2.2514204545454546	2.8687656343815413E-4	0.44416403785488956	0.3581780538302277	70	4	false	"CpCp13_RS10275"	21	198.8	0	70	0	0.9973374032882012	false	0	"CpCp13_RS07515"	171112	0.13139458030403173
2.365530303030303	5.033658044800892E-4	0.42273819055244194	0.33580155497963715	98	4	false	"CpCp13_RS05190"	21	113.27027027027027	0	98	24	0.9970946163765313	false	0	"CpCp13_RS03445"	114650	0.08940037116832697
2.382102272727273	1.8764063400528334E-4	0.4197972570065593	0.3202959830866808	55	4	false	"CpCp13_RS03710"	21	128.52272727272728	0	55	11	0.9970593568665378	false	0	"CpCp13_RS09510"	55740	0.10151874192158553
2.976799242424242	3.6028137109945286E-5	0.3359312867822491	0.25	12	4	false	"CpCp13_RS09320"	21	41.333333333333336	0	12	3	0.9957940441650548	false	0	"CpCp13_RS02330"	3338	0.1804949053857351
2.4015151515151514	7.107829699819637E-5	0.416403785488959	0.47294117647058825	51	4	false	"CpCp13_RS04845"	21	191.1764705882353	0	51	0	0.9970180528691167	false	0	"CpCp13_RS06600"	32612	0.15517570664629488
2.400094696969697	5.129446431600571E-5	0.416650226869205	0.4909090909090909	56	4	false	"CpCp13_RS06260"	21	224.83928571428572	0	56	0	0.9970210751128304	false	0	"CpCp13_RS02505"	32078	0.18369222689075632
2.3106060606060606	1.7767307380182006E-4	0.43278688524590164	0.40382513661202185	61	4	false	"CpCp13_RS06470"	21	200.86885245901638	0	61	0	0.9972114764667956	false	0	"CpCp13_RS09320"	75542	0.14378586432284637
2.4266098484848486	1.713483470473188E-4	0.41209756097560973	0.43224043715846994	72	4	false	"CpCp13_RS03235"	21	151.62295081967213	0	72	11	0.9969646598968407	false	0	"CpCp13_RS01040"	65922	0.13116172216234614
2.678503787878788	4.442670394525204E-4	0.37334276118083787	0.3097251585623679	55	4	false	"CpCp13_RS06075"	21	54.86363636363637	0	55	11	0.9964287153449387	false	0	"CpCp13_RS09840"	56752	0.08545737751345228
2.3446969696969697	5.4407967796358986E-5	0.42649434571890144	0.42185792349726775	61	4	false	"CpCp13_RS09570"	21	218.91803278688525	0	61	0	0.997138942617666	false	0	"CpCp13_RS04845"	36210	0.1646000246517934
2.714962121212121	1.0108317389053857E-4	0.36832926403906524	0.31666666666666665	16	4	false	"CpCp13_RS07550"	21	62.9375	0	16	0	0.9963511444229529	false	0	"CpCp13_RS09475"	12572	0.103515625
2.590435606060606	0.001169839294608163	0.386035459696582	0.17731829573934837	71	3	false	"CpCp13_RS04565"	21	44.89473684210526	0	71	14	0.9966160944551902	false	0	"CpCp13_RS05130"	114852	0.0555627931214174
2.992424242424242	2.4989124937520847E-5	0.3341772151898734	0.42424242424242425	12	4	false	"CpCp13_RS06635"	21	40.583333333333336	0	12	0	0.9957607994842037	false	0	"CpCp13_RS08715"	2208	0.1604084321475626
2.662405303030303	9.608943067088286E-4	0.3756002134092121	0.22938775510204082	69	4	false	"CpCp13_RS05545"	21	45.2	0	69	19	0.996462967440361	false	0	"CpCp13_RS08160"	102076	0.06801204819277108
2.4862689393939394	3.0796673466449684E-4	0.4022091030279947	0.43676395289298514	76	4	false	"CpCp13_RS09040"	21	123.60317460317461	0	76	13	0.9968377256608639	false	0	"CpCp13_RS00405"	71522	0.12082421759841115
2.3016098484848486	2.1381772601600276E-4	0.43447850236576835	0.398595258999122	76	4	false	"CpCp13_RS05740"	21	163.7058823529412	0	76	8	0.9972306173436493	false	0	"CpCp13_RS07945"	98592	0.11585695849465051
2.2713068181818183	0.002219523249269394	0.440275171982489	0.26642747990166765	222	4	false	"CpCp13_RS01685"	21	111.01724137931035	0	222	48	0.9972950918762089	false	0	"CpCp13_RS00625"	528724	0.08121231995560377
2.7201704545454546	3.589280784739033E-4	0.36762402088772844	0.28717948717948716	63	4	false	"CpCp13_RS06000"	21	50.1	0	63	23	0.9963400628626693	false	0	"CpCp13_RS06260"	42246	0.08637931034482758
2.6231060606060606	7.38811511345044E-4	0.3812274368231047	0.24310595065312046	74	4	false	"CpCp13_RS05585"	21	51.9622641509434	0	74	21	0.9965465828497744	false	0	"CpCp13_RS01020"	97384	0.06882419092840185
2.5165719696969697	1.5199633665704634E-4	0.3973659454374412	0.47956989247311826	32	4	false	"CpCp13_RS01740"	21	123.2258064516129	0	32	1	0.9967732511283043	false	0	"CpCp13_RS01240"	37004	0.12310270374786504
2.210227272727273	0.0022873510743237143	0.4524421593830334	0.18344519015659955	174	3	false	"CpCp13_RS06870"	21	110.38666666666667	0	174	24	0.9974250483558995	false	0	"CpCp13_RS00470"	481672	0.07271848924022838
2.3106060606060606	0.0011435153032258983	0.43278688524590164	0.24413145539906103	175	4	false	"CpCp13_RS09810"	21	117.02112676056338	0	175	33	0.9972114764667956	false	0	"CpCp13_RS08575"	260928	0.08885431037248548
2.446496212121212	1.3011783645649805E-4	0.4087478227211148	0.43022774327122154	71	4	false	"CpCp13_RS06495"	21	144.95714285714286	0	71	1	0.9969223484848485	false	0	"CpCp13_RS01820"	60270	0.1310643244639628
2.163825757575758	0.0029007438199583867	0.462144420131291	0.18591051271589829	207	4	false	"CpCp13_RS06130"	21	109.69186046511628	0	207	35	0.9975237749838813	false	0	"CpCp13_RS01440"	742442	0.06877232631041773
2.580965909090909	7.422716713268244E-4	0.38745184369840396	0.2127659574468085	64	4	false	"CpCp13_RS01945"	21	56.916666666666664	0	64	16	0.996636242746615	false	0	"CpCp13_RS06470"	95398	0.06791964996022275
2.491950757575758	0.0017217866617557538	0.4012920387611628	0.17513513513513512	98	4	false	"CpCp13_RS00060"	21	60.85333333333333	0	98	23	0.996825636686009	false	0	"CpCp13_RS03830"	258104	0.060853333333333336
2.5331439393939394	5.678538478805094E-4	0.39476635514018693	0.32365003417634997	97	4	false	"CpCp13_RS07255"	21	97.87012987012987	0	97	20	0.9967379916183108	false	0	"CpCp13_RS07325"	108152	0.10707891670692546
2.7144886363636362	1.8454516956895546E-4	0.3683935112506541	0.3994708994708995	28	4	false	"CpCp13_RS06250"	21	63.75	0	28	0	0.9963521518375242	false	0	"CpCp13_RS08320"	25422	0.1091609589041096
2.252840909090909	2.2214917578691821E-4	0.4438839848675914	0.3587416817906836	58	4	false	"CpCp13_RS06455"	21	191.36206896551724	0	58	0	0.9973343810444874	false	0	"CpCp13_RS07985"	130924	0.12564810831616366
2.287878787878788	1.9454336935794287E-4	0.43708609271523174	0.367843137254902	51	4	false	"CpCp13_RS07845"	21	191.45098039215685	0	51	0	0.9972598323662153	false	0	"CpCp13_RS09780"	104938	0.13158142982278823
2.5568181818181817	1.2442623005789154E-4	0.39111111111111113	0.4729824561403509	96	4	false	"CpCp13_RS09775"	21	109.44736842105263	0	96	20	0.9966876208897485	false	0	"CpCp13_RS08210"	38748	0.1256571394041936
2.399621212121212	8.91429090714994E-5	0.4167324388318864	0.5	68	4	false	"CpCp13_RS03960"	21	174.703125	0	68	4	0.9970220825274018	false	0	"CpCp13_RS05675"	51048	0.14486162935323382
2.5771780303030303	9.544477562581832E-5	0.38802131177659377	0.46226415094339623	58	4	false	"CpCp13_RS09370"	21	138.0943396226415	0	58	5	0.9966443020631851	false	0	"CpCp13_RS05225"	32928	0.1617029737970041
2.3068181818181817	1.4287515175043255E-4	0.43349753694581283	0.3170731707317073	42	4	false	"CpCp13_RS05435"	21	166.5	0	42	0	0.9972195357833655	false	0	"CpCp13_RS06245"	61450	0.11667834618079888
2.1036931818181817	0.004232967567980344	0.4753544902093181	0.14823212543458245	415	4	false	"CpCp13_RS04250"	21	105.10732984293193	0	415	33	0.9976517166344294	false	0	"CpCp13_RS04050"	1035298	0.06946948436413215
2.4820075757575757	6.776797039856106E-5	0.40289965661961086	0.35960591133004927	29	4	false	"CpCp13_RS03410"	21	150.0344827586207	0	29	0	0.9968467923920051	false	0	"CpCp13_RS10520"	22642	0.13802620308980745
2.299715909090909	0.0012812547648951736	0.4348363187152563	0.22854617163062696	212	3	false	"CpCp13_RS02785"	21	107.18604651162791	0	212	40	0.9972346470019342	false	0	"CpCp13_RS07765"	305932	0.08200921691784843
2.3304924242424243	1.1159893859899337E-4	0.4290938642828119	0.40505050505050505	45	4	false	"CpCp13_RS07110"	21	184.84444444444443	0	45	0	0.9971691650548034	false	0	"CpCp13_RS00020"	44722	0.13462814599012704
2.4176136363636362	2.5630073833720756E-4	0.41363102232667454	0.3775241439859526	79	4	false	"CpCp13_RS02145"	21	122.19117647058823	0	79	11	0.9969838007736944	false	0	"CpCp13_RS10460"	81658	0.1048851300176723
2.559185606060606	1.288854252227563E-4	0.3907493061979649	0.4640088593576966	43	4	false	"CpCp13_RS05810"	21	152.72093023255815	0	43	0	0.9966825838168923	false	0	"CpCp13_RS04685"	33160	0.16745716034271727
2.289772727272727	9.08196871381461E-5	0.43672456575682383	0.46945575712699	74	4	false	"CpCp13_RS00655"	21	242.22972972972974	0	74	0	0.9972558027079303	false	0	"CpCp13_RS09335"	66418	0.16939141939141938
2.3896780303030303	7.554588704142517E-4	0.4184664156924906	0.34972677595628415	75	4	false	"CpCp13_RS00150"	21	132.40983606557376	0	75	14	0.9970432382333979	false	0	"CpCp13_RS10880"	107668	0.10772452613747016
2.237689393939394	4.932892341074981E-4	0.4468895471857808	0.32021857923497266	61	4	false	"CpCp13_RS03985"	21	163.672131147541	0	61	0	0.9973666183107673	false	0	"CpCp13_RS03235"	190674	0.10559492332099418
2.3233901515151514	2.936285844358238E-4	0.4304055431016915	0.4329763063940279	79	4	false	"CpCp13_RS09470"	21	151.34177215189874	0	79	0	0.997184276273372	false	0	"CpCp13_RS04700"	127744	0.11185644652764135
2.153409090909091	0.0031510648285251884	0.46437994722955145	0.17763845350052246	274	4	false	"CpCp13_RS05065"	21	108.78017241379311	0	274	42	0.9975459381044488	false	0	"CpCp13_RS00335"	708476	0.06982039307688903
2.5421401515151514	2.3579924244266582E-4	0.39336934252188493	0.3751412429378531	60	4	false	"CpCp13_RS07250"	21	122.66666666666667	0	60	0	0.9967188507414572	false	0	"CpCp13_RS03095"	67480	0.13406193078324227
2.597064393939394	6.931562022309566E-4	0.38505013673655425	0.2837662337662338	73	4	false	"CpCp13_RS06675"	21	58.839285714285715	0	73	17	0.9966019906511928	false	0	"CpCp13_RS01345"	105626	0.07364115859109602
2.394412878787879	4.7143200142751727E-4	0.4176389163535693	0.35733099209833186	89	3	false	"CpCp13_RS03270"	21	110.20588235294117	0	89	21	0.9970331640876854	false	0	"CpCp13_RS06890"	114004	0.09100403167047166
2.5454545454545454	2.576445740988191E-4	0.39285714285714285	0.28078817733990147	29	4	false	"CpCp13_RS09485"	22	99.48275862068965	0	29	0	0.9967117988394584	false	0	"CpCp13_RS02915"	43566	0.10572025358202938
2.3125	1.7000792227432184E-4	0.43243243243243246	0.41116231438812084	63	4	false	"CpCp13_RS08095"	22	212.77777777777777	0	63	0	0.9972074468085106	false	0	"CpCp13_RS06075"	81738	0.1527478663157055
2.381628787878788	9.286696398028122E-4	0.41988071570576535	0.255960729312763	109	4	false	"CpCp13_RS07865"	22	106.51612903225806	0	109	16	0.9970603642811089	false	0	"CpCp13_RS02045"	184582	0.08745166587213306
2.3768939393939394	0.001590825770792267	0.42071713147410356	0.20051483538815879	144	4	false	"CpCp13_RS07850"	22	88.40163934426229	0	144	22	0.9970704384268214	false	0	"CpCp13_RS04290"	274968	0.0739762672336923
2.34375	0.0021062715165583628	0.4266666666666667	0.33983739837398375	227	4	false	"CpCp13_RS00695"	22	104.97575757575757	0	227	62	0.9971409574468085	false	0	"CpCp13_RS07075"	502922	0.08590487526657739
2.278409090909091	4.331668002893565E-4	0.43890274314214467	0.2559322033898305	69	4	false	"CpCp13_RS02170"	22	121.55	0	69	9	0.9972799806576403	false	0	"CpCp13_RS08240"	114394	0.0829692832764505
2.5288825757575757	3.883597866986003E-4	0.39543156712226174	0.3333333333333333	30	4	false	"CpCp13_RS05640"	22	119.8	0	30	0	0.996747058349452	false	0	"CpCp13_RS04100"	66572	0.12309009934909215
2.3418560606060606	1.4529063633453944E-4	0.4270117266477962	0.4230263157894737	108	4	false	"CpCp13_RS00330"	22	182.70833333333334	0	108	12	0.9971449871050935	false	0	"CpCp13_RS10185"	64336	0.14086995630943203
2.339962121212121	6.298154850476441E-5	0.42735734520437074	0.4922558922558923	55	4	false	"CpCp13_RS04335"	22	233.1818181818182	0	55	0	0.9971490167633784	false	0	"CpCp13_RS06290"	40886	0.17324057814399568
2.4384469696969697	2.967024381484259E-4	0.41009708737864076	0.5401116661769028	107	4	false	"CpCp13_RS04725"	22	135.81927710843374	0	107	24	0.9969394745325596	false	0	"CpCp13_RS07090"	106894	0.1230247075257552
2.543087121212121	9.531799391456543E-5	0.3932228635263452	0.3645320197044335	32	4	false	"CpCp13_RS03945"	22	92.96551724137932	0	32	3	0.9967168359123146	false	0	"CpCp13_RS04660"	18870	0.0983762087210363
2.3759469696969697	3.343540374334774E-4	0.42088481466719807	0.40508474576271186	70	4	false	"CpCp13_RS02225"	22	150.01666666666668	0	70	10	0.9970724532559638	false	0	"CpCp13_RS06545"	78140	0.11887216059165347
2.284564393939394	0.001207396608330013	0.437720207253886	0.24248990446173543	166	4	false	"CpCp13_RS05140"	22	124.74825174825175	0	166	23	0.9972668842682141	false	0	"CpCp13_RS01115"	269152	0.0911236316641722
2.5137310606060606	2.3827205170434787E-4	0.39781503107929933	0.42234848484848486	33	4	false	"CpCp13_RS03645"	22	128.21212121212122	0	33	0	0.9967792956157318	false	0	"CpCp13_RS09630"	43038	0.1277013159483279
2.4578598484848486	4.640281259502435E-5	0.40685802350221534	0.42153846153846153	26	4	false	"CpCp13_RS01575"	22	165.0	0	26	0	0.9968981705351385	false	0	"CpCp13_RS01385"	21568	0.14601769911504425
2.284564393939394	0.004044585149493147	0.437720207253886	0.1456633748389867	165	4	false	"CpCp13_RS09710"	22	71.28467153284672	0	165	28	0.9972668842682141	false	0	"CpCp13_RS09635"	600866	0.05184339747843397
2.386837121212121	2.7197595139625484E-4	0.41896449117238643	0.5020645161290322	161	4	false	"CpCp13_RS02270"	22	142.664	0	161	36	0.9970492827208253	false	0	"CpCp13_RS10380"	112576	0.12183091374893254
2.3106060606060606	2.313968000245983E-4	0.43278688524590164	0.4270861833105335	86	4	false	"CpCp13_RS05365"	22	176.8953488372093	0	86	0	0.9972114764667956	false	0	"CpCp13_RS05685"	126598	0.12893246999796595
2.4573863636363638	5.833801078840496E-4	0.40693641618497106	0.3518987341772152	90	4	false	"CpCp13_RS00625"	22	102.275	0	90	10	0.9968991779497098	false	0	"CpCp13_RS08780"	129222	0.09549486461251167
2.5303030303030303	2.2386610522691364E-4	0.39520958083832336	0.42210020590253944	120	4	false	"CpCp13_RS01440"	22	106.29787234042553	0	120	26	0.9967440361057383	false	0	"CpCp13_RS10280"	70310	0.11693935350981907
2.728219696969697	1.182485479766242E-4	0.36653939604304064	0.29473684210526313	25	4	false	"CpCp13_RS07765"	22	71.95	0	25	5	0.9963229368149581	false	0	"CpCp13_RS05360"	15040	0.1238382099827883
2.390151515151515	9.063005103422499E-5	0.4183835182250396	0.4345098039215686	51	4	false	"CpCp13_RS07075"	22	191.92156862745097	0	51	0	0.9970422308188266	false	0	"CpCp13_RS04265"	43282	0.15440190557317054
2.2869318181818183	1.2313498707060502E-4	0.4372670807453416	0.40016038492381717	93	4	false	"CpCp13_RS04520"	22	182.68965517241378	0	93	6	0.9972618471953578	false	0	"CpCp13_RS06960"	66166	0.12811336267350196
2.599905303030303	3.659983364308933E-4	0.38462939355308684	0.39096045197740115	80	4	false	"CpCp13_RS03420"	22	86.55	0	80	20	0.9965959461637653	false	0	"CpCp13_RS02730"	60666	0.10873115577889447
2.3011363636363638	2.1053790862053862E-4	0.4345679012345679	0.3916083916083916	66	4	false	"CpCp13_RS04110"	22	172.83333333333334	0	66	0	0.9972316247582205	false	0	"CpCp13_RS09570"	118384	0.12231658410002359
2.256628787878788	0.0021206656839454696	0.4431389005455308	0.16663727737612413	126	3	false	"CpCp13_RS01725"	22	83.51401869158879	0	126	19	0.9973263217279175	false	0	"CpCp13_RS07105"	377032	0.05708408659712152
2.393939393939394	3.218298231167943E-5	0.4177215189873418	0.5399129172714079	54	4	false	"CpCp13_RS09530"	22	225.0566037735849	0	54	1	0.9970341715022566	false	0	"CpCp13_RS03290"	20912	0.18135101029297737
2.140151515151515	0.0038513022957078627	0.4672566371681416	0.15315833173660343	349	4	false	"CpCp13_RS02580"	22	106.05211726384364	0	349	42	0.9975741457124436	false	0	"CpCp13_RS05715"	878756	0.07018670897673306
2.617424242424242	3.01103310357301E-4	0.38205499276411004	0.3884057971014493	55	4	false	"CpCp13_RS09415"	22	94.84782608695652	0	55	9	0.9965586718246292	false	0	"CpCp13_RS03085"	57048	0.12206927424318728
2.3380681818181817	6.127406112682548E-5	0.4277035236938032	0.45674531155474896	58	4	false	"CpCp13_RS05115"	22	229.77586206896552	0	58	0	0.9971530464216635	false	0	"CpCp13_RS00940"	37202	0.17045687097104267
2.5615530303030303	3.6812487850039727E-4	0.39038817005545284	0.3512987012987013	65	3	false	"CpCp13_RS03515"	22	69.73214285714286	0	65	9	0.9966775467440362	false	0	"CpCp13_RS07550"	71328	0.08015188834154352
2.5615530303030303	2.678273833094132E-4	0.39038817005545284	0.3632183908045977	32	4	false	"CpCp13_RS04145"	22	84.96666666666667	0	32	2	0.9966775467440362	false	0	"CpCp13_RS08410"	43006	0.09306316173786053
2.290246212121212	1.5294413287743065E-4	0.4366342774446972	0.37670068027210885	49	4	false	"CpCp13_RS01495"	22	204.0	0	49	0	0.9972547952933591	false	0	"CpCp13_RS03955"	90896	0.13953488372093023
2.612215909090909	3.602432847015643E-4	0.38281674823273515	0.2777777777777778	42	4	false	"CpCp13_RS04375"	22	54.035714285714285	0	42	14	0.9965697533849129	false	0	"CpCp13_RS10640"	36572	0.06814087551792469
2.3920454545454546	3.5760429626321765E-5	0.4180522565320665	0.4714285714285714	36	4	false	"CpCp13_RS00660"	22	223.58333333333334	0	36	0	0.9970382011605416	false	0	"CpCp13_RS04340"	18212	0.177025600422275
2.6676136363636362	8.533745353869625E-5	0.37486687965921195	0.47692307692307695	26	4	false	"CpCp13_RS10150"	22	114.15384615384616	0	26	0	0.9964518858800774	false	0	"CpCp13_RS04465"	15412	0.15723670269124815
2.312973484848485	3.2519249557154097E-4	0.4323439099283521	0.38095238095238093	98	4	false	"CpCp13_RS10250"	22	172.43956043956044	0	98	7	0.9972064393939394	false	0	"CpCp13_RS00925"	125976	0.12642196513164256
2.343276515151515	1.1656893060608785E-4	0.4267528793695696	0.4188428059395801	67	4	false	"CpCp13_RS06755"	22	182.36507936507937	0	67	4	0.9971419648613797	false	0	"CpCp13_RS01420"	69448	0.1366030557041793
2.671401515151515	2.660533010786895E-4	0.3743353420772776	0.3096774193548387	43	4	false	"CpCp13_RS04975"	22	59.58064516129032	0	43	12	0.9964438265635075	false	0	"CpCp13_RS10190"	32772	0.08892633606162735
2.218276515151515	0.0023004354067957117	0.45080042689434363	0.17213905574056207	291	4	false	"CpCp13_RS08380"	22	105.00787401574803	0	291	37	0.9974079223081883	false	0	"CpCp13_RS05660"	514638	0.07511292848050646
2.7239583333333335	1.2410976443205158E-4	0.36711281070745694	0.2714285714285714	26	4	false	"CpCp13_RS09675"	22	70.66666666666667	0	26	5	0.9963320035460993	false	0	"CpCp13_RS00910"	18588	0.11699779249448124
2.3167613636363638	2.413701897722872E-4	0.4316370324954016	0.4537373737373737	114	4	false	"CpCp13_RS02260"	22	162.14	0	114	14	0.9971983800773694	false	0	"CpCp13_RS09745"	127222	0.12046062407132244
2.374526515151515	8.949765476231532E-5	0.42113659022931205	0.36363636363636365	33	4	false	"CpCp13_RS06435"	22	185.96969696969697	0	33	0	0.9970754754996777	false	0	"CpCp13_RS08490"	44598	0.14316373900669513
2.272727272727273	5.909447493327713E-4	0.43999999999999995	0.3026124818577649	63	4	false	"CpCp13_RS03020"	22	129.83018867924528	0	63	10	0.9972920696324952	false	0	"CpCp13_RS04565"	166052	0.08748665005339978
2.4043560606060606	0.0017004029209162477	0.4159117762898779	0.23529411764705882	109	4	false	"CpCp13_RS04010"	22	88.78823529411764	0	109	24	0.9970120083816892	false	0	"CpCp13_RS00945"	272240	0.07543605377580088
2.4076704545454546	0.001735916291563106	0.4153392330383481	0.18217338217338216	114	4	false	"CpCp13_RS10405"	22	70.63736263736264	0	114	23	0.9970049564796906	false	0	"CpCp13_RS07540"	280992	0.0606329293024572
2.446496212121212	3.39272877081665E-5	0.4087478227211148	0.43103448275862066	29	4	false	"CpCp13_RS08605"	22	172.31034482758622	0	29	0	0.9969223484848485	false	0	"CpCp13_RS05845"	22226	0.1476523948822504
2.2021780303030303	3.4784744710536123E-4	0.4540958933562675	0.35765838011226947	87	4	false	"CpCp13_RS05095"	22	218.60919540229884	0	87	0	0.9974421744036106	false	0	"CpCp13_RS01430"	193670	0.13663074712643677
2.328125	3.936369159645E-4	0.42953020134228187	0.2901724320321591	148	4	false	"CpCp13_RS08860"	22	133.33333333333334	0	148	10	0.9971742021276596	false	0	"CpCp13_RS02565"	108634	0.10335917312661498
2.3740530303030303	1.0237525744792784E-4	0.42122058236936577	0.46390168970814133	65	4	false	"CpCp13_RS08760"	22	210.0952380952381	0	65	2	0.9970764829142489	false	0	"CpCp13_RS06635"	41288	0.16529916451238244
2.215909090909091	0.0013552482255974588	0.4512820512820513	0.23595505617977527	106	3	false	"CpCp13_RS02075"	22	106.74444444444444	0	106	16	0.9974129593810446	false	0	"CpCp13_RS03525"	312596	0.06816375762735916
2.4853219696969697	5.281157775498766E-4	0.4023623547342351	0.24751984126984128	75	4	false	"CpCp13_RS09425"	22	89.25	0	75	11	0.9968397404900063	false	0	"CpCp13_RS06065"	107366	0.087158203125
2.2760416666666665	1.8175755443731702E-4	0.4393592677345538	0.41525857654889914	63	4	false	"CpCp13_RS09765"	22	199.61904761904762	0	63	0	0.9972850177304964	false	0	"CpCp13_RS05545"	119698	0.13561076604554864
2.441287878787879	3.163134154625932E-4	0.40961986035686576	0.3468286099865047	39	4	false	"CpCp13_RS00180"	22	137.25641025641025	0	39	0	0.9969334300451321	false	0	"CpCp13_RS06700"	63766	0.12008434843080512
2.3612689393939394	1.0260575608963792E-4	0.42350110286745535	0.4361111111111111	94	4	false	"CpCp13_RS05285"	22	179.6172839506173	0	94	13	0.9971036831076725	false	0	"CpCp13_RS00435"	43790	0.14043571849149122
2.2978219696969697	3.5729536625534944E-4	0.4351947249124253	0.3432323232323232	115	4	false	"CpCp13_RS00115"	22	132.29	0	115	15	0.9972386766602191	false	0	"CpCp13_RS06530"	138842	0.09530979827089338
2.429924242424242	7.045582427400833E-4	0.41153546375682	0.28519593613933236	53	4	false	"CpCp13_RS03070"	22	103.28301886792453	0	53	0	0.996957607994842	false	0	"CpCp13_RS01525"	114642	0.08950001635002125
2.4318181818181817	3.778168440863855E-5	0.4112149532710281	0.5101596516690856	53	4	false	"CpCp13_RS05645"	22	203.79245283018867	0	53	0	0.9969535783365571	false	0	"CpCp13_RS02420"	22430	0.17212200407955125
2.2864583333333335	9.42654839547375E-5	0.4373576309794988	0.4261569416498994	71	4	false	"CpCp13_RS06770"	22	221.61971830985917	0	71	0	0.9972628546099291	false	0	"CpCp13_RS05290"	62114	0.1539025821596244
2.2386363636363638	9.137080566057618E-4	0.44670050761421315	0.26271802325581395	156	4	false	"CpCp13_RS05465"	22	128.48062015503876	0	156	27	0.9973646034816247	false	0	"CpCp13_RS05930"	266392	0.08663561709712661
2.273674242424242	0.0012274438063379534	0.43981674302374013	0.20616340181557574	118	4	false	"CpCp13_RS00860"	22	105.8804347826087	0	118	26	0.9972900548033526	false	0	"CpCp13_RS10350"	265648	0.07332440081898109
2.437973484848485	1.7074614009105342E-4	0.41017673334628085	0.4828469022017409	65	3	false	"CpCp13_RS07860"	22	156.61904761904762	0	65	2	0.9969404819471308	false	0	"CpCp13_RS09040"	67360	0.13934078969666158
2.2826704545454546	2.73368629905007E-4	0.4380833851897946	0.3093877551020408	50	3	false	"CpCp13_RS00450"	22	182.04	0	50	0	0.997270913926499	false	0	"CpCp13_RS02470"	115156	0.124259385665529
2.4071969696969697	4.8627117843119445E-5	0.4154209284028324	0.5136363636363637	56	4	false	"CpCp13_RS05205"	22	229.60714285714286	0	56	0	0.9970059638942617	false	0	"CpCp13_RS09330"	25948	0.1888216635338346
2.4266098484848486	2.241811106312272E-4	0.41209756097560973	0.325609756097561	41	4	false	"CpCp13_RS03180"	23	132.8780487804878	0	41	0	0.9969646598968407	false	0	"CpCp13_RS07685"	60516	0.11337717472737867
2.2178030303030303	0.004777137964415096	0.45089666951323654	0.14263128176171655	265	4	false	"CpCp13_RS05815"	23	90.97835497835497	0	265	34	0.9974089297227595	false	0	"CpCp13_RS09875"	764508	0.06397915258674752
2.4204545454545454	1.0116559541761759E-4	0.4131455399061033	0.6164874551971327	63	4	false	"CpCp13_RS04095"	23	178.26984126984127	0	63	0	0.9969777562862668	false	0	"CpCp13_RS05740"	50012	0.15341638663497528
2.4398674242424243	6.904524715043707E-4	0.40985833495051427	0.375	64	4	false	"CpCp13_RS00090"	23	113.09375	0	64	0	0.9969364522888459	false	0	"CpCp13_RS01685"	168108	0.1009765625
2.366950757575758	2.1185395827703633E-4	0.42248449689937984	0.40194805194805194	59	4	false	"CpCp13_RS02550"	23	185.30357142857142	0	59	3	0.9970915941328176	false	0	"CpCp13_RS03640"	81382	0.14386923247559893
2.4195075757575757	6.02604657386563E-4	0.413307240704501	0.34829001367989054	111	3	false	"CpCp13_RS00025"	23	105.65116279069767	0	111	25	0.9969797711154095	false	0	"CpCp13_RS02410"	159030	0.09267645858833129
2.530776515151515	2.7243453051811517E-4	0.3951356407857811	0.34984984984984985	37	4	false	"CpCp13_RS06430"	23	107.35135135135135	0	37	0	0.996743028691167	false	0	"CpCp13_RS02600"	59084	0.11194092945917763
2.143939393939394	0.0029824756996796554	0.4664310954063604	0.15033763044812767	211	3	false	"CpCp13_RS06510"	23	98.37016574585635	0	211	30	0.9975660863958736	false	0	"CpCp13_RS04520"	727182	0.060461072984546005
2.2490530303030303	2.512205428808872E-4	0.44463157894736843	0.30261136712749614	63	4	false	"CpCp13_RS00895"	23	197.22222222222223	0	63	0	0.9973424403610575	false	0	"CpCp13_RS06000"	120210	0.12924129896606962
2.288825757575758	3.160251517323792E-4	0.4369052544476624	0.33391279153991016	126	4	false	"CpCp13_RS01800"	23	163.33898305084745	0	126	8	0.9972578175370729	false	0	"CpCp13_RS09755"	116842	0.11734122345606858
2.4318181818181817	2.9703448081184574E-4	0.4112149532710281	0.40194805194805194	69	4	false	"CpCp13_RS09850"	23	99.32142857142857	0	69	13	0.9969535783365571	false	0	"CpCp13_RS09080"	67726	0.08644162625885864
2.371212121212121	2.3468136003127098E-4	0.42172523961661346	0.36627450980392157	51	4	false	"CpCp13_RS02585"	23	160.07843137254903	0	51	0	0.9970825274016764	false	0	"CpCp13_RS08710"	83900	0.12506127450980392
2.2798295454545454	6.026147100704404E-4	0.4386292834890966	0.3922369765066394	101	4	false	"CpCp13_RS01635"	23	132.47191011235955	0	101	12	0.9972769584139265	false	0	"CpCp13_RS08805"	211916	0.0924437614182551
2.334753787878788	0.001634419095388559	0.42831068748732504	0.19613719613719613	103	3	false	"CpCp13_RS02370"	23	81.65384615384616	0	103	25	0.9971600983236621	false	0	"CpCp13_RS01720"	286948	0.06153266477305663
2.483901515151515	1.622440013509558E-4	0.40259245139153643	0.4575569358178054	70	4	false	"CpCp13_RS04765"	23	149.4	0	70	0	0.9968427627337202	false	0	"CpCp13_RS05040"	66374	0.14632713026444663
2.1605113636363638	0.0028805594109273885	0.462853385930309	0.18382747261166016	274	4	false	"CpCp13_RS05085"	23	118.64192139737992	0	274	45	0.99753082688588	false	0	"CpCp13_RS02215"	843006	0.07664206808616274
2.178977272727273	0.006756478812803099	0.4589308996088657	0.11280931586608442	248	4	false	"CpCp13_RS01350"	23	83.21834061135371	0	248	19	0.9974915377176016	false	0	"CpCp13_RS03420"	1161594	0.055254962682023
2.3802083333333335	2.454074784485054E-4	0.4201312910284464	0.27645687645687644	77	4	false	"CpCp13_RS03355"	23	107.45454545454545	0	77	11	0.9970633865248227	false	0	"CpCp13_RS09805"	62598	0.08514623253133555
2.265151515151515	0.001897527634893694	0.4414715719063545	0.1546788206808147	130	4	false	"CpCp13_RS02770"	23	83.59663865546219	0	130	11	0.997308188265635	false	0	"CpCp13_RS09420"	383686	0.05829612179599873
2.415719696969697	2.424791326940231E-4	0.41395531164249316	0.3146341463414634	50	4	false	"CpCp13_RS07315"	23	136.3658536585366	0	50	9	0.9969878304319794	false	0	"CpCp13_RS00930"	53682	0.11344912949961447
2.4360795454545454	5.146969227104782E-4	0.41049562682215746	0.29909154437456326	74	4	false	"CpCp13_RS05725"	23	110.48148148148148	0	74	20	0.9969445116054159	false	0	"CpCp13_RS10050"	97496	0.0963221285801931
2.1983901515151514	0.0036796682668213385	0.4548783114365712	0.26448039323575806	313	3	false	"CpCp13_RS00245"	23	111.02991452991454	0	313	79	0.9974502337201806	false	0	"CpCp13_RS02210"	904000	0.07610000995881736
2.25	1.899417208613361E-4	0.4444444444444444	0.4009493670886076	80	4	false	"CpCp13_RS00970"	23	221.0875	0	80	0	0.9973404255319149	false	0	"CpCp13_RS05525"	117400	0.14670703384207034
2.4053030303030303	1.3537751671724872E-4	0.415748031496063	0.47163362952836635	85	4	false	"CpCp13_RS05000"	23	147.9090909090909	0	85	8	0.9970099935525468	false	0	"CpCp13_RS09045"	58600	0.12429335370511842
2.434659090909091	1.8670936366520336E-4	0.4107351225204201	0.43116883116883115	56	4	false	"CpCp13_RS03155"	23	151.10714285714286	0	56	0	0.9969475338491296	false	0	"CpCp13_RS08480"	61726	0.1325501253132832
2.303977272727273	5.680366618227272E-5	0.43403205918618987	0.45353594389246055	59	4	false	"CpCp13_RS08315"	23	222.76271186440678	0	59	0	0.9972255802707931	false	0	"CpCp13_RS06475"	43594	0.15731829933927033
2.4711174242424243	2.746962359384337E-4	0.4046752251389155	0.2972972972972973	41	4	false	"CpCp13_RS00225"	23	101.94594594594595	0	41	4	0.9968699629271438	false	0	"CpCp13_RS06610"	54952	0.0935283907760972
2.508049242424242	0.0011007955779613826	0.39871625448367004	0.20327700972862264	75	3	false	"CpCp13_RS06890"	23	71.57142857142857	0	75	12	0.9967913845905867	false	0	"CpCp13_RS06450"	173348	0.07333138173302108
2.446022727272727	4.8856178145954376E-5	0.4088269454123113	0.45989304812834225	34	4	false	"CpCp13_RS08780"	23	162.91176470588235	0	34	0	0.9969233558994197	false	0	"CpCp13_RS03610"	24086	0.1422810172103776
2.472537878787879	3.6370211567960005E-4	0.4044427422443508	0.38386524822695034	48	4	false	"CpCp13_RS01430"	23	110.91666666666667	0	48	0	0.9968669406834301	false	0	"CpCp13_RS03185"	82778	0.10375740567508575
2.6676136363636362	1.5700158073732624E-4	0.37486687965921195	0.3333333333333333	23	4	false	"CpCp13_RS09915"	23	67.9047619047619	0	23	2	0.9964518858800774	false	0	"CpCp13_RS04970"	20578	0.09742433558789369
2.266098484848485	3.580254119724523E-4	0.4412870873380694	0.39120502569960025	121	4	false	"CpCp13_RS05710"	23	154.50485436893203	0	121	18	0.9973061734364925	false	0	"CpCp13_RS05370"	174340	0.10648163636728604
2.2788825757575757	1.6509238731726342E-4	0.43881155204654065	0.39890560875513	90	4	false	"CpCp13_RS02205"	23	177.48837209302326	0	90	4	0.997278973243069	false	0	"CpCp13_RS09915"	90558	0.12317027903749012
2.2320075757575757	2.2758492665771022E-4	0.44802715316079766	0.398905954134231	98	4	false	"CpCp13_RS06875"	23	225.8469387755102	0	98	0	0.9973787072856222	false	0	"CpCp13_RS05100"	140172	0.1479993045711076
2.210227272727273	3.300084643650661E-4	0.4524421593830334	0.3093167701863354	70	4	false	"CpCp13_RS09455"	23	204.1	0	70	0	0.9974250483558995	false	0	"CpCp13_RS03255"	204426	0.1275625
2.2632575757575757	1.966706149467147E-4	0.44184100418410044	0.4118918918918919	78	4	false	"CpCp13_RS10890"	23	204.26666666666668	0	78	3	0.9973122179239201	false	0	"CpCp13_RS08250"	98872	0.13773881771184535
2.6382575757575757	3.8476091348779707E-4	0.37903804737975594	0.3551020408163265	71	4	false	"CpCp13_RS00340"	23	67.36	0	71	21	0.9965143455834945	false	0	"CpCp13_RS10465"	58788	0.0940782122905028
2.304450757575758	1.846674885918584E-4	0.4339428806246147	0.3494060097833683	54	4	false	"CpCp13_RS04990"	23	173.38888888888889	0	54	0	0.9972245728562218	false	0	"CpCp13_RS06285"	100232	0.12236336548263153
2.4834280303030303	4.861023977252915E-4	0.4026692087702574	0.40072072072072074	104	4	false	"CpCp13_RS03650"	23	98.53333333333333	0	104	29	0.9968437701482915	false	0	"CpCp13_RS02450"	104194	0.0966961072947334
2.2803030303030303	6.909420466526897E-5	0.43853820598006643	0.39786967418546365	57	4	false	"CpCp13_RS10635"	23	230.33333333333334	0	57	0	0.9972759509993553	false	0	"CpCp13_RS00880"	49608	0.15690281562216168
2.3764204545454546	0.001035638412533514	0.42080095636580994	0.3860075408462505	205	3	false	"CpCp13_RS02285"	23	112.89677419354838	0	205	50	0.9970714458413927	false	0	"CpCp13_RS04110"	285974	0.09715729276553217
2.6145833333333335	2.2255965663067967E-4	0.38247011952191234	0.3634920634920635	50	4	false	"CpCp13_RS03785"	23	84.94444444444444	0	50	14	0.9965647163120568	false	0	"CpCp13_RS04605"	39168	0.10848588051653185
2.5733901515151514	7.270487809537842E-4	0.38859245630174793	0.24923896499238965	92	4	false	"CpCp13_RS07380"	23	81.24657534246575	0	92	19	0.9966523613797551	false	0	"CpCp13_RS05710"	116104	0.09765213382507903
2.2073863636363638	5.495963922682836E-4	0.453024453024453	0.3501737503341353	87	4	false	"CpCp13_RS04425"	23	184.0	0	87	0	0.9974310928433269	false	0	"CpCp13_RS02205"	258562	0.11565053425518541
2.2637310606060606	0.0019902903071252207	0.4417485881614725	0.23394495412844038	138	4	false	"CpCp13_RS09285"	23	103.26605504587155	0	138	29	0.9973112105093488	false	0	"CpCp13_RS00085"	378506	0.0713163363576461
2.397253787878788	6.580475518180866E-5	0.41714398577918227	0.4477503628447025	53	4	false	"CpCp13_RS10755"	23	187.1509433962264	0	53	0	0.9970271196002578	false	0	"CpCp13_RS05025"	32668	0.15277628032345014
2.566287878787879	8.263578669439265E-5	0.3896678966789668	0.4126984126984127	36	4	false	"CpCp13_RS03560"	23	118.77777777777777	0	36	0	0.9966674725983237	false	0	"CpCp13_RS09210"	26220	0.13330839256765184
2.506628787878788	0.0012004731455133853	0.398942198715527	0.2883420926899188	119	4	false	"CpCp13_RS01225"	23	84.8586956521739	0	119	27	0.9967944068343004	false	0	"CpCp13_RS02500"	185882	0.08913728534892218
2.6898674242424243	5.9269621839944444E-5	0.3717655342369301	0.3904761904761905	16	4	false	"CpCp13_RS00015"	23	89.06666666666666	0	16	1	0.9964045373952288	false	0	"CpCp13_RS04190"	8428	0.12945736434108526
2.636837121212121	1.286859873163973E-4	0.379242233794218	0.4860215053763441	36	4	false	"CpCp13_RS02265"	23	101.51612903225806	0	36	5	0.9965173678272082	false	0	"CpCp13_RS08335"	31066	0.13392629159928504
2.0918560606060606	0.0043156097106104635	0.4780443639655953	0.14827615634067248	250	3	false	"CpCp13_RS06145"	23	107.3041474654378	0	250	33	0.9976769019987105	false	0	"CpCp13_RS01725"	1018088	0.06308297910960481
2.2713068181818183	0.0019724411537617257	0.440275171982489	0.237886438125609	268	3	false	"CpCp13_RS10740"	23	102.74178403755869	0	268	55	0.9972950918762089	false	0	"CpCp13_RS04480"	570836	0.07748249173269886
2.393465909090909	0.0010501097470607126	0.4178041543026706	0.301684231261696	175	4	false	"CpCp13_RS05495"	23	107.13986013986013	0	175	32	0.9970351789168278	false	0	"CpCp13_RS09795"	292086	0.09406484647924507
2.262310606060606	1.5564455080026822E-4	0.44202595228128927	0.4152917505030181	71	4	false	"CpCp13_RS01455"	23	211.90140845070422	0	71	0	0.9973142327530625	false	0	"CpCp13_RS05230"	102956	0.14174007254227708
2.7982954545454546	1.5606139600247924E-4	0.35736040609137054	0.3567251461988304	19	4	false	"CpCp13_RS04295"	23	55.05263157894737	0	19	0	0.996173839458414	false	0	"CpCp13_RS02085"	15726	0.11967963386727688
2.273200757575758	1.0942886984261552E-4	0.4399083524265778	0.4251718667371761	62	4	false	"CpCp13_RS05165"	23	238.75806451612902	0	62	0	0.997291062217924	false	0	"CpCp13_RS05585"	68120	0.16165068687618755
2.318655303030303	1.2284888081372694E-4	0.43128445987339187	0.3867924528301887	53	4	false	"CpCp13_RS02035"	3	205.32075471698113	0	53	0	0.9971943504190844	false	0	"CpCp13_RS03850"	65866	0.14739465521678474
2.5104166666666665	9.794270963773804E-4	0.39834024896265563	0.3082381446867428	131	4	false	"CpCp13_RS01980"	3	92.51851851851852	0	131	23	0.9967863475177304	false	0	"CpCp13_RS03230"	170510	0.0995893633137982
2.675662878787879	2.9569721937003216E-4	0.37373916121040524	0.3115942028985507	24	4	false	"CpCp13_RS05905"	3	62.458333333333336	0	24	0	0.9964347598323662	false	0	"CpCp13_RS07450"	32968	0.09308246398410333
2.618371212121212	4.3638878938968736E-4	0.3819168173598554	0.29417206290471787	67	4	false	"CpCp13_RS08030"	3	55.255319148936174	0	67	20	0.9965566569954868	false	0	"CpCp13_RS01135"	57004	0.07270436730123181
2.476325757575758	8.847702127048987E-5	0.40382409177820267	0.5093896713615024	79	4	false	"CpCp13_RS09885"	3	152.90277777777777	0	79	7	0.9968588813668601	false	0	"CpCp13_RS07995"	41702	0.14716340498342423
2.570549242424242	3.423502152915269E-4	0.3890219193221588	0.30256410256410254	46	4	false	"CpCp13_RS07880"	3	80.775	0	46	6	0.9966584058671825	false	0	"CpCp13_RS01530"	61088	0.09273823191733639
2.429450757575758	0.0050107403678974205	0.41161566946014416	0.1305229610314356	132	4	false	"CpCp13_RS05760"	3	57.55084745762712	0	132	14	0.9969586154094133	false	0	"CpCp13_RS02895"	597446	0.05289599950149551
2.340909090909091	0.0011228064696651504	0.4271844660194175	0.29938592347661785	187	4	false	"CpCp13_RS00545"	3	106.32876712328768	0	187	41	0.997147001934236	false	0	"CpCp13_RS08590"	326106	0.08513111859350495
2.5047348484848486	1.737690432519029E-4	0.3992438563327032	0.4568764568764569	66	4	false	"CpCp13_RS02185"	3	122.60606060606061	0	66	0	0.9967984364925854	false	0	"CpCp13_RS01740"	56332	0.12459965508745996
2.413352272727273	6.864116604657401E-4	0.41436138905238373	0.3913192071086808	102	4	false	"CpCp13_RS06575"	3	125.51948051948052	0	102	25	0.9969928675048356	false	0	"CpCp13_RS00950"	160922	0.10774204336436097
2.585227272727273	3.0157195498566747E-4	0.38681318681318677	0.4235690235690236	74	4	false	"CpCp13_RS06055"	3	84.4	0	74	19	0.9966271760154739	false	0	"CpCp13_RS01615"	69536	0.1023030303030303
2.3759469696969697	4.0398621122683274E-4	0.42088481466719807	0.27906976744186046	43	4	false	"CpCp13_RS07165"	3	115.34883720930233	0	43	0	0.9970724532559638	false	0	"CpCp13_RS08820"	88420	0.09039877524239995
2.4270833333333335	0.001838767545502375	0.41201716738197425	0.12919254658385093	85	3	false	"CpCp13_RS07580"	3	53.8	0	85	15	0.9969636524822696	false	0	"CpCp13_RS03970"	221458	0.04719298245614035
3.1519886363636362	2.1773996100151767E-5	0.31726002703920686	0.26666666666666666	6	4	false	"CpCp13_RS01830"	3	37.666666666666664	0	6	0	0.9954213007736944	false	0	"CpCp13_RS08345"	1238	0.2036036036036036
2.675189393939394	6.060773863008741E-4	0.37380530973451326	0.21342383107088989	63	4	false	"CpCp13_RS06915"	3	51.90384615384615	0	63	11	0.9964357672469375	false	0	"CpCp13_RS06870"	80862	0.08009852801519468
2.4322916666666665	6.622905148099397E-5	0.411134903640257	0.6158499697519662	58	4	false	"CpCp13_RS03570"	3	189.20689655172413	0	58	0	0.9969525709219857	false	0	"CpCp13_RS08340"	40586	0.16553534256493802
2.394412878787879	0.001538860126958242	0.4176389163535693	0.23537095088819227	111	4	false	"CpCp13_RS10560"	3	92.0909090909091	0	111	23	0.9970331640876854	false	0	"CpCp13_RS05735"	252954	0.07706352225180677
2.2481060606060606	0.001403797216428611	0.4448188711036226	0.24969141244930348	151	4	false	"CpCp13_RS01905"	3	98.07476635514018	0	151	44	0.9973444551901999	false	0	"CpCp13_RS01670"	306942	0.06617730523288812
2.421401515151515	2.9272778626107658E-5	0.41298396558466954	0.4939870490286771	47	4	false	"CpCp13_RS10555"	3	218.93617021276594	0	47	0	0.9969757414571244	false	0	"CpCp13_RS03275"	18716	0.1842897055663013
2.337121212121212	2.132289584187937E-4	0.42787682333873583	0.3835450695704779	59	3	false	"CpCp13_RS06345"	3	179.1551724137931	0	59	1	0.997155061250806	false	0	"CpCp13_RS06775"	81890	0.13349863816228993
2.1766098484848486	0.004413368793742041	0.45943006308462037	0.2008596542065102	265	3	false	"CpCp13_RS08825"	3	113.0	0	265	61	0.9974965747904577	false	0	"CpCp13_RS02740"	859308	0.0736156351791531
2.554924242424242	2.32139917109772E-4	0.3914010378057821	0.35135135135135137	45	4	false	"CpCp13_RS06415"	3	85.10810810810811	0	45	8	0.9966916505480335	false	0	"CpCp13_RS03745"	40340	0.09311609202200012
2.168560606060606	0.003332897291292361	0.4611353711790393	0.17444197609224585	161	4	false	"CpCp13_RS03825"	3	98.83333333333333	0	161	23	0.9975137008381689	false	0	"CpCp13_RS04530"	633120	0.06104591311509162
2.3224431818181817	9.369294951643128E-5	0.4305810397553517	0.4471380471380471	55	4	false	"CpCp13_RS05615"	3	216.74545454545455	0	55	0	0.9971862911025144	false	0	"CpCp13_RS01395"	57016	0.156721225267863
2.0625	0.008536908923882171	0.48484848484848486	0.1281970664224297	430	4	false	"CpCp13_RS06515"	3	95.04960835509138	0	430	47	0.9977393617021276	false	0	"CpCp13_RS03980"	1862130	0.0594431571951791
2.4957386363636362	4.583616938726991E-4	0.40068298235628913	0.32364460935889505	127	4	false	"CpCp13_RS10290"	3	100.83838383838383	0	127	28	0.9968175773694391	false	0	"CpCp13_RS05970"	115666	0.1039570967406019
2.5416666666666665	2.0623691258310202E-4	0.3934426229508197	0.2751322751322751	35	4	false	"CpCp13_RS03100"	3	100.60714285714286	0	35	7	0.9967198581560284	false	0	"CpCp13_RS03050"	28672	0.10635004530353367
2.3882575757575757	8.840863634190594E-4	0.41871530531324347	0.3941562313655337	174	3	false	"CpCp13_RS02095"	3	118.61538461538461	0	174	44	0.9970462604771115	false	0	"CpCp13_RS10390"	226360	0.10207864424731894
2.431344696969697	3.3887286595542644E-4	0.41129503407984425	0.4338575393154487	47	4	false	"CpCp13_RS06535"	3	152.0	0	47	0	0.9969545857511283	false	0	"CpCp13_RS04240"	63632	0.13080895008605853
2.2755681818181817	0.00309879899586326	0.4394506866416979	0.19160583941605838	169	4	false	"CpCp13_RS07705"	3	94.42335766423358	0	169	32	0.9972860251450677	false	0	"CpCp13_RS10685"	485918	0.06773555069170271
2.5946969696969697	1.955991033216045E-4	0.3854014598540146	0.5095137420718816	60	4	false	"CpCp13_RS04040"	3	102.6590909090909	0	60	16	0.996607027724049	false	0	"CpCp13_RS01620"	41340	0.1251940133037694
2.3731060606060606	1.8304208541206174E-4	0.4213886671987231	0.4144927536231884	46	4	false	"CpCp13_RS01035"	3	214.2391304347826	0	46	0	0.9970784977433914	false	0	"CpCp13_RS01540"	65194	0.16724366154159453
2.277462121212121	0.002011646608699458	0.4390852390852391	0.2349673202614379	180	3	false	"CpCp13_RS03590"	3	102.08088235294117	0	180	44	0.9972819954867828	false	0	"CpCp13_RS08370"	441138	0.07343948370715192
2.863162878787879	4.657287941670328E-5	0.349264097899785	0.4666666666666667	20	4	false	"CpCp13_RS00195"	3	54.8125	0	20	4	0.9960358236621535	false	0	"CpCp13_RS02910"	5524	0.14090616966580977
2.4630681818181817	0.0028746835971766764	0.40599769319492507	0.14978499761108457	109	3	false	"CpCp13_RS01840"	3	60.130434782608695	0	109	17	0.9968870889748549	false	0	"CpCp13_RS03920"	342006	0.05770675123091046
2.3641098484848486	4.737055227918558E-5	0.42299218906469055	0.4821256038647343	46	4	false	"CpCp13_RS03175"	3	243.47826086956522	0	46	0	0.9970976386202449	false	0	"CpCp13_RS04965"	27426	0.18515457100347166
2.621212121212121	4.0844817761847543E-4	0.38150289017341044	0.32688172043010755	36	4	false	"CpCp13_RS00220"	3	67.41935483870968	0	36	5	0.9965506125080593	false	0	"CpCp13_RS10515"	52366	0.08632439800090867
2.555871212121212	0.0021443208987069994	0.39125602074842536	0.15101721439749607	87	3	false	"CpCp13_RS08695"	3	39.25	0	87	15	0.9966896357188911	false	0	"CpCp13_RS06875"	209178	0.04535966602440591
2.3257575757575757	0.00116652781755932	0.42996742671009774	0.34388285309400096	194	4	false	"CpCp13_RS01265"	3	113.32876712328768	0	194	48	0.9971792392005159	false	0	"CpCp13_RS10430"	280516	0.08860732378677691
2.152462121212121	0.004224138006582325	0.46458424989001323	0.14169463774048302	390	4	false	"CpCp13_RS01140"	3	101.17142857142858	0	390	40	0.9975479529335912	false	0	"CpCp13_RS10545"	932856	0.07011187011187012
2.574810606060606	6.204047444093393E-4	0.3883780801765355	0.28988895382817065	82	4	false	"CpCp13_RS04130"	3	61.3728813559322	0	82	23	0.9966493391360413	false	0	"CpCp13_RS02070"	85708	0.0728029434827191
2.706439393939394	1.84321836329677E-4	0.36948915325402376	0.36507936507936506	39	4	false	"CpCp13_RS04555"	3	62.785714285714285	0	39	11	0.9963692778852353	false	0	"CpCp13_RS03860"	27270	0.10309641097818438
2.228219696969697	0.003382639183679394	0.448788780280493	0.18736141906873613	207	4	false	"CpCp13_RS07885"	3	98.67272727272727	0	207	42	0.9973867666021922	false	0	"CpCp13_RS09530"	648986	0.06730745380131464
2.2803030303030303	1.9471083846349849E-4	0.43853820598006643	0.4047138047138047	55	4	false	"CpCp13_RS00030"	3	195.16363636363636	0	55	0	0.9972759509993553	false	0	"CpCp13_RS09500"	88096	0.13294525637849888
2.898674242424242	6.305305955961407E-5	0.344985298921921	0.38461538461538464	13	4	false	"CpCp13_RS10320"	3	42.61538461538461	0	13	0	0.9959602675693101	false	0	"CpCp13_RS03835"	5832	0.14018218623481782
2.289299242424242	1.0657452099204139E-4	0.4368148914167529	0.40861186389641674	84	4	false	"CpCp13_RS06630"	3	197.14634146341464	0	84	2	0.9972568101225016	false	0	"CpCp13_RS02320"	63014	0.1381544088741518
2.496212121212121	3.075918279843365E-4	0.4006069802731411	0.39608217869087436	114	4	false	"CpCp13_RS10870"	3	117.19565217391305	0	114	22	0.9968165699548678	false	0	"CpCp13_RS01175"	91618	0.12007751247327156
2.6775568181818183	5.994578821764782E-4	0.37347480106100794	0.296995108315863	77	4	false	"CpCp13_RS06750"	3	51.46296296296296	0	77	23	0.9964307301740812	false	0	"CpCp13_RS06235"	68424	0.08181711122887593
2.648674242424242	8.134979833368371E-4	0.3775473721844834	0.23410202655485673	72	3	false	"CpCp13_RS06995"	3	46.574074074074076	0	72	18	0.9964921824629271	false	0	"CpCp13_RS07640"	85048	0.06776645641274462
2.531723484848485	1.2615764427993892E-4	0.3949878436506452	0.4396135265700483	46	4	false	"CpCp13_RS01375"	3	138.69565217391303	0	46	0	0.9967410138620245	false	0	"CpCp13_RS03530"	35408	0.1440245609282586
2.4038825757575757	3.339033303802385E-4	0.415993697065196	0.2708618331053352	100	4	false	"CpCp13_RS00155"	3	121.0813953488372	0	100	14	0.9970130157962604	false	0	"CpCp13_RS09305"	72776	0.10217839269944068
2.3726325757575757	1.2479847963084697E-4	0.4214727599281581	0.4304682040531097	54	4	false	"CpCp13_RS08325"	3	214.16666666666666	0	54	0	0.9970795051579626	false	0	"CpCp13_RS05560"	61218	0.16718709341660162
2.387784090909091	5.635028333229922E-4	0.4187983343248067	0.26794871794871794	51	4	false	"CpCp13_RS07040"	3	107.475	0	51	11	0.9970472678916829	false	0	"CpCp13_RS02930"	88588	0.08550119331742244
2.3125	0.0019131086201742491	0.43243243243243246	0.17716049382716048	106	3	false	"CpCp13_RS04695"	3	68.22222222222223	0	106	25	0.9972074468085106	false	0	"CpCp13_RS10795"	263884	0.04976092065807602
2.4545454545454546	5.454535516258011E-4	0.4074074074074074	0.35353535353535354	128	4	false	"CpCp13_RS08035"	3	108.67676767676768	0	128	29	0.9969052224371374	false	0	"CpCp13_RS06125"	129048	0.10310888773886877
2.7760416666666665	8.434261343709887E-5	0.3602251407129456	0.4707692307692308	31	4	false	"CpCp13_RS06840"	3	56.03846153846154	0	31	5	0.9962211879432624	false	0	"CpCp13_RS05795"	14966	0.1136682789826806
2.351799242424242	3.5354099100913175E-4	0.4252063619891283	0.3310489244241386	123	4	false	"CpCp13_RS02980"	3	131.85436893203882	0	123	20	0.9971238313990973	false	0	"CpCp13_RS04720"	98684	0.10333414493106492
2.6107954545454546	3.5180770910182136E-4	0.383025027203482	0.286231884057971	30	4	false	"CpCp13_RS05630"	3	79.75	0	30	6	0.9965727756286267	false	0	"CpCp13_RS07445"	59310	0.09797297297297297
2.3773674242424243	8.729485132589264E-4	0.4206333399721171	0.2704225352112676	90	4	false	"CpCp13_RS10480"	3	107.49295774647888	0	90	19	0.9970694310122501	false	0	"CpCp13_RS09455"	134984	0.08613217768147345
2.2230113636363638	0.00212127874017179	0.4498402555910543	0.19814846759818297	227	4	false	"CpCp13_RS04540"	3	113.43850267379679	0	227	40	0.9973978481624758	false	0	"CpCp13_RS02580"	485816	0.07796460664865759
2.2518939393939394	0.001163392955340256	0.4440706476030277	0.23230987246102977	180	4	false	"CpCp13_RS02850"	3	115.85616438356165	0	180	34	0.9973363958736299	false	0	"CpCp13_RS00805"	364456	0.08073600305474679
2.21875	0.0033806792100339648	0.4507042253521127	0.23452893352462936	251	3	false	"CpCp13_RS07150"	3	109.96585365853659	0	251	46	0.997406914893617	false	0	"CpCp13_RS09415"	829480	0.07610093678791459
2.253787878787879	2.8678005303769033E-4	0.4436974789915966	0.3887005649717514	60	4	false	"CpCp13_RS06240"	3	184.55	0	60	0	0.9973323662153449	false	0	"CpCp13_RS04135"	132070	0.12157444005270092
2.3333333333333335	2.5927265821772637E-4	0.42857142857142855	0.3971929824561404	77	4	false	"CpCp13_RS10510"	3	201.78947368421052	0	77	1	0.9971631205673759	false	0	"CpCp13_RS09665"	115282	0.15137995025072057
2.3262310606060606	4.6623201042195417E-4	0.42987991044168533	0.3397766323024055	117	4	false	"CpCp13_RS02125"	3	141.44329896907217	0	117	20	0.9971782317859446	false	0	"CpCp13_RS10200"	130344	0.1065085082598435
2.331912878787879	6.878518964755963E-5	0.4288324873096446	0.415819209039548	60	4	false	"CpCp13_RS03425"	3	238.2	0	60	0	0.9971661428110896	false	0	"CpCp13_RS00855"	41700	0.1751470588235294
2.3480113636363638	8.589926129151653E-4	0.425892316999395	0.34445916114790287	178	3	false	"CpCp13_RS10175"	3	127.32450331125828	0	178	27	0.9971318907156673	false	0	"CpCp13_RS04345"	278292	0.10385359160787788
2.3390151515151514	5.735486271794815E-4	0.42753036437246966	0.34074074074074073	100	4	false	"CpCp13_RS07115"	3	140.88888888888889	0	100	19	0.997151031592521	false	0	"CpCp13_RS10735"	155484	0.10689597032540887
2.180397727272727	0.0015367127809291863	0.4586319218241043	0.26743921835946377	211	4	false	"CpCp13_RS05075"	3	145.3435582822086	0	211	48	0.9974885154738877	false	0	"CpCp13_RS05115"	449854	0.09257551482943223
2.328598484848485	1.0345625936198048E-4	0.4294428629524197	0.4448087431693989	61	4	false	"CpCp13_RS04325"	3	185.75409836065575	0	61	0	0.9971731947130883	false	0	"CpCp13_RS09810"	50800	0.1361833565693957
2.508996212121212	3.027903995027884E-4	0.3985657671258728	0.3264367816091954	37	4	false	"CpCp13_RS03535"	3	99.06666666666666	0	37	7	0.9967893697614443	false	0	"CpCp13_RS04600"	46900	0.09798878997692054
2.399147727272727	1.830569625899328E-4	0.4168146832445234	0.41739130434782606	46	4	false	"CpCp13_RS01695"	3	174.93478260869566	0	46	0	0.9970230899419729	false	0	"CpCp13_RS02400"	59752	0.1425711349704121
2.328598484848485	2.745696640646979E-4	0.4294428629524197	0.3685446009389671	72	3	false	"CpCp13_RS08170"	3	153.76388888888889	0	72	0	0.9971731947130883	false	0	"CpCp13_RS00755"	119354	0.11423765890704969
2.265625	0.0019746181241957414	0.4413793103448276	0.24571092831962396	216	3	false	"CpCp13_RS00420"	3	115.56216216216217	0	216	31	0.9973071808510638	false	0	"CpCp13_RS03515"	551092	0.08459894741007479
2.769412878787879	3.8254174633539097E-4	0.36108736536160024	0.18153846153846154	29	4	false	"CpCp13_RS02330"	3	37.53846153846154	0	29	3	0.9962352917472599	false	0	"CpCp13_RS08835"	28834	0.07560483870967742
2.6202651515151514	0.0011472103873512223	0.3816407661727503	0.19916142557651992	69	3	false	"CpCp13_RS09475"	3	41.851851851851855	0	69	15	0.9965526273372018	false	0	"CpCp13_RS05215"	100190	0.055951673598732425
2.496685606060606	2.4933556679398354E-4	0.40053100701687844	0.2935606060606061	33	4	false	"CpCp13_RS08715"	3	102.78787878787878	0	33	0	0.9968155625402966	false	0	"CpCp13_RS01330"	53118	0.09950423890404529
2.4696969696969697	0.0011353034780200802	0.4049079754601227	0.17212301587301587	81	4	false	"CpCp13_RS04190"	3	63.453125	0	81	17	0.9968729851708574	false	0	"CpCp13_RS05775"	165282	0.059917965061378656
2.240530303030303	0.0018411770064719283	0.44632290786136936	0.17536711654358714	183	4	false	"CpCp13_RS08345"	3	99.01948051948052	0	183	29	0.9973605738233398	false	0	"CpCp13_RS09970"	434528	0.06819523451754857
2.594223484848485	8.590062610943145E-4	0.3854718014236174	0.24680306905370844	84	4	false	"CpCp13_RS03835"	3	60.130434782608695	0	84	15	0.9966080351386202	false	0	"CpCp13_RS00445"	138978	0.07544596585019912
2.3882575757575757	1.363182175106594E-4	0.41871530531324347	0.5549295774647888	71	4	false	"CpCp13_RS00205"	3	169.08450704225353	0	71	0	0.9970462604771115	false	0	"CpCp13_RS04285"	72086	0.1378031842235155
2.4360795454545454	6.562588956340084E-5	0.41049562682215746	0.41350601295097134	47	4	false	"CpCp13_RS05540"	4	172.51063829787233	0	47	0	0.9969445116054159	false	0	"CpCp13_RS05910"	27116	0.14884438162025224
2.242897727272727	0.004066550072743997	0.4458518049398354	0.11343873517786561	309	4	false	"CpCp13_RS03380"	4	79.66304347826087	0	309	33	0.9973555367504835	false	0	"CpCp13_RS06425"	690388	0.06012305168170631
2.506628787878788	6.397874710455748E-4	0.398942198715527	0.3381712626995646	71	4	false	"CpCp13_RS09515"	4	84.75471698113208	0	71	18	0.9967944068343004	false	0	"CpCp13_RS07130"	101382	0.08561082523346675
2.356534090909091	1.0072418830310471E-4	0.4243520192887282	0.4064625850340136	49	4	false	"CpCp13_RS04395"	4	199.73469387755102	0	49	0	0.9971137572533849	false	0	"CpCp13_RS04230"	40550	0.15154377380694312
2.327651515151515	1.1976626474008678E-4	0.42961757526444266	0.38390379278445885	47	4	false	"CpCp13_RS06620"	4	196.19148936170214	0	47	0	0.9971752095422308	false	0	"CpCp13_RS03250"	71366	0.1420648004067358
2.5478219696969697	1.1155137595546225E-4	0.3924921018398067	0.41341463414634144	42	4	false	"CpCp13_RS08970"	4	130.41463414634146	0	42	1	0.9967067617666021	false	0	"CpCp13_RS05170"	33538	0.14175503711558854
2.28125	0.0014142464624194676	0.4383561643835616	0.2575687005123428	146	4	false	"CpCp13_RS04795"	4	123.74561403508773	0	146	32	0.9972739361702128	false	0	"CpCp13_RS00585"	303760	0.08807517013173503
2.5099431818181817	6.88092101267799E-5	0.39841539332201475	0.4633333333333333	25	4	false	"CpCp13_RS07500"	4	182.08	0	25	0	0.9967873549323018	false	0	"CpCp13_RS08845"	19966	0.17541425818882467
2.327651515151515	0.005594778432571621	0.42961757526444266	0.13779967159277504	195	4	false	"CpCp13_RS02155"	4	72.21142857142857	0	195	20	0.9971752095422308	false	0	"CpCp13_RS08870"	828112	0.05795459756936482
2.412878787878788	5.285909619467928E-5	0.41444270015698587	0.4369369369369369	37	4	false	"CpCp13_RS05445"	4	192.0810810810811	0	37	0	0.9969938749194068	false	0	"CpCp13_RS02080"	25544	0.15835208662908581
2.5426136363636362	0.001676295273021768	0.3932960893854749	0.20945720945720947	97	4	false	"CpCp13_RS09020"	4	72.33333333333333	0	97	19	0.996717843326886	false	0	"CpCp13_RS03680"	244958	0.08135040812206167
2.290246212121212	0.0019587591947310694	0.4366342774446972	0.18311403508771928	114	4	false	"CpCp13_RS03315"	4	91.51041666666667	0	114	18	0.9972547952933591	false	0	"CpCp13_RS07790"	329726	0.06513196915776986
2.3295454545454546	2.1806300131790553E-4	0.4292682926829268	0.39095744680851063	51	4	false	"CpCp13_RS00365"	4	183.45833333333334	0	51	3	0.9971711798839459	false	0	"CpCp13_RS04640"	79628	0.1336185967467832
2.336647727272727	1.262001725832654E-4	0.4279635258358663	0.4336842105263158	76	4	false	"CpCp13_RS07610"	4	221.19736842105263	0	76	0	0.9971560686653771	false	0	"CpCp13_RS06270"	77256	0.1668155116297531
2.2637310606060606	0.0019084919177001858	0.4417485881614725	0.21025111799105606	206	4	false	"CpCp13_RS06410"	4	103.67836257309942	0	206	35	0.9973112105093488	false	0	"CpCp13_RS04145"	501230	0.07485802351848334
2.3740530303030303	7.767202829756447E-5	0.42122058236936577	0.423963133640553	63	4	false	"CpCp13_RS10460"	4	198.0	0	63	0	0.9970764829142489	false	0	"CpCp13_RS06495"	41412	0.15590551181102363
2.350378787878788	0.0014477697780450433	0.4254633360193392	0.2391919191919192	131	3	false	"CpCp13_RS04700"	4	96.72	0	131	31	0.9971268536428111	false	0	"CpCp13_RS07195"	252464	0.0760377358490566
2.6070075757575757	1.8257481979806457E-4	0.3835815474028333	0.3741109530583215	45	4	false	"CpCp13_RS02730"	4	104.34210526315789	0	45	7	0.9965808349451967	false	0	"CpCp13_RS01200"	38592	0.13042763157894738
2.5572916666666665	5.578603009742856E-4	0.39103869653767825	0.3440677966101695	82	4	false	"CpCp13_RS05525"	4	74.1	0	82	22	0.9966866134751773	false	0	"CpCp13_RS09590"	94986	0.08449258836944128
2.659564393939394	1.6397352666462897E-4	0.3760014242478191	0.45883940620782726	46	4	false	"CpCp13_RS07995"	4	93.0	0	46	7	0.9964690119277886	false	0	"CpCp13_RS10590"	28438	0.13187852336788508
2.571496212121212	8.786951511363909E-4	0.38887865954704476	0.21417239555790588	80	4	false	"CpCp13_RS05775"	4	71.3225806451613	0	80	18	0.99665639103804	false	0	"CpCp13_RS01735"	130212	0.08420611646418098
2.6543560606060606	2.0969613899702534E-4	0.37673920799143773	0.4332365747460087	82	4	false	"CpCp13_RS01735"	4	76.05660377358491	0	82	29	0.9964800934880722	false	0	"CpCp13_RS08865"	41234	0.11184794672586015
2.3849431818181817	5.181594518856052E-5	0.41929720071471116	0.4549266247379455	62	4	false	"CpCp13_RS01320"	4	198.61111111111111	0	62	8	0.9970533123791102	false	0	"CpCp13_RS06130"	26238	0.1576278659611993
2.694602272727273	4.5285610982813266E-4	0.3711122825513969	0.2702702702702703	53	4	false	"CpCp13_RS02055"	4	45.08108108108108	0	53	16	0.9963944632495165	false	0	"CpCp13_RS06720"	46640	0.07330257086354647
2.303503787878788	1.592280079314696E-4	0.43412127440904413	0.3704256908140403	114	4	false	"CpCp13_RS05745"	4	170.875	0	114	10	0.9972265876853642	false	0	"CpCp13_RS09490"	67978	0.12427272727272727
2.246685606060606	8.293287992995661E-4	0.445100105374078	0.23387700134670059	188	4	false	"CpCp13_RS06740"	4	120.73780487804878	0	188	24	0.9973474774339136	false	0	"CpCp13_RS03455"	243870	0.08425527207121339
2.397727272727273	5.114474182486986E-5	0.41706161137440756	0.5541165587419057	47	4	false	"CpCp13_RS08795"	4	226.19148936170214	0	47	0	0.9970261121856867	false	0	"CpCp13_RS07375"	27146	0.18300282310817323
2.2769886363636362	2.7110374529471296E-4	0.43917654398003747	0.40328317373461015	91	4	false	"CpCp13_RS01230"	4	163.8139534883721	0	91	5	0.997283002901354	false	0	"CpCp13_RS10890"	145794	0.1134445661276815
2.475852272727273	0.0012697532203599683	0.40390131956397013	0.2462962962962963	105	4	false	"CpCp13_RS02445"	4	78.71604938271605	0	105	24	0.9968598887814314	false	0	"CpCp13_RS00370"	196984	0.0766465914145239
2.368371212121212	6.298326891259925E-4	0.42223110755697724	0.31140350877192985	67	4	false	"CpCp13_RS07775"	4	129.75438596491227	0	67	10	0.9970885718891038	false	0	"CpCp13_RS10645"	114352	0.10121246955141364
2.508522727272727	6.740524068316946E-4	0.3986409966024915	0.26936026936026936	75	4	false	"CpCp13_RS10300"	5	69.47272727272727	0	75	20	0.9967903771760155	false	0	"CpCp13_RS09930"	96868	0.07053068758652516
2.396780303030303	1.937038935845197E-4	0.41722639273014617	0.41833077316948286	71	4	false	"CpCp13_RS10410"	5	151.4920634920635	0	71	8	0.9970281270148291	false	0	"CpCp13_RS07605"	68554	0.12407212407212408
2.243844696969697	2.3527387379702165E-4	0.44566364211859044	0.40721153846153846	67	4	false	"CpCp13_RS00125"	5	192.01538461538462	0	67	2	0.9973535219213411	false	0	"CpCp13_RS05700"	141346	0.12525465402177732
2.4105113636363638	2.3895036295878776E-4	0.4148497348261638	0.38823529411764707	51	4	false	"CpCp13_RS04020"	5	135.11764705882354	0	51	0	0.996998911992263	false	0	"CpCp13_RS08235"	69710	0.11259803921568627
2.175189393939394	0.004597813175517089	0.45973008271658683	0.2132088520055325	294	3	false	"CpCp13_RS04180"	5	109.68879668049793	0	294	53	0.9974995970341716	false	0	"CpCp13_RS00630"	1170432	0.07307714635609455
2.3484848484848486	7.492950560008962E-4	0.4258064516129032	0.3310734463276836	60	4	false	"CpCp13_RS08055"	5	126.1	0	60	0	0.997130883301096	false	0	"CpCp13_RS07530"	177698	0.0956752655538695
2.290719696969697	3.3479373773512907E-4	0.43654402645721374	0.2978723404255319	48	4	false	"CpCp13_RS10525"	5	136.9375	0	48	0	0.9972537878787879	false	0	"CpCp13_RS07510"	102620	0.09437456926257753
2.2481060606060606	3.9679108256829326E-4	0.4448188711036226	0.36149068322981365	70	4	false	"CpCp13_RS06710"	5	198.84285714285716	0	70	0	0.9973444551901999	false	0	"CpCp13_RS00635"	172378	0.13073166150089227
2.212594696969697	0.0016452711623833702	0.4519580569227477	0.20003797228023543	266	4	false	"CpCp13_RS01060"	5	117.3391304347826	0	266	36	0.9974200112830433	false	0	"CpCp13_RS02535"	400134	0.08165562312789326
2.0132575757575757	0.010481899964221011	0.49670743179680155	0.12060971737059384	531	3	false	"CpCp13_RS06070"	5	96.29574468085106	0	531	61	0.9978441328175371	false	0	"CpCp13_RS10085"	2120232	0.05966279100424477
2.3882575757575757	1.0423574657570734E-4	0.41871530531324347	0.45493042952208107	62	4	false	"CpCp13_RS02430"	5	186.70689655172413	0	62	4	0.9970462604771115	false	0	"CpCp13_RS01945"	49486	0.15057007786429366
2.4228219696969697	1.286252574582422E-4	0.41274184092241545	0.44387755102040816	49	4	false	"CpCp13_RS05425"	5	166.3673469387755	0	49	0	0.9969727192134107	false	0	"CpCp13_RS06335"	51524	0.141211323238973
2.5639204545454546	2.9538593379817556E-4	0.39002770083102495	0.28307692307692306	34	4	false	"CpCp13_RS07330"	5	81.84615384615384	0	34	8	0.9966725096711799	false	0	"CpCp13_RS07785"	38468	0.09114271029638513
2.6889204545454546	9.49290054348369E-4	0.3718964606444797	0.24313725490196078	69	4	false	"CpCp13_RS02250"	5	49.705882352941174	0	69	18	0.9964065522243714	false	0	"CpCp13_RS07120"	125134	0.08172084623323013
2.4195075757575757	0.0014210278145736592	0.413307240704501	0.33480753480753483	156	4	false	"CpCp13_RS00845"	5	97.95495495495496	0	156	45	0.9969797711154095	false	0	"CpCp13_RS10115"	252082	0.08777325712809583
2.256628787878788	3.0153658806585066E-4	0.4431389005455308	0.37657657657657656	75	4	false	"CpCp13_RS04150"	5	188.32	0	75	0	0.9973263217279175	false	0	"CpCp13_RS06485"	177014	0.12588235294117647
2.512310606060606	7.02699005579075E-4	0.398039954768187	0.28656462585034015	64	4	false	"CpCp13_RS04925"	5	72.46938775510205	0	64	15	0.9967823178594455	false	0	"CpCp13_RS00060"	112176	0.07312753557527955
2.274621212121212	7.870158600626004E-4	0.4396336386344713	0.2743055555555556	67	3	false	"CpCp13_RS04405"	5	140.28125	0	67	3	0.9972880399742102	false	0	"CpCp13_RS07285"	209274	0.09555943460490464
2.456912878787879	0.0010440110127736364	0.4070148390826749	0.22966507177033493	97	4	false	"CpCp13_RS01805"	5	70.62337662337663	0	97	20	0.9969001853642812	false	0	"CpCp13_RS08260"	170312	0.06594152812640208
2.4739583333333335	9.396770016198429E-4	0.40421052631578946	0.2558922558922559	81	3	false	"CpCp13_RS08940"	5	65.4	0	81	26	0.9968639184397163	false	0	"CpCp13_RS01320"	124784	0.061931818181818185
2.3333333333333335	4.897212467964947E-4	0.42857142857142855	0.35032279986408427	140	4	false	"CpCp13_RS06885"	5	142.77981651376146	0	140	31	0.9971631205673759	false	0	"CpCp13_RS06685"	144162	0.10974620792756454
2.1898674242424243	0.003851728134219333	0.4566486486486486	0.1367463602827293	294	3	false	"CpCp13_RS02630"	5	97.16479400749064	0	294	27	0.9974683671824629	false	0	"CpCp13_RS06560"	736798	0.06728863850934255
2.4507575757575757	1.0917855217625904E-4	0.4080370942812983	0.39327731092436974	36	4	false	"CpCp13_RS09980"	5	149.94285714285715	0	36	1	0.9969132817537073	false	0	"CpCp13_RS06580"	38596	0.13269279393173197
2.6988636363636362	8.558639200920939E-5	0.3705263157894737	0.4817204301075269	31	4	false	"CpCp13_RS05625"	5	100.61290322580645	0	31	0	0.9963853965183752	false	0	"CpCp13_RS07095"	19002	0.16072348758116048
2.5913825757575757	1.667464088007726E-4	0.3858943906449845	0.5032467532467533	77	4	false	"CpCp13_RS04065"	5	111.69642857142857	0	77	21	0.9966140796260478	false	0	"CpCp13_RS03045"	39530	0.1372191997191997
2.4706439393939394	4.385434002172729E-5	0.40475277884246835	0.4855072463768116	24	4	false	"CpCp13_RS10170"	5	247.08333333333334	0	24	0	0.996870970341715	false	0	"CpCp13_RS00380"	22142	0.22021687462863934
2.4706439393939394	3.1090028348740024E-4	0.40475277884246835	0.4378199337548931	112	4	false	"CpCp13_RS02460"	5	110.29268292682927	0	112	30	0.996870970341715	false	0	"CpCp13_RS00505"	93450	0.10605065666041276
2.1676136363636362	0.002567996005980263	0.4613368283093054	0.2176417776447703	197	3	false	"CpCp13_RS01765"	5	120.6829268292683	0	197	33	0.9975157156673115	false	0	"CpCp13_RS00065"	667998	0.07571074456039416
2.491950757575758	6.109553373606505E-5	0.4012920387611628	0.42063492063492064	28	4	false	"CpCp13_RS07395"	5	167.0	0	28	0	0.996825636686009	false	0	"CpCp13_RS00700"	20574	0.1560747663551402
2.325284090909091	0.0025292992497852897	0.4300549786194258	0.18744489508023277	124	4	false	"CpCp13_RS02575"	5	95.35514018691589	0	124	17	0.9971802466150871	false	0	"CpCp13_RS08090"	406508	0.07207493589336046
2.262784090909091	0.004388432474171474	0.44193345888261143	0.1572460688482788	210	4	false	"CpCp13_RS09465"	5	98.04395604395604	0	210	28	0.9973132253384913	false	0	"CpCp13_RS01495"	735384	0.07120113002465944
2.3645833333333335	1.1984521043898811E-4	0.4229074889867841	0.3879492600422833	44	4	false	"CpCp13_RS04330"	5	176.25	0	44	0	0.9970966312056738	false	0	"CpCp13_RS10345"	55402	0.13536866359447006
2.662405303030303	7.687195688976955E-4	0.3756002134092121	0.16302521008403362	45	4	false	"CpCp13_RS06380"	5	43.05714285714286	0	45	10	0.996462967440361	false	0	"CpCp13_RS05240"	80644	0.06347330660476894
2.7320075757575757	5.397986288232093E-4	0.3660311958405546	0.21379310344827587	38	4	false	"CpCp13_RS07650"	5	36.53333333333333	0	38	8	0.9963148774983882	false	0	"CpCp13_RS10840"	49308	0.06746765249537892
2.4322916666666665	0.001183481257904824	0.411134903640257	0.231203007518797	75	3	false	"CpCp13_RS07420"	5	69.0701754385965	0	75	18	0.9969525709219857	false	0	"CpCp13_RS02800"	163254	0.06048176483239623
2.6292613636363638	3.488560712639496E-4	0.38033495407887624	0.3274745605920444	59	4	false	"CpCp13_RS01410"	5	90.06382978723404	0	59	12	0.9965334864603481	false	0	"CpCp13_RS08935"	55762	0.11976573110004526
2.3110795454545454	2.63673412654422E-4	0.4326982175783651	0.45799457994579945	82	4	false	"CpCp13_RS00490"	5	173.5121951219512	0	82	0	0.9972104690522243	false	0	"CpCp13_RS10005"	140162	0.12628252920083785
2.406723484848485	2.1095935785966585E-4	0.4155026559118631	0.41493506493506493	67	4	false	"CpCp13_RS07020"	5	131.07142857142858	0	67	11	0.997006971308833	false	0	"CpCp13_RS01025"	79188	0.1087729697688204
2.706912878787879	2.8569901709252134E-4	0.3694245233514081	0.36257928118393234	69	4	false	"CpCp13_RS10120"	5	54.25	0	69	25	0.9963682704706641	false	0	"CpCp13_RS05785"	47394	0.09011627906976744
2.195549242424242	0.005109285820872227	0.45546689670045293	0.14038239880669875	386	3	false	"CpCp13_RS00035"	5	90.59593023255815	0	386	42	0.997456278207608	false	0	"CpCp13_RS08190"	948920	0.06686046511627906
2.378787878787879	1.2769473785944572E-4	0.4203821656050955	0.4297752808988764	102	4	false	"CpCp13_RS08530"	5	175.40449438202248	0	102	13	0.9970664087685365	false	0	"CpCp13_RS01310"	48386	0.1412274511932548
2.8806818181818183	3.302680459465982E-5	0.34714003944773175	0.4485294117647059	25	4	false	"CpCp13_RS01120"	5	54.411764705882355	0	25	8	0.9959985493230175	false	0	"CpCp13_RS00820"	4268	0.1450980392156863
2.5956439393939394	0.0012194021423353675	0.3852608537030281	0.17037037037037037	71	4	false	"CpCp13_RS06090"	5	51.4	0	71	16	0.9966050128949066	false	0	"CpCp13_RS04075"	130514	0.06416978776529339
2.3570075757575757	2.366679563649773E-4	0.42426677380474087	0.38076923076923075	65	4	false	"CpCp13_RS02150"	5	161.15384615384616	0	65	0	0.9971127498388137	false	0	"CpCp13_RS07255"	88394	0.12444312444312444
2.3106060606060606	0.0013035330034803214	0.43278688524590164	0.28256018790369936	161	4	false	"CpCp13_RS01510"	5	105.37404580152672	0	161	30	0.9972114764667956	false	0	"CpCp13_RS03165"	322114	0.07940772102601863
2.319128787878788	0.002865986806665476	0.4311964066966108	0.19336051252184042	131	4	false	"CpCp13_RS02775"	5	83.47058823529412	0	131	29	0.9971933430045131	false	0	"CpCp13_RS01185"	422268	0.06243125522460293
2.443655303030303	1.3955046459997948E-4	0.40922301879480716	0.41219158200290273	62	4	false	"CpCp13_RS02905"	5	142.33962264150944	0	62	9	0.996928392972276	false	0	"CpCp13_RS06250"	41360	0.12496893998376596
2.424715909090909	7.269887485052363E-4	0.4124194493263034	0.2224310776942356	70	4	false	"CpCp13_RS00465"	5	86.56140350877193	0	70	13	0.9969686895551256	false	0	"CpCp13_RS07740"	119538	0.0744783645861642
2.3707386363636362	5.828070837692812E-4	0.42180946674655484	0.38095238095238093	109	4	false	"CpCp13_RS09580"	5	105.38823529411765	0	109	24	0.9970835348162476	false	0	"CpCp13_RS00390"	159424	0.08444570135746607
2.289772727272727	0.001482484099773948	0.43672456575682383	0.2890009842519685	156	4	false	"CpCp13_RS06280"	5	107.15625	0	156	28	0.9972558027079303	false	0	"CpCp13_RS02665"	381500	0.07804533867443554
2.633522727272727	3.0436910393812555E-4	0.37971952535059333	0.3243589743589744	58	4	false	"CpCp13_RS00120"	5	71.925	0	58	18	0.9965244197292069	false	0	"CpCp13_RS03060"	40220	0.09680349932705248
2.241003787878788	0.0019276064424072182	0.4462286076484259	0.1527713088029809	133	4	false	"CpCp13_RS01075"	5	97.36842105263158	0	133	19	0.9973595664087684	false	0	"CpCp13_RS06215"	344856	0.06530410533375693
2.412878787878788	3.360069023159364E-4	0.41444270015698587	0.3623714458560194	58	4	false	"CpCp13_RS08665"	5	132.98275862068965	0	58	0	0.9969938749194068	false	0	"CpCp13_RS06110"	89506	0.11203265258693315
2.3915719696969697	0.001526846504901083	0.41813502276776876	0.3303834808259587	153	3	false	"CpCp13_RS08195"	5	114.99122807017544	0	153	39	0.9970392085751127	false	0	"CpCp13_RS05470"	296544	0.09819917000014981
2.315340909090909	8.932689693202823E-5	0.43190184049079755	0.43799603174603174	64	4	false	"CpCp13_RS00395"	5	216.515625	0	64	0	0.9972014023210831	false	0	"CpCp13_RS06455"	51954	0.15644192557803469
2.037878787878788	0.008125724534881364	0.4907063197026022	0.13641810193534332	453	4	false	"CpCp13_RS09995"	5	102.07616707616708	0	453	46	0.9977917472598323	false	0	"CpCp13_RS09025"	1818728	0.06273888572597854
2.527462121212121	1.6577039291639455E-4	0.3956538029224429	0.46153846153846156	62	4	false	"CpCp13_RS03915"	5	124.92307692307692	0	62	10	0.9967500805931657	false	0	"CpCp13_RS07845"	43840	0.12958825406958188
2.2481060606060606	0.0021673686230656818	0.4448188711036226	0.18989212354071228	230	4	false	"CpCp13_RS10665"	5	105.76732673267327	0	230	28	0.9973444551901999	false	0	"CpCp13_RS04375"	465858	0.07620124404371273
2.1505681818181817	0.0051076953818952045	0.464993394980185	0.1346085912109651	384	3	false	"CpCp13_RS07060"	5	94.89020771513353	0	384	47	0.9975519825918762	false	0	"CpCp13_RS10550"	1063746	0.06512711579624814
2.3806818181818183	1.4783832949675338E-4	0.4200477326968973	0.46230274693161894	67	4	false	"CpCp13_RS08875"	5	160.91525423728814	0	67	8	0.9970623791102514	false	0	"CpCp13_RS08445"	63074	0.12852656089240266
2.359375	0.003235627404524257	0.423841059602649	0.1976401179941003	159	3	false	"CpCp13_RS01790"	5	67.15789473684211	0	159	45	0.9971077127659574	false	0	"CpCp13_RS07305"	469436	0.054203304872350366
2.2679924242424243	0.001775595037686759	0.44091858037578285	0.23717948717948717	177	4	false	"CpCp13_RS05890"	5	116.95138888888889	0	177	33	0.9973021437782076	false	0	"CpCp13_RS08475"	323530	0.08335808188801774
2.303030303030303	2.3256945728513596E-4	0.43421052631578944	0.37595959595959594	114	4	false	"CpCp13_RS03245"	5	195.12	0	114	14	0.9972275950999355	false	0	"CpCp13_RS08310"	109866	0.14200873362445415
2.280776515151515	1.7367874767693054E-4	0.43844716628607017	0.36470588235294116	51	4	false	"CpCp13_RS06315"	5	202.2156862745098	0	51	0	0.9972749435847841	false	0	"CpCp13_RS05480"	95248	0.13728152496572288
2.2490530303030303	1.469441003587223E-4	0.44463157894736843	0.4222222222222222	84	4	false	"CpCp13_RS03225"	5	210.23456790123456	0	84	3	0.9973424403610575	false	0	"CpCp13_RS06150"	99658	0.13922819066306924
2.0525568181818183	0.007000394426104143	0.48719723183391	0.1399051490514905	416	4	false	"CpCp13_RS03150"	5	105.00542005420054	0	416	47	0.9977605174081238	false	0	"CpCp13_RS00235"	1657274	0.06426280297074696
2.261837121212121	6.601948062153745E-4	0.44211848440443796	0.27155635062611805	159	4	false	"CpCp13_RS03855"	5	136.25384615384615	0	159	29	0.9973152401676337	false	0	"CpCp13_RS00595"	195970	0.09528240989779452
2.4820075757575757	2.5975786776159224E-4	0.40289965661961086	0.4004524886877828	52	4	false	"CpCp13_RS02845"	5	132.07692307692307	0	52	0	0.9968467923920051	false	0	"CpCp13_RS03790"	65496	0.1263894000736106
2.4834280303030303	0.0013061432741486095	0.4026692087702574	0.25063094544748593	122	3	false	"CpCp13_RS09145"	5	86.49019607843137	0	122	20	0.9968437701482915	false	0	"CpCp13_RS00555"	207858	0.0874521699478578
2.492424242424242	3.144613439437415E-4	0.4012158054711247	0.38010204081632654	49	4	false	"CpCp13_RS09360"	5	84.06122448979592	0	49	0	0.9968246292714378	false	0	"CpCp13_RS10785"	66860	0.08193101802124358
2.663352272727273	1.9083839404803675E-4	0.3754666666666666	0.4318181818181818	44	4	false	"CpCp13_RS03595"	5	88.36363636363636	0	44	11	0.9964609526112186	false	0	"CpCp13_RS03450"	30286	0.12605368953443133
2.5203598484848486	3.586171770839285E-4	0.39676873943265073	0.3310344827586207	30	4	false	"CpCp13_RS04175"	5	114.93333333333334	0	30	0	0.9967651918117343	false	0	"CpCp13_RS09720"	55758	0.1160942760942761
2.456439393939394	5.938179231783021E-4	0.4070932922127988	0.28888888888888886	55	4	false	"CpCp13_RS03195"	5	89.9090909090909	0	55	0	0.9969011927788524	false	0	"CpCp13_RS05260"	115614	0.0821838125311617
2.2604166666666665	0.004283340792560364	0.4423963133640553	0.17087492660011744	173	3	false	"CpCp13_RS02065"	5	72.78625954198473	0	173	42	0.9973182624113475	false	0	"CpCp13_RS08200"	651910	0.050863913027243
2.398200757575758	0.0013819049947650511	0.4169792694965449	0.2696277760400375	177	3	false	"CpCp13_RS03605"	5	98.73381294964028	0	177	38	0.9970251047711154	false	0	"CpCp13_RS09605"	304842	0.08722068281770344
2.284090909090909	0.002537216261917308	0.43781094527363185	0.25924698081932274	258	3	false	"CpCp13_RS07955"	5	103.5631067961165	0	258	52	0.9972678916827853	false	0	"CpCp13_RS07350"	592398	0.07929793782244755
2.285037878787879	8.483598682767738E-5	0.43762950683796104	0.4211309523809524	64	4	false	"CpCp13_RS09375"	5	247.15625	0	64	0	0.9972658768536428	false	0	"CpCp13_RS09775"	67872	0.16998366574965612
2.5009469696969697	2.3933467001050184E-4	0.39984854221885646	0.47574517825832846	70	4	false	"CpCp13_RS06990"	5	134.5084745762712	0	70	11	0.9968064958091554	false	0	"CpCp13_RS09985"	62598	0.1347780306375463
2.231060606060606	0.0014130804214372338	0.44821731748726656	0.2410024364775496	210	4	false	"CpCp13_RS10135"	5	126.32941176470588	0	210	40	0.9973807221147646	false	0	"CpCp13_RS00660"	366438	0.08676470588235294
2.277462121212121	8.918718921348841E-4	0.4390852390852391	0.3848454636091725	146	4	false	"CpCp13_RS07300"	5	138.52100840336135	0	146	27	0.9972819954867828	false	0	"CpCp13_RS02790"	318140	0.09831157445235014
2.507575757575758	3.2002192631792333E-4	0.39879154078549844	0.348984348984349	90	4	false	"CpCp13_RS01990"	5	107.51282051282051	0	90	12	0.996792392005158	false	0	"CpCp13_RS00340"	82680	0.11129691564474173
2.6676136363636362	1.9518271381224883E-4	0.37486687965921195	0.44871794871794873	48	4	false	"CpCp13_RS06165"	5	74.475	0	48	8	0.9964518858800774	false	0	"CpCp13_RS09240"	40328	0.10984513274336283
2.444128787878788	0.0012495031895191884	0.40914374273537385	0.20266889074228525	125	4	false	"CpCp13_RS03120"	5	68.0909090909091	0	125	15	0.9969273855577047	false	0	"CpCp13_RS10090"	243906	0.06381528499616597
2.3020833333333335	0.002016371120602015	0.43438914027149317	0.247942540775101	205	4	false	"CpCp13_RS07560"	5	101.59756097560975	0	205	41	0.997229609929078	false	0	"CpCp13_RS10150"	485342	0.07749623262823017
2.339962121212121	9.025858537042755E-4	0.42735734520437074	0.2843167701863354	185	4	false	"CpCp13_RS09030"	5	111.75776397515529	0	185	24	0.9971490167633784	false	0	"CpCp13_RS03080"	298362	0.09056544892638191
2.3068181818181817	0.0020801021304365057	0.43349753694581283	0.21707187760357494	193	3	false	"CpCp13_RS04740"	5	105.79754601226993	0	193	30	0.9972195357833655	false	0	"CpCp13_RS02990"	409192	0.08132017372195999
2.112215909090909	0.0030407368896755893	0.4734364492266308	0.1713053547897616	353	4	false	"CpCp13_RS10650"	5	113.6372239747634	0	353	36	0.9976335831721469	false	0	"CpCp13_RS09845"	821710	0.07289109940651918
2.3887310606060606	2.556875593822118E-5	0.4186323092170466	0.4975541579315164	54	4	false	"CpCp13_RS10195"	5	249.92592592592592	0	54	0	0.9970452530625403	false	0	"CpCp13_RS06190"	19056	0.1993029712327958
2.2855113636363638	2.3426339782938292E-4	0.437538844002486	0.381340244353943	74	4	false	"CpCp13_RS01870"	5	217.09459459459458	0	74	0	0.9972648694390716	false	0	"CpCp13_RS09115"	105314	0.1510748744569204
2.303977272727273	1.1774804799642069E-4	0.43403205918618987	0.44242424242424244	73	4	false	"CpCp13_RS09955"	5	214.8939393939394	0	73	7	0.9972255802707931	false	0	"CpCp13_RS06505"	57858	0.15262353650137742
2.265151515151515	5.371989000293109E-4	0.4414715719063545	0.4823194689066522	150	4	false	"CpCp13_RS10295"	5	145.61475409836066	0	150	28	0.997308188265635	false	0	"CpCp13_RS07570"	216602	0.10175734039018913
2.334753787878788	8.724496258552986E-5	0.42831068748732504	0.45856019358741684	58	4	false	"CpCp13_RS08995"	5	220.3793103448276	0	58	0	0.9971600983236621	false	0	"CpCp13_RS07585"	48840	0.16336494465887885
2.315340909090909	1.660585858477276E-4	0.43190184049079755	0.396969696969697	45	4	false	"CpCp13_RS04580"	5	194.0	0	45	0	0.9972014023210831	false	0	"CpCp13_RS00680"	82228	0.13807829181494663
2.499526515151515	0.0010816808748408055	0.40007577192650123	0.2838935574229692	151	4	false	"CpCp13_RS04820"	5	94.15	0	151	31	0.9968095180528691	false	0	"CpCp13_RS03090"	231850	0.09984093319194061
2.424715909090909	2.586938042199472E-4	0.4124194493263034	0.5250515767757147	158	3	false	"CpCp13_RS05520"	5	130.52991452991452	0	158	41	0.9969686895551256	false	0	"CpCp13_RS03370"	112596	0.11887970357915713
2.3125	2.9156801571849966E-4	0.43243243243243246	0.36145592257521564	105	4	false	"CpCp13_RS10240"	5	164.12244897959184	0	105	7	0.9972074468085106	false	0	"CpCp13_RS08965"	99350	0.12085600072134892
2.550662878787879	7.523030012635256E-4	0.392054947094858	0.2734006734006734	76	4	false	"CpCp13_RS10265"	5	68.49090909090908	0	76	21	0.9967007172791748	false	0	"CpCp13_RS04865"	123748	0.07652615540883698
2.371212121212121	9.826867167558298E-4	0.42172523961661346	0.22056631892697467	151	4	false	"CpCp13_RS02005"	5	105.8688524590164	0	151	29	0.9970825274016764	false	0	"CpCp13_RS07425"	169736	0.08771238811848914
2.320549242424242	0.0017052890347722142	0.43093246276270153	0.2487041150957368	181	3	false	"CpCp13_RS05665"	5	100.43478260869566	0	181	43	0.9971903207607995	false	0	"CpCp13_RS00290"	365960	0.07743622406221716
2.171875	0.003963410044987205	0.460431654676259	0.17284252578370227	253	4	false	"CpCp13_RS07940"	5	103.22522522522523	0	253	31	0.9975066489361702	false	0	"CpCp13_RS09620"	1005546	0.06751159269144881
2.1538825757575757	0.004407499829636156	0.46427786326665205	0.15767705989499625	346	4	false	"CpCp13_RS06895"	5	104.79411764705883	0	346	40	0.9975449306898775	false	0	"CpCp13_RS03145"	951480	0.07066359922256157
2.7050189393939394	1.4073695750238503E-4	0.3696831787152109	0.39492753623188404	30	4	false	"CpCp13_RS05160"	5	58.291666666666664	0	30	6	0.9963723001289491	false	0	"CpCp13_RS01535"	20558	0.0923798203909139
2.5634469696969697	0.0014359831193414292	0.3900997414111563	0.15761689291101055	62	4	false	"CpCp13_RS01880"	5	44.98076923076923	0	62	10	0.996673517085751	false	0	"CpCp13_RS03960"	135028	0.051465411019186766
2.453598484848485	0.0028663313851660342	0.40756464685449634	0.18857712576556046	148	4	false	"CpCp13_RS04350"	5	72.10084033613445	0	148	29	0.9969072372662798	false	0	"CpCp13_RS02440"	431014	0.06952829347746814
2.3773674242424243	3.767422794855023E-4	0.4206333399721171	0.3294685990338164	46	3	false	"CpCp13_RS06445"	5	139.93478260869566	0	46	0	0.9970694310122501	false	0	"CpCp13_RS08880"	94088	0.11027169630314866
2.4517045454545454	0.0015337644267249995	0.4078794901506373	0.21262699564586357	63	4	false	"CpCp13_RS04460"	5	76.60377358490567	0	63	10	0.9969112669245648	false	0	"CpCp13_RS09370"	146184	0.0691994341327061
2.3963068181818183	5.898902055873192E-5	0.41730883224659154	0.5201298701298701	61	4	false	"CpCp13_RS07135"	5	176.55357142857142	0	61	5	0.9970291344294004	false	0	"CpCp13_RS05435"	40124	0.1433064703153989
2.2959280303030303	3.5303088569342247E-4	0.4355537224169932	0.3810126582278481	80	4	false	"CpCp13_RS08495"	5	185.275	0	80	0	0.9972427063185042	false	0	"CpCp13_RS02055"	142798	0.13149396735273244
2.511837121212121	4.2598632075012383E-4	0.39811498586239397	0.3810637054354179	84	4	false	"CpCp13_RS08630"	5	104.98305084745763	0	84	25	0.9967833252740168	false	0	"CpCp13_RS07870"	79444	0.10636580632974431
2.531723484848485	4.3926125028527176E-5	0.3949878436506452	0.43304843304843305	27	4	false	"CpCp13_RS03260"	5	151.7037037037037	0	27	0	0.9967410138620245	false	0	"CpCp13_RS07575"	16872	0.15277311551228973
2.445075757575758	6.048899177356934E-4	0.40898528272656853	0.43119923554706163	118	4	false	"CpCp13_RS02700"	5	116.96739130434783	0	118	26	0.9969253707285622	false	0	"CpCp13_RS03725"	161176	0.10810294944948967
2.484848484848485	4.959515584481551E-4	0.4024390243902439	0.38747474747474747	128	4	false	"CpCp13_RS05125"	5	115.25	0	128	28	0.9968407479045777	false	0	"CpCp13_RS03995"	127132	0.11653185035389282
2.3229166666666665	9.982068095601632E-4	0.4304932735426009	0.3084985190248348	167	4	false	"CpCp13_RS06980"	5	123.69924812030075	0	167	34	0.9971852836879432	false	0	"CpCp13_RS03340"	291590	0.09529988298944587
2.327651515151515	2.6640347183510855E-4	0.42961757526444266	0.43386075949367087	80	4	false	"CpCp13_RS01390"	5	171.7	0	80	0	0.9971752095422308	false	0	"CpCp13_RS05745"	136140	0.12803877703206562
2.378787878787879	8.570735376046705E-4	0.4203821656050955	0.24757408864411226	142	4	false	"CpCp13_RS04235"	5	103.53225806451613	0	142	18	0.9970664087685365	false	0	"CpCp13_RS02050"	200974	0.08707506986082096
2.674715909090909	3.4325602281189664E-4	0.37387148167817313	0.3139784946236559	32	4	false	"CpCp13_RS00530"	5	71.58064516129032	0	32	1	0.9964367746615086	false	0	"CpCp13_RS10855"	40650	0.10620273762802719
2.3896780303030303	7.095316668509881E-5	0.4184664156924906	0.47692307692307695	65	4	false	"CpCp13_RS00850"	5	202.96923076923076	0	65	0	0.9970432382333979	false	0	"CpCp13_RS04250"	38078	0.1648815847028682
2.340435606060606	7.572677693021668E-5	0.4272708881246207	0.4422262552934059	58	4	false	"CpCp13_RS07920"	5	234.51724137931035	0	58	0	0.9971480093488072	false	0	"CpCp13_RS10885"	45338	0.17475204275656508
2.1425189393939394	0.005150527792579428	0.4667403314917127	0.1332928562966473	399	4	false	"CpCp13_RS01505"	5	96.97010869565217	0	399	31	0.9975691086395874	false	0	"CpCp13_RS07695"	1052938	0.06715381488618571
2.3617424242424243	0.0015639387518652083	0.4234161988773055	0.18606825619448342	113	4	false	"CpCp13_RS10780"	5	77.76344086021506	0	113	20	0.9971026756931012	false	0	"CpCp13_RS05875"	254190	0.06191356756386549
2.141098484848485	0.005604632576674205	0.4670499778858912	0.12449512948443811	211	3	false	"CpCp13_RS03545"	5	84.4836956521739	0	211	27	0.9975721308833011	false	0	"CpCp13_RS10250"	928914	0.051830488130168044
2.433712121212121	4.1607886819883044E-4	0.4108949416342413	0.32784313725490194	66	4	false	"CpCp13_RS09545"	5	95.03921568627452	0	66	15	0.9969495486782721	false	0	"CpCp13_RS03410"	89362	0.08285895003162555
2.3963068181818183	0.0033381452258810537	0.41730883224659154	0.17575843896880786	144	3	false	"CpCp13_RS04810"	5	66.97478991596638	0	144	25	0.9970291344294004	false	0	"CpCp13_RS03865"	425850	0.05793666947747957
2.3854166666666665	1.9806792897641737E-4	0.41921397379912667	0.3310924369747899	35	4	false	"CpCp13_RS00975"	5	150.42857142857142	0	35	0	0.997052304964539	false	0	"CpCp13_RS06745"	53818	0.11882193635748138
2.280776515151515	2.2254932304130188E-4	0.43844716628607017	0.3490623109497883	58	4	false	"CpCp13_RS09105"	5	187.79310344827587	0	58	0	0.9972749435847841	false	0	"CpCp13_RS02405"	108894	0.1284494551629794
2.3603219696969697	7.327974958672842E-5	0.42367101303911736	0.45528846153846153	65	4	false	"CpCp13_RS06135"	5	216.01538461538462	0	65	0	0.9971056979368149	false	0	"CpCp13_RS02785"	45880	0.16771380793119925
2.414299242424242	0.00137292623130239	0.41419886252206317	0.25124521072796935	184	3	false	"CpCp13_RS08500"	5	93.95862068965518	0	184	39	0.9969908526756931	false	0	"CpCp13_RS04550"	313922	0.08604269293924466
2.382575757575758	9.470065526793561E-4	0.4197138314785373	0.2529731566428814	130	4	false	"CpCp13_RS06500"	5	102.34862385321101	0	130	21	0.9970583494519665	false	0	"CpCp13_RS07435"	214804	0.08536165458983404
2.3948863636363638	0.0021351879252726204	0.41755634638196915	0.21371610845295055	165	4	false	"CpCp13_RS01090"	5	93.203007518797	0	165	32	0.9970321566731141	false	0	"CpCp13_RS01570"	399834	0.08132897689249301
2.390625	0.0017948349960106318	0.41830065359477125	0.2522359821121431	175	4	false	"CpCp13_RS03925"	5	97.07843137254902	0	175	22	0.9970412234042553	false	0	"CpCp13_RS00175"	354772	0.08545636564484949
2.382102272727273	5.671854990006674E-5	0.4197972570065593	0.47451923076923075	65	4	false	"CpCp13_RS06935"	5	224.2153846153846	0	65	0	0.9970593568665378	false	0	"CpCp13_RS07110"	33908	0.1786576769843702
2.196496212121212	7.802269728130372E-4	0.45527053244233673	0.30027988804478206	141	4	false	"CpCp13_RS04570"	5	153.6829268292683	0	141	18	0.9974542633784655	false	0	"CpCp13_RS08085"	304514	0.0974527120033407
2.336174242424242	6.160204967439697E-5	0.4280502634779084	0.41932367149758454	46	4	false	"CpCp13_RS09925"	5	204.97826086956522	0	46	0	0.9971570760799484	false	0	"CpCp13_RS03285"	45446	0.1489667593528817
2.0767045454545454	0.0091582169345549	0.48153214774281805	0.12055472645870491	367	4	false	"CpCp13_RS00565"	5	94.34638554216868	0	367	35	0.9977091392649903	false	0	"CpCp13_RS04515"	1880676	0.05823850959393128
2.3380681818181817	1.9906258431214347E-4	0.4277035236938032	0.49918857513794224	90	4	false	"CpCp13_RS06985"	5	164.0632911392405	0	90	11	0.9971530464216635	false	0	"CpCp13_RS04990"	106960	0.12400853449678043
2.5260416666666665	2.0610291248548515E-4	0.39587628865979385	0.4166666666666667	40	4	false	"CpCp13_RS01050"	5	119.85	0	40	0	0.9967531028368793	false	0	"CpCp13_RS10060"	43722	0.12419689119170985
2.450284090909091	0.001527086026284383	0.40811594202898555	0.27636363636363637	129	3	false	"CpCp13_RS08440"	5	91.57	0	129	29	0.9969142891682786	false	0	"CpCp13_RS05990"	269650	0.08630537229029217
2.2386363636363638	0.0017262309709440715	0.44670050761421315	0.23745214061956144	215	4	false	"CpCp13_RS09890"	5	122.93529411764706	0	215	45	0.9973646034816247	false	0	"CpCp13_RS06755"	417604	0.08543105915055389
2.3892045454545454	2.40220444409169E-4	0.41854934601664684	0.3750841750841751	72	4	false	"CpCp13_RS10440"	5	116.8	0	72	17	0.997044245647969	false	0	"CpCp13_RS00425"	67146	0.09442198868229587
2.4351325757575757	3.0677311936261044E-4	0.4106552595761229	0.5006864988558353	145	3	false	"CpCp13_RS06200"	5	132.57391304347826	0	145	30	0.9969465264345584	false	0	"CpCp13_RS05455"	110008	0.12298136645962733
2.179450757575758	0.002028782616883388	0.45883119704540515	0.18919145370758275	184	4	false	"CpCp13_RS01315"	5	112.16129032258064	0	184	29	0.9974905303030304	false	0	"CpCp13_RS00765"	477084	0.07103311610043106
2.1103219696969697	0.005973376060037425	0.4738613417096702	0.1891025641025641	327	3	false	"CpCp13_RS09070"	5	109.47985347985347	0	327	54	0.997637612830432	false	0	"CpCp13_RS06625"	1615432	0.0681692736487257
2.399621212121212	6.654536804447182E-5	0.4167324388318864	0.45314009661835747	46	4	false	"CpCp13_RS08075"	5	200.7826086956522	0	46	0	0.9970220825274018	false	0	"CpCp13_RS02660"	32072	0.16350375300948874
2.4578598484848486	7.730526937627152E-4	0.40685802350221534	0.31550632911392407	102	4	false	"CpCp13_RS04620"	5	102.5625	0	102	22	0.9968981705351385	false	0	"CpCp13_RS05135"	138476	0.09603230337078651
2.086174242424242	0.008809476509484205	0.47934634589196556	0.14518786417520596	368	3	false	"CpCp13_RS07655"	5	97.9367088607595	0	368	52	0.9976889909735654	false	0	"CpCp13_RS04495"	2085630	0.06067949743541481
2.445549242424242	8.207099541742023E-4	0.40890609874152956	0.2649122807017544	93	4	false	"CpCp13_RS08295"	5	79.69736842105263	0	93	17	0.9969243633139909	false	0	"CpCp13_RS00890"	165942	0.0726502902653169
2.2679924242424243	0.003574113624051873	0.44091858037578285	0.2001871828973942	246	3	false	"CpCp13_RS08600"	5	98.0049504950495	0	246	44	0.9973021437782076	false	0	"CpCp13_RS04975"	748364	0.07292035007072135
2.320075757575758	6.791967222819876E-5	0.43102040816326526	0.4420289855072464	69	4	false	"CpCp13_RS04140"	5	239.63768115942028	0	69	0	0.9971913281753707	false	0	"CpCp13_RS03505"	51064	0.17428194993412385
2.087594696969697	0.008257759177999263	0.47902018598321616	0.1383113571792817	413	4	false	"CpCp13_RS04560"	5	99.11051212938006	0	413	42	0.9976859687298517	false	0	"CpCp13_RS07465"	1526412	0.06361393589819002
2.347537878787879	1.1226689355618755E-4	0.4259782170229931	0.4341618191433104	62	4	false	"CpCp13_RS06600"	5	193.9516129032258	0	62	0	0.9971328981302385	false	0	"CpCp13_RS02145"	52412	0.14682181143317624
2.628314393939394	1.8897617392913597E-4	0.3804719870293641	0.32	25	4	false	"CpCp13_RS09780"	5	68.84	0	25	0	0.9965355012894906	false	0	"CpCp13_RS00900"	25796	0.0897522816166884
2.605587121212121	8.312395710178141E-4	0.38379065964019626	0.18699186991869918	51	4	false	"CpCp13_RS00020"	5	49.42857142857143	0	51	9	0.9965838571889104	false	0	"CpCp13_RS00080"	98118	0.06222262204629963
2.284090909090909	5.994435426930538E-4	0.43781094527363185	0.33695788026496687	145	4	false	"CpCp13_RS04265"	5	126.8740157480315	0	145	18	0.9972678916827853	false	0	"CpCp13_RS01190"	237106	0.09153969390189863
2.4327651515151514	2.1901569067130325E-4	0.4110548851693266	0.3805668016194332	39	4	false	"CpCp13_RS03955"	5	185.28205128205127	0	39	0	0.9969515635074147	false	0	"CpCp13_RS00185"	56798	0.15755276469562185
2.3304924242424243	1.4494531643940303E-4	0.4290938642828119	0.46924128503075874	77	4	false	"CpCp13_RS02470"	5	181.24675324675326	0	77	0	0.9971691650548034	false	0	"CpCp13_RS05705"	93368	0.1351579069699875
2.444602272727273	7.000266423077344E-5	0.4090644973852411	0.5007112375533428	38	4	false	"CpCp13_RS08710"	5	208.05263157894737	0	38	0	0.9969263781431335	false	0	"CpCp13_RS08670"	26642	0.18044460674670196
2.7234848484848486	1.0121437937784866E-4	0.36717663421418634	0.5052910052910053	32	4	false	"CpCp13_RS00930"	5	69.28571428571429	0	32	4	0.9963330109606705	false	0	"CpCp13_RS06160"	18392	0.11803358481382331
2.3020833333333335	0.002461515656270494	0.43438914027149317	0.2010981468771448	119	4	false	"CpCp13_RS03185"	5	80.64893617021276	0	119	25	0.997229609929078	false	0	"CpCp13_RS04630"	416278	0.05831448746942355
2.4195075757575757	0.0021423597775770465	0.413307240704501	0.18656215005599106	120	4	false	"CpCp13_RS04605"	5	64.98947368421052	0	120	25	0.9969797711154095	false	0	"CpCp13_RS09960"	394094	0.057259448179921166
2.5288825757575757	1.5396327521180697E-4	0.39543156712226174	0.41442307692307695	65	4	false	"CpCp13_RS01530"	5	138.3230769230769	0	65	0	0.996747058349452	false	0	"CpCp13_RS05810"	54204	0.14699583094907218
2.413352272727273	5.808683999889671E-5	0.41436138905238373	0.4415322580645161	32	4	false	"CpCp13_RS03275"	5	208.65625	0	32	0	0.9969928675048356	false	0	"CpCp13_RS05070"	22416	0.1713105500821018
2.6074810606060606	9.37299458539801E-5	0.38351189395315055	0.5158371040723982	59	4	false	"CpCp13_RS03745"	5	136.55769230769232	0	59	7	0.9965798275306254	false	0	"CpCp13_RS08585"	26012	0.16815081470253884
2.2793560606060606	3.7251019363479206E-4	0.4387203988367262	0.48008171603677224	94	4	false	"CpCp13_RS04240"	5	162.3370786516854	0	94	5	0.9972779658284977	false	0	"CpCp13_RS09900"	180620	0.11296943538739415
2.547348484848485	4.3559406403735535E-5	0.3925650557620818	0.629951690821256	46	4	false	"CpCp13_RS01540"	5	151.2608695652174	0	46	0	0.9967077691811734	false	0	"CpCp13_RS07065"	18674	0.16495187520743446
2.300662878787879	0.0013238499496790214	0.4346573369005968	0.272964824120603	251	4	false	"CpCp13_RS04965"	5	109.96	0	251	51	0.9972326321727918	false	0	"CpCp13_RS08380"	426118	0.08604068857589985
2.3726325757575757	3.3834881143405204E-4	0.4214727599281581	0.39855072463768115	89	4	false	"CpCp13_RS03530"	5	111.34782608695652	0	89	20	0.9970795051579626	false	0	"CpCp13_RS03650"	103420	0.08844148219774148
2.565340909090909	3.1886275654121144E-5	0.3898117386489479	0.42424242424242425	22	4	false	"CpCp13_RS02930"	5	144.86363636363637	0	22	0	0.9966694874274661	false	0	"CpCp13_RS05605"	11300	0.15849413168888005
2.398200757575758	1.2365961534954362E-4	0.4169792694965449	0.42358540454785826	62	4	false	"CpCp13_RS02400"	5	184.8709677419355	0	62	0	0.9970251047711154	false	0	"CpCp13_RS00655"	57134	0.1525338017672735
2.2320075757575757	0.0019359585939475372	0.44802715316079766	0.2032166249442749	275	4	false	"CpCp13_RS05910"	5	113.12809917355372	0	275	33	0.9973787072856222	false	0	"CpCp13_RS04830"	467582	0.08191752293523079
2.4086174242424243	1.1278428382709882E-4	0.4151759386671909	0.4474025974025974	56	4	false	"CpCp13_RS04230"	5	190.82142857142858	0	56	0	0.997002941650548	false	0	"CpCp13_RS04575"	54670	0.15862130388314927
2.193655303030303	0.003936998310727028	0.4558601338225771	0.18678910281307218	309	3	false	"CpCp13_RS03250"	5	108.88475836431226	0	309	40	0.9974603078658929	false	0	"CpCp13_RS03415"	893386	0.07593079383843254
2.1818181818181817	0.0018145490064979202	0.45833333333333337	0.23214380121596617	226	4	false	"CpCp13_RS04640"	5	118.22051282051282	0	226	31	0.9974854932301741	false	0	"CpCp13_RS09675"	573730	0.07706682713201618
2.1586174242424243	0.0037849883968591068	0.4632594867295459	0.15708639186900056	260	4	false	"CpCp13_RS01200"	5	102.44155844155844	0	260	29	0.9975348565441651	false	0	"CpCp13_RS08285"	928460	0.06617671733950804
2.1988636363636362	4.664279790665944E-4	0.45478036175710596	0.41405433646812956	90	3	false	"CpCp13_RS10590"	5	178.3068181818182	0	90	2	0.9974492263056093	false	0	"CpCp13_RS10635"	241882	0.11116385173430061
2.2793560606060606	0.0013811365021368619	0.4387203988367262	0.3	102	4	false	"CpCp13_RS07375"	5	123.05	0	102	22	0.9972779658284977	false	0	"CpCp13_RS09135"	300580	0.08515570934256056
2.3290719696969697	0.0012129169013152126	0.4293555600731856	0.19898411674594857	191	4	false	"CpCp13_RS08235"	5	97.9113924050633	0	191	33	0.997172187298517	false	0	"CpCp13_RS06175"	227854	0.07752287601351013
2.258049242424242	1.7005283312989408E-4	0.4428601383937933	0.3878610840636157	79	4	false	"CpCp13_RS07510"	5	215.53164556962025	0	79	0	0.9973232994842037	false	0	"CpCp13_RS06740"	96002	0.14455509427875268
2.3390151515151514	0.0025412235722605367	0.42753036437246966	0.31952662721893493	220	3	false	"CpCp13_RS06335"	5	102.55882352941177	0	220	50	0.997151031592521	false	0	"CpCp13_RS02260"	515108	0.08365320026868822
2.3925189393939394	4.220520773816871E-4	0.4179695230556105	0.3801537386443047	54	3	false	"CpCp13_RS05240"	5	131.85185185185185	0	54	0	0.9970371937459703	false	0	"CpCp13_RS05305"	102438	0.10728385016424073
2.3167613636363638	0.0018580535914506163	0.4316370324954016	0.21364221364221364	146	3	false	"CpCp13_RS05480"	5	95.83928571428571	0	146	34	0.9971983800773694	false	0	"CpCp13_RS02620"	344408	0.07200547386497799
2.226799242424242	7.892743401443582E-4	0.44907505847331497	0.2850889192886457	100	3	false	"CpCp13_RS03790"	5	135.80232558139534	0	100	14	0.9973897888459059	false	0	"CpCp13_RS03215"	228802	0.08778430871454128
2.226325757575758	3.5864128532033657E-4	0.44917056571671626	0.37218045112781956	77	4	false	"CpCp13_RS10785"	5	198.6883116883117	0	77	0	0.9973907962604771	false	0	"CpCp13_RS05185"	205570	0.1275277995432039
2.065340909090909	0.007577029569097956	0.484181568088033	0.12335062335062336	341	3	false	"CpCp13_RS09240"	5	97.5925925925926	0	341	44	0.9977333172147002	false	0	"CpCp13_RS01205"	1758838	0.05819474811722874
2.3428030303030303	7.119777123462405E-5	0.42683912691996767	0.44060283687943264	48	4	false	"CpCp13_RS00680"	5	211.54166666666666	0	48	0	0.9971429722759511	false	0	"CpCp13_RS01415"	35690	0.15728004956629493
2.018939393939394	0.011582077851999965	0.49530956848030017	0.11682237193086935	445	3	false	"CpCp13_RS08880"	5	97.01741293532338	0	445	43	0.9978320438426822	false	0	"CpCp13_RS07645"	2329044	0.05809425924270861
2.3958333333333335	2.081883541674763E-4	0.41739130434782606	0.3613053613053613	93	4	false	"CpCp13_RS03285"	5	114.6025641025641	0	93	15	0.9970301418439717	false	0	"CpCp13_RS05410"	64026	0.09494827183311028
2.2945075757575757	1.7249185939297723E-4	0.4358233594717293	0.40538847117794485	57	4	false	"CpCp13_RS02660"	5	177.26315789473685	0	57	0	0.9972457285622179	false	0	"CpCp13_RS00495"	88726	0.12352833302769117
2.437026515151515	5.6305131698087776E-5	0.41033611812706433	0.40923076923076923	26	4	false	"CpCp13_RS00080"	5	151.30769230769232	0	26	0	0.9969424967762734	false	0	"CpCp13_RS01565"	20776	0.1292123760099849
2.325284090909091	3.0150959651333725E-4	0.4300549786194258	0.49660397074190177	88	3	false	"CpCp13_RS07065"	5	165.29545454545453	0	88	0	0.9971802466150871	false	0	"CpCp13_RS02285"	142574	0.12363160399809614
2.272253787878788	1.5891266900190524E-4	0.4400916857678683	0.4415653093601269	62	4	false	"CpCp13_RS01415"	5	206.82258064516128	0	62	0	0.9972930770470664	false	0	"CpCp13_RS00150"	108012	0.14012369962409302
2.160037878787879	0.0030035852948019186	0.4629548443665059	0.16356107660455488	264	4	false	"CpCp13_RS07000"	5	106.23809523809524	0	264	33	0.9975318343004513	false	0	"CpCp13_RS09355"	773438	0.06880705650135702
2.268465909090909	3.954811350112167E-4	0.44082654978083907	0.5286669851887243	92	4	false	"CpCp13_RS06420"	5	176.81521739130434	0	92	0	0.9973011363636363	false	0	"CpCp13_RS03785"	202914	0.12160606423060821
2.1553030303030303	0.001974840899919407	0.46397188049209137	0.2047984267453294	269	4	false	"CpCp13_RS01450"	5	122.9424778761062	0	269	43	0.9975419084461639	false	0	"CpCp13_RS04735"	550708	0.07885983186408352
2.165719696969697	0.0021554267686622218	0.4617402710975077	0.2124413992066354	265	3	false	"CpCp13_RS07950"	5	125.47457627118644	0	265	29	0.9975197453255964	false	0	"CpCp13_RS00130"	577228	0.0822244929693227
2.412405303030303	1.1883606066746407E-4	0.4145240431795878	0.5141242937853108	69	4	false	"CpCp13_RS06095"	5	150.33333333333334	0	69	9	0.996994882333978	false	0	"CpCp13_RS05690"	56818	0.12654320987654322
2.550189393939394	1.4897373447080283E-4	0.3921277385815076	0.35978835978835977	28	4	false	"CpCp13_RS02555"	5	96.64285714285714	0	28	0	0.996701724693746	false	0	"CpCp13_RS05475"	29226	0.10172932330827068
2.250473484848485	0.006296604684330317	0.444350936250789	0.15419936065097356	222	3	false	"CpCp13_RS00045"	5	77.97311827956989	0	222	36	0.9973394181173436	false	0	"CpCp13_RS06435"	1072816	0.05581468738695053
2.531723484848485	2.2086359171914763E-4	0.3949878436506452	0.4618055555555556	74	4	false	"CpCp13_RS08040"	5	124.4375	0	74	10	0.9967410138620245	false	0	"CpCp13_RS10860"	61824	0.13323072805139186
2.4398674242424243	0.001159298439296074	0.40985833495051427	0.2891296869625043	193	4	false	"CpCp13_RS07080"	5	93.94771241830065	0	193	40	0.9969364522888459	false	0	"CpCp13_RS02965"	242278	0.09112290244258066
2.4427083333333335	4.32012396738335E-4	0.4093816631130064	0.4064646464646465	135	4	false	"CpCp13_RS00455"	5	110.11	0	135	35	0.9969304078014185	false	0	"CpCp13_RS03040"	120374	0.10204819277108433
2.3882575757575757	0.002694572286346481	0.41871530531324347	0.28528656971770744	224	3	false	"CpCp13_RS09185"	5	100.16666666666667	0	224	56	0.9970462604771115	false	0	"CpCp13_RS03020"	499864	0.08911625148279953
2.490530303030303	5.2767586846481544E-5	0.4015209125475285	0.4962121212121212	36	4	false	"CpCp13_RS01085"	5	146.0909090909091	0	36	3	0.9968286589297227	false	0	"CpCp13_RS02315"	20658	0.1380821446984018
2.359848484848485	6.375397999716514E-4	0.42375601926163725	0.3114898618865707	107	4	false	"CpCp13_RS06080"	6	112.71084337349397	0	107	24	0.9971067053513861	false	0	"CpCp13_RS08045"	147196	0.08853954703338097
2.414772727272727	1.0401213420575997E-4	0.4141176470588236	0.38693270735524254	76	4	false	"CpCp13_RS08610"	6	168.20833333333334	0	76	4	0.9969898452611218	false	0	"CpCp13_RS03200"	35212	0.14218794026486334
2.3768939393939394	5.833276085440695E-5	0.42071713147410356	0.42819148936170215	48	4	false	"CpCp13_RS09740"	6	224.66666666666666	0	48	0	0.9970704384268214	false	0	"CpCp13_RS07000"	34268	0.1748378728923476
2.472064393939394	1.2940309221003648E-4	0.40452020685692397	0.5048518896833504	112	4	false	"CpCp13_RS09895"	6	143.47191011235955	0	112	23	0.9968679480980013	false	0	"CpCp13_RS06045"	55642	0.13862020300711067
2.355587121212121	6.039033377920444E-4	0.4245226130653266	0.3368421052631579	89	3	false	"CpCp13_RS02010"	6	133.8421052631579	0	89	13	0.9971157720825274	false	0	"CpCp13_RS07380"	131682	0.10415728036043416
2.3394886363636362	2.0910473572799935E-4	0.42744383727990287	0.4394977168949772	75	4	false	"CpCp13_RS06195"	6	189.84931506849315	0	75	2	0.9971500241779497	false	0	"CpCp13_RS03885"	98926	0.14317444575301141
2.172348484848485	0.005895148428607372	0.46033129904097647	0.1523002720751917	353	3	false	"CpCp13_RS09735"	6	95.0801282051282	0	353	41	0.9975056415215989	false	0	"CpCp13_RS00915"	1091112	0.0662117884436826
2.6268939393939394	1.9051147185636532E-4	0.38067772170151404	0.39191919191919194	68	4	false	"CpCp13_RS05345"	6	92.74545454545455	0	68	13	0.9965385235332044	false	0	"CpCp13_RS01110"	37134	0.12316793432331281
2.569128787878788	0.0010572799643116765	0.3892370070033173	0.27856025039123633	95	4	false	"CpCp13_RS02610"	6	73.56944444444444	0	95	23	0.9966614281108962	false	0	"CpCp13_RS06230"	129830	0.08746201611837759
2.3896780303030303	5.635346660258644E-5	0.4184664156924906	0.38902439024390245	41	4	false	"CpCp13_RS04090"	6	205.4878048780488	0	41	0	0.9970432382333979	false	0	"CpCp13_RS06005"	25368	0.16192892425378155
2.390151515151515	0.0010992762568411102	0.4183835182250396	0.42337164750957856	155	3	false	"CpCp13_RS00260"	6	116.47863247863248	0	155	38	0.9970422308188266	false	0	"CpCp13_RS00295"	247414	0.09946937017816608
2.2334280303030303	0.0021184321967744734	0.4477422090311639	0.29626102964514694	229	3	false	"CpCp13_RS02545"	6	117.97752808988764	0	229	51	0.9973756850419085	false	0	"CpCp13_RS04010"	613516	0.08187198340727803
2.305397727272727	2.4992363265034675E-4	0.43376463339494764	0.3835546475995914	100	4	false	"CpCp13_RS05570"	6	177.08988764044943	0	100	11	0.9972225580270793	false	0	"CpCp13_RS07555"	103860	0.12795512112749236
2.653409090909091	5.038058221753264E-4	0.37687366167023556	0.3205387205387205	74	4	false	"CpCp13_RS01335"	6	73.49090909090908	0	74	19	0.9964821083172147	false	0	"CpCp13_RS02795"	64130	0.10760015972314654
2.4081439393939394	0.0022482556406388334	0.41525756979944944	0.19808481532147743	110	4	false	"CpCp13_RS09255"	6	77.62790697674419	0	110	24	0.9970039490651192	false	0	"CpCp13_RS03665"	309382	0.06657624955123859
2.6463068181818183	1.903361178879889E-4	0.37788513150831987	0.4034090909090909	33	4	false	"CpCp13_RS08885"	6	89.66666666666667	0	33	0	0.9964972195357834	false	0	"CpCp13_RS06835"	27654	0.12333791838606144
2.4796401515151514	3.9123809820855785E-4	0.40328432308573614	0.27926829268292686	48	4	false	"CpCp13_RS00830"	6	85.26829268292683	0	48	7	0.9968518294648614	false	0	"CpCp13_RS06420"	56178	0.07991405124922851
2.2769886363636362	0.0023333861766304505	0.43917654398003747	0.22083766008999653	131	4	false	"CpCp13_RS09150"	6	93.19444444444444	0	131	23	0.997283002901354	false	0	"CpCp13_RS01580"	415692	0.06562989045383412
2.2713068181818183	0.001582992711583592	0.440275171982489	0.2009090909090909	199	4	false	"CpCp13_RS02935"	6	107.93181818181819	0	199	23	0.9972950918762089	false	0	"CpCp13_RS03335"	324058	0.0788975279106858
2.2230113636363638	0.0028732187208943285	0.4498402555910543	0.18440135694500637	301	4	false	"CpCp13_RS00410"	6	105.8267716535433	0	301	47	0.9973978481624758	false	0	"CpCp13_RS05010"	628062	0.07624407179650095
2.334753787878788	0.0021859870887969094	0.42831068748732504	0.3097622027534418	250	4	false	"CpCp13_RS05380"	6	105.45212765957447	0	250	62	0.9971600983236621	false	0	"CpCp13_RS10405"	552458	0.08657810152674422
2.475378787878788	1.6479832120974087E-4	0.4039785768936495	0.4322678843226788	73	4	false	"CpCp13_RS09610"	6	141.0	0	73	0	0.9968608961960025	false	0	"CpCp13_RS03795"	65062	0.13570741097208855
2.2987689393939394	1.2914726928269044E-4	0.43501544799176106	0.3599114064230343	43	4	false	"CpCp13_RS05685"	6	204.27906976744185	0	43	0	0.9972366618310767	false	0	"CpCp13_RS03895"	67284	0.1416637099635519
2.415719696969697	1.918204164194947E-4	0.41395531164249316	0.4521044992743106	67	4	false	"CpCp13_RS09045"	6	139.39622641509433	0	67	14	0.9969878304319794	false	0	"CpCp13_RS07900"	60200	0.11763394634185176
2.356060606060606	2.1919968120891187E-4	0.4244372990353698	0.4535201640464798	77	3	false	"CpCp13_RS03970"	6	165.66233766233765	0	77	0	0.9971147646679561	false	0	"CpCp13_RS08730"	102558	0.12912107378202467
2.481534090909091	2.745513818703941E-4	0.4029765311963366	0.4204081632653061	50	4	false	"CpCp13_RS02070"	6	131.32	0	50	0	0.9968477998065765	false	0	"CpCp13_RS01450"	81446	0.12482889733840304
2.383522727272727	2.9662802702669344E-4	0.41954707985697265	0.4230769230769231	59	4	false	"CpCp13_RS02320"	6	131.60377358490567	0	59	6	0.997056334622824	false	0	"CpCp13_RS06565"	85224	0.10528301886792453
2.203125	0.00345722578364209	0.45390070921985815	0.17210619090860532	225	4	false	"CpCp13_RS00445"	6	98.21649484536083	0	225	31	0.9974401595744681	false	0	"CpCp13_RS08605"	665592	0.06591711063447035
2.3233901515151514	0.0019160129296042878	0.4304055431016915	0.1972432537371384	124	4	false	"CpCp13_RS09590"	6	87.7843137254902	0	124	22	0.997184276273372	false	0	"CpCp13_RS08225"	325220	0.06605290724265628
2.410037878787879	0.0027262774445812156	0.4149312377210216	0.15493827160493828	95	3	false	"CpCp13_RS08865"	6	70.0	0	95	14	0.9969999194068343	false	0	"CpCp13_RS00280"	336742	0.060085836909871244
2.4166666666666665	1.7779308021572107E-4	0.4137931034482759	0.5577324973876698	88	4	false	"CpCp13_RS10005"	6	152.67045454545453	0	88	0	0.9969858156028368	false	0	"CpCp13_RS04425"	86886	0.13333664152441446
2.491003787878788	1.7838640149616593E-4	0.4014445922828359	0.4008859357696567	59	4	false	"CpCp13_RS06150"	6	91.48837209302326	0	59	16	0.9968276515151515	false	0	"CpCp13_RS04450"	42012	0.08839456240871812
2.452651515151515	2.1354725037439246E-4	0.40772200772200773	0.4676923076923077	26	4	false	"CpCp13_RS07870"	6	162.15384615384616	0	26	0	0.9969092520954224	false	0	"CpCp13_RS00510"	47836	0.14174287251210327
2.3134469696969697	7.820345057232643E-4	0.4322554236594351	0.36196280073636766	233	4	false	"CpCp13_RS00620"	6	124.01123595505618	0	233	55	0.9972054319793681	false	0	"CpCp13_RS05095"	273958	0.09741652470939213
2.367424242424242	0.001191054783076332	0.42240000000000005	0.2905592841163311	197	3	false	"CpCp13_RS08570"	6	101.90666666666667	0	197	47	0.9970905867182462	false	0	"CpCp13_RS10020"	293220	0.08592467678471051
2.5823863636363638	1.0026894403301675E-4	0.3872387238723872	0.5	22	4	false	"CpCp13_RS02280"	6	134.71428571428572	0	22	1	0.9966332205029014	false	0	"CpCp13_RS09325"	16000	0.14984903861433338
2.2637310606060606	0.004223005070427331	0.4417485881614725	0.13351327600276192	194	4	false	"CpCp13_RS05485"	6	79.22905027932961	0	194	15	0.9973112105093488	false	0	"CpCp13_RS00605"	692874	0.057453988599948956
2.4640151515151514	3.1013656038174613E-4	0.40584166026133744	0.41120448179271707	93	4	false	"CpCp13_RS10450"	7	135.51764705882354	0	93	8	0.9968850741457125	false	0	"CpCp13_RS05820"	104570	0.12894162422342867
2.6553030303030303	7.243521896701666E-5	0.37660485021398005	0.42391304347826086	30	4	false	"CpCp13_RS00500"	7	72.16666666666667	0	30	6	0.9964780786589298	false	0	"CpCp13_RS00315"	13888	0.10093240093240093
2.3650568181818183	2.1785554682050178E-4	0.4228228228228228	0.34423292273236283	107	4	false	"CpCp13_RS05550"	7	139.33684210526314	0	107	12	0.9970956237911025	false	0	"CpCp13_RS03160"	68560	0.11164811066126856
2.3584280303030303	7.771830449097893E-5	0.4240112427223449	0.48125	70	4	false	"CpCp13_RS05765"	7	202.46153846153845	0	70	5	0.9971097275951	false	0	"CpCp13_RS03875"	37298	0.15538107326288447
2.281723484848485	0.0017562191885678452	0.43826520024901433	0.22599488864549105	198	4	false	"CpCp13_RS07430"	7	121.72289156626506	0	198	32	0.9972729287556414	false	0	"CpCp13_RS10125"	376476	0.08969999378501478
2.4985795454545454	0.0015345271065516802	0.40022740193291645	0.20993788819875778	89	4	false	"CpCp13_RS05515"	7	63.58571428571429	0	89	19	0.9968115328820115	false	0	"CpCp13_RS09285"	196584	0.06416318293210321
2.4242424242424243	0.002033991815701373	0.4125	0.187010078387458	117	4	false	"CpCp13_RS06480"	7	70.53684210526316	0	117	22	0.996969696969697	false	0	"CpCp13_RS00385"	278984	0.06286706069987803
2.5601325757575757	5.5987950107768114E-5	0.3906047715923803	0.44761904761904764	21	4	false	"CpCp13_RS08900"	7	155.1904761904762	0	21	0	0.9966805689877498	false	0	"CpCp13_RS06155"	16562	0.162503116429818
2.2395833333333335	8.818490287165349E-4	0.44651162790697674	0.3246536072623029	114	3	false	"CpCp13_RS01300"	7	136.05434782608697	0	114	22	0.9973625886524823	false	0	"CpCp13_RS08580"	268408	0.08986416633162943
2.116003787878788	0.003786816018728393	0.47258894607294694	0.17616774108380454	345	4	false	"CpCp13_RS09730"	7	112.35099337748345	0	345	43	0.997625523855577	false	0	"CpCp13_RS02365"	937876	0.07165241924584403
2.3882575757575757	6.443976844914775E-5	0.41871530531324347	0.4771729587357331	72	4	false	"CpCp13_RS00285"	7	201.38235294117646	0	72	4	0.9970462604771115	false	0	"CpCp13_RS05830"	33840	0.16399214408890592
2.211647727272727	3.61158568705327E-4	0.4521515735388568	0.36396936396936397	78	3	false	"CpCp13_RS09050"	7	184.42307692307693	0	78	0	0.9974220261121857	false	0	"CpCp13_RS00190"	195294	0.11620861809897727
2.456439393939394	3.5996879367259293E-4	0.4070932922127988	0.3840682788051209	41	4	false	"CpCp13_RS02720"	7	118.97368421052632	0	41	3	0.9969011927788524	false	0	"CpCp13_RS00440"	87324	0.1067986393272229
2.265151515151515	0.004774360847775062	0.4414715719063545	0.16908581614463966	181	3	false	"CpCp13_RS03840"	7	79.12987012987013	0	181	27	0.997308188265635	false	0	"CpCp13_RS01895"	743268	0.05660219608717463
2.477272727272727	4.7009142134168133E-4	0.4036697247706422	0.3366120218579235	87	4	false	"CpCp13_RS09715"	7	81.45901639344262	0	87	26	0.9968568665377175	false	0	"CpCp13_RS10755"	100454	0.07802587777149676
2.5321969696969697	7.308941739449161E-4	0.3949139865370232	0.292896174863388	81	4	false	"CpCp13_RS03375"	7	64.72131147540983	0	81	20	0.9967400064474532	false	0	"CpCp13_RS08795"	123750	0.06974279253815716
2.268465909090909	1.732307667510141E-4	0.44082654978083907	0.41993281075027994	105	4	false	"CpCp13_RS03600"	7	180.85263157894738	0	105	10	0.9973011363636363	false	0	"CpCp13_RS02110"	96896	0.12429734129137276
2.3536931818181817	7.636108287839677E-4	0.42486421243210626	0.1907070707070707	109	4	false	"CpCp13_RS10485"	7	103.71	0	109	9	0.9971198017408124	false	0	"CpCp13_RS04935"	161434	0.08153301886792452
2.648674242424242	1.8866206470451904E-4	0.3775473721844834	0.4654255319148936	68	4	false	"CpCp13_RS10335"	7	81.95833333333333	0	68	20	0.9964921824629271	false	0	"CpCp13_RS02295"	44790	0.11592409240924093
2.344223484848485	1.0397099603394363E-4	0.42658048879014343	0.455011655011655	66	4	false	"CpCp13_RS08025"	7	197.12121212121212	0	66	0	0.9971399500322372	false	0	"CpCp13_RS03985"	51124	0.14899562518610138
2.4318181818181817	1.3006728300042766E-4	0.4112149532710281	0.4897435897435897	40	4	false	"CpCp13_RS05250"	7	180.575	0	40	0	0.9969535783365571	false	0	"CpCp13_RS10850"	36826	0.15407423208191126
2.5625	3.932500998076063E-5	0.3902439024390244	0.4074074074074074	28	4	false	"CpCp13_RS01355"	7	122.39285714285714	0	28	0	0.9966755319148937	false	0	"CpCp13_RS03400"	11926	0.1311437758383096
2.4786931818181817	0.001479030706911953	0.40343839541547283	0.2074074074074074	70	4	false	"CpCp13_RS05750"	7	69.03636363636363	0	70	15	0.9968538442940038	false	0	"CpCp13_RS01480"	162498	0.06593731006338456
2.269412878787879	4.627177621204729E-4	0.4406426037972042	0.4211612142646625	125	4	false	"CpCp13_RS05975"	7	154.8803418803419	0	125	8	0.9972991215344938	false	0	"CpCp13_RS05030"	209412	0.10853562850759767
2.428977272727273	0.0013540181020381314	0.4116959064327485	0.25622869131917125	157	4	false	"CpCp13_RS03580"	7	95.62096774193549	0	157	33	0.9969596228239845	false	0	"CpCp13_RS06060"	258332	0.08821122485418402
2.5771780303030303	1.9756705802771894E-4	0.38802131177659377	0.3047619047619048	28	4	false	"CpCp13_RS05780"	7	78.52380952380952	0	28	7	0.9966443020631851	false	0	"CpCp13_RS09535"	27018	0.08907626614777579
2.4635416666666665	7.823650498894857E-4	0.40591966173361527	0.23214285714285715	70	4	false	"CpCp13_RS06400"	7	82.48979591836735	0	70	21	0.9968860815602837	false	0	"CpCp13_RS03635"	100408	0.07581782713085235
2.1856060606060606	0.002259164321715676	0.45753899480069327	0.196084287373486	291	3	false	"CpCp13_RS05210"	7	111.73577235772358	0	291	45	0.9974774339136041	false	0	"CpCp13_RS07830"	552706	0.07580445885869985
2.296875	0.0020851529026860703	0.43537414965986393	0.22263450834879406	144	3	false	"CpCp13_RS05460"	7	74.95959595959596	0	144	45	0.9972406914893617	false	0	"CpCp13_RS00670"	336726	0.05408340256825105
2.406723484848485	9.225860338319562E-5	0.4155026559118631	0.30295566502463056	29	4	false	"CpCp13_RS04105"	7	145.82758620689654	0	29	0	0.997006971308833	false	0	"CpCp13_RS02090"	30084	0.11798348398616226
2.203125	8.816589742721767E-4	0.45390070921985815	0.2875022673680392	178	4	false	"CpCp13_RS04940"	7	144.48322147651007	0	178	29	0.9974401595744681	false	0	"CpCp13_RS07215"	278632	0.09400339718705925
2.0520833333333335	0.007748410369759864	0.4873096446700507	0.1352487051695495	442	3	false	"CpCp13_RS04290"	7	102.54089709762533	0	442	63	0.9977615248226951	false	0	"CpCp13_RS00310"	1607576	0.06317985033741548
2.336647727272727	0.002609223154347814	0.4279635258358663	0.3089062216578995	209	3	false	"CpCp13_RS01115"	7	97.83221476510067	0	209	60	0.9971560686653771	false	0	"CpCp13_RS08860"	521340	0.07814074661749255
2.4431818181818183	1.8244474400550762E-4	0.40930232558139534	0.5582417582417583	98	4	false	"CpCp13_RS09635"	7	150.3846153846154	0	98	7	0.9969294003868472	false	0	"CpCp13_RS09270"	92232	0.1383483122213573
2.453598484848485	0.0016272918487700678	0.40756464685449634	0.19361638060825054	110	3	false	"CpCp13_RS10380"	7	62.170731707317074	0	110	28	0.9969072372662798	false	0	"CpCp13_RS03900"	240704	0.057995085547870404
2.2869318181818183	4.4449086699626126E-4	0.4372670807453416	0.4270861833105335	88	4	false	"CpCp13_RS02565"	7	172.0	0	88	2	0.9972618471953578	false	0	"CpCp13_RS03560"	218382	0.12087139845397049
2.5828598484848486	0.0011313459829425357	0.38716773602199817	0.2804828973843058	94	4	false	"CpCp13_RS05930"	7	68.63380281690141	0	94	23	0.99663221308833	false	0	"CpCp13_RS01610"	170390	0.0845243877055436
[truncated: 164 more rows]

## Sheet: Network_analysis_Clusters_CP-258
AverageShortestPathLength	BetweennessCentrality	ClosenessCentrality	ClusteringCoefficient	Degree	Eccentricity	IsSingleNode	kmeans Cluster	name	NeighborhoodConnectivity	NumberOfDirectedEdges	NumberOfUndirectedEdges	PartnerOfMultiEdgedNodePairs	Radiality	selected	SelfLoops	shared name	Stress	TopologicalCoefficient
[truncated: 1,936 more rows]

[truncated: 2 more sheets: Network_analysis_Clusters_CP-1002, Network_analysis_Clusters_CP-T1]
