# Supplementary material for: Co-Expression Networks for Causal Gene Identification Based on RNA-seq Data of C<em>orynebacterium Pseudotuberculosis</em>
Source: Preprints.org preprint supplement (doi:10.20944/preprints202006.0144.v1), 2020-06-12
Supplement: Supplementary file 4 [file Datasheet 2-Differentially expressed genes network analysis clusters.xlsx]

## Sheet: Network_analysis_Clusters_CP-13
AverageShortestPathLength	BetweennessCentrality	ClosenessCentrality	ClusteringCoefficient	Degree	Eccentricity	IsSingleNode	kmeans Cluster	name	NeighborhoodConnectivity	NumberOfDirectedEdges	NumberOfUndirectedEdges	PartnerOfMultiEdgedNodePairs	Radiality	selected	SelfLoops	shared name	Stress	TopologicalCoefficient
3.29032	0.335305	0.303922	0	5	7	0	0	CpCp13_RS02260	3	0	5	1	0.672811	0	0	CpCp13_RS02260	676	0.333333
2.90323	0.217061	0.344444	0	6	6	0	0	CpCp13_RS04105	5.33333	0	6	3	0.728111	0	0	CpCp13_RS04105	466	0.393939
2.80645	0.535305	0.356322	0	6	6	0	0	CpCp13_RS02285	2.8	0	6	1	0.741935	0	0	CpCp13_RS02285	848	0.257143
2.77419	0.339749	0.360465	0	5	6	0	0	CpCp13_RS04110	3.8	0	5	0	0.746544	0	0	CpCp13_RS04110	640	0.254545
3.51613	0.0160573	0.284404	0	2	7	0	2	CpCp13_RS02275	5	0	2	0	0.640553	0	0	CpCp13_RS02275	54	0.571429
3.19355	0.284659	0.313131	0	8	7	0	0	CpCp13_RS02265	2.71429	0	8	1	0.686636	0	0	CpCp13_RS02265	590	0.244898
4.41935	0.00358423	0.226277	0	2	8	0	2	CpCp13_RS02255	3.5	0	2	0	0.511521	0	0	CpCp13_RS02255	8	0.625
3.51613	0.117168	0.284404	0	5	7	0	0	CpCp13_RS00295	3	0	5	0	0.640553	0	0	CpCp13_RS00295	218	0.285714
4.96774	0	0.201299	0	1	9	0	3	CpCp13_RS01180	3	0	1	0	0.43318	0	0	CpCp13_RS01180	0	0
4	0.23871	0.25	0	3	8	0	1	CpCp13_RS08860	2.33333	0	3	0	0.571429	0	0	CpCp13_RS08860	462	0.333333
4.41935	0.00358423	0.226277	0	2	8	0	2	CpCp13_RS02270	3.5	0	2	0	0.511521	0	0	CpCp13_RS02270	8	0.625
4.54839	0.00609319	0.219858	0.5	5	9	0	0	CpCp13_RS02615	3.5	0	5	1	0.493088	0	0	CpCp13_RS02615	14	0.5
4.70968	0	0.212329	1	2	9	0	2	CpCp13_RS07315	4.5	0	2	0	0.470046	0	0	CpCp13_RS07315	0	0.9
4.67742	0	0.213793	0	1	8	0	3	CpCp13_RS03080	2	0	1	0	0.474654	0	0	CpCp13_RS03080	0	0
3.70968	0.0645161	0.269565	0	2	7	0	2	CpCp13_RS00450	3	0	2	0	0.612903	0	0	CpCp13_RS00450	86	0.5
3.77419	0.367384	0.264957	0.3	6	8	0	0	CpCp13_RS02610	3	0	6	1	0.603687	0	0	CpCp13_RS02610	590	0.4
4.09677	0.0124731	0.244094	0	2	8	0	2	CpCp13_RS04115	4.5	0	2	0	0.557604	0	0	CpCp13_RS04115	42	0.583333
4.09677	0.0124731	0.244094	0	2	8	0	2	CpCp13_RS01235	4.5	0	2	0	0.557604	0	0	CpCp13_RS01235	42	0.583333
3.25806	0.395699	0.306931	0	2	7	0	2	CpCp13_RS10635	5	0	2	0	0.677419	0	0	CpCp13_RS10635	630	0.5
3.74194	0	0.267241	0	1	7	0	3	CpCp13_RS03720	5	0	1	0	0.608295	0	0	CpCp13_RS03720	0	0
4.25806	0	0.234848	0	1	8	0	3	CpCp13_RS07090	4	0	1	0	0.534562	0	0	CpCp13_RS07090	0	0
5.74194	0.0645161	0.174157	0	2	10	0	2	CpCp13_RS03775	1.5	0	2	0	0.322581	0	0	CpCp13_RS03775	120	0.5
6.70968	0	0.149038	0	1	11	0	3	CpCp13_RS03995	2	0	1	0	0.184332	0	0	CpCp13_RS03995	0	0
4.51613	0.145161	0.221429	0.333333	4	9	0	1	CpCp13_RS09955	3.75	0	4	0	0.497696	0	0	CpCp13_RS09955	240	0.46875
4.83871	0.124731	0.206667	0	2	9	0	2	CpCp13_RS08505	2.5	0	2	0	0.451613	0	0	CpCp13_RS08505	236	0.5
4.16129	0	0.24031	0	1	8	0	3	CpCp13_RS01225	7	0	1	0	0.548387	0	0	CpCp13_RS01225	0	0
4.16129	0	0.24031	0	1	8	0	3	CpCp13_RS01230	7	0	1	0	0.548387	0	0	CpCp13_RS01230	0	0
5.35484	0.00501792	0.186747	0.333333	3	10	0	1	CpCp13_RS03560	3.33333	0	3	0	0.37788	0	0	CpCp13_RS03560	6	0.6
4.58065	0.0290323	0.21831	0.333333	3	9	0	1	CpCp13_RS09900	4	0	3	0	0.488479	0	0	CpCp13_RS09900	80	0.611111
3.3871	0.0774194	0.295238	0	2	7	0	2	CpCp13_RS03715	5	0	2	0	0.658986	0	0	CpCp13_RS03715	78	0.5
5.35484	0.0645161	0.186747	0.333333	3	10	0	1	CpCp13_RS02790	2.66667	0	3	0	0.37788	0	0	CpCp13_RS02790	86	0.466667
6.32258	0	0.158163	0	1	11	0	3	CpCp13_RS07080	3	0	1	0	0.239631	0	0	CpCp13_RS07080	0	0

## Sheet: Network_analysis_Clusters_CP-258
AverageShortestPathLength	BetweennessCentrality	ClosenessCentrality	ClusteringCoefficient	Degree	Eccentricity	IsSingleNode	kmeans Cluster	name	NeighborhoodConnectivity	NumberOfDirectedEdges	NumberOfUndirectedEdges	PartnerOfMultiEdgedNodePairs	Radiality	selected	SelfLoops	shared name	Stress	TopologicalCoefficient
3.68132	0.127087	0.271642	0	9	7	0	1	CP258_RS03835	3.875	0	9	1	0.821245	0	0	CP258_RS03835	8284	0.191667
4.2967	0.0153074	0.232737	0	3	8	0	0	CP258_RS08285	8.66667	0	3	0	0.78022	0	0	CP258_RS08285	2172	0.425926
3.16484	0.412506	0.315972	0	17	7	0	1	CP258_RS02710	3.13333	0	17	2	0.855678	0	0	CP258_RS02710	27390	0.106667
3.20879	0.325544	0.311644	0	10	7	0	1	CP258_RS03390	3.5	0	10	0	0.852747	0	0	CP258_RS03390	28298	0.147059
3.62637	0.0334846	0.275758	0	2	7	0	5	CP258_RS09690	10	0	2	0	0.824908	0	0	CP258_RS09690	3104	0.529412
4.91209	0.0434182	0.203579	0	3	8	0	0	CP258_RS03855	4	0	3	1	0.739194	0	0	CP258_RS03855	750	0.5
5.1978	0.0432554	0.192389	0	4	8	0	2	CP258_RS00925	1.66667	0	4	1	0.720147	0	0	CP258_RS00925	840	0.333333
1.28571	0.904762	0.777778	0	5	2	0	2	CP258_RS03755	1.4	0	5	0	0.942857	0	0	CP258_RS03755	38	0.2
1.85714	0.285714	0.538462	0	2	3	0	3	CP258_RS08125	3	0	2	0	0.828571	0	0	CP258_RS08125	12	0.5
4.1978	0	0.23822	0	1	8	0	6	CP258_RS09305	10	0	1	0	0.786813	0	0	CP258_RS09305	0	0
4.30769	0.0826298	0.232143	0	4	6	0	2	CP258_RS03745	2.66667	0	4	1	0.779487	0	0	CP258_RS03745	2400	0.416667
4.1978	0.0978923	0.23822	0	3	7	0	0	CP258_RS00990	4.33333	0	3	0	0.786813	0	0	CP258_RS00990	2674	0.333333
4.20879	0.0336288	0.237598	0	6	8	0	4	CP258_RS04800	6.6	0	6	1	0.786081	0	0	CP258_RS04800	3270	0.311111
1.85714	0.285714	0.538462	0	2	3	0	3	CP258_RS09645	3	0	2	0	0.828571	0	0	CP258_RS09645	12	0.5
3.86813	0.0693297	0.258523	0	7	8	0	4	CP258_RS02745	6.33333	0	7	1	0.808791	0	0	CP258_RS02745	8308	0.253968
4.72527	0.0026914	0.211628	0	4	9	0	2	CP258_RS01575	4	0	4	0	0.751648	0	0	CP258_RS01575	120	0.5
3.93407	0.0457127	0.25419	0	6	8	0	4	CP258_RS03805	6.8	0	6	1	0.804396	0	0	CP258_RS03805	6262	0.305263
3.8022	0.0486767	0.263006	0	4	8	0	2	CP258_RS01900	6	0	4	0	0.813187	0	0	CP258_RS01900	6996	0.357143
3.75824	0.2071	0.266082	0	11	7	0	1	CP258_RS02905	3.72727	0	11	0	0.816117	0	0	CP258_RS02905	11806	0.12987
4.59341	0.00218117	0.217703	0	2	8	0	5	CP258_RS10385	10.5	0	2	0	0.76044	0	0	CP258_RS10385	200	0.678571
4.02198	0.110616	0.248634	0	10	7	0	1	CP258_RS05175	2.9	0	10	0	0.798535	0	0	CP258_RS05175	5274	0.158333
4.59341	0.00218117	0.217703	0	2	8	0	5	CP258_RS06185	10.5	0	2	0	0.76044	0	0	CP258_RS06185	200	0.678571
4.59341	0.00218117	0.217703	0	2	8	0	5	CP258_RS08335	10.5	0	2	0	0.76044	0	0	CP258_RS08335	200	0.678571
3.45055	0.228149	0.289809	0	9	7	0	1	CP258_RS05395	6	0	9	0	0.83663	0	0	CP258_RS05395	13342	0.185185
4.1978	0.0878667	0.23822	0	11	8	0	1	CP258_RS01735	3.88889	0	11	2	0.786813	0	0	CP258_RS01735	8104	0.262626
4.53846	0.0180772	0.220339	0	7	8	0	4	CP258_RS03930	5.66667	0	7	1	0.764103	0	0	CP258_RS03930	884	0.333333
3.52747	0.239946	0.283489	0	16	7	0	1	CP258_RS02810	3	0	16	2	0.831502	0	0	CP258_RS02810	21428	0.133333
3.31868	0.0908416	0.301325	0	4	6	0	2	CP258_RS03905	8.75	0	4	0	0.845421	0	0	CP258_RS03905	8276	0.336957
3.53846	0.0293635	0.282609	0	2	6	0	5	CP258_RS09815	12	0	2	0	0.830769	0	0	CP258_RS09815	3902	0.611111
4.10989	0.00507562	0.243316	0	3	8	0	0	CP258_RS06280	7.66667	0	3	0	0.792674	0	0	CP258_RS06280	950	0.47619
3.79121	0.0555382	0.263768	0	6	7	0	4	CP258_RS00985	5.4	0	6	1	0.813919	0	0	CP258_RS00985	4172	0.275
4.24176	0.0558847	0.235751	0	7	8	0	4	CP258_RS03205	4.42857	0	7	0	0.783883	0	0	CP258_RS03205	5830	0.311688
4.69231	0.00322693	0.213115	0	2	8	0	5	CP258_RS02235	8	0	2	0	0.753846	0	0	CP258_RS02235	190	0.636364
3.36264	0.0773967	0.297386	0	3	6	0	0	CP258_RS10245	10.6667	0	3	0	0.842491	0	0	CP258_RS10245	7528	0.439394
4.67033	0	0.214118	0	1	8	0	6	CP258_RS07705	8	0	1	0	0.755311	0	0	CP258_RS07705	0	0
4.59341	0.00218117	0.217703	0	2	8	0	5	CP258_RS06325	10.5	0	2	0	0.76044	0	0	CP258_RS06325	200	0.678571
4.15385	0	0.240741	0	1	8	0	6	CP258_RS06835	15	0	1	0	0.789744	0	0	CP258_RS06835	0	0
5.25275	0.0292546	0.190377	0	2	7	0	5	CP258_RS02465	2.5	0	2	0	0.716484	0	0	CP258_RS02465	660	0.5
4.98901	0.00275475	0.200441	0	2	8	0	5	CP258_RS09640	6	0	2	0	0.734066	0	0	CP258_RS09640	110	0.555556
4.13187	0.021978	0.242021	0	2	8	0	5	CP258_RS09620	8	0	2	0	0.791209	0	0	CP258_RS09620	648	0.5
4.03297	0.122265	0.247956	0	5	7	0	2	CP258_RS00255	5.6	0	5	0	0.797802	0	0	CP258_RS00255	3516	0.2875
5.23077	0	0.191176	0	1	9	0	6	CP258_RS01640	7	0	1	0	0.717949	0	0	CP258_RS01640	0	0
4.51648	0	0.221411	0	1	8	0	6	CP258_RS08025	14	0	1	0	0.765568	0	0	CP258_RS08025	0	0
4.74725	0	0.210648	0	1	8	0	6	CP258_RS00440	11	0	1	0	0.750183	0	0	CP258_RS00440	0	0
4.54945	0.0281039	0.219807	0	4	8	0	2	CP258_RS04575	6.25	0	4	0	0.76337	0	0	CP258_RS04575	2658	0.375
4.40659	0.00489228	0.226933	0	5	8	0	2	CP258_RS00830	6	0	5	2	0.772894	0	0	CP258_RS00830	356	0.454545
4.51648	0	0.221411	0	1	8	0	6	CP258_RS10160	14	0	1	0	0.765568	0	0	CP258_RS10160	0	0
4.51648	0.0385069	0.221411	0	7	8	0	4	CP258_RS05445	5.33333	0	7	1	0.765568	0	0	CP258_RS05445	2886	0.288889
3.62637	0.0334846	0.275758	0	2	7	0	5	CP258_RS00865	10	0	2	0	0.824908	0	0	CP258_RS00865	3104	0.529412
3.71429	0.0763099	0.269231	0	5	6	0	2	CP258_RS02685	3.4	0	5	0	0.819048	0	0	CP258_RS02685	6580	0.342857
4.17582	0.00618419	0.239474	0	3	7	0	0	CP258_RS09920	4	0	3	0	0.788278	0	0	CP258_RS09920	756	0.428571
4.37363	0.0011084	0.228643	0	2	8	0	5	CP258_RS01890	7.5	0	2	0	0.775092	0	0	CP258_RS01890	102	0.65
4.37363	0.0246733	0.228643	0	3	8	0	0	CP258_RS10230	5.33333	0	3	0	0.775092	0	0	CP258_RS10230	1136	0.481481
5.0989	0.000715863	0.196121	0	3	9	0	0	CP258_RS05505	8	0	3	1	0.72674	0	0	CP258_RS05505	42	0.636364
3.53846	0.0293635	0.282609	0	2	6	0	5	CP258_RS10685	12	0	2	0	0.830769	0	0	CP258_RS10685	3902	0.611111
4.32967	0.00838533	0.230964	0	4	8	0	2	CP258_RS02080	6.5	0	4	0	0.778022	0	0	CP258_RS02080	1436	0.55
4.21978	0.0161049	0.236979	0	6	7	0	4	CP258_RS05575	3.8	0	6	1	0.785348	0	0	CP258_RS05575	1968	0.4
5.01099	0	0.199561	0	1	8	0	6	CP258_RS10505	10	0	1	0	0.732601	0	0	CP258_RS10505	0	0
3.83516	0.185559	0.260745	0	11	7	0	1	CP258_RS03105	3.66667	0	11	2	0.810989	0	0	CP258_RS03105	6104	0.222222
4.71429	0.0433048	0.212121	0	3	8	0	0	CP258_RS06235	5.5	0	3	1	0.752381	0	0	CP258_RS06235	1038	0.5
4.15385	0	0.240741	0	1	8	0	6	CP258_RS09625	15	0	1	0	0.789744	0	0	CP258_RS09625	0	0
4.64835	0.00608931	0.21513	0	3	8	0	0	CP258_RS01920	5	0	3	1	0.756777	0	0	CP258_RS01920	418	0.571429
4.67033	0.00346842	0.214118	0	2	8	0	5	CP258_RS09100	9	0	2	0	0.755311	0	0	CP258_RS09100	224	0.666667
4.38462	0.00554277	0.22807	0	3	8	0	0	CP258_RS03065	7.33333	0	3	0	0.774359	0	0	CP258_RS03065	320	0.422222
3.53846	0.0293635	0.282609	0	2	6	0	5	CP258_RS07920	12	0	2	0	0.830769	0	0	CP258_RS07920	3902	0.611111
4.41758	0.000928625	0.226368	0	2	8	0	5	CP258_RS00460	7.5	0	2	0	0.772161	0	0	CP258_RS00460	240	0.8125
4.31868	0.0260573	0.231552	0	3	7	0	0	CP258_RS05110	4	0	3	1	0.778755	0	0	CP258_RS05110	888	0.6
4.37363	0.00389351	0.228643	0	3	8	0	0	CP258_RS10305	7	0	3	0	0.775092	0	0	CP258_RS10305	736	0.666667
2.71429	0	0.368421	0	1	4	0	6	CP258_RS04655	2	0	1	0	0.657143	0	0	CP258_RS04655	0	0
4.38462	0.00461558	0.22807	0	4	8	0	2	CP258_RS02995	8	0	4	1	0.774359	0	0	CP258_RS02995	362	0.466667
4.1978	0	0.23822	0	1	8	0	6	CP258_RS08765	10	0	1	0	0.786813	0	0	CP258_RS08765	0	0
2.14286	0	0.466667	0	1	3	0	6	CP258_RS06830	5	0	1	0	0.771429	0	0	CP258_RS06830	0	0
4.51648	0	0.221411	0	1	8	0	6	CP258_RS08070	14	0	1	0	0.765568	0	0	CP258_RS08070	0	0
6.18681	0	0.161634	0	1	9	0	6	CP258_RS06720	3	0	1	0	0.654212	0	0	CP258_RS06720	0	0
5.53846	0	0.180556	0	1	9	0	6	CP258_RS09610	4	0	1	0	0.697436	0	0	CP258_RS09610	0	0
2.14286	0	0.466667	0	1	3	0	6	CP258_RS09480	5	0	1	0	0.771429	0	0	CP258_RS09480	0	0
4.13187	0.00266095	0.242021	0	2	8	0	5	CP258_RS04220	9.5	0	2	0	0.791209	0	0	CP258_RS04220	524	0.607143
4.27473	0.0500082	0.233933	0	3	7	0	0	CP258_RS00060	3.66667	0	3	0	0.781685	0	0	CP258_RS00060	1528	0.444444
5.01099	0	0.199561	0	1	8	0	6	CP258_RS10200	10	0	1	0	0.732601	0	0	CP258_RS10200	0	0
4.67033	0.00346842	0.214118	0	2	8	0	5	CP258_RS07770	9	0	2	0	0.755311	0	0	CP258_RS07770	224	0.666667
5.14286	0.0319408	0.194444	0	2	8	0	5	CP258_RS06905	2	0	2	0	0.72381	0	0	CP258_RS06905	804	0.5
4.82418	0	0.207289	0	1	8	0	6	CP258_RS00505	9	0	1	0	0.745055	0	0	CP258_RS00505	0	0
5.36264	0	0.186475	0	1	9	0	6	CP258_RS04215	3	0	1	0	0.709158	0	0	CP258_RS04215	0	0
5.50549	0	0.181637	0	1	9	0	6	CP258_RS10235	6	0	1	0	0.699634	0	0	CP258_RS10235	0	0
4.51648	0	0.221411	0	1	8	0	6	CP258_RS10585	14	0	1	0	0.765568	0	0	CP258_RS10585	0	0
4.74725	0	0.210648	0	1	8	0	6	CP258_RS09760	11	0	1	0	0.750183	0	0	CP258_RS09760	0	0
4.15385	0	0.240741	0	1	8	0	6	CP258_RS06660	15	0	1	0	0.789744	0	0	CP258_RS06660	0	0
4.2967	0.0352566	0.232737	0	3	7	0	0	CP258_RS01760	5	0	3	0	0.78022	0	0	CP258_RS01760	1216	0.363636
5.18681	0	0.192797	0	1	8	0	6	CP258_RS02750	3	0	1	0	0.720879	0	0	CP258_RS02750	0	0
4.1978	0	0.23822	0	1	8	0	6	CP258_RS08470	10	0	1	0	0.786813	0	0	CP258_RS08470	0	0
2.71429	0	0.368421	0	1	4	0	6	CP258_RS00520	2	0	1	0	0.657143	0	0	CP258_RS00520	0	0
5.18681	0	0.192797	0	1	9	0	6	CP258_RS06580	9	0	1	0	0.720879	0	0	CP258_RS06580	0	0
2.14286	0	0.466667	0	1	3	0	6	CP258_RS02365	5	0	1	0	0.771429	0	0	CP258_RS02365	0	0
5.1978	0	0.192389	0	1	9	0	6	CP258_RS08445	5	0	1	0	0.720147	0	0	CP258_RS08445	0	0
4.15385	0	0.240741	0	1	8	0	6	CP258_RS09845	15	0	1	0	0.789744	0	0	CP258_RS09845	0	0
5.12088	0	0.195279	0	1	9	0	6	CP258_RS03910	2	0	1	0	0.725275	0	0	CP258_RS03910	0	0
4.15385	0	0.240741	0	1	8	0	6	CP258_RS02210	15	0	1	0	0.789744	0	0	CP258_RS02210	0	0
4.15385	0	0.240741	0	1	8	0	6	CP258_RS08185	15	0	1	0	0.789744	0	0	CP258_RS08185	0	0
5.28571	0	0.189189	0	1	8	0	6	CP258_RS07255	3	0	1	0	0.714286	0	0	CP258_RS07255	0	0
5.18681	0	0.192797	0	1	9	0	6	CP258_RS08600	9	0	1	0	0.720879	0	0	CP258_RS08600	0	0

## Sheet: Network_analysis_Clusters_CP-1002B
AverageShortestPathLength	BetweennessCentrality	ClosenessCentrality	ClusteringCoefficient	Degree	Eccentricity	IsSingleNode	kmeans Cluster	name	NeighborhoodConnectivity	NumberOfDirectedEdges	NumberOfUndirectedEdges	PartnerOfMultiEdgedNodePairs	Radiality	selected	SelfLoops	shared name	Stress	TopologicalCoefficient
5.79412	0.011224	0.172589	0	5	11	0	0	Cp1002B_RS03055	5.66667	0	5	2	0.700368	0	0	Cp1002B_RS03055	682	0.518519
6.66176	0.00278022	0.15011	0	6	12	0	3	Cp1002B_RS04580	2.2	0	6	1	0.64614	0	0	Cp1002B_RS04580	28	0.6
5.10294	0.0159301	0.195965	0	2	10	0	6	Cp1002B_RS05020	5	0	2	0	0.743566	0	0	Cp1002B_RS05020	628	0.571429
4.86765	0.234728	0.205438	0	12	10	0	5	Cp1002B_RS03075	2.3	0	12	2	0.758272	0	0	Cp1002B_RS03075	4726	0.185714
5.85294	0	0.170854	0	1	11	0	4	Cp1002B_RS03015	10	0	1	0	0.696691	0	0	Cp1002B_RS03015	0	0
3.91176	0.229907	0.255639	0.025	16	8	0	5	Cp1002B_RS02880	2.875	0	16	0	0.818015	0	0	Cp1002B_RS02880	6068	0.2125
4.89706	0	0.204204	0	1	9	0	4	Cp1002B_RS02580	16	0	1	0	0.756434	0	0	Cp1002B_RS02580	0	0
5.82353	0.0046567	0.171717	0	2	11	0	6	Cp1002B_RS05305	7.5	0	2	0	0.698529	0	0	Cp1002B_RS05305	340	0.722222
4.89706	0	0.204204	0	1	9	0	4	Cp1002B_RS05690	16	0	1	0	0.756434	0	0	Cp1002B_RS05690	0	0
4.66176	0.00318908	0.214511	0	2	9	0	6	Cp1002B_RS06870	14.5	0	2	0	0.77114	0	0	Cp1002B_RS06870	136	0.613636
4.66176	0.0048102	0.214511	0	3	9	0	2	Cp1002B_RS09295	10.6667	0	3	0	0.77114	0	0	Cp1002B_RS09295	152	0.460317
3.33824	0.36696	0.299559	0.277778	10	7	0	5	Cp1002B_RS03070	7.66667	0	10	1	0.85386	0	0	Cp1002B_RS03070	7854	0.215873
4.27941	0.000127704	0.233677	0.666667	3	8	0	2	Cp1002B_RS10720	7	0	3	0	0.795037	0	0	Cp1002B_RS10720	4	0.7
5.85294	0.00343869	0.170854	0	4	11	0	0	Cp1002B_RS03180	4.33333	0	4	1	0.696691	0	0	Cp1002B_RS03180	34	0.416667
5.13235	0.00649543	0.194842	0	2	10	0	6	Cp1002B_RS08015	5	0	2	0	0.741728	0	0	Cp1002B_RS08015	322	0.666667
3.98529	0.158512	0.250923	0.025641	15	8	0	5	Cp1002B_RS04495	3.07692	0	15	2	0.813419	0	0	Cp1002B_RS04495	5084	0.230769
4.57353	0.00716154	0.21865	0	3	9	0	2	Cp1002B_RS07605	13.6667	0	3	0	0.776654	0	0	Cp1002B_RS07605	306	0.527778
5.82353	0.0046567	0.171717	0	2	11	0	6	Cp1002B_RS09825	7.5	0	2	0	0.698529	0	0	Cp1002B_RS09825	340	0.722222
4.79412	0.00126139	0.208589	0	2	9	0	6	Cp1002B_RS05005	12.5	0	2	0	0.762868	0	0	Cp1002B_RS05005	60	0.676471
5.82353	0.0046567	0.171717	0	2	11	0	6	Cp1002B_RS06210	7.5	0	2	0	0.698529	0	0	Cp1002B_RS06210	340	0.722222
4.60294	0.0215833	0.217252	0	2	9	0	6	Cp1002B_RS00205	11	0	2	0	0.774816	0	0	Cp1002B_RS00205	552	0.526316
2.68	0.035	0.373134	0	3	5	0	2	Cp1002B_RS04655	8	0	3	1	0.88	0	0	Cp1002B_RS04655	106	0.538462
3.4	0.005	0.294118	0	2	6	0	6	Cp1002B_RS01480	2.5	0	2	0	0.828571	0	0	Cp1002B_RS01480	6	0.75
1.8	0.728333	0.555556	0	16	4	0	5	Cp1002B_RS02920	1.57143	0	16	2	0.942857	0	0	Cp1002B_RS02920	1322	0.190476
4.36	0	0.229358	0	1	7	0	4	Cp1002B_RS02915	2	0	1	0	0.76	0	0	Cp1002B_RS02915	0	0
3.4	0.08	0.294118	0	2	6	0	6	Cp1002B_RS01800	2	0	2	0	0.828571	0	0	Cp1002B_RS01800	114	0.5
4.66176	0.0048102	0.214511	0	3	9	0	2	Cp1002B_RS08575	10.6667	0	3	0	0.77114	0	0	Cp1002B_RS08575	152	0.460317
4.89706	0	0.204204	0	1	9	0	4	Cp1002B_RS06300	16	0	1	0	0.756434	0	0	Cp1002B_RS06300	0	0
4.92647	0.174929	0.202985	0	11	10	0	5	Cp1002B_RS04480	2.11111	0	11	2	0.754596	0	0	Cp1002B_RS04480	4556	0.185185
1	1	1	0	3	1	0	1	Cp1002B_RS03520	1	0	3	0	1	0	0	Cp1002B_RS03520	6	0
1.66667	0	0.6	0	1	2	0	4	Cp1002B_RS10230	3	0	1	0	0.777778	0	0	Cp1002B_RS10230	0	0
4	0.129555	0.25	0.0151515	12	8	0	5	Cp1002B_RS03455	3.08333	0	12	0	0.8125	0	0	Cp1002B_RS03455	3454	0.225
4.98529	0	0.20059	0	1	9	0	4	Cp1002B_RS08490	12	0	1	0	0.750919	0	0	Cp1002B_RS08490	0	0
3.54412	0.10232	0.282158	0.266667	7	7	0	3	Cp1002B_RS00885	8.33333	0	7	1	0.840993	0	0	Cp1002B_RS00885	2926	0.281609
2.2	0.503333	0.454545	0	11	5	0	5	Cp1002B_RS03045	1.54545	0	11	0	0.914286	0	0	Cp1002B_RS03045	1110	0.272727
3.16	0	0.316456	0	1	6	0	4	Cp1002B_RS09275	11	0	1	0	0.845714	0	0	Cp1002B_RS09275	0	0
3.61765	0.485953	0.276423	0	2	7	0	6	Cp1002B_RS03355	5	0	2	0	0.836397	0	0	Cp1002B_RS03355	12144	0.5
3.42647	0.497024	0.291845	0.2	6	6	0	3	Cp1002B_RS01805	5	0	6	1	0.848346	0	0	Cp1002B_RS01805	12488	0.418182
4.11765	0.0230866	0.242857	0	2	7	0	6	Cp1002B_RS01305	9	0	2	0	0.805147	0	0	Cp1002B_RS01305	920	0.615385
6.63235	0.0303629	0.150776	0	4	11	0	0	Cp1002B_RS03505	2.5	0	4	0	0.647978	0	0	Cp1002B_RS03505	1256	0.5
5.76471	0.019681	0.173469	0	3	10	0	2	Cp1002B_RS06735	3.33333	0	3	0	0.702206	0	0	Cp1002B_RS06735	834	0.583333
5.85294	0	0.170854	0	1	11	0	4	Cp1002B_RS00340	10	0	1	0	0.696691	0	0	Cp1002B_RS00340	0	0
2.52	0.188333	0.396825	0	4	5	0	0	Cp1002B_RS00890	6	0	4	1	0.891429	0	0	Cp1002B_RS00890	330	0.357143
2.12	0.0693333	0.471698	0	2	4	0	6	Cp1002B_RS05530	12.5	0	2	0	0.92	0	0	Cp1002B_RS05530	224	0.605263
4.79412	0.00126139	0.208589	0	2	9	0	6	Cp1002B_RS10185	12.5	0	2	0	0.762868	0	0	Cp1002B_RS10185	60	0.676471
4.66176	0.0048102	0.214511	0	3	9	0	2	Cp1002B_RS10100	10.6667	0	3	0	0.77114	0	0	Cp1002B_RS10100	152	0.460317
4.17647	0.412497	0.239437	0	9	9	0	3	Cp1002B_RS02905	4.42857	0	9	2	0.801471	0	0	Cp1002B_RS02905	9372	0.180451
5.13235	0.00649543	0.194842	0	2	10	0	6	Cp1002B_RS08460	5	0	2	0	0.741728	0	0	Cp1002B_RS08460	322	0.666667
2.12	0.0693333	0.471698	0	2	4	0	6	Cp1002B_RS09235	12.5	0	2	0	0.92	0	0	Cp1002B_RS09235	224	0.605263
4.66176	0.00318908	0.214511	0	2	9	0	6	Cp1002B_RS10360	14.5	0	2	0	0.77114	0	0	Cp1002B_RS10360	136	0.613636
3.52941	0.114355	0.283333	0.333333	7	7	0	3	Cp1002B_RS03510	9.66667	0	7	1	0.841912	0	0	Cp1002B_RS03510	3630	0.311828
2.12	0.0693333	0.471698	0	2	4	0	6	Cp1002B_RS06425	12.5	0	2	0	0.92	0	0	Cp1002B_RS06425	224	0.605263
4.89706	0	0.204204	0	1	9	0	4	Cp1002B_RS10150	16	0	1	0	0.756434	0	0	Cp1002B_RS10150	0	0
4.13235	0	0.241993	1	2	8	0	6	Cp1002B_RS07010	12.5	0	2	0	0.804228	0	0	Cp1002B_RS07010	0	0.595238
2.12	0.0693333	0.471698	0	2	4	0	6	Cp1002B_RS06690	12.5	0	2	0	0.92	0	0	Cp1002B_RS06690	224	0.605263
4.86765	0.0681885	0.205438	0	4	9	0	0	Cp1002B_RS03625	3.75	0	4	0	0.758272	0	0	Cp1002B_RS03625	1856	0.458333
4.02941	0.24222	0.248175	0	6	8	0	3	Cp1002B_RS02515	3.5	0	6	0	0.810662	0	0	Cp1002B_RS02515	4588	0.227273
4.98529	0	0.20059	0	1	9	0	4	Cp1002B_RS05990	12	0	1	0	0.750919	0	0	Cp1002B_RS05990	0	0
5.76471	0.0188762	0.173469	0	3	10	0	2	Cp1002B_RS10235	3.66667	0	3	0	0.702206	0	0	Cp1002B_RS10235	830	0.666667
2.76	0	0.362319	0	1	5	0	4	Cp1002B_RS08020	14	0	1	0	0.874286	0	0	Cp1002B_RS08020	0	0
4.89706	0	0.204204	0	1	9	0	4	Cp1002B_RS03620	16	0	1	0	0.756434	0	0	Cp1002B_RS03620	0	0
5.91176	0	0.169154	0	1	11	0	4	Cp1002B_RS08495	9	0	1	0	0.693015	0	0	Cp1002B_RS08495	0	0
4.39706	0.00809607	0.227425	0	4	8	0	0	Cp1002B_RS00730	3.75	0	4	0	0.787684	0	0	Cp1002B_RS00730	324	0.458333
2.76	0	0.362319	0	1	5	0	4	Cp1002B_RS01545	14	0	1	0	0.874286	0	0	Cp1002B_RS01545	0	0
5.61765	0.0150344	0.17801	0	2	11	0	6	Cp1002B_RS00450	9.5	0	2	0	0.711397	0	0	Cp1002B_RS00450	224	0.53125
5.82353	0.0046567	0.171717	0	2	11	0	6	Cp1002B_RS10240	7.5	0	2	0	0.698529	0	0	Cp1002B_RS10240	340	0.722222
4.92647	0.0223881	0.202985	0	2	9	0	6	Cp1002B_RS04835	4.5	0	2	0	0.754596	0	0	Cp1002B_RS04835	614	0.583333
3.16	0	0.316456	0	1	6	0	4	Cp1002B_RS06380	11	0	1	0	0.845714	0	0	Cp1002B_RS06380	0	0
5.76471	0.0188762	0.173469	0	3	10	0	2	Cp1002B_RS08355	3.66667	0	3	0	0.702206	0	0	Cp1002B_RS08355	830	0.666667
2.76	0	0.362319	0	1	5	0	4	Cp1002B_RS00435	14	0	1	0	0.874286	0	0	Cp1002B_RS00435	0	0
4.79412	0.00126139	0.208589	0	2	9	0	6	Cp1002B_RS09720	12.5	0	2	0	0.762868	0	0	Cp1002B_RS09720	60	0.676471
5.16176	0	0.193732	0	1	10	0	4	Cp1002B_RS01525	7	0	1	0	0.73989	0	0	Cp1002B_RS01525	0	0
2.76	0	0.362319	0	1	5	0	4	Cp1002B_RS05385	14	0	1	0	0.874286	0	0	Cp1002B_RS05385	0	0
4.89706	0.0449956	0.204204	0	3	9	0	2	Cp1002B_RS00290	4	0	3	0	0.756434	0	0	Cp1002B_RS00290	1230	0.5
4.79412	0.00126139	0.208589	0	2	9	0	6	Cp1002B_RS04060	12.5	0	2	0	0.762868	0	0	Cp1002B_RS04060	60	0.676471
2.12	0.0693333	0.471698	0	2	4	0	6	Cp1002B_RS10820	12.5	0	2	0	0.92	0	0	Cp1002B_RS10820	224	0.605263
1.66667	0	0.6	0	1	2	0	4	Cp1002B_RS02835	3	0	1	0	0.777778	0	0	Cp1002B_RS02835	0	0
3.16	0	0.316456	0	1	6	0	4	Cp1002B_RS03635	11	0	1	0	0.845714	0	0	Cp1002B_RS03635	0	0
5.91176	0	0.169154	0	1	11	0	4	Cp1002B_RS01535	9	0	1	0	0.693015	0	0	Cp1002B_RS01535	0	0
2.76	0	0.362319	0	1	5	0	4	Cp1002B_RS04955	14	0	1	0	0.874286	0	0	Cp1002B_RS04955	0	0
3.16	0	0.316456	0	1	6	0	4	Cp1002B_RS06770	11	0	1	0	0.845714	0	0	Cp1002B_RS06770	0	0
3.16	0	0.316456	0	1	6	0	4	Cp1002B_RS05960	11	0	1	0	0.845714	0	0	Cp1002B_RS05960	0	0
5.01471	0	0.199413	0	1	9	0	4	Cp1002B_RS00200	6	0	1	0	0.749081	0	0	Cp1002B_RS00200	0	0
4.58824	0.0707858	0.217949	0	3	9	0	2	Cp1002B_RS00845	7	0	3	1	0.775735	0	0	Cp1002B_RS00845	2272	0.545455
4.97059	0	0.201183	0	1	9	0	4	Cp1002B_RS04795	13	0	1	0	0.751838	0	0	Cp1002B_RS04795	0	0
5.91176	0	0.169154	0	1	11	0	4	Cp1002B_RS00650	9	0	1	0	0.693015	0	0	Cp1002B_RS00650	0	0
7.61765	0	0.131274	0	1	12	0	4	Cp1002B_RS01045	4	0	1	0	0.586397	0	0	Cp1002B_RS01045	0	0
3.08	0.08	0.324675	0	2	6	0	6	Cp1002B_RS02810	6	0	2	0	0.851429	0	0	Cp1002B_RS02810	162	0.5
2.76	0	0.362319	0	1	5	0	4	Cp1002B_RS02045	14	0	1	0	0.874286	0	0	Cp1002B_RS02045	0	0
2.76	0	0.362319	0	1	5	0	4	Cp1002B_RS00895	14	0	1	0	0.874286	0	0	Cp1002B_RS00895	0	0
1	0	1	0	1	1	0	4	Cp1002B_RS00815	1	0	1	0	1	0	0	Cp1002B_RS00815	0	0
1	0	1	0	1	1	0	4	Cp1002B_RS01665	1	0	1	0	1	0	0	Cp1002B_RS01665	0	0
5.91176	0	0.169154	0	1	11	0	4	Cp1002B_RS01835	9	0	1	0	0.693015	0	0	Cp1002B_RS01835	0	0
3.83824	0.50333	0.260536	0	6	8	0	3	Cp1002B_RS01810	2.6	0	6	1	0.82261	0	0	Cp1002B_RS01810	12162	0.228571
4.82353	0	0.207317	0	1	9	0	4	Cp1002B_RS00360	5	0	1	0	0.761029	0	0	Cp1002B_RS00360	0	0
4.97059	0	0.201183	0	1	9	0	4	Cp1002B_RS02640	13	0	1	0	0.751838	0	0	Cp1002B_RS02640	0	0
1	0	1	0	1	1	0	4	Cp1002B_RS01830	1	0	1	0	1	0	0	Cp1002B_RS01830	0	0
1	0	1	0	1	1	0	4	Cp1002B_RS06375	1	0	1	0	1	0	0	Cp1002B_RS06375	0	0
5.91176	0	0.169154	0	1	11	0	4	Cp1002B_RS09915	9	0	1	0	0.693015	0	0	Cp1002B_RS09915	0	0
4.82353	0	0.207317	0	1	9	0	4	Cp1002B_RS05070	5	0	1	0	0.761029	0	0	Cp1002B_RS05070	0	0
5.85294	0	0.170854	0	1	11	0	4	Cp1002B_RS04860	10	0	1	0	0.696691	0	0	Cp1002B_RS04860	0	0
1.66667	0	0.6	0	1	2	0	4	Cp1002B_RS06280	3	0	1	0	0.777778	0	0	Cp1002B_RS06280	0	0
4.04	0	0.247525	0	1	7	0	4	Cp1002B_RS05230	2	0	1	0	0.782857	0	0	Cp1002B_RS05230	0	0
1	0	1	0	1	1	0	4	Cp1002B_RS00390	1	0	1	0	1	0	0	Cp1002B_RS00390	0	0
1	0	1	0	1	1	0	4	Cp1002B_RS06480	1	0	1	0	1	0	0	Cp1002B_RS06480	0	0

## Sheet: Network_analysis_Clusters_CP-T1
AverageShortestPathLength	BetweennessCentrality	ClosenessCentrality	ClusteringCoefficient	Degree	Eccentricity	IsSingleNode	kmeans Cluster	name	NeighborhoodConnectivity	NumberOfDirectedEdges	NumberOfUndirectedEdges	PartnerOfMultiEdgedNodePairs	Radiality	selected	SelfLoops	shared name	Stress	TopologicalCoefficient
2.42623	0.523445	0.412162	0.004329	25	5	FALSE	0	CpCpT1_RS02380	2.09091	0	25	3	0.935171	FALSE	0	CpCpT1_RS02380	7630	0.0844156
3.40984	0	0.293269	0	1	6	FALSE	3	CpCpT1_RS07365	22	0	1	0	0.890462	FALSE	0	CpCpT1_RS07365	0	0
2.62295	0.157305	0.38125	0	7	6	FALSE	2	CpCpT1_RS02285	8.75	0	7	3	0.92623	FALSE	0	CpCpT1_RS02285	3108	0.298077
3.40984	0	0.293269	0	1	6	FALSE	3	CpCpT1_RS01180	22	0	1	0	0.890462	FALSE	0	CpCpT1_RS01180	0	0
2.95082	0.359905	0.338889	0.0285714	19	6	FALSE	0	CpCpT1_RS02910	2.13333	0	19	4	0.911326	FALSE	0	CpCpT1_RS02910	5966	0.107692
2.96721	0.0697633	0.337017	0.333333	4	7	FALSE	4	CpCpT1_RS01230	8.66667	0	4	1	0.910581	FALSE	0	CpCpT1_RS01230	1416	0.416667
3.40984	0	0.293269	0	1	6	FALSE	3	CpCpT1_RS04425	22	0	1	0	0.890462	FALSE	0	CpCpT1_RS04425	0	0
2.67213	0.08474	0.374233	0	6	5	FALSE	2	CpCpT1_RS02790	8.25	0	6	2	0.923994	FALSE	0	CpCpT1_RS02790	1716	0.29
2.91803	0.0573937	0.342697	0	2	5	FALSE	1	CpCpT1_RS05380	9.5	0	2	0	0.912817	FALSE	0	CpCpT1_RS05380	1288	0.5
4.2459	0.00551893	0.235521	0	2	7	FALSE	1	CpCpT1_RS02375	3.5	0	2	0	0.852459	FALSE	0	CpCpT1_RS02375	120	0.625
3.32787	0.0729519	0.300493	0	4	6	FALSE	4	CpCpT1_RS03075	4	0	4	0	0.894188	FALSE	0	CpCpT1_RS03075	968	0.3
3.67213	0.0776631	0.272321	0	4	7	FALSE	4	CpCpT1_RS02270	5	0	4	0	0.878539	FALSE	0	CpCpT1_RS02270	1992	0.363636
3.70492	0.0908241	0.269912	0	7	7	FALSE	2	CpCpT1_RS04105	2.71429	0	7	0	0.877049	FALSE	0	CpCpT1_RS04105	3132	0.244898
3.21311	0.0188448	0.311224	0	6	5	FALSE	2	CpCpT1_RS02400	3.25	0	6	2	0.899404	FALSE	0	CpCpT1_RS02400	614	0.375
2.60656	0.288421	0.383648	0	8	5	FALSE	2	CpCpT1_RS04110	5.83333	0	8	2	0.926975	FALSE	0	CpCpT1_RS04110	5244	0.210145
3.90164	0.00061367	0.256303	0	3	7	FALSE	4	CpCpT1_RS03560	5.5	0	3	1	0.868107	FALSE	0	CpCpT1_RS03560	16	0.75
3.08197	0.0619664	0.324468	0	5	6	FALSE	4	CpCpT1_RS07530	4.2	0	5	0	0.905365	FALSE	0	CpCpT1_RS07530	1500	0.32
3.40984	0	0.293269	0	1	6	FALSE	3	CpCpT1_RS07320	22	0	1	0	0.890462	FALSE	0	CpCpT1_RS07320	0	0
4.68852	0	0.213287	0	1	8	FALSE	3	CpCpT1_RS09905	7	0	1	0	0.83234	FALSE	0	CpCpT1_RS09905	0	0
3.93443	0	0.254167	0	2	7	FALSE	1	CpCpT1_RS01235	15	0	2	1	0.866617	FALSE	0	CpCpT1_RS01235	0	0
3.40984	0	0.293269	0	1	6	FALSE	3	CpCpT1_RS10645	22	0	1	0	0.890462	FALSE	0	CpCpT1_RS10645	0	0
3.93443	0	0.254167	0	1	7	FALSE	3	CpCpT1_RS01615	15	0	1	0	0.866617	FALSE	0	CpCpT1_RS01615	0	0
2.98361	0.0413472	0.335165	0	2	6	FALSE	1	CpCpT1_RS02260	12	0	2	0	0.909836	FALSE	0	CpCpT1_RS02260	484	0.5
3.40984	0	0.293269	0	1	6	FALSE	3	CpCpT1_RS07865	22	0	1	0	0.890462	FALSE	0	CpCpT1_RS07865	0	0
3.40984	0	0.293269	0	1	6	FALSE	3	CpCpT1_RS10005	22	0	1	0	0.890462	FALSE	0	CpCpT1_RS10005	0	0
3.08197	0.0641768	0.324468	0	5	6	FALSE	4	CpCpT1_RS02280	9	0	5	1	0.905365	FALSE	0	CpCpT1_RS02280	1530	0.307692
3.04918	0.0857328	0.327957	0	7	6	FALSE	2	CpCpT1_RS03205	4.16667	0	7	1	0.906855	FALSE	0	CpCpT1_RS03205	2248	0.316667
3.40984	0	0.293269	0	1	6	FALSE	3	CpCpT1_RS02255	22	0	1	0	0.890462	FALSE	0	CpCpT1_RS02255	0	0
3.08197	0.0641768	0.324468	0	4	6	FALSE	4	CpCpT1_RS10010	9	0	4	0	0.905365	FALSE	0	CpCpT1_RS10010	1530	0.307692
2.95082	0	0.338889	1	2	6	FALSE	1	CpCpT1_RS01455	14.5	0	2	0	0.911326	FALSE	0	CpCpT1_RS01455	0	0.537037
3.40984	0	0.293269	0	1	6	FALSE	3	CpCpT1_RS08080	22	0	1	0	0.890462	FALSE	0	CpCpT1_RS08080	0	0
3.59016	0	0.278539	0	1	6	FALSE	3	CpCpT1_RS03070	6	0	1	0	0.882265	FALSE	0	CpCpT1_RS03070	0	0
2.45902	0.195518	0.406667	0.0952381	7	5	FALSE	2	CpCpT1_RS02265	6.57143	0	7	0	0.933681	FALSE	0	CpCpT1_RS02265	3376	0.204762
3.2459	0.103987	0.308081	0.142857	8	7	FALSE	2	CpCpT1_RS02295	4.42857	0	8	1	0.897914	FALSE	0	CpCpT1_RS02295	1124	0.2
3.80328	0	0.262931	1	2	7	FALSE	1	CpCpT1_RS01595	11	0	2	0	0.872578	FALSE	0	CpCpT1_RS01595	0	0.611111
3.40984	0	0.293269	0	1	6	FALSE	3	CpCpT1_RS10740	22	0	1	0	0.890462	FALSE	0	CpCpT1_RS10740	0	0
4.16393	0.0366803	0.240157	0	3	8	FALSE	4	CpCpT1_RS07275	3.33333	0	3	0	0.856185	FALSE	0	CpCpT1_RS07275	410	0.388889
3.18033	0.0281739	0.314433	0	3	6	FALSE	4	CpCpT1_RS09900	11	0	3	0	0.900894	FALSE	0	CpCpT1_RS09900	1108	0.416667
3.08197	0.0541336	0.324468	0	4	5	FALSE	4	CpCpT1_RS02895	5	0	4	0	0.905365	FALSE	0	CpCpT1_RS02895	1306	0.363636
3.39344	0.00191517	0.294686	0.333333	3	6	FALSE	4	CpCpT1_RS03720	4.33333	0	3	0	0.891207	FALSE	0	CpCpT1_RS03720	40	0.571429
3.21311	0.0168714	0.311224	0	2	6	FALSE	1	CpCpT1_RS10530	14.5	0	2	0	0.899404	FALSE	0	CpCpT1_RS10530	684	0.5625
4.68852	0	0.213287	0	1	8	FALSE	3	CpCpT1_RS07315	7	0	1	0	0.83234	FALSE	0	CpCpT1_RS07315	0	0
3.93443	0	0.254167	0	1	7	FALSE	3	CpCpT1_RS10255	15	0	1	0	0.866617	FALSE	0	CpCpT1_RS10255	0	0
3.40984	0	0.293269	0	1	6	FALSE	3	CpCpT1_RS08075	22	0	1	0	0.890462	FALSE	0	CpCpT1_RS08075	0	0
3.93443	0	0.254167	0	1	7	FALSE	3	CpCpT1_RS09590	15	0	1	0	0.866617	FALSE	0	CpCpT1_RS09590	0	0
3.37705	0.00303344	0.296117	0	2	6	FALSE	1	CpCpT1_RS02275	13	0	2	0	0.891952	FALSE	0	CpCpT1_RS02275	54	0.571429
4.06557	0	0.245968	0	1	7	FALSE	3	CpCpT1_RS07765	4	0	1	0	0.860656	FALSE	0	CpCpT1_RS07765	0	0
3.93443	0	0.254167	0	1	7	FALSE	3	CpCpT1_RS00620	15	0	1	0	0.866617	FALSE	0	CpCpT1_RS00620	0	0
3.40984	0	0.293269	1	2	6	FALSE	1	CpCpT1_RS10635	5	0	2	0	0.890462	FALSE	0	CpCpT1_RS10635	0	0.625
4.06557	0	0.245968	0	1	7	FALSE	3	CpCpT1_RS01225	4	0	1	0	0.860656	FALSE	0	CpCpT1_RS01225	0	0
3.93443	0	0.254167	0	1	7	FALSE	3	CpCpT1_RS08335	15	0	1	0	0.866617	FALSE	0	CpCpT1_RS08335	0	0
3.93443	0	0.254167	0	1	7	FALSE	3	CpCpT1_RS08935	15	0	1	0	0.866617	FALSE	0	CpCpT1_RS08935	0	0
5.14754	0	0.194268	0	1	9	FALSE	3	CpCpT1_RS00890	3	0	1	0	0.811475	FALSE	0	CpCpT1_RS00890	0	0
3.90164	0.0327869	0.256303	0	2	7	FALSE	1	CpCpT1_RS01035	8	0	2	0	0.868107	FALSE	0	CpCpT1_RS01035	484	0.5
3.93443	0	0.254167	0	1	7	FALSE	3	CpCpT1_RS10090	15	0	1	0	0.866617	FALSE	0	CpCpT1_RS10090	0	0
3.40984	0	0.293269	0	1	6	FALSE	3	CpCpT1_RS10410	22	0	1	0	0.890462	FALSE	0	CpCpT1_RS10410	0	0
3.80328	0	0.262931	1	2	7	FALSE	1	CpCpT1_RS01605	11	0	2	0	0.872578	FALSE	0	CpCpT1_RS01605	0	0.611111
3.2459	0.0327133	0.308081	0	2	7	FALSE	1	CpCpT1_RS00570	4.5	0	2	0	0.897914	FALSE	0	CpCpT1_RS00570	368	0.5
4.88525	0	0.204698	0	1	8	FALSE	3	CpCpT1_RS08505	2	0	1	0	0.823398	FALSE	0	CpCpT1_RS08505	0	0
5.60656	0	0.178363	0	1	9	FALSE	3	CpCpT1_RS03715	2	0	1	0	0.790611	FALSE	0	CpCpT1_RS03715	0	0
4.62295	0.0327869	0.216312	0	2	8	FALSE	1	CpCpT1_RS01080	2.5	0	2	0	0.83532	FALSE	0	CpCpT1_RS01080	670	0.5
4.31148	0	0.231939	0	1	7	FALSE	3	CpCpT1_RS01610	4	0	1	0	0.849478	FALSE	0	CpCpT1_RS01610	0	0
