# Supplementary material for: Co-Expression Networks for Causal Gene Identification Based on RNA-seq Data of C<em>orynebacterium Pseudotuberculosis</em>
Source: Preprints.org preprint supplement (doi:10.20944/preprints202006.0144.v1), 2020-06-12
Supplement: Supplementary file 5 [file Datasheet 1-Differentially expressed genes_Gfold_CP-1002.xlsx]

## Sheet: Gfold_ControlvsOsmosis
#GeneSymbol	GeneName	GFOLD(0.01)	E-FDR	log2fdc	1stTPM	2ndTPM
gene-Cp1002B_RS01480	NA	-3.63439	1	-6.42802	24.5933	0
gene-Cp1002B_RS05020	NA	-3.36809	1	-3.86813	3492.74	171.035
gene-Cp1002B_RS04480	NA	-2.73186	1	-2.97166	9481.34	879.608
gene-Cp1002B_RS03455	NA	-2.69721	1	-3.94171	122.495	5.28679
gene-Cp1002B_RS02920	NA	-2.61435	1	-2.64774	268466	31293.7
gene-Cp1002B_RS02835	NA	-2.58307	1	-2.76575	918.098	98.4146
gene-Cp1002B_RS04495	NA	-2.52837	1	-2.83944	5004.17	507.532
gene-Cp1002B_RS00615	NA	-2.48001	1	-2.97086	2163.27	198.146
gene-Cp1002B_RS04580	NA	-2.45936	1	-2.82968	3607.95	367.396
gene-Cp1002B_RS09385	NA	-2.22665	1	-2.78709	97.2422	10.0721
gene-Cp1002B_RS10240	NA	-2.1006	1	-2.42571	170.36	23.0234
gene-Cp1002B_RS08015	NA	-2.08667	1	-2.4354	3122.47	418.755
gene-Cp1002B_RS01470	NA	-2.03728	1	-2.4662	140.968	18.4335
gene-Cp1002B_RS01045	NA	-1.9952	1	-2.31698	389.852	56.833
gene-Cp1002B_RS02580	NA	-1.97071	1	-2.14573	1276.66	210.443
gene-Cp1002B_RS01800	NA	-1.77926	1	-3.57558	6.85347	0.290735
gene-Cp1002B_RS01810	NA	-1.77926	1	-3.57558	14.4383	0.612494
gene-Cp1002B_RS02205	NA	-1.77926	1	-3.57558	14.8456	0.629775
gene-Cp1002B_RS10720	NA	-1.70398	1	-2.15108	1060.17	172.566
gene-Cp1002B_RS10245	NA	-1.67016	1	-2.37651	54.8695	7.48689
gene-Cp1002B_RS02830	NA	-1.58396	1	-2.01604	343.214	61.4316
gene-Cp1002B_RS09915	NA	-1.56995	1	-2.18326	104.711	16.4989
gene-Cp1002B_RS10235	NA	-1.56995	1	-2.18326	83.6878	13.1864
gene-Cp1002B_RS03180	NA	-1.46435	1	-2.02304	53.9985	9.55599
gene-Cp1002B_RS01525	NA	-1.42978	1	-2.05966	681.433	116.994
gene-Cp1002B_RS05120	NA	-1.28591	1	-2.94171	34.2284	2.69662
gene-Cp1002B_RS06280	NA	-1.23603	1	-2.82069	12.6037	1.12108
gene-Cp1002B_RS06300	NA	-1.21596	1	-2.01334	31.0137	5.42968
gene-Cp1002B_RS00390	NA	-1.2048	1	-2.57558	40.2731	4.54292
gene-Cp1002B_RS03045	NA	-1.18655	1	-3.21301	15.082	0.639803
gene-Cp1002B_RS05230	NA	-1.17427	1	-2.59328	16.521	1.8222
gene-Cp1002B_RS10335	NA	-1.07422	1	-2.33854	13.9327	1.87405
gene-Cp1002B_RS10260	NA	-1.04029	1	-2.05773	25.4292	4.23973
gene-Cp1002B_RS00815	NA	-1.00319	1	-2.44518	27.4359	3.36231
gene-Cp1002B_RS10230	NA	-0.967085	1	-2.36913	22.6934	2.96407
gene-Cp1002B_RS01720	NA	-0.966856	1	-2.14262	46.1274	7.17493
gene-Cp1002B_RS03040	NA	-0.96544	1	-2.66869	9.7653	0.936588
gene-Cp1002B_RS08460	NA	-0.95714	1	-2.40566	251.646	31.7208
gene-Cp1002B_RS09230	NA	-0.861948	1	-2.15568	11.9875	1.83636
gene-Cp1002B_RS03620	NA	-0.832162	1	-2.25365	23.699	3.36075
gene-Cp1002B_RS02410	NA	-0.780158	1	-2.72758	18.3454	1.44531
gene-Cp1002B_RS00800	NA	-0.756235	1	-2.86509	7.10575	0.391869
gene-Cp1002B_RS02200	NA	-0.756235	1	-3.86509	11.3133	0
gene-Cp1002B_RS01805	NA	-0.521277	1	-2.52113	6.29893	0.578957
gene-Cp1002B_RS06375	NA	-0.5107	1	-2.21301	18.7777	2.58889
gene-Cp1002B_RS00290	NA	-0.459011	1	-2.25365	6.94271	0.900888
gene-Cp1002B_RS00200	NA	-0.208635	1	-2.28013	10.2906	1.13502
gene-Cp1002B_RS02515	NA	-0.208635	1	-2.28013	11.9832	1.3217
gene-Cp1002B_RS03075	NA	-0.208635	1	-2.28013	4.85718	0.535728
gene-Cp1002B_RS08455	NA	-0.189922	1	-3.40566	3.806	0
gene-Cp1002B_RS10300	NA	0.102592	1	2.17931	3.03573	18.4157
gene-Cp1002B_RS04795	NA	0.245153	1	2.29478	1.78573	11.8175
gene-Cp1002B_RS05975	NA	0.354619	1	2.0273	2.22127	7.96242
gene-Cp1002B_RS00535	NA	0.423059	1	2.17931	3.57145	15.1002
gene-Cp1002B_RS08480	NA	0.688154	1	2.11791	3.41825	12.1185
gene-Cp1002B_RS02575	NA	0.703824	1	2.53294	1.80341	10.94
gene-Cp1002B_RS00445	NA	0.708259	1	3.68181	0	16.5689
gene-Cp1002B_RS02045	NA	0.708259	1	3.68181	0	4.21833
gene-Cp1002B_RS09235	NA	0.805495	1	2.1304	12.7077	44.3845
gene-Cp1002B_RS10820	NA	0.831932	1	2.36693	4.01198	17.7003
gene-Cp1002B_RS03645	NA	0.841332	1	2.31055	4.03271	16.6797
gene-Cp1002B_RS08925	NA	0.886097	1	2.20315	11.7093	43.0496
gene-Cp1002B_RS00850	NA	0.998104	1	2.68181	1.48487	9.00766
gene-Cp1002B_RS06915	NA	1.05988	1	2.98666	1.25617	13.855
gene-Cp1002B_RS06425	NA	1.11732	1	2.69868	1.12783	6.53074
gene-Cp1002B_RS01330	NA	1.1486	1	2.21883	7.47606	27.3611
gene-Cp1002B_RS09325	NA	1.15014	1	2.65324	4.33676	23.4381
gene-Cp1002B_RS09205	NA	1.17802	1	2.51188	7.10806	32.8297
gene-Cp1002B_RS05070	NA	1.2448	1	2.01884	22.9272	70.9465
gene-Cp1002B_RS06540	NA	1.29173	1	3.05378	1.42858	12.6054
gene-Cp1002B_RS00845	NA	1.29722	1	2.45684	2.5158	10.9606
gene-Cp1002B_RS06800	NA	1.3357	1	2.49246	4.24578	18.9659
gene-Cp1002B_RS06620	NA	1.3459	1	2.06565	8.46245	26.8901
gene-Cp1002B_RS06590	NA	1.36526	1	2.15234	16.7376	57.0116
gene-Cp1002B_RS03650	NA	1.38437	1	2.86736	2.25426	14.1723
gene-Cp1002B_RS06690	NA	1.38956	1	2.09315	11.6487	37.6684
gene-Cp1002B_RS04955	NA	1.41867	1	2.13491	26.7484	89.21
gene-Cp1002B_RS00895	NA	1.43009	1	3.17931	5.27954	50.9524
gene-Cp1002B_RS04960	NA	1.50232	1	2.2824	15.2534	56.9046
gene-Cp1002B_RS07735	NA	1.5538	1	2.29478	11.6917	43.7768
gene-Cp1002B_RS08035	NA	1.59956	1	2.3385	3.0626	11.8228
gene-Cp1002B_RS08020	NA	1.603	1	2.08683	12.7018	40.0675
gene-Cp1002B_RS00360	NA	1.62976	1	2.52846	6.6327	29.8252
gene-Cp1002B_RS03635	NA	1.71547	1	2.03246	46.5774	140.127
gene-Cp1002B_RS07785	NA	1.72496	1	2.16371	115.737	384.008
gene-Cp1002B_RS01545	NA	1.73556	1	2.48597	30.0788	129.017
gene-Cp1002B_RS02070	NA	1.74526	1	3.46881	0.680065	8.06343
gene-Cp1002B_RS00435	NA	1.78719	1	2.32226	73.2332	273.387
gene-Cp1002B_RS05530	NA	1.85884	1	2.20526	124.756	423.812
gene-Cp1002B_RS06600	NA	2.04367	1	2.72183	32.0574	160.718
gene-Cp1002B_RS00890	NA	2.11791	1	2.80734	15.0592	80.2801
gene-Cp1002B_RS03640	NA	2.14413	1	3.25385	5.692	43.3187
gene-Cp1002B_RS08930	NA	2.14651	1	2.25968	273.078	956.166
gene-Cp1002B_RS05095	NA	2.14652	1	2.266	1583.94	5570.98
gene-Cp1002B_RS05385	NA	2.2198	1	2.71103	18.5441	90.4496
gene-Cp1002B_RS02915	NA	2.2326	1	2.24828	9396.97	32616.6
gene-Cp1002B_RS06370	NA	2.49126	1	2.70938	292.606	1403.05
gene-Cp1002B_RS08025	NA	2.71026	1	3.11236	23.2894	149.14
gene-Cp1002B_RS00650	NA	2.93449	1	5.72363	0	288.791
gene-Cp1002B_RS04655	NA	3.52636	1	4.36442	14.6165	236.241

## Sheet: Gfold_ControlvsHeat
GeneSymbol	GeneName	GFOLD(0.01)	E-FDR	log2fdc	1stTPM	2ndTPM
gene-Cp1002B_RS09825	NA	-1.63537	1	-1.91265	4154.38	943.801
gene-Cp1002B_RS01470	NA	-1.56969	1	-1.95316	140.968	31.0296
gene-Cp1002B_RS10240	NA	-1.52018	1	-1.80276	170.36	41.7696
gene-Cp1002B_RS05490	NA	-1.50124	1	-2.20245	686.732	124.471
gene-Cp1002B_RS02830	NA	-1.4106	1	-1.82995	343.214	82.2129
gene-Cp1002B_RS01835	NA	-1.38518	1	-1.56598	444.447	128.698
gene-Cp1002B_RS02835	NA	-1.37796	1	-1.51226	918.098	276.093
gene-Cp1002B_RS03455	NA	-1.35838	1	-1.95835	122.495	26.5733
gene-Cp1002B_RS05305	NA	-1.25322	1	-1.68458	164.175	43.5073
gene-Cp1002B_RS10245	NA	-1.20075	1	-1.83372	54.8695	12.9677
gene-Cp1002B_RS10250	NA	-1.19341	1	-1.81127	27.1336	6.52098
gene-Cp1002B_RS10235	NA	-1.17023	1	-1.73162	83.6878	21.338
gene-Cp1002B_RS10710	NA	-1.12919	1	-3.15565	19.7323	1.02343
gene-Cp1002B_RS06210	NA	-0.999106	1	-3.04874	32.1431	1.80606
gene-Cp1002B_RS03040	NA	-0.90808	1	-2.61133	9.7653	1.1451
gene-Cp1002B_RS01480	NA	-0.833848	1	-1.56331	24.5933	6.99561
gene-Cp1002B_RS08495	NA	-0.598934	1	-2.57069	13.6871	1.41979
gene-Cp1002B_RS01800	NA	-0.547394	1	-2.10318	6.85347	1.24411
gene-Cp1002B_RS06280	NA	-0.53098	1	-1.76333	12.6037	3.01547
gene-Cp1002B_RS00450	NA	-0.356648	1	-2.51822	15.3384	1.29276
gene-Cp1002B_RS00340	NA	-0.297741	1	-2.11383	14.8689	2.50636
gene-Cp1002B_RS08455	NA	-0.132562	1	-2.3483	3.806	0.366603
gene-Cp1002B_RS02410	NA	-0.0658076	1	-1.93326	18.3454	3.53415
gene-Cp1002B_RS03055	NA	-0.0374803	1	-1.6378	15.9376	4.09373
gene-Cp1002B_RS06425	NA	0.0609875	1	1.78921	1.12783	3.99234
gene-Cp1002B_RS10300	NA	0.159952	1	2.23667	3.03573	22.5155
gene-Cp1002B_RS00255	NA	0.168131	1	1.97363	3.10473	13.2581
gene-Cp1002B_RS02810	NA	0.255512	1	1.6517	3.4152	9.97846
gene-Cp1002B_RS02070	NA	0.438888	1	2.31467	0.680065	4.12684
gene-Cp1002B_RS03740	NA	0.662753	1	2.6517	0.639102	6.46378
gene-Cp1002B_RS06600	NA	0.885071	1	1.62	32.0574	87.442
gene-Cp1002B_RS03510	NA	1.30627	1	1.67384	81.3295	224.489
gene-Cp1002B_RS04065	NA	1.35793	1	1.88095	13.7467	44.2375
gene-Cp1002B_RS03515	NA	1.39316	1	1.6961	65.6086	183.444
gene-Cp1002B_RS04655	NA	1.43874	1	2.35214	14.6165	68.2288
gene-Cp1002B_RS03520	NA	1.4664	1	2.05609	44.8564	164.055
gene-Cp1002B_RS02915	NA	2.78104	1	2.79641	9396.97	56036.3

## Sheet: Gfold_ControlvsAcid
GeneSymbol	GeneName	GFOLD(0.01)	E-FDR	log2fdc	1stTPM	2ndTPM
gene-Cp1002B_RS00650	NA	4.60252	1	7.34647	0	823.346
gene-Cp1002B_RS03625	NA	4.75145	1	5.03222	28.2859	623.618
gene-Cp1002B_RS08575	NA	3.1491	1	3.94482	10.4509	115.056
gene-Cp1002B_RS07010	NA	2.72455	1	3.6997	14.6247	138.168
gene-Cp1002B_RS05740	NA	0.535887	1	3.46266	0	16.8287
gene-Cp1002B_RS10150	NA	2.95311	1	3.13947	360.956	2133.33
gene-Cp1002B_RS09295	NA	2.40855	1	3.07852	17.6268	104.028
gene-Cp1002B_RS04795	NA	1.00033	1	2.8777	1.78573	16.9277
gene-Cp1002B_RS10185	NA	1.11093	1	2.84294	1.03786	7.28766
gene-Cp1002B_RS10040	NA	1.38606	1	2.77079	8.74292	46.0434
gene-Cp1002B_RS03505	NA	2.6626	1	2.76786	316.889	1444.67
gene-Cp1002B_RS00205	NA	1.42533	1	2.70778	13.4922	65.7256
gene-Cp1002B_RS03355	NA	0.949443	1	2.69484	5.87562	37.1318
gene-Cp1002B_RS07605	NA	2.41997	1	2.66825	35.6537	152.322
gene-Cp1002B_RS00850	NA	1.02246	1	2.65531	1.48487	8.16742
gene-Cp1002B_RS03510	NA	2.30518	1	2.64411	81.3295	343.244
gene-Cp1002B_RS02640	NA	1.76014	1	2.62931	25.1901	111.571
gene-Cp1002B_RS02070	NA	0.861422	1	2.61467	0.680065	4.059
gene-Cp1002B_RS05685	NA	0.684349	1	2.59391	2.71857	20.9982
gene-Cp1002B_RS03070	NA	1.45936	1	2.5767	2.78083	12.1064
gene-Cp1002B_RS05690	NA	0.612004	1	2.52978	2.49512	18.3963
gene-Cp1002B_RS06540	NA	0.614807	1	2.39227	1.42858	7.27265
gene-Cp1002B_RS06870	NA	2.06809	1	2.36539	74.8299	259.666
gene-Cp1002B_RS09720	NA	0.370591	1	2.31827	0.795389	5.02657
gene-Cp1002B_RS10540	NA	0.889831	1	2.30739	32.1431	122.256
gene-Cp1002B_RS00885	NA	2.02088	1	2.26742	68.1709	220.519
gene-Cp1002B_RS00845	NA	1.08753	1	2.22562	2.5158	8.56778
gene-Cp1002B_RS02915	NA	2.15255	1	2.16794	9396.97	28241.1
gene-Cp1002B_RS05620	NA	0.474107	1	2.15781	6.28083	24.2566
gene-Cp1002B_RS05005	NA	1.26757	1	2.15781	9.14237	29.1352
gene-Cp1002B_RS10360	NA	0.713946	1	2.14563	2.62078	8.89461
gene-Cp1002B_RS01305	NA	1.83557	1	2.09588	76.7387	220.493
gene-Cp1002B_RS08490	NA	1.12744	1	2.08415	20.2382	61.5807
gene-Cp1002B_RS00370	NA	1.18893	1	2.08317	17.0351	51.5274
gene-Cp1002B_RS06915	NA	0.0813955	1	2.07035	1.25617	6.61543
gene-Cp1002B_RS10100	NA	0.0813955	1	2.07035	2.98597	15.7252
gene-Cp1002B_RS10300	NA	0.0813955	1	2.07035	3.03573	15.9873
gene-Cp1002B_RS06600	NA	1.38784	1	2.07035	32.0574	93.6216
gene-Cp1002B_RS05990	NA	0.885726	1	2.03718	13.7988	41.1794
gene-Cp1002B_RS07120	NA	1.32244	1	2.03558	18.7777	53.7305
gene-Cp1002B_RS01535	NA	1.93054	1	2.02594	10351.9	28212.3
gene-Cp1002B_RS04835	NA	1.16979	1	2.02144	7.65771	22.0846
gene-Cp1002B_RS04060	NA	0.963314	1	2.00895	8.98469	26.0959
gene-Cp1002B_RS08000	NA	-1.43895	1	-2.00004	131.549	21.7605
gene-Cp1002B_RS06380	NA	-1.28012	1	-2.00004	67.2198	11.0388
gene-Cp1002B_RS10240	NA	-1.78368	1	-2.04513	170.36	27.5419
gene-Cp1002B_RS09275	NA	-1.23648	1	-2.04995	90.1521	14.2109
gene-Cp1002B_RS05445	NA	-1.22059	1	-2.10799	29.5369	4.44435
gene-Cp1002B_RS10235	NA	-1.64559	1	-2.19269	83.6878	12.0985
gene-Cp1002B_RS01480	NA	-1.45997	1	-2.19713	24.5933	3.50776
gene-Cp1002B_RS05120	NA	-0.941257	1	-2.20267	34.2284	4.72108
gene-Cp1002B_RS01045	NA	-1.92923	1	-2.20513	389.852	56.3763
gene-Cp1002B_RS10720	NA	-1.82061	1	-2.22338	1060.17	150.855
gene-Cp1002B_RS01810	NA	-0.840852	1	-2.22511	14.4383	1.94967
gene-Cp1002B_RS02880	NA	-1.39929	1	-2.26669	35.5219	4.77629
gene-Cp1002B_RS04860	NA	-1.83094	1	-2.2702	160.618	22.0915
gene-Cp1002B_RS06770	NA	-1.59699	1	-2.27924	55.934	7.55305
gene-Cp1002B_RS04495	NA	-2.05102	1	-2.28721	5004.17	684.088
gene-Cp1002B_RS02905	NA	-1.30944	1	-2.30817	66.5526	8.60855
gene-Cp1002B_RS01805	NA	-0.37372	1	-2.30817	6.29893	0.737167
gene-Cp1002B_RS06735	NA	-0.37372	1	-2.30817	30.7849	3.60277
gene-Cp1002B_RS01665	NA	-0.171612	1	-2.34469	3.97199	0.398437
gene-Cp1002B_RS02515	NA	-0.342445	1	-2.38909	11.9832	1.26216
gene-Cp1002B_RS06420	NA	-1.72964	1	-2.40172	151.787	18.8086
gene-Cp1002B_RS05960	NA	-1.08321	1	-2.42442	46.3078	5.41942
gene-Cp1002B_RS00730	NA	-2.38896	1	-2.45075	69439.9	8493.03
gene-Cp1002B_RS01830	NA	-2.30276	1	-2.48665	518.785	61.808
gene-Cp1002B_RS03015	NA	-0.755657	1	-2.51462	7.66448	0.79145
gene-Cp1002B_RS06480	NA	-1.91136	1	-2.52791	138.532	15.7621
gene-Cp1002B_RS08355	NA	-1.47347	1	-2.97405	18.2715	1.40327
gene-Cp1002B_RS03455	NA	-3.0291	1	-3.88074	122.495	5.23561
