# Supplementary material for: Co-Expression Networks for Causal Gene Identification Based on RNA-seq Data of C<em>orynebacterium Pseudotuberculosis</em>
Source: Preprints.org preprint supplement (doi:10.20944/preprints202006.0144.v1), 2020-06-12
Supplement: Supplementary file 6 [file Datasheet 2-Differentially expressed genes_Gfold_CP-258.xlsx]

## Sheet: Gfold_ControlvsOsmosis
GeneSymbol	GeneName	GFOLD(0.01)	E-FDR	log2fdc	1stTPM	2ndTPM
gene-CP258_RS08600	NA	3.57902	1	4.24437	13.5776	226.744
gene-CP258_RS00515	NA	0.973389	1	3.96234	0	13.3028
gene-CP258_RS09625	NA	2.40695	1	3.42177	3.60049	35.2163
gene-CP258_RS06280	NA	1.42788	1	3.35466	0.722356	11.8655
gene-CP258_RS09620	NA	1.50222	1	3.17179	1.1595	11.4276
gene-CP258_RS03805	NA	1.37487	1	2.82741	2.99262	20.4821
gene-CP258_RS07770	NA	2.39037	1	2.80973	15.4032	92.2527
gene-CP258_RS02235	NA	1.3723	1	2.76969	1.36789	8.82715
gene-CP258_RS09615	NA	0.988372	1	2.71723	0.781653	5.56378
gene-CP258_RS00950	NA	1.78762	1	2.62055	1.4133	7.73835
gene-CP258_RS01430	NA	1.28001	1	2.59461	27.7257	154.338
gene-CP258_RS02745	NA	0.791055	1	2.5473	1.55557	9.79488
gene-CP258_RS05445	NA	1.81294	1	2.48841	8.49256	41.5592
gene-CP258_RS05395	NA	2.03817	1	2.45984	73.1009	343.202
gene-CP258_RS02210	NA	0.643133	1	2.42177	0.824737	4.74152
gene-CP258_RS06775	NA	0.722615	1	2.3953	0.802617	4.28475
gene-CP258_RS08075	NA	1.68137	1	2.36288	17.579	78.8058
gene-CP258_RS01640	NA	1.61412	1	2.24527	27.867	114.436
gene-CP258_RS04215	NA	2.14249	1	2.23685	234.923	934.019
gene-CP258_RS06835	NA	2.07118	1	2.23288	339.228	1346.42
gene-CP258_RS03930	NA	1.3278	1	2.22537	7.15308	29.7939
gene-CP258_RS06235	NA	0.505881	1	2.13226	5.34396	22.8229
gene-CP258_RS01415	NA	1.33285	1	2.1238	7.03488	26.9629
gene-CP258_RS00505	NA	1.67265	1	2.11716	68.028	251.866
gene-CP258_RS01595	NA	0.558113	1	2.10918	1.68485	6.91887
gene-CP258_RS06660	NA	0.558113	1	2.10918	2.46451	10.1205
gene-CP258_RS07620	NA	1.80963	1	2.099	111.198	403.609
gene-CP258_RS04220	NA	1.19866	1	2.07086	11.2223	41.7834
gene-CP258_RS05505	NA	0.502488	1	2.06188	1.97626	7.84501
gene-CP258_RS09100	NA	1.6293	1	2.05706	14.8707	52.7476
gene-CP258_RS06580	NA	1.4145	1	2.05545	6.72014	24.1706
gene-CP258_RS06780	NA	0.192204	1	2.0498	2.34496	10.2716
gene-CP258_RS09845	NA	0.556566	1	2.0498	2.17564	8.42378
gene-CP258_RS08185	NA	1.46163	1	2.0498	25.636	91.4388
gene-CP258_RS06830	NA	-0.303606	1	-1.97626	17.3257	3.23401
gene-CP258_RS08070	NA	-0.599089	1	-2.00113	12.5558	2.44234
gene-CP258_RS10595	NA	-1.36404	1	-2.00233	39.0341	8.01472
gene-CP258_RS01565	NA	-1.61929	1	-2.00834	94.7131	19.6758
gene-CP258_RS10160	NA	-1.35439	1	-2.01257	34.9139	7.10528
gene-CP258_RS02750	NA	-1.86309	1	-2.02455	985.803	203.968
gene-CP258_RS03105	NA	-2.00048	1	-2.02825	194073	40107.3
gene-CP258_RS10190	NA	-0.641468	1	-2.03766	9.54421	1.80893
gene-CP258_RS10585	NA	-1.52059	1	-2.08205	66.3228	12.9535
gene-CP258_RS10685	NA	-0.966474	1	-2.09655	9.57526	1.76543
gene-CP258_RS09645	NA	-0.72273	1	-2.10805	15.9643	2.87815
gene-CP258_RS02080	NA	-0.36558	1	-2.10805	5.03565	0.82716
gene-CP258_RS01120	NA	-1.82174	1	-2.11155	303.199	58.859
gene-CP258_RS03905	NA	-0.761746	1	-2.142	8.04231	1.4154
gene-CP258_RS00925	NA	-0.926219	1	-2.16319	20.5977	3.59936
gene-CP258_RS10580	NA	-1.1402	1	-2.17011	18.7998	3.30864
gene-CP258_RS06905	NA	-1.43929	1	-2.17814	27.1762	4.88248
gene-CP258_RS09305	NA	-1.33992	1	-2.17902	155.018	27.5279
gene-CP258_RS01810	NA	-0.76533	1	-2.18966	26.5255	4.46881
gene-CP258_RS08470	NA	-0.76533	1	-2.18966	24.608	4.14577
gene-CP258_RS02995	NA	-2.03505	1	-2.20481	549.96	100.398
gene-CP258_RS01735	NA	-0.0460124	1	-2.20759	3.56567	0.366062
gene-CP258_RS09480	NA	-0.0460124	1	-2.20759	9.85803	1.01205
gene-CP258_RS00460	NA	-1.19535	1	-2.21986	30.5277	5.18742
gene-CP258_RS02685	NA	-0.288298	1	-2.26005	8.95816	1.1319
gene-CP258_RS02710	NA	-0.288298	1	-2.26005	26.6988	3.37352
gene-CP258_RS10590	NA	-1.96739	1	-2.27032	127.2	22.1024
gene-CP258_RS08765	NA	-2.11783	1	-2.29168	8806.78	1513.57
gene-CP258_RS03205	NA	-1.6511	1	-2.32591	47.3026	7.7083
gene-CP258_RS06925	NA	-0.922688	1	-2.32717	10.0533	1.53615
gene-CP258_RS07920	NA	-0.976325	1	-2.33044	11.4004	1.7556
gene-CP258_RS03065	NA	-1.51553	1	-2.34252	36.0728	5.71118
gene-CP258_RS10305	NA	-1.86152	1	-2.38558	109.659	17.3665
gene-CP258_RS03910	NA	-0.718453	1	-2.49709	3.93484	0.461671
gene-CP258_RS10245	NA	-0.388239	1	-2.49709	12.9311	1.06203
gene-CP258_RS08025	NA	-0.968785	1	-2.54016	23.1978	2.88673
gene-CP258_RS03745	NA	-2.10152	1	-2.59736	80.0464	10.9571
gene-CP258_RS08760	NA	-2.32209	1	-2.6175	3481.28	475.399
gene-CP258_RS01895	NA	-0.731926	1	-2.62262	5.13143	0.495819
gene-CP258_RS10235	NA	-1.27428	1	-2.88566	8.52548	0.800229
gene-CP258_RS02370	NA	-1.52301	1	-3.10805	13.4621	1.07868
gene-CP258_RS01900	NA	-1.44142	1	-3.12512	10.538	0.786811
gene-CP258_RS09815	NA	-2.28606	1	-3.31068	70.4402	5.53375
gene-CP258_RS01620	NA	-3.04658	1	-3.43949	2809.54	215.568
gene-CP258_RS01890	NA	-1.73504	1	-3.49709	4.86463	0.249709
gene-CP258_RS08125	NA	-3.43567	1	-3.76505	5732.48	352.236
gene-CP258_RS00085	NA	-2.38661	1	-3.76946	110.338	5.91009
gene-CP258_RS10230	NA	-1.9097	1	-3.79255	17.3457	0.547928
gene-CP258_RS02365	NA	-1.04871	1	-4.03766	10.0072	0
gene-CP258_RS01575	NA	-3.68567	1	-5.46393	18.7828	0.181487

## Sheet: Gfold_ControlvsHeat
#GeneSymbol	GeneName	GFOLD(0.01)	E-FDR	log2fdc	1stTPM	2ndTPM
gene-CP258_RS09750	NA	1.66441	1	2.1943	33.6111	131.236
gene-CP258_RS08600	NA	1.41289	1	2.15079	13.5776	52.3865
gene-CP258_RS01430	NA	0.719601	1	2.09985	27.7257	108.077
gene-CP258_RS01000	NA	-0.344825	1	-2.00448	10.8516	1.97052
gene-CP258_RS06935	NA	-0.125194	1	-2.00448	13.0927	2.18727
gene-CP258_RS01890	NA	-0.548297	1	-2.04888	4.86463	0.888877
gene-CP258_RS00520	NA	-0.120105	1	-2.11996	12.4036	1.72679
gene-CP258_RS10580	NA	-1.10702	1	-2.13693	18.7998	3.36504
gene-CP258_RS10235	NA	-0.694642	1	-2.17441	8.52548	1.42427
gene-CP258_RS03755	NA	-0.0128364	1	-2.17441	4.78819	0.499948
gene-CP258_RS09560	NA	-0.0128364	1	-2.17441	4.45709	0.465377
gene-CP258_RS07660	NA	-1.85038	1	-2.53846	585.987	81.5794
gene-CP258_RS08640	NA	-0.512733	1	-2.58945	8.66284	0.657826
gene-CP258_RS04655	NA	-1.1184	1	-3.09195	9.68708	0.505728
gene-CP258_RS07845	NA	-2.80265	1	-3.42452	135.272	10.2007
gene-CP258_RS01620	NA	-3.2874	1	-3.71826	2809.54	176.011
gene-CP258_RS07000	NA	-1.01553	1	-4.00448	23.1048	0
gene-CP258_RS00085	NA	-3.29593	1	-4.95868	110.338	2.00361

## Sheet: Gfold_ControlvsAcid
GeneSymbol	GeneName	GFOLD(0.01)	E-FDR	log2fdc	1stTPM	2ndTPM
gene-CP258_RS00085	NA	-4.09237	1	-5.86705	110.338	0.70709
gene-CP258_RS01620	NA	-3.84728	1	-4.31468	2809.54	102.436
gene-CP258_RS09815	NA	-2.53702	1	-3.48543	70.4402	4.33351
gene-CP258_RS04800	NA	-1.50303	1	-2.97997	14.1188	1.16149
gene-CP258_RS00060	NA	-2.48615	1	-2.83632	2317.92	238.188
gene-CP258_RS00990	NA	-0.887676	1	-2.59093	10.566	1.08338
gene-CP258_RS02465	NA	-0.57853	1	-2.55028	5.29821	0.480564
gene-CP258_RS05110	NA	-0.336244	1	-2.49782	2.99262	0.220545
gene-CP258_RS03065	NA	-1.62036	1	-2.39828	36.0728	4.86845
gene-CP258_RS01920	NA	-2.11838	1	-2.3005	377.818	56.6524
gene-CP258_RS07255	NA	-0.996458	1	-2.26078	36.3933	5.23326
gene-CP258_RS08285	NA	-1.82577	1	-2.2593	126.642	19.3678
gene-CP258_RS09610	NA	-1.64839	1	-2.24543	17.7565	2.71411
gene-CP258_RS01900	NA	-0.782733	1	-2.24543	10.538	1.50616
gene-CP258_RS06720	NA	-1.61448	1	-2.22098	95.1526	14.7858
gene-CP258_RS05175	NA	-1.69705	1	-2.21866	128.745	20.1553
gene-CP258_RS00830	NA	-2.15188	1	-2.21362	48440	7726.69
gene-CP258_RS10245	NA	-0.130871	1	-2.20236	12.9311	1.52475
gene-CP258_RS01895	NA	-0.381246	1	-2.17589	5.13143	0.711844
gene-CP258_RS01575	NA	-1.43991	1	-2.16919	18.7828	2.99643
gene-CP258_RS08760	NA	-1.89988	1	-2.14039	3481.28	582.586
gene-CP258_RS10585	NA	-1.60883	1	-2.13963	66.3228	10.9676
gene-CP258_RS02685	NA	-0.203303	1	-2.13525	8.95816	1.2188
gene-CP258_RS01120	NA	-1.8425	1	-2.11144	303.199	51.7313
gene-CP258_RS06785	NA	-1.43688	1	-2.08794	106.795	18.1625
gene-CP258_RS03855	NA	-1.25615	1	-2.07996	66.6537	11.2277
gene-CP258_RS02905	NA	-0.972237	1	-2.05372	26.1854	4.41089
gene-CP258_RS07705	NA	-1.17063	1	-2.04778	22.2424	3.81483
gene-CP258_RS00250	NA	1.0735	1	2.0145	7.69288	24.4219
gene-CP258_RS01760	NA	0.272988	1	2.06443	1.42829	5.61386
gene-CP258_RS08140	NA	1.39324	1	2.08715	9.30137	30.2802
gene-CP258_RS01595	NA	0.607757	1	2.11268	1.68485	6.12558
gene-CP258_RS02745	NA	0.352901	1	2.13154	1.55557	6.41981
gene-CP258_RS08445	NA	1.59545	1	2.1521	14.1957	47.7281
gene-CP258_RS00285	NA	0.493594	1	2.15753	0.908821	3.61674
gene-CP258_RS03805	NA	0.732379	1	2.22231	2.99262	11.7624
gene-CP258_RS03390	NA	0.366374	1	2.25707	0.914774	4.58425
gene-CP258_RS00985	NA	2.15396	1	2.3872	45.9393	178.516
gene-CP258_RS01430	NA	1.08904	1	2.39457	27.7257	118.056
gene-CP258_RS02810	NA	1.74316	1	2.39793	27.8568	112.337
gene-CP258_RS00440	NA	1.62751	1	2.45347	11.303	48.4246
gene-CP258_RS09690	NA	0.453001	1	2.47946	0.551271	4.22517
gene-CP258_RS10455	NA	0.453001	1	2.47946	1.71707	13.1604
gene-CP258_RS08335	NA	1.69504	1	2.5176	4.71809	21.1405
gene-CP258_RS10200	NA	1.75249	1	2.52455	2.71848	12.1619
gene-CP258_RS09760	NA	2.27114	1	2.53409	84.2804	363.047
gene-CP258_RS00950	NA	1.75957	1	2.579	1.4133	6.61039
gene-CP258_RS06325	NA	2.3312	1	2.60255	53.7051	242.683
gene-CP258_RS05575	NA	2.43024	1	2.63864	30.8653	142.688
gene-CP258_RS00255	NA	1.67804	1	2.7165	10.6681	56.0347
gene-CP258_RS10705	NA	1.29009	1	2.78759	1.25589	7.55246
gene-CP258_RS06280	NA	0.972352	1	2.92004	0.722356	7.66583
gene-CP258_RS09765	NA	2.84183	1	2.93523	238.454	1350.57
gene-CP258_RS10505	NA	2.97451	1	3.12966	312.309	2026.54
gene-CP258_RS00865	NA	0.180356	1	3.25707	0	1.52304
gene-CP258_RS03835	NA	2.65625	1	3.28455	12.067	90.2099
gene-CP258_RS06185	NA	2.64945	1	3.31345	16.8198	128.914
gene-CP258_RS10385	NA	2.06951	1	3.44972	5.0276	46.9319
gene-CP258_RS00515	NA	0.453001	1	3.47946	0	8.27611
gene-CP258_RS09920	NA	2.12173	1	3.95751	1.68938	37.8483
gene-CP258_RS04575	NA	3.38513	1	4.0781	8.15611	107.055
gene-CP258_RS09640	NA	4.98832	1	5.23719	21.0715	591.516
