# Supplementary material for: Co-Expression Networks for Causal Gene Identification Based on RNA-seq Data of C<em>orynebacterium Pseudotuberculosis</em>
Source: Preprints.org preprint supplement (doi:10.20944/preprints202006.0144.v1), 2020-06-12
Supplement: Supplementary file 7 [file Datasheet 3-Differentially expressed genes_edgeR _CP-T1.xlsx]

## Sheet: CP-T1
Name	High_iron	Low_iron	FDR	AveExpr	P value	S1_A_Ct_T1	S1_B_Ct_T1	S2_Ct_T1	S1_A_LI_T1	S2_B_LI_T1	S1_B_LI_T1	S1_A_Ct_T1 CPM	S1_B_Ct_T1 CPM	S2_Ct_T1 CPM	S1_A_LI_T1 CPM	S2_B_LI_T1 CPM	S1_B_LI_T1 CPM
CpCpT1_RS02285	0	6.18331	2.59e-162	7.65999	1.22e-165	8	28	25	511	194	1048	4.483	8.126	5.064	480.267	271.727	478.408
CpCpT1_RS07315	0	5.85745	4.48e-146	6.21039	4.23e-149	8	11	10	205	58	447	4.483	3.192	2.026	192.671	81.238	204.054
CpCpT1_RS10530	0	5.73675	3.9e-144	6.22493	5.52e-147	8	6	18	201	61	453	4.483	1.741	3.646	188.911	85.44	206.793
CpCpT1_RS02265	0	4.36661	1.77e-125	5.98411	3.34e-128	13	30	26	167	58	348	7.285	8.706	5.267	156.956	81.238	158.861
CpCpT1_RS09900	0	8.89189	2.07e-123	8.67334	4.87e-126	3	8	7	1105	321	2216	1.681	2.322	1.418	1038.54	449.609	1011.6
CpCpT1_RS07320	0	5.83507	4.21e-104	8.24846	1.19e-106	18	47	50	810	238	1644	10.087	13.64	10.128	761.284	333.355	750.48
CpCpT1_RS02270	0	3.35504	7.39e-92	6.13888	2.44e-94	28	54	64	187	56	354	15.69	15.671	12.964	175.753	78.437	161.6
CpCpT1_RS03560	0	3.01939	2.23e-84	6.26561	8.4e-87	42	76	74	180	69	372	23.536	22.056	14.99	169.174	96.645	169.817
CpCpT1_RS01230	0	-4.19862	3.52e-82	6.34003	1.49e-84	282	505	666	7	4	20	158.025	146.556	134.906	6.579	5.603	9.13
CpCpT1_RS09905	0	8.58505	1.81e-80	9.63914	8.55e-83	14	9	19	1968	729	4059	7.845	2.612	3.849	1849.64	1021.08	1852.92
CpCpT1_RS04110	0	-4.26059	4.8e-76	6.5522	2.49e-78	306	591	833	8	4	23	171.473	171.513	168.733	7.519	5.603	10.499
CpCpT1_RS05380	0	-3.62164	1.1e-68	6.41818	6.21e-71	322	510	642	17	7	23	180.439	148.007	130.044	15.978	9.805	10.499
CpCpT1_RS00620	0	-3.37727	6.53e-64	6.22288	4e-66	240	470	590	13	5	31	134.489	136.398	119.511	12.218	7.003	14.151
CpCpT1_RS01235	0	-4.19356	8.93e-61	5.62334	5.89e-63	169	321	351	6	2	10	94.703	93.157	71.099	5.639	2.801	4.565
CpCpT1_RS10005	0	2.58544	5.34e-59	6.11431	3.78e-61	36	79	115	157	60	322	20.173	22.927	23.295	147.558	84.039	146.992
CpCpT1_RS02895	0	2.67033	1.16e-57	6.27707	8.78e-60	48	103	87	194	63	341	26.898	29.892	17.623	182.332	88.241	155.665
CpCpT1_RS10740	0	3.82178	7.32e-54	5.04705	5.87e-56	7	19	28	77	28	211	3.923	5.514	5.672	72.369	39.218	96.321
CpCpT1_RS10255	0	-4.57693	5.36e-53	9.10444	4.54e-55	2299	4260	4040	49	23	103	1288.29	1236.29	818.346	46.053	32.215	47.019
CpCpT1_RS00570	0	-3.47179	6.31e-53	5.81125	5.65e-55	181	377	395	4	5	25	101.427	109.409	80.012	3.759	7.003	11.412
CpCpT1_RS08935	0	-2.90621	1.86e-35	5.60863	1.76e-37	163	258	368	17	4	20	91.34	74.874	74.542	15.978	5.603	9.13
CpCpT1_RS01225	0	-6.19856	7.42e-34	4.65052	7.34e-36	64	166	194	2	0	0	35.864	48.175	39.297	1.88	0	0
CpCpT1_RS01595	0	-3.31374	2.99e-33	5.1135	3.24e-35	111	190	259	9	1	12	62.201	55.14	52.463	8.459	1.401	5.478
CpCpT1_RS07075	0	-2.07779	3.14e-33	7.50041	3.55e-35	591	1026	1335	75	28	179	331.179	297.754	270.419	70.489	39.218	81.713
CpCpT1_RS04425	0	3.01106	2.92e-32	4.40734	3.44e-34	10	20	28	56	15	119	5.604	5.804	5.672	52.632	21.01	54.323
CpCpT1_RS01620	0	-2.97094	4.12e-32	5.62188	5.04e-34	155	339	307	20	1	19	86.857	98.381	62.186	18.797	1.401	8.673
CpCpT1_RS01455	0	2.20544	8.12e-32	5.15566	1.03e-33	25	57	68	78	27	171	14.009	16.542	13.774	73.309	37.818	78.061
CpCpT1_RS02295	0	-2.37505	1.32e-30	5.55223	1.74e-32	140	274	322	14	6	36	78.452	79.517	65.225	13.158	8.404	16.434
CpCpT1_RS01610	0	-3.98194	1.42e-30	4.79004	1.95e-32	85	185	177	5	0	6	47.632	53.689	35.853	4.699	0	2.739
CpCpT1_RS01600	0	-2.67311	4.76e-30	5.41498	6.95e-32	128	263	293	5	4	34	71.727	76.325	59.35	4.699	5.603	15.521
CpCpT1_RS10635	0	3.08386	7.83e-30	7.07764	1.18e-31	56	142	115	364	67	734	31.381	41.21	23.295	342.108	93.844	335.068
CpCpT1_RS04105	0	-3.3216	3.34e-28	4.87452	5.36e-30	82	177	210	3	5	10	45.95	51.367	42.538	2.82	7.003	4.565
CpCpT1_RS07080	0	-2.09976	1.99e-27	7.80557	3.29e-29	679	1352	1673	97	46	179	380.492	392.363	338.885	91.166	64.43	81.713
CpCpT1_RS02275	0	2.63349	4.25e-27	4.54455	7.21e-29	15	36	27	53	23	117	8.406	10.448	5.469	49.812	32.215	53.41
CpCpT1_RS03715	0	3.84247	1.96e-25	3.67614	3.51e-27	6	3	12	39	10	76	3.362	0.871	2.431	36.654	14.007	34.694
CpCpT1_RS00890	0	-2.64291	5.98e-25	5.25747	1.1e-26	100	231	287	10	1	28	56.037	67.038	58.135	9.399	1.401	12.782
CpCpT1_RS02280	0	3.12756	6.4e-25	3.85282	1.21e-26	8	12	17	35	13	84	4.483	3.483	3.444	32.895	18.208	38.346
CpCpT1_RS01605	0	-3.23662	1.31e-24	4.75621	2.52e-26	98	145	176	4	0	14	54.916	42.08	35.651	3.759	0	6.391
CpCpT1_RS02380	0	-2.69367	1.32e-24	4.98168	2.62e-26	103	171	206	7	7	15	57.718	49.626	41.728	6.579	9.805	6.847
CpCpT1_RS10010	0	2.2668	5.97e-24	4.61999	1.21e-25	21	37	42	49	24	119	11.768	10.738	8.508	46.053	33.616	54.323
CpCpT1_RS00195	0	-2.32999	4.12e-23	6.11353	8.55e-25	227	474	378	15	15	56	127.204	137.559	76.568	14.098	21.01	25.564
CpCpT1_RS04115	0	-3.39324	2.8e-21	4.88356	6.07e-23	120	143	189	9	2	6	67.244	41.5	38.284	8.459	2.801	2.739
CpCpT1_RS01180	0	2.48175	3.06e-21	4.63092	6.79e-23	20	21	49	55	20	129	11.207	6.094	9.925	51.692	28.013	58.888
CpCpT1_RS08335	0	-4.25138	1.15e-20	4.42256	2.6e-22	68	94	182	1	0	6	38.105	27.28	36.866	0.94	0	2.739
CpCpT1_RS08505	0	3.11788	9.69e-17	7.43484	2.33e-18	79	167	166	267	275	542	44.269	48.465	33.625	250.942	385.179	247.421
CpCpT1_RS02375	0	-3.00186	2.25e-16	4.68991	5.51e-18	83	181	129	5	1	14	46.511	52.528	26.13	4.699	1.401	6.391
CpCpT1_RS02255	0	3.45093	2.42e-16	2.9803	6.05e-18	2	6	9	25	9	39	1.121	1.741	1.823	23.496	12.606	17.803
CpCpT1_RS03080	0	3.10814	1.25e-14	3.28749	3.47e-16	3	8	15	18	13	58	1.681	2.322	3.038	16.917	18.208	26.477
CpCpT1_RS03075	0	3.35042	1.27e-13	3.27511	3.89e-15	5	3	15	24	16	47	2.802	0.871	3.038	22.557	22.41	21.455
CpCpT1_RS02400	0	-2.00172	7.12e-13	4.66984	2.25e-14	69	128	168	11	7	17	38.666	37.147	34.03	10.338	9.805	7.76
CpCpT1_RS04950	0	2.17303	2.97e-12	4.43648	9.66e-14	25	24	40	37	14	126	14.009	6.965	8.102	34.775	19.609	57.519
CpCpT1_RS07365	0	2.25012	7.87e-12	3.72794	2.67e-13	6	25	25	28	9	71	3.362	7.255	5.064	26.316	12.606	32.411
CpCpT1_RS02260	0	5.12874	6.1e-11	1.79067	2.16e-12	0	0	2	13	4	16	0	0	0.405	12.218	5.603	7.304
CpCpT1_RS08080	0	3.56276	1.15e-10	2.77649	4.17e-12	2	1	10	14	5	48	1.121	0.29	2.026	13.158	7.003	21.912
CpCpT1_RS08930	0	-2.05295	1.28e-10	4.28755	4.71e-12	51	95	132	10	2	14	28.579	27.57	26.738	9.399	2.801	6.391
CpCpT1_RS01615	0	-2.64662	1.29e-10	3.84699	4.85e-12	45	64	96	4	0	9	25.217	18.573	19.446	3.759	0	4.108
CpCpT1_RS03070	0	2.79706	1.98e-10	3.64898	7.76e-12	8	20	14	37	21	41	4.483	5.804	2.836	34.775	29.414	18.716
CpCpT1_RS08685	0	2.87255	3.69e-10	3.42337	1.49e-11	7	14	10	13	13	71	3.923	4.063	2.026	12.218	18.208	32.411
CpCpT1_RS03720	0	2.92119	5.37e-10	2.97625	2.2e-11	4	13	5	24	4	42	2.241	3.773	1.013	22.557	5.603	19.173
CpCpT1_RS10090	0	-2.14188	2.79e-09	4.18734	1.24e-10	46	114	98	5	3	15	25.777	33.084	19.851	4.699	4.202	6.847
CpCpT1_RS10405	0	2.3831	1.09e-07	3.15585	5.38e-09	7	7	22	24	11	34	3.923	2.031	4.456	22.557	15.407	15.521
CpCpT1_RS02790	0	3.00805	1.53e-07	2.37894	7.92e-09	0	10	4	11	6	28	0	2.902	0.81	10.338	8.404	12.782
CpCpT1_RS02910	0	2.20213	1.74e-07	3.013	9.08e-09	6	14	15	18	12	30	3.362	4.063	3.038	16.917	16.808	13.695
CpCpT1_RS05385	0	-2.3679	2.3e-07	3.88064	1.22e-08	52	77	73	0	1	16	29.139	22.346	14.787	0	1.401	7.304
CpCpT1_RS08075	0	3.73612	2.97151e-06	1.54592	1.9e-07	1	0	3	7	1	17	0.56	0	0.608	6.579	1.401	7.76
CpCpT1_RS06440	0	-2.32995	1.42071e-05	3.42068	9.51e-07	40	52	47	6	1	4	22.415	15.091	9.52	5.639	1.401	1.826
CpCpT1_RS10380	0	2.12459	2.01459e-05	2.65389	1.40509e-06	7	7	12	9	4	36	3.923	2.031	2.431	8.459	5.603	16.434
CpCpT1_RS00225	0	-2.68611	3.74419e-05	2.90029	2.71727e-06	26	40	29	2	0	4	14.57	11.608	5.874	1.88	0	1.826
CpCpT1_RS05195	0	-3.271	4.59889e-05	2.59756	3.42425e-06	10	41	28	1	0	2	5.604	11.899	5.672	0.94	0	0.913
CpCpT1_RS07475	0	-3.59453	9.19059e-05	2.43155	7.31997e-06	13	36	19	2	0	0	7.285	10.448	3.849	1.88	0	0
CpCpT1_RS00300	0	-5.92175	0.000215638	1.55013	1.80884e-05	6	14	12	0	0	0	3.362	4.063	2.431	0	0	0
CpCpT1_RS01035	0	-2.86832	0.000259784	2.27393	2.25261e-05	11	18	30	1	0	2	6.164	5.224	6.077	0.94	0	0.913
CpCpT1_RS10410	0	2.40786	0.000264368	1.82495	2.3052e-05	1	4	7	10	1	15	0.56	1.161	1.418	9.399	1.401	6.847
CpCpT1_RS01405	0	-2.42032	0.000275376	2.4968	2.43971e-05	11	27	32	1	0	4	6.164	7.836	6.482	0.94	0	1.826
CpCpT1_RS08315	0	3.87967	0.000302516	1.06949	2.70867e-05	0	1	1	4	0	12	0	0.29	0.203	3.759	0	5.478
CpCpT1_RS07765	0	-5.63832	0.00196193	1.34762	0.000231142	5	13	8	0	0	0	2.802	3.773	1.62	0	0	0
CpCpT1_RS00215	0	-5.53989	0.00238051	1.30009	0.000289431	3	12	10	0	0	0	1.681	3.483	2.026	0	0	0
CpCpT1_RS10415	0	-2.2237	0.00314015	2.5571	0.000403988	23	26	20	2	1	3	12.889	7.545	4.051	1.88	1.401	1.369
CpCpT1_RS01990	0	2.4906	0.00327439	1.32851	0.000422801	0	4	3	4	1	12	0	1.161	0.608	3.759	1.401	5.478
CpCpT1_RS07360	0	2.23945	0.00510541	1.55952	0.000719377	2	1	7	6	1	13	1.121	0.29	1.418	5.639	1.401	5.934
CpCpT1_RS07865	0	2.47596	0.0108967	1.153	0.00175621	0	1	5	4	1	9	0	0.29	1.013	3.759	1.401	4.108
CpCpT1_RS07530	0	-5.01085	0.0125324	0.960361	0.00206117	3	5	9	0	0	0	1.681	1.451	1.823	0	0	0
CpCpT1_RS09590	0	-2.32069	0.0128315	1.83035	0.00212246	11	12	15	0	0	3	6.164	3.483	3.038	0	0	1.369
CpCpT1_RS07325	0	2.10535	0.014358	1.28791	0.00245616	2	2	4	5	0	10	1.121	0.58	0.81	4.699	0	4.565
CpCpT1_RS08085	0	2.00066	0.0148568	1.55718	0.00258349	3	1	7	5	1	13	1.681	0.29	1.418	4.699	1.401	5.934
CpCpT1_RS01805	0	-2.23744	0.0150423	1.87343	0.00262769	6	16	18	1	2	0	3.362	4.643	3.646	0.94	2.801	0
CpCpT1_RS03205	0	-4.91	0.0167725	0.908442	0.00303399	2	6	8	0	0	0	1.121	1.741	1.62	0	0	0
CpCpT1_RS08670	0	-2.271	0.0167725	1.81089	0.00303517	11	14	12	1	0	2	6.164	4.063	2.431	0.94	0	0.913
CpCpT1_RS10385	0	2.42491	0.0228958	0.973956	0.00447774	2	0	3	4	2	5	1.121	0	0.608	3.759	2.801	2.282
CpCpT1_RS08375	0	3.35276	0.0279928	0.394579	0.00567243	0	1	0	3	0	3	0	0.29	0	2.82	0	1.369
CpCpT1_RS10645	0	2.57027	0.0286261	0.669424	0.00582776	0	1	2	2	1	5	0	0.29	0.405	1.88	1.401	2.282
CpCpT1_RS01080	0	-2.0874	0.0323734	1.72736	0.00686524	4	14	17	0	1	2	2.241	4.063	3.444	0	1.401	0.913
CpCpT1_RS07275	0	4.09835	0.0433116	0.0486214	0.00996045	0	0	0	1	1	1	0	0	0	0.94	1.401	0.456
CpCpT1_RS00295	0	-2.62615	0.0456105	1.65538	0.0105966	10	3	20	1	0	1	5.604	0.871	4.051	0.94	0	0.456
