# Supplementary material for: Co-Expression Networks for Causal Gene Identification Based on RNA-seq Data of C<em>orynebacterium Pseudotuberculosis</em>
Source: Preprints.org preprint supplement (doi:10.20944/preprints202006.0144.v1), 2020-06-12
Supplement: Supplementary file 8 [file Datasheet 4-Differentially expressed genes_edgeR _CP-13.xlsx]

## Sheet: DE_Results_data_CP13_2_coditions_tpm_filter
Name	Low_iron	High_iron	FDR	AveExpr	P value	S1_Ct_Cp13	S2_A_Ct_Cp13	S2_B_Ct_Cp13	S3_Ct_Cp13	S4_A_Ct_Cp13	S4_B_Ct_Cp13	S1_LI_Cp13	S2_LI_Cp13	S3_LI_Cp13	S4_A_LI_Cp13	S4_B_LI_Cp13	S1_Ct_Cp13 CPM	S2_A_Ct_Cp13 CPM	S2_B_Ct_Cp13 CPM	S3_Ct_Cp13 CPM	S4_A_Ct_Cp13 CPM	S4_B_Ct_Cp13 CPM	S1_LI_Cp13 CPM	S2_LI_Cp13 CPM	S3_LI_Cp13 CPM	S4_A_LI_Cp13 CPM	S4_B_LI_Cp13 CPM
CpCp13_RS07315	0	-4.98983	8.84e-32	6.77489	4.17e-35	48	2	13	33	5	12	1475	294	67	67	451	11.383	1.737	5.588	9.107	6.328	8.105	592.745	212.181	207.621	159.645	192.694
CpCp13_RS04110	0	5.08555	2.34e-29	5.85352	2.2e-32	614	97	185	425	59	115	11	4	1	3	4	145.605	84.264	79.523	117.289	74.671	77.675	4.42	2.887	3.099	7.148	1.709
CpCp13_RS09900	0	-6.681	3.28e-27	9.57193	4.64e-30	133	17	20	67	10	16	9994	1828	432	623	3478	31.54	14.768	8.597	18.49	12.656	10.807	4016.2	1319.28	1338.69	1484.46	1486.01
CpCp13_RS09905	0	-7.26449	2.88e-25	10.555	5.42e-28	121	10	32	109	17	35	11698	3453	1113	1446	8273	28.694	8.687	13.755	30.081	21.515	23.64	4700.97	2492.05	3448.99	3445.47	3534.72
CpCp13_RS02790	0	-5.25279	8.78e-25	4.52994	2.07e-27	12	1	0	7	1	0	267	53	26	17	64	2.846	0.869	0	1.932	1.266	0	107.297	38.25	80.569	40.507	27.345
CpCp13_RS02285	0	-4.3603	2.78e-24	7.01195	7.86e-27	29	14	32	58	11	16	1132	453	79	92	535	6.877	12.162	13.755	16.006	13.922	10.807	454.906	326.932	244.807	219.214	228.584
CpCp13_RS04115	0	4.87585	2.53e-20	4.58885	8.33e-23	199	49	87	183	22	31	6	2	1	0	2	47.191	42.566	37.397	50.503	27.843	20.938	2.411	1.443	3.099	0	0.855
CpCp13_RS07320	0	-4.27384	2.13e-18	8.5591	8.02e-21	130	32	91	141	41	56	2948	1203	194	335	1828	30.828	27.798	39.117	38.912	51.89	37.824	1184.69	868.211	601.172	798.223	781.03
CpCp13_RS04105	0	4.16619	1.58e-17	4.2254	6.69e-20	244	21	44	120	20	38	8	2	0	1	3	57.863	18.243	18.914	33.117	25.312	25.666	3.215	1.443	0	2.383	1.282
CpCp13_RS04425	0	-3.05684	7.56e-15	5.07642	3.56e-17	55	9	9	32	3	12	146	89	25	25	185	13.043	7.818	3.869	8.831	3.797	8.105	58.672	64.232	77.471	59.569	79.043
CpCp13_RS07075	0	2.91803	1.14e-13	6.78356	5.9e-16	766	154	318	876	134	243	106	37	5	12	40	181.651	133.78	136.694	241.753	169.591	164.13	42.597	26.703	15.494	28.593	17.09
CpCp13_RS10740	0	-3.13704	2.44e-13	4.92486	1.38e-15	56	8	12	22	4	4	112	105	19	24	154	13.28	6.95	5.158	6.071	5.062	2.702	45.008	75.779	58.878	57.186	65.798
CpCp13_RS10255	0	3.91329	2.28e-12	7.73372	1.4e-14	812	416	749	1684	251	534	211	21	4	7	43	192.559	361.38	321.962	464.739	317.666	360.681	84.793	15.156	12.395	16.679	18.372
CpCp13_RS02275	0	-2.7674	7.55e-12	4.92476	4.98e-14	26	6	18	35	13	7	183	61	18	28	149	6.166	5.212	7.737	9.659	16.453	4.728	73.541	44.024	55.779	66.717	63.662
CpCp13_RS02265	0	-3.0047	3.11e-11	6.0188	2.2e-13	29	17	21	85	19	17	302	243	35	49	281	6.877	14.768	9.027	23.458	24.046	11.482	121.362	175.374	108.459	116.755	120.06
CpCp13_RS02270	0	-2.81514	6.74e-11	6.42873	5.08e-13	45	29	31	105	22	36	454	207	44	86	420	10.671	25.192	13.326	28.977	27.843	24.316	182.445	149.393	136.348	204.917	179.449
CpCp13_RS01230	0	3.48894	1.07e-10	6.01647	8.6e-13	1364	73	138	429	55	83	38	10	0	2	41	323.462	63.415	59.32	118.393	69.608	56.061	15.271	7.217	0	4.766	17.518
CpCp13_RS07090	0	2.68466	1.13e-10	6.30902	9.54e-13	465	110	197	502	114	207	109	13	6	8	47	110.271	95.557	84.682	138.539	144.279	139.815	43.803	9.382	18.593	19.062	20.081
CpCp13_RS07080	0	2.7304	1.13e-10	6.92834	1.01e-12	563	173	350	1080	138	294	109	37	8	13	75	133.511	150.285	150.449	298.051	174.653	198.577	43.803	26.703	24.791	30.976	32.044
CpCp13_RS03715	0	-2.57857	1.74e-10	3.95747	1.64e-12	20	7	5	18	4	8	135	43	5	9	63	4.743	6.081	2.149	4.968	5.062	5.403	54.251	31.033	15.494	21.445	26.917
CpCp13_RS00070	0	-2.66756	5.16e-10	4.32912	5.1e-12	34	3	6	30	10	3	107	45	11	20	95	8.063	2.606	2.579	8.279	12.656	2.026	42.999	32.477	34.087	47.655	40.59
CpCp13_RS01235	0	3.23841	5.66e-10	5.37907	6.14e-12	849	38	67	249	45	59	31	11	4	0	14	201.334	33.011	28.8	68.717	56.952	39.851	12.458	7.939	12.395	0	5.982
CpCp13_RS10635	0	-2.59537	5.66e-10	6.83041	6.07e-12	332	29	72	125	17	26	940	404	32	80	459	78.731	25.192	30.95	34.497	21.515	17.561	377.749	291.569	99.162	190.621	196.112
CpCp13_RS07085	0	2.82163	5.66e-10	6.50548	6.4e-12	310	145	282	708	118	208	73	19	8	13	41	73.514	125.962	121.219	195.389	149.341	140.49	29.336	13.712	24.791	30.976	17.518
CpCp13_RS10530	0	-3.84021	1.48e-09	6.82757	1.74e-11	318	6	19	29	2	14	759	272	94	81	586	75.411	5.212	8.167	8.003	2.531	9.456	305.012	196.304	291.29	193.003	250.374
CpCp13_RS03560	0	-2.37204	4.07e-08	6.71139	4.98e-10	393	38	45	129	24	20	878	235	75	65	325	93.197	33.011	19.343	35.601	30.374	13.509	352.834	169.601	232.412	154.879	138.859
CpCp13_RS00620	0	2.69325	7.42e-08	4.8676	9.44e-10	85	39	80	286	38	55	34	7	3	3	12	20.157	33.879	34.388	78.928	48.093	37.149	13.663	5.052	9.296	7.148	5.127
CpCp13_RS00570	0	2.70159	2.15e-07	4.2281	2.84e-09	62	32	55	159	17	39	23	3	0	2	12	14.703	27.798	23.642	43.88	21.515	26.342	9.243	2.165	0	4.766	5.127
CpCp13_RS03720	0	-2.74572	3.91e-07	3.12164	5.34e-09	7	2	0	13	5	3	60	24	4	6	33	1.66	1.737	0	3.588	6.328	2.026	24.112	17.321	12.395	14.297	14.1
CpCp13_RS01180	0	-2.76435	1.39385e-06	3.75245	1.97e-08	19	5	3	20	2	5	24	34	9	13	80	4.506	4.344	1.29	5.519	2.531	3.377	9.645	24.538	27.889	30.976	34.181
CpCp13_RS08505	0	-3.67998	2.71451e-06	7.26659	3.97e-08	6	15	53	144	19	48	133	558	108	149	826	1.423	13.031	22.782	39.74	24.046	32.421	53.447	402.711	334.673	355.031	352.916
CpCp13_RS09950	0	2.22399	2.79392e-06	4.79498	4.21e-08	235	45	65	232	12	50	19	14	2	6	21	55.728	39.092	27.941	64.026	15.187	33.772	7.635	10.104	6.198	14.297	8.972
CpCp13_RS08860	0	2.61173	4.3222e-06	3.1141	6.72e-08	63	12	29	41	10	12	15	1	0	0	3	14.94	10.424	12.466	11.315	12.656	8.105	6.028	0.722	0	0	1.282
CpCp13_RS01620	0	2.68341	5.42009e-06	4.74178	8.68e-08	51	41	117	184	37	39	34	7	1	5	8	12.094	35.617	50.293	50.779	46.827	26.342	13.663	5.052	3.099	11.914	3.418
CpCp13_RS08080	0	-2.64794	5.48512e-06	3.16358	9.05e-08	27	2	5	4	2	1	54	27	2	12	27	6.403	1.737	2.149	1.104	2.531	0.675	21.7	19.486	6.198	28.593	11.536
CpCp13_RS01225	0	3.09886	6.46435e-06	4.33546	1.13e-07	435	16	21	125	13	34	15	1	1	0	16	103.157	13.899	9.027	34.497	16.453	22.965	6.028	0.722	3.099	0	6.836
CpCp13_RS01685	0	2.74633	9.5504e-06	3.00987	1.76e-07	76	13	22	37	6	12	14	0	0	1	1	18.023	11.293	9.457	10.211	7.594	8.105	5.626	0	0	2.383	0.427
CpCp13_RS08335	0	3.96504	1.00178e-05	3.64927	1.89e-07	315	8	12	53	10	14	4	5	0	0	0	74.7	6.95	5.158	14.627	12.656	9.456	1.607	3.609	0	0	0
CpCp13_RS08760	0	-2.11599	1.26343e-05	5.09788	2.44e-07	28	13	36	76	11	12	101	101	23	25	135	6.64	11.293	15.475	20.974	13.922	8.105	40.588	72.892	71.273	59.569	57.68
CpCp13_RS10405	0	-2.27017	2.59363e-05	2.77155	5.13e-07	11	1	4	12	2	3	29	15	6	4	28	2.609	0.869	1.719	3.312	2.531	2.026	11.654	10.826	18.593	9.531	11.963
CpCp13_RS06510	0	2.11015	9.67059e-05	3.52703	2.14193e-06	70	18	36	64	8	17	14	6	4	0	4	16.6	15.637	15.475	17.662	10.125	11.482	5.626	4.33	12.395	0	1.709
CpCp13_RS01595	0	2.00894	0.000344496	4.18962	7.9549e-06	96	15	79	133	10	36	49	6	1	2	8	22.766	13.031	33.959	36.704	12.656	24.316	19.691	4.33	3.099	4.766	3.418
CpCp13_RS02610	0	-2.81572	0.000384036	4.18812	9.04893e-06	81	2	11	3	0	2	256	55	2	12	47	19.209	1.737	4.728	0.828	0	1.351	102.876	39.694	6.198	28.593	20.081
CpCp13_RS09955	0	-3.12991	0.000399042	2.55336	9.59055e-06	18	2	0	1	0	0	82	10	3	4	8	4.269	1.737	0	0.276	0	0	32.953	7.217	9.296	9.531	3.418
CpCp13_RS02255	0	-2.33899	0.000721534	2.92095	1.80213e-05	3	0	2	17	3	7	47	23	4	5	21	0.711	0	0.86	4.692	3.797	4.728	18.887	16.599	12.395	11.914	8.972
CpCp13_RS00295	0	5.14361	0.000731377	1.13051	1.86118e-05	16	2	3	10	1	1	0	0	0	0	0	3.794	1.737	1.29	2.76	1.266	0.675	0	0	0	0	0
CpCp13_RS07070	0	-2.3193	0.000770348	5.92	2.03296e-05	21	28	43	133	16	23	46	159	35	64	307	4.98	24.324	18.484	36.704	20.25	15.535	18.486	114.751	108.459	152.496	131.169
CpCp13_RS03775	0	2.2466	0.00143038	2.63101	3.97703e-05	33	9	8	29	7	16	11	1	1	0	2	7.826	7.818	3.439	8.003	8.859	10.807	4.42	0.722	3.099	0	0.855
CpCp13_RS00450	0	3.2141	0.00185971	1.75057	5.25837e-05	21	2	3	12	4	10	2	0	1	0	0	4.98	1.737	1.29	3.312	5.062	6.754	0.804	0	3.099	0	0
CpCp13_RS02380	0	2.27656	0.00196163	3.09599	5.73144e-05	27	5	33	56	11	15	12	0	0	2	7	6.403	4.344	14.185	15.455	13.922	10.132	4.822	0	0	4.766	2.991
CpCp13_RS02615	0	-2.53893	0.00291533	4.01373	9.06748e-05	95	1	1	6	1	6	257	36	4	8	33	22.528	0.869	0.43	1.656	1.266	4.053	103.278	25.981	12.395	19.062	14.1
CpCp13_RS01605	0	2.18287	0.00649703	3.91937	0.000220446	33	28	60	86	18	20	56	2	0	0	6	7.826	24.324	25.791	23.734	22.781	13.509	22.504	1.443	0	0	2.564
CpCp13_RS01615	0	2.09416	0.00914355	2.56351	0.000332588	21	6	21	44	4	7	12	0	0	0	5	4.98	5.212	9.027	12.143	5.062	4.728	4.822	0	0	0	2.136
CpCp13_RS03080	0	-2.098	0.00914355	2.76036	0.000336097	5	5	8	12	0	2	49	10	1	12	13	1.186	4.344	3.439	3.312	0	1.351	19.691	7.217	3.099	28.593	5.554
CpCp13_RS03995	0	-2.2073	0.0116394	2.35941	0.000449778	10	2	3	8	2	1	6	9	3	9	19	2.371	1.737	1.29	2.208	2.531	0.675	2.411	6.495	9.296	21.445	8.118
CpCp13_RS02260	0	-2.76329	0.0129647	1.81426	0.000519323	0	1	1	8	1	0	8	14	3	2	8	0	0.869	0.43	2.208	1.266	0	3.215	10.104	9.296	4.766	3.418
CpCp13_RS09240	0	3.9554	0.0164085	3.89482	0.000672733	616	3	6	16	5	0	13	0	0	1	1	146.079	2.606	2.579	4.416	6.328	0	5.224	0	0	2.383	0.427
CpCp13_RS01610	0	2.09382	0.0186688	3.41833	0.000800594	24	23	18	71	8	27	25	8	0	1	0	5.691	19.98	7.737	19.594	10.125	18.237	10.047	5.774	0	2.383	0
CpCp13_RS05300	0	2.11545	0.0186688	7.77457	0.000799234	292	416	1382	1374	119	271	74	127	10	37	315	69.245	361.38	594.06	379.187	150.607	183.042	29.738	91.657	30.988	88.162	134.587
CpCp13_RS07250	0	2.56882	0.0390362	1.54374	0.00200516	34	1	2	13	2	2	3	1	0	0	0	8.063	0.869	0.86	3.588	2.531	1.351	1.206	0.722	0	0	0
CpCp13_RS10410	0	-2.44632	0.0401023	1.88745	0.00209772	8	2	0	5	1	0	6	4	5	0	23	1.897	1.737	0	1.38	1.266	0	2.411	2.887	15.494	0	9.827
CpCp13_RS08075	0	-2.81594	0.0416999	1.19766	0.00222059	4	1	0	1	0	0	3	11	0	1	5	0.949	0.869	0	0.276	0	0	1.206	7.939	0	2.383	2.136
